# Supplementary material for: Comparative Genome Analysis of 19 Trueperella pyogenes Strains Originating from Different Animal Species Reveal a Genetically Diverse Open Pan-Genome
Source: MDPI journal article supplement (doi:10.3390/antibiotics12010024), 2022-12-24
Supplement: s1 [file s1]

**S1 Table.** The Pan-genome and core genome development projections for investigated nineteen *T. pyogenes* strains.

| Pan-genome development extrapolations                        |                      | Core genome development extrapolations                                       |                      |
|--------------------------------------------------------------|----------------------|------------------------------------------------------------------------------|----------------------|
| Contigs                                                      | Mean number of genes | Contigs                                                                      | Mean number of genes |
| 2                                                            | 2258.020             | 2                                                                            | 1866.175             |
| 3                                                            | 2379.335             | 3                                                                            | 1794.530             |
| 4                                                            | 2480.355             | 4                                                                            | 1751.895             |
| 5                                                            | 2556.745             | 5                                                                            | 1727.975             |
| 6                                                            | 2626.260             | 6                                                                            | 1696.270             |
| 7                                                            | 2691.545             | 7                                                                            | 1688.715             |
| 8                                                            | 2755.005             | 8                                                                            | 1652.275             |
| 9                                                            | 2810.825             | 9                                                                            | 1647.690             |
| 10                                                           | 2866.105             | 10                                                                           | 1634.280             |
| 11                                                           | 2903.440             | 11                                                                           | 1611.755             |
| 12                                                           | 2951.120             | 12                                                                           | 1601.465             |
| 13                                                           | 2996.825             | 13                                                                           | 1590.550             |
| 14                                                           | 3035.105             | 14                                                                           | 1575.790             |
| 15                                                           | 3074.840             | 15                                                                           | 1567.640             |
| 16                                                           | 3109.275             | 16                                                                           | 1558.030             |
| 17                                                           | 3141.885             | 17                                                                           | 1545.250             |
| 18                                                           | 3180.080             | 18                                                                           | 1533.075             |
| 19                                                           | 3215.565             | 19                                                                           | 1520.560             |
| Heap's Law extrapolation                                     |                      | Heap's Law extrapolation                                                     |                      |
| Growth exponent y:<br>0.162 (alpha 0.838)                    |                      | Converges to:<br>1488.954                                                    |                      |
| Confidence interval (95%) for y:<br>0.157 to 0.167           |                      | Confidence interval (95%):<br>from 1457.440 to 1520.468                      |                      |
| Fitted model:<br>$1980.179 * x^{0.162}$                      |                      | Fitted model:<br>$451.953 * \exp(-x/8.271) + 1488.954$                       |                      |
| Lower confidence interval formula:<br>$1956.250 * x^{0.157}$ |                      | Lower confidence interval formula:<br>$427.939 * \exp(-x/6.530) + 1457.440$  |                      |
| Upper confidence interval formula:<br>$2004.109 * x^{0.167}$ |                      | Upper confidence interval formula:<br>$475.966 * \exp(-x/10.013) + 1520.468$ |                      |
