# Supplementary material for: Comparative Genome Analysis of 19 Trueperella pyogenes Strains Originating from Different Animal Species Reveal a Genetically Diverse Open Pan-Genome
Source: MDPI journal article supplement (doi:10.3390/antibiotics12010024), 2022-12-24
Supplement: s1 [file s1]

**Supplementary Figure 2 (a-h)** Multiple sequence alignment of crucial virulence factors such as pyolysin (plo), collagen-binding protein A (*cbpa*), neuraminidases (*nanH* and *nanP*), and fimbriae (*fimA*, *fimC*, *fimE*, and *fimJ*) which were identified in investigated *T.pyogenes* genomesby NCBI COBALT. Only alignment positions with no gaps will be colored. Red depicts highly conserved positions and blue depicts lower conservation. This method highlights highly conserved and less conserved amino acid positions on the basis of relative entropy

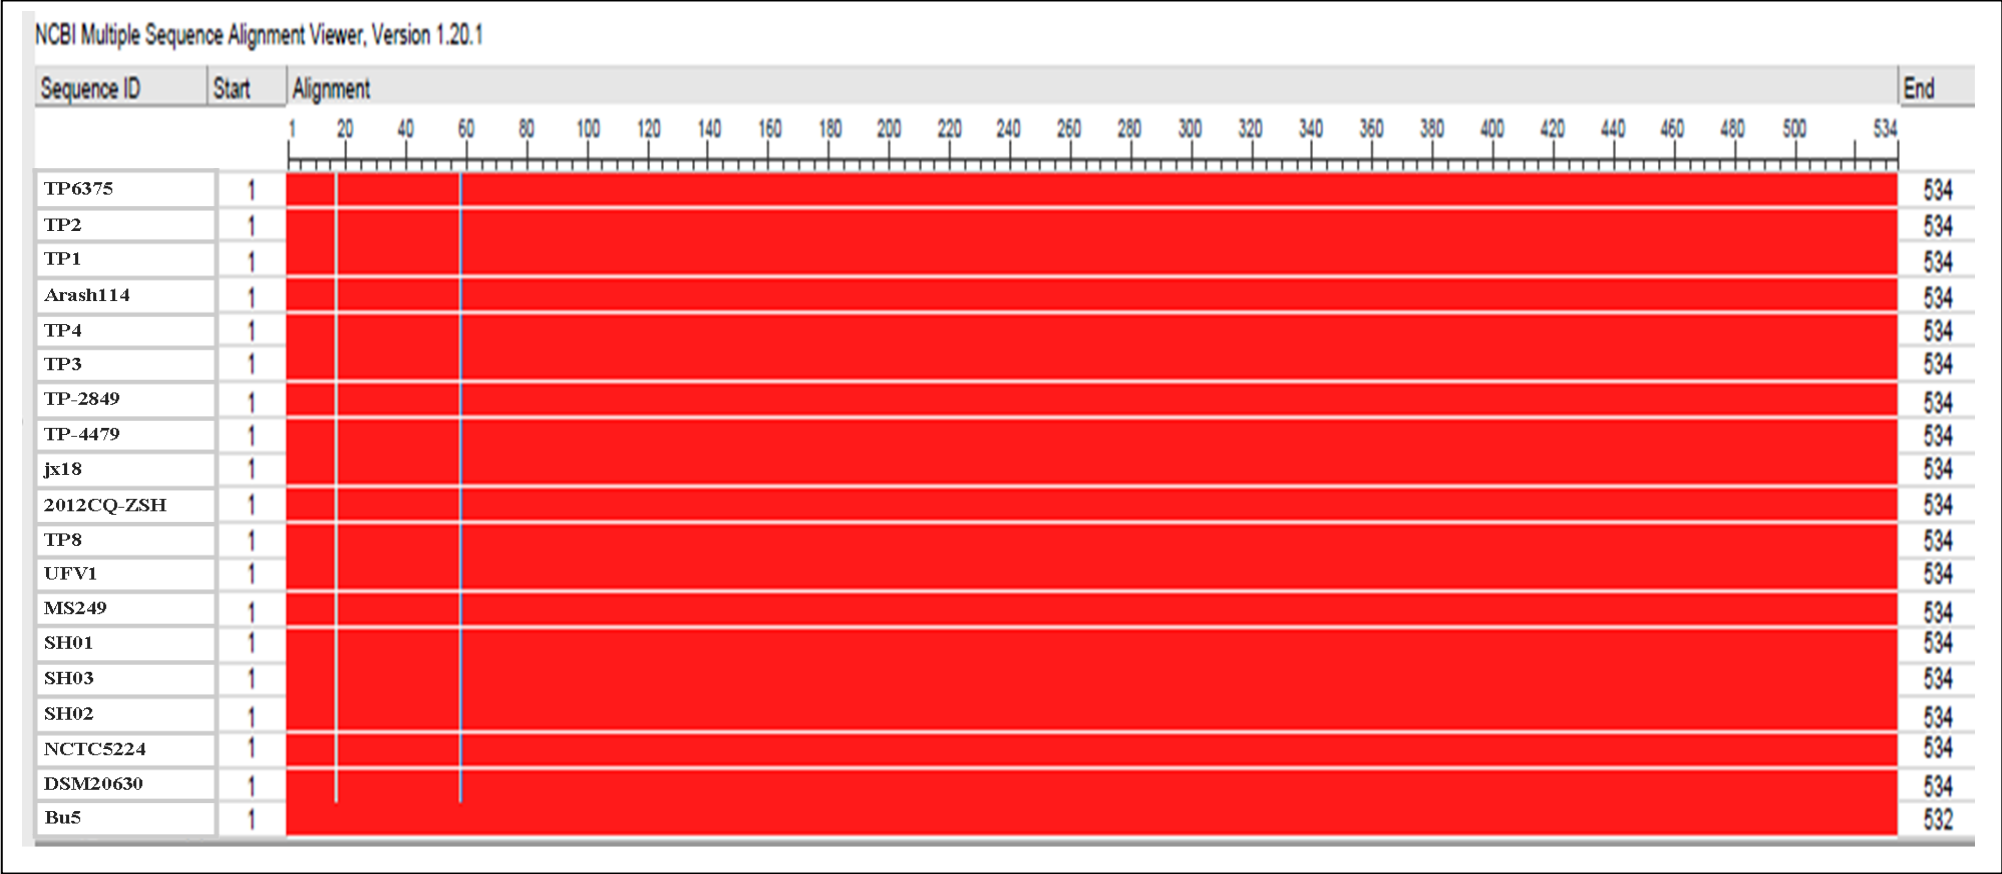

**(a) Multiple sequence alignment of pyolysin (plo) proteins identified in investigated *T. pyogenes* genomesby NCBI COBALT.**

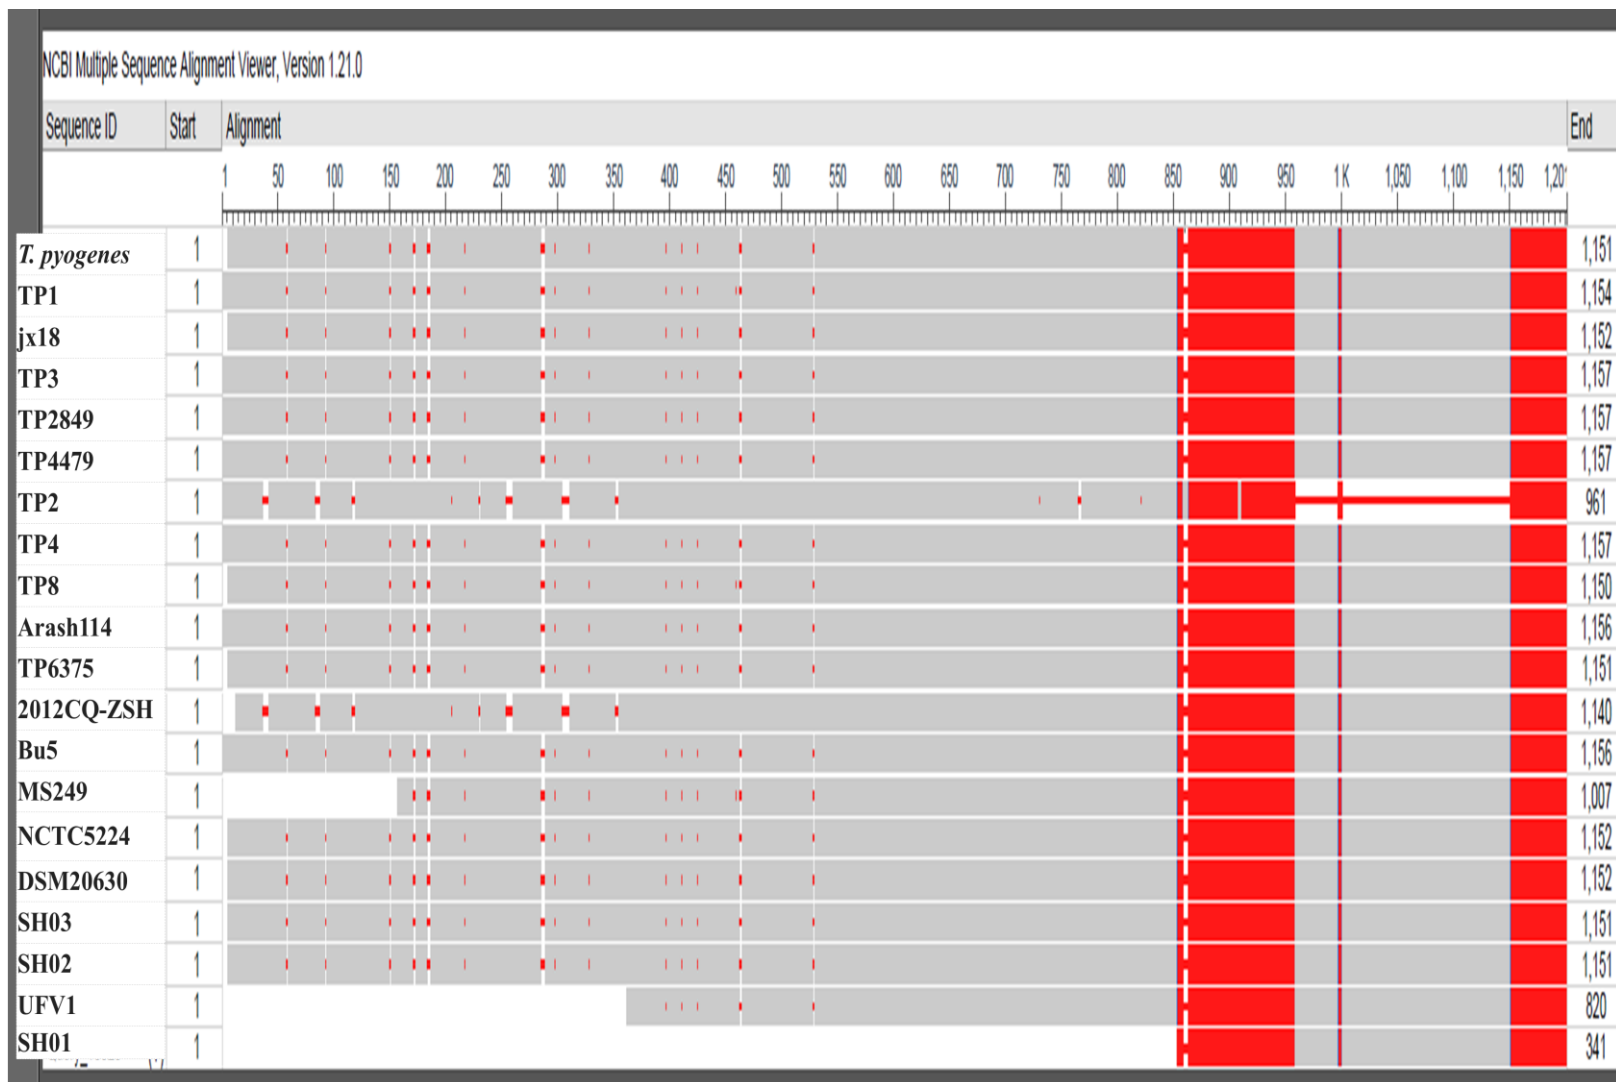

**(b) Multiple sequence alignment of collagen-binding protein A (*cbpa*) proteins identified in investigated *T. pyogenes* genomes by NCBI COBALT.**

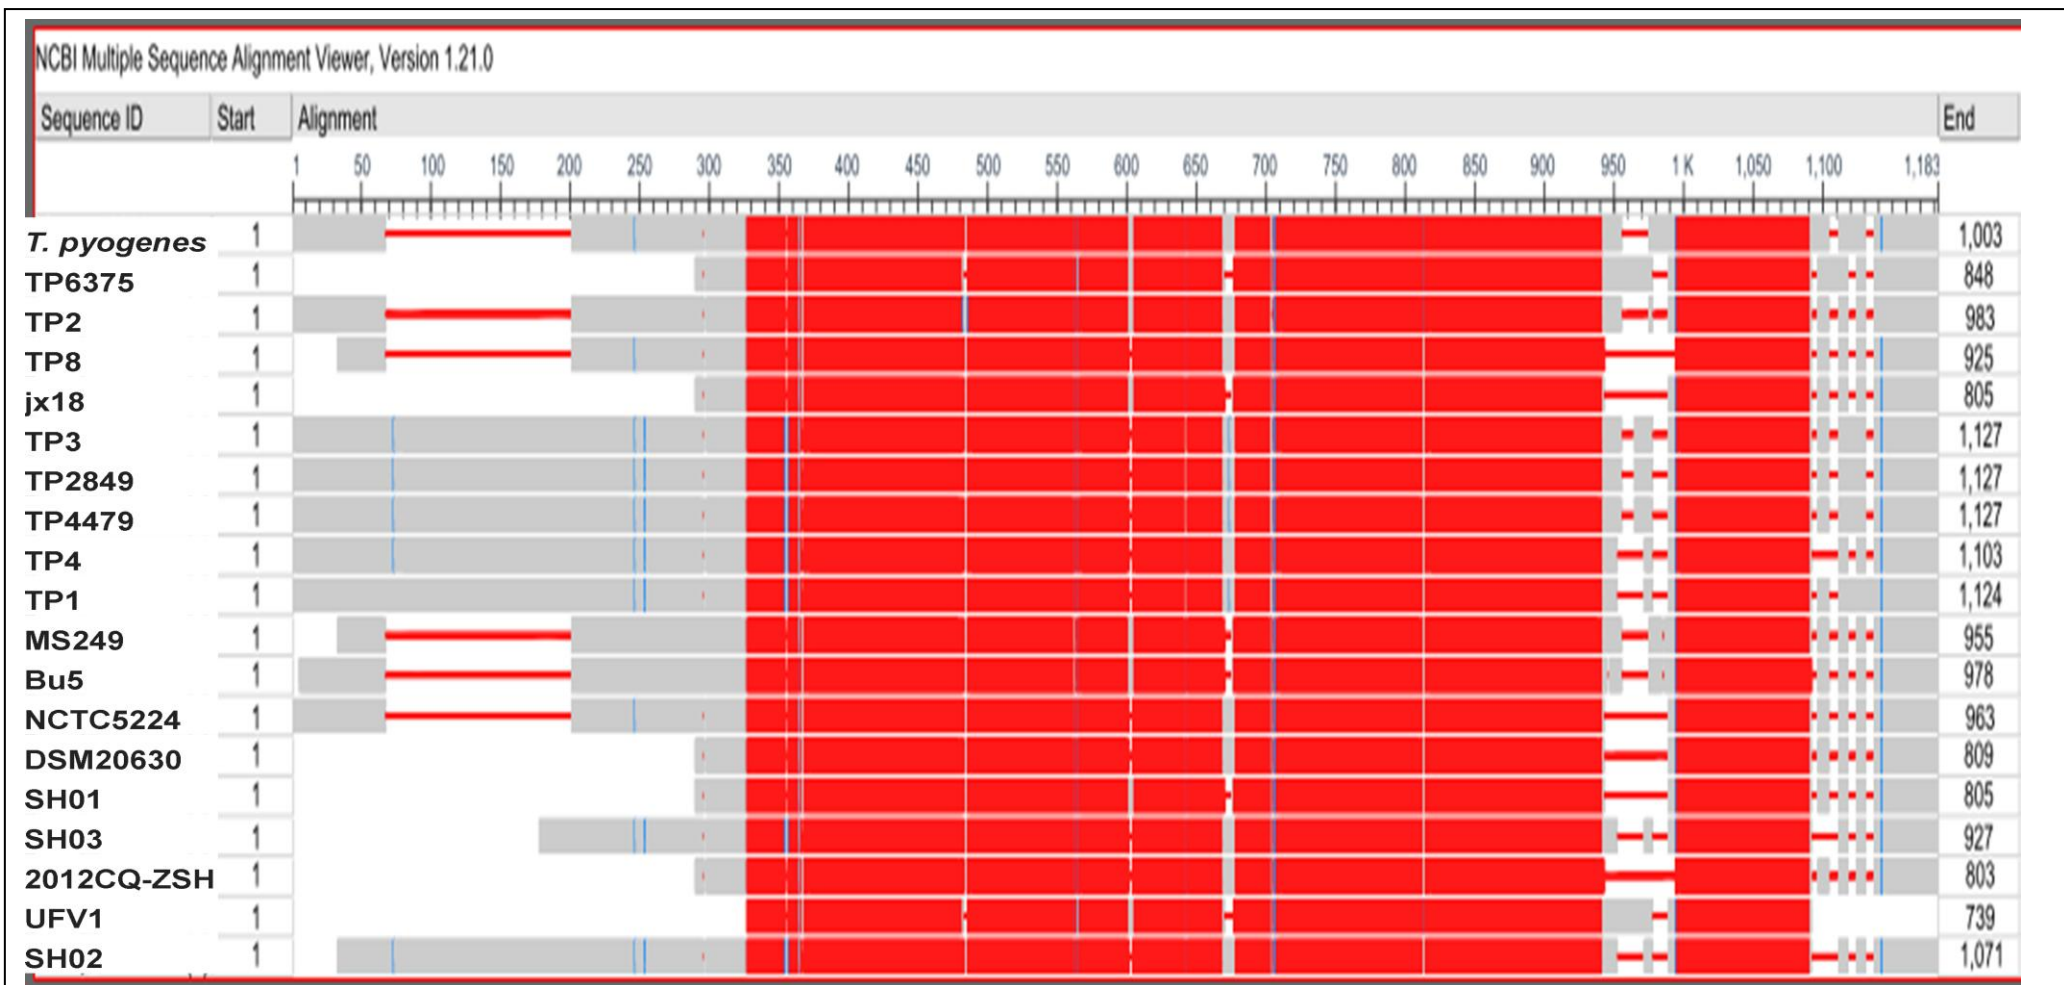

(c) Multiple sequence alignment of neuraminidases H (*nanH*) proteins identified in investigated *T. pyogenes* genomes by NCBI COBALT.

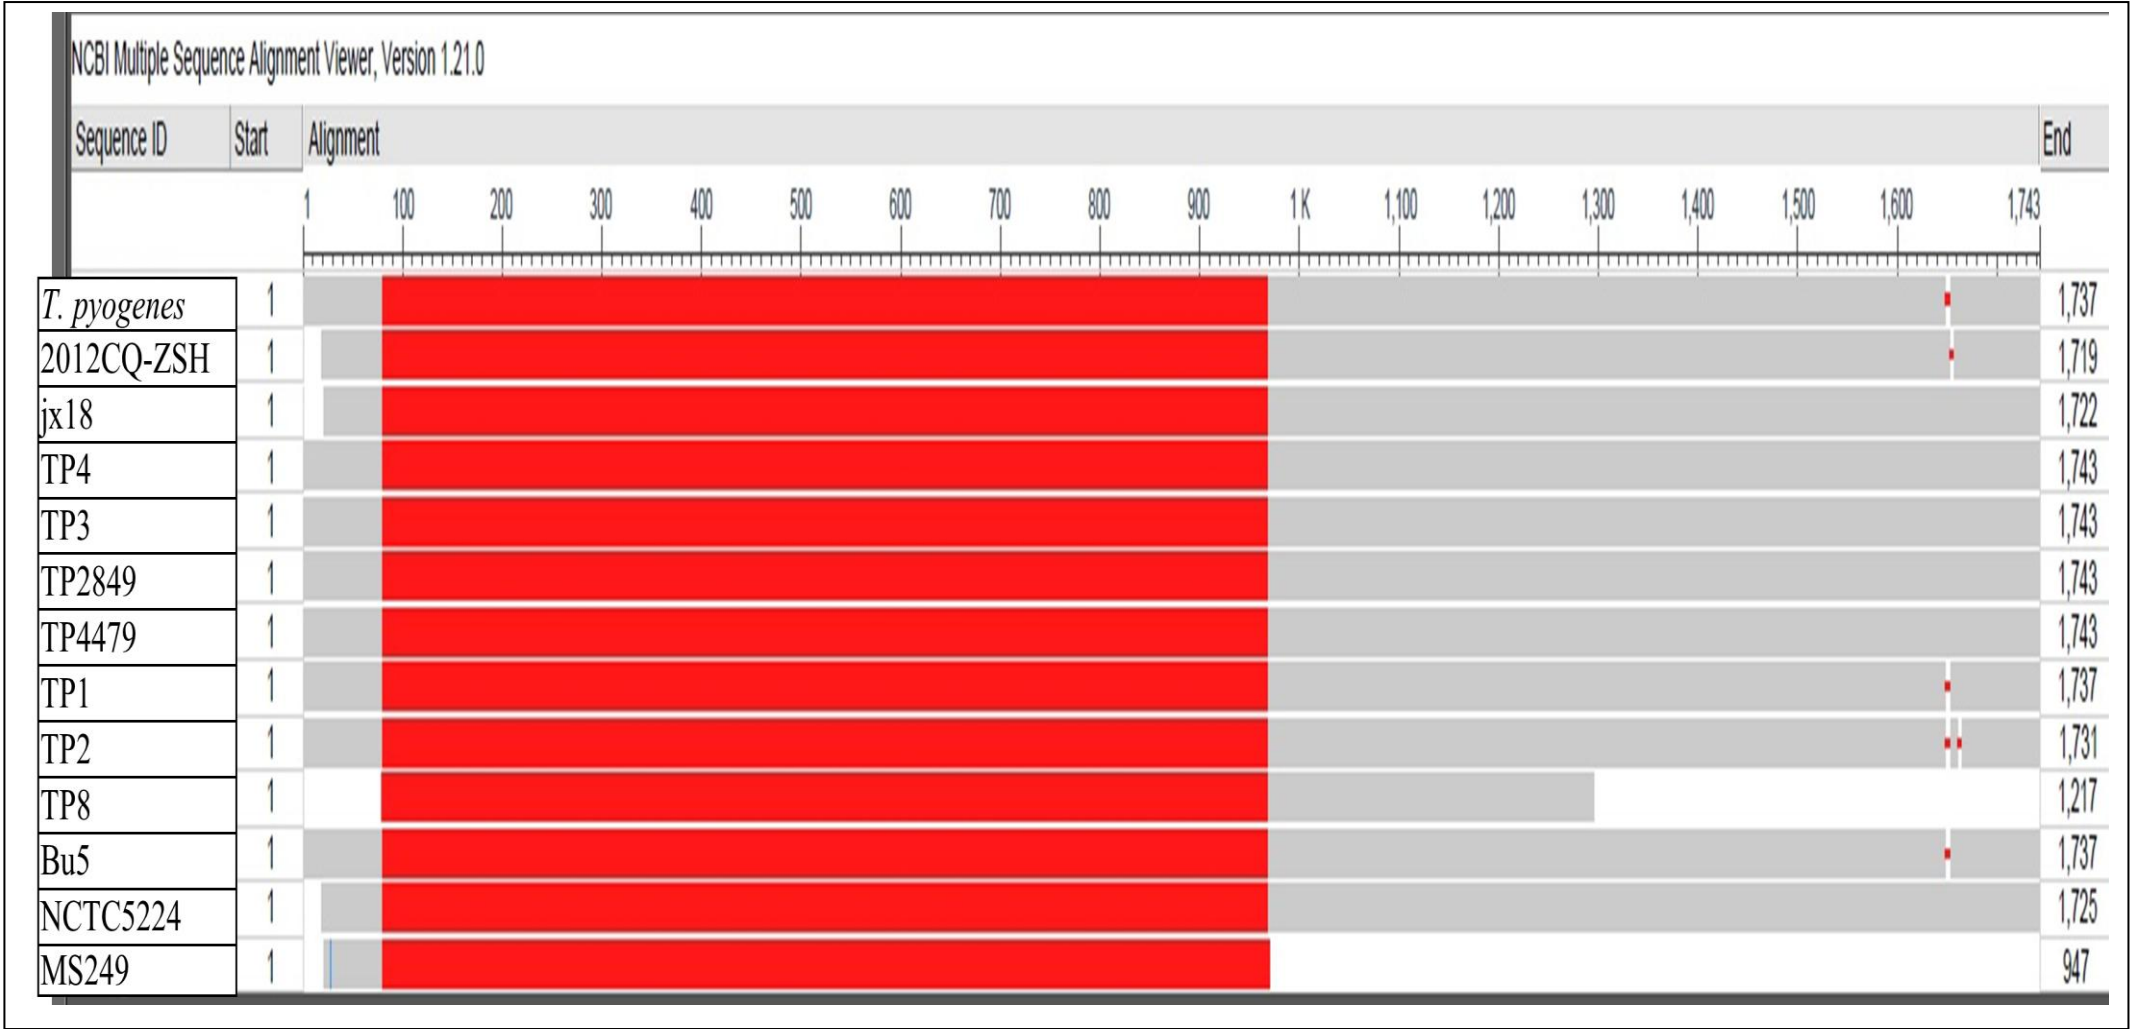

(d) Multiple sequence alignment of neuraminidases P (*nanP*) proteins identified in the investigated *T. pyogenes* genomes by NCBI COBALT.

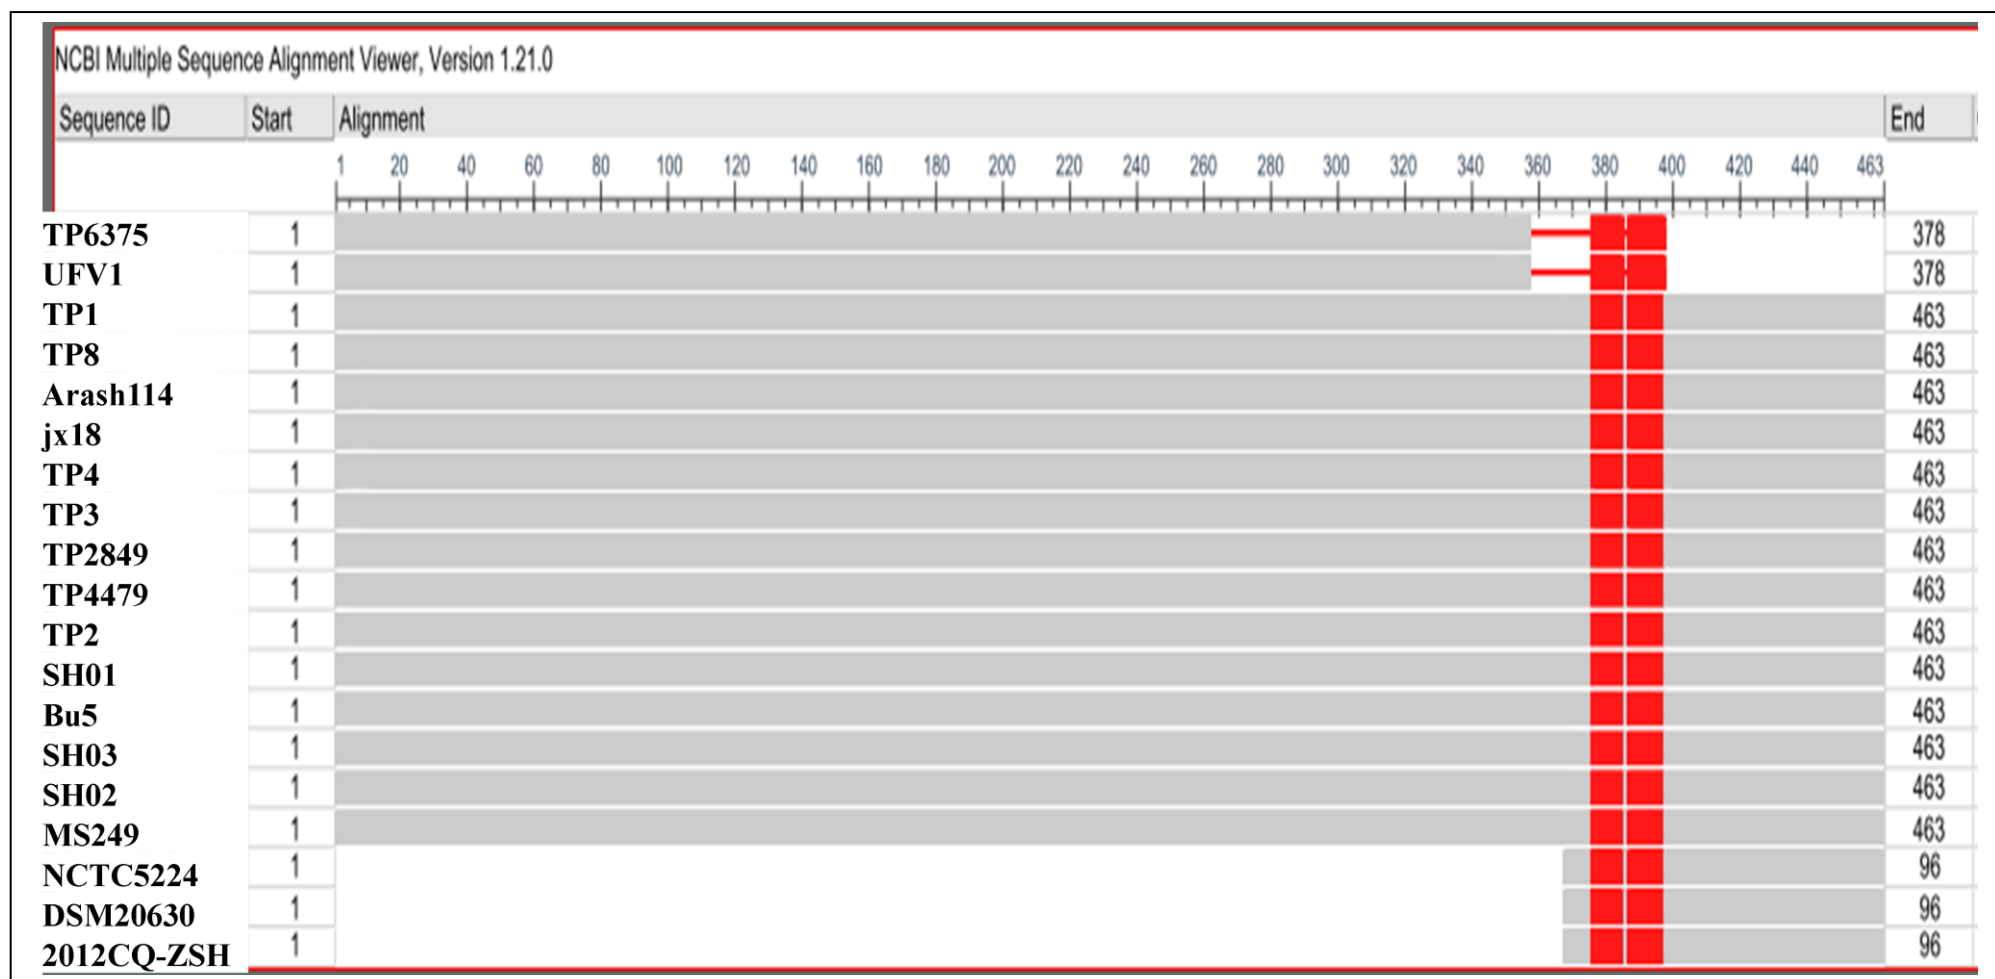

(e) Multiple sequence alignment of *fimA* proteins identified in the investigated *T. pyogenes* genomes by NCBI COBALT.

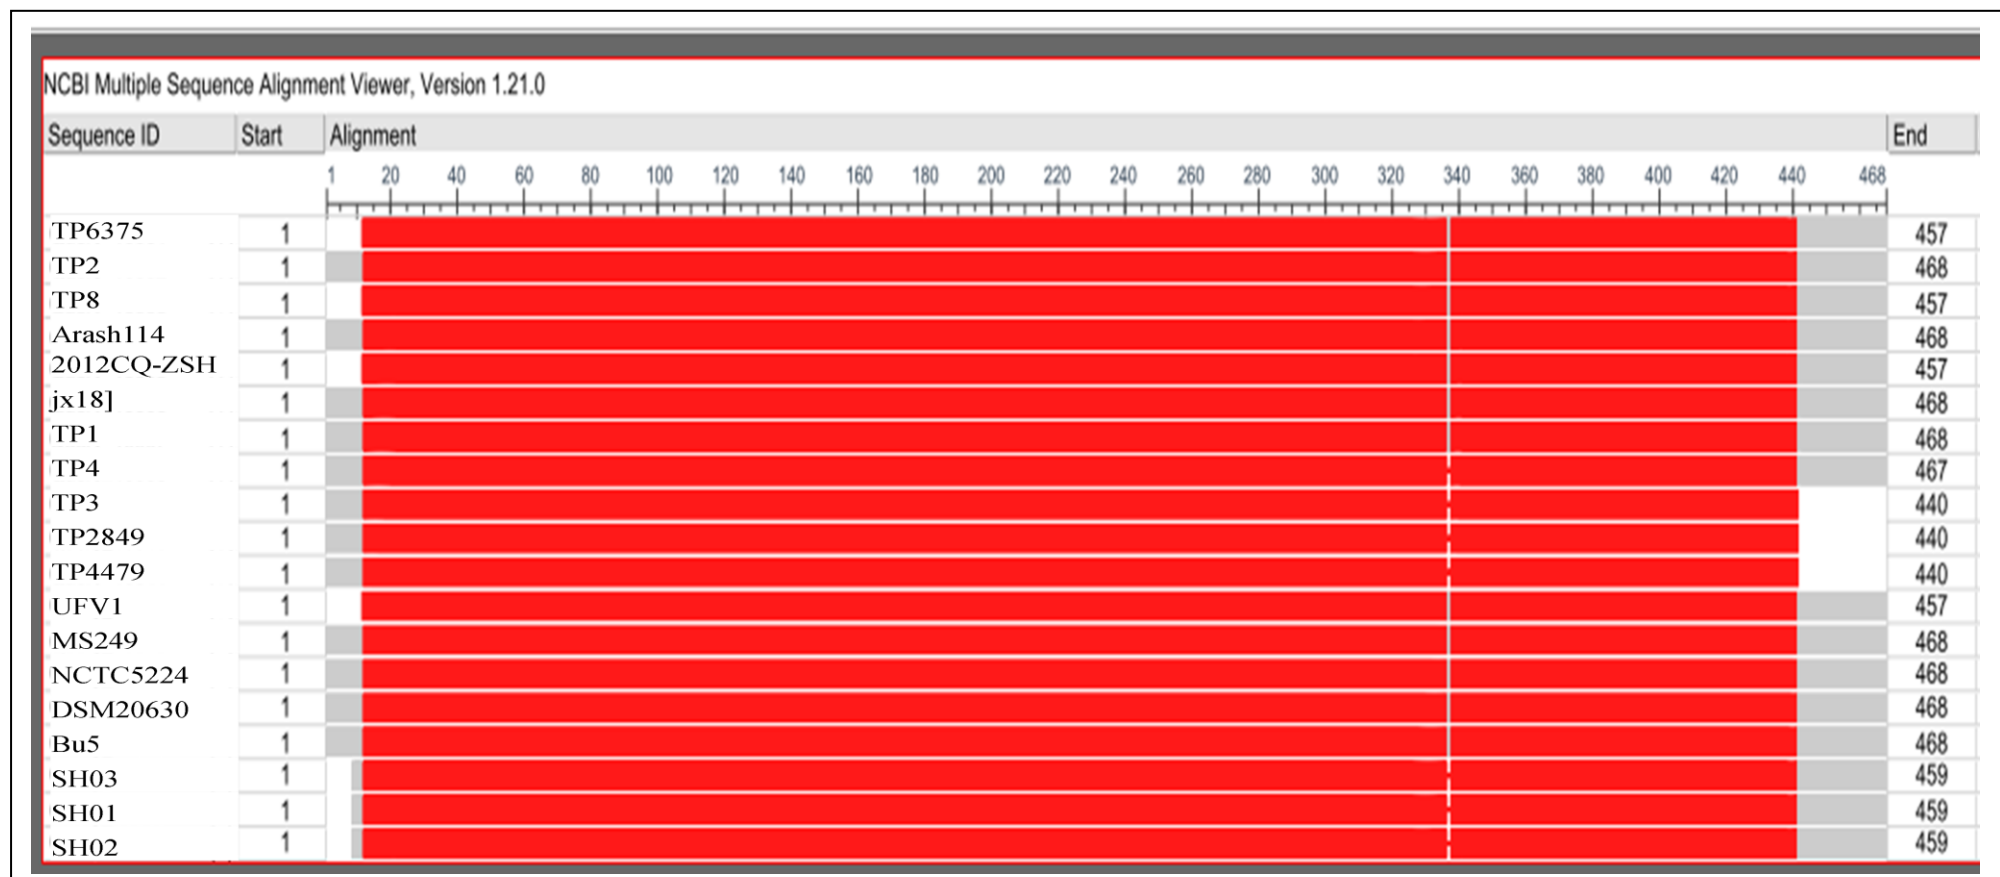

(f) Multiple sequence alignment of *fimC* proteins identified in the investigated *T. pyogenes* genomes by NCBI COBALT.

NCBI Multiple Sequence Alignment Viewer, Version 1.20.1

| Sequence ID | Start | Alignment                                        | End |
|-------------|-------|--------------------------------------------------|-----|
|             |       | 1 50 100 150 200 250 300 350 400 450 500 550 580 |     |
| TP6375      | 1     |                                                  | 583 |
| Arash114    | 1     |                                                  | 583 |
| TP3         | 1     |                                                  | 584 |
| TP2849      | 1     |                                                  | 584 |
| TP4479      | 1     |                                                  | 584 |
| TP2         | 1     |                                                  | 583 |
| TP1         | 1     |                                                  | 583 |
| TP8         | 1     |                                                  | 584 |
| 2012CQ-ZSH  | 1     |                                                  | 584 |
| jx18        | 1     |                                                  | 581 |
| TP4         | 1     |                                                  | 581 |
| UFV1        | 1     |                                                  | 583 |
| SH03        | 1     |                                                  | 583 |
| SH01        | 1     |                                                  | 584 |
| SH02        | 1     |                                                  | 584 |
| Bu5         | 1     |                                                  | 585 |
| MS249       | 1     |                                                  | 530 |
| NCTC5224    | 1     |                                                  | 584 |
| DSM20630    | 1     |                                                  | 584 |

(g) Multiple sequence alignment of *fimE* proteins identified in the investigated *T. pyogenes* genomes by NCBI COBALT.

NCBI Multiple Sequence Alignment Viewer, Version 1.20.1

| Sequence ID | Start | Alignment                                            | End |
|-------------|-------|------------------------------------------------------|-----|
|             |       | 1 50 100 150 200 250 300 350 400 450 500 550 600 647 |     |
| TP6375      | 1     |                                                      | 600 |
| Arash114    | 1     |                                                      | 612 |
| jx18        | 1     |                                                      | 545 |
| TP4         | 1     |                                                      | 558 |
| TP3         | 1     |                                                      | 558 |
| TP2849      | 1     |                                                      | 558 |
| TP4479      | 1     |                                                      | 558 |
| 2012CQ_ZSH  | 1     |                                                      | 542 |
| TP2         | 1     |                                                      | 552 |
| TP8         | 1     |                                                      | 539 |
| TP1         | 1     |                                                      | 555 |
| SH01        | 1     |                                                      | 542 |
| NCTC5224    | 1     |                                                      | 540 |
| DSM20630    | 1     |                                                      | 540 |
| SH03        | 1     |                                                      | 582 |
| SH02        | 1     |                                                      | 582 |
| MS249       | 1     |                                                      | 539 |

**(h) Multiple sequence alignment of *fimJ* proteins identified in the investigated *T. pyogenes* genomes by NCBI COBALT.**
