# Supplementary material for: Comparative Genome Analysis of 19 Trueperella pyogenes Strains Originating from Different Animal Species Reveal a Genetically Diverse Open Pan-Genome
Source: MDPI journal article supplement (doi:10.3390/antibiotics12010024), 2022-12-24
Supplement: s1 [file s1]

**Supplementary Figure 1 (a-j)** Synteny plot of investigated *T. pyogenes* complete genomes against reference *T. pyogenes* TP6375 genome.

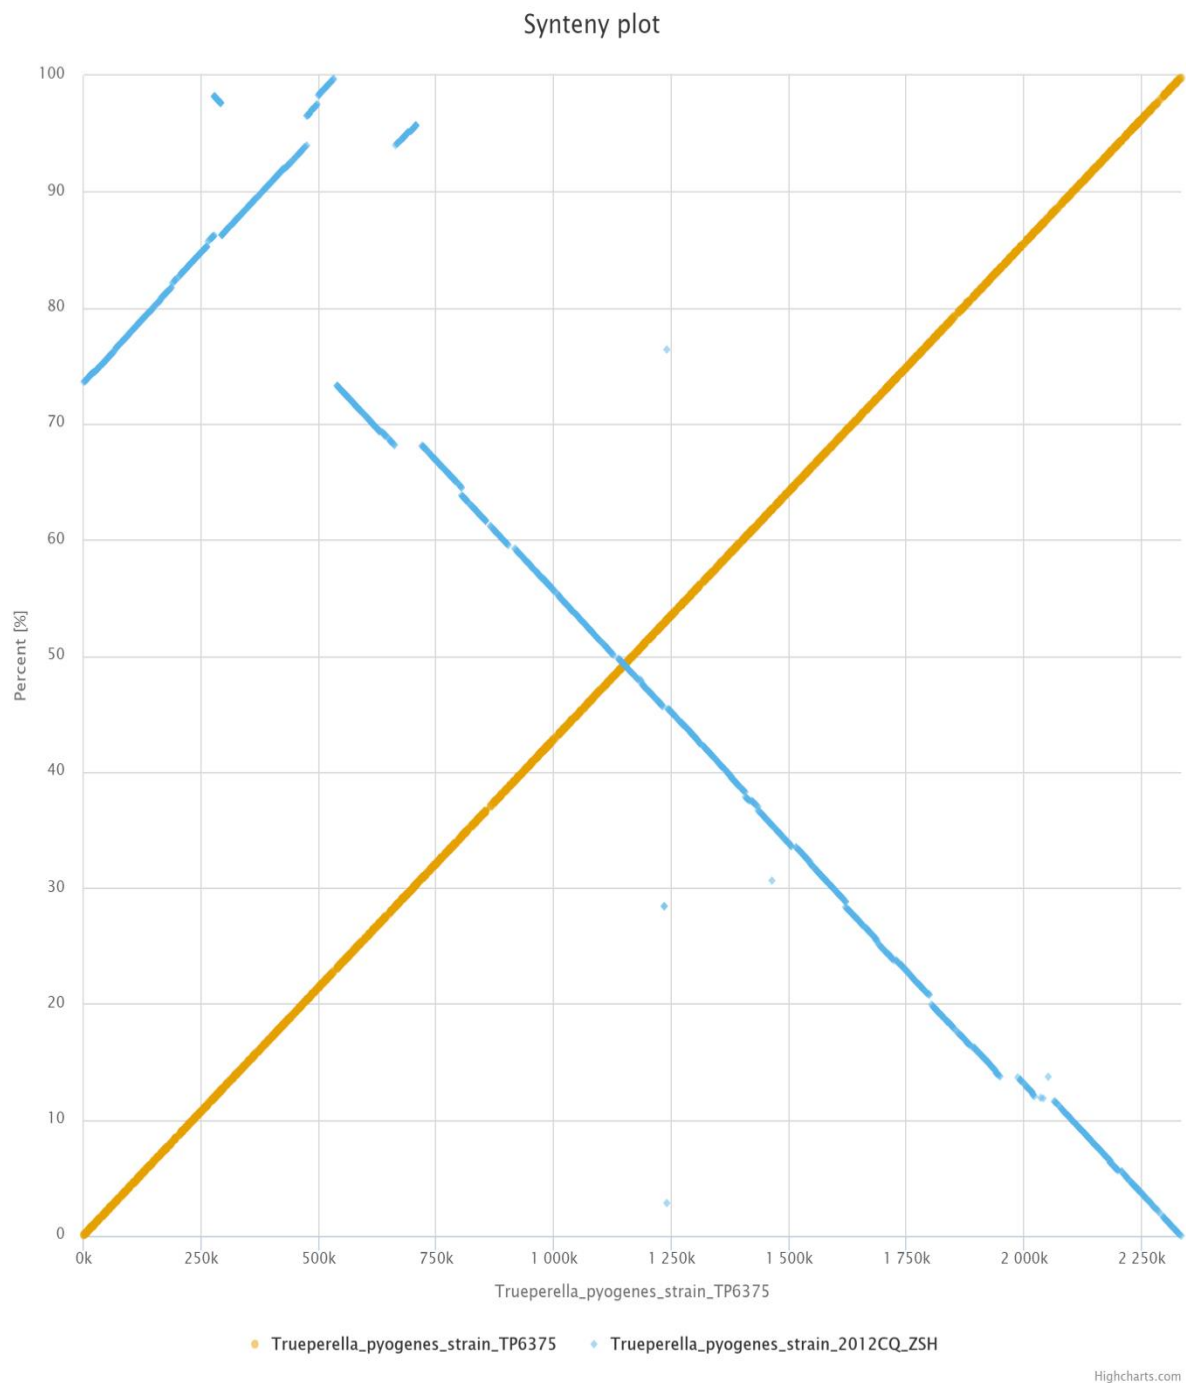

**Supplementary Figure 1 (a)** Synteny plot of *T. pyogenes* 2012CQ-ZSH genome against *T. pyogenes* TP6375 genome.

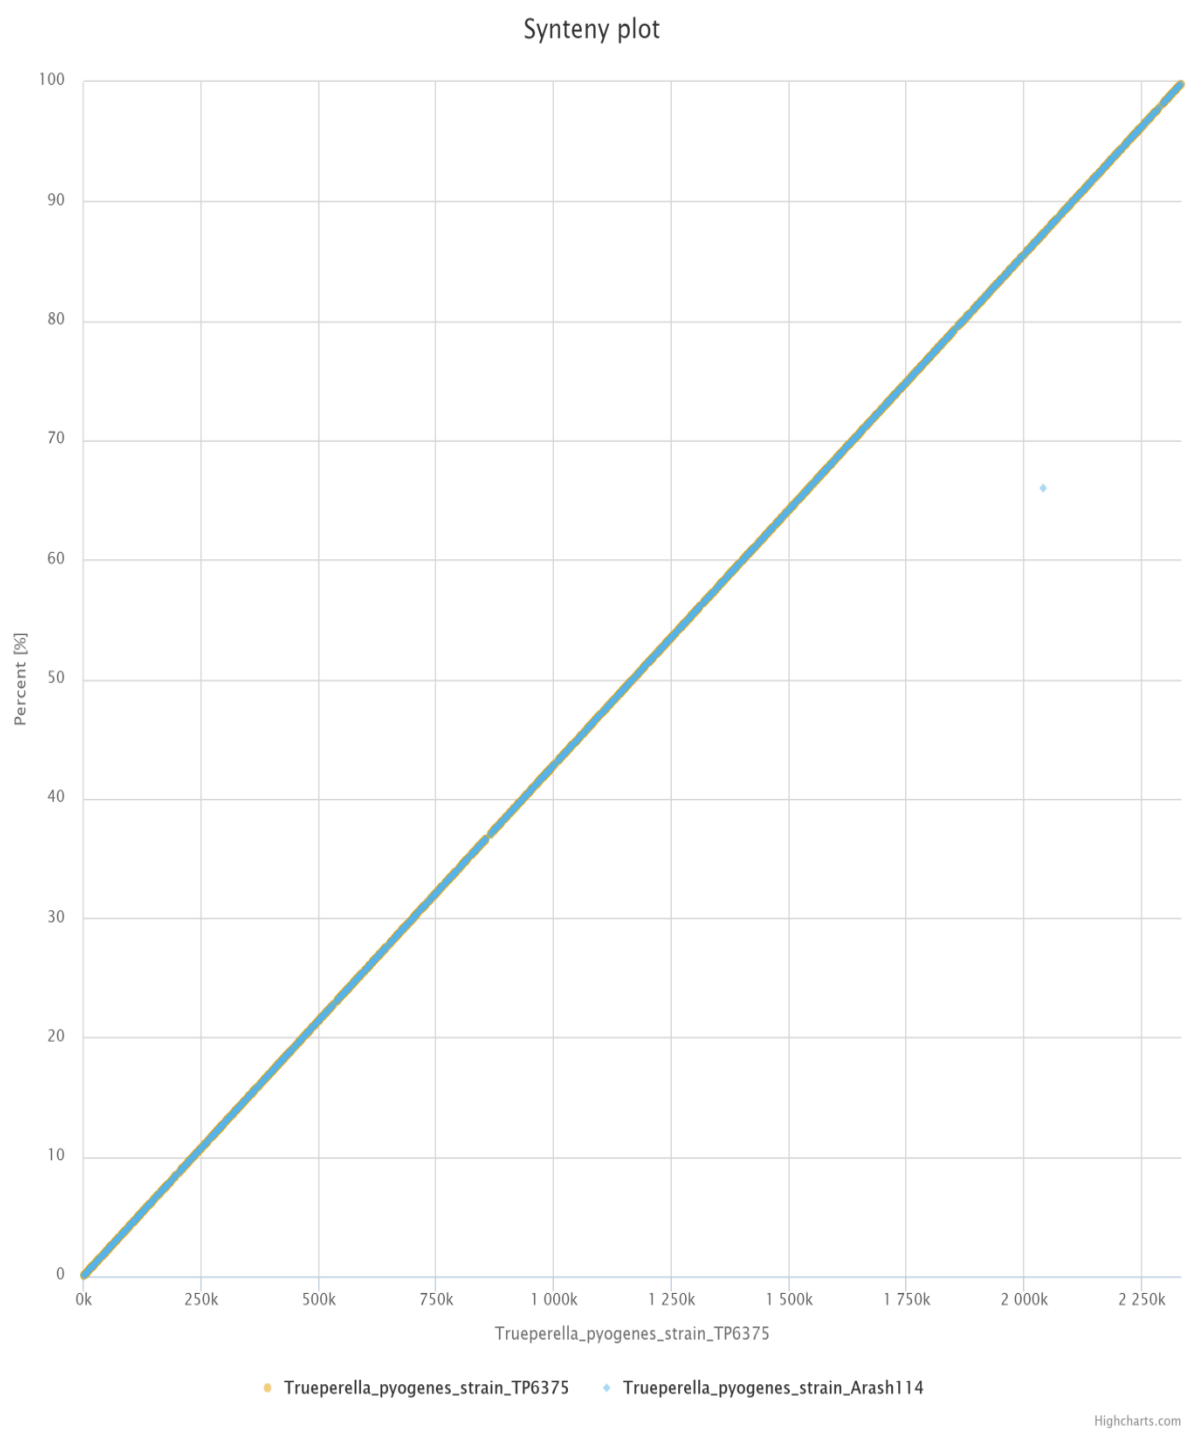

**Supplementary Figure 1 (b)** Synteny plot of *T. pyogenes* Arash114 genome against *T. pyogenes* TP6375 genome.

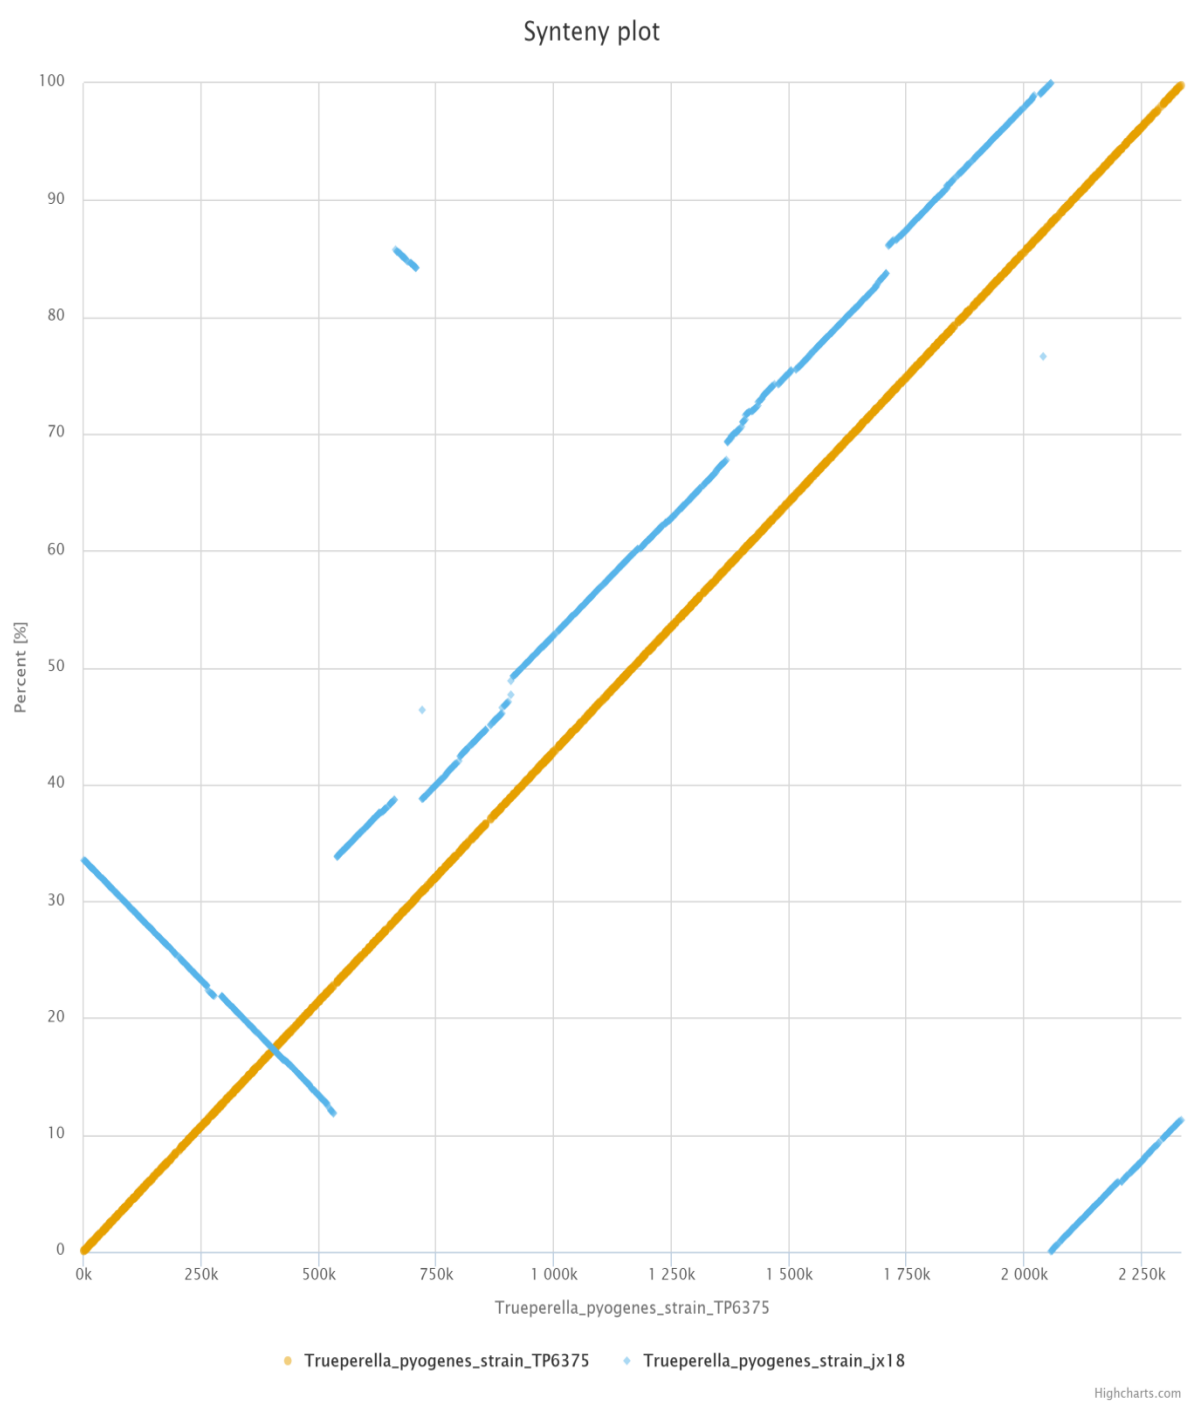

**Supplementary Figure 1 (c)** Synteny plot of *T. pyogenes* jx18 genome against *T. pyogenes* TP6375 genome.

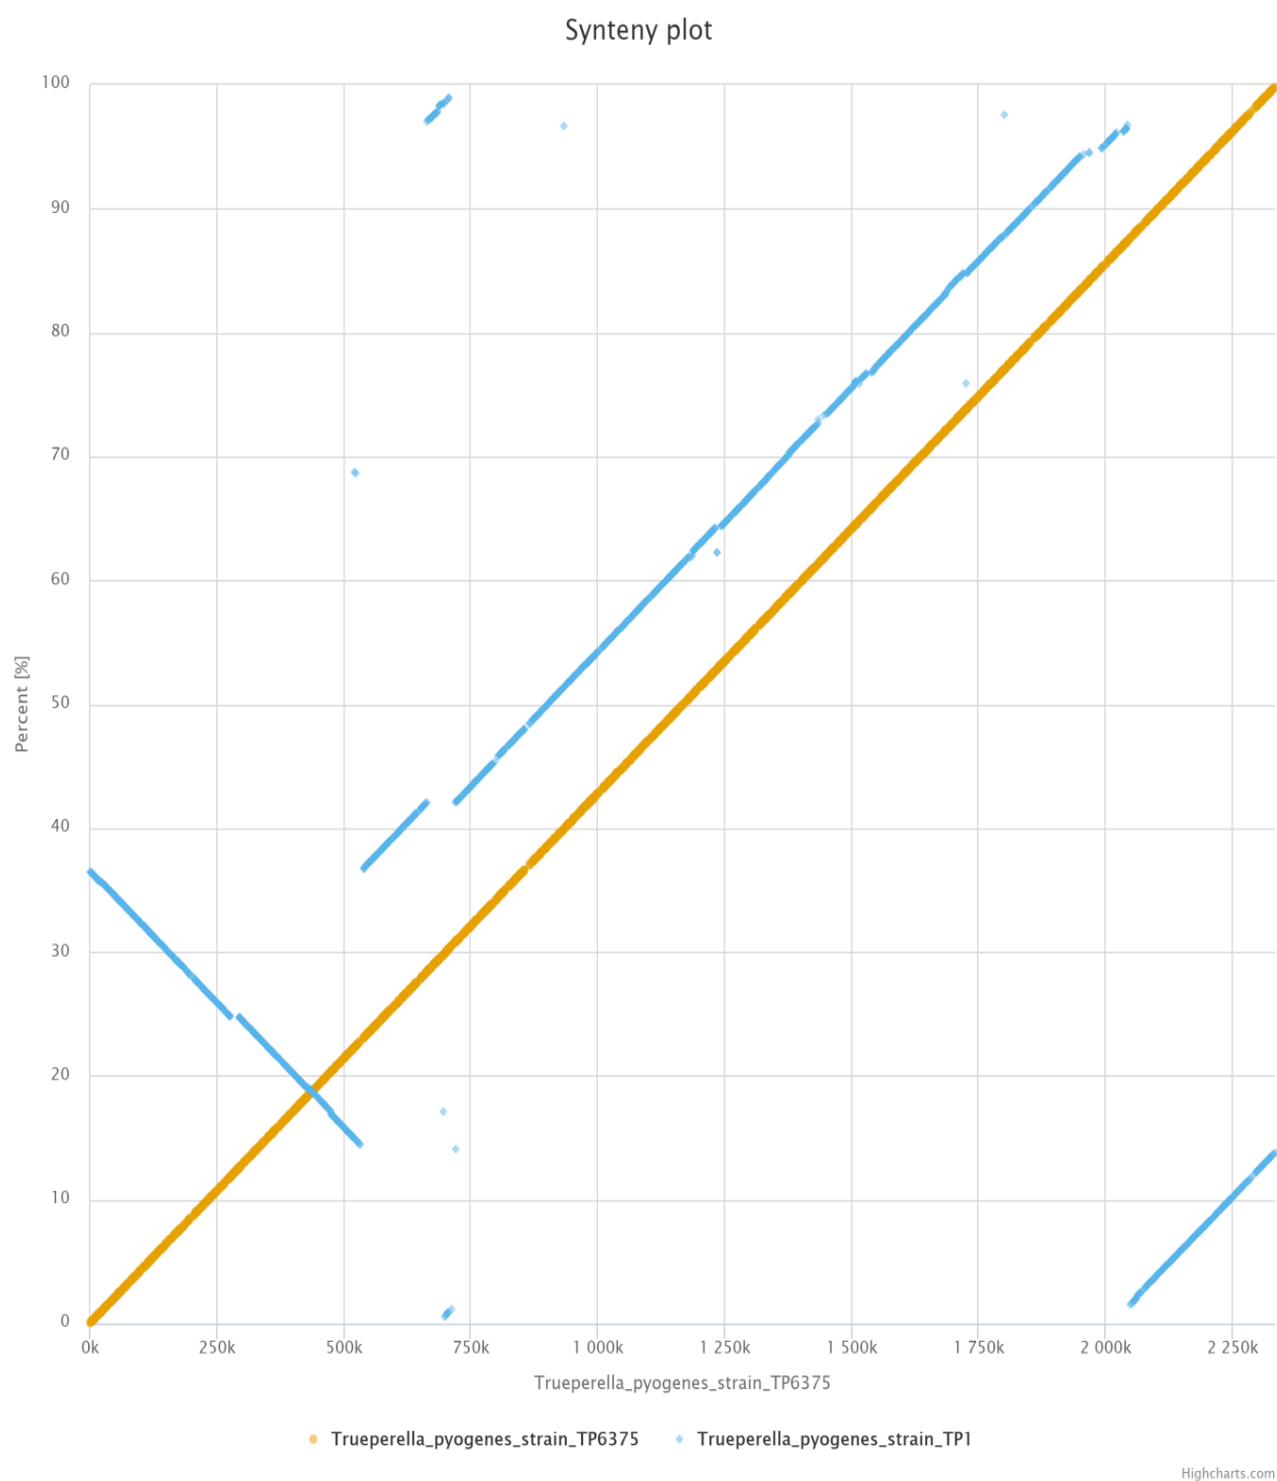

**Supplementary Figure 1 (d)** Synteny plot of *T. pyogenes* TP1 genome against *T. pyogenes* TP6375 genome.

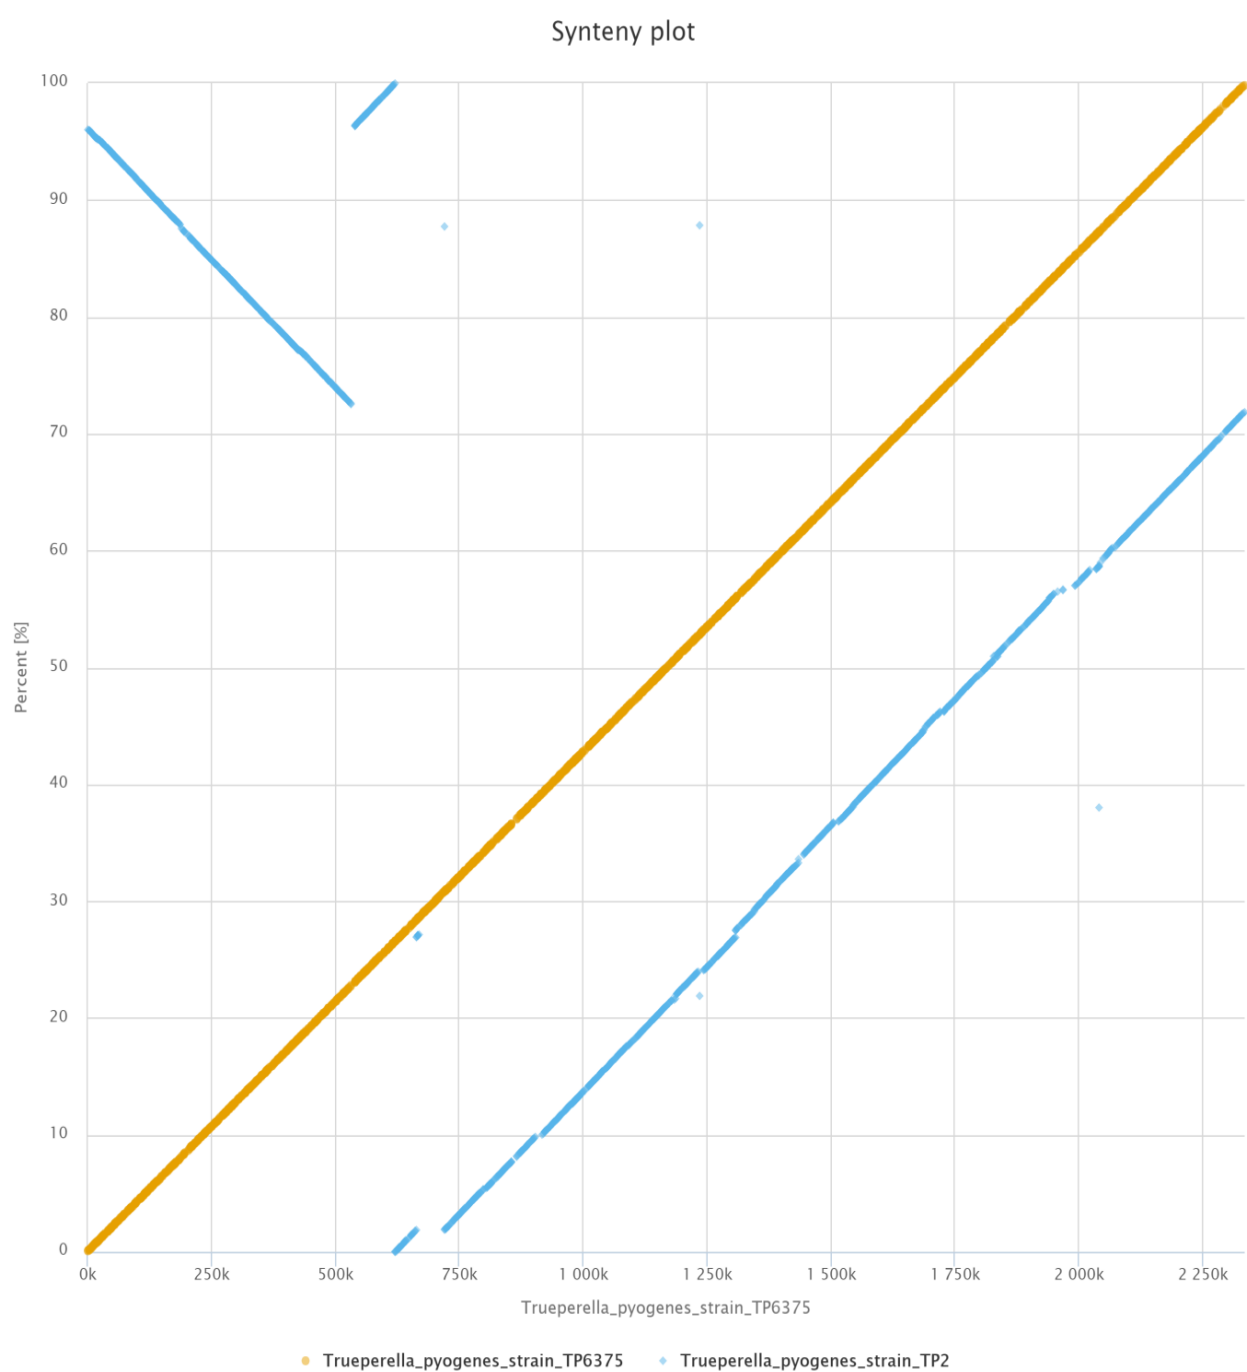

Highcharts.com

**Supplementary Figure 1 (e)** Synteny plot of *T. pyogenes* TP2 genome against *T. pyogenes* TP6375 genome.

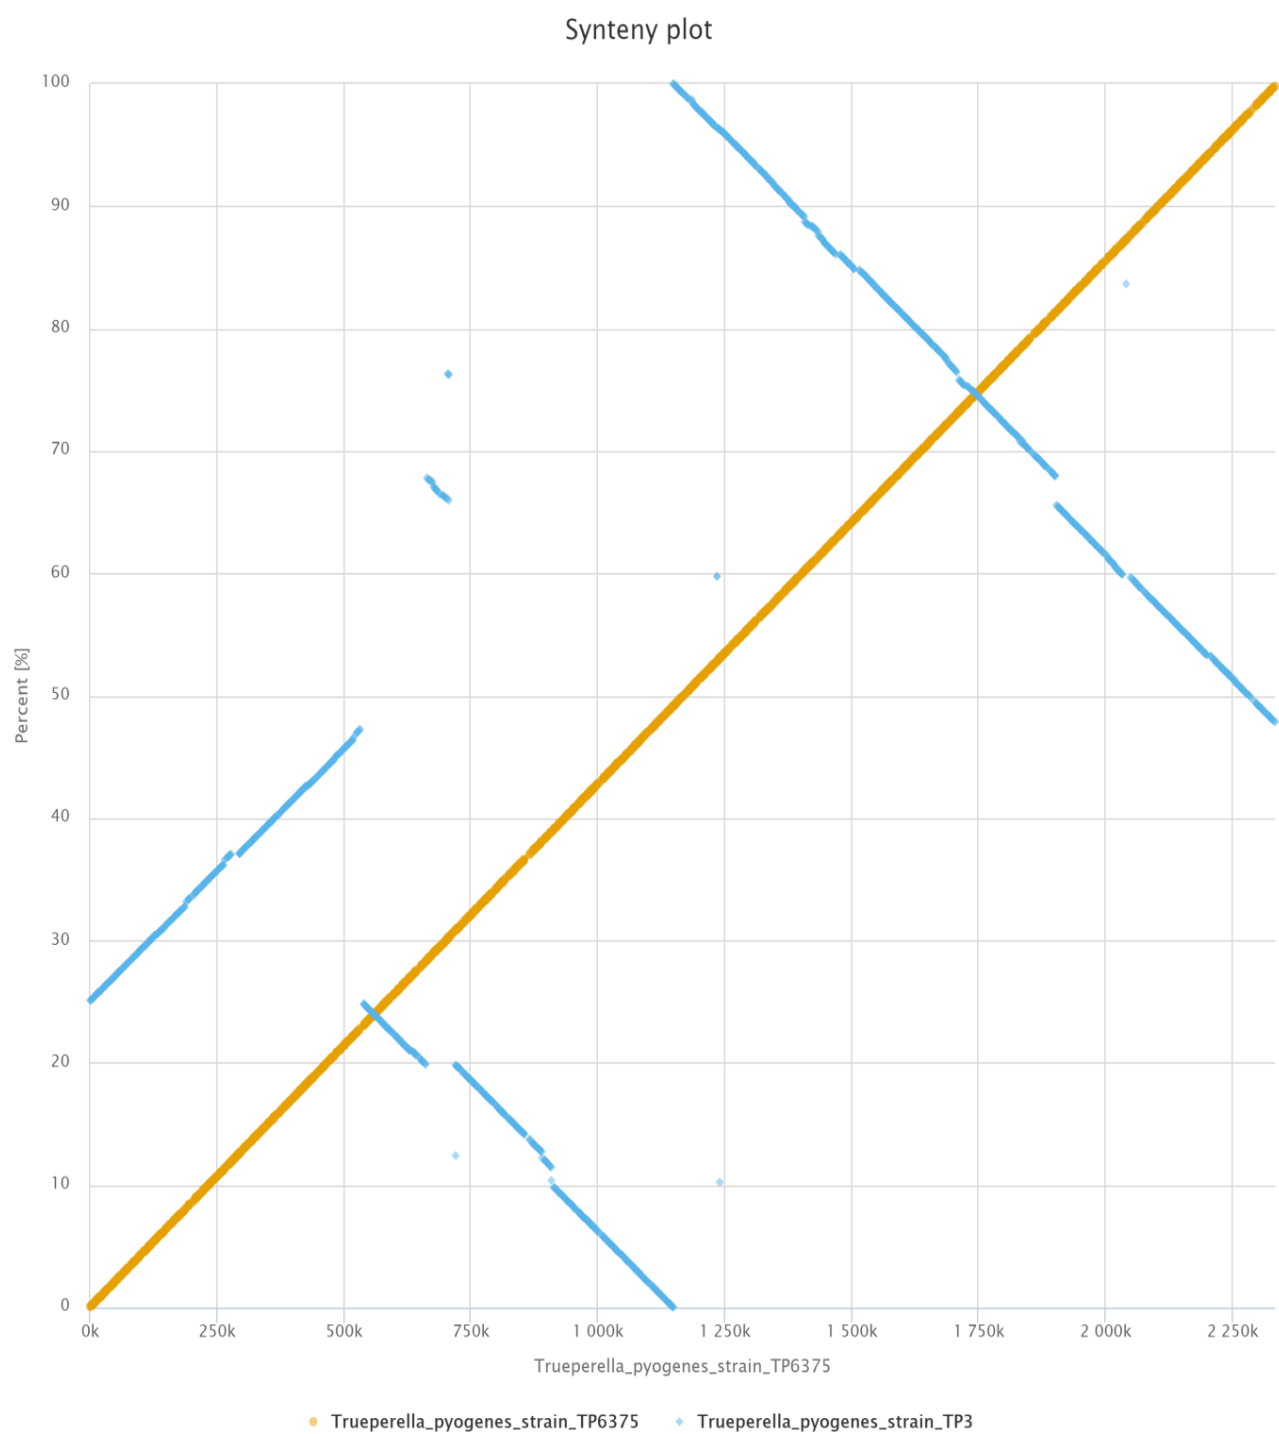

**Supplementary Figure 1 (f)** Synteny plot of *T. pyogenes* TP3 genome against *T. pyogenes* TP6375 genome.

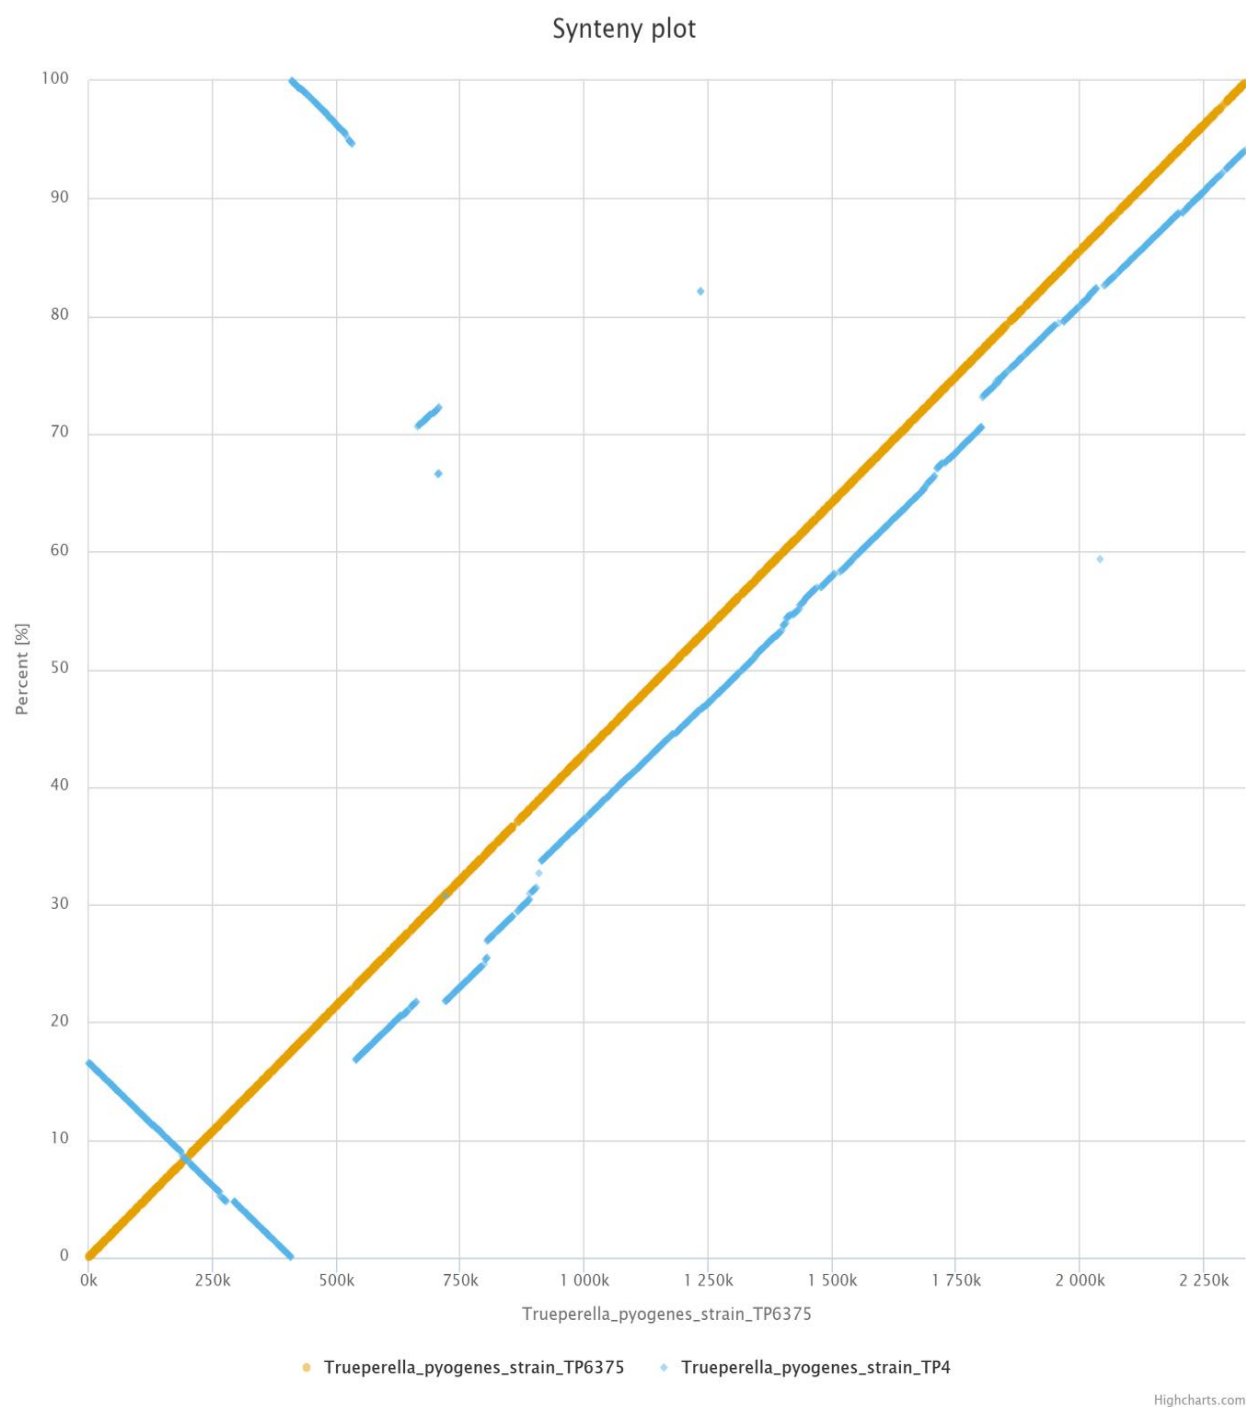

**Supplementary Figure 1 (g)** Synteny plot of *T. pyogenes* TP4 genome against *T. pyogenes* TP6375 genome.

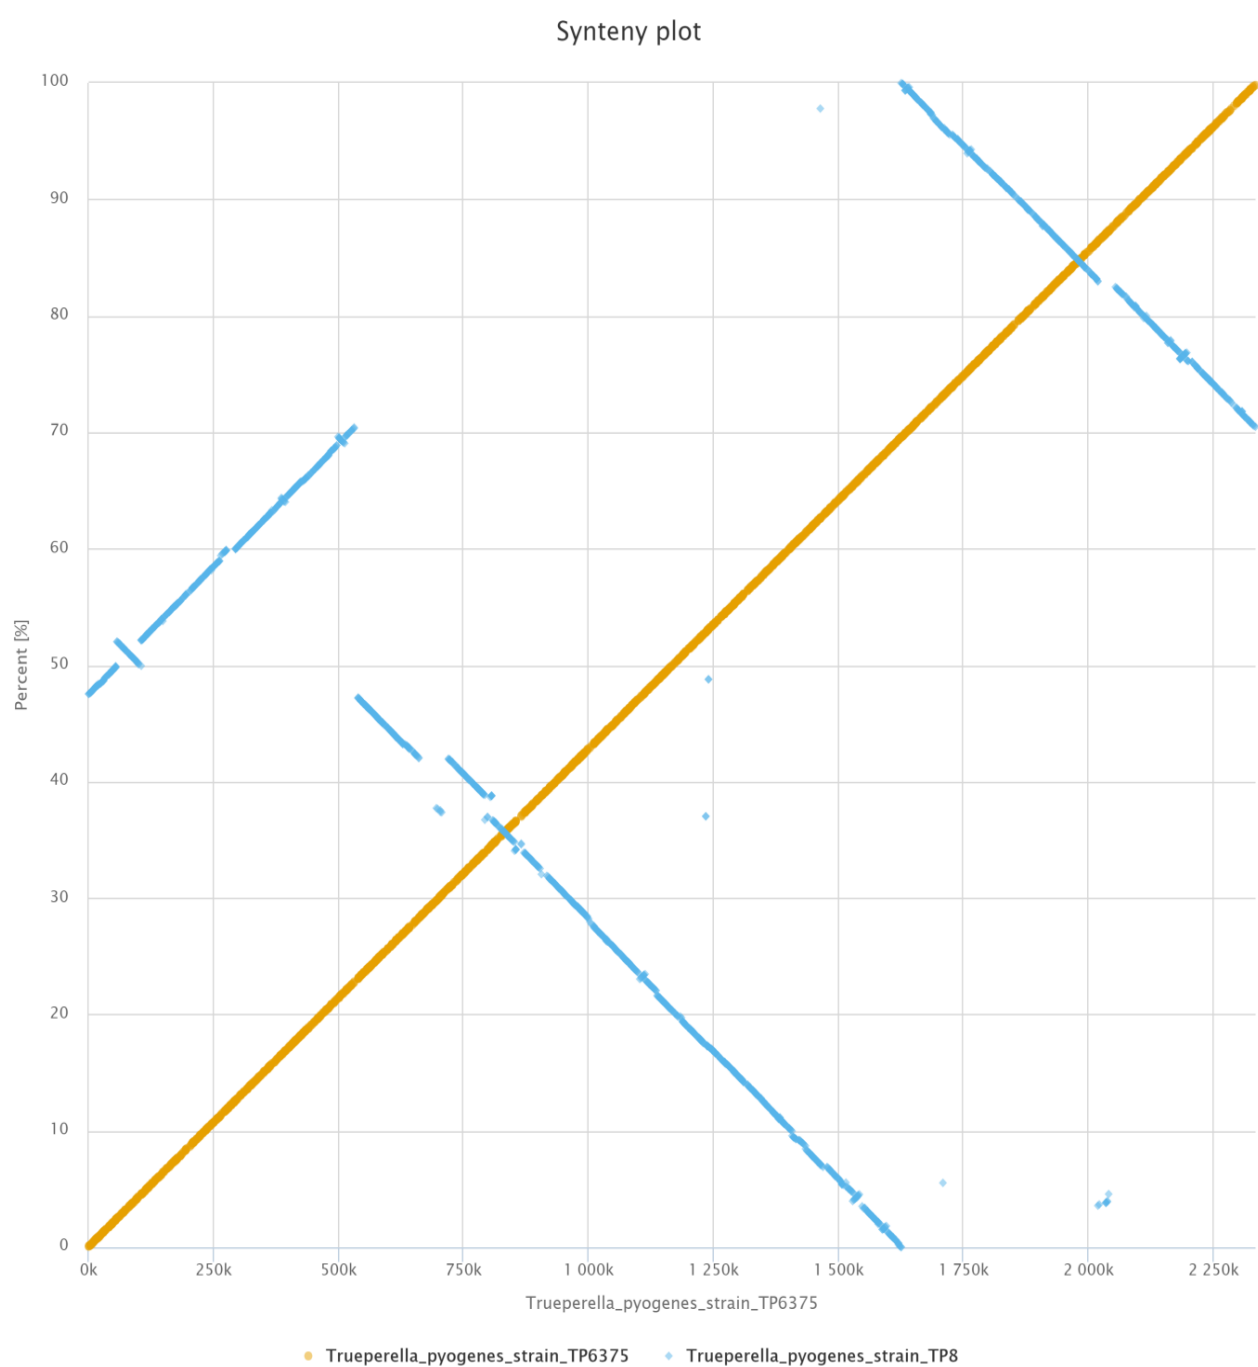

Highcharts.com

**Supplementary Figure 1 (h)** Synteny plot of *T. pyogenes* TP8 genome against *T. pyogenes* TP6375 genome.



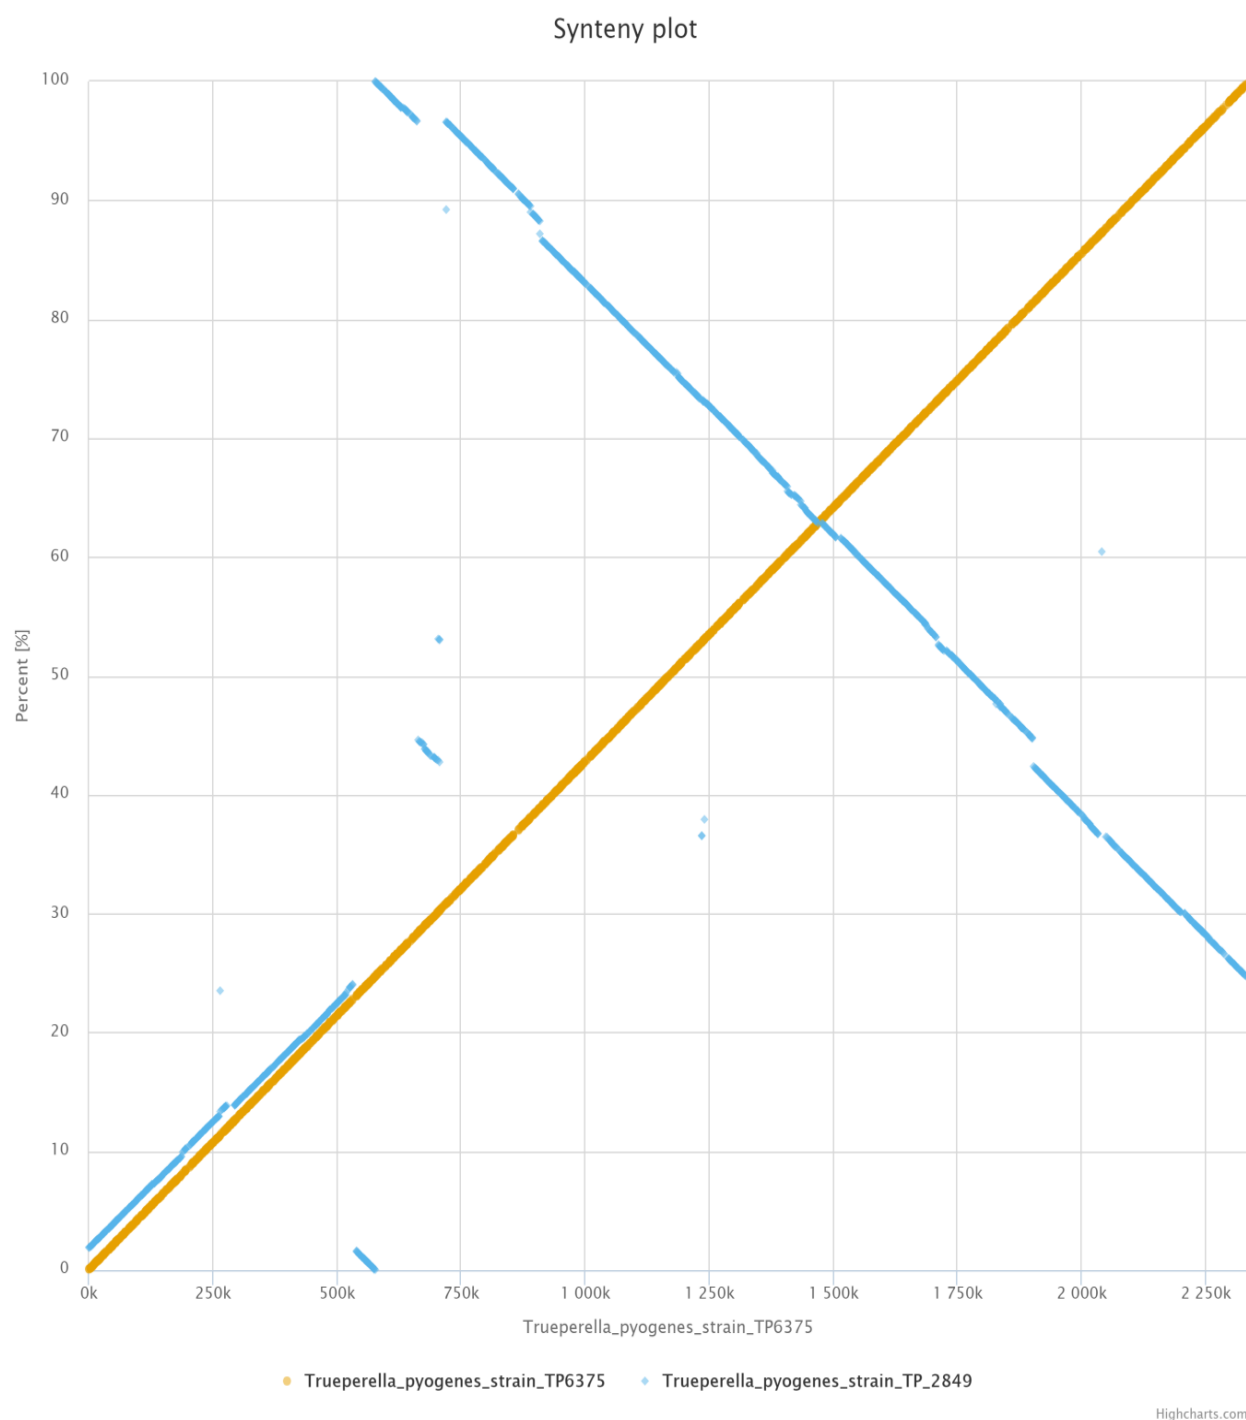

**Supplementary Figure 1 (i)** Synteny plot of *T. pyogenes* TP2849 genome against *T. pyogenes* TP6375 genome.

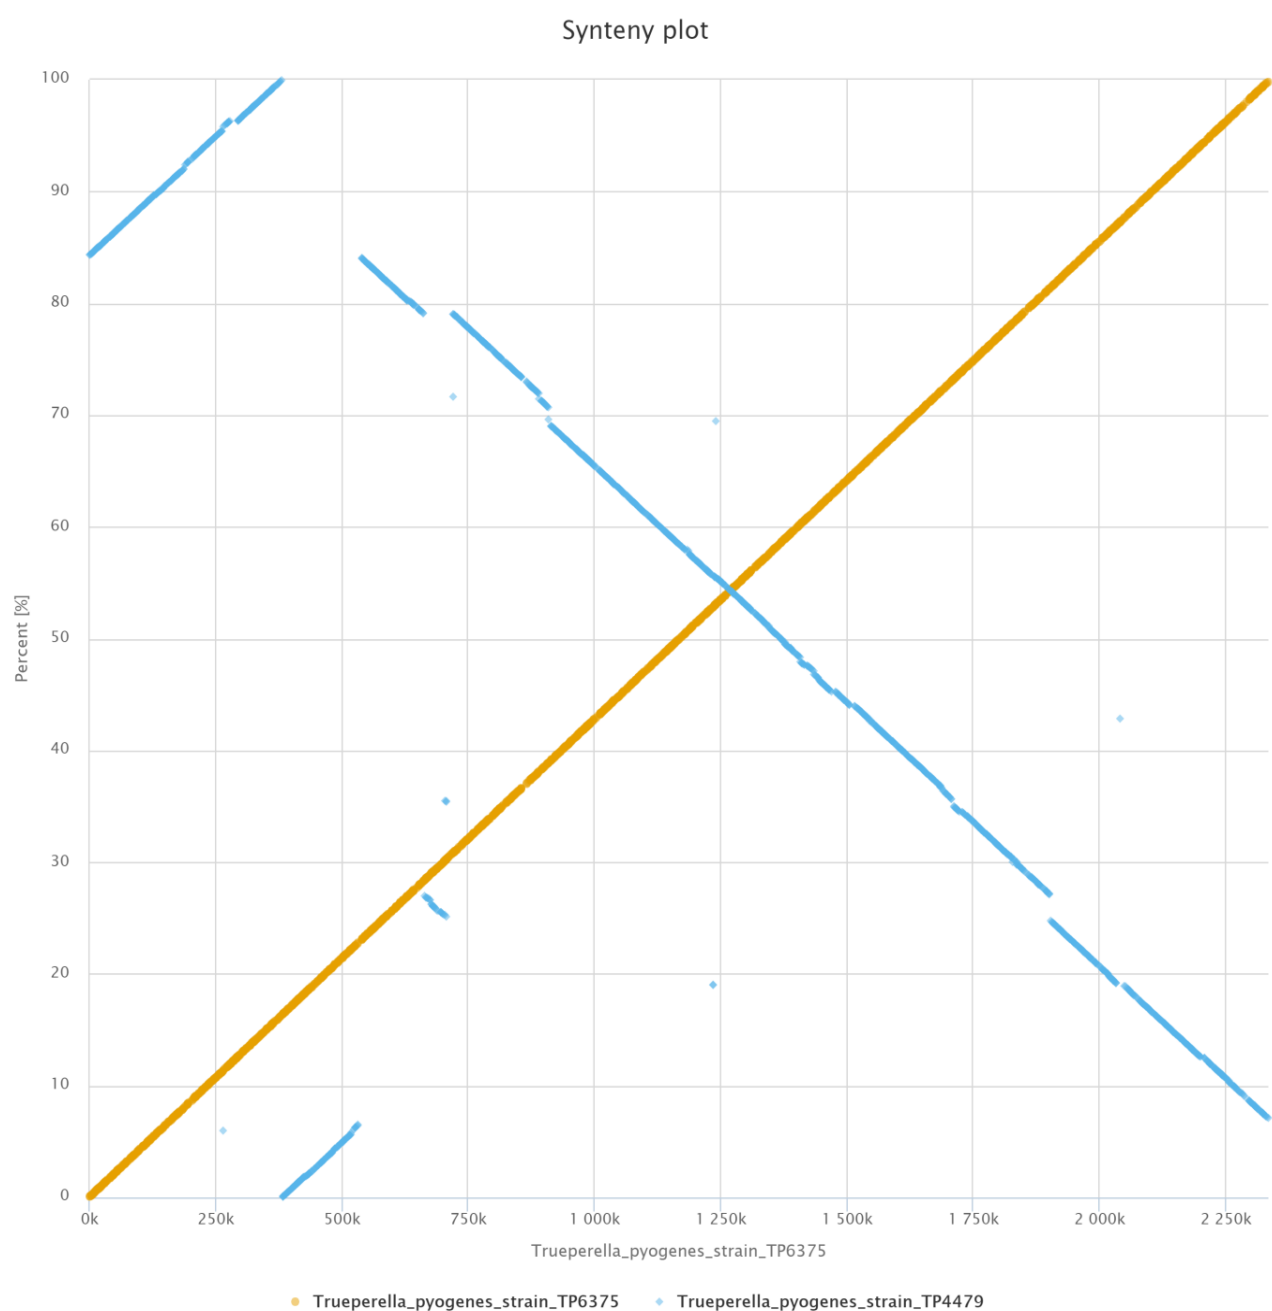

Highcharts.com

**Supplementary Figure 1 (j)** Synteny plot of *T. pyogenes* TP4479 genome against *T. pyogenes* TP6375 genome.
