# Supplementary material for: Comparative Genome Analysis of 19 Trueperella pyogenes Strains Originating from Different Animal Species Reveal a Genetically Diverse Open Pan-Genome
Source: Antibiotics (Basel). 2022 Dec 24;12(1):24. doi: 10.3390/antibiotics12010024 (PMC9854608; doi:10.3390/antibiotics12010024)
Supplement: Supplementary file 1 [file antibiotics-12-00024-s001.zip]

Archive with 13 entries (13 files):
- Figure S1 (a-j) Synteny plots.pdf
- Figure S2 (a-h) Virulence factors multisple sequence alignement.pdf
- Figure S3 ANI_MEAN300.pdf
- Table S1.pdf
- Table S10 AMR genes identified by CARD.xlsx
- Table S2.xlsx
- Table S3 .xlsx
- Table S4 Genes identified to be part of core genome of investigated genomes with their name and function.xlsx
- Table S5a-s_Singletons.xlsx
- Table S6a-b.xlsx
- Table S7a-c Putative virulence factors VFDB.xlsx
- Table S8a-s Genomic Islands identified by Island Viewer.xlsx
- Table S9 Prophages identified in T. pyogenes strains by PHASTER.xlsx
