# Supplementary material for: Comparative Genome Analysis of 19 Trueperella pyogenes Strains Originating from Different Animal Species Reveal a Genetically Diverse Open Pan-Genome
Source: Antibiotics (Basel). 2022 Dec 24;12(1):24. doi: 10.3390/antibiotics12010024 (PMC9854608; doi:10.3390/antibiotics12010024)
Supplement: Supplementary file 1 [file antibiotics-12-00024-s001.zip › Table S2.xlsx]

## Sheet: 2
Suppl Table 2a The table lists investigated T. pyogenes genomes with their geogrophical location, Status, Accesion No's and host name .
S.No	Genome Name	Isolation Country	Geographic Location	Genome Status	Strain	Assembly Accession	GenBank Accessions	Host Name	Comments
1	Trueperella pyogenes strain TP8	China	Sichuan, China	Complete	TP8	GCA_000816065.1	CP007003.1	Musk deer	we report the first complete genome sequence of T. pyogenes and provide eagerly-awaited information about the genetic features and virulence characteristics.
2	Trueperella pyogenes strain TP6375	United States	USA: New York	Complete	TP6375	GCF_000612055.1	CP007519	Cow, Bos taurus	Trueperella pyogenes is a gram positive, rod shaped, non-motile, non-spore forming facultative anaerobe and is a common inhabitant of the of the upper respiratory, urogenital, and gastrointestinal tracts of dairy and beef cattle. T. pyogenes can also act as an opportunistic pathogen and has been implicated in a multitude of diseases including; multi organ abscess formation, mastitis, metritis, en…
3	Trueperella pyogenes strain 2012CQ-ZSH	China	China:chongqing	Complete	2012CQ-ZSH	GCF_001281085.1	CP012649	Goat, Capra hircus	To identify the pathogenic mechanism of T. pyogenes 2012CQ-ZSH and study the potential vaccine candidate.
4	Trueperella pyogenes strain TP4479	China	China: Changchun	Complete	TP4479	GCA_003076295.1	CP029001	Pig, Sus scrofa	Trueperella pyogenes is an opportunistic pathogen of many animal species.
5	Trueperella pyogenes strain TP-2849	China	China: Changchun	Complete	TP-2849	GCA_003076315.1	CP029004	Pig, Sus scrofa	Trueperella pyogenes isolated from swine
6	Trueperella pyogenes strain Arash114	Iran	Iran: Tehran	Complete	Arash114	GCA_003055835.1	CP028833	Water Buffalo	Genotyping characterization of Trueperella pyogenes strain as a major causative agent metritis, abortion and death in Bubalus bubalis
7	Trueperella pyogenes strain TP1	China	China: Changchun	Complete	TP1	GCA_003971445.1	CP033902	Cow, Bos taurus	several Trueperella pyogenes speices assembly for further research
8	Trueperella pyogenes strain TP2	China	China: Changchun	Complete	TP2	GCA_003971465.1	CP033903	Cow, Bos taurus	several Trueperella pyogenes speices assembly for further research
9	Trueperella pyogenes strain TP3	China	China: Changchun	Complete	TP3	GCA_003971485.1	CP033904	Pig, Sus scrofa	several Trueperella pyogenes speices assembly for further research
10	Trueperella pyogenes strain TP4	China	China: Changchun	Complete	TP4	GCA_003971545.1	CP033905	Pig, Sus scrofa	several Trueperella pyogenes speices assembly for further research
11	Trueperella pyogenes strain jx18	China	China:jiangxi	Complete	jx18	GCA_012109075.1	CP050810	Pig, Sus scrofa	For veterinary research
12	Trueperella pyogenes strain Bu5	India	India:Haryana, Hisar	WGS (18 contigs)	Bu5	GCA_002762575.1	PESV01000000	Water buffalo, Bubalus bubalis	Trueperella pyogenes is a Gram-positive opportunistic bacterium frequently isolated from a variety of pyogenic infections, mainly mastitis, pyometra, pneumonia, and abscesses in cattle, sheep, goats, pigs, horses etc. Recently it has been detected in uterus of pregnant cattle. It has been also considered to act as a primary uterine pathogen. Although T. pyogenes is associated with severe endometr…
13	Trueperella pyogenes MS249	United Kingdom	United Kingdom	WGS (149 contigs)	MS249	GCA_000599565.1	JALQ00000000	Cow, Bos taurus	Trueperella pyogenes sequencing project to elucidate the genomic structure of a causative agent of bovine metritis
14	Trueperella pyogenes strain UFV1	Brazil	Brazil	WGS (104 contigs)	UFV1	GCA_002071825.1	MVGS00000000	Cow, Bos taurus	The complete genome sequence of T. pyogenes UFV1, which will serve as a phage host and a new model in order to understand the role of quorum sensing in this species.
15	Trueperella pyogenes strain NCTC5224	-	-	WGS (5 Contigs)	NCTC5224	GCA_900460345.1	UHHW01000000	Pig, Sus scrofa	http://www.sanger.ac.uk/resources/downloads/bacteria/nctc/
16	Trueperella pyogenes strain SH02	China	China	WGS(45 contigs)	SH02	GCA_004009995.2	RSAH01000000	Pig, Sus scrofa	Genome Research
17	Trueperella pyogenes strain SH03	China	China: Shanghai	WGS (39 contigs)	SH03	GCA_004123715.1	RWKU01000000	Pig, Sus scrofa	analyze
18	Trueperella pyogenes strain SH01	China	China	WGS (48 contigs)	SH01	GCA_004564055.1	SPVE01000000	Pig, Sus scrofa	Pseudomonas pyogenes is a facultative anaerobic bacterium that requires a nutrient-rich medium for growth and proliferation. Incubation on blood agar for more than 40 hours produces visible colonies. The optimum growth temperature is 37 �C. The resulting colonies are transparent and have hemolysis around them, and the size is 1 mm.
19	Trueperella pyogenes strain DSM 20630	Unknown Origin	-	WGS (30 contigs)	DSM 20630	JACHWO010000000	JACHWO010000001,JACHWO010000002,JACHWO010000003,JACHWO010000004,JACHWO010000005,JACHWO010000006,JACHWO010000007	Pig, Sus scrofa	Sequencing of Actinobacteria genome as a plant growth promoter and producer of natural products and energy relevant enzymes
Suppl Table 2b The table lists sequence quality information of the investigated T. pyogenes strains.							Genome quality information provided by PATRIC
S.No	Genome Name	Sequencing Platform	Sequencing Depth	Assembly Method	Sequencing Centers	Isolation Source	Coarse Consistency	Fine Consistency	Checkm Completeness	Checkm Contamination	Genome Quality
1	Trueperella pyogenes strain TP8	454	15.0x	Newbler v. 2.6	Sichuan University, China		95.3	94.4	100	2.2	Good
2	Trueperella pyogenes strain TP6375	Illumina MiSeq	50.0x	DNASTAR SegMan NGen v. 11.2.1	Cornell University, USA	uterus	95.4	94.8	100		Good
3	Trueperella pyogenes strain 2012CQ-ZSH	Illumina HiSeq	100.0x	Velvet v. MAY-2015	veterinary institute	goat lung tissue	95.1	94.2	100		Good
4	Trueperella pyogenes strain Bu5	454	41.0x	Newbler v. 2.6	National Centre for Veterinary Type Cultures, NRCE, Sirsa Road, Hisar, India	pus sample from wound	95.5	94.8	100		Good
5	Trueperella pyogenes strain TP4479	Illumina MiSeq; PacBio	432.0x	AS-miseq v. v20150522; CANU v. v1.4	Jilin Agricultural University, China		95.3	94.5	100		Good
6	Trueperella pyogenes strain TP-2849	Illumina MiSeq; PacBio	432.0x	AS-miseq v. v20150522; CANU v. v1.4	Jilin Agricultural University, China	lung	95.3	94.4	100		Good
7	Trueperella pyogenes strain Arash114	Illumina	2338282.0x	clc v. 8.0	Faculty of veterinary sciences Bu-Ali Sina university Hamedan, Hanedan,Iran	Uterus	95.3	94.6	100		Good
8	Trueperella pyogenes strain TP1	PacBio RSII	400.0x	CANU v. 1.2	Jilin Agricultural University	lung	96.5	95.9			Good
9	Trueperella pyogens strain TP2	PacBio RSII	450.0x	CANU v. 1.2	Jilin Agricultural University	knee joint	96.5	96			Good
10	Trueperella pyogenes strain TP3	PacBio RSII	379.0x	CANU v. 1.2	Jilin Agricultural University	lung	96.1	95.3			Good
11	Trueperella pyogenes strain TP4	PacBio RSII	428.0x	CANU v. 1.2	Jilin Agricultural University	lung	96.1	95.4			Good
12	Trueperella pyogenes strain jx18	ONT	2758.69x	canu v. nanopore raw; pilon v. default;	Jiangxi academy of agricultural sciences	lungs	94.9	93.9			Good
13	Trueperella pyogenes strain MS249	Illumina	40.0x	Velvet v. 14th Dec 2011	iPUD	uterus of a cow with metritis	95	94.4	99.5		Good
14	Trueperella pyogenes strain UFV1					Uterus	95.3	91.4	100	15.9	Good
15	Trueperella pyogenes strain NCTC5224				SC		96.1	95	100	3.5	Good
16	Trueperella pyogenes strain SH02	Illumina HiSeq	1192.0x	SOAPdenovo v. 2014	SHANGHAI VETERINARY RESEARCH INSTITUTE CHINESE ACADEMY OF AGRICULTURAL SCIENCES	lung	95.9	95.3			Good
17	Trueperella pyogenes strain SH03	Illumina HiSeq	677.0x	SOAPdenovo v. 2016	SHANGHAI VETERINARY RESEARCH INSTITUTE CHINESE ACADEMY OF AGRICULTURAL SCIENCES	lung	96.2	95.7			Good
18	Trueperella pyogenes strain SH01	Illumina HiSeq	1192.0x	SOAPdenovo v. 2014	SHANGHAI VETERINARY RESEARCH INSTITUTE CHINESE ACADEMY OF AGRICULTURAL SCIENCES	lung	95.9	95.3			Good
19	Trueperella pyogenes strain DSM 20630	PacBio	1009.0x	HGAP v. smrtlink/6.0.0.47835, HGAP 4	DOE Joint Genome Institute, USA		93.6	91.6			Good
