# Supplementary material for: Comparative Genome Analysis of 19 Trueperella pyogenes Strains Originating from Different Animal Species Reveal a Genetically Diverse Open Pan-Genome
Source: Antibiotics (Basel). 2022 Dec 24;12(1):24. doi: 10.3390/antibiotics12010024 (PMC9854608; doi:10.3390/antibiotics12010024)
Supplement: Supplementary file 1 [file antibiotics-12-00024-s001.zip › Table S3 .xlsx]

## Sheet: Sheet1
Suppl 3 : The table lists genes identified to be part of Pan genome of investigated T. pyogenes genomes with their accession number and function.
S.No	Trueperella_pyogenes_strain_TP6375	Trueperella_pyogenes_strain_2012CQ_ZSH	Trueperella_pyogenes_strain_Arash114	Trueperella_pyogenes_strain_Bu5	Trueperella_pyogenes_strain_DSM_20630	Trueperella_pyogenes_strain_MS249	Trueperella_pyogenes_strain_NCTC5224	Trueperella_pyogenes_strain_SH01	Trueperella_pyogenes_strain_SH02	Trueperella_pyogenes_strain_SH03	Trueperella_pyogenes_strain_TP1	Trueperella_pyogenes_strain_TP2	Trueperella_pyogenes_strain_TP3	Trueperella_pyogenes_strain_TP4	Trueperella_pyogenes_strain_TP4479	Trueperella_pyogenes_strain_TP8	Trueperella_pyogenes_strain_TP_2849	Trueperella_pyogenes_strain_UFV1	Trueperella_pyogenes_strain_jx18
1	TP6375_00010, ,psos,hypothetical protein	- , -	Arash114_00010, ,psos,hypothetical protein	Bu5_05795, ,psos,hypothetical protein	- , -	- , -	- , -	SH01_08950, ,psos,hypothetical protein	SH02_05475, ,psos,hypothetical protein	SH03_00005, ,psos,hypothetical protein	TP1_03855, ,psos,hypothetical protein	- , -	TP3_02820, ,psos,hypothetical protein	TP4_01825, ,psos,hypothetical protein	TP4479_09165, ,psos,hypothetical protein	TP8_05170, ,psos,hypothetical protein	TP_2849_00225, ,psos,hypothetical protein	UFV1_04090, ,psos,hypothetical protein	- , -
2	TP6375_00015, ,psos,hypothetical protein	2012CQ_ZSH_07690, ,psos,hypothetical protein	Arash114_00015, ,psos,hypothetical protein	Bu5_05790, ,psos,hypothetical protein	DSM_20630_02295, ,psos,hypothetical protein	MS249_01585, ,psos,hypothetical protein	NCTC5224_04690, ,psos,hypothetical protein	- , -	SH02_05480, ,psos,hypothetical protein	- , -	TP1_03850, ,psos,hypothetical protein	TP2_09845, ,psos,hypothetical protein	TP3_02825, ,psos,hypothetical protein	TP4_01820, ,psos,hypothetical protein	TP4479_09170, ,psos,hypothetical protein	TP8_05175, ,psos,hypothetical protein	TP_2849_00230, ,psos,hypothetical protein	UFV1_04095, ,psos,hypothetical protein	jx18_03600, ,psos,hypothetical protein
3	TP6375_00020, ,psos,Uncharacterized hydrolase yutF	2012CQ_ZSH_07695, ,psos,Uncharacterized hydrolase yutF	Arash114_00020, ,psos,Uncharacterized hydrolase yutF	Bu5_05785, ,psos,Uncharacterized hydrolase yutF	DSM_20630_02300, ,psos,Uncharacterized hydrolase yutF	MS249_01590, ,psos,Uncharacterized hydrolase yutF	NCTC5224_04695, ,psos,Uncharacterized hydrolase yutF	SH01_08960, ,psos,Uncharacterized hydrolase yutF	SH02_05485, ,psos,Uncharacterized hydrolase yutF	SH03_00015, ,psos,Uncharacterized hydrolase yutF	TP1_03845, ,psos,Uncharacterized hydrolase yutF	TP2_09840, ,psos,Uncharacterized hydrolase yutF	TP3_02830, ,psos,Uncharacterized hydrolase yutF	TP4_01815, ,psos,Uncharacterized hydrolase yutF	TP4479_09175, ,psos,Uncharacterized hydrolase yutF	TP8_05180, ,psos,Uncharacterized hydrolase yutF	TP_2849_00235, ,psos,Uncharacterized hydrolase yutF	UFV1_04100, ,psos,Uncharacterized hydrolase yutF	jx18_03595, ,psos,Uncharacterized hydrolase yutF
4	TP6375_00025, ,psos,hypothetical protein	2012CQ_ZSH_07700, ,psos,hypothetical protein	Arash114_00025, ,psos,hypothetical protein	Bu5_05780, ,psos,hypothetical protein	DSM_20630_02305, ,psos,hypothetical protein	MS249_01595, ,psos,hypothetical protein	NCTC5224_04700, ,psos,hypothetical protein	SH01_08965, ,psos,hypothetical protein	SH02_05490, ,psos,hypothetical protein	SH03_00020, ,psos,hypothetical protein	TP1_03840, ,psos,hypothetical protein	TP2_09835, ,psos,hypothetical protein	TP3_02835, ,psos,hypothetical protein	TP4_01810, ,psos,hypothetical protein	TP4479_09180, ,psos,hypothetical protein	TP8_05185, ,psos,hypothetical protein	TP_2849_00240, ,psos,hypothetical protein	UFV1_04105, ,psos,hypothetical protein	jx18_03590, ,psos,hypothetical protein
5	TP6375_00030, ,psos,16S/23S rRNA (Cytidine-2-O)-methyltransferase TlyA	2012CQ_ZSH_07705, ,psos,16S/23S rRNA (Cytidine-2-O)-methyltransferase TlyA	Arash114_00030, ,psos,16S/23S rRNA (Cytidine-2-O)-methyltransferase TlyA	Bu5_05775, ,psos,16S/23S rRNA (Cytidine-2-O)-methyltransferase TlyA	DSM_20630_02310, ,psos,16S/23S rRNA (Cytidine-2-O)-methyltransferase TlyA	MS249_01600, ,psos,16S/23S rRNA (Cytidine-2-O)-methyltransferase TlyA	NCTC5224_04705, ,psos,16S/23S rRNA (Cytidine-2-O)-methyltransferase TlyA	SH01_08970, ,psos,16S/23S rRNA (Cytidine-2-O)-methyltransferase TlyA	SH02_05495, ,psos,16S/23S rRNA (Cytidine-2-O)-methyltransferase TlyA	SH03_00025, ,psos,16S/23S rRNA (Cytidine-2-O)-methyltransferase TlyA	TP1_03835, ,psos,16S/23S rRNA (Cytidine-2-O)-methyltransferase TlyA	TP2_09830, ,psos,16S/23S rRNA (Cytidine-2-O)-methyltransferase TlyA	TP3_02840, ,psos,16S/23S rRNA (Cytidine-2-O)-methyltransferase TlyA	TP4_01805, ,psos,16S/23S rRNA (Cytidine-2-O)-methyltransferase TlyA	TP4479_09185, ,psos,16S/23S rRNA (Cytidine-2-O)-methyltransferase TlyA	TP8_05190, ,psos,16S/23S rRNA (Cytidine-2-O)-methyltransferase TlyA	TP_2849_00245, ,psos,16S/23S rRNA (Cytidine-2-O)-methyltransferase TlyA	UFV1_04110, ,psos,16S/23S rRNA (Cytidine-2-O)-methyltransferase TlyA	jx18_03585, ,psos,16S/23S rRNA (Cytidine-2-O)-methyltransferase TlyA
6	TP6375_00035, ,psos,NAD kinase	2012CQ_ZSH_07710, ,psos,NAD kinase	Arash114_00035, ,psos,NAD kinase	Bu5_05770, ,psos,NAD kinase	DSM_20630_02315, ,psos,NAD kinase	MS249_01605, ,psos,NAD kinase	NCTC5224_04710, ,psos,NAD kinase	SH01_08975, ,psos,NAD kinase	SH02_05500, ,psos,NAD kinase	SH03_00030, ,psos,NAD kinase	TP1_03830, ,psos,NAD kinase	TP2_09825, ,psos,NAD kinase	TP3_02845, ,psos,NAD kinase	TP4_01800, ,psos,NAD kinase	TP4479_09190, ,psos,NAD kinase	TP8_05195, ,psos,NAD kinase	TP_2849_00250, ,psos,NAD kinase	UFV1_04115, ,psos,NAD kinase	jx18_03580, ,psos,NAD kinase
7	TP6375_00040, ,psos,DNA repair protein RecN	2012CQ_ZSH_07715, ,psos,DNA repair protein RecN	Arash114_00040, ,psos,DNA repair protein RecN	Bu5_05765, ,psos,DNA repair protein RecN	DSM_20630_02320, ,psos,DNA repair protein RecN	MS249_01610, ,psos,DNA repair protein RecN	NCTC5224_04715, ,psos,DNA repair protein RecN	SH01_08980, ,psos,DNA repair protein RecN	SH02_05505, ,psos,DNA repair protein RecN	SH03_00035, ,psos,DNA repair protein RecN	TP1_03825, ,psos,DNA repair protein RecN	TP2_09820, ,psos,DNA repair protein RecN	TP3_02850, ,psos,DNA repair protein RecN	TP4_01795, ,psos,DNA repair protein RecN	TP4479_09195, ,psos,DNA repair protein RecN	TP8_05200, ,psos,DNA repair protein RecN	TP_2849_00255, ,psos,DNA repair protein RecN	UFV1_04120, ,psos,DNA repair protein RecN	jx18_03575, ,psos,DNA repair protein RecN
8	TP6375_00045, ,psos,TPPK_C domain-containing protein	2012CQ_ZSH_07720, ,psos,TPPK_C domain-containing protein	Arash114_00045, ,psos,TPPK_C domain-containing protein	Bu5_05760, ,psos,TPPK_C domain-containing protein	DSM_20630_02325, ,psos,TPPK_C domain-containing protein	MS249_01615, ,psos,TPPK_C domain-containing protein	NCTC5224_04720, ,psos,TPPK_C domain-containing protein	SH01_08985, ,psos,TPPK_C domain-containing protein	SH02_05510, ,psos,TPPK_C domain-containing protein	SH03_00040, ,psos,TPPK_C domain-containing protein	TP1_03820, ,psos,TPPK_C domain-containing protein	TP2_09815, ,psos,TPPK_C domain-containing protein	TP3_02855, ,psos,TPPK_C domain-containing protein	TP4_01790, ,psos,TPPK_C domain-containing protein	TP4479_09200, ,psos,TPPK_C domain-containing protein	TP8_05205, ,psos,TPPK_C domain-containing protein	TP_2849_00260, ,psos,TPPK_C domain-containing protein	UFV1_04125, ,psos,TPPK_C domain-containing protein	jx18_03570, ,psos,TPPK_C domain-containing protein
9	TP6375_00050, ,psos,Copper transporter	2012CQ_ZSH_07725, ,psos,Copper transporter	Arash114_00050, ,psos,Copper transporter	Bu5_05755, ,psos,Copper transporter	DSM_20630_02330, ,psos,Copper transporter	MS249_01620, ,psos,Copper transporter	NCTC5224_04725, ,psos,Copper transporter	SH01_08990, ,psos,Copper transporter	SH02_05515, ,psos,Copper transporter	SH03_00045, ,psos,Copper transporter	TP1_03815, ,psos,Copper transporter	TP2_09810, ,psos,Copper transporter	TP3_02860, ,psos,Copper transporter	TP4_01785, ,psos,Copper transporter	TP4479_09205, ,psos,Copper transporter	TP8_05210, ,psos,Copper transporter	TP_2849_00265, ,psos,Copper transporter	UFV1_04130, ,psos,Copper transporter	jx18_03565, ,psos,Copper transporter
10	TP6375_00055, ,psos,hypothetical protein	2012CQ_ZSH_07730, ,psos,hypothetical protein	Arash114_00055, ,psos,hypothetical protein	Bu5_05750, ,psos,hypothetical protein	DSM_20630_02335, ,psos,hypothetical protein	MS249_01625, ,psos,hypothetical protein	NCTC5224_04730, ,psos,hypothetical protein	SH01_08995, ,psos,hypothetical protein	SH02_05520, ,psos,hypothetical protein	SH03_00050, ,psos,hypothetical protein	TP1_03810, ,psos,hypothetical protein	TP2_09805, ,psos,hypothetical protein	TP3_02865, ,psos,hypothetical protein	TP4_01780, ,psos,hypothetical protein	TP4479_09210, ,psos,hypothetical protein	TP8_05215, ,psos,hypothetical protein	TP_2849_00270, ,psos,hypothetical protein	UFV1_04135, ,psos,hypothetical protein	jx18_03560, ,psos,hypothetical protein
11	TP6375_00060, ,psos,Integral membrane protein MviN	2012CQ_ZSH_07735, ,psos,Integral membrane protein MviN	Arash114_00060, ,psos,Integral membrane protein MviN	Bu5_05745, ,psos,Integral membrane protein MviN	DSM_20630_02340, ,psos,Integral membrane protein MviN	MS249_01630, ,psos,Integral membrane protein MviN	NCTC5224_04735, ,psos,Integral membrane protein MviN	SH01_09000, ,psos,Integral membrane protein MviN	SH02_05525, ,psos,Integral membrane protein MviN	SH03_00055, ,psos,Integral membrane protein MviN	TP1_03805, ,psos,Integral membrane protein MviN	TP2_09800, ,psos,Integral membrane protein MviN	TP3_02870, ,psos,Integral membrane protein MviN	TP4_01775, ,psos,Integral membrane protein MviN	TP4479_09215, ,psos,Integral membrane protein MviN	TP8_05220, ,psos,Integral membrane protein MviN	TP_2849_00275, ,psos,Integral membrane protein MviN	UFV1_04140, ,psos,Integral membrane protein MviN	jx18_03555, ,psos,Integral membrane protein MviN
12	TP6375_00065, ,psos,ADP-ribose pyrophosphatase	2012CQ_ZSH_07740, ,psos,ADP-ribose pyrophosphatase	Arash114_00065, ,psos,ADP-ribose pyrophosphatase	Bu5_05740, ,psos,ADP-ribose pyrophosphatase	DSM_20630_02345, ,psos,ADP-ribose pyrophosphatase	MS249_01635, ,psos,ADP-ribose pyrophosphatase	NCTC5224_04740, ,psos,ADP-ribose pyrophosphatase	SH01_09005, ,psos,ADP-ribose pyrophosphatase	SH02_05530, ,psos,ADP-ribose pyrophosphatase	SH03_00060, ,psos,ADP-ribose pyrophosphatase	TP1_03800, ,psos,ADP-ribose pyrophosphatase	TP2_09795, ,psos,ADP-ribose pyrophosphatase	TP3_02875, ,psos,ADP-ribose pyrophosphatase	TP4_01770, ,psos,ADP-ribose pyrophosphatase	TP4479_09220, ,psos,ADP-ribose pyrophosphatase	TP8_05225, ,psos,ADP-ribose pyrophosphatase	TP_2849_00280, ,psos,ADP-ribose pyrophosphatase	UFV1_04145, ,psos,ADP-ribose pyrophosphatase	jx18_03550, ,psos,ADP-ribose pyrophosphatase
13	TP6375_00070, ,psos,Transcriptional regulator	2012CQ_ZSH_07745, ,psos,Transcriptional regulator	Arash114_00070, ,psos,Transcriptional regulator	Bu5_05735, ,psos,Transcriptional regulator	DSM_20630_02350, ,psos,Transcriptional regulator	MS249_01640, ,psos,Transcriptional regulator	NCTC5224_04745, ,psos,Transcriptional regulator	SH01_09010, ,psos,Transcriptional regulator	SH02_05535, ,psos,Transcriptional regulator	SH03_00065, ,psos,Transcriptional regulator	TP1_03795, ,psos,Transcriptional regulator	TP2_09790, ,psos,Transcriptional regulator	TP3_02880, ,psos,Transcriptional regulator	TP4_01765, ,psos,Transcriptional regulator	TP4479_09225, ,psos,Transcriptional regulator	TP8_05230, ,psos,Transcriptional regulator	TP_2849_00285, ,psos,Transcriptional regulator	UFV1_04150, ,psos,Transcriptional regulator	jx18_03545, ,psos,Transcriptional regulator
14	TP6375_00075, ,psos,Cysteine desulfurase activator complex subunit SufB	2012CQ_ZSH_07750, ,psos,Cysteine desulfurase activator complex subunit SufB	Arash114_00075, ,psos,Cysteine desulfurase activator complex subunit SufB	Bu5_05730, ,psos,Cysteine desulfurase activator complex subunit SufB	DSM_20630_02355, ,psos,Cysteine desulfurase activator complex subunit SufB	MS249_01645, ,psos,Cysteine desulfurase activator complex subunit SufB	NCTC5224_04750, ,psos,Cysteine desulfurase activator complex subunit SufB	SH01_09015, ,psos,Cysteine desulfurase activator complex subunit SufB	SH02_05540, ,psos,Cysteine desulfurase activator complex subunit SufB	SH03_00070, ,psos,Cysteine desulfurase activator complex subunit SufB	TP1_03790, ,psos,Cysteine desulfurase activator complex subunit SufB	TP2_09785, ,psos,Cysteine desulfurase activator complex subunit SufB	TP3_02885, ,psos,Cysteine desulfurase activator complex subunit SufB	TP4_01760, ,psos,Cysteine desulfurase activator complex subunit SufB	TP4479_09230, ,psos,Cysteine desulfurase activator complex subunit SufB	TP8_05235, ,psos,Cysteine desulfurase activator complex subunit SufB	TP_2849_00290, ,psos,Cysteine desulfurase activator complex subunit SufB	UFV1_04155, ,psos,Cysteine desulfurase activator complex subunit SufB	jx18_03540, ,psos,Cysteine desulfurase activator complex subunit SufB
15	TP6375_00080, ,psos,Fe-S cluster assembly protein SufD	2012CQ_ZSH_07755, ,psos,Fe-S cluster assembly protein SufD	Arash114_00080, ,psos,Fe-S cluster assembly protein SufD	Bu5_05725, ,psos,Fe-S cluster assembly protein SufD	DSM_20630_02360, ,psos,Fe-S cluster assembly protein SufD	MS249_01650, ,psos,Fe-S cluster assembly protein SufD	NCTC5224_04755, ,psos,Fe-S cluster assembly protein SufD	SH01_09020, ,psos,Fe-S cluster assembly protein SufD	SH02_05545, ,psos,Fe-S cluster assembly protein SufD	SH03_00075, ,psos,Fe-S cluster assembly protein SufD	TP1_03785, ,psos,Fe-S cluster assembly protein SufD	TP2_09780, ,psos,Fe-S cluster assembly protein SufD	TP3_02890, ,psos,Fe-S cluster assembly protein SufD	TP4_01755, ,psos,Fe-S cluster assembly protein SufD	TP4479_09235, ,psos,Fe-S cluster assembly protein SufD	TP8_05240, ,psos,Fe-S cluster assembly protein SufD	TP_2849_00295, ,psos,Fe-S cluster assembly protein SufD	UFV1_04160, ,psos,Fe-S cluster assembly protein SufD	jx18_03535, ,psos,Fe-S cluster assembly protein SufD
16	TP6375_00085, ,psos,Naphthalene 1,2-dioxygenase system ferredoxin subunit	2012CQ_ZSH_07760, ,psos,Naphthalene 1,2-dioxygenase system ferredoxin subunit	Arash114_00085, ,psos,Naphthalene 1,2-dioxygenase system ferredoxin subunit	Bu5_05720, ,psos,Naphthalene 1,2-dioxygenase system ferredoxin subunit	DSM_20630_02365, ,psos,Naphthalene 1,2-dioxygenase system ferredoxin subunit	MS249_01655, ,psos,Naphthalene 1,2-dioxygenase system ferredoxin subunit	NCTC5224_04760, ,psos,Naphthalene 1,2-dioxygenase system ferredoxin subunit	SH01_09025, ,psos,Naphthalene 1,2-dioxygenase system ferredoxin subunit	SH02_05550, ,psos,Naphthalene 1,2-dioxygenase system ferredoxin subunit	SH03_00080, ,psos,Naphthalene 1,2-dioxygenase system ferredoxin subunit	TP1_03780, ,psos,Naphthalene 1,2-dioxygenase system ferredoxin subunit	TP2_09775, ,psos,Naphthalene 1,2-dioxygenase system ferredoxin subunit	TP3_02895, ,psos,Naphthalene 1,2-dioxygenase system ferredoxin subunit	TP4_01750, ,psos,Naphthalene 1,2-dioxygenase system ferredoxin subunit	TP4479_09240, ,psos,Naphthalene 1,2-dioxygenase system ferredoxin subunit	TP8_05245, ,psos,Naphthalene 1,2-dioxygenase system ferredoxin subunit	TP_2849_00300, ,psos,Naphthalene 1,2-dioxygenase system ferredoxin subunit	UFV1_04165, ,psos,Naphthalene 1,2-dioxygenase system ferredoxin subunit	jx18_03530, ,psos,Naphthalene 1,2-dioxygenase system ferredoxin subunit
17	TP6375_00090, ,psos,Fe-S cluster assembly ATPase SufC	2012CQ_ZSH_07765, ,psos,Fe-S cluster assembly ATPase SufC	Arash114_00090, ,psos,Fe-S cluster assembly ATPase SufC	Bu5_05715, ,psos,Fe-S cluster assembly ATPase SufC	DSM_20630_02370, ,psos,Fe-S cluster assembly ATPase SufC	MS249_01660, ,psos,Fe-S cluster assembly ATPase SufC	NCTC5224_04765, ,psos,Fe-S cluster assembly ATPase SufC	SH01_09030, ,psos,Fe-S cluster assembly ATPase SufC	SH02_05555, ,psos,Fe-S cluster assembly ATPase SufC	SH03_00085, ,psos,Fe-S cluster assembly ATPase SufC	TP1_03775, ,psos,Fe-S cluster assembly ATPase SufC	TP2_09770, ,psos,Fe-S cluster assembly ATPase SufC	TP3_02900, ,psos,Fe-S cluster assembly ATPase SufC	TP4_01745, ,psos,Fe-S cluster assembly ATPase SufC	TP4479_09245, ,psos,Fe-S cluster assembly ATPase SufC	TP8_05250, ,psos,Fe-S cluster assembly ATPase SufC	TP_2849_00305, ,psos,Fe-S cluster assembly ATPase SufC	UFV1_04170, ,psos,Fe-S cluster assembly ATPase SufC	jx18_03525, ,psos,Fe-S cluster assembly ATPase SufC
18	TP6375_00095, ,psos,Cysteine desulfurase	2012CQ_ZSH_07770, ,psos,Cysteine desulfurase	Arash114_00095, ,psos,Cysteine desulfurase	Bu5_05710, ,psos,Cysteine desulfurase	DSM_20630_02375, ,psos,Cysteine desulfurase	MS249_01665, ,psos,Cysteine desulfurase	NCTC5224_04770, ,psos,Cysteine desulfurase	SH01_09035, ,psos,Cysteine desulfurase	SH02_05560, ,psos,Cysteine desulfurase	SH03_00090, ,psos,Cysteine desulfurase	TP1_03770, ,psos,Cysteine desulfurase	TP2_09765, ,psos,Cysteine desulfurase	TP3_02905, ,psos,Cysteine desulfurase	TP4_01740, ,psos,Cysteine desulfurase	TP4479_09250, ,psos,Cysteine desulfurase	TP8_05255, ,psos,Cysteine desulfurase	TP_2849_00310, ,psos,Cysteine desulfurase	UFV1_04175, ,psos,Cysteine desulfurase	jx18_03520, ,psos,Cysteine desulfurase
19	TP6375_00100, ,psos,NifU-like protein	2012CQ_ZSH_07775, ,psos,NifU-like protein	Arash114_00100, ,psos,NifU-like protein	Bu5_05705, ,psos,NifU-like protein	DSM_20630_02380, ,psos,NifU-like protein	MS249_01670, ,psos,NifU-like protein	NCTC5224_04775, ,psos,NifU-like protein	SH01_09040, ,psos,NifU-like protein	SH02_05565, ,psos,NifU-like protein	SH03_00095, ,psos,NifU-like protein	TP1_03765, ,psos,NifU-like protein	TP2_09760, ,psos,NifU-like protein	TP3_02910, ,psos,NifU-like protein	TP4_01735, ,psos,NifU-like protein	TP4479_09255, ,psos,NifU-like protein	TP8_05260, ,psos,NifU-like protein	TP_2849_00315, ,psos,NifU-like protein	UFV1_04180, ,psos,NifU-like protein	jx18_03515, ,psos,NifU-like protein
20	TP6375_00105, ,psos,Metal-sulfur cluster assembly factor	2012CQ_ZSH_07780, ,psos,Metal-sulfur cluster assembly factor	Arash114_00105, ,psos,Metal-sulfur cluster assembly factor	Bu5_05700, ,psos,Metal-sulfur cluster assembly factor	DSM_20630_02385, ,psos,Metal-sulfur cluster assembly factor	MS249_01675, ,psos,Metal-sulfur cluster assembly factor	NCTC5224_04780, ,psos,Metal-sulfur cluster assembly factor	SH01_09045, ,psos,Metal-sulfur cluster assembly factor	SH02_05570, ,psos,Metal-sulfur cluster assembly factor	SH03_00100, ,psos,Metal-sulfur cluster assembly factor	TP1_03760, ,psos,Metal-sulfur cluster assembly factor	TP2_09755, ,psos,Metal-sulfur cluster assembly factor	TP3_02915, ,psos,Metal-sulfur cluster assembly factor	TP4_01730, ,psos,Metal-sulfur cluster assembly factor	TP4479_09260, ,psos,Metal-sulfur cluster assembly factor	TP8_05265, ,psos,Metal-sulfur cluster assembly factor	TP_2849_00320, ,psos,Metal-sulfur cluster assembly factor	UFV1_04185, ,psos,Metal-sulfur cluster assembly factor	jx18_03510, ,psos,Metal-sulfur cluster assembly factor
21	TP6375_00110, ,psos,Thiosulfate sulfurtransferase PspE	2012CQ_ZSH_07785, ,psos,Thiosulfate sulfurtransferase PspE	Arash114_00110, ,psos,Thiosulfate sulfurtransferase PspE	Bu5_05695, ,psos,Thiosulfate sulfurtransferase PspE	DSM_20630_02390, ,psos,Thiosulfate sulfurtransferase PspE	MS249_01680, ,psos,Thiosulfate sulfurtransferase PspE	NCTC5224_04785, ,psos,Thiosulfate sulfurtransferase PspE	SH01_09050, ,psos,Thiosulfate sulfurtransferase PspE	SH02_05575, ,psos,Thiosulfate sulfurtransferase PspE	SH03_00105, ,psos,Thiosulfate sulfurtransferase PspE	TP1_03755, ,psos,Thiosulfate sulfurtransferase PspE	TP2_09750, ,psos,Thiosulfate sulfurtransferase PspE	TP3_02920, ,psos,Thiosulfate sulfurtransferase PspE	TP4_01725, ,psos,Thiosulfate sulfurtransferase PspE	TP4479_09265, ,psos,Thiosulfate sulfurtransferase PspE	TP8_05270, ,psos,Thiosulfate sulfurtransferase PspE	TP_2849_00325, ,psos,Thiosulfate sulfurtransferase PspE	UFV1_04190, ,psos,Thiosulfate sulfurtransferase PspE	jx18_03505, ,psos,Thiosulfate sulfurtransferase PspE
22	TP6375_00115, ,psos,Putative ABC transporter ATP-binding protein YheS	2012CQ_ZSH_07790, ,psos,Putative ABC transporter ATP-binding protein YheS	Arash114_00115, ,psos,Putative ABC transporter ATP-binding protein YheS	Bu5_05690, ,psos,Putative ABC transporter ATP-binding protein YheS	DSM_20630_02395, ,psos,Putative ABC transporter ATP-binding protein YheS	MS249_01685, ,psos,Putative ABC transporter ATP-binding protein YheS	NCTC5224_04790, ,psos,Putative ABC transporter ATP-binding protein YheS	SH01_09055, ,psos,Putative ABC transporter ATP-binding protein YheS	SH02_05580, ,psos,Putative ABC transporter ATP-binding protein YheS	SH03_00110, ,psos,Putative ABC transporter ATP-binding protein YheS	TP1_03750, ,psos,Putative ABC transporter ATP-binding protein YheS	TP2_09745, ,psos,Putative ABC transporter ATP-binding protein YheS	TP3_02925, ,psos,Putative ABC transporter ATP-binding protein YheS	TP4_01720, ,psos,Putative ABC transporter ATP-binding protein YheS	TP4479_09270, ,psos,Putative ABC transporter ATP-binding protein YheS	TP8_05275, ,psos,Putative ABC transporter ATP-binding protein YheS	TP_2849_00330, ,psos,Putative ABC transporter ATP-binding protein YheS	UFV1_04195, ,psos,Putative ABC transporter ATP-binding protein YheS	jx18_03500, ,psos,Putative ABC transporter ATP-binding protein YheS
23	TP6375_00120, ,psos,Phosphohistidine phosphatase SixA	2012CQ_ZSH_07795, ,psos,Phosphohistidine phosphatase SixA	Arash114_00120, ,psos,Phosphohistidine phosphatase SixA	Bu5_05685, ,psos,Phosphohistidine phosphatase SixA	DSM_20630_02400, ,psos,Phosphohistidine phosphatase SixA	MS249_01690, ,psos,Phosphohistidine phosphatase SixA	NCTC5224_04795, ,psos,Phosphohistidine phosphatase SixA	SH01_09060, ,psos,Phosphohistidine phosphatase SixA	SH02_05585, ,psos,Phosphohistidine phosphatase SixA	SH03_00115, ,psos,Phosphohistidine phosphatase SixA	TP1_03745, ,psos,Phosphohistidine phosphatase SixA	TP2_09740, ,psos,Phosphohistidine phosphatase SixA	TP3_02930, ,psos,Phosphohistidine phosphatase SixA	TP4_01715, ,psos,Phosphohistidine phosphatase SixA	TP4479_09275, ,psos,Phosphohistidine phosphatase SixA	TP8_05280, ,psos,Phosphohistidine phosphatase SixA	TP_2849_00335, ,psos,Phosphohistidine phosphatase SixA	UFV1_04200, ,psos,Phosphohistidine phosphatase SixA	jx18_03495, ,psos,Phosphohistidine phosphatase SixA
24	TP6375_00125, ,psos,Phosphoserine phosphatase	2012CQ_ZSH_07800, ,psos,Phosphoserine phosphatase	Arash114_00125, ,psos,Phosphoserine phosphatase	Bu5_05680, ,psos,Phosphoserine phosphatase	DSM_20630_02405, ,psos,Phosphoserine phosphatase	MS249_01695, ,psos,Phosphoserine phosphatase	NCTC5224_04800, ,psos,Phosphoserine phosphatase	SH01_09065, ,psos,Phosphoserine phosphatase	SH02_05590, ,psos,Phosphoserine phosphatase	SH03_00120, ,psos,Phosphoserine phosphatase	TP1_03740, ,psos,Phosphoserine phosphatase	TP2_09735, ,psos,Phosphoserine phosphatase	TP3_02935, ,psos,Phosphoserine phosphatase	TP4_01710, ,psos,Phosphoserine phosphatase	TP4479_09280, ,psos,Phosphoserine phosphatase	TP8_05285, ,psos,Phosphoserine phosphatase	TP_2849_00340, ,psos,Phosphoserine phosphatase	UFV1_04205, ,psos,Phosphoserine phosphatase	jx18_03490, ,psos,Phosphoserine phosphatase
25	TP6375_00130, ,psos,Bacteriocin (Lactococcin_972)	- , -	Arash114_00130, ,psos,Bacteriocin (Lactococcin_972)	- , -	- , -	- , -	- , -	- , -	- , -	- , -	- , -	- , -	- , -	- , -	- , -	- , -	- , -	UFV1_04210, ,psos,Bacteriocin (Lactococcin_972)	- , -
26	TP6375_00135, ,psos,hypothetical protein	- , -	Arash114_00135, ,psos,hypothetical protein	- , -	DSM_20630_02410, ,psos,Uncharacterized protein conserved in bacteria	MS249_01700, ,psos,hypothetical protein	NCTC5224_04805, ,psos,Uncharacterized protein conserved in bacteria	- , -	- , -	- , -	- , -	- , -	TP3_02940, ,psos,hypothetical protein	TP4_01705, ,psos,hypothetical protein	TP4479_09285, ,psos,hypothetical protein	- , -	TP_2849_00345, ,psos,hypothetical protein	UFV1_04215, ,psos,hypothetical protein	jx18_03485, ,psos,hypothetical protein
27	TP6375_00140, ,psos,hypothetical protein	2012CQ_ZSH_07805, ,psos,hypothetical protein	- , -	Bu5_05675, ,psos,hypothetical protein	- , -	- , -	- , -	SH01_09070, ,psos,hypothetical protein	SH02_05595, ,psos,hypothetical protein	SH03_00125, ,psos,hypothetical protein	TP1_03735, ,psos,hypothetical protein	TP2_09730, ,psos,hypothetical protein	- , -	- , -	- , -	TP8_05290, ,psos,hypothetical protein	- , -	UFV1_04220, ,psos,hypothetical protein	- , -
28	TP6375_00145, ,psos,Glucose-1-phosphate adenylyltransferase	2012CQ_ZSH_07810, ,psos,Glucose-1-phosphate adenylyltransferase	Arash114_00145, ,psos,Glucose-1-phosphate adenylyltransferase	Bu5_05670, ,psos,Glucose-1-phosphate adenylyltransferase	DSM_20630_02425, ,psos,Glucose-1-phosphate adenylyltransferase	MS249_01710, ,psos,Glucose-1-phosphate adenylyltransferase	NCTC5224_04820, ,psos,Glucose-1-phosphate adenylyltransferase	SH01_09075, ,psos,Glucose-1-phosphate adenylyltransferase	SH02_05600, ,psos,Glucose-1-phosphate adenylyltransferase	SH03_00130, ,psos,Glucose-1-phosphate adenylyltransferase	TP1_03730, ,psos,Glucose-1-phosphate adenylyltransferase	TP2_09725, ,psos,Glucose-1-phosphate adenylyltransferase	TP3_02950, ,psos,Glucose-1-phosphate adenylyltransferase	TP4_01695, ,psos,Glucose-1-phosphate adenylyltransferase	TP4479_09295, ,psos,Glucose-1-phosphate adenylyltransferase	TP8_05295, ,psos,Glucose-1-phosphate adenylyltransferase	TP_2849_00355, ,psos,Glucose-1-phosphate adenylyltransferase	UFV1_04225, ,psos,Glucose-1-phosphate adenylyltransferase	jx18_03475, ,psos,Glucose-1-phosphate adenylyltransferase
29	TP6375_00150, ,psos,Glycogen synthase	2012CQ_ZSH_07815, ,psos,Glycogen synthase	Arash114_00150, ,psos,Glycogen synthase	Bu5_05665, ,psos,Glycogen synthase	DSM_20630_02430, ,psos,Capsular glucan synthase	MS249_01715, ,psos,Glycogen synthase	NCTC5224_04825, ,psos,Capsular glucan synthase	SH01_09080, ,psos,Glycogen synthase	SH02_05605, ,psos,Glycogen synthase	SH03_00135, ,psos,Glycogen synthase	TP1_03725, ,psos,Glycogen synthase	TP2_09720, ,psos,Glycogen synthase	TP3_02955, ,psos,Glycogen synthase	TP4_01690, ,psos,Glycogen synthase	TP4479_09300, ,psos,Glycogen synthase	TP8_05300, ,psos,Glycogen synthase	TP_2849_00360, ,psos,Glycogen synthase	UFV1_04230, ,psos,Glycogen synthase	jx18_03470, ,psos,Glycogen synthase
30	TP6375_00155, ,psos,Hemin import ATP-binding protein HmuV	2012CQ_ZSH_07820, ,psos,Hemin import ATP-binding protein HmuV	Arash114_00155, ,psos,Hemin import ATP-binding protein HmuV	Bu5_05660, ,psos,Hemin import ATP-binding protein HmuV	DSM_20630_02435, ,psos,Hemin import ATP-binding protein HmuV	MS249_01720, ,psos,Hemin import ATP-binding protein HmuV	NCTC5224_04830, ,psos,Hemin import ATP-binding protein HmuV	SH01_09085, ,psos,Hemin import ATP-binding protein HmuV	SH02_05610, ,psos,Hemin import ATP-binding protein HmuV	SH03_00140, ,psos,Hemin import ATP-binding protein HmuV	TP1_03720, ,psos,Hemin import ATP-binding protein HmuV	TP2_09715, ,psos,Hemin import ATP-binding protein HmuV	TP3_02960, ,psos,Hemin import ATP-binding protein HmuV	TP4_01685, ,psos,Hemin import ATP-binding protein HmuV	TP4479_09305, ,psos,Hemin import ATP-binding protein HmuV	TP8_05305, ,psos,Hemin import ATP-binding protein HmuV	TP_2849_00365, ,psos,Hemin import ATP-binding protein HmuV	UFV1_04235, ,psos,Hemin import ATP-binding protein HmuV	jx18_03465, ,psos,Hemin import ATP-binding protein HmuV
31	TP6375_00160, ,psos,NfeD family protein	2012CQ_ZSH_07825, ,psos,NfeD family protein	Arash114_00160, ,psos,NfeD family protein	Bu5_05655, ,psos,NfeD family protein	DSM_20630_02440, ,psos,NfeD family protein	MS249_01725, ,psos,NfeD family protein	NCTC5224_04835, ,psos,NfeD family protein	SH01_09090, ,psos,NfeD family protein	SH02_05615, ,psos,NfeD family protein	SH03_00145, ,psos,NfeD family protein	TP1_03715, ,psos,NfeD family protein	TP2_09710, ,psos,NfeD family protein	TP3_02965, ,psos,NfeD family protein	TP4_01680, ,psos,NfeD family protein	TP4479_09310, ,psos,NfeD family protein	TP8_05310, ,psos,NfeD family protein	TP_2849_00370, ,psos,NfeD family protein	UFV1_04240, ,psos,NfeD family protein	jx18_03460, ,psos,NfeD family protein
32	TP6375_00165, ,psos,Modulator of FtsH protease HflK	2012CQ_ZSH_07830, ,psos,Modulator of FtsH protease HflK	Arash114_00165, ,psos,Modulator of FtsH protease HflK	Bu5_05650, ,psos,Modulator of FtsH protease HflK	DSM_20630_02445, ,psos,Modulator of FtsH protease HflK	MS249_01730, ,psos,Modulator of FtsH protease HflK	NCTC5224_04840, ,psos,Modulator of FtsH protease HflK	SH01_09095, ,psos,Modulator of FtsH protease HflK	SH02_05620, ,psos,Modulator of FtsH protease HflK	SH03_00150, ,psos,Modulator of FtsH protease HflK	TP1_03710, ,psos,Modulator of FtsH protease HflK	TP2_09705, ,psos,Modulator of FtsH protease HflK	TP3_02970, ,psos,Modulator of FtsH protease HflK	TP4_01675, ,psos,Modulator of FtsH protease HflK	TP4479_09315, ,psos,Modulator of FtsH protease HflK	TP8_05315, ,psos,Modulator of FtsH protease HflK	TP_2849_00375, ,psos,Modulator of FtsH protease HflK	UFV1_04245, ,psos,Modulator of FtsH protease HflK	jx18_03455, ,psos,Modulator of FtsH protease HflK
33	TP6375_00170, ,psos,TrmH family tRNA/rRNA methyltransferase	2012CQ_ZSH_07835, ,psos,TrmH family tRNA/rRNA methyltransferase	Arash114_00170, ,psos,TrmH family tRNA/rRNA methyltransferase	Bu5_05645, ,psos,TrmH family tRNA/rRNA methyltransferase	DSM_20630_02450, ,psos,TrmH family tRNA/rRNA methyltransferase	MS249_01735, ,psos,TrmH family tRNA/rRNA methyltransferase	NCTC5224_04845, ,psos,TrmH family tRNA/rRNA methyltransferase	SH01_09100, ,psos,TrmH family tRNA/rRNA methyltransferase	SH02_05625, ,psos,TrmH family tRNA/rRNA methyltransferase	SH03_00155, ,psos,TrmH family tRNA/rRNA methyltransferase	TP1_03705, ,psos,TrmH family tRNA/rRNA methyltransferase	TP2_09700, ,psos,TrmH family tRNA/rRNA methyltransferase	TP3_02975, ,psos,TrmH family tRNA/rRNA methyltransferase	TP4_01670, ,psos,TrmH family tRNA/rRNA methyltransferase	TP4479_09320, ,psos,TrmH family tRNA/rRNA methyltransferase	TP8_05320, ,psos,TrmH family tRNA/rRNA methyltransferase	TP_2849_00380, ,psos,TrmH family tRNA/rRNA methyltransferase	UFV1_04250, ,psos,TrmH family tRNA/rRNA methyltransferase	jx18_03450, ,psos,TrmH family tRNA/rRNA methyltransferase
34	TP6375_00175, ,psos,Helix-turn-helix	2012CQ_ZSH_07840, ,psos,Helix-turn-helix	Arash114_00175, ,psos,Helix-turn-helix	Bu5_05640, ,psos,Helix-turn-helix	DSM_20630_02455, ,psos,Helix-turn-helix	MS249_01740, ,psos,Helix-turn-helix	NCTC5224_04850, ,psos,Helix-turn-helix	SH01_09105, ,psos,Helix-turn-helix	SH02_05630, ,psos,Helix-turn-helix	SH03_00160, ,psos,Helix-turn-helix	TP1_03700, ,psos,Helix-turn-helix	TP2_09695, ,psos,Helix-turn-helix	TP3_02980, ,psos,Helix-turn-helix	TP4_01665, ,psos,Helix-turn-helix	TP4479_09325, ,psos,Helix-turn-helix	TP8_05325, ,psos,Helix-turn-helix	TP_2849_00385, ,psos,Helix-turn-helix	UFV1_04255, ,psos,Helix-turn-helix	jx18_03445, ,psos,Helix-turn-helix
35	TP6375_00180, ,psos,Procyclic acidic repetitive protein (PARP)	2012CQ_ZSH_07845, ,psos,Procyclic acidic repetitive protein (PARP)	Arash114_00180, ,psos,Procyclic acidic repetitive protein (PARP)	Bu5_05635, ,psos,Procyclic acidic repetitive protein (PARP)	DSM_20630_02460, ,psos,Procyclic acidic repetitive protein (PARP)	MS249_01745, ,psos,Procyclic acidic repetitive protein (PARP)	NCTC5224_04855, ,psos,Procyclic acidic repetitive protein (PARP)	SH01_09110, ,psos,Procyclic acidic repetitive protein (PARP)	SH02_05635, ,psos,Procyclic acidic repetitive protein (PARP)	SH03_00165, ,psos,Procyclic acidic repetitive protein (PARP)	TP1_03695, ,psos,Procyclic acidic repetitive protein (PARP)	TP2_09690, ,psos,Procyclic acidic repetitive protein (PARP)	TP3_02985, ,psos,Procyclic acidic repetitive protein (PARP)	TP4_01660, ,psos,Procyclic acidic repetitive protein (PARP)	TP4479_09330, ,psos,Procyclic acidic repetitive protein (PARP)	TP8_05345, ,psos,hypothetical protein	TP_2849_00390, ,psos,Procyclic acidic repetitive protein (PARP)	- , -	jx18_03440, ,psos,Procyclic acidic repetitive protein (PARP)
36	TP6375_00185, ,psos,Putative tRNA (cytidine(34)-2-O)-methyltransferase	2012CQ_ZSH_07850, ,psos,Putative tRNA (cytidine(34)-2-O)-methyltransferase	Arash114_00185, ,psos,Putative tRNA (cytidine(34)-2-O)-methyltransferase	Bu5_05630, ,psos,Putative tRNA (cytidine(34)-2-O)-methyltransferase	DSM_20630_02465, ,psos,Putative tRNA (cytidine(34)-2-O)-methyltransferase	MS249_01750, ,psos,Putative tRNA (cytidine(34)-2-O)-methyltransferase	NCTC5224_04860, ,psos,Putative tRNA (cytidine(34)-2-O)-methyltransferase	SH01_09115, ,psos,Putative tRNA (cytidine(34)-2-O)-methyltransferase	SH02_05640, ,psos,Putative tRNA (cytidine(34)-2-O)-methyltransferase	SH03_00170, ,psos,Putative tRNA (cytidine(34)-2-O)-methyltransferase	TP1_03690, ,psos,Putative tRNA (cytidine(34)-2-O)-methyltransferase	TP2_09685, ,psos,Putative tRNA (cytidine(34)-2-O)-methyltransferase	TP3_02990, ,psos,Putative tRNA (cytidine(34)-2-O)-methyltransferase	TP4_01655, ,psos,Putative tRNA (cytidine(34)-2-O)-methyltransferase	TP4479_09335, ,psos,Putative tRNA (cytidine(34)-2-O)-methyltransferase	TP8_05350, ,psos,Putative tRNA (cytidine(34)-2-O)-methyltransferase	TP_2849_00395, ,psos,Putative tRNA (cytidine(34)-2-O)-methyltransferase	UFV1_04025, ,psos,Putative tRNA (cytidine(34)-2-O)-methyltransferase	jx18_03435, ,psos,Putative tRNA (cytidine(34)-2-O)-methyltransferase
37	TP6375_00190, ,psos,Putative kinase inhibitor protein	2012CQ_ZSH_07855, ,psos,Putative kinase inhibitor protein	Arash114_00190, ,psos,Putative kinase inhibitor protein	Bu5_05625, ,psos,Putative kinase inhibitor protein	DSM_20630_02470, ,psos,Putative kinase inhibitor protein	MS249_01755, ,psos,Putative kinase inhibitor protein	NCTC5224_04865, ,psos,Putative kinase inhibitor protein	SH01_09120, ,psos,Putative kinase inhibitor protein	SH02_05645, ,psos,Putative kinase inhibitor protein	SH03_00175, ,psos,Putative kinase inhibitor protein	TP1_03685, ,psos,Putative kinase inhibitor protein	TP2_09680, ,psos,Putative kinase inhibitor protein	TP3_02995, ,psos,Putative kinase inhibitor protein	TP4_01650, ,psos,Putative kinase inhibitor protein	TP4479_09340, ,psos,Putative kinase inhibitor protein	TP8_05355, ,psos,Putative kinase inhibitor protein	TP_2849_00400, ,psos,Putative kinase inhibitor protein	UFV1_04030, ,psos,Putative kinase inhibitor protein	jx18_03430, ,psos,Putative kinase inhibitor protein
38	TP6375_00195, ,psos,hypothetical protein	2012CQ_ZSH_07860, ,psos,hypothetical protein	Arash114_00195, ,psos,hypothetical protein	Bu5_05620, ,psos,hypothetical protein	DSM_20630_02475, ,psos,hypothetical protein	MS249_01760, ,psos,hypothetical protein	NCTC5224_04870, ,psos,hypothetical protein	SH01_09125, ,psos,hypothetical protein	SH02_05650, ,psos,hypothetical protein	SH03_00180, ,psos,hypothetical protein	TP1_03680, ,psos,hypothetical protein	TP2_09675, ,psos,hypothetical protein	TP3_03000, ,psos,hypothetical protein	TP4_01645, ,psos,hypothetical protein	TP4479_09345, ,psos,hypothetical protein	TP8_05360, ,psos,hypothetical protein	TP_2849_00405, ,psos,hypothetical protein	UFV1_04035, ,psos,hypothetical protein	jx18_03425, ,psos,hypothetical protein
39	TP6375_00200, ,psos,IMS_C domain-containing protein	2012CQ_ZSH_07865, ,psos,IMS_C domain-containing protein	Arash114_00200, ,psos,IMS_C domain-containing protein	Bu5_05615, ,psos,IMS_C domain-containing protein	DSM_20630_02480, ,psos,IMS_C domain-containing protein	MS249_01765, ,psos,IMS_C domain-containing protein	NCTC5224_04875, ,psos,IMS_C domain-containing protein	SH01_09130, ,psos,IMS_C domain-containing protein	SH02_05655, ,psos,IMS_C domain-containing protein	SH03_00185, ,psos,IMS_C domain-containing protein	TP1_03675, ,psos,IMS_C domain-containing protein	TP2_09670, ,psos,IMS_C domain-containing protein	TP3_03005, ,psos,IMS_C domain-containing protein	TP4_01640, ,psos,IMS_C domain-containing protein	TP4479_09350, ,psos,IMS_C domain-containing protein	TP8_05365, ,psos,IMS_C domain-containing protein	TP_2849_00410, ,psos,IMS_C domain-containing protein	UFV1_04040, ,psos,IMS_C domain-containing protein	jx18_03420, ,psos,IMS_C domain-containing protein
40	TP6375_00205, ,psos,Error-prone DNA polymerase	2012CQ_ZSH_07870, ,psos,Error-prone DNA polymerase	Arash114_00205, ,psos,Error-prone DNA polymerase	Bu5_05610, ,psos,Error-prone DNA polymerase	DSM_20630_02485, ,psos,Error-prone DNA polymerase	MS249_01770, ,psos,Error-prone DNA polymerase	NCTC5224_04880, ,psos,Error-prone DNA polymerase	SH01_09135, ,psos,Error-prone DNA polymerase	SH02_05660, ,psos,Error-prone DNA polymerase	SH03_00190, ,psos,Error-prone DNA polymerase	TP1_03670, ,psos,Error-prone DNA polymerase	TP2_09665, ,psos,Error-prone DNA polymerase	TP3_03010, ,psos,Error-prone DNA polymerase	TP4_01635, ,psos,Error-prone DNA polymerase	TP4479_09355, ,psos,Error-prone DNA polymerase	TP8_05370, ,psos,Error-prone DNA polymerase	TP_2849_00415, ,psos,Error-prone DNA polymerase	UFV1_04045, ,psos,Error-prone DNA polymerase	jx18_03415, ,psos,Error-prone DNA polymerase
41	TP6375_00210, ,psos,hypothetical protein	2012CQ_ZSH_07875, ,psos,hypothetical protein	Arash114_00210, ,psos,hypothetical protein	Bu5_05605, ,psos,hypothetical protein	DSM_20630_02490, ,psos,hypothetical protein	MS249_01775, ,psos,hypothetical protein	NCTC5224_04885, ,psos,hypothetical protein	SH01_09140, ,psos,hypothetical protein	SH02_05665, ,psos,hypothetical protein	SH03_00195, ,psos,hypothetical protein	TP1_03665, ,psos,hypothetical protein	TP2_09660, ,psos,hypothetical protein	TP3_03015, ,psos,hypothetical protein	TP4_01630, ,psos,hypothetical protein	TP4479_09360, ,psos,hypothetical protein	TP8_05375, ,psos,hypothetical protein	TP_2849_00420, ,psos,hypothetical protein	UFV1_04050, ,psos,hypothetical protein	jx18_03410, ,psos,hypothetical protein
42	TP6375_00215, ,psos,Phosphoribosyl-ATP diphosphatase	2012CQ_ZSH_07880, ,psos,Phosphoribosyl-ATP diphosphatase	Arash114_00215, ,psos,Phosphoribosyl-ATP diphosphatase	Bu5_05600, ,psos,Phosphoribosyl-ATP diphosphatase	DSM_20630_02495, ,psos,Phosphoribosyl-ATP diphosphatase	MS249_01780, ,psos,Phosphoribosyl-ATP diphosphatase	NCTC5224_04890, ,psos,Phosphoribosyl-ATP diphosphatase	SH01_09145, ,psos,Phosphoribosyl-ATP diphosphatase	SH02_05670, ,psos,Phosphoribosyl-ATP diphosphatase	SH03_00200, ,psos,Phosphoribosyl-ATP diphosphatase	TP1_03660, ,psos,Phosphoribosyl-ATP diphosphatase	TP2_09655, ,psos,Phosphoribosyl-ATP diphosphatase	TP3_03020, ,psos,Phosphoribosyl-ATP diphosphatase	TP4_01625, ,psos,Phosphoribosyl-ATP diphosphatase	TP4479_09365, ,psos,Phosphoribosyl-ATP diphosphatase	TP8_05380, ,psos,Phosphoribosyl-ATP diphosphatase	TP_2849_00425, ,psos,Phosphoribosyl-ATP diphosphatase	UFV1_04055, ,psos,Phosphoribosyl-ATP diphosphatase	jx18_03405, ,psos,Phosphoribosyl-ATP diphosphatase
43	TP6375_00225, ,psos,Shikimate dehydrogenase (NADP(+))	2012CQ_ZSH_07890, ,psos,Shikimate dehydrogenase (NADP(+))	Arash114_00225, ,psos,Shikimate dehydrogenase (NADP(+))	Bu5_05590, ,psos,Shikimate dehydrogenase (NADP(+))	DSM_20630_02505, ,psos,Shikimate dehydrogenase (NADP(+))	MS249_01790, ,psos,Shikimate dehydrogenase (NADP(+))	NCTC5224_04900, ,psos,Shikimate dehydrogenase (NADP(+))	SH01_09155, ,psos,Shikimate dehydrogenase (NADP(+))	SH02_05680, ,psos,Shikimate dehydrogenase (NADP(+))	SH03_00210, ,psos,Shikimate dehydrogenase (NADP(+))	TP1_03650, ,psos,Shikimate dehydrogenase (NADP(+))	TP2_09645, ,psos,Shikimate dehydrogenase (NADP(+))	TP3_03030, ,psos,Shikimate dehydrogenase (NADP(+))	TP4_01615, ,psos,Shikimate dehydrogenase (NADP(+))	TP4479_09375, ,psos,Shikimate dehydrogenase (NADP(+))	TP8_05390, ,psos,Shikimate dehydrogenase (NADP(+))	TP_2849_00435, ,psos,Shikimate dehydrogenase (NADP(+))	UFV1_04065, ,psos,Shikimate dehydrogenase (NADP(+))	jx18_03395, ,psos,Shikimate dehydrogenase (NADP(+))
44	TP6375_00230, ,psos,GMP synthase [glutamine-hydrolyzing]	2012CQ_ZSH_07895, ,psos,GMP synthase [glutamine-hydrolyzing]	Arash114_00230, ,psos,GMP synthase [glutamine-hydrolyzing]	Bu5_05585, ,psos,GMP synthase [glutamine-hydrolyzing]	DSM_20630_02510, ,psos,GMP synthase [glutamine-hydrolyzing]	MS249_01795, ,psos,GMP synthase [glutamine-hydrolyzing]	NCTC5224_04905, ,psos,GMP synthase [glutamine-hydrolyzing]	SH01_09160, ,psos,GMP synthase [glutamine-hydrolyzing]	SH02_05685, ,psos,GMP synthase [glutamine-hydrolyzing]	SH03_00215, ,psos,GMP synthase [glutamine-hydrolyzing]	TP1_03645, ,psos,GMP synthase [glutamine-hydrolyzing]	TP2_09640, ,psos,GMP synthase [glutamine-hydrolyzing]	TP3_03035, ,psos,GMP synthase [glutamine-hydrolyzing]	TP4_01610, ,psos,GMP synthase [glutamine-hydrolyzing]	TP4479_09380, ,psos,GMP synthase [glutamine-hydrolyzing]	TP8_05395, ,psos,GMP synthase [glutamine-hydrolyzing]	TP_2849_00440, ,psos,GMP synthase [glutamine-hydrolyzing]	UFV1_04070, ,psos,GMP synthase [glutamine-hydrolyzing]	jx18_03390, ,psos,GMP synthase [glutamine-hydrolyzing]
45	TP6375_00235, ,psos,Putative glutamate--cysteine ligase 2	2012CQ_ZSH_07900, ,psos,Putative glutamate--cysteine ligase 2	Arash114_00235, ,psos,Putative glutamate--cysteine ligase 2	Bu5_05580, ,psos,Putative glutamate--cysteine ligase 2	DSM_20630_02515, ,psos,Putative glutamate--cysteine ligase 2	MS249_01800, ,psos,Putative glutamate--cysteine ligase 2	NCTC5224_04910, ,psos,Putative glutamate--cysteine ligase 2	SH01_09165, ,psos,Putative glutamate--cysteine ligase 2	SH02_05690, ,psos,Putative glutamate--cysteine ligase 2	SH03_00220, ,psos,Putative glutamate--cysteine ligase 2	TP1_03640, ,psos,Putative glutamate--cysteine ligase 2	TP2_09635, ,psos,Putative glutamate--cysteine ligase 2	TP3_03040, ,psos,Putative glutamate--cysteine ligase 2	TP4_01605, ,psos,Putative glutamate--cysteine ligase 2	TP4479_09385, ,psos,Putative glutamate--cysteine ligase 2	TP8_05400, ,psos,Putative glutamate--cysteine ligase 2	TP_2849_00445, ,psos,Putative glutamate--cysteine ligase 2	UFV1_04075, ,psos,Putative glutamate--cysteine ligase 2	jx18_03385, ,psos,Putative glutamate--cysteine ligase 2
46	TP6375_00240, ,psos,Acetylornithine deacetylase	2012CQ_ZSH_07905, ,psos,Acetylornithine deacetylase	Arash114_00240, ,psos,Acetylornithine deacetylase	Bu5_05575, ,psos,Acetylornithine deacetylase	DSM_20630_02520, ,psos,Acetylornithine deacetylase	MS249_01805, ,psos,Acetylornithine deacetylase	NCTC5224_04915, ,psos,Acetylornithine deacetylase	SH01_09170, ,psos,Acetylornithine deacetylase	SH02_05695, ,psos,Acetylornithine deacetylase	SH03_00225, ,psos,Acetylornithine deacetylase	TP1_03635, ,psos,Acetylornithine deacetylase	TP2_09630, ,psos,Acetylornithine deacetylase	TP3_03045, ,psos,Acetylornithine deacetylase	TP4_01600, ,psos,Acetylornithine deacetylase	TP4479_09390, ,psos,Acetylornithine deacetylase	TP8_05405, ,psos,Acetylornithine deacetylase	TP_2849_00450, ,psos,Acetylornithine deacetylase	UFV1_04080, ,psos,Acetylornithine deacetylase	jx18_03380, ,psos,Acetylornithine deacetylase
47	TP6375_00245, ,psos,DNA primase	2012CQ_ZSH_07910, ,psos,DNA primase	Arash114_00245, ,psos,DNA primase	Bu5_05570, ,psos,DNA primase	DSM_20630_02525, ,psos,DNA primase	MS249_01810, ,psos,DNA primase	NCTC5224_04920, ,psos,DNA primase	SH01_09175, ,psos,DNA primase	SH02_05700, ,psos,DNA primase	SH03_00230, ,psos,DNA primase	TP1_03630, ,psos,DNA primase	TP2_09625, ,psos,DNA primase	TP3_03050, ,psos,DNA primase	TP4_01595, ,psos,DNA primase	TP4479_09395, ,psos,DNA primase	TP8_05410, ,psos,DNA primase	TP_2849_00455, ,psos,DNA primase	- , -	jx18_03375, ,psos,DNA primase
48	TP6375_00250, ,psos,Aldo/keto reductase	2012CQ_ZSH_07915, ,psos,Aldo/keto reductase	Arash114_00250, ,psos,Aldo/keto reductase	Bu5_05565, ,psos,Aldo/keto reductase	DSM_20630_02530, ,psos,Aldo/keto reductase	MS249_01815, ,psos,Aldo/keto reductase	NCTC5224_04925, ,psos,Aldo/keto reductase	SH01_09180, ,psos,Aldo/keto reductase	SH02_05705, ,psos,Aldo/keto reductase	SH03_00235, ,psos,Aldo/keto reductase	TP1_03625, ,psos,Aldo/keto reductase	TP2_09620, ,psos,Aldo/keto reductase	TP3_03055, ,psos,Aldo/keto reductase	TP4_01590, ,psos,Aldo/keto reductase	TP4479_09400, ,psos,Aldo/keto reductase	TP8_05415, ,psos,Aldo/keto reductase	TP_2849_00460, ,psos,Aldo/keto reductase	UFV1_03520, ,psos,Aldo/keto reductase	jx18_03370, ,psos,Aldo/keto reductase
49	TP6375_00255, ,psos,Undecaprenyl-diphosphatase	2012CQ_ZSH_07920, ,psos,Undecaprenyl-diphosphatase	Arash114_00255, ,psos,Undecaprenyl-diphosphatase	Bu5_05560, ,psos,Undecaprenyl-diphosphatase	DSM_20630_02535, ,psos,Undecaprenyl-diphosphatase	MS249_01820, ,psos,Undecaprenyl-diphosphatase	NCTC5224_04930, ,psos,Undecaprenyl-diphosphatase	SH01_09185, ,psos,Undecaprenyl-diphosphatase	SH02_05710, ,psos,Undecaprenyl-diphosphatase	SH03_00240, ,psos,Undecaprenyl-diphosphatase	TP1_03620, ,psos,Undecaprenyl-diphosphatase	TP2_09615, ,psos,Undecaprenyl-diphosphatase	TP3_03060, ,psos,Undecaprenyl-diphosphatase	TP4_01585, ,psos,Undecaprenyl-diphosphatase	TP4479_09405, ,psos,Undecaprenyl-diphosphatase	TP8_05420, ,psos,Undecaprenyl-diphosphatase	TP_2849_00465, ,psos,Undecaprenyl-diphosphatase	UFV1_03525, ,psos,Undecaprenyl-diphosphatase	jx18_03365, ,psos,Undecaprenyl-diphosphatase
50	TP6375_00260, ,psos,Phosphorylated carbohydrates phosphatase TM_1254	2012CQ_ZSH_07925, ,psos,Phosphorylated carbohydrates phosphatase TM_1254	Arash114_00260, ,psos,Phosphorylated carbohydrates phosphatase TM_1254	Bu5_05555, ,psos,Phosphorylated carbohydrates phosphatase TM_1254	DSM_20630_02540, ,psos,Phosphorylated carbohydrates phosphatase TM_1254	MS249_01825, ,psos,Phosphorylated carbohydrates phosphatase TM_1254	NCTC5224_04935, ,psos,Phosphorylated carbohydrates phosphatase TM_1254	SH01_09190, ,psos,Phosphorylated carbohydrates phosphatase TM_1254	SH02_05715, ,psos,Phosphorylated carbohydrates phosphatase TM_1254	SH03_00245, ,psos,Phosphorylated carbohydrates phosphatase TM_1254	TP1_03615, ,psos,Phosphorylated carbohydrates phosphatase TM_1254	TP2_09610, ,psos,Phosphorylated carbohydrates phosphatase TM_1254	TP3_03065, ,psos,Phosphorylated carbohydrates phosphatase TM_1254	TP4_01580, ,psos,Phosphorylated carbohydrates phosphatase TM_1254	TP4479_09410, ,psos,Phosphorylated carbohydrates phosphatase TM_1254	TP8_05425, ,psos,Phosphorylated carbohydrates phosphatase TM_1254	TP_2849_00470, ,psos,Phosphorylated carbohydrates phosphatase TM_1254	UFV1_03530, ,psos,Phosphorylated carbohydrates phosphatase TM_1254	jx18_03360, ,psos,Phosphorylated carbohydrates phosphatase TM_1254
51	TP6375_00265, ,psos,Inactivated superfamily I helicase	2012CQ_ZSH_07930, ,psos,Inactivated superfamily I helicase	Arash114_00265, ,psos,Inactivated superfamily I helicase	Bu5_05550, ,psos,Inactivated superfamily I helicase	DSM_20630_02545, ,psos,Inactivated superfamily I helicase	MS249_01830, ,psos,Inactivated superfamily I helicase	NCTC5224_04940, ,psos,Inactivated superfamily I helicase	SH01_09195, ,psos,Inactivated superfamily I helicase	SH02_05720, ,psos,Inactivated superfamily I helicase	SH03_00250, ,psos,Inactivated superfamily I helicase	TP1_03610, ,psos,Inactivated superfamily I helicase	TP2_09605, ,psos,Inactivated superfamily I helicase	TP3_03070, ,psos,Inactivated superfamily I helicase	TP4_01575, ,psos,Inactivated superfamily I helicase	TP4479_09415, ,psos,Inactivated superfamily I helicase	TP8_05430, ,psos,Inactivated superfamily I helicase	TP_2849_00475, ,psos,Inactivated superfamily I helicase	UFV1_03535, ,psos,Inactivated superfamily I helicase	jx18_03355, ,psos,Inactivated superfamily I helicase
52	TP6375_00270, ,psos,tRNA (Adenine(58)-N(1))-methyltransferase TrmI	2012CQ_ZSH_07935, ,psos,tRNA (Adenine(58)-N(1))-methyltransferase TrmI	Arash114_00270, ,psos,tRNA (Adenine(58)-N(1))-methyltransferase TrmI	Bu5_05545, ,psos,tRNA (Adenine(58)-N(1))-methyltransferase TrmI	DSM_20630_02550, ,psos,tRNA (Adenine(58)-N(1))-methyltransferase TrmI	MS249_01835, ,psos,tRNA (Adenine(58)-N(1))-methyltransferase TrmI	NCTC5224_04945, ,psos,tRNA (Adenine(58)-N(1))-methyltransferase TrmI	SH01_09200, ,psos,tRNA (Adenine(58)-N(1))-methyltransferase TrmI	SH02_05725, ,psos,tRNA (Adenine(58)-N(1))-methyltransferase TrmI	SH03_00255, ,psos,tRNA (Adenine(58)-N(1))-methyltransferase TrmI	TP1_03605, ,psos,tRNA (Adenine(58)-N(1))-methyltransferase TrmI	TP2_09600, ,psos,tRNA (Adenine(58)-N(1))-methyltransferase TrmI	TP3_03075, ,psos,tRNA (Adenine(58)-N(1))-methyltransferase TrmI	TP4_01570, ,psos,tRNA (Adenine(58)-N(1))-methyltransferase TrmI	TP4479_09420, ,psos,tRNA (Adenine(58)-N(1))-methyltransferase TrmI	TP8_05435, ,psos,tRNA (Adenine(58)-N(1))-methyltransferase TrmI	TP_2849_00480, ,psos,tRNA (Adenine(58)-N(1))-methyltransferase TrmI	UFV1_03540, ,psos,tRNA (Adenine(58)-N(1))-methyltransferase TrmI	jx18_03350, ,psos,tRNA (Adenine(58)-N(1))-methyltransferase TrmI
53	TP6375_00275, ,psos,AAA ATPase forming ring-shaped complexes	2012CQ_ZSH_07940, ,psos,AAA ATPase forming ring-shaped complexes	Arash114_00275, ,psos,AAA ATPase forming ring-shaped complexes	Bu5_05540, ,psos,AAA ATPase forming ring-shaped complexes	DSM_20630_02555, ,psos,AAA ATPase forming ring-shaped complexes	MS249_01840, ,psos,AAA ATPase forming ring-shaped complexes	NCTC5224_04950, ,psos,AAA ATPase forming ring-shaped complexes	SH01_09205, ,psos,AAA ATPase forming ring-shaped complexes	SH02_05730, ,psos,AAA ATPase forming ring-shaped complexes	SH03_00260, ,psos,AAA ATPase forming ring-shaped complexes	TP1_03600, ,psos,AAA ATPase forming ring-shaped complexes	TP2_09595, ,psos,AAA ATPase forming ring-shaped complexes	TP3_03080, ,psos,AAA ATPase forming ring-shaped complexes	TP4_01565, ,psos,AAA ATPase forming ring-shaped complexes	TP4479_09425, ,psos,AAA ATPase forming ring-shaped complexes	TP8_05440, ,psos,AAA ATPase forming ring-shaped complexes	TP_2849_00485, ,psos,AAA ATPase forming ring-shaped complexes	UFV1_03545, ,psos,AAA ATPase forming ring-shaped complexes	jx18_03345, ,psos,AAA ATPase forming ring-shaped complexes
54	TP6375_00280, ,psos,Proteasome accessory factor PafA2	2012CQ_ZSH_07945, ,psos,Proteasome accessory factor PafA2	Arash114_00280, ,psos,Proteasome accessory factor PafA2	Bu5_05535, ,psos,Proteasome accessory factor PafA2	DSM_20630_02560, ,psos,Proteasome accessory factor PafA2	MS249_01845, ,psos,Proteasome accessory factor PafA2	NCTC5224_04955, ,psos,Proteasome accessory factor PafA2	SH01_09210, ,psos,Proteasome accessory factor PafA2	SH02_05735, ,psos,Proteasome accessory factor PafA2	SH03_00265, ,psos,Proteasome accessory factor PafA2	TP1_03595, ,psos,Proteasome accessory factor PafA2	TP2_09590, ,psos,Proteasome accessory factor PafA2	TP3_03085, ,psos,Proteasome accessory factor PafA2	TP4_01560, ,psos,Proteasome accessory factor PafA2	TP4479_09430, ,psos,Proteasome accessory factor PafA2	TP8_05445, ,psos,Proteasome accessory factor PafA2	TP_2849_00490, ,psos,Proteasome accessory factor PafA2	UFV1_03550, ,psos,Proteasome accessory factor PafA2	jx18_03340, ,psos,Proteasome accessory factor PafA2
55	TP6375_00285, ,psos,Bacterial ubiquitin-like modifier	2012CQ_ZSH_07950, ,psos,Bacterial ubiquitin-like modifier	Arash114_00285, ,psos,Bacterial ubiquitin-like modifier	Bu5_05530, ,psos,Bacterial ubiquitin-like modifier	DSM_20630_02565, ,psos,Bacterial ubiquitin-like modifier	MS249_01850, ,psos,Bacterial ubiquitin-like modifier	NCTC5224_04960, ,psos,Bacterial ubiquitin-like modifier	SH01_09215, ,psos,Bacterial ubiquitin-like modifier	SH02_05740, ,psos,Bacterial ubiquitin-like modifier	SH03_00270, ,psos,Bacterial ubiquitin-like modifier	TP1_03590, ,psos,Bacterial ubiquitin-like modifier	TP2_09585, ,psos,Bacterial ubiquitin-like modifier	TP3_03090, ,psos,Bacterial ubiquitin-like modifier	TP4_01555, ,psos,Bacterial ubiquitin-like modifier	TP4479_09435, ,psos,Bacterial ubiquitin-like modifier	TP8_05450, ,psos,Bacterial ubiquitin-like modifier	TP_2849_00495, ,psos,Bacterial ubiquitin-like modifier	UFV1_03555, ,psos,Bacterial ubiquitin-like modifier	jx18_03335, ,psos,Bacterial ubiquitin-like modifier
56	TP6375_00290, ,psos,Pup--protein ligase	2012CQ_ZSH_07955, ,psos,Pup--protein ligase	Arash114_00290, ,psos,Pup--protein ligase	Bu5_05525, ,psos,Pup--protein ligase	DSM_20630_02570, ,psos,Pup--protein ligase	MS249_01855, ,psos,Pup--protein ligase	NCTC5224_04965, ,psos,Pup--protein ligase	SH01_09220, ,psos,Pup--protein ligase	SH02_05745, ,psos,Pup--protein ligase	SH03_00275, ,psos,Pup--protein ligase	TP1_03585, ,psos,Pup--protein ligase	TP2_09580, ,psos,Pup--protein ligase	TP3_03095, ,psos,Pup--protein ligase	TP4_01550, ,psos,Pup--protein ligase	TP4479_09440, ,psos,Pup--protein ligase	TP8_05455, ,psos,Pup--protein ligase	TP_2849_00500, ,psos,Pup--protein ligase	UFV1_03560, ,psos,Pup--protein ligase	jx18_03330, ,psos,Pup--protein ligase
57	TP6375_00295, ,psos,Peptidyl-prolyl cis-trans isomerase	2012CQ_ZSH_07960, ,psos,Peptidyl-prolyl cis-trans isomerase	Arash114_00295, ,psos,Peptidyl-prolyl cis-trans isomerase	Bu5_05520, ,psos,Peptidyl-prolyl cis-trans isomerase	DSM_20630_02575, ,psos,Peptidyl-prolyl cis-trans isomerase	MS249_05805, ,psos,Peptidyl-prolyl cis-trans isomerase	NCTC5224_04970, ,psos,Peptidyl-prolyl cis-trans isomerase	SH01_09225, ,psos,Peptidyl-prolyl cis-trans isomerase	SH02_05750, ,psos,Peptidyl-prolyl cis-trans isomerase	SH03_00280, ,psos,Peptidyl-prolyl cis-trans isomerase	TP1_03580, ,psos,Peptidyl-prolyl cis-trans isomerase	TP2_09575, ,psos,Peptidyl-prolyl cis-trans isomerase	TP3_03100, ,psos,Peptidyl-prolyl cis-trans isomerase	TP4_01545, ,psos,Peptidyl-prolyl cis-trans isomerase	TP4479_09445, ,psos,Peptidyl-prolyl cis-trans isomerase	TP8_05460, ,psos,Peptidyl-prolyl cis-trans isomerase	TP_2849_00505, ,psos,Peptidyl-prolyl cis-trans isomerase	UFV1_03565, ,psos,Peptidyl-prolyl cis-trans isomerase	jx18_03325, ,psos,Peptidyl-prolyl cis-trans isomerase
58	TP6375_00300, ,psos,Cytidylate kinase	2012CQ_ZSH_07965, ,psos,Cytidylate kinase	Arash114_00300, ,psos,Cytidylate kinase	Bu5_05515, ,psos,hypothetical protein	DSM_20630_02580, ,psos,Cytidylate kinase	MS249_05810, ,psos,Cytidylate kinase	NCTC5224_04975, ,psos,Cytidylate kinase	SH01_09230, ,psos,Cytidylate kinase	SH02_05755, ,psos,Cytidylate kinase	SH03_00285, ,psos,Cytidylate kinase	TP1_03575, ,psos,Cytidylate kinase	TP2_09570, ,psos,Cytidylate kinase	TP3_03105, ,psos,Cytidylate kinase	TP4_01540, ,psos,Cytidylate kinase	TP4479_09450, ,psos,Cytidylate kinase	TP8_05465, ,psos,Cytidylate kinase	TP_2849_00510, ,psos,Cytidylate kinase	UFV1_03570, ,psos,Cytidylate kinase	jx18_03320, ,psos,Cytidylate kinase
59	TP6375_00305, ,psos,Imidazole glycerol phosphate synthase subunit HisF	2012CQ_ZSH_07970, ,psos,Imidazole glycerol phosphate synthase subunit HisF	Arash114_00305, ,psos,Imidazole glycerol phosphate synthase subunit HisF	Bu5_05510, ,psos,Imidazole glycerol phosphate synthase subunit HisF	DSM_20630_02585, ,psos,Imidazole glycerol phosphate synthase subunit HisF	MS249_05815, ,psos,Imidazole glycerol phosphate synthase subunit HisF	NCTC5224_04980, ,psos,Imidazole glycerol phosphate synthase subunit HisF	SH01_09235, ,psos,Imidazole glycerol phosphate synthase subunit HisF	SH02_05760, ,psos,Imidazole glycerol phosphate synthase subunit HisF	SH03_00290, ,psos,Imidazole glycerol phosphate synthase subunit HisF	TP1_03570, ,psos,Imidazole glycerol phosphate synthase subunit HisF	TP2_09565, ,psos,Imidazole glycerol phosphate synthase subunit HisF	TP3_03110, ,psos,Imidazole glycerol phosphate synthase subunit HisF	TP4_01535, ,psos,Imidazole glycerol phosphate synthase subunit HisF	TP4479_09455, ,psos,Imidazole glycerol phosphate synthase subunit HisF	- , -	TP_2849_00515, ,psos,Imidazole glycerol phosphate synthase subunit HisF	UFV1_03575, ,psos,Imidazole glycerol phosphate synthase subunit HisF	jx18_03315, ,psos,Imidazole glycerol phosphate synthase subunit HisF
60	TP6375_00310, ,psos,Phosphoribosyl-AMP cyclohydrolase	2012CQ_ZSH_07975, ,psos,Phosphoribosyl-AMP cyclohydrolase	Arash114_00310, ,psos,Phosphoribosyl-AMP cyclohydrolase	Bu5_05505, ,psos,Phosphoribosyl-AMP cyclohydrolase	DSM_20630_02590, ,psos,Phosphoribosyl-AMP cyclohydrolase	MS249_05820, ,psos,Phosphoribosyl-AMP cyclohydrolase	NCTC5224_04985, ,psos,Phosphoribosyl-AMP cyclohydrolase	SH01_09240, ,psos,Phosphoribosyl-AMP cyclohydrolase	SH02_05765, ,psos,Phosphoribosyl-AMP cyclohydrolase	SH03_00295, ,psos,Phosphoribosyl-AMP cyclohydrolase	TP1_03565, ,psos,Phosphoribosyl-AMP cyclohydrolase	TP2_09560, ,psos,Phosphoribosyl-AMP cyclohydrolase	TP3_03115, ,psos,Phosphoribosyl-AMP cyclohydrolase	TP4_01530, ,psos,Phosphoribosyl-AMP cyclohydrolase	TP4479_09460, ,psos,Phosphoribosyl-AMP cyclohydrolase	TP8_05680, ,psos,Phosphoribosyl-AMP cyclohydrolase	TP_2849_00520, ,psos,Phosphoribosyl-AMP cyclohydrolase	UFV1_03580, ,psos,Phosphoribosyl-AMP cyclohydrolase	jx18_03310, ,psos,Phosphoribosyl-AMP cyclohydrolase
61	TP6375_00315, ,psos,Indole-3-glycerol-phosphate synthase	2012CQ_ZSH_07980, ,psos,Indole-3-glycerol-phosphate synthase	Arash114_00315, ,psos,Indole-3-glycerol-phosphate synthase	Bu5_05500, ,psos,Indole-3-glycerol-phosphate synthase	DSM_20630_02595, ,psos,Indole-3-glycerol-phosphate synthase	MS249_05825, ,psos,Indole-3-glycerol-phosphate synthase	NCTC5224_04990, ,psos,Indole-3-glycerol-phosphate synthase	SH01_09245, ,psos,Indole-3-glycerol-phosphate synthase	SH02_05770, ,psos,Indole-3-glycerol-phosphate synthase	SH03_00300, ,psos,Indole-3-glycerol-phosphate synthase	TP1_03560, ,psos,Indole-3-glycerol-phosphate synthase	TP2_09555, ,psos,Indole-3-glycerol-phosphate synthase	TP3_03120, ,psos,Indole-3-glycerol-phosphate synthase	TP4_01525, ,psos,Indole-3-glycerol-phosphate synthase	TP4479_09465, ,psos,Indole-3-glycerol-phosphate synthase	TP8_05675, ,psos,Indole-3-glycerol-phosphate synthase	TP_2849_00525, ,psos,Indole-3-glycerol-phosphate synthase	UFV1_03585, ,psos,Indole-3-glycerol-phosphate synthase	jx18_03305, ,psos,Indole-3-glycerol-phosphate synthase
62	TP6375_00320, ,psos,Phosphatidylglycerol--prolipoprotein diacylglyceryl transferase	2012CQ_ZSH_07985, ,psos,Phosphatidylglycerol--prolipoprotein diacylglyceryl transferase	Arash114_00320, ,psos,Phosphatidylglycerol--prolipoprotein diacylglyceryl transferase	Bu5_05495, ,psos,Phosphatidylglycerol--prolipoprotein diacylglyceryl transferase	DSM_20630_02600, ,psos,Phosphatidylglycerol--prolipoprotein diacylglyceryl transferase	MS249_05830, ,psos,Phosphatidylglycerol--prolipoprotein diacylglyceryl transferase	NCTC5224_04995, ,psos,Phosphatidylglycerol--prolipoprotein diacylglyceryl transferase	SH01_09250, ,psos,Phosphatidylglycerol--prolipoprotein diacylglyceryl transferase	SH02_05775, ,psos,Phosphatidylglycerol--prolipoprotein diacylglyceryl transferase	SH03_00305, ,psos,Phosphatidylglycerol--prolipoprotein diacylglyceryl transferase	TP1_03555, ,psos,Phosphatidylglycerol--prolipoprotein diacylglyceryl transferase	TP2_09550, ,psos,Phosphatidylglycerol--prolipoprotein diacylglyceryl transferase	TP3_03125, ,psos,Phosphatidylglycerol--prolipoprotein diacylglyceryl transferase	TP4_01520, ,psos,Phosphatidylglycerol--prolipoprotein diacylglyceryl transferase	TP4479_09470, ,psos,Phosphatidylglycerol--prolipoprotein diacylglyceryl transferase	TP8_05670, ,psos,Phosphatidylglycerol--prolipoprotein diacylglyceryl transferase	TP_2849_00530, ,psos,Phosphatidylglycerol--prolipoprotein diacylglyceryl transferase	UFV1_03590, ,psos,Phosphatidylglycerol--prolipoprotein diacylglyceryl transferase	jx18_03300, ,psos,Phosphatidylglycerol--prolipoprotein diacylglyceryl transferase
63	TP6375_00325, ,psos,Pyruvate kinase	2012CQ_ZSH_07990, ,psos,Pyruvate kinase	Arash114_00325, ,psos,Pyruvate kinase	Bu5_05490, ,psos,Pyruvate kinase	DSM_20630_02605, ,psos,Pyruvate kinase	MS249_05835, ,psos,Pyruvate kinase	NCTC5224_05000, ,psos,Pyruvate kinase	SH01_09255, ,psos,Pyruvate kinase	SH02_05780, ,psos,Pyruvate kinase	SH03_00310, ,psos,Pyruvate kinase	TP1_03550, ,psos,Pyruvate kinase	TP2_09545, ,psos,Pyruvate kinase	TP3_03130, ,psos,Pyruvate kinase	TP4_01515, ,psos,Pyruvate kinase	TP4479_09475, ,psos,Pyruvate kinase	TP8_05665, ,psos,Pyruvate kinase	TP_2849_00535, ,psos,Pyruvate kinase	UFV1_03595, ,psos,Pyruvate kinase	jx18_03295, ,psos,Pyruvate kinase
64	TP6375_00335, ,psos,Putative transcriptional regulatory protein pdtaR	2012CQ_ZSH_08000, ,psos,Putative transcriptional regulatory protein pdtaR	Arash114_00335, ,psos,Putative transcriptional regulatory protein pdtaR	Bu5_05480, ,psos,Putative transcriptional regulatory protein pdtaR	DSM_20630_02615, ,psos,Putative transcriptional regulatory protein pdtaR	MS249_05845, ,psos,Putative transcriptional regulatory protein pdtaR	NCTC5224_05010, ,psos,Putative transcriptional regulatory protein pdtaR	SH01_09265, ,psos,Putative transcriptional regulatory protein pdtaR	SH02_05790, ,psos,Putative transcriptional regulatory protein pdtaR	SH03_00320, ,psos,Putative transcriptional regulatory protein pdtaR	TP1_03540, ,psos,Putative transcriptional regulatory protein pdtaR	TP2_09535, ,psos,Putative transcriptional regulatory protein pdtaR	TP3_03140, ,psos,Putative transcriptional regulatory protein pdtaR	TP4_01505, ,psos,Putative transcriptional regulatory protein pdtaR	TP4479_09485, ,psos,Putative transcriptional regulatory protein pdtaR	TP8_05655, ,psos,Putative transcriptional regulatory protein pdtaR	TP_2849_00545, ,psos,Putative transcriptional regulatory protein pdtaR	UFV1_03605, ,psos,Putative transcriptional regulatory protein pdtaR	jx18_03285, ,psos,Putative transcriptional regulatory protein pdtaR
65	TP6375_00340, ,psos,Esterase HI_1161	2012CQ_ZSH_08005, ,psos,Esterase HI_1161	Arash114_00340, ,psos,Esterase HI_1161	Bu5_05475, ,psos,Esterase HI_1161	DSM_20630_02620, ,psos,Esterase HI_1161	MS249_05850, ,psos,Esterase HI_1161	NCTC5224_05015, ,psos,Esterase HI_1161	SH01_09270, ,psos,Esterase HI_1161	SH02_05795, ,psos,Esterase HI_1161	SH03_00325, ,psos,Esterase HI_1161	TP1_03535, ,psos,Esterase HI_1161	TP2_09530, ,psos,Esterase HI_1161	TP3_03145, ,psos,Esterase HI_1161	TP4_01500, ,psos,Esterase HI_1161	TP4479_09490, ,psos,Esterase HI_1161	TP8_05650, ,psos,Esterase HI_1161	TP_2849_00550, ,psos,Esterase HI_1161	UFV1_02630, ,psos,Esterase HI_1161,IDENTICAL PARALOGS:,UFV1_03610,Esterase HI_1161	jx18_03280, ,psos,Esterase HI_1161
66	TP6375_00345, ,psos,DNA polymerase I	2012CQ_ZSH_08010, ,psos,DNA polymerase I	Arash114_00345, ,psos,DNA polymerase I	Bu5_05470, ,psos,DNA polymerase I	DSM_20630_02625, ,psos,DNA polymerase I	MS249_05855, ,psos,DNA polymerase I	NCTC5224_05020, ,psos,DNA polymerase I	SH01_09275, ,psos,DNA polymerase I	SH02_05800, ,psos,DNA polymerase I	SH03_00330, ,psos,DNA polymerase I	TP1_03530, ,psos,DNA polymerase I	TP2_09525, ,psos,DNA polymerase I	TP3_03150, ,psos,DNA polymerase I	TP4_01495, ,psos,DNA polymerase I	TP4479_09495, ,psos,DNA polymerase I	TP8_05645, ,psos,DNA polymerase I	TP_2849_00555, ,psos,DNA polymerase I	UFV1_02635, ,psos,DNA polymerase I,IDENTICAL PARALOGS:,UFV1_03615,DNA polymerase I	jx18_03275, ,psos,DNA polymerase I
67	TP6375_00350, ,psos,30S ribosomal protein S1	2012CQ_ZSH_08015, ,psos,30S ribosomal protein S1	Arash114_00350, ,psos,30S ribosomal protein S1	Bu5_05465, ,psos,30S ribosomal protein S1	DSM_20630_02630, ,psos,30S ribosomal protein S1	MS249_05860, ,psos,30S ribosomal protein S1	NCTC5224_05025, ,psos,30S ribosomal protein S1	SH01_09280, ,psos,30S ribosomal protein S1	SH02_05805, ,psos,30S ribosomal protein S1	SH03_00335, ,psos,30S ribosomal protein S1	TP1_03525, ,psos,30S ribosomal protein S1	TP2_09520, ,psos,30S ribosomal protein S1	TP3_03160, ,psos,30S ribosomal protein S1	TP4_01490, ,psos,30S ribosomal protein S1	TP4479_09505, ,psos,30S ribosomal protein S1	TP8_05635, ,psos,30S ribosomal protein S1	TP_2849_00560, ,psos,30S ribosomal protein S1	UFV1_02640, ,psos,30S ribosomal protein S1,IDENTICAL PARALOGS:,UFV1_03620,30S ribosomal protein S1	jx18_03270, ,psos,30S ribosomal protein S1
68	TP6375_00355, ,psos,hypothetical protein	- , -	- , -	- , -	- , -	- , -	- , -	- , -	- , -	- , -	- , -	- , -	- , -	- , -	- , -	- , -	- , -	UFV1_02645, ,psos,hypothetical protein,IDENTICAL PARALOGS:,UFV1_03625,hypothetical protein	- , -
69	TP6375_00360, ,psos,hypothetical protein	2012CQ_ZSH_08035, ,psos,hypothetical protein	Arash114_00355, ,psos,hypothetical protein	Bu5_05460, ,psos,hypothetical protein	DSM_20630_02635, ,psos,hypothetical protein	MS249_05865, ,psos,hypothetical protein	NCTC5224_05030, ,psos,hypothetical protein	SH01_09285, ,psos,hypothetical protein	SH02_05810, ,psos,hypothetical protein	SH03_00340, ,psos,hypothetical protein	TP1_03520, ,psos,hypothetical protein	TP2_09515, ,psos,hypothetical protein	TP3_03165, ,psos,hypothetical protein	TP4_01485, ,psos,hypothetical protein	TP4479_09510, ,psos,hypothetical protein	TP8_05630, ,psos,hypothetical protein	TP_2849_00565, ,psos,hypothetical protein	UFV1_02650, ,psos,hypothetical protein,IDENTICAL PARALOGS:,UFV1_03630,hypothetical protein	jx18_03265, ,psos,hypothetical protein
70	TP6375_00365, ,psos,ABC transporter ATP-binding protein	2012CQ_ZSH_08040, ,psos,ABC transporter ATP-binding protein	Arash114_00360, ,psos,ABC transporter ATP-binding protein	Bu5_05455, ,psos,ABC transporter ATP-binding protein	DSM_20630_02640, ,psos,ABC transporter ATP-binding protein	MS249_05870, ,psos,ATP-binding cassette domain-containing protein	NCTC5224_05035, ,psos,ABC transporter ATP-binding protein	SH01_09290, ,psos,ABC transporter ATP-binding protein	SH02_05815, ,psos,ABC transporter ATP-binding protein	SH03_00345, ,psos,ABC transporter ATP-binding protein	TP1_03515, ,psos,ABC transporter ATP-binding protein	TP2_09510, ,psos,ABC transporter ATP-binding protein	TP3_03170, ,psos,ABC transporter ATP-binding protein	TP4_01480, ,psos,ABC transporter ATP-binding protein	TP4479_09515, ,psos,ABC transporter ATP-binding protein	TP8_05625, ,psos,ABC transporter ATP-binding protein	TP_2849_00570, ,psos,ABC transporter ATP-binding protein	UFV1_02655, ,psos,ABC transporter ATP-binding protein,IDENTICAL PARALOGS:,UFV1_03635,ABC transporter ATP-binding protein	jx18_03260, ,psos,ABC transporter ATP-binding protein
71	TP6375_00370, ,psos,5-oxoprolyl-peptidase	2012CQ_ZSH_08045, ,psos,5-oxoprolyl-peptidase	Arash114_00365, ,psos,5-oxoprolyl-peptidase	Bu5_05450, ,psos,5-oxoprolyl-peptidase	DSM_20630_02645, ,psos,5-oxoprolyl-peptidase	MS249_05875, ,psos,5-oxoprolyl-peptidase	NCTC5224_05040, ,psos,5-oxoprolyl-peptidase	SH01_09295, ,psos,5-oxoprolyl-peptidase	SH02_05820, ,psos,5-oxoprolyl-peptidase	SH03_00350, ,psos,5-oxoprolyl-peptidase	TP1_03510, ,psos,5-oxoprolyl-peptidase	TP2_09505, ,psos,5-oxoprolyl-peptidase	TP3_03175, ,psos,5-oxoprolyl-peptidase	TP4_01475, ,psos,5-oxoprolyl-peptidase	TP4479_09520, ,psos,5-oxoprolyl-peptidase	TP8_05620, ,psos,5-oxoprolyl-peptidase	TP_2849_00575, ,psos,5-oxoprolyl-peptidase	UFV1_02660, ,psos,5-oxoprolyl-peptidase,IDENTICAL PARALOGS:,UFV1_03640,5-oxoprolyl-peptidase	jx18_03255, ,psos,5-oxoprolyl-peptidase
72	TP6375_00375, ,psos,Dephospho-CoA kinase	2012CQ_ZSH_08050, ,psos,Dephospho-CoA kinase	Arash114_00370, ,psos,Dephospho-CoA kinase	Bu5_05445, ,psos,Dephospho-CoA kinase	DSM_20630_02650, ,psos,Dephospho-CoA kinase	MS249_05880, ,psos,Dephospho-CoA kinase	NCTC5224_05045, ,psos,Dephospho-CoA kinase	SH01_09300, ,psos,Dephospho-CoA kinase	SH02_05825, ,psos,Dephospho-CoA kinase	SH03_00355, ,psos,Dephospho-CoA kinase	TP1_03505, ,psos,Dephospho-CoA kinase	TP2_09500, ,psos,Dephospho-CoA kinase	TP3_03180, ,psos,Dephospho-CoA kinase	TP4_01470, ,psos,Dephospho-CoA kinase	TP4479_09525, ,psos,Dephospho-CoA kinase	TP8_05615, ,psos,Dephospho-CoA kinase	TP_2849_00580, ,psos,Dephospho-CoA kinase	UFV1_02665, ,psos,Dephospho-CoA kinase,IDENTICAL PARALOGS:,UFV1_03645,Dephospho-CoA kinase	jx18_03250, ,psos,Dephospho-CoA kinase
73	TP6375_00380, ,psos,UvrABC system protein B	2012CQ_ZSH_08055, ,psos,UvrABC system protein B	Arash114_00375, ,psos,UvrABC system protein B	Bu5_05440, ,psos,UvrABC system protein B	DSM_20630_02655, ,psos,UvrABC system protein B	MS249_05885, ,psos,UvrABC system protein B	NCTC5224_05050, ,psos,UvrABC system protein B	SH01_09305, ,psos,UvrABC system protein B	SH02_05830, ,psos,UvrABC system protein B	SH03_00360, ,psos,UvrABC system protein B	TP1_03500, ,psos,UvrABC system protein B	TP2_09495, ,psos,UvrABC system protein B	TP3_03185, ,psos,UvrABC system protein B	TP4_01465, ,psos,UvrABC system protein B	TP4479_09530, ,psos,UvrABC system protein B	TP8_05610, ,psos,UvrABC system protein B	TP_2849_00585, ,psos,UvrABC system protein B	UFV1_02670, ,psos,UvrABC system protein B,IDENTICAL PARALOGS:,UFV1_03650,UvrABC system protein B	jx18_03245, ,psos,UvrABC system protein B
74	TP6375_00385, ,psos,Inner membrane protein alx	2012CQ_ZSH_08060, ,psos,Inner membrane protein alx	Arash114_00380, ,psos,Inner membrane protein alx	Bu5_05435, ,psos,Inner membrane protein alx	DSM_20630_02660, ,psos,Inner membrane protein alx	MS249_05890, ,psos,Inner membrane protein alx	NCTC5224_05055, ,psos,Inner membrane protein alx	SH01_09310, ,psos,Inner membrane protein alx	SH02_05835, ,psos,Inner membrane protein alx	SH03_00365, ,psos,Inner membrane protein alx	TP1_03495, ,psos,Inner membrane protein alx	TP2_09490, ,psos,Inner membrane protein alx	TP3_03190, ,psos,Inner membrane protein alx	TP4_01460, ,psos,Inner membrane protein alx	TP4479_09535, ,psos,Inner membrane protein alx	TP8_05605, ,psos,hypothetical protein	TP_2849_00590, ,psos,Inner membrane protein alx	UFV1_02675, ,psos,Inner membrane protein alx,IDENTICAL PARALOGS:,UFV1_03655,Inner membrane protein alx	jx18_03240, ,psos,Inner membrane protein alx
75	TP6375_00390, ,psos,Sodium Bile acid symporter family protein	2012CQ_ZSH_08065, ,psos,Sodium Bile acid symporter family protein	Arash114_00385, ,psos,Sodium Bile acid symporter family protein	Bu5_05430, ,psos,Sodium Bile acid symporter family protein	DSM_20630_02665, ,psos,Sodium Bile acid symporter family protein	MS249_05895, ,psos,Sodium Bile acid symporter family protein	NCTC5224_05060, ,psos,Sodium Bile acid symporter family protein	SH01_09315, ,psos,Sodium Bile acid symporter family protein	SH02_05840, ,psos,Sodium Bile acid symporter family protein	SH03_00370, ,psos,Sodium Bile acid symporter family protein	TP1_03490, ,psos,Sodium Bile acid symporter family protein	TP2_09485, ,psos,Sodium Bile acid symporter family protein	TP3_03195, ,psos,Sodium Bile acid symporter family protein	TP4_01455, ,psos,Sodium Bile acid symporter family protein	TP4479_09540, ,psos,Sodium Bile acid symporter family protein	TP8_05595, ,psos,Sodium Bile acid symporter family protein	TP_2849_00595, ,psos,Sodium Bile acid symporter family protein	UFV1_02680, ,psos,Sodium Bile acid symporter family protein,IDENTICAL PARALOGS:,UFV1_03660,Sodium Bile acid symporter family protein	jx18_03235, ,psos,Sodium Bile acid symporter family protein
76	TP6375_00395, ,psos,YCII domain-containing protein	2012CQ_ZSH_08070, ,psos,YCII domain-containing protein	Arash114_00390, ,psos,YCII domain-containing protein	Bu5_05425, ,psos,YCII domain-containing protein	DSM_20630_02670, ,psos,YCII domain-containing protein	MS249_05900, ,psos,YCII domain-containing protein	NCTC5224_05065, ,psos,YCII domain-containing protein	SH01_09320, ,psos,YCII domain-containing protein	SH02_05845, ,psos,YCII domain-containing protein	SH03_00375, ,psos,YCII domain-containing protein	TP1_03485, ,psos,YCII domain-containing protein	TP2_09480, ,psos,YCII domain-containing protein	TP3_03200, ,psos,YCII domain-containing protein	TP4_01450, ,psos,YCII domain-containing protein	TP4479_09545, ,psos,YCII domain-containing protein	TP8_05590, ,psos,YCII domain-containing protein	TP_2849_00600, ,psos,YCII domain-containing protein	UFV1_02685, ,psos,YCII domain-containing protein,IDENTICAL PARALOGS:,UFV1_03665,YCII domain-containing protein	jx18_03230, ,psos,YCII domain-containing protein
77	TP6375_00400, ,psos,UvrABC system protein A	2012CQ_ZSH_08075, ,psos,UvrABC system protein A	Arash114_00395, ,psos,UvrABC system protein A	Bu5_05420, ,psos,UvrABC system protein A	DSM_20630_02675, ,psos,UvrABC system protein A	MS249_05905, ,psos,UvrABC system protein A	NCTC5224_05070, ,psos,UvrABC system protein A	SH01_09325, ,psos,UvrABC system protein A	SH02_05850, ,psos,UvrABC system protein A	SH03_00380, ,psos,UvrABC system protein A	TP1_03480, ,psos,UvrABC system protein A	TP2_09475, ,psos,UvrABC system protein A	TP3_03205, ,psos,UvrABC system protein A	TP4_01445, ,psos,UvrABC system protein A	TP4479_09550, ,psos,UvrABC system protein A	TP8_05585, ,psos,UvrABC system protein A	TP_2849_00605, ,psos,UvrABC system protein A	UFV1_02690, ,psos,UvrABC system protein A,IDENTICAL PARALOGS:,UFV1_03670,UvrABC system protein A	jx18_03225, ,psos,UvrABC system protein A
78	TP6375_00405, ,psos,UvrABC system protein C	2012CQ_ZSH_08080, ,psos,UvrABC system protein C	Arash114_00400, ,psos,UvrABC system protein C	Bu5_05415, ,psos,UvrABC system protein C	DSM_20630_02680, ,psos,UvrABC system protein C	MS249_05910, ,psos,UvrABC system protein C	NCTC5224_05075, ,psos,UvrABC system protein C	SH01_09330, ,psos,UvrABC system protein C	SH02_05855, ,psos,UvrABC system protein C	SH03_00385, ,psos,UvrABC system protein C	TP1_03475, ,psos,UvrABC system protein C	TP2_09470, ,psos,UvrABC system protein C	TP3_03210, ,psos,UvrABC system protein C	TP4_01440, ,psos,UvrABC system protein C	TP4479_09555, ,psos,UvrABC system protein C	TP8_05580, ,psos,UvrABC system protein C	TP_2849_00610, ,psos,UvrABC system protein C	UFV1_02695, ,psos,UvrABC system protein C,IDENTICAL PARALOGS:,UFV1_03675,UvrABC system protein C	jx18_03220, ,psos,UvrABC system protein C
79	TP6375_00410, ,psos,Nucleotide-binding protein DBV13_00405	2012CQ_ZSH_08085, ,psos,Nucleotide-binding protein DBV13_00405	Arash114_00405, ,psos,Nucleotide-binding protein DBV13_00405	Bu5_05410, ,psos,Nucleotide-binding protein DBV13_00405	DSM_20630_02685, ,psos,Nucleotide-binding protein DBV13_00405	MS249_05915, ,psos,Nucleotide-binding protein DBV13_00405	NCTC5224_05080, ,psos,Nucleotide-binding protein DBV13_00405	SH01_09335, ,psos,Nucleotide-binding protein DBV13_00405	SH02_05860, ,psos,Nucleotide-binding protein DBV13_00405	SH03_00390, ,psos,Nucleotide-binding protein DBV13_00405	TP1_03470, ,psos,Nucleotide-binding protein DBV13_00405	TP2_09465, ,psos,Nucleotide-binding protein DBV13_00405	TP3_03215, ,psos,Nucleotide-binding protein DBV13_00405	TP4_01435, ,psos,Nucleotide-binding protein DBV13_00405	TP4479_09560, ,psos,Nucleotide-binding protein DBV13_00405	TP8_05575, ,psos,Nucleotide-binding protein DBV13_00405	TP_2849_00615, ,psos,Nucleotide-binding protein DBV13_00405	UFV1_02700, ,psos,Nucleotide-binding protein DBV13_00405,IDENTICAL PARALOGS:,UFV1_03680,Nucleotide-binding protein DBV13_00405	jx18_03215, ,psos,Nucleotide-binding protein DBV13_00405
80	TP6375_00415, ,psos,Putative gluconeogenesis factor	2012CQ_ZSH_08090, ,psos,Putative gluconeogenesis factor	Arash114_00410, ,psos,Putative gluconeogenesis factor	Bu5_05405, ,psos,Putative gluconeogenesis factor	DSM_20630_02690, ,psos,Putative gluconeogenesis factor	MS249_05920, ,psos,Putative gluconeogenesis factor	NCTC5224_05085, ,psos,Putative gluconeogenesis factor	SH01_09340, ,psos,Putative gluconeogenesis factor	SH02_05865, ,psos,Putative gluconeogenesis factor	SH03_00395, ,psos,Putative gluconeogenesis factor	TP1_03465, ,psos,Putative gluconeogenesis factor	TP2_09460, ,psos,Putative gluconeogenesis factor	TP3_03220, ,psos,Putative gluconeogenesis factor	TP4_01430, ,psos,Putative gluconeogenesis factor	TP4479_09565, ,psos,Putative gluconeogenesis factor	TP8_05570, ,psos,Putative gluconeogenesis factor	TP_2849_00620, ,psos,Putative gluconeogenesis factor	UFV1_02705, ,psos,Putative gluconeogenesis factor,IDENTICAL PARALOGS:,UFV1_03685,Putative gluconeogenesis factor	jx18_03210, ,psos,Putative gluconeogenesis factor
81	TP6375_00420, ,psos,Probable cell division protein WhiA	2012CQ_ZSH_08095, ,psos,Probable cell division protein WhiA	Arash114_00415, ,psos,Probable cell division protein WhiA	Bu5_05400, ,psos,Probable cell division protein WhiA	DSM_20630_02695, ,psos,Probable cell division protein WhiA	MS249_05925, ,psos,Probable cell division protein WhiA	NCTC5224_05090, ,psos,Probable cell division protein WhiA	SH01_09345, ,psos,Probable cell division protein WhiA	SH02_05870, ,psos,Probable cell division protein WhiA	SH03_00400, ,psos,Probable cell division protein WhiA	TP1_03460, ,psos,Probable cell division protein WhiA	TP2_09455, ,psos,Probable cell division protein WhiA	TP3_03225, ,psos,Probable cell division protein WhiA	TP4_01425, ,psos,Probable cell division protein WhiA	TP4479_09570, ,psos,Probable cell division protein WhiA	TP8_05565, ,psos,Probable cell division protein WhiA	TP_2849_00625, ,psos,Probable cell division protein WhiA	UFV1_02710, ,psos,Probable cell division protein WhiA,IDENTICAL PARALOGS:,UFV1_03690,Probable cell division protein WhiA	jx18_03205, ,psos,Probable cell division protein WhiA
82	TP6375_00425, ,psos,Glyceraldehyde-3-phosphate dehydrogenase	2012CQ_ZSH_08100, ,psos,Glyceraldehyde-3-phosphate dehydrogenase	Arash114_00420, ,psos,Glyceraldehyde-3-phosphate dehydrogenase	Bu5_05395, ,psos,Glyceraldehyde-3-phosphate dehydrogenase	DSM_20630_02700, ,psos,Glyceraldehyde-3-phosphate dehydrogenase	MS249_05930, ,psos,Glyceraldehyde-3-phosphate dehydrogenase	NCTC5224_05095, ,psos,Glyceraldehyde-3-phosphate dehydrogenase	SH01_09350, ,psos,Glyceraldehyde-3-phosphate dehydrogenase	SH02_05875, ,psos,Glyceraldehyde-3-phosphate dehydrogenase	SH03_00405, ,psos,Glyceraldehyde-3-phosphate dehydrogenase	TP1_03455, ,psos,Glyceraldehyde-3-phosphate dehydrogenase	TP2_09450, ,psos,Glyceraldehyde-3-phosphate dehydrogenase	TP3_03230, ,psos,Glyceraldehyde-3-phosphate dehydrogenase	TP4_01420, ,psos,Glyceraldehyde-3-phosphate dehydrogenase	TP4479_09575, ,psos,Glyceraldehyde-3-phosphate dehydrogenase	TP8_05560, ,psos,Glyceraldehyde-3-phosphate dehydrogenase	TP_2849_00630, ,psos,Glyceraldehyde-3-phosphate dehydrogenase	UFV1_02715, ,psos,Glyceraldehyde-3-phosphate dehydrogenase,IDENTICAL PARALOGS:,UFV1_03695,Glyceraldehyde-3-phosphate dehydrogenase	jx18_03200, ,psos,Glyceraldehyde-3-phosphate dehydrogenase
83	TP6375_00430, ,psos,Phosphoglycerate kinase	2012CQ_ZSH_08105, ,psos,Phosphoglycerate kinase	Arash114_00425, ,psos,Phosphoglycerate kinase	Bu5_05390, ,psos,Phosphoglycerate kinase	DSM_20630_02705, ,psos,Phosphoglycerate kinase	MS249_05935, ,psos,Phosphoglycerate kinase	NCTC5224_05100, ,psos,Phosphoglycerate kinase	SH01_09355, ,psos,Phosphoglycerate kinase	SH02_05880, ,psos,Phosphoglycerate kinase	SH03_00410, ,psos,Phosphoglycerate kinase	TP1_03450, ,psos,Phosphoglycerate kinase	TP2_09445, ,psos,Phosphoglycerate kinase	TP3_03235, ,psos,Phosphoglycerate kinase	TP4_01415, ,psos,Phosphoglycerate kinase	TP4479_09580, ,psos,Phosphoglycerate kinase	TP8_05555, ,psos,Phosphoglycerate kinase	TP_2849_00635, ,psos,Phosphoglycerate kinase	UFV1_02720, ,psos,Phosphoglycerate kinase,IDENTICAL PARALOGS:,UFV1_03700,Phosphoglycerate kinase	jx18_03195, ,psos,Phosphoglycerate kinase
84	TP6375_00435, ,psos,Triosephosphate isomerase	2012CQ_ZSH_08110, ,psos,Triosephosphate isomerase	Arash114_00430, ,psos,Triosephosphate isomerase	Bu5_05385, ,psos,Triosephosphate isomerase	DSM_20630_02710, ,psos,Triosephosphate isomerase	MS249_05940, ,psos,Triosephosphate isomerase	NCTC5224_05105, ,psos,Triosephosphate isomerase	SH01_09360, ,psos,Triosephosphate isomerase	SH02_05885, ,psos,Triosephosphate isomerase	SH03_00415, ,psos,Triosephosphate isomerase	TP1_03445, ,psos,Triosephosphate isomerase	TP2_09440, ,psos,Triosephosphate isomerase	TP3_03240, ,psos,Triosephosphate isomerase	TP4_01410, ,psos,Triosephosphate isomerase	TP4479_09585, ,psos,Triosephosphate isomerase	TP8_05550, ,psos,Triosephosphate isomerase	TP_2849_00640, ,psos,Triosephosphate isomerase	UFV1_02725, ,psos,Triosephosphate isomerase,IDENTICAL PARALOGS:,UFV1_03705,Triosephosphate isomerase	jx18_03190, ,psos,Triosephosphate isomerase
85	TP6375_00440, ,psos,Protein-export membrane protein SecG	2012CQ_ZSH_08115, ,psos,Protein-export membrane protein SecG	Arash114_00435, ,psos,Protein-export membrane protein SecG	Bu5_05380, ,psos,Protein-export membrane protein SecG	DSM_20630_02715, ,psos,Protein-export membrane protein SecG	MS249_05945, ,psos,Protein-export membrane protein SecG	NCTC5224_05110, ,psos,Protein-export membrane protein SecG	SH01_09365, ,psos,Protein-export membrane protein SecG	SH02_05890, ,psos,Protein-export membrane protein SecG	SH03_00420, ,psos,Protein-export membrane protein SecG	TP1_03440, ,psos,Protein-export membrane protein SecG	TP2_09435, ,psos,Protein-export membrane protein SecG	TP3_03245, ,psos,Protein-export membrane protein SecG	TP4_01405, ,psos,Protein-export membrane protein SecG	TP4479_09590, ,psos,Protein-export membrane protein SecG	TP8_05545, ,psos,Protein-export membrane protein SecG	TP_2849_00645, ,psos,Protein-export membrane protein SecG	UFV1_02730, ,psos,Protein-export membrane protein SecG,IDENTICAL PARALOGS:,UFV1_03710,Protein-export membrane protein SecG	jx18_03185, ,psos,Protein-export membrane protein SecG
86	TP6375_00445, ,psos,Glucose-6-P dehydrogenase subunit	2012CQ_ZSH_08120, ,psos,Glucose-6-P dehydrogenase subunit	Arash114_00440, ,psos,Glucose-6-P dehydrogenase subunit	Bu5_05375, ,psos,Glucose-6-P dehydrogenase subunit	DSM_20630_02720, ,psos,Glucose-6-P dehydrogenase subunit	MS249_05950, ,psos,Glucose-6-P dehydrogenase subunit	NCTC5224_05115, ,psos,Glucose-6-P dehydrogenase subunit	SH01_09370, ,psos,Glucose-6-P dehydrogenase subunit	SH02_05895, ,psos,Glucose-6-P dehydrogenase subunit	SH03_00425, ,psos,Glucose-6-P dehydrogenase subunit	TP1_03435, ,psos,Glucose-6-P dehydrogenase subunit	TP2_09430, ,psos,Glucose-6-P dehydrogenase subunit	TP3_03250, ,psos,Glucose-6-P dehydrogenase subunit	TP4_01400, ,psos,Glucose-6-P dehydrogenase subunit	TP4479_09595, ,psos,Glucose-6-P dehydrogenase subunit	TP8_05540, ,psos,Glucose-6-P dehydrogenase subunit	TP_2849_00650, ,psos,Glucose-6-P dehydrogenase subunit	UFV1_02735, ,psos,Glucose-6-P dehydrogenase subunit,IDENTICAL PARALOGS:,UFV1_03715,Glucose-6-P dehydrogenase subunit	jx18_03180, ,psos,Glucose-6-P dehydrogenase subunit
87	TP6375_00450, ,psos,Glucose-6-phosphate 1-dehydrogenase	2012CQ_ZSH_08125, ,psos,Glucose-6-phosphate 1-dehydrogenase	Arash114_00445, ,psos,Glucose-6-phosphate 1-dehydrogenase	Bu5_05370, ,psos,Glucose-6-phosphate 1-dehydrogenase	DSM_20630_02725, ,psos,Glucose-6-phosphate 1-dehydrogenase	MS249_05955, ,psos,Glucose-6-phosphate 1-dehydrogenase	NCTC5224_05120, ,psos,Glucose-6-phosphate 1-dehydrogenase	SH01_09375, ,psos,Glucose-6-phosphate 1-dehydrogenase	SH02_05900, ,psos,Glucose-6-phosphate 1-dehydrogenase	SH03_00430, ,psos,Glucose-6-phosphate 1-dehydrogenase	TP1_03430, ,psos,Glucose-6-phosphate 1-dehydrogenase	TP2_09425, ,psos,Glucose-6-phosphate 1-dehydrogenase	TP3_03255, ,psos,Glucose-6-phosphate 1-dehydrogenase	TP4_01395, ,psos,Glucose-6-phosphate 1-dehydrogenase	TP4479_09600, ,psos,Glucose-6-phosphate 1-dehydrogenase	TP8_05535, ,psos,Glucose-6-phosphate 1-dehydrogenase	TP_2849_00655, ,psos,Glucose-6-phosphate 1-dehydrogenase	UFV1_02740, ,psos,Glucose-6-phosphate 1-dehydrogenase,IDENTICAL PARALOGS:,UFV1_03720,Glucose-6-phosphate 1-dehydrogenase	jx18_03175, ,psos,Glucose-6-phosphate 1-dehydrogenase
88	TP6375_00455, ,psos,Transaldolase	2012CQ_ZSH_08130, ,psos,Transaldolase	Arash114_00450, ,psos,Transaldolase	Bu5_05365, ,psos,Transaldolase	DSM_20630_02730, ,psos,Transaldolase	MS249_05960, ,psos,Transaldolase	NCTC5224_05125, ,psos,Transaldolase	SH01_09380, ,psos,Transaldolase	SH02_05905, ,psos,Transaldolase	SH03_00435, ,psos,Transaldolase	TP1_03425, ,psos,Transaldolase	TP2_09420, ,psos,Transaldolase	TP3_03260, ,psos,Transaldolase	TP4_01390, ,psos,Transaldolase	TP4479_09605, ,psos,Transaldolase	TP8_05530, ,psos,Transaldolase	TP_2849_00660, ,psos,Transaldolase	UFV1_02745, ,psos,Transaldolase,IDENTICAL PARALOGS:,UFV1_03725,Transaldolase	jx18_03170, ,psos,Transaldolase
89	TP6375_00460, ,psos,Transketolase	2012CQ_ZSH_08135, ,psos,Transketolase	Arash114_00455, ,psos,Transketolase	Bu5_05360, ,psos,Transketolase	DSM_20630_02735, ,psos,Transketolase	MS249_05965, ,psos,Transketolase	NCTC5224_05130, ,psos,Transketolase	SH01_09385, ,psos,Transketolase	SH02_05910, ,psos,Transketolase	SH03_00440, ,psos,Transketolase	TP1_03420, ,psos,Transketolase	TP2_09415, ,psos,Transketolase	TP3_03265, ,psos,Transketolase	TP4_01385, ,psos,Transketolase	TP4479_09610, ,psos,Transketolase	TP8_05525, ,psos,Transketolase	TP_2849_00665, ,psos,Transketolase	UFV1_02750, ,psos,Transketolase,IDENTICAL PARALOGS:,UFV1_03730,Transketolase	jx18_03165, ,psos,Transketolase
90	TP6375_00465, ,psos,Tyrosine recombinase XerC	2012CQ_ZSH_08140, ,psos,Tyrosine recombinase XerC	Arash114_00460, ,psos,Tyrosine recombinase XerC	Bu5_05355, ,psos,Tyrosine recombinase XerC	DSM_20630_02740, ,psos,Tyrosine recombinase XerC	MS249_05970, ,psos,Tyrosine recombinase XerC	NCTC5224_05135, ,psos,Tyrosine recombinase XerC	SH01_09390, ,psos,Tyrosine recombinase XerC	SH02_05915, ,psos,Tyrosine recombinase XerC	SH03_00445, ,psos,Tyrosine recombinase XerC	TP1_03415, ,psos,Tyrosine recombinase XerC	TP2_09410, ,psos,Tyrosine recombinase XerC	TP3_03270, ,psos,Tyrosine recombinase XerC	TP4_01380, ,psos,Tyrosine recombinase XerC	TP4479_09615, ,psos,Tyrosine recombinase XerC	TP8_05520, ,psos,Tyrosine recombinase XerC	TP_2849_00670, ,psos,Tyrosine recombinase XerC	UFV1_02755, ,psos,Tyrosine recombinase XerC,IDENTICAL PARALOGS:,UFV1_03735,Tyrosine recombinase XerC	jx18_03160, ,psos,Tyrosine recombinase XerC
91	TP6375_00470, ,psos,Sporulation initiation inhibitor protein Soj	2012CQ_ZSH_08145, ,psos,Sporulation initiation inhibitor protein Soj	Arash114_00465, ,psos,Sporulation initiation inhibitor protein Soj	Bu5_05350, ,psos,Sporulation initiation inhibitor protein Soj	DSM_20630_02745, ,psos,Sporulation initiation inhibitor protein Soj	MS249_05975, ,psos,Sporulation initiation inhibitor protein Soj	NCTC5224_05140, ,psos,Sporulation initiation inhibitor protein Soj	SH01_09395, ,psos,Sporulation initiation inhibitor protein Soj	SH02_05920, ,psos,Sporulation initiation inhibitor protein Soj	SH03_00450, ,psos,Sporulation initiation inhibitor protein Soj	TP1_03410, ,psos,Sporulation initiation inhibitor protein Soj	TP2_09405, ,psos,Sporulation initiation inhibitor protein Soj	TP3_03275, ,psos,Sporulation initiation inhibitor protein Soj	TP4_01375, ,psos,Sporulation initiation inhibitor protein Soj	TP4479_09620, ,psos,Sporulation initiation inhibitor protein Soj	TP8_05515, ,psos,Sporulation initiation inhibitor protein Soj	TP_2849_00675, ,psos,Sporulation initiation inhibitor protein Soj	UFV1_02760, ,psos,Sporulation initiation inhibitor protein Soj,IDENTICAL PARALOGS:,UFV1_03740,Sporulation initiation inhibitor protein Soj	jx18_03155, ,psos,Sporulation initiation inhibitor protein Soj
92	TP6375_00475, ,psos,Segregation and condensation protein A	2012CQ_ZSH_08150, ,psos,Segregation and condensation protein A	Arash114_00470, ,psos,Segregation and condensation protein A	Bu5_05345, ,psos,Segregation and condensation protein A	DSM_20630_02750, ,psos,Segregation and condensation protein A	MS249_05980, ,psos,Segregation and condensation protein A	NCTC5224_05145, ,psos,Segregation and condensation protein A	SH01_09400, ,psos,Segregation and condensation protein A	SH02_05925, ,psos,Segregation and condensation protein A	SH03_00455, ,psos,Segregation and condensation protein A	TP1_03405, ,psos,Segregation and condensation protein A	TP2_09400, ,psos,Segregation and condensation protein A	TP3_03280, ,psos,Segregation and condensation protein A	TP4_01370, ,psos,Segregation and condensation protein A	TP4479_09625, ,psos,Segregation and condensation protein A	TP8_05510, ,psos,Segregation and condensation protein A	TP_2849_00680, ,psos,Segregation and condensation protein A	UFV1_02765, ,psos,Segregation and condensation protein A,IDENTICAL PARALOGS:,UFV1_03745,Segregation and condensation protein A	jx18_03150, ,psos,Segregation and condensation protein A
93	TP6375_00480, ,psos,SMC-Scp complex subunit ScpB	2012CQ_ZSH_08155, ,psos,SMC-Scp complex subunit ScpB	Arash114_00475, ,psos,SMC-Scp complex subunit ScpB	Bu5_05340, ,psos,SMC-Scp complex subunit ScpB	DSM_20630_02755, ,psos,SMC-Scp complex subunit ScpB	MS249_05985, ,psos,SMC-Scp complex subunit ScpB	NCTC5224_05150, ,psos,SMC-Scp complex subunit ScpB	SH01_09405, ,psos,SMC-Scp complex subunit ScpB	SH02_05930, ,psos,SMC-Scp complex subunit ScpB	SH03_00460, ,psos,SMC-Scp complex subunit ScpB	TP1_03400, ,psos,SMC-Scp complex subunit ScpB	TP2_09395, ,psos,SMC-Scp complex subunit ScpB	TP3_03285, ,psos,SMC-Scp complex subunit ScpB	TP4_01365, ,psos,SMC-Scp complex subunit ScpB	TP4479_09630, ,psos,SMC-Scp complex subunit ScpB	TP8_05505, ,psos,SMC-Scp complex subunit ScpB	TP_2849_00685, ,psos,SMC-Scp complex subunit ScpB	UFV1_02770, ,psos,SMC-Scp complex subunit ScpB,IDENTICAL PARALOGS:,UFV1_03750,SMC-Scp complex subunit ScpB	jx18_03145, ,psos,SMC-Scp complex subunit ScpB
94	TP6375_00485, ,psos,Pseudouridine synthase	2012CQ_ZSH_08160, ,psos,Pseudouridine synthase	Arash114_00480, ,psos,Pseudouridine synthase	Bu5_05335, ,psos,Pseudouridine synthase	DSM_20630_02760, ,psos,Pseudouridine synthase	MS249_05990, ,psos,Pseudouridine synthase	NCTC5224_05155, ,psos,Pseudouridine synthase	SH01_09410, ,psos,Pseudouridine synthase	SH02_05935, ,psos,Pseudouridine synthase	SH03_00465, ,psos,Pseudouridine synthase	TP1_03395, ,psos,Pseudouridine synthase	TP2_09390, ,psos,Pseudouridine synthase	TP3_03290, ,psos,Pseudouridine synthase	TP4_01360, ,psos,Pseudouridine synthase	TP4479_09635, ,psos,Pseudouridine synthase	TP8_05500, ,psos,Pseudouridine synthase	TP_2849_00690, ,psos,Pseudouridine synthase	UFV1_02775, ,psos,Pseudouridine synthase,IDENTICAL PARALOGS:,UFV1_03755,Pseudouridine synthase	jx18_03140, ,psos,Pseudouridine synthase
95	TP6375_00490, ,psos,Cytidylate kinase	2012CQ_ZSH_08165, ,psos,Cytidylate kinase	Arash114_00485, ,psos,Cytidylate kinase	Bu5_05330, ,psos,Cytidylate kinase	DSM_20630_02765, ,psos,Cytidylate kinase	MS249_05995, ,psos,Cytidylate kinase	NCTC5224_05160, ,psos,Cytidylate kinase	SH01_09415, ,psos,Cytidylate kinase	SH02_05940, ,psos,Cytidylate kinase	SH03_00470, ,psos,Cytidylate kinase	TP1_03390, ,psos,Cytidylate kinase	TP2_09385, ,psos,Cytidylate kinase	TP3_03295, ,psos,Cytidylate kinase	TP4_01355, ,psos,Cytidylate kinase	TP4479_09640, ,psos,Cytidylate kinase	TP8_05495, ,psos,Cytidylate kinase	TP_2849_00695, ,psos,Cytidylate kinase	UFV1_02780, ,psos,Cytidylate kinase,IDENTICAL PARALOGS:,UFV1_03760,Cytidylate kinase	jx18_03135, ,psos,Cytidylate kinase
96	TP6375_00495, ,psos,GTPase Der	2012CQ_ZSH_08170, ,psos,GTPase Der	Arash114_00490, ,psos,GTPase Der	Bu5_05325, ,psos,GTPase Der	DSM_20630_02770, ,psos,GTPase Der	MS249_06000, ,psos,GTPase Der	NCTC5224_05165, ,psos,GTPase Der	SH01_09420, ,psos,GTPase Der	SH02_05945, ,psos,GTPase Der	SH03_00475, ,psos,GTPase Der	TP1_03385, ,psos,GTPase Der	TP2_09380, ,psos,GTPase Der	TP3_03300, ,psos,GTPase Der	TP4_01350, ,psos,GTPase Der	TP4479_09645, ,psos,GTPase Der	TP8_05490, ,psos,GTPase Der	TP_2849_00700, ,psos,GTPase Der	UFV1_02785, ,psos,GTPase Der,IDENTICAL PARALOGS:,UFV1_03765,GTPase Der	jx18_03130, ,psos,GTPase Der
97	TP6375_00500, ,psos,ATP-dependent 6-phosphofructokinase	2012CQ_ZSH_08175, ,psos,ATP-dependent 6-phosphofructokinase	Arash114_00495, ,psos,ATP-dependent 6-phosphofructokinase	Bu5_05320, ,psos,ATP-dependent 6-phosphofructokinase	DSM_20630_02775, ,psos,ATP-dependent 6-phosphofructokinase	MS249_06005, ,psos,ATP-dependent 6-phosphofructokinase	NCTC5224_05170, ,psos,ATP-dependent 6-phosphofructokinase	SH01_09425, ,psos,ATP-dependent 6-phosphofructokinase	SH02_05950, ,psos,ATP-dependent 6-phosphofructokinase	SH03_00480, ,psos,ATP-dependent 6-phosphofructokinase	TP1_03380, ,psos,ATP-dependent 6-phosphofructokinase	TP2_09375, ,psos,ATP-dependent 6-phosphofructokinase	TP3_03305, ,psos,ATP-dependent 6-phosphofructokinase	TP4_01345, ,psos,ATP-dependent 6-phosphofructokinase	TP4479_09650, ,psos,ATP-dependent 6-phosphofructokinase	TP8_05485, ,psos,ATP-dependent 6-phosphofructokinase	TP_2849_00705, ,psos,ATP-dependent 6-phosphofructokinase	UFV1_02790, ,psos,ATP-dependent 6-phosphofructokinase,IDENTICAL PARALOGS:,UFV1_03770,ATP-dependent 6-phosphofructokinase	jx18_03125, ,psos,ATP-dependent 6-phosphofructokinase
98	TP6375_00510, ,psos,Alanine aminopeptidase	2012CQ_ZSH_08190, ,psos,Alanine aminopeptidase	Arash114_00505, ,psos,Alanine aminopeptidase	Bu5_05310, ,psos,Alanine aminopeptidase	DSM_20630_02790, ,psos,Alanine aminopeptidase	MS249_06015, ,psos,Alanine aminopeptidase	NCTC5224_05185, ,psos,Alanine aminopeptidase	SH01_09440, ,psos,Alanine aminopeptidase	SH02_05965, ,psos,Alanine aminopeptidase	SH03_00495, ,psos,Alanine aminopeptidase	TP1_03370, ,psos,Alanine aminopeptidase	TP2_09360, ,psos,Alanine aminopeptidase	TP3_03320, ,psos,Alanine aminopeptidase	TP4_01330, ,psos,Alanine aminopeptidase	TP4479_09665, ,psos,Alanine aminopeptidase	TP8_05470, ,psos,hypothetical protein	TP_2849_00720, ,psos,Alanine aminopeptidase	UFV1_02800, ,psos,Alanine aminopeptidase,IDENTICAL PARALOGS:,UFV1_03780,Alanine aminopeptidase	jx18_03110, ,psos,Alanine aminopeptidase
99	TP6375_00515, ,psos,Glycogen accumulation regulator GarA	2012CQ_ZSH_08195, ,psos,Glycogen accumulation regulator GarA	Arash114_00510, ,psos,Glycogen accumulation regulator GarA	Bu5_05305, ,psos,Glycogen accumulation regulator GarA	DSM_20630_02795, ,psos,Glycogen accumulation regulator GarA	MS249_06020, ,psos,Glycogen accumulation regulator GarA	NCTC5224_05190, ,psos,Glycogen accumulation regulator GarA	SH01_09445, ,psos,Glycogen accumulation regulator GarA	SH02_05970, ,psos,Glycogen accumulation regulator GarA	SH03_00500, ,psos,Glycogen accumulation regulator GarA	TP1_03365, ,psos,Glycogen accumulation regulator GarA	TP2_09355, ,psos,Glycogen accumulation regulator GarA	TP3_03325, ,psos,Glycogen accumulation regulator GarA	TP4_01325, ,psos,Glycogen accumulation regulator GarA	TP4479_09670, ,psos,Glycogen accumulation regulator GarA	TP8_05690, ,psos,Glycogen accumulation regulator GarA	TP_2849_00725, ,psos,Glycogen accumulation regulator GarA	UFV1_02805, ,psos,Glycogen accumulation regulator GarA,IDENTICAL PARALOGS:,UFV1_03785,Glycogen accumulation regulator GarA	jx18_03105, ,psos,Glycogen accumulation regulator GarA
100	TP6375_00520, ,psos,HTH-type transcriptional regulator glnR	2012CQ_ZSH_08200, ,psos,HTH-type transcriptional regulator glnR	Arash114_00515, ,psos,HTH-type transcriptional regulator glnR	Bu5_05300, ,psos,HTH-type transcriptional regulator glnR	DSM_20630_02800, ,psos,HTH-type transcriptional regulator glnR	MS249_06025, ,psos,HTH-type transcriptional regulator glnR	NCTC5224_05195, ,psos,HTH-type transcriptional regulator glnR	SH01_09450, ,psos,HTH-type transcriptional regulator glnR	SH02_05975, ,psos,HTH-type transcriptional regulator glnR	SH03_00505, ,psos,HTH-type transcriptional regulator glnR	TP1_03360, ,psos,HTH-type transcriptional regulator glnR	TP2_09350, ,psos,HTH-type transcriptional regulator glnR	TP3_03330, ,psos,HTH-type transcriptional regulator glnR	TP4_01320, ,psos,HTH-type transcriptional regulator glnR	TP4479_09675, ,psos,HTH-type transcriptional regulator glnR	TP8_05695, ,psos,HTH-type transcriptional regulator glnR	TP_2849_00730, ,psos,HTH-type transcriptional regulator glnR	UFV1_02810, ,psos,HTH-type transcriptional regulator glnR,IDENTICAL PARALOGS:,UFV1_03790,HTH-type transcriptional regulator glnR	jx18_03100, ,psos,HTH-type transcriptional regulator glnR
101	TP6375_00525, ,psos,HTH-type transcriptional regulator HmrR	2012CQ_ZSH_08205, ,psos,HTH-type transcriptional regulator HmrR	Arash114_00520, ,psos,HTH-type transcriptional regulator HmrR	Bu5_05295, ,psos,HTH-type transcriptional regulator HmrR	DSM_20630_02805, ,psos,HTH-type transcriptional regulator HmrR	MS249_06030, ,psos,HTH-type transcriptional regulator HmrR	NCTC5224_05200, ,psos,HTH-type transcriptional regulator HmrR	SH01_09455, ,psos,HTH-type transcriptional regulator HmrR	SH02_05980, ,psos,HTH-type transcriptional regulator HmrR	SH03_00510, ,psos,HTH-type transcriptional regulator HmrR	TP1_03355, ,psos,HTH-type transcriptional regulator HmrR	TP2_09345, ,psos,HTH-type transcriptional regulator HmrR	TP3_03335, ,psos,HTH-type transcriptional regulator HmrR	TP4_01315, ,psos,HTH-type transcriptional regulator HmrR	TP4479_09680, ,psos,HTH-type transcriptional regulator HmrR	TP8_05700, ,psos,HTH-type transcriptional regulator HmrR	TP_2849_00735, ,psos,HTH-type transcriptional regulator HmrR	UFV1_02815, ,psos,HTH-type transcriptional regulator HmrR,IDENTICAL PARALOGS:,UFV1_03795,HTH-type transcriptional regulator HmrR	jx18_03095, ,psos,HTH-type transcriptional regulator HmrR
102	TP6375_00530, ,psos,hypothetical protein	2012CQ_ZSH_08210, ,psos,hypothetical protein	Arash114_00525, ,psos,hypothetical protein	Bu5_05290, ,psos,hypothetical protein	DSM_20630_02810, ,psos,hypothetical protein	MS249_06035, ,psos,hypothetical protein	NCTC5224_05205, ,psos,hypothetical protein	SH01_09460, ,psos,hypothetical protein	SH02_05985, ,psos,hypothetical protein	SH03_00515, ,psos,hypothetical protein	TP1_03350, ,psos,hypothetical protein	TP2_09340, ,psos,hypothetical protein	TP3_03340, ,psos,hypothetical protein	TP4_01310, ,psos,hypothetical protein	TP4479_09685, ,psos,hypothetical protein	TP8_05705, ,psos,hypothetical protein	TP_2849_00740, ,psos,hypothetical protein	UFV1_02820, ,psos,hypothetical protein,IDENTICAL PARALOGS:,UFV1_03800,hypothetical protein	jx18_03090, ,psos,hypothetical protein
103	TP6375_00535, ,psos,RNA polymerase-binding protein RbpA	2012CQ_ZSH_08215, ,psos,RNA polymerase-binding protein RbpA	Arash114_00530, ,psos,RNA polymerase-binding protein RbpA	Bu5_05285, ,psos,RNA polymerase-binding protein RbpA	DSM_20630_02815, ,psos,RNA polymerase-binding protein RbpA	MS249_06040, ,psos,RNA polymerase-binding protein RbpA	NCTC5224_05210, ,psos,RNA polymerase-binding protein RbpA	SH01_09465, ,psos,RNA polymerase-binding protein RbpA	SH02_05990, ,psos,RNA polymerase-binding protein RbpA	SH03_00520, ,psos,RNA polymerase-binding protein RbpA	TP1_03345, ,psos,RNA polymerase-binding protein RbpA	TP2_09335, ,psos,RNA polymerase-binding protein RbpA	TP3_03345, ,psos,RNA polymerase-binding protein RbpA	TP4_01305, ,psos,RNA polymerase-binding protein RbpA	TP4479_09690, ,psos,RNA polymerase-binding protein RbpA	TP8_05710, ,psos,RNA polymerase-binding protein RbpA	TP_2849_00745, ,psos,RNA polymerase-binding protein RbpA	UFV1_02825, ,psos,RNA polymerase-binding protein RbpA,IDENTICAL PARALOGS:,UFV1_03805,RNA polymerase-binding protein RbpA	jx18_03085, ,psos,RNA polymerase-binding protein RbpA
104	TP6375_00540, ,psos,Undecaprenyl-phosphate 4-deoxy-4-formamido-L-arabinose transferase	2012CQ_ZSH_08220, ,psos,Undecaprenyl-phosphate 4-deoxy-4-formamido-L-arabinose transferase	Arash114_00535, ,psos,Undecaprenyl-phosphate 4-deoxy-4-formamido-L-arabinose transferase	Bu5_05280, ,psos,Undecaprenyl-phosphate 4-deoxy-4-formamido-L-arabinose transferase	DSM_20630_02820, ,psos,Undecaprenyl-phosphate 4-deoxy-4-formamido-L-arabinose transferase	MS249_06045, ,psos,Undecaprenyl-phosphate 4-deoxy-4-formamido-L-arabinose transferase	NCTC5224_05215, ,psos,Undecaprenyl-phosphate 4-deoxy-4-formamido-L-arabinose transferase	SH01_09470, ,psos,Undecaprenyl-phosphate 4-deoxy-4-formamido-L-arabinose transferase	SH02_05995, ,psos,Undecaprenyl-phosphate 4-deoxy-4-formamido-L-arabinose transferase	SH03_00525, ,psos,Undecaprenyl-phosphate 4-deoxy-4-formamido-L-arabinose transferase	TP1_03340, ,psos,Undecaprenyl-phosphate 4-deoxy-4-formamido-L-arabinose transferase	TP2_09330, ,psos,Undecaprenyl-phosphate 4-deoxy-4-formamido-L-arabinose transferase	TP3_03350, ,psos,Undecaprenyl-phosphate 4-deoxy-4-formamido-L-arabinose transferase	TP4_01300, ,psos,Undecaprenyl-phosphate 4-deoxy-4-formamido-L-arabinose transferase	TP4479_09695, ,psos,Undecaprenyl-phosphate 4-deoxy-4-formamido-L-arabinose transferase	TP8_05715, ,psos,Undecaprenyl-phosphate 4-deoxy-4-formamido-L-arabinose transferase	TP_2849_00750, ,psos,Undecaprenyl-phosphate 4-deoxy-4-formamido-L-arabinose transferase	UFV1_02830, ,psos,Undecaprenyl-phosphate 4-deoxy-4-formamido-L-arabinose transferase,IDENTICAL PARALOGS:,UFV1_03810,Undecaprenyl-phosphate 4-deoxy-4-formamido-L-arabinose transferase	jx18_03080, ,psos,Undecaprenyl-phosphate 4-deoxy-4-formamido-L-arabinose transferase
105	TP6375_00545, ,psos,Apolipoprotein N-acyltransferase	2012CQ_ZSH_08225, ,psos,Apolipoprotein N-acyltransferase	Arash114_00540, ,psos,Apolipoprotein N-acyltransferase	Bu5_05275, ,psos,Apolipoprotein N-acyltransferase	DSM_20630_02825, ,psos,Apolipoprotein N-acyltransferase	MS249_06050, ,psos,Apolipoprotein N-acyltransferase	NCTC5224_05220, ,psos,Apolipoprotein N-acyltransferase	SH01_09475, ,psos,Apolipoprotein N-acyltransferase	SH02_06000, ,psos,Apolipoprotein N-acyltransferase	SH03_00530, ,psos,Apolipoprotein N-acyltransferase	TP1_03335, ,psos,Apolipoprotein N-acyltransferase	TP2_09325, ,psos,Apolipoprotein N-acyltransferase	TP3_03355, ,psos,Apolipoprotein N-acyltransferase	TP4_01295, ,psos,Apolipoprotein N-acyltransferase	TP4479_09700, ,psos,Apolipoprotein N-acyltransferase	TP8_05720, ,psos,Apolipoprotein N-acyltransferase	TP_2849_00755, ,psos,Apolipoprotein N-acyltransferase	UFV1_02835, ,psos,Apolipoprotein N-acyltransferase,IDENTICAL PARALOGS:,UFV1_03815,Apolipoprotein N-acyltransferase	jx18_03075, ,psos,Apolipoprotein N-acyltransferase
106	TP6375_00550, ,psos,DEAD/DEAH box helicase	2012CQ_ZSH_08230, ,psos,DEAD/DEAH box helicase	Arash114_00545, ,psos,DEAD/DEAH box helicase	Bu5_05270, ,psos,DEAD/DEAH box helicase	DSM_20630_02830, ,psos,DEAD/DEAH box helicase	MS249_06055, ,psos,DEAD/DEAH box helicase	NCTC5224_05225, ,psos,DEAD/DEAH box helicase	SH01_09480, ,psos,DEAD/DEAH box helicase	SH02_06005, ,psos,DEAD/DEAH box helicase	SH03_00535, ,psos,DEAD/DEAH box helicase	TP1_03330, ,psos,DEAD/DEAH box helicase	TP2_09320, ,psos,DEAD/DEAH box helicase	TP3_03360, ,psos,DEAD/DEAH box helicase	TP4_01290, ,psos,DEAD/DEAH box helicase	TP4479_09705, ,psos,DEAD/DEAH box helicase	TP8_05725, ,psos,DEAD/DEAH box helicase	TP_2849_00760, ,psos,DEAD/DEAH box helicase	UFV1_02840, ,psos,DEAD/DEAH box helicase,IDENTICAL PARALOGS:,UFV1_03820,DEAD/DEAH box helicase	jx18_03070, ,psos,DEAD/DEAH box helicase
107	TP6375_00555, ,psos,Diacylglycerol kinase	2012CQ_ZSH_08235, ,psos,Diacylglycerol kinase	Arash114_00550, ,psos,Diacylglycerol kinase	Bu5_05265, ,psos,Diacylglycerol kinase	DSM_20630_02835, ,psos,Diacylglycerol kinase	MS249_06060, ,psos,Diacylglycerol kinase	NCTC5224_05230, ,psos,Diacylglycerol kinase	SH01_09485, ,psos,Diacylglycerol kinase	SH02_06010, ,psos,Diacylglycerol kinase	SH03_00540, ,psos,Diacylglycerol kinase	TP1_03325, ,psos,Diacylglycerol kinase	TP2_09315, ,psos,Diacylglycerol kinase	TP3_03365, ,psos,Diacylglycerol kinase	TP4_01285, ,psos,Diacylglycerol kinase	TP4479_09710, ,psos,Diacylglycerol kinase	TP8_05730, ,psos,Diacylglycerol kinase	TP_2849_00765, ,psos,Diacylglycerol kinase	UFV1_02845, ,psos,Diacylglycerol kinase,IDENTICAL PARALOGS:,UFV1_03825,Diacylglycerol kinase	jx18_03065, ,psos,Diacylglycerol kinase
108	TP6375_00560, ,psos,hypothetical protein	2012CQ_ZSH_08240, ,psos,hypothetical protein	Arash114_00555, ,psos,hypothetical protein	Bu5_05260, ,psos,hypothetical protein	DSM_20630_02840, ,psos,hypothetical protein	MS249_06065, ,psos,hypothetical protein	NCTC5224_05235, ,psos,hypothetical protein	SH01_09490, ,psos,hypothetical protein	SH02_06015, ,psos,hypothetical protein	SH03_00545, ,psos,hypothetical protein	TP1_03320, ,psos,hypothetical protein	TP2_09310, ,psos,hypothetical protein	TP3_03370, ,psos,hypothetical protein	TP4_01280, ,psos,hypothetical protein	TP4479_09715, ,psos,hypothetical protein	TP8_05735, ,psos,hypothetical protein	TP_2849_00770, ,psos,hypothetical protein	UFV1_02850, ,psos,hypothetical protein,IDENTICAL PARALOGS:,UFV1_03830,hypothetical protein	jx18_03060, ,psos,hypothetical protein
109	TP6375_00565, ,psos,WYL domain-containing protein	2012CQ_ZSH_08245, ,psos,WYL domain-containing protein	Arash114_00560, ,psos,WYL domain-containing protein	Bu5_05255, ,psos,WYL domain-containing protein	DSM_20630_02845, ,psos,WYL domain-containing protein	MS249_06070, ,psos,WYL domain-containing protein	NCTC5224_05240, ,psos,WYL domain-containing protein	SH01_09495, ,psos,WYL domain-containing protein	SH02_06020, ,psos,WYL domain-containing protein	SH03_00550, ,psos,WYL domain-containing protein	TP1_03315, ,psos,WYL domain-containing protein	TP2_09305, ,psos,WYL domain-containing protein	TP3_03375, ,psos,WYL domain-containing protein	TP4_01275, ,psos,WYL domain-containing protein	TP4479_09720, ,psos,WYL domain-containing protein	TP8_05740, ,psos,WYL domain-containing protein	TP_2849_00775, ,psos,WYL domain-containing protein	UFV1_02855, ,psos,WYL domain-containing protein,IDENTICAL PARALOGS:,UFV1_03835,WYL domain-containing protein	jx18_03055, ,psos,WYL domain-containing protein
110	TP6375_00570, ,psos,WYL domain-containing protein	2012CQ_ZSH_08250, ,psos,WYL domain-containing protein	Arash114_00565, ,psos,WYL domain-containing protein	Bu5_05250, ,psos,WYL domain-containing protein	DSM_20630_02850, ,psos,WYL domain-containing protein	MS249_06075, ,psos,WYL domain-containing protein	NCTC5224_05245, ,psos,WYL domain-containing protein	SH01_09500, ,psos,WYL domain-containing protein	SH02_06025, ,psos,WYL domain-containing protein	SH03_00555, ,psos,WYL domain-containing protein	TP1_03310, ,psos,WYL domain-containing protein	TP2_09300, ,psos,WYL domain-containing protein	TP3_03380, ,psos,WYL domain-containing protein	TP4_01270, ,psos,WYL domain-containing protein	TP4479_09725, ,psos,WYL domain-containing protein	TP8_05745, ,psos,WYL domain-containing protein	TP_2849_00780, ,psos,WYL domain-containing protein	UFV1_02860, ,psos,WYL domain-containing protein,IDENTICAL PARALOGS:,UFV1_03840,WYL domain-containing protein	jx18_03050, ,psos,WYL domain-containing protein
111	TP6375_00575, ,psos,DUF3866 family protein	2012CQ_ZSH_08255, ,psos,DUF3866 family protein	Arash114_00570, ,psos,Protein of unknown function (DUF3866)	Bu5_05245, ,psos,DUF3866 family protein	DSM_20630_02855, ,psos,Protein of uncharacterized function (DUF3866)	MS249_06080, ,psos,Protein of unknown function (DUF3866)	NCTC5224_05250, ,psos,Protein of uncharacterized function (DUF3866)	SH01_09505, ,psos,Protein of unknown function (DUF3866)	SH02_06030, ,psos,DUF3866 family protein	SH03_00560, ,psos,DUF3866 family protein	TP1_03305, ,psos,Protein of unknown function (DUF3866)	TP2_09295, ,psos,Protein of unknown function (DUF3866)	TP3_03385, ,psos,DUF3866 family protein	TP4_01265, ,psos,DUF3866 family protein	TP4479_09730, ,psos,DUF3866 family protein	TP8_05750, ,psos,DUF3866 family protein	TP_2849_00785, ,psos,DUF3866 family protein	UFV1_02865, ,psos,DUF3866 family protein,IDENTICAL PARALOGS:,UFV1_03845,DUF3866 family protein	jx18_03045, ,psos,Protein of unknown function (DUF3866)
112	TP6375_00580, ,psos,ATP phosphoribosyltransferase	2012CQ_ZSH_08260, ,psos,ATP phosphoribosyltransferase	Arash114_00575, ,psos,ATP phosphoribosyltransferase	Bu5_05240, ,psos,ATP phosphoribosyltransferase	DSM_20630_02860, ,psos,ATP phosphoribosyltransferase	MS249_06085, ,psos,ATP phosphoribosyltransferase	NCTC5224_05255, ,psos,ATP phosphoribosyltransferase	SH01_09510, ,psos,ATP phosphoribosyltransferase	SH02_06035, ,psos,ATP phosphoribosyltransferase	SH03_00565, ,psos,ATP phosphoribosyltransferase	TP1_03300, ,psos,ATP phosphoribosyltransferase	TP2_09290, ,psos,ATP phosphoribosyltransferase	TP3_03390, ,psos,ATP phosphoribosyltransferase	TP4_01260, ,psos,ATP phosphoribosyltransferase	TP4479_09735, ,psos,ATP phosphoribosyltransferase	TP8_05755, ,psos,ATP phosphoribosyltransferase	TP_2849_00790, ,psos,ATP phosphoribosyltransferase	UFV1_02870, ,psos,ATP phosphoribosyltransferase,IDENTICAL PARALOGS:,UFV1_03850,ATP phosphoribosyltransferase	jx18_03040, ,psos,ATP phosphoribosyltransferase
113	TP6375_00585, ,psos,Phosphoribosyl-ATP pyrophosphatase	2012CQ_ZSH_08265, ,psos,Phosphoribosyl-ATP pyrophosphatase	Arash114_00580, ,psos,Phosphoribosyl-ATP pyrophosphatase	Bu5_05235, ,psos,Phosphoribosyl-ATP pyrophosphatase	DSM_20630_02865, ,psos,Phosphoribosyl-ATP pyrophosphatase	MS249_06090, ,psos,Phosphoribosyl-ATP pyrophosphatase	NCTC5224_05260, ,psos,Phosphoribosyl-ATP pyrophosphatase	SH01_09515, ,psos,Phosphoribosyl-ATP pyrophosphatase	SH02_06040, ,psos,Phosphoribosyl-ATP pyrophosphatase	SH03_00570, ,psos,Phosphoribosyl-ATP pyrophosphatase	TP1_03295, ,psos,Phosphoribosyl-ATP pyrophosphatase	TP2_09285, ,psos,Phosphoribosyl-ATP pyrophosphatase	TP3_03395, ,psos,Phosphoribosyl-ATP pyrophosphatase	TP4_01255, ,psos,Phosphoribosyl-ATP pyrophosphatase	TP4479_09740, ,psos,Phosphoribosyl-ATP pyrophosphatase	TP8_05760, ,psos,Phosphoribosyl-ATP pyrophosphatase	TP_2849_00795, ,psos,Phosphoribosyl-ATP pyrophosphatase	UFV1_02875, ,psos,Phosphoribosyl-ATP pyrophosphatase,IDENTICAL PARALOGS:,UFV1_03855,Phosphoribosyl-ATP pyrophosphatase	jx18_03035, ,psos,Phosphoribosyl-ATP pyrophosphatase
114	TP6375_00590, ,psos,Thiamine biosynthesis protein	2012CQ_ZSH_08270, ,psos,Thiamine biosynthesis protein	Arash114_00585, ,psos,Thiamine biosynthesis protein	Bu5_05230, ,psos,Thiamine biosynthesis protein	DSM_20630_02870, ,psos,Thiamine biosynthesis protein	MS249_06095, ,psos,Thiamine biosynthesis protein	NCTC5224_05265, ,psos,Thiamine biosynthesis protein	SH01_09520, ,psos,Thiamine biosynthesis protein	SH02_06045, ,psos,Thiamine biosynthesis protein	SH03_00575, ,psos,Thiamine biosynthesis protein	TP1_03290, ,psos,Thiamine biosynthesis protein	TP2_09280, ,psos,Thiamine biosynthesis protein	TP3_03400, ,psos,Thiamine biosynthesis protein	TP4_01250, ,psos,Thiamine biosynthesis protein	TP4479_09745, ,psos,Thiamine biosynthesis protein	TP8_05765, ,psos,Thiamine biosynthesis protein	TP_2849_00800, ,psos,Thiamine biosynthesis protein	UFV1_02880, ,psos,Thiamine biosynthesis protein,IDENTICAL PARALOGS:,UFV1_03860,Thiamine biosynthesis protein	jx18_03030, ,psos,Thiamine biosynthesis protein
115	TP6375_00595, ,psos,Glycine betaine/L-proline transport system permease protein proW	2012CQ_ZSH_08275, ,psos,Glycine betaine/L-proline transport system permease protein proW	Arash114_00590, ,psos,Glycine betaine/L-proline transport system permease protein proW	Bu5_05225, ,psos,Glycine betaine/L-proline transport system permease protein proW	DSM_20630_02875, ,psos,Glycine betaine/L-proline transport system permease protein proW	MS249_06100, ,psos,Glycine betaine/L-proline transport system permease protein proW	NCTC5224_05270, ,psos,Glycine betaine/L-proline transport system permease protein proW	SH01_09525, ,psos,Glycine betaine/L-proline transport system permease protein proW	SH02_06050, ,psos,Glycine betaine/L-proline transport system permease protein proW	SH03_00580, ,psos,Glycine betaine/L-proline transport system permease protein proW	TP1_03285, ,psos,Glycine betaine/L-proline transport system permease protein proW	TP2_09275, ,psos,Glycine betaine/L-proline transport system permease protein proW	TP3_03405, ,psos,Glycine betaine/L-proline transport system permease protein proW	TP4_01245, ,psos,Glycine betaine/L-proline transport system permease protein proW	TP4479_09750, ,psos,Glycine betaine/L-proline transport system permease protein proW	TP8_05770, ,psos,Glycine betaine/L-proline transport system permease protein proW	TP_2849_00805, ,psos,Glycine betaine/L-proline transport system permease protein proW	UFV1_02885, ,psos,Glycine betaine/L-proline transport system permease protein proW,IDENTICAL PARALOGS:,UFV1_03865,Glycine betaine/L-proline transport system permease protein proW	jx18_03025, ,psos,Glycine betaine/L-proline transport system permease protein proW
116	TP6375_00600, ,psos,Ribulose-phosphate 3-epimerase	2012CQ_ZSH_08280, ,psos,Ribulose-phosphate 3-epimerase	Arash114_00595, ,psos,Ribulose-phosphate 3-epimerase	Bu5_05220, ,psos,Ribulose-phosphate 3-epimerase	DSM_20630_02880, ,psos,Ribulose-phosphate 3-epimerase	MS249_06105, ,psos,Ribulose-phosphate 3-epimerase	NCTC5224_05275, ,psos,Ribulose-phosphate 3-epimerase	SH01_09530, ,psos,Ribulose-phosphate 3-epimerase	SH02_06055, ,psos,Ribulose-phosphate 3-epimerase	SH03_00585, ,psos,Ribulose-phosphate 3-epimerase	TP1_03280, ,psos,Ribulose-phosphate 3-epimerase	TP2_09270, ,psos,Ribulose-phosphate 3-epimerase	TP3_03410, ,psos,Ribulose-phosphate 3-epimerase	TP4_01240, ,psos,Ribulose-phosphate 3-epimerase	TP4479_09755, ,psos,Ribulose-phosphate 3-epimerase	TP8_05775, ,psos,Ribulose-phosphate 3-epimerase	TP_2849_00810, ,psos,Ribulose-phosphate 3-epimerase	UFV1_02890, ,psos,Ribulose-phosphate 3-epimerase,IDENTICAL PARALOGS:,UFV1_03870,Ribulose-phosphate 3-epimerase	jx18_03020, ,psos,Ribulose-phosphate 3-epimerase
117	TP6375_00605, ,psos,Ribosomal RNA small subunit methyltransferase B	2012CQ_ZSH_08285, ,psos,Ribosomal RNA small subunit methyltransferase B	Arash114_00600, ,psos,Ribosomal RNA small subunit methyltransferase B	Bu5_05215, ,psos,Ribosomal RNA small subunit methyltransferase B	DSM_20630_02885, ,psos,Ribosomal RNA small subunit methyltransferase B	MS249_06110, ,psos,Ribosomal RNA small subunit methyltransferase B	NCTC5224_05280, ,psos,Ribosomal RNA small subunit methyltransferase B	SH01_09535, ,psos,Ribosomal RNA small subunit methyltransferase B	SH02_06060, ,psos,Ribosomal RNA small subunit methyltransferase B	SH03_00590, ,psos,Ribosomal RNA small subunit methyltransferase B	TP1_03275, ,psos,Ribosomal RNA small subunit methyltransferase B	TP2_09265, ,psos,Ribosomal RNA small subunit methyltransferase B	TP3_03415, ,psos,Ribosomal RNA small subunit methyltransferase B	TP4_01235, ,psos,Ribosomal RNA small subunit methyltransferase B	TP4479_09760, ,psos,Ribosomal RNA small subunit methyltransferase B	TP8_05780, ,psos,Ribosomal RNA small subunit methyltransferase B	TP_2849_00815, ,psos,Ribosomal RNA small subunit methyltransferase B	UFV1_02895, ,psos,Ribosomal RNA small subunit methyltransferase B,IDENTICAL PARALOGS:,UFV1_03875,Ribosomal RNA small subunit methyltransferase B	jx18_03015, ,psos,Ribosomal RNA small subunit methyltransferase B
118	TP6375_00610, ,psos,Methionyl-tRNA formyltransferase	2012CQ_ZSH_08290, ,psos,Methionyl-tRNA formyltransferase	Arash114_00605, ,psos,Methionyl-tRNA formyltransferase	Bu5_05210, ,psos,Methionyl-tRNA formyltransferase	DSM_20630_02890, ,psos,Methionyl-tRNA formyltransferase	MS249_06115, ,psos,Methionyl-tRNA formyltransferase	NCTC5224_05285, ,psos,Methionyl-tRNA formyltransferase	SH01_09540, ,psos,Methionyl-tRNA formyltransferase	SH02_06065, ,psos,Methionyl-tRNA formyltransferase	SH03_00595, ,psos,Methionyl-tRNA formyltransferase	TP1_03270, ,psos,Methionyl-tRNA formyltransferase	TP2_09260, ,psos,Methionyl-tRNA formyltransferase	TP3_03420, ,psos,Methionyl-tRNA formyltransferase	TP4_01230, ,psos,Methionyl-tRNA formyltransferase	TP4479_09765, ,psos,Methionyl-tRNA formyltransferase	TP8_05785, ,psos,Methionyl-tRNA formyltransferase	TP_2849_00820, ,psos,Methionyl-tRNA formyltransferase	UFV1_02900, ,psos,Methionyl-tRNA formyltransferase,IDENTICAL PARALOGS:,UFV1_03880,Methionyl-tRNA formyltransferase	jx18_03010, ,psos,Methionyl-tRNA formyltransferase
119	TP6375_00615, ,psos,PriA_3primeBD domain-containing protein	2012CQ_ZSH_08295, ,psos,PriA_3primeBD domain-containing protein	Arash114_00610, ,psos,PriA_3primeBD domain-containing protein	Bu5_05205, ,psos,PriA_3primeBD domain-containing protein	DSM_20630_02895, ,psos,PriA_3primeBD domain-containing protein	MS249_06120, ,psos,PriA_3primeBD domain-containing protein	NCTC5224_05290, ,psos,PriA_3primeBD domain-containing protein	SH01_09545, ,psos,PriA_3primeBD domain-containing protein	SH02_06070, ,psos,PriA_3primeBD domain-containing protein	SH03_00600, ,psos,PriA_3primeBD domain-containing protein	TP1_03265, ,psos,PriA_3primeBD domain-containing protein	TP2_09255, ,psos,PriA_3primeBD domain-containing protein	TP3_03425, ,psos,PriA_3primeBD domain-containing protein	TP4_01225, ,psos,PriA_3primeBD domain-containing protein	TP4479_09770, ,psos,PriA_3primeBD domain-containing protein	TP8_05790, ,psos,PriA_3primeBD domain-containing protein	TP_2849_00825, ,psos,PriA_3primeBD domain-containing protein	UFV1_02905, ,psos,PriA_3primeBD domain-containing protein,IDENTICAL PARALOGS:,UFV1_03885,PriA_3primeBD domain-containing protein	jx18_03005, ,psos,PriA_3primeBD domain-containing protein
120	TP6375_00620, ,psos,S-adenosylmethionine synthase	2012CQ_ZSH_08300, ,psos,S-adenosylmethionine synthase	Arash114_00615, ,psos,S-adenosylmethionine synthase	Bu5_05200, ,psos,S-adenosylmethionine synthase	DSM_20630_02900, ,psos,S-adenosylmethionine synthase	MS249_06125, ,psos,S-adenosylmethionine synthase	NCTC5224_05295, ,psos,S-adenosylmethionine synthase	SH01_09550, ,psos,S-adenosylmethionine synthase	SH02_06075, ,psos,S-adenosylmethionine synthase	SH03_00605, ,psos,S-adenosylmethionine synthase	TP1_03260, ,psos,S-adenosylmethionine synthase	TP2_09250, ,psos,S-adenosylmethionine synthase	TP3_03430, ,psos,S-adenosylmethionine synthase	TP4_01220, ,psos,S-adenosylmethionine synthase	TP4479_09775, ,psos,S-adenosylmethionine synthase	TP8_05795, ,psos,S-adenosylmethionine synthase	TP_2849_00830, ,psos,S-adenosylmethionine synthase	UFV1_02910, ,psos,S-adenosylmethionine synthase,IDENTICAL PARALOGS:,UFV1_03890,S-adenosylmethionine synthase	jx18_03000, ,psos,S-adenosylmethionine synthase
121	TP6375_00625, ,psos,Coenzyme A biosynthesis bifunctional protein CoaBC	2012CQ_ZSH_08305, ,psos,Coenzyme A biosynthesis bifunctional protein CoaBC	Arash114_00620, ,psos,Coenzyme A biosynthesis bifunctional protein CoaBC	Bu5_05195, ,psos,Coenzyme A biosynthesis bifunctional protein CoaBC	DSM_20630_02905, ,psos,Coenzyme A biosynthesis bifunctional protein CoaBC	MS249_06130, ,psos,Coenzyme A biosynthesis bifunctional protein CoaBC	NCTC5224_05300, ,psos,Coenzyme A biosynthesis bifunctional protein CoaBC	SH01_09555, ,psos,Coenzyme A biosynthesis bifunctional protein CoaBC	SH02_06080, ,psos,Coenzyme A biosynthesis bifunctional protein CoaBC	SH03_00610, ,psos,Coenzyme A biosynthesis bifunctional protein CoaBC	TP1_03255, ,psos,Coenzyme A biosynthesis bifunctional protein CoaBC	TP2_09245, ,psos,Coenzyme A biosynthesis bifunctional protein CoaBC	TP3_03435, ,psos,Coenzyme A biosynthesis bifunctional protein CoaBC	TP4_01215, ,psos,Coenzyme A biosynthesis bifunctional protein CoaBC	TP4479_09780, ,psos,Coenzyme A biosynthesis bifunctional protein CoaBC	TP8_05800, ,psos,Coenzyme A biosynthesis bifunctional protein CoaBC	TP_2849_00835, ,psos,Coenzyme A biosynthesis bifunctional protein CoaBC	UFV1_02915, ,psos,Coenzyme A biosynthesis bifunctional protein CoaBC,IDENTICAL PARALOGS:,UFV1_03895,Coenzyme A biosynthesis bifunctional protein CoaBC	jx18_02995, ,psos,Coenzyme A biosynthesis bifunctional protein CoaBC
122	TP6375_00630, ,psos,DNA-directed RNA polymerase subunit omega	2012CQ_ZSH_08310, ,psos,DNA-directed RNA polymerase subunit omega	Arash114_00625, ,psos,DNA-directed RNA polymerase subunit omega	Bu5_05190, ,psos,DNA-directed RNA polymerase subunit omega	DSM_20630_02910, ,psos,DNA-directed RNA polymerase subunit omega	MS249_06135, ,psos,DNA-directed RNA polymerase subunit omega	NCTC5224_05305, ,psos,DNA-directed RNA polymerase subunit omega	SH01_09560, ,psos,DNA-directed RNA polymerase subunit omega	SH02_06085, ,psos,DNA-directed RNA polymerase subunit omega	SH03_00615, ,psos,DNA-directed RNA polymerase subunit omega	TP1_03250, ,psos,DNA-directed RNA polymerase subunit omega	TP2_09240, ,psos,DNA-directed RNA polymerase subunit omega	TP3_03440, ,psos,DNA-directed RNA polymerase subunit omega	TP4_01210, ,psos,DNA-directed RNA polymerase subunit omega	TP4479_09785, ,psos,DNA-directed RNA polymerase subunit omega	TP8_05805, ,psos,DNA-directed RNA polymerase subunit omega	TP_2849_00840, ,psos,DNA-directed RNA polymerase subunit omega	UFV1_02920, ,psos,DNA-directed RNA polymerase subunit omega,IDENTICAL PARALOGS:,UFV1_03900,DNA-directed RNA polymerase subunit omega	jx18_02990, ,psos,DNA-directed RNA polymerase subunit omega
123	TP6375_00635, ,psos,Guanylate kinase	2012CQ_ZSH_08315, ,psos,Guanylate kinase	Arash114_00630, ,psos,Guanylate kinase	Bu5_05185, ,psos,Guanylate kinase	DSM_20630_02915, ,psos,Guanylate kinase	MS249_06140, ,psos,Guanylate kinase	NCTC5224_05310, ,psos,Guanylate kinase	SH01_09565, ,psos,Guanylate kinase	SH02_06090, ,psos,Guanylate kinase	SH03_00620, ,psos,Guanylate kinase	TP1_03245, ,psos,Guanylate kinase	TP2_09235, ,psos,Guanylate kinase	TP3_03445, ,psos,Guanylate kinase	TP4_01205, ,psos,Guanylate kinase	TP4479_09790, ,psos,Guanylate kinase	TP8_05810, ,psos,Guanylate kinase	TP_2849_00845, ,psos,Guanylate kinase	UFV1_02925, ,psos,Guanylate kinase,IDENTICAL PARALOGS:,UFV1_03905,Guanylate kinase	jx18_02985, ,psos,Guanylate kinase
124	TP6375_00640, ,psos,Integration host factor	2012CQ_ZSH_08320, ,psos,Integration host factor	Arash114_00635, ,psos,Integration host factor	Bu5_05180, ,psos,Integration host factor	DSM_20630_02920, ,psos,Integration host factor	MS249_06145, ,psos,Integration host factor	NCTC5224_05315, ,psos,Integration host factor	SH01_09570, ,psos,Integration host factor	SH02_06095, ,psos,Integration host factor	SH03_00625, ,psos,Integration host factor	TP1_03240, ,psos,Integration host factor	TP2_09230, ,psos,Integration host factor	TP3_03450, ,psos,Integration host factor	TP4_01200, ,psos,Integration host factor	TP4479_09795, ,psos,Integration host factor	TP8_05815, ,psos,Integration host factor	TP_2849_00850, ,psos,Integration host factor	UFV1_02930, ,psos,Integration host factor,IDENTICAL PARALOGS:,UFV1_03910,Integration host factor	jx18_02980, ,psos,Integration host factor
125	TP6375_00645, ,psos,Carbamoyl-phosphate synthase large chain	2012CQ_ZSH_08325, ,psos,hypothetical protein	Arash114_00640, ,psos,Carbamoyl-phosphate synthase large chain	Bu5_05175, ,psos,Carbamoyl-phosphate synthase large chain	DSM_20630_02925, ,psos,Carbamoyl-phosphate synthase (glutamine-hydrolyzing)	MS249_06150, ,psos,Carbamoyl-phosphate synthase large chain	NCTC5224_05320, ,psos,Carbamoyl-phosphate synthase (glutamine-hydrolyzing)	SH01_09575, ,psos,hypothetical protein	SH02_06100, ,psos,Carbamoyl-phosphate synthase (glutamine-hydrolyzing)	SH03_00630, ,psos,Carbamoyl-phosphate synthase (glutamine-hydrolyzing)	TP1_03235, ,psos,Carbamoyl-phosphate synthase large chain	TP2_09225, ,psos,Carbamoyl-phosphate synthase large chain	TP3_03455, ,psos,Carbamoyl-phosphate synthase (glutamine-hydrolyzing)	TP4_01195, ,psos,Carbamoyl-phosphate synthase (glutamine-hydrolyzing)	TP4479_09800, ,psos,Carbamoyl-phosphate synthase (glutamine-hydrolyzing)	TP8_05820, ,psos,hypothetical protein	TP_2849_00855, ,psos,Carbamoyl-phosphate synthase (glutamine-hydrolyzing)	UFV1_02935, ,psos,Carbamoyl-phosphate synthase large chain,IDENTICAL PARALOGS:,UFV1_03915,Carbamoyl-phosphate synthase large chain	jx18_02975, ,psos,hypothetical protein
126	TP6375_00650, ,psos,CPSase_sm_chain domain-containing protein	2012CQ_ZSH_08340, ,psos,Carbamoyl-phosphate synthase small chain	Arash114_00645, ,psos,CPSase_sm_chain domain-containing protein	Bu5_05170, ,psos,CPSase_sm_chain domain-containing protein	DSM_20630_02935, ,psos,Carbamoyl-phosphate synthase small chain	MS249_06155, ,psos,CPSase_sm_chain domain-containing protein	NCTC5224_05330, ,psos,Carbamoyl-phosphate synthase small chain	SH01_09590, ,psos,Carbamoyl-phosphate synthase small chain	SH02_06105, ,psos,Carbamoyl-phosphate synthase small chain	SH03_00635, ,psos,Carbamoyl-phosphate synthase small chain	TP1_03230, ,psos,CPSase_sm_chain domain-containing protein	TP2_09220, ,psos,CPSase_sm_chain domain-containing protein	TP3_03460, ,psos,Carbamoyl-phosphate synthase small chain	TP4_01190, ,psos,Carbamoyl-phosphate synthase small chain	TP4479_09805, ,psos,Carbamoyl-phosphate synthase small chain	TP8_05835, ,psos,Carbamoyl-phosphate synthase small chain	TP_2849_00860, ,psos,Carbamoyl-phosphate synthase small chain	UFV1_02045, ,psos,CPSase_sm_chain domain-containing protein,IDENTICAL PARALOGS:,UFV1_02940,CPSase_sm_chain domain-containing protein,IDENTICAL PARALOGS:,UFV1_03920,CPSase_sm_chain domain-containing protein	jx18_02960, ,psos,CPSase_sm_chain domain-containing protein
127	TP6375_00655, ,psos,N utilization substance protein B homolog	2012CQ_ZSH_08345, ,psos,N utilization substance protein B homolog	Arash114_00650, ,psos,N utilization substance protein B homolog	Bu5_05165, ,psos,N utilization substance protein B homolog	DSM_20630_02940, ,psos,N utilization substance protein B homolog	MS249_06160, ,psos,N utilization substance protein B homolog	NCTC5224_05335, ,psos,N utilization substance protein B homolog	SH01_09595, ,psos,N utilization substance protein B homolog	SH02_06110, ,psos,N utilization substance protein B homolog	SH03_00640, ,psos,N utilization substance protein B homolog	TP1_03225, ,psos,N utilization substance protein B homolog	TP2_09215, ,psos,N utilization substance protein B homolog	TP3_03465, ,psos,N utilization substance protein B homolog	TP4_01185, ,psos,N utilization substance protein B homolog	TP4479_09810, ,psos,N utilization substance protein B homolog	TP8_05840, ,psos,N utilization substance protein B homolog	TP_2849_00865, ,psos,N utilization substance protein B homolog	UFV1_02050, ,psos,N utilization substance protein B homolog,IDENTICAL PARALOGS:,UFV1_02945,N utilization substance protein B homolog,IDENTICAL PARALOGS:,UFV1_03925,N utilization substance protein B homolog	jx18_02955, ,psos,N utilization substance protein B homolog
128	TP6375_00660, ,psos,Elongation factor P	2012CQ_ZSH_08350, ,psos,Elongation factor P	Arash114_00655, ,psos,Elongation factor P	Bu5_05160, ,psos,Elongation factor P	DSM_20630_02945, ,psos,Elongation factor P	MS249_06165, ,psos,Elongation factor P	NCTC5224_05340, ,psos,Elongation factor P	SH01_09600, ,psos,Elongation factor P	SH02_06115, ,psos,Elongation factor P	SH03_00645, ,psos,Elongation factor P	TP1_03220, ,psos,Elongation factor P	TP2_09210, ,psos,Elongation factor P	TP3_03470, ,psos,Elongation factor P	TP4_01180, ,psos,Elongation factor P	TP4479_09815, ,psos,Elongation factor P	TP8_05845, ,psos,Elongation factor P	TP_2849_00870, ,psos,Elongation factor P	UFV1_02055, ,psos,Elongation factor P,IDENTICAL PARALOGS:,UFV1_02950,Elongation factor P,IDENTICAL PARALOGS:,UFV1_03930,Elongation factor P	jx18_02950, ,psos,Elongation factor P
129	TP6375_00665, ,psos,Cadmium, zinc and cobalt-transporting ATPase	2012CQ_ZSH_08355, ,psos,Cadmium, zinc and cobalt-transporting ATPase	Arash114_00660, ,psos,Cadmium, zinc and cobalt-transporting ATPase	Bu5_05155, ,psos,Cadmium, zinc and cobalt-transporting ATPase	DSM_20630_02950, ,psos,Cadmium, zinc and cobalt-transporting ATPase	MS249_06170, ,psos,Cadmium, zinc and cobalt-transporting ATPase	NCTC5224_05345, ,psos,Cadmium, zinc and cobalt-transporting ATPase	SH01_09605, ,psos,Cadmium, zinc and cobalt-transporting ATPase	SH02_06120, ,psos,Cadmium, zinc and cobalt-transporting ATPase	SH03_00650, ,psos,Cadmium, zinc and cobalt-transporting ATPase	TP1_03215, ,psos,Cadmium, zinc and cobalt-transporting ATPase	TP2_09205, ,psos,Cadmium, zinc and cobalt-transporting ATPase	TP3_03475, ,psos,Cadmium, zinc and cobalt-transporting ATPase	TP4_01175, ,psos,Cadmium, zinc and cobalt-transporting ATPase	TP4479_09820, ,psos,Cadmium, zinc and cobalt-transporting ATPase	TP8_05850, ,psos,Cadmium, zinc and cobalt-transporting ATPase	TP_2849_00875, ,psos,Cadmium, zinc and cobalt-transporting ATPase	UFV1_02060, ,psos,Cadmium, zinc and cobalt-transporting ATPase,IDENTICAL PARALOGS:,UFV1_02955,Cadmium, zinc and cobalt-transporting ATPase,IDENTICAL PARALOGS:,UFV1_03935,Cadmium, zinc and cobalt-transporting ATPase	jx18_02945, ,psos,Cadmium, zinc and cobalt-transporting ATPase
130	TP6375_00670, ,psos,Shikimate kinase	2012CQ_ZSH_08360, ,psos,Shikimate kinase	Arash114_00665, ,psos,Shikimate kinase	Bu5_05150, ,psos,Shikimate kinase	DSM_20630_02955, ,psos,Shikimate kinase	MS249_06175, ,psos,Shikimate kinase	NCTC5224_05350, ,psos,Shikimate kinase	SH01_09610, ,psos,Shikimate kinase	SH02_06125, ,psos,Shikimate kinase	SH03_00655, ,psos,Shikimate kinase	TP1_03210, ,psos,Shikimate kinase	TP2_09200, ,psos,Shikimate kinase	TP3_03480, ,psos,Shikimate kinase	TP4_01170, ,psos,Shikimate kinase	TP4479_09825, ,psos,Shikimate kinase	TP8_05855, ,psos,Shikimate kinase	TP_2849_00880, ,psos,Shikimate kinase	UFV1_02065, ,psos,Shikimate kinase,IDENTICAL PARALOGS:,UFV1_02960,Shikimate kinase,IDENTICAL PARALOGS:,UFV1_03940,Shikimate kinase	jx18_02940, ,psos,Shikimate kinase
131	TP6375_00675, ,psos,Multifunctional fusion protein	2012CQ_ZSH_08365, ,psos,Multifunctional fusion protein	Arash114_00670, ,psos,Multifunctional fusion protein	Bu5_05145, ,psos,Multifunctional fusion protein	DSM_20630_02960, ,psos,Multifunctional fusion protein	MS249_06180, ,psos,Multifunctional fusion protein	NCTC5224_05355, ,psos,Multifunctional fusion protein	SH01_09615, ,psos,Multifunctional fusion protein	SH02_06130, ,psos,Multifunctional fusion protein	SH03_00660, ,psos,Multifunctional fusion protein	TP1_03205, ,psos,Multifunctional fusion protein	TP2_09195, ,psos,Multifunctional fusion protein	TP3_03485, ,psos,Multifunctional fusion protein	TP4_01165, ,psos,Multifunctional fusion protein	TP4479_09830, ,psos,Multifunctional fusion protein	TP8_05860, ,psos,Multifunctional fusion protein	TP_2849_00885, ,psos,Multifunctional fusion protein	UFV1_02070, ,psos,Multifunctional fusion protein,IDENTICAL PARALOGS:,UFV1_02965,Multifunctional fusion protein,IDENTICAL PARALOGS:,UFV1_03945,Multifunctional fusion protein	jx18_02935, ,psos,Multifunctional fusion protein
132	TP6375_00680, ,psos,Chorismate synthase	2012CQ_ZSH_08370, ,psos,Chorismate synthase	Arash114_00675, ,psos,Chorismate synthase	Bu5_05140, ,psos,Chorismate synthase	DSM_20630_02965, ,psos,Chorismate synthase	MS249_06185, ,psos,Chorismate synthase	NCTC5224_05360, ,psos,Chorismate synthase	SH01_09620, ,psos,Chorismate synthase	SH02_06135, ,psos,Chorismate synthase	SH03_00665, ,psos,Chorismate synthase	TP1_03200, ,psos,Chorismate synthase	TP2_09190, ,psos,Chorismate synthase	TP3_03490, ,psos,Chorismate synthase	TP4_01160, ,psos,Chorismate synthase	TP4479_09835, ,psos,Chorismate synthase	TP8_05865, ,psos,Chorismate synthase	TP_2849_00890, ,psos,Chorismate synthase	UFV1_02075, ,psos,Chorismate synthase,IDENTICAL PARALOGS:,UFV1_02970,Chorismate synthase,IDENTICAL PARALOGS:,UFV1_03950,Chorismate synthase	jx18_02930, ,psos,Chorismate synthase
133	TP6375_00685, ,psos,prepilin peptidase	2012CQ_ZSH_08375, ,psos,prepilin peptidase	Arash114_00680, ,psos,hypothetical protein	Bu5_05135, ,psos,prepilin peptidase	DSM_20630_02970, ,psos,Type IV leader peptidase family	MS249_06190, ,psos,prepilin peptidase	NCTC5224_05365, ,psos,Type IV leader peptidase family	SH01_09625, ,psos,prepilin peptidase	SH02_06140, ,psos,prepilin peptidase	SH03_00670, ,psos,prepilin peptidase	TP1_03195, ,psos,prepilin peptidase	TP2_09185, ,psos,prepilin peptidase	TP3_03495, ,psos,Type IV leader peptidase family	TP4_01155, ,psos,Type IV leader peptidase family	TP4479_09840, ,psos,Type IV leader peptidase family	TP8_05870, ,psos,prepilin peptidase	TP_2849_00895, ,psos,Type IV leader peptidase family	UFV1_02080, ,psos,prepilin peptidase,IDENTICAL PARALOGS:,UFV1_02975,prepilin peptidase,IDENTICAL PARALOGS:,UFV1_03955,prepilin peptidase	jx18_02925, ,psos,prepilin peptidase
134	TP6375_00690, ,psos,Shikimate 5-dehydrogenase	2012CQ_ZSH_08380, ,psos,Shikimate 5-dehydrogenase	Arash114_00685, ,psos,Shikimate 5-dehydrogenase	Bu5_05130, ,psos,Shikimate 5-dehydrogenase	DSM_20630_02975, ,psos,Shikimate 5-dehydrogenase	MS249_06195, ,psos,Shikimate 5-dehydrogenase	NCTC5224_05370, ,psos,Shikimate 5-dehydrogenase	SH01_09630, ,psos,Shikimate 5-dehydrogenase	SH02_06145, ,psos,Shikimate 5-dehydrogenase	SH03_00675, ,psos,Shikimate 5-dehydrogenase	TP1_03190, ,psos,Shikimate 5-dehydrogenase	TP2_09180, ,psos,Shikimate 5-dehydrogenase	TP3_03500, ,psos,Shikimate 5-dehydrogenase	TP4_01150, ,psos,Shikimate 5-dehydrogenase	TP4479_09845, ,psos,Shikimate 5-dehydrogenase	TP8_05875, ,psos,Shikimate 5-dehydrogenase	TP_2849_00900, ,psos,Shikimate 5-dehydrogenase	UFV1_02085, ,psos,Shikimate 5-dehydrogenase,IDENTICAL PARALOGS:,UFV1_02980,Shikimate 5-dehydrogenase,IDENTICAL PARALOGS:,UFV1_03960,Shikimate 5-dehydrogenase	jx18_02920, ,psos,Shikimate 5-dehydrogenase
135	TP6375_00695, ,psos,Endolytic murein transglycosylase	2012CQ_ZSH_08385, ,psos,Endolytic murein transglycosylase	Arash114_00690, ,psos,Endolytic murein transglycosylase	Bu5_05125, ,psos,Endolytic murein transglycosylase	DSM_20630_02980, ,psos,Endolytic murein transglycosylase	MS249_06200, ,psos,Endolytic murein transglycosylase	NCTC5224_05375, ,psos,Endolytic murein transglycosylase	SH01_09635, ,psos,Endolytic murein transglycosylase	SH02_06150, ,psos,Endolytic murein transglycosylase	SH03_00680, ,psos,Endolytic murein transglycosylase	TP1_03185, ,psos,Endolytic murein transglycosylase	TP2_09175, ,psos,Endolytic murein transglycosylase	TP3_03505, ,psos,Endolytic murein transglycosylase	TP4_01145, ,psos,Endolytic murein transglycosylase	TP4479_09850, ,psos,Endolytic murein transglycosylase	TP8_05880, ,psos,Endolytic murein transglycosylase	TP_2849_00905, ,psos,Endolytic murein transglycosylase	UFV1_02090, ,psos,Endolytic murein transglycosylase,IDENTICAL PARALOGS:,UFV1_02985,Endolytic murein transglycosylase,IDENTICAL PARALOGS:,UFV1_03965,Endolytic murein transglycosylase	jx18_02915, ,psos,Endolytic murein transglycosylase
136	TP6375_00700, ,psos,Putative pre-16S rRNA nuclease	2012CQ_ZSH_08390, ,psos,Putative pre-16S rRNA nuclease	Arash114_00695, ,psos,Putative pre-16S rRNA nuclease	Bu5_05120, ,psos,Putative pre-16S rRNA nuclease	DSM_20630_02985, ,psos,Putative pre-16S rRNA nuclease	MS249_06205, ,psos,Putative pre-16S rRNA nuclease	NCTC5224_05380, ,psos,Putative pre-16S rRNA nuclease	SH01_09640, ,psos,Putative pre-16S rRNA nuclease	SH02_06155, ,psos,Putative pre-16S rRNA nuclease	SH03_00685, ,psos,Putative pre-16S rRNA nuclease	- , -	TP2_09170, ,psos,Putative pre-16S rRNA nuclease	TP3_03510, ,psos,Putative pre-16S rRNA nuclease	TP4_01140, ,psos,Putative pre-16S rRNA nuclease	TP4479_09855, ,psos,Putative pre-16S rRNA nuclease	TP8_05885, ,psos,Putative pre-16S rRNA nuclease	TP_2849_00910, ,psos,Putative pre-16S rRNA nuclease	UFV1_02095, ,psos,Putative pre-16S rRNA nuclease,IDENTICAL PARALOGS:,UFV1_02990,Putative pre-16S rRNA nuclease,IDENTICAL PARALOGS:,UFV1_03970,Putative pre-16S rRNA nuclease	jx18_02910, ,psos,Putative pre-16S rRNA nuclease
137	TP6375_00705, ,psos,Alanine--tRNA ligase	2012CQ_ZSH_08395, ,psos,Alanine--tRNA ligase	Arash114_00700, ,psos,Alanine--tRNA ligase	Bu5_05115, ,psos,Alanine--tRNA ligase	DSM_20630_02990, ,psos,Alanine--tRNA ligase	MS249_06210, ,psos,Alanine--tRNA ligase	NCTC5224_05385, ,psos,Alanine--tRNA ligase	SH01_09645, ,psos,Alanine--tRNA ligase	SH02_06160, ,psos,Alanine--tRNA ligase	SH03_00690, ,psos,Alanine--tRNA ligase	TP1_03175, ,psos,Alanine--tRNA ligase	TP2_09165, ,psos,Alanine--tRNA ligase	TP3_03515, ,psos,Alanine--tRNA ligase	TP4_01135, ,psos,Alanine--tRNA ligase	TP4479_09860, ,psos,Alanine--tRNA ligase	TP8_05890, ,psos,Alanine--tRNA ligase (Fragment)	TP_2849_00915, ,psos,Alanine--tRNA ligase	UFV1_02100, ,psos,Alanine--tRNA ligase,IDENTICAL PARALOGS:,UFV1_02995,Alanine--tRNA ligase,IDENTICAL PARALOGS:,UFV1_03975,Alanine--tRNA ligase	jx18_02905, ,psos,Alanine--tRNA ligase
138	TP6375_00710, ,psos,DUF948 domain-containing protein	2012CQ_ZSH_08400, ,psos,DUF948 domain-containing protein	Arash114_00705, ,psos,DUF948 domain-containing protein	Bu5_05110, ,psos,DUF948 domain-containing protein	DSM_20630_02995, ,psos,DUF948 domain-containing protein	MS249_06215, ,psos,DUF948 domain-containing protein	NCTC5224_05390, ,psos,DUF948 domain-containing protein	SH01_09650, ,psos,DUF948 domain-containing protein	SH02_06165, ,psos,DUF948 domain-containing protein	SH03_00695, ,psos,DUF948 domain-containing protein	TP1_03170, ,psos,DUF948 domain-containing protein	TP2_09160, ,psos,DUF948 domain-containing protein	TP3_03520, ,psos,DUF948 domain-containing protein	TP4_01130, ,psos,DUF948 domain-containing protein	TP4479_09865, ,psos,DUF948 domain-containing protein	TP8_05910, ,psos,DUF948 domain-containing protein	TP_2849_00920, ,psos,DUF948 domain-containing protein	UFV1_02105, ,psos,DUF948 domain-containing protein,IDENTICAL PARALOGS:,UFV1_03000,DUF948 domain-containing protein,IDENTICAL PARALOGS:,UFV1_03980,DUF948 domain-containing protein	jx18_02900, ,psos,DUF948 domain-containing protein
139	TP6375_00715, ,psos,30S ribosomal protein S4	2012CQ_ZSH_08405, ,psos,30S ribosomal protein S4	Arash114_00710, ,psos,30S ribosomal protein S4	Bu5_05105, ,psos,30S ribosomal protein S4	DSM_20630_03000, ,psos,30S ribosomal protein S4	MS249_06220, ,psos,30S ribosomal protein S4	NCTC5224_05395, ,psos,30S ribosomal protein S4	SH01_09655, ,psos,30S ribosomal protein S4	SH02_06170, ,psos,30S ribosomal protein S4	SH03_00700, ,psos,30S ribosomal protein S4	TP1_03165, ,psos,30S ribosomal protein S4	TP2_09155, ,psos,30S ribosomal protein S4	TP3_03525, ,psos,30S ribosomal protein S4	TP4_01125, ,psos,30S ribosomal protein S4	TP4479_09870, ,psos,30S ribosomal protein S4	TP8_05905, ,psos,30S ribosomal protein S4	TP_2849_00925, ,psos,30S ribosomal protein S4	UFV1_02110, ,psos,30S ribosomal protein S4,IDENTICAL PARALOGS:,UFV1_03005,30S ribosomal protein S4,IDENTICAL PARALOGS:,UFV1_03985,30S ribosomal protein S4	jx18_02895, ,psos,30S ribosomal protein S4
140	TP6375_00720, ,psos,Replication-associated recombination protein A	2012CQ_ZSH_08410, ,psos,Replication-associated recombination protein A	Arash114_00715, ,psos,Replication-associated recombination protein A	Bu5_05100, ,psos,Replication-associated recombination protein A	DSM_20630_03005, ,psos,Replication-associated recombination protein A	MS249_06225, ,psos,Replication-associated recombination protein A	NCTC5224_05400, ,psos,Replication-associated recombination protein A	SH01_09660, ,psos,Replication-associated recombination protein A	SH02_06175, ,psos,Replication-associated recombination protein A	SH03_00705, ,psos,Replication-associated recombination protein A	TP1_03160, ,psos,Replication-associated recombination protein A	TP2_09150, ,psos,Replication-associated recombination protein A	TP3_03530, ,psos,Replication-associated recombination protein A	TP4_01120, ,psos,Replication-associated recombination protein A	TP4479_09875, ,psos,Replication-associated recombination protein A	TP8_05900, ,psos,Replication-associated recombination protein A	TP_2849_00930, ,psos,Replication-associated recombination protein A	UFV1_02115, ,psos,Replication-associated recombination protein A,IDENTICAL PARALOGS:,UFV1_03010,Replication-associated recombination protein A,IDENTICAL PARALOGS:,UFV1_03990,Replication-associated recombination protein A	jx18_02890, ,psos,Replication-associated recombination protein A
141	TP6375_00725, ,psos,Membrane transport protein mmpL8	2012CQ_ZSH_08415, ,psos,Membrane transport protein mmpL8	Arash114_00720, ,psos,Membrane transport protein mmpL8	Bu5_05095, ,psos,Membrane transport protein mmpL8	DSM_20630_03010, ,psos,Membrane transport protein mmpL8	MS249_06230, ,psos,Membrane transport protein mmpL8	NCTC5224_05405, ,psos,Membrane transport protein mmpL8	SH01_09665, ,psos,Membrane transport protein mmpL8	SH02_06180, ,psos,Membrane transport protein mmpL8	SH03_00710, ,psos,Membrane transport protein mmpL8	TP1_03155, ,psos,Membrane transport protein mmpL8	TP2_09145, ,psos,Membrane transport protein mmpL8	TP3_03535, ,psos,Membrane transport protein mmpL8	TP4_01115, ,psos,Membrane transport protein mmpL8	TP4479_09880, ,psos,Membrane transport protein mmpL8	TP8_05895, ,psos,MMPL family transporter	TP_2849_00935, ,psos,Membrane transport protein mmpL8	UFV1_02120, ,psos,Membrane transport protein mmpL8,IDENTICAL PARALOGS:,UFV1_03015,Membrane transport protein mmpL8,IDENTICAL PARALOGS:,UFV1_03995,Membrane transport protein mmpL8	jx18_02885, ,psos,Membrane transport protein mmpL8
142	TP6375_00730, ,psos,hypothetical protein	2012CQ_ZSH_08420, ,psos,hypothetical protein	Arash114_00725, ,psos,hypothetical protein	Bu5_05090, ,psos,hypothetical protein	DSM_20630_03015, ,psos,hypothetical protein	MS249_06235, ,psos,hypothetical protein	NCTC5224_05410, ,psos,hypothetical protein	SH01_09670, ,psos,hypothetical protein	SH02_06185, ,psos,hypothetical protein	SH03_00715, ,psos,hypothetical protein	TP1_03150, ,psos,hypothetical protein	TP2_09140, ,psos,hypothetical protein	TP3_03540, ,psos,hypothetical protein	TP4_01110, ,psos,hypothetical protein	TP4479_09885, ,psos,hypothetical protein	TP8_05925, ,psos,hypothetical protein	TP_2849_00940, ,psos,hypothetical protein	UFV1_02125, ,psos,hypothetical protein,IDENTICAL PARALOGS:,UFV1_03020,hypothetical protein,IDENTICAL PARALOGS:,UFV1_04000,hypothetical protein	jx18_02880, ,psos,hypothetical protein
143	TP6375_00735, ,psos,N-acetyltransferase domain-containing protein	2012CQ_ZSH_08425, ,psos,N-acetyltransferase domain-containing protein	Arash114_00730, ,psos,N-acetyltransferase domain-containing protein	Bu5_05085, ,psos,N-acetyltransferase domain-containing protein	DSM_20630_03020, ,psos,N-acetyltransferase domain-containing protein	MS249_06240, ,psos,N-acetyltransferase domain-containing protein	NCTC5224_05415, ,psos,N-acetyltransferase domain-containing protein	SH01_09675, ,psos,N-acetyltransferase domain-containing protein	SH02_06190, ,psos,N-acetyltransferase domain-containing protein	SH03_00720, ,psos,N-acetyltransferase domain-containing protein	TP1_03145, ,psos,N-acetyltransferase domain-containing protein	TP2_09135, ,psos,N-acetyltransferase domain-containing protein	TP3_03545, ,psos,N-acetyltransferase domain-containing protein	TP4_01105, ,psos,N-acetyltransferase domain-containing protein	TP4479_09890, ,psos,N-acetyltransferase domain-containing protein	TP8_05930, ,psos,N-acetyltransferase domain-containing protein	TP_2849_00945, ,psos,N-acetyltransferase domain-containing protein	UFV1_02130, ,psos,N-acetyltransferase domain-containing protein,IDENTICAL PARALOGS:,UFV1_03025,N-acetyltransferase domain-containing protein,IDENTICAL PARALOGS:,UFV1_04005,N-acetyltransferase domain-containing protein	jx18_02875, ,psos,N-acetyltransferase domain-containing protein
144	TP6375_00740, ,psos,Aspartate--tRNA(Asp/Asn) ligase	2012CQ_ZSH_08430, ,psos,Aspartate--tRNA(Asp/Asn) ligase	Arash114_00735, ,psos,Aspartate--tRNA(Asp/Asn) ligase	Bu5_05080, ,psos,Aspartate--tRNA(Asp/Asn) ligase	DSM_20630_03025, ,psos,Aspartate--tRNA(Asp/Asn) ligase	MS249_06245, ,psos,Aspartate--tRNA(Asp/Asn) ligase	NCTC5224_05420, ,psos,Aspartate--tRNA(Asp/Asn) ligase	SH01_09680, ,psos,Aspartate--tRNA(Asp/Asn) ligase	SH02_06195, ,psos,Aspartate--tRNA(Asp/Asn) ligase	SH03_00725, ,psos,Aspartate--tRNA(Asp/Asn) ligase	TP1_03140, ,psos,Aspartate--tRNA(Asp/Asn) ligase	TP2_09130, ,psos,Aspartate--tRNA(Asp/Asn) ligase	TP3_03550, ,psos,Aspartate--tRNA(Asp/Asn) ligase	TP4_01100, ,psos,Aspartate--tRNA(Asp/Asn) ligase	TP4479_09895, ,psos,Aspartate--tRNA(Asp/Asn) ligase	TP8_05935, ,psos,Aspartate--tRNA(Asp/Asn) ligase	TP_2849_00950, ,psos,Aspartate--tRNA(Asp/Asn) ligase	UFV1_02135, ,psos,Aspartate--tRNA(Asp/Asn) ligase,IDENTICAL PARALOGS:,UFV1_03030,Aspartate--tRNA(Asp/Asn) ligase,IDENTICAL PARALOGS:,UFV1_04010,Aspartate--tRNA(Asp/Asn) ligase	jx18_02870, ,psos,Aspartate--tRNA(Asp/Asn) ligase
145	TP6375_00745, ,psos,Multidrug-efflux transporter 3	2012CQ_ZSH_08435, ,psos,Multidrug-efflux transporter 3	Arash114_00740, ,psos,Multidrug-efflux transporter 3	Bu5_05075, ,psos,Multidrug-efflux transporter 3	DSM_20630_03030, ,psos,Multidrug-efflux transporter 3	MS249_06250, ,psos,Multidrug-efflux transporter 3	NCTC5224_05425, ,psos,Multidrug-efflux transporter 3	SH01_09685, ,psos,Multidrug-efflux transporter 3	SH02_06200, ,psos,Multidrug-efflux transporter 3	SH03_00730, ,psos,Multidrug-efflux transporter 3	TP1_03135, ,psos,Multidrug-efflux transporter 3	TP2_09125, ,psos,Multidrug-efflux transporter 3	TP3_03555, ,psos,Multidrug-efflux transporter 3	TP4_01095, ,psos,Multidrug-efflux transporter 3	TP4479_09900, ,psos,Multidrug-efflux transporter 3	TP8_05940, ,psos,Multidrug-efflux transporter 3	TP_2849_00955, ,psos,Multidrug-efflux transporter 3	UFV1_02140, ,psos,Multidrug-efflux transporter 3,IDENTICAL PARALOGS:,UFV1_03035,Multidrug-efflux transporter 3,IDENTICAL PARALOGS:,UFV1_04015,Multidrug-efflux transporter 3	jx18_02865, ,psos,Multidrug-efflux transporter 3
146	TP6375_00750, ,psos,Cold-shock DEAD box protein A	2012CQ_ZSH_08440, ,psos,Cold-shock DEAD box protein A	Arash114_00745, ,psos,Cold-shock DEAD box protein A	Bu5_05070, ,psos,Cold-shock DEAD box protein A	DSM_20630_03035, ,psos,Cold-shock DEAD box protein A	MS249_06255, ,psos,Cold-shock DEAD box protein A	NCTC5224_05430, ,psos,Cold-shock DEAD box protein A	SH01_09690, ,psos,Cold-shock DEAD box protein A	SH02_06205, ,psos,Cold-shock DEAD box protein A	SH03_00735, ,psos,Cold-shock DEAD box protein A	TP1_03130, ,psos,Cold-shock DEAD box protein A	TP2_09120, ,psos,Cold-shock DEAD box protein A	TP3_03560, ,psos,Cold-shock DEAD box protein A	TP4_01090, ,psos,Cold-shock DEAD box protein A	TP4479_09905, ,psos,Cold-shock DEAD box protein A	TP8_05945, ,psos,Cold-shock DEAD box protein A	TP_2849_00960, ,psos,Cold-shock DEAD box protein A	UFV1_02145, ,psos,Cold-shock DEAD box protein A,IDENTICAL PARALOGS:,UFV1_03040,Cold-shock DEAD box protein A,IDENTICAL PARALOGS:,UFV1_04020,Cold-shock DEAD box protein A	jx18_02860, ,psos,Cold-shock DEAD box protein A
147	TP6375_00755, ,psos,hypothetical protein	2012CQ_ZSH_08445, ,psos,hypothetical protein	Arash114_00750, ,psos,hypothetical protein	Bu5_05065, ,psos,hypothetical protein	DSM_20630_03040, ,psos,hypothetical protein	MS249_06260, ,psos,hypothetical protein	NCTC5224_05435, ,psos,hypothetical protein	SH01_09695, ,psos,hypothetical protein	SH02_06210, ,psos,hypothetical protein	SH03_00740, ,psos,hypothetical protein	TP1_03125, ,psos,hypothetical protein	TP2_09115, ,psos,hypothetical protein	TP3_03565, ,psos,hypothetical protein	TP4_01085, ,psos,hypothetical protein	TP4479_09910, ,psos,hypothetical protein	TP8_05950, ,psos,hypothetical protein	TP_2849_00965, ,psos,hypothetical protein	UFV1_02150, ,psos,hypothetical protein,IDENTICAL PARALOGS:,UFV1_03045,hypothetical protein	jx18_02855, ,psos,hypothetical protein
148	TP6375_00760, ,psos,GTPase Era	2012CQ_ZSH_08450, ,psos,GTPase Era	Arash114_00755, ,psos,GTPase Era	Bu5_05060, ,psos,GTPase Era	DSM_20630_03045, ,psos,GTPase Era	MS249_06265, ,psos,GTPase Era	NCTC5224_05440, ,psos,GTPase Era	SH01_09700, ,psos,GTPase Era	SH02_06215, ,psos,GTPase Era	SH03_00745, ,psos,GTPase Era	TP1_03120, ,psos,GTPase Era	TP2_09110, ,psos,GTPase Era	TP3_03570, ,psos,GTPase Era	TP4_01080, ,psos,GTPase Era	TP4479_09915, ,psos,GTPase Era	TP8_05955, ,psos,GTPase Era	TP_2849_00970, ,psos,GTPase Era	UFV1_02155, ,psos,GTPase Era,IDENTICAL PARALOGS:,UFV1_03050,GTPase Era	jx18_02850, ,psos,GTPase Era
149	TP6375_00765, ,psos,Predicted GTPase	2012CQ_ZSH_08455, ,psos,Predicted GTPase	Arash114_00760, ,psos,Predicted GTPase	Bu5_05055, ,psos,Predicted GTPase	DSM_20630_03050, ,psos,Predicted GTPase	MS249_06270, ,psos,Predicted GTPase	NCTC5224_05445, ,psos,Predicted GTPase	SH01_09705, ,psos,Predicted GTPase	SH02_06220, ,psos,Predicted GTPase	SH03_00750, ,psos,Predicted GTPase	TP1_03115, ,psos,Predicted GTPase	TP2_09105, ,psos,Predicted GTPase	TP3_03575, ,psos,Predicted GTPase	TP4_01075, ,psos,Predicted GTPase	TP4479_09920, ,psos,Predicted GTPase	TP8_05960, ,psos,Predicted GTPase	TP_2849_00975, ,psos,Predicted GTPase	UFV1_02160, ,psos,Predicted GTPase,IDENTICAL PARALOGS:,UFV1_03055,Predicted GTPase	jx18_02845, ,psos,Predicted GTPase
150	TP6375_00770, ,psos,Histidine--tRNA ligase	2012CQ_ZSH_08460, ,psos,Histidine--tRNA ligase	Arash114_00765, ,psos,Histidine--tRNA ligase	Bu5_05050, ,psos,Histidine--tRNA ligase	DSM_20630_03055, ,psos,Histidine--tRNA ligase	MS249_06275, ,psos,Histidine--tRNA ligase	NCTC5224_05450, ,psos,Histidine--tRNA ligase	SH01_09710, ,psos,Histidine--tRNA ligase	SH02_06225, ,psos,Histidine--tRNA ligase	SH03_00755, ,psos,Histidine--tRNA ligase	TP1_03110, ,psos,Histidine--tRNA ligase	TP2_09100, ,psos,Histidine--tRNA ligase	TP3_03580, ,psos,Histidine--tRNA ligase	TP4_01070, ,psos,Histidine--tRNA ligase	TP4479_09925, ,psos,Histidine--tRNA ligase	TP8_05965, ,psos,Histidine--tRNA ligase	TP_2849_00980, ,psos,Histidine--tRNA ligase	UFV1_02165, ,psos,Histidine--tRNA ligase,IDENTICAL PARALOGS:,UFV1_03060,Histidine--tRNA ligase	jx18_02840, ,psos,Histidine--tRNA ligase
151	TP6375_00775, ,psos,MBL fold metallo-hydrolase	2012CQ_ZSH_08465, ,psos,MBL fold metallo-hydrolase	Arash114_00770, ,psos,MBL fold metallo-hydrolase	Bu5_05045, ,psos,MBL fold metallo-hydrolase	DSM_20630_03060, ,psos,MBL fold metallo-hydrolase	MS249_06280, ,psos,MBL fold metallo-hydrolase	NCTC5224_05455, ,psos,MBL fold metallo-hydrolase	SH01_09715, ,psos,MBL fold metallo-hydrolase	SH02_06230, ,psos,MBL fold metallo-hydrolase	SH03_00760, ,psos,MBL fold metallo-hydrolase	TP1_03105, ,psos,MBL fold metallo-hydrolase	TP2_09095, ,psos,MBL fold metallo-hydrolase	TP3_03585, ,psos,MBL fold metallo-hydrolase	TP4_01065, ,psos,MBL fold metallo-hydrolase	TP4479_09930, ,psos,MBL fold metallo-hydrolase	TP8_05970, ,psos,MBL fold metallo-hydrolase	TP_2849_00985, ,psos,MBL fold metallo-hydrolase	UFV1_02170, ,psos,MBL fold metallo-hydrolase,IDENTICAL PARALOGS:,UFV1_03065,MBL fold metallo-hydrolase	jx18_02835, ,psos,MBL fold metallo-hydrolase
152	TP6375_00780, ,psos,DUF349 domain-containing protein	2012CQ_ZSH_08470, ,psos,DUF349 domain-containing protein	Arash114_00775, ,psos,DUF349 domain-containing protein	Bu5_05040, ,psos,DUF349 domain-containing protein	DSM_20630_03065, ,psos,DUF349 domain-containing protein	MS249_06285, ,psos,DUF349 domain-containing protein	NCTC5224_05460, ,psos,DUF349 domain-containing protein	SH01_09720, ,psos,DUF349 domain-containing protein	SH02_06235, ,psos,DUF349 domain-containing protein	SH03_00765, ,psos,DUF349 domain-containing protein	TP1_03100, ,psos,DUF349 domain-containing protein	TP2_09090, ,psos,DUF349 domain-containing protein	TP3_03590, ,psos,DUF349 domain-containing protein	TP4_01060, ,psos,DUF349 domain-containing protein	TP4479_09935, ,psos,DUF349 domain-containing protein	TP8_05975, ,psos,DUF349 domain-containing protein	TP_2849_00990, ,psos,DUF349 domain-containing protein	UFV1_02175, ,psos,DUF349 domain-containing protein,IDENTICAL PARALOGS:,UFV1_03070,DUF349 domain-containing protein	jx18_02830, ,psos,DUF349 domain-containing protein
153	TP6375_00785, ,psos,hypothetical protein	2012CQ_ZSH_08485, ,psos,hypothetical protein	Arash114_00780, ,psos,hypothetical protein	Bu5_05035, ,psos,hypothetical protein	DSM_20630_03070, ,psos,hypothetical protein	MS249_06290, ,psos,hypothetical protein	NCTC5224_05465, ,psos,hypothetical protein	SH01_09725, ,psos,hypothetical protein	SH02_06240, ,psos,hypothetical protein	SH03_00770, ,psos,hypothetical protein	TP1_03095, ,psos,hypothetical protein	TP2_09085, ,psos,hypothetical protein	TP3_03595, ,psos,hypothetical protein	TP4_01055, ,psos,hypothetical protein	TP4479_09940, ,psos,hypothetical protein	TP8_05980, ,psos,hypothetical protein	TP_2849_00995, ,psos,hypothetical protein	UFV1_02180, ,psos,hypothetical protein,IDENTICAL PARALOGS:,UFV1_03075,hypothetical protein	jx18_02825, ,psos,hypothetical protein
154	TP6375_00790, ,psos,Bifunctional (P)ppGpp synthase/hydrolase relA	2012CQ_ZSH_08490, ,psos,Bifunctional (P)ppGpp synthase/hydrolase relA	Arash114_00785, ,psos,Bifunctional (P)ppGpp synthase/hydrolase relA	Bu5_05030, ,psos,Bifunctional (P)ppGpp synthase/hydrolase relA	DSM_20630_03075, ,psos,Bifunctional (P)ppGpp synthase/hydrolase relA	MS249_06295, ,psos,Bifunctional (P)ppGpp synthase/hydrolase relA	NCTC5224_05470, ,psos,Bifunctional (P)ppGpp synthase/hydrolase relA	SH01_09730, ,psos,Bifunctional (P)ppGpp synthase/hydrolase relA	SH02_06245, ,psos,Bifunctional (P)ppGpp synthase/hydrolase relA	SH03_00775, ,psos,Bifunctional (P)ppGpp synthase/hydrolase relA	TP1_03090, ,psos,Bifunctional (P)ppGpp synthase/hydrolase relA	TP2_09080, ,psos,Bifunctional (P)ppGpp synthase/hydrolase relA	TP3_03600, ,psos,Bifunctional (P)ppGpp synthase/hydrolase relA	TP4_01050, ,psos,Bifunctional (P)ppGpp synthase/hydrolase relA	TP4479_09945, ,psos,Bifunctional (P)ppGpp synthase/hydrolase relA	TP8_05985, ,psos,Bifunctional (P)ppGpp synthase/hydrolase relA	TP_2849_01000, ,psos,Bifunctional (P)ppGpp synthase/hydrolase relA	UFV1_02185, ,psos,Bifunctional (P)ppGpp synthase/hydrolase relA,IDENTICAL PARALOGS:,UFV1_03080,Bifunctional (P)ppGpp synthase/hydrolase relA	jx18_02820, ,psos,Bifunctional (P)ppGpp synthase/hydrolase relA
155	TP6375_00795, ,psos,Adenine phosphoribosyltransferase	2012CQ_ZSH_08495, ,psos,Adenine phosphoribosyltransferase	Arash114_00790, ,psos,Adenine phosphoribosyltransferase	Bu5_05025, ,psos,Adenine phosphoribosyltransferase	DSM_20630_03080, ,psos,Adenine phosphoribosyltransferase	MS249_06300, ,psos,Adenine phosphoribosyltransferase	NCTC5224_05475, ,psos,Adenine phosphoribosyltransferase	SH01_09735, ,psos,Adenine phosphoribosyltransferase	SH02_06250, ,psos,Adenine phosphoribosyltransferase	SH03_00780, ,psos,Adenine phosphoribosyltransferase	TP1_03085, ,psos,Adenine phosphoribosyltransferase	TP2_09075, ,psos,Adenine phosphoribosyltransferase	TP3_03605, ,psos,Adenine phosphoribosyltransferase	TP4_01045, ,psos,Adenine phosphoribosyltransferase	TP4479_09950, ,psos,Adenine phosphoribosyltransferase	TP8_05990, ,psos,Adenine phosphoribosyltransferase	TP_2849_01005, ,psos,Adenine phosphoribosyltransferase	UFV1_02190, ,psos,Adenine phosphoribosyltransferase,IDENTICAL PARALOGS:,UFV1_03085,Adenine phosphoribosyltransferase	jx18_02815, ,psos,Adenine phosphoribosyltransferase
156	TP6375_00800, ,psos,Protein-export membrane protein SecF	2012CQ_ZSH_08500, ,psos,Protein-export membrane protein SecF	Arash114_00795, ,psos,Protein-export membrane protein SecF	Bu5_05020, ,psos,Protein-export membrane protein SecF	DSM_20630_03085, ,psos,Protein-export membrane protein SecF	MS249_06305, ,psos,Protein-export membrane protein SecF	NCTC5224_05480, ,psos,Protein-export membrane protein SecF	SH01_09740, ,psos,Protein-export membrane protein SecF	SH02_06255, ,psos,Protein-export membrane protein SecF	SH03_00785, ,psos,Protein-export membrane protein SecF	TP1_03080, ,psos,Protein-export membrane protein SecF	TP2_09070, ,psos,Protein-export membrane protein SecF	TP3_03610, ,psos,Protein-export membrane protein SecF	TP4_01040, ,psos,Protein-export membrane protein SecF	TP4479_09955, ,psos,Protein-export membrane protein SecF	TP8_05995, ,psos,Protein-export membrane protein SecF	TP_2849_01010, ,psos,Protein-export membrane protein SecF	UFV1_02195, ,psos,Protein-export membrane protein SecF,IDENTICAL PARALOGS:,UFV1_03090,Protein-export membrane protein SecF	jx18_02810, ,psos,Protein-export membrane protein SecF
157	TP6375_00805, ,psos,Protein translocase subunit SecD	2012CQ_ZSH_08505, ,psos,Protein translocase subunit SecD	Arash114_00800, ,psos,Protein translocase subunit SecD	Bu5_05015, ,psos,Protein translocase subunit SecD	DSM_20630_03090, ,psos,Protein translocase subunit SecD	MS249_06310, ,psos,Protein translocase subunit SecD	NCTC5224_05485, ,psos,Protein translocase subunit SecD	SH01_09745, ,psos,Protein translocase subunit SecD	SH02_06260, ,psos,Protein translocase subunit SecD	SH03_00790, ,psos,Protein translocase subunit SecD	TP1_03075, ,psos,Protein translocase subunit SecD	TP2_09065, ,psos,Protein translocase subunit SecD	TP3_03615, ,psos,Protein translocase subunit SecD	TP4_01035, ,psos,Protein translocase subunit SecD	TP4479_09960, ,psos,Protein translocase subunit SecD	TP8_06000, ,psos,Protein translocase subunit SecD	TP_2849_01015, ,psos,Protein translocase subunit SecD	UFV1_02200, ,psos,Protein translocase subunit SecD,IDENTICAL PARALOGS:,UFV1_03095,Protein translocase subunit SecD	jx18_02805, ,psos,Protein translocase subunit SecD
158	TP6375_00810, ,psos,Preprotein translocase subunit YajC	2012CQ_ZSH_08510, ,psos,Preprotein translocase subunit YajC	Arash114_00805, ,psos,Preprotein translocase subunit YajC	Bu5_05010, ,psos,Preprotein translocase subunit YajC	DSM_20630_03095, ,psos,Preprotein translocase subunit YajC	MS249_06315, ,psos,Preprotein translocase subunit YajC	NCTC5224_05490, ,psos,Preprotein translocase subunit YajC	SH01_09750, ,psos,Preprotein translocase subunit YajC	SH02_06265, ,psos,Preprotein translocase subunit YajC	SH03_00795, ,psos,Preprotein translocase subunit YajC	TP1_03070, ,psos,Preprotein translocase subunit YajC	TP2_09060, ,psos,Preprotein translocase subunit YajC	TP3_03620, ,psos,Preprotein translocase subunit YajC	TP4_01030, ,psos,Preprotein translocase subunit YajC	TP4479_09965, ,psos,Preprotein translocase subunit YajC	TP8_06005, ,psos,Preprotein translocase subunit YajC	TP_2849_01020, ,psos,Preprotein translocase subunit YajC	UFV1_02205, ,psos,Preprotein translocase subunit YajC,IDENTICAL PARALOGS:,UFV1_03100,Preprotein translocase subunit YajC	jx18_02800, ,psos,Preprotein translocase subunit YajC
159	TP6375_00815, ,psos,Holliday junction ATP-dependent DNA helicase RuvB	2012CQ_ZSH_08515, ,psos,Holliday junction ATP-dependent DNA helicase RuvB	Arash114_00810, ,psos,Holliday junction ATP-dependent DNA helicase RuvB	Bu5_05005, ,psos,Holliday junction ATP-dependent DNA helicase RuvB	DSM_20630_03100, ,psos,Holliday junction ATP-dependent DNA helicase RuvB	MS249_06320, ,psos,Holliday junction ATP-dependent DNA helicase RuvB	NCTC5224_05495, ,psos,Holliday junction ATP-dependent DNA helicase RuvB	SH01_09755, ,psos,Holliday junction ATP-dependent DNA helicase RuvB	SH02_06270, ,psos,Holliday junction ATP-dependent DNA helicase RuvB	SH03_00800, ,psos,Holliday junction ATP-dependent DNA helicase RuvB	TP1_03065, ,psos,Holliday junction ATP-dependent DNA helicase RuvB	TP2_09055, ,psos,Holliday junction ATP-dependent DNA helicase RuvB	TP3_03625, ,psos,Holliday junction ATP-dependent DNA helicase RuvB	TP4_01025, ,psos,Holliday junction ATP-dependent DNA helicase RuvB	TP4479_09970, ,psos,Holliday junction ATP-dependent DNA helicase RuvB	TP8_06010, ,psos,Holliday junction ATP-dependent DNA helicase RuvB	TP_2849_01025, ,psos,Holliday junction ATP-dependent DNA helicase RuvB	UFV1_02210, ,psos,Holliday junction ATP-dependent DNA helicase RuvB,IDENTICAL PARALOGS:,UFV1_03105,Holliday junction ATP-dependent DNA helicase RuvB	jx18_02795, ,psos,Holliday junction ATP-dependent DNA helicase RuvB
160	TP6375_00820, ,psos,Holliday junction ATP-dependent DNA helicase RuvA	2012CQ_ZSH_08520, ,psos,Holliday junction ATP-dependent DNA helicase RuvA	Arash114_00815, ,psos,Holliday junction ATP-dependent DNA helicase RuvA	Bu5_05000, ,psos,Holliday junction ATP-dependent DNA helicase RuvA	DSM_20630_03105, ,psos,Holliday junction ATP-dependent DNA helicase RuvA	MS249_06325, ,psos,Holliday junction ATP-dependent DNA helicase RuvA	NCTC5224_05500, ,psos,Holliday junction ATP-dependent DNA helicase RuvA	SH01_09760, ,psos,Holliday junction ATP-dependent DNA helicase RuvA	SH02_06275, ,psos,Holliday junction ATP-dependent DNA helicase RuvA	SH03_00805, ,psos,Holliday junction ATP-dependent DNA helicase RuvA	TP1_03060, ,psos,Holliday junction ATP-dependent DNA helicase RuvA	TP2_09050, ,psos,Holliday junction ATP-dependent DNA helicase RuvA	TP3_03630, ,psos,Holliday junction ATP-dependent DNA helicase RuvA	TP4_01020, ,psos,Holliday junction ATP-dependent DNA helicase RuvA	TP4479_09975, ,psos,Holliday junction ATP-dependent DNA helicase RuvA	TP8_06015, ,psos,Holliday junction ATP-dependent DNA helicase RuvA	TP_2849_01030, ,psos,Holliday junction ATP-dependent DNA helicase RuvA	UFV1_02215, ,psos,Holliday junction ATP-dependent DNA helicase RuvA,IDENTICAL PARALOGS:,UFV1_03110,Holliday junction ATP-dependent DNA helicase RuvA	jx18_02790, ,psos,Holliday junction ATP-dependent DNA helicase RuvA
161	TP6375_00825, ,psos,Crossover junction endodeoxyribonuclease RuvC	2012CQ_ZSH_08525, ,psos,Crossover junction endodeoxyribonuclease RuvC	Arash114_00820, ,psos,Crossover junction endodeoxyribonuclease RuvC	Bu5_04995, ,psos,Crossover junction endodeoxyribonuclease RuvC	DSM_20630_03110, ,psos,Crossover junction endodeoxyribonuclease RuvC	MS249_06330, ,psos,Crossover junction endodeoxyribonuclease RuvC	NCTC5224_05505, ,psos,Crossover junction endodeoxyribonuclease RuvC	SH01_09765, ,psos,Crossover junction endodeoxyribonuclease RuvC	SH02_06280, ,psos,Crossover junction endodeoxyribonuclease RuvC	SH03_00810, ,psos,Crossover junction endodeoxyribonuclease RuvC	TP1_03055, ,psos,Crossover junction endodeoxyribonuclease RuvC	TP2_09045, ,psos,Crossover junction endodeoxyribonuclease RuvC	TP3_03635, ,psos,Crossover junction endodeoxyribonuclease RuvC	TP4_01015, ,psos,Crossover junction endodeoxyribonuclease RuvC	TP4479_09980, ,psos,Crossover junction endodeoxyribonuclease RuvC	TP8_06020, ,psos,Crossover junction endodeoxyribonuclease RuvC	TP_2849_01035, ,psos,Crossover junction endodeoxyribonuclease RuvC	UFV1_02220, ,psos,Crossover junction endodeoxyribonuclease RuvC,IDENTICAL PARALOGS:,UFV1_03115,Crossover junction endodeoxyribonuclease RuvC	jx18_02785, ,psos,Crossover junction endodeoxyribonuclease RuvC
162	TP6375_00830, ,psos,Probable transcriptional regulatory protein DBV13_00825	2012CQ_ZSH_08530, ,psos,Probable transcriptional regulatory protein DBV13_00825	Arash114_00825, ,psos,Probable transcriptional regulatory protein DBV13_00825	Bu5_04990, ,psos,Probable transcriptional regulatory protein DBV13_00825	DSM_20630_03115, ,psos,Probable transcriptional regulatory protein DBV13_00825	MS249_06335, ,psos,Probable transcriptional regulatory protein DBV13_00825	NCTC5224_05510, ,psos,Probable transcriptional regulatory protein DBV13_00825	SH01_09770, ,psos,Probable transcriptional regulatory protein DBV13_00825	SH02_06285, ,psos,Probable transcriptional regulatory protein DBV13_00825	SH03_00815, ,psos,Probable transcriptional regulatory protein DBV13_00825	TP1_03050, ,psos,Probable transcriptional regulatory protein DBV13_00825	TP2_09040, ,psos,Probable transcriptional regulatory protein DBV13_00825	TP3_03640, ,psos,Probable transcriptional regulatory protein DBV13_00825	TP4_01010, ,psos,Probable transcriptional regulatory protein DBV13_00825	TP4479_09985, ,psos,Probable transcriptional regulatory protein DBV13_00825	TP8_06025, ,psos,Probable transcriptional regulatory protein DBV13_00825	TP_2849_01040, ,psos,Probable transcriptional regulatory protein DBV13_00825	UFV1_02225, ,psos,Probable transcriptional regulatory protein DBV13_00825,IDENTICAL PARALOGS:,UFV1_03120,Probable transcriptional regulatory protein DBV13_00825	jx18_02780, ,psos,Probable transcriptional regulatory protein DBV13_00825
163	TP6375_00835, ,psos,NUDIX domain-containing protein	2012CQ_ZSH_08535, ,psos,NUDIX domain-containing protein	Arash114_00830, ,psos,NUDIX domain-containing protein	Bu5_04985, ,psos,NUDIX domain-containing protein	DSM_20630_03120, ,psos,NUDIX domain-containing protein	MS249_06340, ,psos,NUDIX domain-containing protein	NCTC5224_05515, ,psos,NUDIX domain-containing protein	SH01_09775, ,psos,NUDIX domain-containing protein	SH02_06290, ,psos,NUDIX domain-containing protein	SH03_00820, ,psos,NUDIX domain-containing protein	TP1_03045, ,psos,NUDIX domain-containing protein	TP2_09035, ,psos,NUDIX domain-containing protein	TP3_03645, ,psos,NUDIX domain-containing protein	TP4_01005, ,psos,NUDIX domain-containing protein	TP4479_09990, ,psos,NUDIX domain-containing protein	TP8_06030, ,psos,NUDIX domain-containing protein	TP_2849_01045, ,psos,NUDIX domain-containing protein	UFV1_02230, ,psos,NUDIX domain-containing protein,IDENTICAL PARALOGS:,UFV1_03125,NUDIX domain-containing protein	jx18_02775, ,psos,NUDIX domain-containing protein
164	TP6375_00840, ,psos,hypothetical protein	2012CQ_ZSH_08540, ,psos,hypothetical protein	Arash114_00835, ,psos,hypothetical protein	Bu5_04980, ,psos,hypothetical protein	DSM_20630_03125, ,psos,hypothetical protein	MS249_06345, ,psos,hypothetical protein	NCTC5224_05520, ,psos,hypothetical protein	SH01_09780, ,psos,hypothetical protein	SH02_06295, ,psos,hypothetical protein	SH03_00825, ,psos,hypothetical protein	TP1_03040, ,psos,hypothetical protein	TP2_09030, ,psos,hypothetical protein	TP3_03650, ,psos,hypothetical protein	TP4_01000, ,psos,hypothetical protein	TP4479_09995, ,psos,hypothetical protein	TP8_06035, ,psos,hypothetical protein	TP_2849_01050, ,psos,hypothetical protein	UFV1_02235, ,psos,hypothetical protein,IDENTICAL PARALOGS:,UFV1_03130,hypothetical protein	jx18_02770, ,psos,hypothetical protein
165	TP6375_00845, ,psos,GDP-mannose-dependent alpha-(1-2)-phosphatidylinositol mannosyltransferase	2012CQ_ZSH_08545, ,psos,GDP-mannose-dependent alpha-(1-2)-phosphatidylinositol mannosyltransferase	Arash114_00840, ,psos,GDP-mannose-dependent alpha-(1-2)-phosphatidylinositol mannosyltransferase	Bu5_04975, ,psos,GDP-mannose-dependent alpha-(1-2)-phosphatidylinositol mannosyltransferase	DSM_20630_03130, ,psos,GDP-mannose-dependent alpha-(1-2)-phosphatidylinositol mannosyltransferase	MS249_06350, ,psos,GDP-mannose-dependent alpha-(1-2)-phosphatidylinositol mannosyltransferase	NCTC5224_05525, ,psos,GDP-mannose-dependent alpha-(1-2)-phosphatidylinositol mannosyltransferase	SH01_09785, ,psos,GDP-mannose-dependent alpha-(1-2)-phosphatidylinositol mannosyltransferase	SH02_06300, ,psos,GDP-mannose-dependent alpha-(1-2)-phosphatidylinositol mannosyltransferase	SH03_00830, ,psos,GDP-mannose-dependent alpha-(1-2)-phosphatidylinositol mannosyltransferase	TP1_03035, ,psos,GDP-mannose-dependent alpha-(1-2)-phosphatidylinositol mannosyltransferase	TP2_09025, ,psos,GDP-mannose-dependent alpha-(1-2)-phosphatidylinositol mannosyltransferase	TP3_03655, ,psos,GDP-mannose-dependent alpha-(1-2)-phosphatidylinositol mannosyltransferase	TP4_00995, ,psos,GDP-mannose-dependent alpha-(1-2)-phosphatidylinositol mannosyltransferase	TP4479_10000, ,psos,GDP-mannose-dependent alpha-(1-2)-phosphatidylinositol mannosyltransferase	TP8_06040, ,psos,GDP-mannose-dependent alpha-(1-2)-phosphatidylinositol mannosyltransferase	TP_2849_01055, ,psos,GDP-mannose-dependent alpha-(1-2)-phosphatidylinositol mannosyltransferase	UFV1_02240, ,psos,GDP-mannose-dependent alpha-(1-2)-phosphatidylinositol mannosyltransferase,IDENTICAL PARALOGS:,UFV1_03135,GDP-mannose-dependent alpha-(1-2)-phosphatidylinositol mannosyltransferase	jx18_02765, ,psos,GDP-mannose-dependent alpha-(1-2)-phosphatidylinositol mannosyltransferase
166	TP6375_00850, ,psos,Phosphatidylinositol mannoside acyltransferase	2012CQ_ZSH_08550, ,psos,Phosphatidylinositol mannoside acyltransferase	Arash114_00845, ,psos,Phosphatidylinositol mannoside acyltransferase	Bu5_04970, ,psos,Phosphatidylinositol mannoside acyltransferase	DSM_20630_03135, ,psos,Phosphatidylinositol mannoside acyltransferase	MS249_06355, ,psos,Phosphatidylinositol mannoside acyltransferase	NCTC5224_05530, ,psos,Phosphatidylinositol mannoside acyltransferase	SH01_09790, ,psos,Phosphatidylinositol mannoside acyltransferase	SH02_06305, ,psos,Phosphatidylinositol mannoside acyltransferase	SH03_00835, ,psos,Phosphatidylinositol mannoside acyltransferase	TP1_03030, ,psos,Phosphatidylinositol mannoside acyltransferase	TP2_09020, ,psos,Phosphatidylinositol mannoside acyltransferase	TP3_03660, ,psos,Phosphatidylinositol mannoside acyltransferase	TP4_00990, ,psos,Phosphatidylinositol mannoside acyltransferase	TP4479_10005, ,psos,Phosphatidylinositol mannoside acyltransferase	TP8_06045, ,psos,Phosphatidylinositol mannoside acyltransferase	TP_2849_01060, ,psos,Phosphatidylinositol mannoside acyltransferase	UFV1_02245, ,psos,Phosphatidylinositol mannoside acyltransferase,IDENTICAL PARALOGS:,UFV1_03140,Phosphatidylinositol mannoside acyltransferase	jx18_02760, ,psos,Phosphatidylinositol mannoside acyltransferase
167	TP6375_00855, ,psos,CDP-diacylglycerol--inositol 3-phosphatidyltransferase	2012CQ_ZSH_08555, ,psos,CDP-diacylglycerol--inositol 3-phosphatidyltransferase	Arash114_00850, ,psos,CDP-diacylglycerol--inositol 3-phosphatidyltransferase	Bu5_04965, ,psos,CDP-diacylglycerol--inositol 3-phosphatidyltransferase	DSM_20630_03140, ,psos,CDP-diacylglycerol--inositol 3-phosphatidyltransferase	MS249_06360, ,psos,CDP-diacylglycerol--inositol 3-phosphatidyltransferase	NCTC5224_05535, ,psos,CDP-diacylglycerol--inositol 3-phosphatidyltransferase	SH01_09795, ,psos,CDP-diacylglycerol--inositol 3-phosphatidyltransferase	SH02_06310, ,psos,CDP-diacylglycerol--inositol 3-phosphatidyltransferase	SH03_00840, ,psos,CDP-diacylglycerol--inositol 3-phosphatidyltransferase	TP1_03025, ,psos,CDP-diacylglycerol--inositol 3-phosphatidyltransferase	TP2_09015, ,psos,CDP-diacylglycerol--inositol 3-phosphatidyltransferase	TP3_03665, ,psos,CDP-diacylglycerol--inositol 3-phosphatidyltransferase	TP4_00985, ,psos,CDP-diacylglycerol--inositol 3-phosphatidyltransferase	TP4479_10010, ,psos,CDP-diacylglycerol--inositol 3-phosphatidyltransferase	TP8_06050, ,psos,CDP-diacylglycerol--inositol 3-phosphatidyltransferase	TP_2849_01065, ,psos,CDP-diacylglycerol--inositol 3-phosphatidyltransferase	UFV1_02250, ,psos,CDP-diacylglycerol--inositol 3-phosphatidyltransferase,IDENTICAL PARALOGS:,UFV1_03145,CDP-diacylglycerol--inositol 3-phosphatidyltransferase	jx18_02755, ,psos,CDP-diacylglycerol--inositol 3-phosphatidyltransferase
168	TP6375_00860, ,psos,Threonine--tRNA ligase	2012CQ_ZSH_08560, ,psos,Threonine--tRNA ligase	Arash114_00855, ,psos,Threonine--tRNA ligase	Bu5_04960, ,psos,Threonine--tRNA ligase	DSM_20630_03145, ,psos,Threonine--tRNA ligase	MS249_06365, ,psos,Threonine--tRNA ligase	NCTC5224_05540, ,psos,Threonine--tRNA ligase	SH01_09800, ,psos,Threonine--tRNA ligase	SH02_06315, ,psos,Threonine--tRNA ligase	SH03_00845, ,psos,Threonine--tRNA ligase	TP1_03020, ,psos,Threonine--tRNA ligase	TP2_09010, ,psos,Threonine--tRNA ligase	TP3_03670, ,psos,Threonine--tRNA ligase	TP4_00980, ,psos,Threonine--tRNA ligase	TP4479_10015, ,psos,Threonine--tRNA ligase	TP8_06055, ,psos,Threonine--tRNA ligase	TP_2849_01070, ,psos,Threonine--tRNA ligase	UFV1_02255, ,psos,Threonine--tRNA ligase,IDENTICAL PARALOGS:,UFV1_03150,Threonine--tRNA ligase	jx18_02750, ,psos,Threonine--tRNA ligase
169	TP6375_00865, ,psos,L-serine dehydratase	2012CQ_ZSH_08565, ,psos,L-serine dehydratase	Arash114_00860, ,psos,L-serine dehydratase	Bu5_04955, ,psos,L-serine dehydratase	DSM_20630_03150, ,psos,L-serine dehydratase	MS249_06370, ,psos,L-serine dehydratase	NCTC5224_05545, ,psos,L-serine dehydratase	SH01_09805, ,psos,L-serine dehydratase	SH02_06320, ,psos,L-serine dehydratase	SH03_00850, ,psos,L-serine dehydratase	TP1_03015, ,psos,L-serine dehydratase	TP2_09005, ,psos,L-serine dehydratase	TP3_03675, ,psos,L-serine dehydratase	TP4_00975, ,psos,L-serine dehydratase	TP4479_10020, ,psos,L-serine dehydratase	TP8_06060, ,psos,L-serine dehydratase	TP_2849_01075, ,psos,L-serine dehydratase	UFV1_02260, ,psos,L-serine dehydratase,IDENTICAL PARALOGS:,UFV1_03155,L-serine dehydratase	jx18_02745, ,psos,L-serine dehydratase
170	TP6375_00870, ,psos,DNA-binding response regulator	2012CQ_ZSH_08570, ,psos,DNA-binding response regulator	Arash114_00865, ,psos,DNA-binding response regulator	Bu5_04950, ,psos,DNA-binding response regulator	DSM_20630_03155, ,psos,DNA-binding response regulator	MS249_06375, ,psos,DNA-binding response regulator	NCTC5224_05550, ,psos,DNA-binding response regulator	SH01_09810, ,psos,DNA-binding response regulator	SH02_06325, ,psos,DNA-binding response regulator	SH03_00855, ,psos,DNA-binding response regulator	TP1_03010, ,psos,DNA-binding response regulator	TP2_09000, ,psos,DNA-binding response regulator	TP3_03680, ,psos,DNA-binding response regulator	TP4_00970, ,psos,DNA-binding response regulator	TP4479_10025, ,psos,DNA-binding response regulator	TP8_06065, ,psos,DNA-binding response regulator	TP_2849_01080, ,psos,DNA-binding response regulator	UFV1_02265, ,psos,DNA-binding response regulator,IDENTICAL PARALOGS:,UFV1_03160,DNA-binding response regulator	jx18_02740, ,psos,DNA-binding response regulator
171	TP6375_00875, ,psos,ATP-binding protein	2012CQ_ZSH_08575, ,psos,ATP-binding protein	Arash114_00870, ,psos,ATP-binding protein	Bu5_04945, ,psos,ATP-binding protein	DSM_20630_03160, ,psos,ATP-binding protein	MS249_06380, ,psos,ATP-binding protein	NCTC5224_05555, ,psos,ATP-binding protein	SH01_09815, ,psos,ATP-binding protein	SH02_06330, ,psos,ATP-binding protein	SH03_00860, ,psos,ATP-binding protein	TP1_03005, ,psos,ATP-binding protein	TP2_08995, ,psos,ATP-binding protein	TP3_03685, ,psos,ATP-binding protein	TP4_00965, ,psos,ATP-binding protein	TP4479_10030, ,psos,ATP-binding protein	TP8_06070, ,psos,ATP-binding protein	TP_2849_01085, ,psos,ATP-binding protein	UFV1_02270, ,psos,ATP-binding protein,IDENTICAL PARALOGS:,UFV1_03165,ATP-binding protein	jx18_02735, ,psos,ATP-binding protein
172	TP6375_00880, ,psos,PspC domain-containing protein	2012CQ_ZSH_08580, ,psos,PspC domain-containing protein	Arash114_00875, ,psos,PspC domain-containing protein	Bu5_04940, ,psos,PspC domain-containing protein	DSM_20630_03165, ,psos,PspC domain-containing protein	MS249_06385, ,psos,PspC domain-containing protein	NCTC5224_05560, ,psos,PspC domain-containing protein	SH01_09820, ,psos,PspC domain-containing protein	SH02_06335, ,psos,PspC domain-containing protein	SH03_00865, ,psos,PspC domain-containing protein	TP1_03000, ,psos,PspC domain-containing protein	TP2_08990, ,psos,PspC domain-containing protein	TP3_03690, ,psos,PspC domain-containing protein	TP4_00960, ,psos,PspC domain-containing protein	TP4479_10035, ,psos,PspC domain-containing protein	TP8_06075, ,psos,PspC domain-containing protein	TP_2849_01090, ,psos,PspC domain-containing protein	UFV1_02275, ,psos,PspC domain-containing protein,IDENTICAL PARALOGS:,UFV1_03170,PspC domain-containing protein	jx18_02730, ,psos,PspC domain-containing protein
173	TP6375_00885, ,psos,hypothetical protein	2012CQ_ZSH_08585, ,psos,hypothetical protein	Arash114_00880, ,psos,hypothetical protein	Bu5_04935, ,psos,hypothetical protein	DSM_20630_03170, ,psos,hypothetical protein	MS249_06390, ,psos,hypothetical protein	NCTC5224_05565, ,psos,hypothetical protein	SH01_09825, ,psos,hypothetical protein	SH02_06340, ,psos,hypothetical protein	SH03_00870, ,psos,hypothetical protein	TP1_02995, ,psos,hypothetical protein	TP2_08985, ,psos,hypothetical protein	TP3_03695, ,psos,hypothetical protein	TP4_00955, ,psos,hypothetical protein	TP4479_10040, ,psos,hypothetical protein	TP8_06080, ,psos,hypothetical protein	TP_2849_01095, ,psos,hypothetical protein	UFV1_02280, ,psos,hypothetical protein,IDENTICAL PARALOGS:,UFV1_03175,hypothetical protein	jx18_02725, ,psos,hypothetical protein
174	TP6375_00910, ,psos,Glycogen debranching enzyme	2012CQ_ZSH_08625, ,psos,Glycogen debranching enzyme	Arash114_00905, ,psos,Glycogen debranching enzyme	Bu5_04910, ,psos,Glycogen debranching enzyme	DSM_20630_03195, ,psos,Glycogen debranching enzyme	MS249_06415, ,psos,Glycogen debranching enzyme	NCTC5224_05590, ,psos,Glycogen debranching enzyme	SH01_10605, ,psos,Glycogen debranching enzyme	SH02_06375, ,psos,Glycogen debranching enzyme	SH03_00905, ,psos,Glycogen debranching enzyme	TP1_02970, ,psos,Glycogen debranching enzyme	TP2_08945, ,psos,Glycogen debranching enzyme	TP3_03730, ,psos,Glycogen debranching enzyme	TP4_00920, ,psos,Glycogen debranching enzyme	TP4479_10075, ,psos,Glycogen debranching enzyme	TP8_06105, ,psos,Glycogen debranching enzyme	TP_2849_01130, ,psos,Glycogen debranching enzyme	UFV1_02305, ,psos,Glycogen debranching enzyme,IDENTICAL PARALOGS:,UFV1_03200,Glycogen debranching enzyme	jx18_02700, ,psos,Glycogen debranching enzyme
175	TP6375_00915, ,psos,Maltooligosyl trehalose synthase	2012CQ_ZSH_08630, ,psos,Maltooligosyl trehalose synthase	Arash114_00910, ,psos,Maltooligosyl trehalose synthase	Bu5_04905, ,psos,Maltooligosyl trehalose synthase	DSM_20630_03200, ,psos,Maltooligosyl trehalose synthase	MS249_06420, ,psos,Maltooligosyl trehalose synthase	NCTC5224_05595, ,psos,Maltooligosyl trehalose synthase	SH01_10600, ,psos,Maltooligosyl trehalose synthase	SH02_06380, ,psos,Maltooligosyl trehalose synthase	SH03_00910, ,psos,Maltooligosyl trehalose synthase	TP1_02965, ,psos,Maltooligosyl trehalose synthase	TP2_08940, ,psos,Maltooligosyl trehalose synthase	TP3_03735, ,psos,Maltooligosyl trehalose synthase	TP4_00915, ,psos,Maltooligosyl trehalose synthase	TP4479_10080, ,psos,Maltooligosyl trehalose synthase	TP8_06110, ,psos,Maltooligosyl trehalose synthase	TP_2849_01135, ,psos,Maltooligosyl trehalose synthase	UFV1_02310, ,psos,Maltooligosyl trehalose synthase,IDENTICAL PARALOGS:,UFV1_03205,Maltooligosyl trehalose synthase	jx18_02695, ,psos,Maltooligosyl trehalose synthase
176	TP6375_00920, ,psos,Malto-oligosyltrehalose trehalohydrolase	2012CQ_ZSH_08635, ,psos,Malto-oligosyltrehalose trehalohydrolase	Arash114_00915, ,psos,Malto-oligosyltrehalose trehalohydrolase	Bu5_04900, ,psos,Malto-oligosyltrehalose trehalohydrolase	DSM_20630_03205, ,psos,Malto-oligosyltrehalose trehalohydrolase	MS249_06425, ,psos,Malto-oligosyltrehalose trehalohydrolase	NCTC5224_05600, ,psos,Malto-oligosyltrehalose trehalohydrolase	SH01_10595, ,psos,Malto-oligosyltrehalose trehalohydrolase	SH02_06385, ,psos,Malto-oligosyltrehalose trehalohydrolase	SH03_00915, ,psos,Malto-oligosyltrehalose trehalohydrolase	TP1_02960, ,psos,Malto-oligosyltrehalose trehalohydrolase	TP2_08935, ,psos,Malto-oligosyltrehalose trehalohydrolase	TP3_03740, ,psos,Malto-oligosyltrehalose trehalohydrolase	TP4_00910, ,psos,Malto-oligosyltrehalose trehalohydrolase	TP4479_10085, ,psos,Malto-oligosyltrehalose trehalohydrolase	TP8_06115, ,psos,Malto-oligosyltrehalose trehalohydrolase	TP_2849_01140, ,psos,Malto-oligosyltrehalose trehalohydrolase	UFV1_02315, ,psos,Malto-oligosyltrehalose trehalohydrolase,IDENTICAL PARALOGS:,UFV1_03210,Malto-oligosyltrehalose trehalohydrolase	jx18_02690, ,psos,Malto-oligosyltrehalose trehalohydrolase
177	TP6375_00925, ,psos,DUF3000 domain-containing protein	2012CQ_ZSH_08640, ,psos,DUF3000 domain-containing protein	Arash114_00920, ,psos,DUF3000 domain-containing protein	Bu5_04895, ,psos,DUF3000 domain-containing protein	DSM_20630_03210, ,psos,DUF3000 domain-containing protein	MS249_06430, ,psos,DUF3000 domain-containing protein	NCTC5224_00035, ,psos,DUF3000 domain-containing protein,IDENTICAL PARALOGS:,NCTC5224_05605,DUF3000 domain-containing protein	SH01_10590, ,psos,DUF3000 domain-containing protein	SH02_06390, ,psos,DUF3000 domain-containing protein	SH03_00920, ,psos,DUF3000 domain-containing protein	TP1_02955, ,psos,DUF3000 domain-containing protein	TP2_08930, ,psos,DUF3000 domain-containing protein	TP3_03745, ,psos,DUF3000 domain-containing protein	TP4_00905, ,psos,DUF3000 domain-containing protein	TP4479_10090, ,psos,DUF3000 domain-containing protein	TP8_06120, ,psos,DUF3000 domain-containing protein	TP_2849_01145, ,psos,DUF3000 domain-containing protein	UFV1_02320, ,psos,DUF3000 domain-containing protein,IDENTICAL PARALOGS:,UFV1_03215,DUF3000 domain-containing protein	jx18_02685, ,psos,DUF3000 domain-containing protein
178	TP6375_00930, ,psos,Ribonuclease D	2012CQ_ZSH_08645, ,psos,Ribonuclease D	Arash114_00925, ,psos,Ribonuclease D	Bu5_04890, ,psos,Ribonuclease D	DSM_20630_03215, ,psos,Ribonuclease D	MS249_06435, ,psos,Ribonuclease D	NCTC5224_05610, ,psos,Ribonuclease D	SH01_10585, ,psos,Ribonuclease D	SH02_06395, ,psos,Ribonuclease D	SH03_00925, ,psos,Ribonuclease D	TP1_02950, ,psos,Ribonuclease D	TP2_08925, ,psos,Ribonuclease D	TP3_03750, ,psos,Ribonuclease D	TP4_00900, ,psos,Ribonuclease D	TP4479_10095, ,psos,Ribonuclease D	TP8_06125, ,psos,Ribonuclease D	TP_2849_01150, ,psos,Ribonuclease D	UFV1_02325, ,psos,Ribonuclease D,IDENTICAL PARALOGS:,UFV1_03220,Ribonuclease D	jx18_02680, ,psos,Ribonuclease D
179	TP6375_00935, ,psos,1-deoxy-D-xylulose-5-phosphate synthase	2012CQ_ZSH_08650, ,psos,1-deoxy-D-xylulose-5-phosphate synthase	Arash114_00930, ,psos,1-deoxy-D-xylulose-5-phosphate synthase	Bu5_04885, ,psos,1-deoxy-D-xylulose-5-phosphate synthase	DSM_20630_03220, ,psos,1-deoxy-D-xylulose-5-phosphate synthase	MS249_06440, ,psos,1-deoxy-D-xylulose-5-phosphate synthase	NCTC5224_05615, ,psos,1-deoxy-D-xylulose-5-phosphate synthase	SH01_10580, ,psos,1-deoxy-D-xylulose-5-phosphate synthase	SH02_06400, ,psos,1-deoxy-D-xylulose-5-phosphate synthase	SH03_00930, ,psos,1-deoxy-D-xylulose-5-phosphate synthase	TP1_02945, ,psos,1-deoxy-D-xylulose-5-phosphate synthase	TP2_08920, ,psos,1-deoxy-D-xylulose-5-phosphate synthase	TP3_03755, ,psos,1-deoxy-D-xylulose-5-phosphate synthase	TP4_00895, ,psos,1-deoxy-D-xylulose-5-phosphate synthase	TP4479_10100, ,psos,1-deoxy-D-xylulose-5-phosphate synthase	TP8_06130, ,psos,1-deoxy-D-xylulose-5-phosphate synthase	TP_2849_01155, ,psos,1-deoxy-D-xylulose-5-phosphate synthase	UFV1_02330, ,psos,1-deoxy-D-xylulose-5-phosphate synthase,IDENTICAL PARALOGS:,UFV1_03225,1-deoxy-D-xylulose-5-phosphate synthase	jx18_02675, ,psos,1-deoxy-D-xylulose-5-phosphate synthase
180	TP6375_00940, ,psos,hypothetical protein	2012CQ_ZSH_08655, ,psos,hypothetical protein	Arash114_00935, ,psos,hypothetical protein	Bu5_04880, ,psos,hypothetical protein	DSM_20630_03225, ,psos,FG-GAP repeat	- , -	NCTC5224_05620, ,psos,FG-GAP repeat	SH01_10575, ,psos,hypothetical protein	SH02_06405, ,psos,hypothetical protein	SH03_00935, ,psos,hypothetical protein	TP1_02940, ,psos,hypothetical protein	TP2_08915, ,psos,hypothetical protein	TP3_03760, ,psos,hypothetical protein	TP4_00890, ,psos,hypothetical protein	TP4479_10105, ,psos,hypothetical protein	TP8_06135, ,psos,hypothetical protein	TP_2849_01160, ,psos,hypothetical protein	UFV1_02335, ,psos,hypothetical protein,IDENTICAL PARALOGS:,UFV1_03230,hypothetical protein	jx18_02670, ,psos,hypothetical protein
181	TP6375_00945, ,psos,Aconitate hydratase	2012CQ_ZSH_08660, ,psos,Aconitate hydratase	Arash114_00940, ,psos,Aconitate hydratase	Bu5_04875, ,psos,Aconitate hydratase	DSM_20630_03230, ,psos,Aconitate hydratase	MS249_06445, ,psos,Aconitate hydratase	NCTC5224_05625, ,psos,Aconitate hydratase	SH01_10570, ,psos,Aconitate hydratase	SH02_06410, ,psos,Aconitate hydratase	SH03_00940, ,psos,Aconitate hydratase	TP1_02935, ,psos,Aconitate hydratase	TP2_08910, ,psos,Aconitate hydratase	TP3_03765, ,psos,Aconitate hydratase	TP4_00885, ,psos,Aconitate hydratase	TP4479_10110, ,psos,Aconitate hydratase	TP8_06140, ,psos,Aconitate hydratase	TP_2849_01165, ,psos,Aconitate hydratase	UFV1_02340, ,psos,Aconitate hydratase,IDENTICAL PARALOGS:,UFV1_03235,Aconitate hydratase	jx18_02665, ,psos,Aconitate hydratase
182	TP6375_00950, ,psos,Uncharacterized RNA methyltransferase Cgl1903/cg2084	2012CQ_ZSH_08665, ,psos,Uncharacterized RNA methyltransferase Cgl1903/cg2084	Arash114_00945, ,psos,Uncharacterized RNA methyltransferase Cgl1903/cg2084	Bu5_04870, ,psos,Uncharacterized RNA methyltransferase Cgl1903/cg2084	DSM_20630_03235, ,psos,Uncharacterized RNA methyltransferase Cgl1903/cg2084	MS249_06450, ,psos,Uncharacterized RNA methyltransferase Cgl1903/cg2084	NCTC5224_05630, ,psos,Uncharacterized RNA methyltransferase Cgl1903/cg2084	SH01_10565, ,psos,Uncharacterized RNA methyltransferase Cgl1903/cg2084	SH02_06415, ,psos,Uncharacterized RNA methyltransferase Cgl1903/cg2084	SH03_00945, ,psos,Uncharacterized RNA methyltransferase Cgl1903/cg2084	TP1_02930, ,psos,Uncharacterized RNA methyltransferase Cgl1903/cg2084	TP2_08905, ,psos,Uncharacterized RNA methyltransferase Cgl1903/cg2084	TP3_03770, ,psos,Uncharacterized RNA methyltransferase Cgl1903/cg2084	TP4_00880, ,psos,Uncharacterized RNA methyltransferase Cgl1903/cg2084	TP4479_10115, ,psos,Uncharacterized RNA methyltransferase Cgl1903/cg2084	TP8_06145, ,psos,Uncharacterized RNA methyltransferase Cgl1903/cg2084	TP_2849_01170, ,psos,Uncharacterized RNA methyltransferase Cgl1903/cg2084	UFV1_02345, ,psos,Uncharacterized RNA methyltransferase Cgl1903/cg2084,IDENTICAL PARALOGS:,UFV1_03240,Uncharacterized RNA methyltransferase Cgl1903/cg2084	jx18_02660, ,psos,Uncharacterized RNA methyltransferase Cgl1903/cg2084
183	TP6375_00955, ,psos,APC family permease	2012CQ_ZSH_08670, ,psos,APC family permease	Arash114_00950, ,psos,APC family permease	Bu5_04865, ,psos,APC family permease	DSM_20630_03240, ,psos,APC family permease	MS249_06455, ,psos,APC family permease	NCTC5224_05635, ,psos,APC family permease	SH01_10560, ,psos,APC family permease	SH02_06420, ,psos,APC family permease	SH03_00950, ,psos,APC family permease	TP1_02925, ,psos,APC family permease	TP2_08900, ,psos,APC family permease	TP3_03775, ,psos,APC family permease	TP4_00875, ,psos,APC family permease	TP4479_10120, ,psos,APC family permease	TP8_06150, ,psos,APC family permease	TP_2849_01175, ,psos,APC family permease	UFV1_02350, ,psos,APC family permease,IDENTICAL PARALOGS:,UFV1_03245,APC family permease	jx18_02655, ,psos,APC family permease
184	TP6375_00960, ,psos,Trk system potassium uptake protein trkA	2012CQ_ZSH_08675, ,psos,Trk system potassium uptake protein trkA	Arash114_00955, ,psos,Trk system potassium uptake protein trkA	Bu5_04860, ,psos,Trk system potassium uptake protein trkA	DSM_20630_03245, ,psos,Trk system potassium uptake protein trkA	MS249_06460, ,psos,Trk system potassium uptake protein trkA	NCTC5224_05640, ,psos,Trk system potassium uptake protein trkA	SH01_10555, ,psos,Trk system potassium uptake protein trkA	SH02_06425, ,psos,Trk system potassium uptake protein trkA	SH03_00955, ,psos,Trk system potassium uptake protein trkA	TP1_02920, ,psos,Trk system potassium uptake protein trkA	TP2_08895, ,psos,Trk system potassium uptake protein trkA	TP3_03780, ,psos,Trk system potassium uptake protein trkA	TP4_00870, ,psos,Trk system potassium uptake protein trkA	TP4479_10125, ,psos,Trk system potassium uptake protein trkA	TP8_06155, ,psos,Trk system potassium uptake protein trkA	TP_2849_01180, ,psos,Trk system potassium uptake protein trkA	UFV1_02355, ,psos,Trk system potassium uptake protein trkA,IDENTICAL PARALOGS:,UFV1_03250,Trk system potassium uptake protein trkA	jx18_02650, ,psos,Trk system potassium uptake protein trkA
185	TP6375_00965, ,psos,Trk system potassium uptake protein TrkA	2012CQ_ZSH_08680, ,psos,Trk system potassium uptake protein TrkA	Arash114_00960, ,psos,Trk system potassium uptake protein TrkA	Bu5_04855, ,psos,Trk system potassium uptake protein TrkA	DSM_20630_03250, ,psos,Trk system potassium uptake protein TrkA	MS249_06465, ,psos,Trk system potassium uptake protein TrkA	NCTC5224_05645, ,psos,Trk system potassium uptake protein TrkA	SH01_10550, ,psos,Trk system potassium uptake protein TrkA	SH02_06430, ,psos,Trk system potassium uptake protein TrkA	SH03_00960, ,psos,Trk system potassium uptake protein TrkA	TP1_02915, ,psos,Trk system potassium uptake protein TrkA	TP2_08890, ,psos,Trk system potassium uptake protein TrkA	TP3_03785, ,psos,Trk system potassium uptake protein TrkA	TP4_00865, ,psos,Trk system potassium uptake protein TrkA	TP4479_10130, ,psos,Trk system potassium uptake protein TrkA	TP8_06160, ,psos,Trk system potassium uptake protein TrkA	TP_2849_01185, ,psos,Trk system potassium uptake protein TrkA	UFV1_02360, ,psos,Trk system potassium uptake protein TrkA,IDENTICAL PARALOGS:,UFV1_03255,Trk system potassium uptake protein TrkA	jx18_02645, ,psos,Trk system potassium uptake protein TrkA
186	TP6375_00970, ,psos,Protein of uncharacterized function (DUF3159)	2012CQ_ZSH_08685, ,psos,Protein of uncharacterized function (DUF3159)	Arash114_00965, ,psos,Protein of uncharacterized function (DUF3159)	Bu5_04850, ,psos,Protein of uncharacterized function (DUF3159)	DSM_20630_03255, ,psos,Protein of uncharacterized function (DUF3159)	MS249_06470, ,psos,Protein of uncharacterized function (DUF3159)	NCTC5224_05650, ,psos,Protein of uncharacterized function (DUF3159)	SH01_10545, ,psos,Protein of uncharacterized function (DUF3159)	SH02_06435, ,psos,Protein of uncharacterized function (DUF3159)	SH03_00965, ,psos,Protein of uncharacterized function (DUF3159)	TP1_02910, ,psos,Protein of uncharacterized function (DUF3159)	TP2_08885, ,psos,Protein of uncharacterized function (DUF3159)	TP3_03790, ,psos,Protein of uncharacterized function (DUF3159)	TP4_00860, ,psos,Protein of uncharacterized function (DUF3159)	TP4479_10135, ,psos,Protein of uncharacterized function (DUF3159)	TP8_06165, ,psos,Protein of uncharacterized function (DUF3159)	TP_2849_01190, ,psos,Protein of uncharacterized function (DUF3159)	UFV1_02365, ,psos,Protein of uncharacterized function (DUF3159),IDENTICAL PARALOGS:,UFV1_03260,Protein of uncharacterized function (DUF3159)	jx18_02640, ,psos,Protein of uncharacterized function (DUF3159)
187	TP6375_00975, ,psos,hypothetical protein	2012CQ_ZSH_08690, ,psos,hypothetical protein	Arash114_00970, ,psos,hypothetical protein	Bu5_04845, ,psos,hypothetical protein	DSM_20630_03260, ,psos,hypothetical protein	MS249_06475, ,psos,hypothetical protein	NCTC5224_05655, ,psos,hypothetical protein	SH01_10540, ,psos,hypothetical protein	SH02_06440, ,psos,hypothetical protein	SH03_00970, ,psos,hypothetical protein	TP1_02905, ,psos,hypothetical protein	TP2_08880, ,psos,hypothetical protein	TP3_03795, ,psos,hypothetical protein	TP4_00855, ,psos,hypothetical protein	TP4479_10140, ,psos,hypothetical protein	TP8_06170, ,psos,hypothetical protein	TP_2849_01195, ,psos,hypothetical protein	UFV1_02370, ,psos,hypothetical protein,IDENTICAL PARALOGS:,UFV1_03265,hypothetical protein	jx18_02635, ,psos,hypothetical protein
188	TP6375_00980, ,psos,DUF3710 domain-containing protein	2012CQ_ZSH_08695, ,psos,DUF3710 domain-containing protein	Arash114_00975, ,psos,DUF3710 domain-containing protein	Bu5_04840, ,psos,DUF3710 domain-containing protein	DSM_20630_03265, ,psos,DUF3710 domain-containing protein	MS249_06480, ,psos,DUF3710 domain-containing protein	NCTC5224_05660, ,psos,DUF3710 domain-containing protein	SH01_10535, ,psos,DUF3710 domain-containing protein	SH02_06445, ,psos,DUF3710 domain-containing protein	SH03_00975, ,psos,DUF3710 domain-containing protein	TP1_02900, ,psos,DUF3710 domain-containing protein	TP2_08875, ,psos,DUF3710 domain-containing protein	TP3_03800, ,psos,DUF3710 domain-containing protein	TP4_00850, ,psos,DUF3710 domain-containing protein	TP4479_10145, ,psos,DUF3710 domain-containing protein	TP8_06175, ,psos,DUF3710 domain-containing protein	TP_2849_01200, ,psos,DUF3710 domain-containing protein	UFV1_02375, ,psos,DUF3710 domain-containing protein,IDENTICAL PARALOGS:,UFV1_03270,DUF3710 domain-containing protein	jx18_02630, ,psos,DUF3710 domain-containing protein
189	TP6375_00985, ,psos,DUF4193 domain-containing protein	2012CQ_ZSH_08700, ,psos,DUF4193 domain-containing protein	Arash114_00980, ,psos,DUF4193 domain-containing protein	Bu5_04835, ,psos,DUF4193 domain-containing protein	DSM_20630_03270, ,psos,DUF4193 domain-containing protein	MS249_06485, ,psos,DUF4193 domain-containing protein	NCTC5224_05665, ,psos,DUF4193 domain-containing protein	SH01_10530, ,psos,DUF4193 domain-containing protein	SH02_06450, ,psos,DUF4193 domain-containing protein	SH03_00980, ,psos,DUF4193 domain-containing protein	TP1_02895, ,psos,DUF4193 domain-containing protein	TP2_08870, ,psos,DUF4193 domain-containing protein	TP3_03805, ,psos,DUF4193 domain-containing protein	TP4_00845, ,psos,DUF4193 domain-containing protein	TP4479_10150, ,psos,DUF4193 domain-containing protein	TP8_06180, ,psos,DUF4193 domain-containing protein	TP_2849_01205, ,psos,DUF4193 domain-containing protein	UFV1_02380, ,psos,DUF4193 domain-containing protein,IDENTICAL PARALOGS:,UFV1_03275,DUF4193 domain-containing protein	jx18_02625, ,psos,DUF4193 domain-containing protein
190	TP6375_00990, ,psos,DUF3071 domain-containing protein	2012CQ_ZSH_08705, ,psos,DUF3071 domain-containing protein	Arash114_00985, ,psos,DUF3071 domain-containing protein	Bu5_04830, ,psos,DUF3071 domain-containing protein	DSM_20630_03275, ,psos,DUF3071 domain-containing protein	MS249_06490, ,psos,DUF3071 domain-containing protein	NCTC5224_05670, ,psos,DUF3071 domain-containing protein	SH01_10525, ,psos,DUF3071 domain-containing protein	SH02_06455, ,psos,DUF3071 domain-containing protein	SH03_00985, ,psos,DUF3071 domain-containing protein	TP1_02890, ,psos,DUF3071 domain-containing protein	TP2_08865, ,psos,DUF3071 domain-containing protein	TP3_03810, ,psos,DUF3071 domain-containing protein	TP4_00840, ,psos,DUF3071 domain-containing protein	TP4479_10155, ,psos,DUF3071 domain-containing protein	TP8_06185, ,psos,DUF3071 domain-containing protein	TP_2849_01210, ,psos,DUF3071 domain-containing protein	UFV1_02385, ,psos,DUF3071 domain-containing protein,IDENTICAL PARALOGS:,UFV1_03280,DUF3071 domain-containing protein	jx18_02620, ,psos,DUF3071 domain-containing protein
191	TP6375_00995, ,psos,Phosphodiesterase	2012CQ_ZSH_08710, ,psos,Phosphodiesterase	Arash114_00990, ,psos,Phosphodiesterase	Bu5_04825, ,psos,Phosphodiesterase	DSM_20630_03280, ,psos,Phosphodiesterase	MS249_06495, ,psos,Phosphodiesterase	NCTC5224_05675, ,psos,Phosphodiesterase	SH01_10520, ,psos,Phosphodiesterase	SH02_06460, ,psos,Phosphodiesterase	SH03_00990, ,psos,Phosphodiesterase	TP1_02885, ,psos,Phosphodiesterase	TP2_08860, ,psos,Phosphodiesterase	TP3_03815, ,psos,Phosphodiesterase	TP4_00835, ,psos,Phosphodiesterase	TP4479_10160, ,psos,Phosphodiesterase	TP8_06190, ,psos,Phosphodiesterase	TP_2849_01215, ,psos,Phosphodiesterase	UFV1_02390, ,psos,Phosphodiesterase,IDENTICAL PARALOGS:,UFV1_03285,Phosphodiesterase	jx18_02615, ,psos,Phosphodiesterase
192	TP6375_01000, ,psos,Family of unknown function (DUF5998)	2012CQ_ZSH_08715, ,psos,Family of unknown function (DUF5998)	Arash114_00995, ,psos,Family of unknown function (DUF5998)	Bu5_04820, ,psos,Family of unknown function (DUF5998)	DSM_20630_03285, ,psos,Family of unknown function (DUF5998)	MS249_06500, ,psos,Family of unknown function (DUF5998)	NCTC5224_05680, ,psos,Family of unknown function (DUF5998)	SH01_10515, ,psos,Family of unknown function (DUF5998)	SH02_06465, ,psos,Family of unknown function (DUF5998)	SH03_00995, ,psos,Family of unknown function (DUF5998)	TP1_02880, ,psos,Family of unknown function (DUF5998)	TP2_08855, ,psos,Family of unknown function (DUF5998)	TP3_03820, ,psos,Family of unknown function (DUF5998)	TP4_00830, ,psos,Family of unknown function (DUF5998)	TP4479_10165, ,psos,Family of unknown function (DUF5998)	TP8_06195, ,psos,Family of unknown function (DUF5998)	TP_2849_01220, ,psos,Family of unknown function (DUF5998)	UFV1_02395, ,psos,Family of unknown function (DUF5998),IDENTICAL PARALOGS:,UFV1_03290,Family of unknown function (DUF5998)	jx18_02610, ,psos,Family of unknown function (DUF5998)
193	TP6375_01005, ,psos,DNA topoisomerase (ATP-hydrolyzing)	2012CQ_ZSH_08720, ,psos,DNA topoisomerase (ATP-hydrolyzing)	Arash114_01000, ,psos,DNA topoisomerase (ATP-hydrolyzing)	Bu5_04815, ,psos,DNA topoisomerase (ATP-hydrolyzing)	DSM_20630_03290, ,psos,DNA topoisomerase (ATP-hydrolyzing)	MS249_06505, ,psos,DNA topoisomerase (ATP-hydrolyzing)	NCTC5224_05685, ,psos,DNA topoisomerase (ATP-hydrolyzing)	SH01_10510, ,psos,DNA topoisomerase (ATP-hydrolyzing)	SH02_06470, ,psos,DNA topoisomerase (ATP-hydrolyzing)	SH03_01000, ,psos,DNA topoisomerase (ATP-hydrolyzing)	TP1_02875, ,psos,DNA topoisomerase (ATP-hydrolyzing)	TP2_08850, ,psos,DNA topoisomerase (ATP-hydrolyzing)	TP3_03825, ,psos,DNA topoisomerase (ATP-hydrolyzing)	TP4_00825, ,psos,DNA topoisomerase (ATP-hydrolyzing)	TP4479_10170, ,psos,DNA topoisomerase (ATP-hydrolyzing)	TP8_06200, ,psos,DNA topoisomerase (ATP-hydrolyzing)	TP_2849_01225, ,psos,DNA topoisomerase (ATP-hydrolyzing)	UFV1_02400, ,psos,DNA topoisomerase (ATP-hydrolyzing),IDENTICAL PARALOGS:,UFV1_03295,DNA topoisomerase (ATP-hydrolyzing)	jx18_02605, ,psos,DNA topoisomerase (ATP-hydrolyzing)
194	TP6375_01010, ,psos,GNAT family N-acetyltransferase	2012CQ_ZSH_08725, ,psos,GNAT family N-acetyltransferase	Arash114_01005, ,psos,GNAT family N-acetyltransferase	Bu5_04810, ,psos,GNAT family N-acetyltransferase	DSM_20630_03295, ,psos,GNAT family N-acetyltransferase	MS249_06510, ,psos,GNAT family N-acetyltransferase	NCTC5224_05690, ,psos,GNAT family N-acetyltransferase	SH01_10505, ,psos,GNAT family N-acetyltransferase	SH02_06475, ,psos,GNAT family N-acetyltransferase	SH03_01005, ,psos,GNAT family N-acetyltransferase	TP1_02870, ,psos,GNAT family N-acetyltransferase	TP2_08845, ,psos,GNAT family N-acetyltransferase	TP3_03830, ,psos,GNAT family N-acetyltransferase	TP4_00820, ,psos,GNAT family N-acetyltransferase	TP4479_10175, ,psos,GNAT family N-acetyltransferase	TP8_06205, ,psos,GNAT family N-acetyltransferase	TP_2849_01230, ,psos,GNAT family N-acetyltransferase	UFV1_02405, ,psos,GNAT family N-acetyltransferase,IDENTICAL PARALOGS:,UFV1_03300,GNAT family N-acetyltransferase	jx18_02600, ,psos,GNAT family N-acetyltransferase
195	TP6375_01015, ,psos,GNAT family N-acetyltransferase	2012CQ_ZSH_08730, ,psos,GNAT family N-acetyltransferase	Arash114_01010, ,psos,GNAT family N-acetyltransferase	Bu5_04805, ,psos,GNAT family N-acetyltransferase	DSM_20630_03300, ,psos,GNAT family N-acetyltransferase	MS249_06515, ,psos,GNAT family N-acetyltransferase	NCTC5224_05695, ,psos,GNAT family N-acetyltransferase	SH01_10500, ,psos,GNAT family N-acetyltransferase	SH02_06480, ,psos,GNAT family N-acetyltransferase	SH03_01010, ,psos,GNAT family N-acetyltransferase	TP1_02865, ,psos,GNAT family N-acetyltransferase	TP2_08840, ,psos,GNAT family N-acetyltransferase	TP3_03835, ,psos,GNAT family N-acetyltransferase	TP4_00815, ,psos,GNAT family N-acetyltransferase	TP4479_10180, ,psos,GNAT family N-acetyltransferase	TP8_06210, ,psos,GNAT family N-acetyltransferase	TP_2849_01235, ,psos,GNAT family N-acetyltransferase	UFV1_02410, ,psos,GNAT family N-acetyltransferase,IDENTICAL PARALOGS:,UFV1_03305,GNAT family N-acetyltransferase	jx18_02595, ,psos,GNAT family N-acetyltransferase
196	TP6375_01020, ,psos,DNA topoisomerase (ATP-hydrolyzing)	2012CQ_ZSH_08735, ,psos,DNA topoisomerase (ATP-hydrolyzing)	Arash114_01015, ,psos,DNA topoisomerase (ATP-hydrolyzing)	Bu5_04800, ,psos,DNA topoisomerase (ATP-hydrolyzing)	DSM_20630_03305, ,psos,DNA topoisomerase (ATP-hydrolyzing)	MS249_06520, ,psos,DNA topoisomerase (ATP-hydrolyzing)	NCTC5224_05700, ,psos,DNA topoisomerase (ATP-hydrolyzing)	SH01_10495, ,psos,DNA topoisomerase (ATP-hydrolyzing)	SH02_06485, ,psos,DNA topoisomerase (ATP-hydrolyzing)	SH03_01015, ,psos,DNA topoisomerase (ATP-hydrolyzing)	TP1_02860, ,psos,DNA topoisomerase (ATP-hydrolyzing)	TP2_08835, ,psos,DNA topoisomerase (ATP-hydrolyzing)	TP3_03840, ,psos,DNA topoisomerase (ATP-hydrolyzing)	TP4_00810, ,psos,DNA topoisomerase (ATP-hydrolyzing)	TP4479_10185, ,psos,DNA topoisomerase (ATP-hydrolyzing)	TP8_06215, ,psos,DNA topoisomerase (ATP-hydrolyzing)	TP_2849_01240, ,psos,DNA topoisomerase (ATP-hydrolyzing)	UFV1_02415, ,psos,DNA topoisomerase (ATP-hydrolyzing),IDENTICAL PARALOGS:,UFV1_03310,DNA topoisomerase (ATP-hydrolyzing)	jx18_02590, ,psos,DNA topoisomerase (ATP-hydrolyzing)
197	TP6375_01025, ,psos,3-5 exonuclease	2012CQ_ZSH_08740, ,psos,DNA polymerase III polC-type	Arash114_01020, ,psos,DNA polymerase III polC-type	Bu5_04795, ,psos,DNA polymerase III polC-type	DSM_20630_03310, ,psos,DNA polymerase III polC-type	MS249_06525, ,psos,DNA polymerase III polC-type	NCTC5224_05705, ,psos,DNA polymerase III polC-type	SH01_10490, ,psos,DNA polymerase III polC-type	SH02_06490, ,psos,DNA polymerase III polC-type	SH03_01020, ,psos,3-5 exonuclease	TP1_02855, ,psos,3-5 exonuclease	TP2_08830, ,psos,DNA polymerase III polC-type	TP3_03845, ,psos,DNA polymerase III polC-type	TP4_00805, ,psos,DNA polymerase III polC-type	TP4479_10190, ,psos,DNA polymerase III polC-type	TP8_06220, ,psos,DNA polymerase III polC-type	TP_2849_01245, ,psos,DNA polymerase III polC-type	UFV1_02420, ,psos,3-5 exonuclease,IDENTICAL PARALOGS:,UFV1_03315,3'-5' exonuclease	jx18_02585, ,psos,DNA polymerase III polC-type
198	TP6375_01030, ,psos,RNA polymerase sigma factor SigA	2012CQ_ZSH_08745, ,psos,RNA polymerase sigma factor SigA	Arash114_01025, ,psos,RNA polymerase sigma factor SigA	Bu5_04790, ,psos,RNA polymerase sigma factor SigA	DSM_20630_03315, ,psos,RNA polymerase sigma factor SigA	MS249_06530, ,psos,RNA polymerase sigma factor SigA	NCTC5224_05710, ,psos,RNA polymerase sigma factor SigA	SH01_10485, ,psos,RNA polymerase sigma factor SigA	SH02_06495, ,psos,RNA polymerase sigma factor SigA	SH03_01025, ,psos,RNA polymerase sigma factor SigA	TP1_02850, ,psos,RNA polymerase sigma factor SigA	TP2_08825, ,psos,RNA polymerase sigma factor SigA	TP3_03850, ,psos,RNA polymerase sigma factor SigA	TP4_00800, ,psos,RNA polymerase sigma factor SigA	TP4479_10195, ,psos,RNA polymerase sigma factor SigA	TP8_06225, ,psos,RNA polymerase sigma factor SigA	TP_2849_01250, ,psos,RNA polymerase sigma factor SigA	UFV1_02425, ,psos,RNA polymerase sigma factor SigA,IDENTICAL PARALOGS:,UFV1_03320,RNA polymerase sigma factor SigA	jx18_02580, ,psos,RNA polymerase sigma factor SigA
199	TP6375_01035, ,psos,Universal stress protein	2012CQ_ZSH_08750, ,psos,Universal stress protein	Arash114_01030, ,psos,Universal stress protein	Bu5_04785, ,psos,Universal stress protein	DSM_20630_03320, ,psos,Universal stress protein	MS249_06535, ,psos,Universal stress protein	NCTC5224_05715, ,psos,Universal stress protein	SH01_10480, ,psos,Universal stress protein	SH02_06500, ,psos,Universal stress protein	SH03_01030, ,psos,Universal stress protein	TP1_02845, ,psos,Universal stress protein	TP2_08820, ,psos,Universal stress protein	TP3_03855, ,psos,Universal stress protein	TP4_00795, ,psos,Universal stress protein	TP4479_10200, ,psos,Universal stress protein	TP8_06230, ,psos,Universal stress protein	TP_2849_01255, ,psos,Universal stress protein	UFV1_02430, ,psos,Universal stress protein,IDENTICAL PARALOGS:,UFV1_03325,Universal stress protein	jx18_02575, ,psos,Universal stress protein
200	TP6375_01040, ,psos,DUF4192 domain-containing protein	2012CQ_ZSH_08755, ,psos,DUF4192 domain-containing protein	Arash114_01035, ,psos,DUF4192 domain-containing protein	Bu5_04780, ,psos,DUF4192 domain-containing protein	DSM_20630_03325, ,psos,DUF4192 domain-containing protein	MS249_06540, ,psos,DUF4192 domain-containing protein	NCTC5224_05720, ,psos,DUF4192 domain-containing protein	SH01_10475, ,psos,DUF4192 domain-containing protein	SH02_06505, ,psos,DUF4192 domain-containing protein	SH03_01035, ,psos,DUF4192 domain-containing protein	TP1_02840, ,psos,DUF4192 domain-containing protein	TP2_08815, ,psos,DUF4192 domain-containing protein	TP3_03860, ,psos,DUF4192 domain-containing protein	TP4_00790, ,psos,DUF4192 domain-containing protein	TP4479_10205, ,psos,DUF4192 domain-containing protein	TP8_06235, ,psos,DUF4192 domain-containing protein	TP_2849_01260, ,psos,DUF4192 domain-containing protein	UFV1_02435, ,psos,DUF4192 domain-containing protein,IDENTICAL PARALOGS:,UFV1_03330,DUF4192 domain-containing protein	jx18_02570, ,psos,DUF4192 domain-containing protein
201	TP6375_01045, ,psos,Octaprenyl-diphosphate synthase	2012CQ_ZSH_08760, ,psos,Octaprenyl-diphosphate synthase	Arash114_01040, ,psos,Octaprenyl-diphosphate synthase	Bu5_04775, ,psos,Octaprenyl-diphosphate synthase	DSM_20630_03330, ,psos,Octaprenyl-diphosphate synthase	MS249_06545, ,psos,Octaprenyl-diphosphate synthase	NCTC5224_05725, ,psos,Octaprenyl-diphosphate synthase	SH01_10470, ,psos,Octaprenyl-diphosphate synthase	SH02_06510, ,psos,Octaprenyl-diphosphate synthase	SH03_01040, ,psos,Octaprenyl-diphosphate synthase	TP1_02835, ,psos,Octaprenyl-diphosphate synthase	TP2_08810, ,psos,Octaprenyl-diphosphate synthase	TP3_03865, ,psos,Octaprenyl-diphosphate synthase	TP4_00785, ,psos,Octaprenyl-diphosphate synthase	TP4479_10210, ,psos,Octaprenyl-diphosphate synthase	TP8_06240, ,psos,Octaprenyl-diphosphate synthase	TP_2849_01265, ,psos,Octaprenyl-diphosphate synthase	UFV1_02440, ,psos,Octaprenyl-diphosphate synthase,IDENTICAL PARALOGS:,UFV1_03335,Octaprenyl-diphosphate synthase	jx18_02565, ,psos,Octaprenyl-diphosphate synthase
202	TP6375_01050, ,psos,Rv2175c_C domain-containing protein	2012CQ_ZSH_08765, ,psos,Rv2175c_C domain-containing protein	Arash114_01045, ,psos,Rv2175c_C domain-containing protein	Bu5_04770, ,psos,Rv2175c_C domain-containing protein	DSM_20630_03335, ,psos,Rv2175c_C domain-containing protein	MS249_06550, ,psos,Rv2175c_C domain-containing protein	NCTC5224_05730, ,psos,Rv2175c_C domain-containing protein	SH01_10465, ,psos,Rv2175c_C domain-containing protein	SH02_06515, ,psos,Rv2175c_C domain-containing protein	SH03_01045, ,psos,Rv2175c_C domain-containing protein	TP1_02830, ,psos,Rv2175c_C domain-containing protein	TP2_08805, ,psos,Rv2175c_C domain-containing protein	TP3_03870, ,psos,Rv2175c_C domain-containing protein	TP4_00780, ,psos,Rv2175c_C domain-containing protein	TP4479_10215, ,psos,Rv2175c_C domain-containing protein	TP8_06245, ,psos,Rv2175c_C domain-containing protein	TP_2849_01270, ,psos,Rv2175c_C domain-containing protein	UFV1_02445, ,psos,Rv2175c_C domain-containing protein,IDENTICAL PARALOGS:,UFV1_03340,Rv2175c_C domain-containing protein	jx18_02560, ,psos,Rv2175c_C domain-containing protein
203	TP6375_01055, ,psos,D-gamma-glutamyl-meso-diaminopimelic acid endopeptidase CwlS	2012CQ_ZSH_08770, ,psos,D-gamma-glutamyl-meso-diaminopimelic acid endopeptidase CwlS	Arash114_01055, ,psos,D-gamma-glutamyl-meso-diaminopimelic acid endopeptidase CwlS	Bu5_04765, ,psos,D-gamma-glutamyl-meso-diaminopimelic acid endopeptidase CwlS	DSM_20630_03340, ,psos,D-gamma-glutamyl-meso-diaminopimelic acid endopeptidase CwlS	MS249_06555, ,psos,D-gamma-glutamyl-meso-diaminopimelic acid endopeptidase CwlS	NCTC5224_05735, ,psos,D-gamma-glutamyl-meso-diaminopimelic acid endopeptidase CwlS	SH01_10460, ,psos,D-gamma-glutamyl-meso-diaminopimelic acid endopeptidase CwlS	SH02_06520, ,psos,D-gamma-glutamyl-meso-diaminopimelic acid endopeptidase CwlS	SH03_01050, ,psos,D-gamma-glutamyl-meso-diaminopimelic acid endopeptidase CwlS	TP1_02825, ,psos,D-gamma-glutamyl-meso-diaminopimelic acid endopeptidase CwlS	TP2_08800, ,psos,D-gamma-glutamyl-meso-diaminopimelic acid endopeptidase CwlS	TP3_03875, ,psos,D-gamma-glutamyl-meso-diaminopimelic acid endopeptidase CwlS	TP4_00775, ,psos,D-gamma-glutamyl-meso-diaminopimelic acid endopeptidase CwlS	TP4479_10220, ,psos,D-gamma-glutamyl-meso-diaminopimelic acid endopeptidase CwlS	TP8_06250, ,psos,D-gamma-glutamyl-meso-diaminopimelic acid endopeptidase CwlS	TP_2849_01275, ,psos,D-gamma-glutamyl-meso-diaminopimelic acid endopeptidase CwlS	UFV1_02450, ,psos,D-gamma-glutamyl-meso-diaminopimelic acid endopeptidase CwlS,IDENTICAL PARALOGS:,UFV1_03345,D-gamma-glutamyl-meso-diaminopimelic acid endopeptidase CwlS	jx18_02555, ,psos,D-gamma-glutamyl-meso-diaminopimelic acid endopeptidase CwlS
204	TP6375_01060, ,psos,Non-specific serine/threonine protein kinase	2012CQ_ZSH_08775, ,psos,Non-specific serine/threonine protein kinase	Arash114_01060, ,psos,Non-specific serine/threonine protein kinase	Bu5_04760, ,psos,Non-specific serine/threonine protein kinase	DSM_20630_03345, ,psos,Non-specific serine/threonine protein kinase	MS249_06560, ,psos,Non-specific serine/threonine protein kinase	NCTC5224_05740, ,psos,Non-specific serine/threonine protein kinase	SH01_10455, ,psos,Non-specific serine/threonine protein kinase	SH02_06525, ,psos,Non-specific serine/threonine protein kinase	SH03_01055, ,psos,Non-specific serine/threonine protein kinase	TP1_02820, ,psos,Non-specific serine/threonine protein kinase	TP2_08795, ,psos,Non-specific serine/threonine protein kinase	TP3_03880, ,psos,Non-specific serine/threonine protein kinase	TP4_00770, ,psos,Non-specific serine/threonine protein kinase	TP4479_10225, ,psos,Non-specific serine/threonine protein kinase	TP8_06255, ,psos,Non-specific serine/threonine protein kinase	TP_2849_01280, ,psos,Non-specific serine/threonine protein kinase	UFV1_02455, ,psos,Non-specific serine/threonine protein kinase,IDENTICAL PARALOGS:,UFV1_03350,Non-specific serine/threonine protein kinase	jx18_02550, ,psos,Non-specific serine/threonine protein kinase
205	TP6375_01065, ,psos,Phospho-2-dehydro-3-deoxyheptonate aldolase	2012CQ_ZSH_08780, ,psos,Phospho-2-dehydro-3-deoxyheptonate aldolase	Arash114_01065, ,psos,Phospho-2-dehydro-3-deoxyheptonate aldolase	Bu5_04755, ,psos,Phospho-2-dehydro-3-deoxyheptonate aldolase	DSM_20630_03350, ,psos,Phospho-2-dehydro-3-deoxyheptonate aldolase	MS249_06565, ,psos,Phospho-2-dehydro-3-deoxyheptonate aldolase	NCTC5224_05745, ,psos,Phospho-2-dehydro-3-deoxyheptonate aldolase	SH01_10450, ,psos,Phospho-2-dehydro-3-deoxyheptonate aldolase	SH02_06530, ,psos,Phospho-2-dehydro-3-deoxyheptonate aldolase	SH03_01060, ,psos,Phospho-2-dehydro-3-deoxyheptonate aldolase	TP1_02815, ,psos,Phospho-2-dehydro-3-deoxyheptonate aldolase	TP2_08790, ,psos,Phospho-2-dehydro-3-deoxyheptonate aldolase	TP3_03885, ,psos,Phospho-2-dehydro-3-deoxyheptonate aldolase	TP4_00765, ,psos,Phospho-2-dehydro-3-deoxyheptonate aldolase	TP4479_10230, ,psos,Phospho-2-dehydro-3-deoxyheptonate aldolase	TP8_06260, ,psos,Phospho-2-dehydro-3-deoxyheptonate aldolase	TP_2849_01285, ,psos,Phospho-2-dehydro-3-deoxyheptonate aldolase	UFV1_02460, ,psos,Phospho-2-dehydro-3-deoxyheptonate aldolase,IDENTICAL PARALOGS:,UFV1_03355,Phospho-2-dehydro-3-deoxyheptonate aldolase	jx18_02545, ,psos,Phospho-2-dehydro-3-deoxyheptonate aldolase
206	TP6375_01070, ,psos,Pyrophosphate--fructose 6-phosphate 1-phosphotransferase	2012CQ_ZSH_08785, ,psos,Pyrophosphate--fructose 6-phosphate 1-phosphotransferase	Arash114_01070, ,psos,Pyrophosphate--fructose 6-phosphate 1-phosphotransferase	Bu5_04750, ,psos,Pyrophosphate--fructose 6-phosphate 1-phosphotransferase	DSM_20630_03355, ,psos,Pyrophosphate--fructose 6-phosphate 1-phosphotransferase	MS249_06570, ,psos,Pyrophosphate--fructose 6-phosphate 1-phosphotransferase	NCTC5224_05750, ,psos,Pyrophosphate--fructose 6-phosphate 1-phosphotransferase	SH01_10445, ,psos,Pyrophosphate--fructose 6-phosphate 1-phosphotransferase	SH02_06535, ,psos,Pyrophosphate--fructose 6-phosphate 1-phosphotransferase	SH03_01065, ,psos,Pyrophosphate--fructose 6-phosphate 1-phosphotransferase	TP1_02810, ,psos,Pyrophosphate--fructose 6-phosphate 1-phosphotransferase	TP2_08785, ,psos,Pyrophosphate--fructose 6-phosphate 1-phosphotransferase	TP3_03890, ,psos,Pyrophosphate--fructose 6-phosphate 1-phosphotransferase	TP4_00760, ,psos,Pyrophosphate--fructose 6-phosphate 1-phosphotransferase	TP4479_10235, ,psos,Pyrophosphate--fructose 6-phosphate 1-phosphotransferase	TP8_06265, ,psos,Pyrophosphate--fructose 6-phosphate 1-phosphotransferase	TP_2849_01290, ,psos,Pyrophosphate--fructose 6-phosphate 1-phosphotransferase	UFV1_02465, ,psos,Pyrophosphate--fructose 6-phosphate 1-phosphotransferase,IDENTICAL PARALOGS:,UFV1_03360,Pyrophosphate--fructose 6-phosphate 1-phosphotransferase	jx18_02540, ,psos,Pyrophosphate--fructose 6-phosphate 1-phosphotransferase
207	TP6375_01075, ,psos,hypothetical protein	2012CQ_ZSH_08790, ,psos,hypothetical protein	Arash114_01075, ,psos,hypothetical protein	Bu5_04745, ,psos,hypothetical protein	DSM_20630_03360, ,psos,hypothetical protein	MS249_06575, ,psos,hypothetical protein	NCTC5224_05755, ,psos,hypothetical protein	SH01_10440, ,psos,hypothetical protein	SH02_06540, ,psos,hypothetical protein	SH03_01070, ,psos,hypothetical protein	TP1_02805, ,psos,hypothetical protein	TP2_08780, ,psos,hypothetical protein	TP3_03895, ,psos,hypothetical protein	TP4_00755, ,psos,hypothetical protein	TP4479_10240, ,psos,hypothetical protein	TP8_06270, ,psos,hypothetical protein	TP_2849_01295, ,psos,hypothetical protein	UFV1_02470, ,psos,hypothetical protein,IDENTICAL PARALOGS:,UFV1_03365,hypothetical protein	jx18_02535, ,psos,hypothetical protein
208	TP6375_01080, ,psos,DNA polymerase III polC-type	2012CQ_ZSH_08795, ,psos,DNA polymerase III polC-type	Arash114_01080, ,psos,DNA polymerase III polC-type	Bu5_04740, ,psos,DNA polymerase III polC-type	DSM_20630_03365, ,psos,DNA polymerase III polC-type	MS249_06580, ,psos,DNA polymerase III polC-type	NCTC5224_05760, ,psos,DNA polymerase III polC-type	SH01_10435, ,psos,DNA polymerase III polC-type	SH02_06545, ,psos,DNA polymerase III polC-type	SH03_01075, ,psos,DNA polymerase III polC-type	TP1_02800, ,psos,DNA polymerase III polC-type	TP2_08775, ,psos,DNA polymerase III polC-type	TP3_03900, ,psos,DNA polymerase III polC-type	TP4_00750, ,psos,DNA polymerase III polC-type	TP4479_10245, ,psos,DNA polymerase III polC-type	TP8_06275, ,psos,DNA polymerase III polC-type	TP_2849_01300, ,psos,DNA polymerase III polC-type	UFV1_02475, ,psos,DNA polymerase III polC-type,IDENTICAL PARALOGS:,UFV1_03370,DNA polymerase III polC-type	jx18_02530, ,psos,DNA polymerase III polC-type
209	TP6375_01085, ,psos,Two-component system response regulator	2012CQ_ZSH_08800, ,psos,Two-component system response regulator	Arash114_01085, ,psos,Two-component system response regulator	Bu5_04735, ,psos,Two-component system response regulator	DSM_20630_03370, ,psos,Two-component system response regulator	MS249_06585, ,psos,Two-component system response regulator	NCTC5224_05765, ,psos,Two-component system response regulator	SH01_10430, ,psos,Two-component system response regulator	SH02_06550, ,psos,Two-component system response regulator	SH03_01080, ,psos,Two-component system response regulator	TP1_02795, ,psos,Two-component system response regulator	TP2_08770, ,psos,Two-component system response regulator	TP3_03905, ,psos,Two-component system response regulator	TP4_00745, ,psos,Two-component system response regulator	TP4479_10250, ,psos,Two-component system response regulator	TP8_06280, ,psos,Two-component system response regulator	TP_2849_01305, ,psos,Two-component system response regulator	UFV1_02480, ,psos,Two-component system response regulator,IDENTICAL PARALOGS:,UFV1_03375,Two-component system response regulator	jx18_02525, ,psos,Two-component system response regulator
210	TP6375_01090, ,psos,Superoxide dismutase	2012CQ_ZSH_08805, ,psos,Superoxide dismutase	Arash114_01090, ,psos,Superoxide dismutase	Bu5_04730, ,psos,Superoxide dismutase	DSM_20630_03375, ,psos,Superoxide dismutase	MS249_06590, ,psos,Superoxide dismutase	NCTC5224_05770, ,psos,Superoxide dismutase	SH01_10425, ,psos,Superoxide dismutase	SH02_06555, ,psos,Superoxide dismutase	SH03_01085, ,psos,Superoxide dismutase	TP1_02790, ,psos,Superoxide dismutase	TP2_08765, ,psos,Superoxide dismutase	TP3_03910, ,psos,Superoxide dismutase	TP4_00740, ,psos,Superoxide dismutase	TP4479_10255, ,psos,Superoxide dismutase	TP8_06285, ,psos,Superoxide dismutase	TP_2849_01310, ,psos,Superoxide dismutase	UFV1_02485, ,psos,Superoxide dismutase,IDENTICAL PARALOGS:,UFV1_03380,Superoxide dismutase	jx18_02520, ,psos,Superoxide dismutase
211	TP6375_01095, ,psos,Peptidylprolyl isomerase	2012CQ_ZSH_08810, ,psos,Peptidylprolyl isomerase	Arash114_01095, ,psos,Peptidylprolyl isomerase	Bu5_04725, ,psos,Peptidylprolyl isomerase	DSM_20630_03380, ,psos,Peptidylprolyl isomerase	MS249_06595, ,psos,Peptidylprolyl isomerase	NCTC5224_05775, ,psos,Peptidylprolyl isomerase	SH01_10420, ,psos,Peptidylprolyl isomerase	SH02_06560, ,psos,Peptidylprolyl isomerase	SH03_01090, ,psos,Peptidylprolyl isomerase	TP1_02785, ,psos,Peptidylprolyl isomerase	TP2_08760, ,psos,Peptidylprolyl isomerase	TP3_03915, ,psos,Peptidylprolyl isomerase	TP4_00735, ,psos,Peptidylprolyl isomerase	TP4479_10260, ,psos,Peptidylprolyl isomerase	TP8_06290, ,psos,Peptidylprolyl isomerase	TP_2849_01315, ,psos,Peptidylprolyl isomerase	UFV1_02490, ,psos,Peptidylprolyl isomerase,IDENTICAL PARALOGS:,UFV1_03385,Peptidylprolyl isomerase	jx18_02515, ,psos,Peptidylprolyl isomerase
212	TP6375_01100, ,psos,Iron-sulfur cluster insertion protein ErpA	2012CQ_ZSH_08815, ,psos,Iron-sulfur cluster insertion protein ErpA	Arash114_01100, ,psos,Iron-sulfur cluster insertion protein ErpA	Bu5_04720, ,psos,Iron-sulfur cluster insertion protein ErpA	DSM_20630_03385, ,psos,Iron-sulfur cluster insertion protein ErpA	MS249_06600, ,psos,Iron-sulfur cluster insertion protein ErpA	NCTC5224_05780, ,psos,Iron-sulfur cluster insertion protein ErpA	SH01_10415, ,psos,Iron-sulfur cluster insertion protein ErpA	SH02_06565, ,psos,Iron-sulfur cluster insertion protein ErpA	SH03_01095, ,psos,Iron-sulfur cluster insertion protein ErpA	TP1_02780, ,psos,Iron-sulfur cluster insertion protein ErpA	TP2_08755, ,psos,Iron-sulfur cluster insertion protein ErpA	TP3_03920, ,psos,Iron-sulfur cluster insertion protein ErpA	TP4_00730, ,psos,Iron-sulfur cluster insertion protein ErpA	TP4479_10265, ,psos,Iron-sulfur cluster insertion protein ErpA	TP8_06295, ,psos,Iron-sulfur cluster insertion protein ErpA	TP_2849_01320, ,psos,Iron-sulfur cluster insertion protein ErpA	UFV1_02495, ,psos,Iron-sulfur cluster insertion protein ErpA,IDENTICAL PARALOGS:,UFV1_03390,Iron-sulfur cluster insertion protein ErpA	jx18_02510, ,psos,Iron-sulfur cluster insertion protein ErpA
213	TP6375_01105, ,psos,hypothetical protein	2012CQ_ZSH_08820, ,psos,hypothetical protein	Arash114_01105, ,psos,hypothetical protein	Bu5_04715, ,psos,hypothetical protein	DSM_20630_03390, ,psos,hypothetical protein	MS249_06605, ,psos,hypothetical protein	NCTC5224_05785, ,psos,hypothetical protein	SH01_10410, ,psos,hypothetical protein	SH02_06570, ,psos,hypothetical protein	SH03_01100, ,psos,hypothetical protein	TP1_02775, ,psos,hypothetical protein	TP2_08750, ,psos,hypothetical protein	TP3_03925, ,psos,hypothetical protein	TP4_00725, ,psos,hypothetical protein	TP4479_10270, ,psos,hypothetical protein	TP8_06300, ,psos,hypothetical protein	TP_2849_01325, ,psos,hypothetical protein	UFV1_02500, ,psos,hypothetical protein,IDENTICAL PARALOGS:,UFV1_03395,hypothetical protein	jx18_02505, ,psos,hypothetical protein
214	TP6375_01110, ,psos,Succinyl-diaminopimelate desuccinylase	2012CQ_ZSH_08825, ,psos,Succinyl-diaminopimelate desuccinylase	Arash114_01110, ,psos,Succinyl-diaminopimelate desuccinylase	Bu5_04710, ,psos,Succinyl-diaminopimelate desuccinylase	DSM_20630_03395, ,psos,Succinyl-diaminopimelate desuccinylase	MS249_06610, ,psos,Succinyl-diaminopimelate desuccinylase	NCTC5224_05790, ,psos,Succinyl-diaminopimelate desuccinylase	SH01_10405, ,psos,Succinyl-diaminopimelate desuccinylase	SH02_06575, ,psos,Succinyl-diaminopimelate desuccinylase	SH03_01105, ,psos,Succinyl-diaminopimelate desuccinylase	TP1_02770, ,psos,Succinyl-diaminopimelate desuccinylase	TP2_08745, ,psos,Succinyl-diaminopimelate desuccinylase	TP3_03930, ,psos,Succinyl-diaminopimelate desuccinylase	TP4_00720, ,psos,Succinyl-diaminopimelate desuccinylase	TP4479_10275, ,psos,Succinyl-diaminopimelate desuccinylase	TP8_06305, ,psos,Succinyl-diaminopimelate desuccinylase	TP_2849_01330, ,psos,Succinyl-diaminopimelate desuccinylase	UFV1_02505, ,psos,Succinyl-diaminopimelate desuccinylase,IDENTICAL PARALOGS:,UFV1_03400,Succinyl-diaminopimelate desuccinylase	jx18_02500, ,psos,Succinyl-diaminopimelate desuccinylase
215	TP6375_01115, ,psos,DUF3043 domain-containing protein	2012CQ_ZSH_08830, ,psos,DUF3043 domain-containing protein	Arash114_01115, ,psos,DUF3043 domain-containing protein	Bu5_04705, ,psos,DUF3043 domain-containing protein	DSM_20630_03400, ,psos,DUF3043 domain-containing protein	MS249_06615, ,psos,DUF3043 domain-containing protein	NCTC5224_05795, ,psos,DUF3043 domain-containing protein	SH01_10400, ,psos,DUF3043 domain-containing protein	SH02_06580, ,psos,DUF3043 domain-containing protein	SH03_01110, ,psos,DUF3043 domain-containing protein	TP1_02765, ,psos,DUF3043 domain-containing protein	TP2_08740, ,psos,DUF3043 domain-containing protein	TP3_03935, ,psos,DUF3043 domain-containing protein	TP4_00715, ,psos,DUF3043 domain-containing protein	TP4479_10280, ,psos,DUF3043 domain-containing protein	TP8_06310, ,psos,DUF3043 domain-containing protein	TP_2849_01335, ,psos,DUF3043 domain-containing protein	UFV1_02510, ,psos,DUF3043 domain-containing protein,IDENTICAL PARALOGS:,UFV1_03405,DUF3043 domain-containing protein	jx18_02495, ,psos,DUF3043 domain-containing protein
216	TP6375_01120, ,psos,hypothetical protein	2012CQ_ZSH_08835, ,psos,hypothetical protein	Arash114_01120, ,psos,hypothetical protein	Bu5_04700, ,psos,hypothetical protein	DSM_20630_03405, ,psos,hypothetical protein	- , -	NCTC5224_05800, ,psos,hypothetical protein	SH01_10395, ,psos,hypothetical protein	SH02_06585, ,psos,hypothetical protein	SH03_01115, ,psos,hypothetical protein	TP1_02760, ,psos,hypothetical protein	TP2_08735, ,psos,hypothetical protein	TP3_03940, ,psos,hypothetical protein	TP4_00710, ,psos,hypothetical protein	TP4479_10285, ,psos,hypothetical protein	TP8_06315, ,psos,hypothetical protein	TP_2849_01340, ,psos,hypothetical protein	UFV1_02515, ,psos,hypothetical protein,IDENTICAL PARALOGS:,UFV1_03410,hypothetical protein	jx18_02490, ,psos,hypothetical protein
217	TP6375_01125, ,psos,Cytosol aminopeptidase	2012CQ_ZSH_08840, ,psos,Cytosol aminopeptidase	Arash114_01125, ,psos,Cytosol aminopeptidase	Bu5_04695, ,psos,Cytosol aminopeptidase	DSM_20630_03410, ,psos,Cytosol aminopeptidase	MS249_10185, ,psos,Cytosol aminopeptidase	NCTC5224_05805, ,psos,Cytosol aminopeptidase	SH01_10390, ,psos,Cytosol aminopeptidase	SH02_06590, ,psos,Cytosol aminopeptidase	SH03_01120, ,psos,Cytosol aminopeptidase	TP1_02755, ,psos,Cytosol aminopeptidase	TP2_08730, ,psos,Cytosol aminopeptidase	TP3_03945, ,psos,Cytosol aminopeptidase	TP4_00705, ,psos,Cytosol aminopeptidase	TP4479_10290, ,psos,Cytosol aminopeptidase	TP8_06340, ,psos,leucyl aminopeptidase	TP_2849_01345, ,psos,Cytosol aminopeptidase	UFV1_02520, ,psos,Cytosol aminopeptidase,IDENTICAL PARALOGS:,UFV1_03415,Cytosol aminopeptidase	jx18_02485, ,psos,Cytosol aminopeptidase
218	TP6375_01130, ,psos,Oxidoreductase	2012CQ_ZSH_08845, ,psos,Oxidoreductase	Arash114_01130, ,psos,Oxidoreductase	Bu5_04690, ,psos,Oxidoreductase	DSM_20630_03415, ,psos,Oxidoreductase	MS249_10180, ,psos,Oxidoreductase	NCTC5224_05810, ,psos,Oxidoreductase	SH01_10385, ,psos,Oxidoreductase	SH02_06595, ,psos,Oxidoreductase	SH03_01125, ,psos,Oxidoreductase	TP1_02750, ,psos,Oxidoreductase	TP2_08725, ,psos,Oxidoreductase	TP3_03950, ,psos,Oxidoreductase	TP4_00700, ,psos,Oxidoreductase	TP4479_10295, ,psos,Oxidoreductase	TP8_06335, ,psos,Oxidoreductase	TP_2849_01350, ,psos,Oxidoreductase	UFV1_02525, ,psos,Oxidoreductase,IDENTICAL PARALOGS:,UFV1_03420,Oxidoreductase	jx18_02480, ,psos,Oxidoreductase
219	TP6375_01135, ,psos,Dihydrolipoyl dehydrogenase	2012CQ_ZSH_08850, ,psos,Dihydrolipoyl dehydrogenase	Arash114_01135, ,psos,Dihydrolipoyl dehydrogenase	Bu5_04685, ,psos,Dihydrolipoyl dehydrogenase	DSM_20630_03420, ,psos,Dihydrolipoyl dehydrogenase	MS249_04225, ,psos,Dihydrolipoyl dehydrogenase	NCTC5224_05815, ,psos,Dihydrolipoyl dehydrogenase	SH01_10380, ,psos,Dihydrolipoyl dehydrogenase	SH02_06600, ,psos,Dihydrolipoyl dehydrogenase	SH03_01130, ,psos,Dihydrolipoyl dehydrogenase	TP1_02745, ,psos,Dihydrolipoyl dehydrogenase	TP2_08720, ,psos,Dihydrolipoyl dehydrogenase	TP3_03955, ,psos,Dihydrolipoyl dehydrogenase	TP4_00695, ,psos,Dihydrolipoyl dehydrogenase	TP4479_10300, ,psos,Dihydrolipoyl dehydrogenase	TP8_06330, ,psos,Dihydrolipoyl dehydrogenase	TP_2849_01355, ,psos,Dihydrolipoyl dehydrogenase	UFV1_02530, ,psos,Dihydrolipoyl dehydrogenase,IDENTICAL PARALOGS:,UFV1_03425,Dihydrolipoyl dehydrogenase	jx18_02475, ,psos,Dihydrolipoyl dehydrogenase
220	TP6375_01140, ,psos,Dihydrolipoamide acetyltransferase component of pyruvate dehydrogenase complex	2012CQ_ZSH_08855, ,psos,Dihydrolipoamide acetyltransferase component of pyruvate dehydrogenase complex	Arash114_01140, ,psos,Dihydrolipoamide acetyltransferase component of pyruvate dehydrogenase complex	Bu5_04680, ,psos,Dihydrolipoamide acetyltransferase component of pyruvate dehydrogenase complex	DSM_20630_03425, ,psos,Dihydrolipoamide acetyltransferase component of pyruvate dehydrogenase complex	MS249_04230, ,psos,Dihydrolipoamide acetyltransferase component of pyruvate dehydrogenase complex	NCTC5224_05820, ,psos,Dihydrolipoamide acetyltransferase component of pyruvate dehydrogenase complex	SH01_10375, ,psos,Dihydrolipoamide acetyltransferase component of pyruvate dehydrogenase complex	SH02_06605, ,psos,Dihydrolipoamide acetyltransferase component of pyruvate dehydrogenase complex	SH03_01135, ,psos,Dihydrolipoamide acetyltransferase component of pyruvate dehydrogenase complex	TP1_02740, ,psos,Dihydrolipoamide acetyltransferase component of pyruvate dehydrogenase complex	TP2_08715, ,psos,Dihydrolipoamide acetyltransferase component of pyruvate dehydrogenase complex	TP3_03960, ,psos,Dihydrolipoamide acetyltransferase component of pyruvate dehydrogenase complex	TP4_00690, ,psos,Dihydrolipoamide acetyltransferase component of pyruvate dehydrogenase complex	TP4479_10305, ,psos,Dihydrolipoamide acetyltransferase component of pyruvate dehydrogenase complex	TP8_06345, ,psos,2-oxoglutarate dehydrogenase, E2 component, dihydrolipoamide succinyltransferase	TP_2849_01360, ,psos,Dihydrolipoamide acetyltransferase component of pyruvate dehydrogenase complex	UFV1_02535, ,psos,Dihydrolipoamide acetyltransferase component of pyruvate dehydrogenase complex,IDENTICAL PARALOGS:,UFV1_03430,Dihydrolipoamide acetyltransferase component of pyruvate dehydrogenase complex	jx18_02470, ,psos,Dihydrolipoamide acetyltransferase component of pyruvate dehydrogenase complex
221	TP6375_01145, ,psos,hypothetical protein	2012CQ_ZSH_08860, ,psos,hypothetical protein	Arash114_01145, ,psos,hypothetical protein	Bu5_04675, ,psos,hypothetical protein	DSM_20630_03430, ,psos,hypothetical protein	- , -	NCTC5224_05825, ,psos,hypothetical protein	SH01_10370, ,psos,hypothetical protein	SH02_06610, ,psos,hypothetical protein	SH03_01140, ,psos,hypothetical protein	TP1_02735, ,psos,hypothetical protein	TP2_08710, ,psos,hypothetical protein	TP3_03965, ,psos,hypothetical protein	TP4_00685, ,psos,hypothetical protein	TP4479_10310, ,psos,hypothetical protein	TP8_06350, ,psos,hypothetical protein	TP_2849_01365, ,psos,hypothetical protein	UFV1_02540, ,psos,hypothetical protein,IDENTICAL PARALOGS:,UFV1_03435,hypothetical protein	jx18_02465, ,psos,hypothetical protein
222	TP6375_01150, ,psos,MFS transporter	2012CQ_ZSH_08865, ,psos,MFS transporter	Arash114_01150, ,psos,MFS transporter	Bu5_04670, ,psos,MFS transporter	DSM_20630_03435, ,psos,MFS transporter	MS249_05280, ,psos,MFS transporter	NCTC5224_05830, ,psos,MFS transporter	SH01_10365, ,psos,MFS transporter	SH02_06615, ,psos,MFS transporter	SH03_01145, ,psos,MFS transporter	TP1_02730, ,psos,MFS transporter	TP2_08705, ,psos,MFS transporter	TP3_03970, ,psos,MFS transporter	TP4_00680, ,psos,MFS transporter	TP4479_10315, ,psos,MFS transporter	TP8_06355, ,psos,MFS transporter	TP_2849_01370, ,psos,MFS transporter	UFV1_02545, ,psos,MFS transporter,IDENTICAL PARALOGS:,UFV1_03440,MFS transporter	jx18_02460, ,psos,MFS transporter
223	TP6375_01155, ,psos,DUF4191 domain-containing protein	2012CQ_ZSH_08870, ,psos,DUF4191 domain-containing protein	Arash114_01155, ,psos,DUF4191 domain-containing protein	Bu5_04665, ,psos,DUF4191 domain-containing protein	DSM_20630_03440, ,psos,DUF4191 domain-containing protein	MS249_05275, ,psos,DUF4191 domain-containing protein	NCTC5224_05835, ,psos,DUF4191 domain-containing protein	SH01_10360, ,psos,DUF4191 domain-containing protein	SH02_06620, ,psos,DUF4191 domain-containing protein	SH03_01150, ,psos,DUF4191 domain-containing protein	TP1_02725, ,psos,DUF4191 domain-containing protein	TP2_08700, ,psos,DUF4191 domain-containing protein	TP3_03975, ,psos,DUF4191 domain-containing protein	TP4_00675, ,psos,DUF4191 domain-containing protein	TP4479_10320, ,psos,DUF4191 domain-containing protein	TP8_06360, ,psos,DUF4191 domain-containing protein	TP_2849_01375, ,psos,DUF4191 domain-containing protein	UFV1_02550, ,psos,DUF4191 domain-containing protein,IDENTICAL PARALOGS:,UFV1_03445,DUF4191 domain-containing protein	jx18_02455, ,psos,DUF4191 domain-containing protein
224	TP6375_01160, ,psos,Glutamine synthetase	2012CQ_ZSH_08875, ,psos,Glutamine synthetase	Arash114_01160, ,psos,Glutamine synthetase	Bu5_04660, ,psos,Glutamine synthetase	DSM_20630_03445, ,psos,Glutamine synthetase	MS249_05270, ,psos,Glutamine synthetase	NCTC5224_05840, ,psos,Glutamine synthetase	SH01_10355, ,psos,Glutamine synthetase	SH02_06625, ,psos,Glutamine synthetase	SH03_01155, ,psos,Glutamine synthetase	TP1_02720, ,psos,Glutamine synthetase	TP2_08695, ,psos,Glutamine synthetase	TP3_03980, ,psos,Glutamine synthetase	TP4_00670, ,psos,Glutamine synthetase	TP4479_10325, ,psos,Glutamine synthetase	TP8_06365, ,psos,Glutamine synthetase	TP_2849_01380, ,psos,Glutamine synthetase	UFV1_02555, ,psos,Glutamine synthetase,IDENTICAL PARALOGS:,UFV1_03450,Glutamine synthetase	jx18_02450, ,psos,Glutamine synthetase
225	TP6375_01165, ,psos,Histidine phosphatase family protein	2012CQ_ZSH_08880, ,psos,Histidine phosphatase family protein	Arash114_01165, ,psos,Histidine phosphatase family protein	Bu5_04655, ,psos,Histidine phosphatase family protein	DSM_20630_03450, ,psos,Histidine phosphatase family protein	MS249_05265, ,psos,Histidine phosphatase family protein	NCTC5224_05845, ,psos,Histidine phosphatase family protein	SH01_10350, ,psos,Histidine phosphatase family protein	SH02_06630, ,psos,Histidine phosphatase family protein	SH03_01160, ,psos,Histidine phosphatase family protein	TP1_02715, ,psos,Histidine phosphatase family protein	TP2_08690, ,psos,Histidine phosphatase family protein	TP3_03985, ,psos,Histidine phosphatase family protein	TP4_00665, ,psos,Histidine phosphatase family protein	TP4479_10330, ,psos,Histidine phosphatase family protein	TP8_06370, ,psos,Histidine phosphatase family protein	TP_2849_01385, ,psos,Histidine phosphatase family protein	UFV1_02560, ,psos,Histidine phosphatase family protein,IDENTICAL PARALOGS:,UFV1_03455,Histidine phosphatase family protein	jx18_02445, ,psos,Histidine phosphatase family protein
226	TP6375_01170, ,psos,Bifunctional [glutamine synthetase] adenylyltransferase/[glutamine synthetase]-adenylyl-L-tyrosine phosphorylase	2012CQ_ZSH_08885, ,psos,Bifunctional [glutamine synthetase] adenylyltransferase/[glutamine synthetase]-adenylyl-L-tyrosine phosphorylase	Arash114_01170, ,psos,Bifunctional [glutamine synthetase] adenylyltransferase/[glutamine synthetase]-adenylyl-L-tyrosine phosphorylase	Bu5_04650, ,psos,Bifunctional [glutamine synthetase] adenylyltransferase/[glutamine synthetase]-adenylyl-L-tyrosine phosphorylase	DSM_20630_03455, ,psos,Bifunctional [glutamine synthetase] adenylyltransferase/[glutamine synthetase]-adenylyl-L-tyrosine phosphorylase	MS249_05260, ,psos,Bifunctional [glutamine synthetase] adenylyltransferase/[glutamine synthetase]-adenylyl-L-tyrosine phosphorylase	NCTC5224_05850, ,psos,Bifunctional [glutamine synthetase] adenylyltransferase/[glutamine synthetase]-adenylyl-L-tyrosine phosphorylase	SH01_10345, ,psos,Bifunctional [glutamine synthetase] adenylyltransferase/[glutamine synthetase]-adenylyl-L-tyrosine phosphorylase	SH02_06635, ,psos,Bifunctional [glutamine synthetase] adenylyltransferase/[glutamine synthetase]-adenylyl-L-tyrosine phosphorylase	SH03_01165, ,psos,Bifunctional [glutamine synthetase] adenylyltransferase/[glutamine synthetase]-adenylyl-L-tyrosine phosphorylase	TP1_02710, ,psos,Bifunctional [glutamine synthetase] adenylyltransferase/[glutamine synthetase]-adenylyl-L-tyrosine phosphorylase	TP2_08685, ,psos,Bifunctional [glutamine synthetase] adenylyltransferase/[glutamine synthetase]-adenylyl-L-tyrosine phosphorylase	TP3_03990, ,psos,Bifunctional [glutamine synthetase] adenylyltransferase/[glutamine synthetase]-adenylyl-L-tyrosine phosphorylase	TP4_00660, ,psos,Bifunctional [glutamine synthetase] adenylyltransferase/[glutamine synthetase]-adenylyl-L-tyrosine phosphorylase	TP4479_10335, ,psos,Bifunctional [glutamine synthetase] adenylyltransferase/[glutamine synthetase]-adenylyl-L-tyrosine phosphorylase	TP8_06375, ,psos,Bifunctional [glutamine synthetase] adenylyltransferase/[glutamine synthetase]-adenylyl-L-tyrosine phosphorylase	TP_2849_01390, ,psos,Bifunctional [glutamine synthetase] adenylyltransferase/[glutamine synthetase]-adenylyl-L-tyrosine phosphorylase	UFV1_02565, ,psos,Bifunctional [glutamine synthetase] adenylyltransferase/[glutamine synthetase]-adenylyl-L-tyrosine phosphorylase,IDENTICAL PARALOGS:,UFV1_03460,Bifunctional [glutamine synthetase] adenylyltransferase/[glutamine synthetase]-adenylyl-L-tyrosine phosphorylase	jx18_02440, ,psos,Bifunctional [glutamine synthetase] adenylyltransferase/[glutamine synthetase]-adenylyl-L-tyrosine phosphorylase
227	TP6375_01175, ,psos,Glutamine synthetase	2012CQ_ZSH_08890, ,psos,Glutamine synthetase	Arash114_01175, ,psos,Glutamine synthetase	Bu5_04645, ,psos,Glutamine synthetase	DSM_20630_03460, ,psos,Glutamine synthetase	MS249_05255, ,psos,Glutamine synthetase	NCTC5224_05855, ,psos,Glutamine synthetase	SH01_10340, ,psos,Glutamine synthetase	SH02_06640, ,psos,Glutamine synthetase	SH03_01170, ,psos,Glutamine synthetase	TP1_02705, ,psos,Glutamine synthetase	TP2_08680, ,psos,Glutamine synthetase	TP3_03995, ,psos,Glutamine synthetase	TP4_00655, ,psos,Glutamine synthetase	TP4479_10340, ,psos,Glutamine synthetase	TP8_06380, ,psos,Glutamine synthetase	TP_2849_01395, ,psos,Glutamine synthetase	UFV1_02570, ,psos,Glutamine synthetase,IDENTICAL PARALOGS:,UFV1_03465,Glutamine synthetase	jx18_02435, ,psos,Glutamine synthetase
228	TP6375_01180, ,psos,hypothetical protein	2012CQ_ZSH_08895, ,psos,hypothetical protein	Arash114_01180, ,psos,hypothetical protein	Bu5_04640, ,psos,hypothetical protein	DSM_20630_03465, ,psos,hypothetical protein	MS249_05250, ,psos,hypothetical protein	NCTC5224_05860, ,psos,hypothetical protein	SH01_10335, ,psos,hypothetical protein	SH02_06645, ,psos,hypothetical protein	SH03_01175, ,psos,hypothetical protein	TP1_02700, ,psos,hypothetical protein	TP2_08675, ,psos,hypothetical protein	TP3_04000, ,psos,hypothetical protein	TP4_00650, ,psos,hypothetical protein	TP4479_10345, ,psos,hypothetical protein	TP8_06385, ,psos,hypothetical protein	TP_2849_01400, ,psos,hypothetical protein	UFV1_02575, ,psos,hypothetical protein,IDENTICAL PARALOGS:,UFV1_03470,hypothetical protein	jx18_02430, ,psos,hypothetical protein
229	TP6375_01185, ,psos,Methionine aminopeptidase	2012CQ_ZSH_08900, ,psos,Methionine aminopeptidase	Arash114_01185, ,psos,Methionine aminopeptidase	Bu5_04635, ,psos,Methionine aminopeptidase	DSM_20630_03470, ,psos,Methionine aminopeptidase	MS249_05245, ,psos,Methionine aminopeptidase	NCTC5224_05865, ,psos,Methionine aminopeptidase	SH01_10330, ,psos,Methionine aminopeptidase	SH02_06650, ,psos,Methionine aminopeptidase	SH03_01180, ,psos,Methionine aminopeptidase	TP1_02695, ,psos,Methionine aminopeptidase	TP2_08670, ,psos,Methionine aminopeptidase	TP3_04005, ,psos,Methionine aminopeptidase	TP4_00645, ,psos,Methionine aminopeptidase	TP4479_10350, ,psos,Methionine aminopeptidase	TP8_06390, ,psos,Methionine aminopeptidase	TP_2849_01405, ,psos,Methionine aminopeptidase	UFV1_02580, ,psos,Methionine aminopeptidase,IDENTICAL PARALOGS:,UFV1_03475,Methionine aminopeptidase	jx18_02425, ,psos,Methionine aminopeptidase
230	TP6375_01190, ,psos,Polyphosphate glucokinase	2012CQ_ZSH_08905, ,psos,Polyphosphate glucokinase	Arash114_01190, ,psos,Polyphosphate glucokinase	Bu5_04630, ,psos,Polyphosphate glucokinase	DSM_20630_03475, ,psos,Polyphosphate glucokinase	MS249_05240, ,psos,Polyphosphate glucokinase	NCTC5224_05870, ,psos,Polyphosphate glucokinase	SH01_10325, ,psos,Polyphosphate glucokinase	SH02_06655, ,psos,Polyphosphate glucokinase	SH03_01185, ,psos,Polyphosphate glucokinase	TP1_02690, ,psos,Polyphosphate glucokinase	TP2_08665, ,psos,Polyphosphate glucokinase	TP3_04010, ,psos,Polyphosphate glucokinase	TP4_00640, ,psos,Polyphosphate glucokinase	TP4479_10355, ,psos,Polyphosphate glucokinase	TP8_06395, ,psos,Polyphosphate glucokinase	TP_2849_01410, ,psos,Polyphosphate glucokinase	UFV1_02585, ,psos,Polyphosphate glucokinase,IDENTICAL PARALOGS:,UFV1_03480,Polyphosphate glucokinase	jx18_02420, ,psos,Polyphosphate glucokinase
231	TP6375_01200, ,psos,Peroxide stress protein YaaA	2012CQ_ZSH_08915, ,psos,Peroxide stress protein YaaA	Arash114_01200, ,psos,Peroxide stress protein YaaA	Bu5_04620, ,psos,Peroxide stress protein YaaA	DSM_20630_03485, ,psos,Peroxide stress protein YaaA	MS249_05230, ,psos,Peroxide stress protein YaaA	NCTC5224_05880, ,psos,Peroxide stress protein YaaA	SH01_10315, ,psos,Peroxide stress protein YaaA	SH02_06665, ,psos,Peroxide stress protein YaaA	SH03_01195, ,psos,Peroxide stress protein YaaA	TP1_02680, ,psos,Peroxide stress protein YaaA	TP2_08655, ,psos,Peroxide stress protein YaaA	TP3_04020, ,psos,Peroxide stress protein YaaA	TP4_00630, ,psos,Peroxide stress protein YaaA	TP4479_10365, ,psos,Peroxide stress protein YaaA	TP8_06405, ,psos,Peroxide stress protein YaaA	TP_2849_01420, ,psos,Peroxide stress protein YaaA	UFV1_02595, ,psos,Peroxide stress protein YaaA,IDENTICAL PARALOGS:,UFV1_03490,Peroxide stress protein YaaA	jx18_02410, ,psos,Peroxide stress protein YaaA
232	TP6375_01205, ,psos,hypothetical protein	2012CQ_ZSH_08920, ,psos,hypothetical protein	Arash114_01205, ,psos,hypothetical protein	Bu5_04615, ,psos,hypothetical protein	DSM_20630_03490, ,psos,hypothetical protein	MS249_05225, ,psos,hypothetical protein	NCTC5224_05885, ,psos,hypothetical protein	SH01_10310, ,psos,hypothetical protein	SH02_06670, ,psos,hypothetical protein	SH03_01200, ,psos,hypothetical protein	TP1_02675, ,psos,hypothetical protein	TP2_08650, ,psos,hypothetical protein	TP3_04025, ,psos,hypothetical protein	TP4_00625, ,psos,hypothetical protein	TP4479_10370, ,psos,hypothetical protein	TP8_06410, ,psos,hypothetical protein	TP_2849_01425, ,psos,hypothetical protein	UFV1_02600, ,psos,hypothetical protein,IDENTICAL PARALOGS:,UFV1_03495,hypothetical protein	jx18_02405, ,psos,hypothetical protein
233	TP6375_01210, ,psos,Metal-binding protein	2012CQ_ZSH_08925, ,psos,Metal-binding protein	Arash114_01210, ,psos,Metal-binding protein	Bu5_04610, ,psos,Metal-binding protein	DSM_20630_03495, ,psos,Metal-binding protein	MS249_05220, ,psos,Metal-binding protein	NCTC5224_05890, ,psos,Metal-binding protein	SH01_10305, ,psos,Metal-binding protein	SH02_06675, ,psos,Metal-binding protein	SH03_01205, ,psos,Metal-binding protein	TP1_02670, ,psos,Metal-binding protein	TP2_08645, ,psos,Metal-binding protein	TP3_04030, ,psos,Metal-binding protein	TP4_00620, ,psos,Metal-binding protein	TP4479_10375, ,psos,Metal-binding protein	TP8_06415, ,psos,Metal-binding protein	TP_2849_01430, ,psos,Metal-binding protein	UFV1_02605, ,psos,Metal-binding protein,IDENTICAL PARALOGS:,UFV1_03500,Metal-binding protein	jx18_02400, ,psos,Metal-binding protein
234	TP6375_01215, ,psos,Putative fluoride ion transporter CrcB	2012CQ_ZSH_08930, ,psos,Putative fluoride ion transporter CrcB	Arash114_01215, ,psos,Putative fluoride ion transporter CrcB	Bu5_04605, ,psos,Putative fluoride ion transporter CrcB	DSM_20630_03500, ,psos,Putative fluoride ion transporter CrcB	MS249_05215, ,psos,Putative fluoride ion transporter CrcB	NCTC5224_05895, ,psos,Putative fluoride ion transporter CrcB	SH01_10300, ,psos,Putative fluoride ion transporter CrcB	SH02_06680, ,psos,Putative fluoride ion transporter CrcB	SH03_01210, ,psos,Putative fluoride ion transporter CrcB	TP1_02665, ,psos,Putative fluoride ion transporter CrcB	- , -	TP3_04035, ,psos,Putative fluoride ion transporter CrcB	TP4_00615, ,psos,Putative fluoride ion transporter CrcB	TP4479_10380, ,psos,Putative fluoride ion transporter CrcB	TP8_06420, ,psos,Putative fluoride ion transporter CrcB	TP_2849_01435, ,psos,Putative fluoride ion transporter CrcB	UFV1_02610, ,psos,Putative fluoride ion transporter CrcB,IDENTICAL PARALOGS:,UFV1_03505,Putative fluoride ion transporter CrcB	jx18_02395, ,psos,Putative fluoride ion transporter CrcB
235	TP6375_01220, ,psos,Putative fluoride ion transporter CrcB	2012CQ_ZSH_08935, ,psos,Putative fluoride ion transporter CrcB	Arash114_01220, ,psos,Putative fluoride ion transporter CrcB	Bu5_04600, ,psos,Putative fluoride ion transporter CrcB	DSM_20630_03505, ,psos,Putative fluoride ion transporter CrcB	MS249_05210, ,psos,Putative fluoride ion transporter CrcB	NCTC5224_05900, ,psos,Putative fluoride ion transporter CrcB	SH01_10295, ,psos,Putative fluoride ion transporter CrcB	SH02_06685, ,psos,Putative fluoride ion transporter CrcB	SH03_01215, ,psos,Putative fluoride ion transporter CrcB	TP1_02660, ,psos,Putative fluoride ion transporter CrcB	- , -	TP3_04040, ,psos,Putative fluoride ion transporter CrcB	TP4_00610, ,psos,Putative fluoride ion transporter CrcB	TP4479_10385, ,psos,Putative fluoride ion transporter CrcB	TP8_06425, ,psos,Putative fluoride ion transporter CrcB	TP_2849_01440, ,psos,Putative fluoride ion transporter CrcB	UFV1_02615, ,psos,Putative fluoride ion transporter CrcB,IDENTICAL PARALOGS:,UFV1_03510,Putative fluoride ion transporter CrcB	jx18_02390, ,psos,Putative fluoride ion transporter CrcB
236	TP6375_01225, ,psos,hypothetical protein	2012CQ_ZSH_08940, ,psos,hypothetical protein	Arash114_01225, ,psos,hypothetical protein	Bu5_04595, ,psos,hypothetical protein	DSM_20630_03510, ,psos,hypothetical protein	MS249_05205, ,psos,hypothetical protein	NCTC5224_05905, ,psos,hypothetical protein	- , -	- , -	SH03_01220, ,psos,hypothetical protein	TP1_02655, ,psos,hypothetical protein	TP2_08640, ,psos,hypothetical protein	TP3_04045, ,psos,hypothetical protein	TP4_00605, ,psos,hypothetical protein	TP4479_10390, ,psos,hypothetical protein	TP8_06430, ,psos,hypothetical protein	TP_2849_01445, ,psos,hypothetical protein	UFV1_02620, ,psos,hypothetical protein	jx18_02385, ,psos,hypothetical protein
237	TP6375_01230, ,psos,hypothetical protein	- , -	- , -	- , -	- , -	- , -	- , -	- , -	- , -	- , -	- , -	- , -	- , -	TP4_00600, ,psos,hypothetical protein	TP4479_00655, ,psos,hypothetical protein	- , -	TP_2849_02580, ,psos,hypothetical protein	UFV1_05070, ,psos,hypothetical protein	- , -
238	TP6375_01235, ,psos,hypothetical protein	- , -	Arash114_01230, ,psos,hypothetical protein	- , -	- , -	MS249_01020, ,psos,Alpha-amylase	- , -	- , -	- , -	- , -	TP1_02650, ,psos,hypothetical protein	TP2_08635, ,psos,hypothetical protein	- , -	- , -	- , -	- , -	- , -	UFV1_05075, ,psos,hypothetical protein	- , -
239	TP6375_01245, ,psos,DUF3052 domain-containing protein	2012CQ_ZSH_08955, ,psos,DUF3052 domain-containing protein	Arash114_01240, ,psos,DUF3052 domain-containing protein	Bu5_04580, ,psos,DUF3052 domain-containing protein	DSM_20630_03525, ,psos,DUF3052 domain-containing protein	MS249_01035, ,psos,DUF3052 domain-containing protein	NCTC5224_05920, ,psos,DUF3052 domain-containing protein	SH01_08070, ,psos,DUF3052 domain-containing protein	SH02_04320, ,psos,DUF3052 domain-containing protein	SH03_01235, ,psos,DUF3052 domain-containing protein	TP1_02640, ,psos,DUF3052 domain-containing protein	TP2_08625, ,psos,DUF3052 domain-containing protein	TP3_04060, ,psos,DUF3052 domain-containing protein	TP4_00585, ,psos,DUF3052 domain-containing protein	TP4479_10405, ,psos,DUF3052 domain-containing protein	TP8_06445, ,psos,DUF3052 domain-containing protein	TP_2849_01460, ,psos,DUF3052 domain-containing protein	UFV1_05085, ,psos,DUF3052 domain-containing protein	jx18_02370, ,psos,DUF3052 domain-containing protein
240	TP6375_01250, ,psos,Pyruvate dehydrogenase E1 component	2012CQ_ZSH_08960, ,psos,Pyruvate dehydrogenase E1 component	Arash114_01245, ,psos,Pyruvate dehydrogenase E1 component	Bu5_04575, ,psos,Pyruvate dehydrogenase E1 component	DSM_20630_03530, ,psos,Pyruvate dehydrogenase E1 component	MS249_01040, ,psos,Pyruvate dehydrogenase E1 component	NCTC5224_05925, ,psos,Pyruvate dehydrogenase E1 component	SH01_08065, ,psos,Pyruvate dehydrogenase E1 component	SH02_04325, ,psos,Pyruvate dehydrogenase E1 component	SH03_01240, ,psos,Pyruvate dehydrogenase E1 component	TP1_02635, ,psos,Pyruvate dehydrogenase E1 component	TP2_08620, ,psos,Pyruvate dehydrogenase E1 component	TP3_04065, ,psos,Pyruvate dehydrogenase E1 component	TP4_00580, ,psos,Pyruvate dehydrogenase E1 component	TP4479_10410, ,psos,Pyruvate dehydrogenase E1 component	TP8_06450, ,psos,Pyruvate dehydrogenase E1 component	TP_2849_01465, ,psos,Pyruvate dehydrogenase E1 component	UFV1_05090, ,psos,Pyruvate dehydrogenase E1 component	jx18_02365, ,psos,Pyruvate dehydrogenase E1 component
241	TP6375_01255, ,psos,Probable multidrug resistance ABC transporter ATP-binding/permease protein YheI	2012CQ_ZSH_08965, ,psos,Probable multidrug resistance ABC transporter ATP-binding/permease protein YheI	Arash114_01250, ,psos,Probable multidrug resistance ABC transporter ATP-binding/permease protein YheI	Bu5_04570, ,psos,Probable multidrug resistance ABC transporter ATP-binding/permease protein YheI	DSM_20630_03535, ,psos,Probable multidrug resistance ABC transporter ATP-binding/permease protein YheI	MS249_01045, ,psos,Probable multidrug resistance ABC transporter ATP-binding/permease protein YheI	NCTC5224_05930, ,psos,Probable multidrug resistance ABC transporter ATP-binding/permease protein YheI	SH01_08060, ,psos,Probable multidrug resistance ABC transporter ATP-binding/permease protein YheI	SH02_04330, ,psos,Probable multidrug resistance ABC transporter ATP-binding/permease protein YheI	SH03_01245, ,psos,Probable multidrug resistance ABC transporter ATP-binding/permease protein YheI	TP1_02630, ,psos,Probable multidrug resistance ABC transporter ATP-binding/permease protein YheI	TP2_08615, ,psos,Probable multidrug resistance ABC transporter ATP-binding/permease protein YheI	TP3_04070, ,psos,Probable multidrug resistance ABC transporter ATP-binding/permease protein YheI	TP4_00575, ,psos,Probable multidrug resistance ABC transporter ATP-binding/permease protein YheI	TP4479_10415, ,psos,Probable multidrug resistance ABC transporter ATP-binding/permease protein YheI	TP8_06455, ,psos,Probable multidrug resistance ABC transporter ATP-binding/permease protein YheI	TP_2849_01470, ,psos,Probable multidrug resistance ABC transporter ATP-binding/permease protein YheI	UFV1_05095, ,psos,Probable multidrug resistance ABC transporter ATP-binding/permease protein YheI	jx18_02360, ,psos,Probable multidrug resistance ABC transporter ATP-binding/permease protein YheI
242	TP6375_01260, ,psos,Multidrug export ATP-binding/permease protein SAV1866	2012CQ_ZSH_08970, ,psos,Multidrug export ATP-binding/permease protein SAV1866	Arash114_01255, ,psos,Multidrug export ATP-binding/permease protein SAV1866	Bu5_04565, ,psos,Multidrug export ATP-binding/permease protein SAV1866	DSM_20630_03540, ,psos,Multidrug export ATP-binding/permease protein SAV1866	MS249_01050, ,psos,Multidrug export ATP-binding/permease protein SAV1866	NCTC5224_05935, ,psos,Multidrug export ATP-binding/permease protein SAV1866	SH01_08055, ,psos,Multidrug export ATP-binding/permease protein SAV1866	SH02_04335, ,psos,Multidrug export ATP-binding/permease protein SAV1866	SH03_01250, ,psos,Multidrug export ATP-binding/permease protein SAV1866	TP1_02625, ,psos,Multidrug export ATP-binding/permease protein SAV1866	TP2_08610, ,psos,Multidrug export ATP-binding/permease protein SAV1866	TP3_04075, ,psos,Multidrug export ATP-binding/permease protein SAV1866	TP4_00570, ,psos,Multidrug export ATP-binding/permease protein SAV1866	TP4479_10420, ,psos,Multidrug export ATP-binding/permease protein SAV1866	TP8_06460, ,psos,Multidrug export ATP-binding/permease protein SAV1866	TP_2849_01475, ,psos,Multidrug export ATP-binding/permease protein SAV1866	UFV1_05100, ,psos,Multidrug export ATP-binding/permease protein SAV1866	jx18_02355, ,psos,Multidrug export ATP-binding/permease protein SAV1866
243	TP6375_01265, ,psos,5-nucleotidase	2012CQ_ZSH_08975, ,psos,5-nucleotidase	Arash114_01260, ,psos,5-nucleotidase	Bu5_04560, ,psos,5-nucleotidase	DSM_20630_03545, ,psos,5-nucleotidase	MS249_01055, ,psos,5-nucleotidase	NCTC5224_05940, ,psos,5-nucleotidase	SH01_08050, ,psos,5-nucleotidase	SH02_04340, ,psos,5-nucleotidase	SH03_01255, ,psos,5-nucleotidase	TP1_02620, ,psos,5-nucleotidase	TP2_08605, ,psos,5-nucleotidase	TP3_04080, ,psos,5-nucleotidase	TP4_00565, ,psos,5-nucleotidase	TP4479_10425, ,psos,5-nucleotidase	TP8_06465, ,psos,5-nucleotidase	TP_2849_01480, ,psos,5-nucleotidase	UFV1_05105, ,psos,5-nucleotidase	jx18_02350, ,psos,5-nucleotidase
244	TP6375_01270, ,psos,Threonylcarbamoyl-AMP synthase	2012CQ_ZSH_08980, ,psos,Threonylcarbamoyl-AMP synthase	Arash114_01265, ,psos,Threonylcarbamoyl-AMP synthase	Bu5_04555, ,psos,Threonylcarbamoyl-AMP synthase	DSM_20630_03550, ,psos,Threonylcarbamoyl-AMP synthase	MS249_01060, ,psos,Threonylcarbamoyl-AMP synthase	NCTC5224_05945, ,psos,Threonylcarbamoyl-AMP synthase	SH01_08045, ,psos,Threonylcarbamoyl-AMP synthase	SH02_04345, ,psos,Threonylcarbamoyl-AMP synthase	SH03_01260, ,psos,Threonylcarbamoyl-AMP synthase	TP1_02615, ,psos,Threonylcarbamoyl-AMP synthase	TP2_08600, ,psos,Threonylcarbamoyl-AMP synthase	TP3_04085, ,psos,Threonylcarbamoyl-AMP synthase	TP4_00560, ,psos,Threonylcarbamoyl-AMP synthase	TP4479_10430, ,psos,Threonylcarbamoyl-AMP synthase	TP8_06470, ,psos,Threonylcarbamoyl-AMP synthase	TP_2849_01485, ,psos,Threonylcarbamoyl-AMP synthase	UFV1_05110, ,psos,Threonylcarbamoyl-AMP synthase	jx18_02345, ,psos,Threonylcarbamoyl-AMP synthase
245	TP6375_01275, ,psos,hypothetical protein	2012CQ_ZSH_08985, ,psos,hypothetical protein	Arash114_01270, ,psos,hypothetical protein	Bu5_04550, ,psos,hypothetical protein	DSM_20630_03555, ,psos,hypothetical protein	MS249_01065, ,psos,hypothetical protein	NCTC5224_05950, ,psos,hypothetical protein	SH01_08040, ,psos,hypothetical protein	SH02_04350, ,psos,hypothetical protein	SH03_01265, ,psos,hypothetical protein	TP1_02610, ,psos,hypothetical protein	TP2_08595, ,psos,hypothetical protein	TP3_04090, ,psos,hypothetical protein	TP4_00555, ,psos,hypothetical protein	TP4479_10435, ,psos,hypothetical protein	TP8_06475, ,psos,hypothetical protein	TP_2849_01490, ,psos,hypothetical protein	UFV1_05115, ,psos,hypothetical protein	jx18_02340, ,psos,hypothetical protein
246	TP6375_01280, ,psos,Carrier domain-containing protein	2012CQ_ZSH_08990, ,psos,Carrier domain-containing protein	Arash114_01275, ,psos,Carrier domain-containing protein	Bu5_04545, ,psos,Carrier domain-containing protein	DSM_20630_03560, ,psos,Carrier domain-containing protein	MS249_01070, ,psos,Carrier domain-containing protein	NCTC5224_05955, ,psos,Carrier domain-containing protein	SH01_08035, ,psos,Carrier domain-containing protein	SH02_04355, ,psos,Carrier domain-containing protein	SH03_01270, ,psos,Carrier domain-containing protein	TP1_02605, ,psos,Carrier domain-containing protein	TP2_08590, ,psos,Carrier domain-containing protein	TP3_04095, ,psos,Carrier domain-containing protein	TP4_00550, ,psos,Carrier domain-containing protein	TP4479_10440, ,psos,Carrier domain-containing protein	TP8_06480, ,psos,Carrier domain-containing protein	TP_2849_01495, ,psos,Carrier domain-containing protein	UFV1_05120, ,psos,Carrier domain-containing protein	jx18_02335, ,psos,Carrier domain-containing protein
247	TP6375_01285, ,psos,DUF3145 domain-containing protein	2012CQ_ZSH_08995, ,psos,DUF3145 domain-containing protein	Arash114_01280, ,psos,DUF3145 domain-containing protein	Bu5_04540, ,psos,DUF3145 domain-containing protein	DSM_20630_03565, ,psos,DUF3145 domain-containing protein	MS249_01075, ,psos,DUF3145 domain-containing protein	NCTC5224_05960, ,psos,DUF3145 domain-containing protein	SH01_08030, ,psos,DUF3145 domain-containing protein	SH02_04360, ,psos,DUF3145 domain-containing protein	SH03_01275, ,psos,DUF3145 domain-containing protein	TP1_02600, ,psos,DUF3145 domain-containing protein	TP2_08585, ,psos,DUF3145 domain-containing protein	TP3_04100, ,psos,DUF3145 domain-containing protein	TP4_00545, ,psos,DUF3145 domain-containing protein	TP4479_10445, ,psos,DUF3145 domain-containing protein	TP8_06485, ,psos,DUF3145 domain-containing protein	TP_2849_01500, ,psos,DUF3145 domain-containing protein	UFV1_05125, ,psos,DUF3145 domain-containing protein	jx18_02330, ,psos,DUF3145 domain-containing protein
248	TP6375_01290, ,psos,TIGR01777 family protein	2012CQ_ZSH_09000, ,psos,TIGR01777 family protein	Arash114_01285, ,psos,TIGR01777 family protein	Bu5_04535, ,psos,TIGR01777 family protein	DSM_20630_03570, ,psos,TIGR01777 family protein	MS249_01080, ,psos,TIGR01777 family protein	NCTC5224_05965, ,psos,TIGR01777 family protein	SH01_08025, ,psos,TIGR01777 family protein	SH02_04365, ,psos,TIGR01777 family protein	SH03_01280, ,psos,TIGR01777 family protein	TP1_02595, ,psos,TIGR01777 family protein	TP2_08580, ,psos,TIGR01777 family protein	TP3_04105, ,psos,TIGR01777 family protein	TP4_00540, ,psos,TIGR01777 family protein	TP4479_10450, ,psos,TIGR01777 family protein	TP8_06490, ,psos,TIGR01777 family protein	TP_2849_01505, ,psos,TIGR01777 family protein	UFV1_05130, ,psos,TIGR01777 family protein	jx18_02325, ,psos,TIGR01777 family protein
249	TP6375_01295, ,psos,Peptide deformylase	2012CQ_ZSH_09005, ,psos,Peptide deformylase	Arash114_01290, ,psos,Peptide deformylase	Bu5_04530, ,psos,Peptide deformylase	DSM_20630_03575, ,psos,Peptide deformylase	MS249_01085, ,psos,Peptide deformylase	NCTC5224_05970, ,psos,Peptide deformylase	SH01_08020, ,psos,Peptide deformylase	SH02_04370, ,psos,Peptide deformylase	SH03_01285, ,psos,Peptide deformylase	TP1_02590, ,psos,Peptide deformylase	TP2_08575, ,psos,Peptide deformylase	TP3_04110, ,psos,Peptide deformylase	TP4_00535, ,psos,Peptide deformylase	TP4479_10455, ,psos,Peptide deformylase	TP8_06495, ,psos,Peptide deformylase	TP_2849_01510, ,psos,Peptide deformylase	UFV1_05135, ,psos,Peptide deformylase	jx18_02320, ,psos,Peptide deformylase
250	TP6375_01300, ,psos,hypothetical protein	2012CQ_ZSH_09010, ,psos,hypothetical protein	Arash114_01295, ,psos,hypothetical protein	- , -	- , -	- , -	- , -	SH01_08015, ,psos,hypothetical protein	SH02_04375, ,psos,hypothetical protein	SH03_01290, ,psos,hypothetical protein	- , -	- , -	TP3_04115, ,psos,hypothetical protein	TP4_00530, ,psos,hypothetical protein	TP4479_10460, ,psos,hypothetical protein	- , -	TP_2849_01515, ,psos,hypothetical protein	- , -	jx18_02315, ,psos,hypothetical protein
251	TP6375_01310, ,psos,Integrase	2012CQ_ZSH_10340, ,psos,tyrosine-type recombinase/integrase	Arash114_01305, ,psos,Integrase	- , -	- , -	- , -	- , -	- , -	- , -	- , -	- , -	TP2_08565, ,psos,Integrase	- , -	- , -	- , -	- , -	- , -	- , -	- , -
252	TP6375_01315, ,psos,hypothetical protein	2012CQ_ZSH_10335, ,psos,hypothetical protein	Arash114_01310, ,psos,hypothetical protein	- , -	- , -	- , -	- , -	- , -	- , -	- , -	- , -	TP2_08560, ,psos,hypothetical protein	- , -	- , -	- , -	- , -	- , -	- , -	- , -
253	TP6375_01320, ,psos,hypothetical protein	2012CQ_ZSH_10330, ,psos,hypothetical protein	Arash114_01315, ,psos,hypothetical protein	- , -	- , -	- , -	- , -	- , -	- , -	- , -	- , -	TP2_08555, ,psos,hypothetical protein	- , -	- , -	- , -	- , -	- , -	- , -	- , -
254	TP6375_01325, ,psos,hypothetical protein	2012CQ_ZSH_10325, ,psos,N-acetylmuramoyl-L-alanine amidase	Arash114_01320, ,psos,hypothetical protein	- , -	- , -	- , -	- , -	- , -	- , -	- , -	- , -	TP2_08550, ,psos,hypothetical protein	- , -	- , -	- , -	- , -	- , -	- , -	- , -
255	TP6375_01330, ,psos,hypothetical protein	2012CQ_ZSH_10320, ,psos,hypothetical protein	Arash114_01325, ,psos,hypothetical protein	- , -	- , -	- , -	- , -	- , -	- , -	- , -	- , -	TP2_08545, ,psos,hypothetical protein	- , -	- , -	- , -	- , -	- , -	- , -	- , -
256	TP6375_01335, ,psos,hypothetical protein	2012CQ_ZSH_10315, ,psos,hypothetical protein	Arash114_01330, ,psos,hypothetical protein	- , -	- , -	- , -	- , -	- , -	- , -	- , -	- , -	TP2_08540, ,psos,hypothetical protein	- , -	- , -	- , -	- , -	- , -	- , -	- , -
257	TP6375_01340, ,psos,hypothetical protein	2012CQ_ZSH_10310, ,psos,hypothetical protein	Arash114_01335, ,psos,hypothetical protein	- , -	- , -	- , -	- , -	- , -	- , -	- , -	- , -	TP2_08535, ,psos,hypothetical protein	- , -	- , -	- , -	- , -	- , -	- , -	- , -
258	TP6375_01345, ,psos,hypothetical protein	- , -	Arash114_01340, ,psos,hypothetical protein	- , -	- , -	- , -	- , -	- , -	- , -	- , -	- , -	TP2_08530, ,psos,hypothetical protein	- , -	- , -	- , -	- , -	- , -	- , -	- , -
259	TP6375_01350, ,psos,hypothetical protein	- , -	Arash114_01345, ,psos,hypothetical protein	- , -	- , -	- , -	- , -	- , -	- , -	- , -	- , -	TP2_08525, ,psos,hypothetical protein	- , -	- , -	- , -	- , -	- , -	- , -	- , -
260	TP6375_01355, ,psos,hypothetical protein	2012CQ_ZSH_10300, ,psos,HK97 gp10 family phage protein	Arash114_01350, ,psos,hypothetical protein	- , -	- , -	- , -	- , -	- , -	- , -	- , -	- , -	TP2_08520, ,psos,hypothetical protein	- , -	- , -	- , -	- , -	- , -	- , -	- , -
261	TP6375_01360, ,psos,hypothetical protein	2012CQ_ZSH_10295, ,psos,hypothetical protein	Arash114_01355, ,psos,hypothetical protein	- , -	- , -	- , -	- , -	- , -	- , -	- , -	- , -	TP2_08515, ,psos,hypothetical protein	- , -	- , -	- , -	- , -	- , -	- , -	- , -
262	TP6375_01365, ,psos,hypothetical protein	- , -	Arash114_01360, ,psos,hypothetical protein	- , -	- , -	- , -	- , -	- , -	- , -	- , -	- , -	TP2_08510, ,psos,hypothetical protein	- , -	- , -	- , -	- , -	- , -	- , -	- , -
263	TP6375_01370, ,psos,hypothetical protein	2012CQ_ZSH_10285, ,psos,hypothetical protein	Arash114_01365, ,psos,hypothetical protein	- , -	- , -	- , -	- , -	- , -	- , -	- , -	- , -	TP2_08505, ,psos,hypothetical protein	- , -	- , -	- , -	- , -	- , -	- , -	- , -
264	TP6375_01375, ,psos,HK97 family phage prohead protease	2012CQ_ZSH_10280, ,psos,HK97 family phage prohead protease	Arash114_01370, ,psos,HK97 family phage prohead protease	- , -	- , -	- , -	- , -	- , -	- , -	- , -	- , -	TP2_08500, ,psos,HK97 family phage prohead protease	- , -	- , -	- , -	- , -	- , -	- , -	- , -
265	TP6375_01380, ,psos,Phage portal protein	2012CQ_ZSH_10275, ,psos,phage portal protein	Arash114_01375, ,psos,Phage portal protein	- , -	- , -	- , -	- , -	- , -	- , -	- , -	- , -	TP2_08495, ,psos,Phage portal protein	- , -	- , -	- , -	- , -	- , -	- , -	- , -
266	TP6375_01385, ,psos,hypothetical protein	2012CQ_ZSH_10270, ,psos,hypothetical protein	Arash114_01380, ,psos,hypothetical protein	- , -	- , -	- , -	- , -	- , -	- , -	- , -	- , -	TP2_08490, ,psos,hypothetical protein	- , -	- , -	- , -	- , -	- , -	- , -	- , -
267	TP6375_01390, ,psos,hypothetical protein	2012CQ_ZSH_10265, ,psos,hypothetical protein	Arash114_01385, ,psos,hypothetical protein	- , -	- , -	- , -	- , -	- , -	- , -	- , -	- , -	TP2_08485, ,psos,hypothetical protein	- , -	- , -	- , -	- , -	- , -	- , -	- , -
268	TP6375_01395, ,psos,HNH endonuclease	2012CQ_ZSH_10260, ,psos,HNH endonuclease	Arash114_01390, ,psos,HNH endonuclease	- , -	- , -	- , -	- , -	- , -	- , -	- , -	- , -	TP2_08480, ,psos,HNH endonuclease	- , -	- , -	- , -	- , -	- , -	- , -	- , -
269	TP6375_01400, ,psos,hypothetical protein	2012CQ_ZSH_10255, ,psos,hypothetical protein	Arash114_01395, ,psos,hypothetical protein	- , -	- , -	- , -	- , -	- , -	- , -	- , -	- , -	TP2_08475, ,psos,hypothetical protein	- , -	- , -	- , -	- , -	- , -	- , -	- , -
270	TP6375_01405, ,psos,hypothetical protein	2012CQ_ZSH_10250, ,psos,hypothetical protein	Arash114_01400, ,psos,hypothetical protein	- , -	- , -	- , -	- , -	- , -	- , -	- , -	- , -	TP2_08470, ,psos,hypothetical protein	- , -	- , -	- , -	- , -	- , -	- , -	- , -
271	TP6375_01410, ,psos,hypothetical protein	- , -	Arash114_01405, ,psos,hypothetical protein	- , -	- , -	- , -	- , -	- , -	- , -	- , -	- , -	TP2_08465, ,psos,hypothetical protein	- , -	- , -	- , -	- , -	- , -	- , -	- , -
272	TP6375_01415, ,psos,hypothetical protein	- , -	Arash114_01410, ,psos,hypothetical protein	- , -	- , -	- , -	- , -	- , -	- , -	- , -	- , -	TP2_08460, ,psos,hypothetical protein	- , -	- , -	- , -	- , -	- , -	- , -	- , -
273	TP6375_01420, ,psos,hypothetical protein	2012CQ_ZSH_10240, ,psos,hypothetical protein	Arash114_01415, ,psos,hypothetical protein	- , -	- , -	- , -	- , -	- , -	- , -	- , -	- , -	- , -	- , -	- , -	- , -	- , -	- , -	- , -	- , -
274	TP6375_01425, ,psos,hypothetical protein	- , -	Arash114_01420, ,psos,hypothetical protein	- , -	- , -	- , -	- , -	- , -	- , -	- , -	- , -	TP2_08455, ,psos,hypothetical protein	- , -	- , -	- , -	- , -	- , -	- , -	- , -
275	TP6375_01435, ,psos,hypothetical protein	2012CQ_ZSH_09020, ,psos,hypothetical protein	Arash114_01430, ,psos,hypothetical protein	Bu5_04520, ,psos,hypothetical protein	DSM_20630_03585, ,psos,hypothetical protein	MS249_01095, ,psos,hypothetical protein	NCTC5224_05980, ,psos,hypothetical protein	SH01_08005, ,psos,hypothetical protein	SH02_04385, ,psos,hypothetical protein	SH03_01300, ,psos,hypothetical protein	TP1_02580, ,psos,hypothetical protein	TP2_08445, ,psos,hypothetical protein	TP3_04125, ,psos,hypothetical protein	TP4_00520, ,psos,hypothetical protein	TP4479_10470, ,psos,hypothetical protein	TP8_06505, ,psos,hypothetical protein	TP_2849_01525, ,psos,hypothetical protein	UFV1_04685, ,psos,hypothetical protein	jx18_02305, ,psos,hypothetical protein
276	TP6375_01440, ,psos,hypothetical protein	2012CQ_ZSH_09025, ,psos,hypothetical protein	Arash114_01435, ,psos,hypothetical protein	Bu5_04515, ,psos,hypothetical protein	DSM_20630_03590, ,psos,hypothetical protein	MS249_01100, ,psos,hypothetical protein	NCTC5224_05985, ,psos,hypothetical protein	SH01_08000, ,psos,hypothetical protein	SH02_04390, ,psos,hypothetical protein	SH03_01305, ,psos,hypothetical protein	TP1_02575, ,psos,hypothetical protein	TP2_08440, ,psos,hypothetical protein	TP3_04130, ,psos,hypothetical protein	TP4_00515, ,psos,hypothetical protein	TP4479_10475, ,psos,hypothetical protein	TP8_06510, ,psos,hypothetical protein	TP_2849_01530, ,psos,hypothetical protein	UFV1_04690, ,psos,hypothetical protein	jx18_02300, ,psos,hypothetical protein
277	TP6375_01445, ,psos,PKD domain-containing protein	2012CQ_ZSH_09030, ,psos,PKD domain-containing protein	Arash114_01440, ,psos,PKD domain-containing protein	Bu5_04510, ,psos,hypothetical protein	DSM_20630_03595, ,psos,PKD domain-containing protein	MS249_01105, ,psos,PKD domain-containing protein	NCTC5224_05990, ,psos,PKD domain-containing protein	SH01_07995, ,psos,PKD domain-containing protein	SH02_04395, ,psos,PKD domain-containing protein	SH03_01310, ,psos,PKD domain-containing protein	TP1_02570, ,psos,PKD domain-containing protein	TP2_08435, ,psos,PKD domain-containing protein	TP3_04135, ,psos,PKD domain-containing protein	TP4_00510, ,psos,PKD domain-containing protein	TP4479_10480, ,psos,PKD domain-containing protein	TP8_06515, ,psos,PKD domain-containing protein	TP_2849_01535, ,psos,PKD domain-containing protein	UFV1_04695, ,psos,PKD domain-containing protein	jx18_02295, ,psos,PKD domain-containing protein
278	TP6375_01450, ,psos,Family of unknown function (DUF6318)	2012CQ_ZSH_09035, ,psos,Family of unknown function (DUF6318)	Arash114_01445, ,psos,Family of unknown function (DUF6318)	Bu5_04505, ,psos,Family of unknown function (DUF6318)	DSM_20630_03600, ,psos,Family of unknown function (DUF6318)	MS249_01110, ,psos,Family of unknown function (DUF6318)	NCTC5224_05995, ,psos,Family of unknown function (DUF6318)	SH01_07990, ,psos,Family of unknown function (DUF6318)	SH02_04400, ,psos,Family of unknown function (DUF6318)	SH03_01315, ,psos,Family of unknown function (DUF6318)	TP1_02565, ,psos,Family of unknown function (DUF6318)	TP2_08430, ,psos,Family of unknown function (DUF6318)	TP3_04140, ,psos,Family of unknown function (DUF6318)	TP4_00505, ,psos,Family of unknown function (DUF6318)	TP4479_10485, ,psos,Family of unknown function (DUF6318)	TP8_06520, ,psos,Family of unknown function (DUF6318)	TP_2849_01540, ,psos,Family of unknown function (DUF6318)	UFV1_04700, ,psos,Family of unknown function (DUF6318)	jx18_02290, ,psos,Family of unknown function (DUF6318)
279	TP6375_01455, ,psos,Hemin import ATP-binding protein HmuV	2012CQ_ZSH_09040, ,psos,Hemin import ATP-binding protein HmuV	Arash114_01450, ,psos,Hemin import ATP-binding protein HmuV	Bu5_04500, ,psos,Hemin import ATP-binding protein HmuV	DSM_20630_03605, ,psos,Hemin import ATP-binding protein HmuV	MS249_01115, ,psos,Hemin import ATP-binding protein HmuV	NCTC5224_06000, ,psos,Hemin import ATP-binding protein HmuV	SH01_07985, ,psos,Hemin import ATP-binding protein HmuV	SH02_04405, ,psos,Hemin import ATP-binding protein HmuV	SH03_01320, ,psos,Hemin import ATP-binding protein HmuV	TP1_02560, ,psos,Hemin import ATP-binding protein HmuV	TP2_08425, ,psos,Hemin import ATP-binding protein HmuV	TP3_04145, ,psos,Hemin import ATP-binding protein HmuV	TP4_00500, ,psos,Hemin import ATP-binding protein HmuV	TP4479_10490, ,psos,Hemin import ATP-binding protein HmuV	TP8_06525, ,psos,Hemin import ATP-binding protein HmuV	TP_2849_01545, ,psos,Hemin import ATP-binding protein HmuV	UFV1_04705, ,psos,Hemin import ATP-binding protein HmuV	jx18_02285, ,psos,Hemin import ATP-binding protein HmuV
280	TP6375_01460, ,psos,Probable ABC transporter permease protein HI_1471	2012CQ_ZSH_09045, ,psos,Probable ABC transporter permease protein HI_1471	Arash114_01455, ,psos,Probable ABC transporter permease protein HI_1471	Bu5_04495, ,psos,Probable ABC transporter permease protein HI_1471	DSM_20630_03610, ,psos,Probable ABC transporter permease protein HI_1471	MS249_01120, ,psos,Probable ABC transporter permease protein HI_1471	NCTC5224_06005, ,psos,Probable ABC transporter permease protein HI_1471	SH01_07980, ,psos,Probable ABC transporter permease protein HI_1471	SH02_04410, ,psos,Probable ABC transporter permease protein HI_1471	SH03_01325, ,psos,Probable ABC transporter permease protein HI_1471	TP1_02555, ,psos,Probable ABC transporter permease protein HI_1471	TP2_08420, ,psos,Probable ABC transporter permease protein HI_1471	TP3_04150, ,psos,Probable ABC transporter permease protein HI_1471	TP4_00495, ,psos,Probable ABC transporter permease protein HI_1471	TP4479_10495, ,psos,Probable ABC transporter permease protein HI_1471	TP8_06530, ,psos,Probable ABC transporter permease protein HI_1471	TP_2849_01550, ,psos,Probable ABC transporter permease protein HI_1471	UFV1_04710, ,psos,Probable ABC transporter permease protein HI_1471	jx18_02280, ,psos,Probable ABC transporter permease protein HI_1471
281	TP6375_01465, ,psos,Hemin ABC transporter substrate-binding protein	2012CQ_ZSH_09050, ,psos,Hemin ABC transporter substrate-binding protein	Arash114_01460, ,psos,Hemin ABC transporter substrate-binding protein	Bu5_04490, ,psos,Hemin ABC transporter substrate-binding protein	DSM_20630_03615, ,psos,Hemin ABC transporter substrate-binding protein	MS249_01125, ,psos,Hemin ABC transporter substrate-binding protein	NCTC5224_06010, ,psos,Hemin ABC transporter substrate-binding protein	SH01_07975, ,psos,Hemin ABC transporter substrate-binding protein	SH02_04415, ,psos,Hemin ABC transporter substrate-binding protein	SH03_01330, ,psos,Hemin ABC transporter substrate-binding protein	TP1_02550, ,psos,Hemin ABC transporter substrate-binding protein	TP2_08415, ,psos,Hemin ABC transporter substrate-binding protein	TP3_04155, ,psos,Hemin ABC transporter substrate-binding protein	TP4_00490, ,psos,Hemin ABC transporter substrate-binding protein	TP4479_10500, ,psos,Hemin ABC transporter substrate-binding protein	TP8_06535, ,psos,Hemin ABC transporter substrate-binding protein	TP_2849_01555, ,psos,Hemin ABC transporter substrate-binding protein	UFV1_04715, ,psos,Hemin ABC transporter substrate-binding protein	jx18_02275, ,psos,Hemin ABC transporter substrate-binding protein
282	TP6375_01470, ,psos,Internalin-A	2012CQ_ZSH_09055, ,psos,HtaA domain-containing protein	Arash114_01465, ,psos,Internalin-A	Bu5_04485, ,psos,HtaA domain-containing protein	DSM_20630_03620, ,psos,Internalin-A	MS249_01130, ,psos,Internalin-A	NCTC5224_06015, ,psos,Internalin-A	SH01_07970, ,psos,Internalin-A	SH02_04420, ,psos,Internalin-A	SH03_01335, ,psos,Internalin-A	TP1_02545, ,psos,Internalin-A	TP2_08410, ,psos,HtaA domain-containing protein	TP3_04160, ,psos,Internalin-A	TP4_00485, ,psos,Internalin-A	TP4479_10505, ,psos,Internalin-A	TP8_06540, ,psos,Internalin-A	TP_2849_01560, ,psos,Internalin-A	UFV1_04720, ,psos,Internalin-A	jx18_02270, ,psos,Internalin-A
283	TP6375_01480, ,psos,4Fe-4S dicluster domain-containing protein	2012CQ_ZSH_09065, ,psos,4Fe-4S dicluster domain-containing protein	Arash114_01475, ,psos,4Fe-4S dicluster domain-containing protein	Bu5_04475, ,psos,4Fe-4S dicluster domain-containing protein	DSM_20630_03630, ,psos,4Fe-4S dicluster domain-containing protein	MS249_01140, ,psos,4Fe-4S dicluster domain-containing protein	NCTC5224_06025, ,psos,4Fe-4S dicluster domain-containing protein	SH01_07960, ,psos,4Fe-4S dicluster domain-containing protein	SH02_04430, ,psos,4Fe-4S dicluster domain-containing protein	SH03_01345, ,psos,4Fe-4S dicluster domain-containing protein	TP1_02535, ,psos,4Fe-4S dicluster domain-containing protein	TP2_08400, ,psos,4Fe-4S dicluster domain-containing protein	TP3_04170, ,psos,4Fe-4S dicluster domain-containing protein	TP4_00475, ,psos,4Fe-4S dicluster domain-containing protein	TP4479_10515, ,psos,4Fe-4S dicluster domain-containing protein	TP8_06550, ,psos,4Fe-4S dicluster domain-containing protein	TP_2849_01570, ,psos,4Fe-4S dicluster domain-containing protein	UFV1_04730, ,psos,4Fe-4S dicluster domain-containing protein	jx18_02260, ,psos,4Fe-4S dicluster domain-containing protein
284	TP6375_01485, ,psos,Twin-argninine leader-binding protein DmsD	2012CQ_ZSH_09070, ,psos,Twin-argninine leader-binding protein DmsD	Arash114_01480, ,psos,Twin-argninine leader-binding protein DmsD	Bu5_04470, ,psos,Twin-argninine leader-binding protein DmsD	DSM_20630_03635, ,psos,Twin-argninine leader-binding protein DmsD	MS249_01145, ,psos,Twin-argninine leader-binding protein DmsD	NCTC5224_06030, ,psos,Twin-argninine leader-binding protein DmsD	SH01_07955, ,psos,Twin-argninine leader-binding protein DmsD	SH02_04435, ,psos,Twin-argninine leader-binding protein DmsD	SH03_01350, ,psos,Twin-argninine leader-binding protein DmsD	TP1_02530, ,psos,Twin-argninine leader-binding protein DmsD	TP2_08395, ,psos,Twin-argninine leader-binding protein DmsD	TP3_04175, ,psos,Twin-argninine leader-binding protein DmsD	TP4_00470, ,psos,Twin-argninine leader-binding protein DmsD	TP4479_10520, ,psos,Twin-argninine leader-binding protein DmsD	TP8_06555, ,psos,Twin-argninine leader-binding protein DmsD	TP_2849_01575, ,psos,Twin-argninine leader-binding protein DmsD	UFV1_04735, ,psos,Twin-argninine leader-binding protein DmsD	jx18_02255, ,psos,Twin-argninine leader-binding protein DmsD
285	TP6375_01490, ,psos,Sec-independent translocase	2012CQ_ZSH_09075, ,psos,Sec-independent translocase	Arash114_01485, ,psos,Sec-independent translocase	Bu5_04465, ,psos,Sec-independent translocase	DSM_20630_03640, ,psos,Sec-independent translocase	MS249_01150, ,psos,Sec-independent translocase	NCTC5224_06035, ,psos,Sec-independent translocase	SH01_07950, ,psos,Sec-independent translocase	SH02_04440, ,psos,Sec-independent translocase	SH03_01355, ,psos,Sec-independent translocase	TP1_02525, ,psos,Sec-independent translocase	TP2_08390, ,psos,Sec-independent translocase	TP3_04180, ,psos,Sec-independent translocase	TP4_00465, ,psos,Sec-independent translocase	TP4479_10525, ,psos,Sec-independent translocase	TP8_06560, ,psos,Sec-independent translocase	TP_2849_01580, ,psos,Sec-independent translocase	UFV1_04740, ,psos,Sec-independent translocase	jx18_02250, ,psos,Sec-independent translocase
286	TP6375_01495, ,psos,Sec-independent protein translocase protein TatA	2012CQ_ZSH_09080, ,psos,Sec-independent protein translocase protein TatA	Arash114_01490, ,psos,Sec-independent protein translocase protein TatA	Bu5_04460, ,psos,Sec-independent protein translocase protein TatA	DSM_20630_03645, ,psos,Sec-independent protein translocase protein TatA	MS249_01155, ,psos,Sec-independent protein translocase protein TatA	NCTC5224_06040, ,psos,Sec-independent protein translocase protein TatA	SH01_07945, ,psos,Sec-independent protein translocase protein TatA	SH02_04445, ,psos,Sec-independent protein translocase protein TatA	SH03_01360, ,psos,Sec-independent protein translocase protein TatA	TP1_02520, ,psos,Sec-independent protein translocase protein TatA	TP2_08385, ,psos,Sec-independent protein translocase protein TatA	TP3_04185, ,psos,Sec-independent protein translocase protein TatA	TP4_00460, ,psos,Sec-independent protein translocase protein TatA	TP4479_10530, ,psos,Sec-independent protein translocase protein TatA	TP8_06565, ,psos,Sec-independent protein translocase protein TatA	TP_2849_01585, ,psos,Sec-independent protein translocase protein TatA	UFV1_04745, ,psos,Sec-independent protein translocase protein TatA	jx18_02245, ,psos,Sec-independent protein translocase protein TatA
287	TP6375_01500, ,psos,Sec-independent protein translocase protein TatC	2012CQ_ZSH_09085, ,psos,Sec-independent protein translocase protein TatC	Arash114_01495, ,psos,Sec-independent protein translocase protein TatC	Bu5_04455, ,psos,Sec-independent protein translocase protein TatC	DSM_20630_03650, ,psos,Sec-independent protein translocase protein TatC	MS249_01160, ,psos,Sec-independent protein translocase protein TatC	NCTC5224_06045, ,psos,Sec-independent protein translocase protein TatC	SH01_07940, ,psos,Sec-independent protein translocase protein TatC	SH02_04450, ,psos,Sec-independent protein translocase protein TatC	SH03_01365, ,psos,Sec-independent protein translocase protein TatC	TP1_02515, ,psos,Sec-independent protein translocase protein TatC	TP2_08380, ,psos,Sec-independent protein translocase protein TatC	TP3_04190, ,psos,Sec-independent protein translocase protein TatC	TP4_00455, ,psos,Sec-independent protein translocase protein TatC	TP4479_10535, ,psos,Sec-independent protein translocase protein TatC	TP8_06570, ,psos,Sec-independent protein translocase protein TatC	TP_2849_01590, ,psos,Sec-independent protein translocase protein TatC	UFV1_04750, ,psos,Sec-independent protein translocase protein TatC	jx18_02240, ,psos,Sec-independent protein translocase protein TatC
288	TP6375_01505, ,psos,Molybdopterin-guanine dinucleotide biosynthesis protein	2012CQ_ZSH_09090, ,psos,Molybdopterin-guanine dinucleotide biosynthesis protein	Arash114_01500, ,psos,Molybdopterin-guanine dinucleotide biosynthesis protein	Bu5_04450, ,psos,Molybdopterin-guanine dinucleotide biosynthesis protein	DSM_20630_03655, ,psos,Molybdopterin-guanine dinucleotide biosynthesis protein	MS249_01165, ,psos,Molybdopterin-guanine dinucleotide biosynthesis protein	NCTC5224_06050, ,psos,Molybdopterin-guanine dinucleotide biosynthesis protein	SH01_07935, ,psos,Molybdopterin-guanine dinucleotide biosynthesis protein	SH02_04455, ,psos,Molybdopterin-guanine dinucleotide biosynthesis protein	SH03_01370, ,psos,Molybdopterin-guanine dinucleotide biosynthesis protein	TP1_02510, ,psos,Molybdopterin-guanine dinucleotide biosynthesis protein	TP2_08375, ,psos,Molybdopterin-guanine dinucleotide biosynthesis protein	TP3_04195, ,psos,Molybdopterin-guanine dinucleotide biosynthesis protein	TP4_00450, ,psos,Molybdopterin-guanine dinucleotide biosynthesis protein	TP4479_10540, ,psos,Molybdopterin-guanine dinucleotide biosynthesis protein	TP8_06575, ,psos,Molybdopterin-guanine dinucleotide biosynthesis protein	TP_2849_01595, ,psos,Molybdopterin-guanine dinucleotide biosynthesis protein	UFV1_04755, ,psos,Molybdopterin-guanine dinucleotide biosynthesis protein	jx18_02235, ,psos,Molybdopterin-guanine dinucleotide biosynthesis protein
289	TP6375_01510, ,psos,DNA primase	2012CQ_ZSH_09095, ,psos,DNA primase	Arash114_01505, ,psos,DNA primase	Bu5_04445, ,psos,DNA primase	DSM_20630_03660, ,psos,DNA primase	MS249_01170, ,psos,DNA primase	NCTC5224_06055, ,psos,DNA primase	SH01_07930, ,psos,DNA primase	SH02_04460, ,psos,DNA primase	SH03_01375, ,psos,DNA primase	TP1_02505, ,psos,DNA primase	TP2_08370, ,psos,DNA primase	TP3_04200, ,psos,DNA primase	TP4_00445, ,psos,DNA primase	TP4479_10545, ,psos,DNA primase	TP8_06580, ,psos,DNA primase	TP_2849_01600, ,psos,DNA primase	UFV1_04760, ,psos,DNA primase	jx18_02230, ,psos,DNA primase
290	TP6375_01515, ,psos,Deoxyguanosinetriphosphate triphosphohydrolase	2012CQ_ZSH_09100, ,psos,Deoxyguanosinetriphosphate triphosphohydrolase	Arash114_01510, ,psos,Deoxyguanosinetriphosphate triphosphohydrolase	Bu5_04440, ,psos,Deoxyguanosinetriphosphate triphosphohydrolase	DSM_20630_03665, ,psos,Deoxyguanosinetriphosphate triphosphohydrolase	MS249_01175, ,psos,Deoxyguanosinetriphosphate triphosphohydrolase	NCTC5224_06060, ,psos,Deoxyguanosinetriphosphate triphosphohydrolase	SH01_07925, ,psos,Deoxyguanosinetriphosphate triphosphohydrolase	SH02_04465, ,psos,Deoxyguanosinetriphosphate triphosphohydrolase	SH03_01380, ,psos,Deoxyguanosinetriphosphate triphosphohydrolase	TP1_02500, ,psos,Deoxyguanosinetriphosphate triphosphohydrolase	TP2_08365, ,psos,Deoxyguanosinetriphosphate triphosphohydrolase	TP3_04205, ,psos,Deoxyguanosinetriphosphate triphosphohydrolase	TP4_00440, ,psos,Deoxyguanosinetriphosphate triphosphohydrolase	TP4479_10550, ,psos,Deoxyguanosinetriphosphate triphosphohydrolase	TP8_06585, ,psos,Deoxyguanosinetriphosphate triphosphohydrolase	TP_2849_01605, ,psos,Deoxyguanosinetriphosphate triphosphohydrolase	UFV1_04765, ,psos,Deoxyguanosinetriphosphate triphosphohydrolase	jx18_02225, ,psos,Deoxyguanosinetriphosphate triphosphohydrolase
291	TP6375_01520, ,psos,hypothetical protein	2012CQ_ZSH_09105, ,psos,hypothetical protein	Arash114_01515, ,psos,hypothetical protein	Bu5_04435, ,psos,hypothetical protein	DSM_20630_03670, ,psos,hypothetical protein	MS249_01180, ,psos,hypothetical protein	NCTC5224_06065, ,psos,hypothetical protein	SH01_07920, ,psos,hypothetical protein	SH02_04470, ,psos,hypothetical protein	SH03_01385, ,psos,hypothetical protein	TP1_02495, ,psos,hypothetical protein	TP2_08360, ,psos,hypothetical protein	TP3_04210, ,psos,hypothetical protein	TP4_00435, ,psos,hypothetical protein	TP4479_10555, ,psos,hypothetical protein	TP8_06590, ,psos,hypothetical protein	TP_2849_01610, ,psos,hypothetical protein	UFV1_04770, ,psos,hypothetical protein	jx18_02220, ,psos,hypothetical protein
292	TP6375_01525, ,psos,Probable tRNA-dihydrouridine synthase	2012CQ_ZSH_09110, ,psos,Probable tRNA-dihydrouridine synthase	Arash114_01520, ,psos,Probable tRNA-dihydrouridine synthase	Bu5_04430, ,psos,Probable tRNA-dihydrouridine synthase	DSM_20630_03675, ,psos,Probable tRNA-dihydrouridine synthase	MS249_01185, ,psos,Probable tRNA-dihydrouridine synthase	NCTC5224_06070, ,psos,Probable tRNA-dihydrouridine synthase	SH01_07915, ,psos,Probable tRNA-dihydrouridine synthase	SH02_04475, ,psos,Probable tRNA-dihydrouridine synthase	SH03_01390, ,psos,Probable tRNA-dihydrouridine synthase	TP1_02490, ,psos,Probable tRNA-dihydrouridine synthase	TP2_08355, ,psos,Probable tRNA-dihydrouridine synthase	TP3_04215, ,psos,Probable tRNA-dihydrouridine synthase	TP4_00430, ,psos,Probable tRNA-dihydrouridine synthase	TP4479_10560, ,psos,Probable tRNA-dihydrouridine synthase	TP8_06595, ,psos,Probable tRNA-dihydrouridine synthase	TP_2849_01615, ,psos,Probable tRNA-dihydrouridine synthase	UFV1_04775, ,psos,Probable tRNA-dihydrouridine synthase	jx18_02215, ,psos,Probable tRNA-dihydrouridine synthase
293	TP6375_01530, ,psos,YibE/F-like protein	2012CQ_ZSH_09115, ,psos,YibE/F-like protein	Arash114_01525, ,psos,YibE/F-like protein	Bu5_04425, ,psos,YibE/F-like protein	DSM_20630_03680, ,psos,YibE/F-like protein	MS249_01190, ,psos,YibE/F-like protein	NCTC5224_06075, ,psos,YibE/F-like protein	SH01_07910, ,psos,YibE/F-like protein	SH02_04480, ,psos,YibE/F-like protein	SH03_01395, ,psos,YibE/F-like protein	TP1_02485, ,psos,YibE/F-like protein	TP2_08350, ,psos,YibE/F-like protein	TP3_04220, ,psos,YibE/F-like protein	TP4_00425, ,psos,YibE/F-like protein	TP4479_10565, ,psos,YibE/F-like protein	TP8_06600, ,psos,YibE/F-like protein	TP_2849_01620, ,psos,YibE/F-like protein	UFV1_04780, ,psos,YibE/F-like protein	jx18_02210, ,psos,YibE/F-like protein
294	TP6375_01535, ,psos,Glycine--tRNA ligase	2012CQ_ZSH_09120, ,psos,Glycine--tRNA ligase	Arash114_01530, ,psos,Glycine--tRNA ligase	Bu5_04420, ,psos,Glycine--tRNA ligase	DSM_20630_03685, ,psos,Glycine--tRNA ligase	MS249_01195, ,psos,Glycine--tRNA ligase	NCTC5224_06080, ,psos,Glycine--tRNA ligase	SH01_07905, ,psos,Glycine--tRNA ligase	SH02_04485, ,psos,Glycine--tRNA ligase	SH03_01400, ,psos,Glycine--tRNA ligase	TP1_02480, ,psos,Glycine--tRNA ligase	TP2_08345, ,psos,Glycine--tRNA ligase	TP3_04225, ,psos,Glycine--tRNA ligase	TP4_00420, ,psos,Glycine--tRNA ligase	TP4479_10570, ,psos,Glycine--tRNA ligase	TP8_06605, ,psos,Glycine--tRNA ligase	TP_2849_01625, ,psos,Glycine--tRNA ligase	UFV1_04785, ,psos,Glycine--tRNA ligase	jx18_02205, ,psos,Glycine--tRNA ligase
295	TP6375_01540, ,psos,Metal ABC transporter substrate-binding lipoprotein	2012CQ_ZSH_09125, ,psos,Metal ABC transporter substrate-binding lipoprotein	Arash114_01535, ,psos,Zinc-uptake complex component A periplasmic	Bu5_04415, ,psos,Metal ABC transporter substrate-binding lipoprotein	DSM_20630_03690, ,psos,Metal ABC transporter substrate-binding lipoprotein	MS249_01200, ,psos,Metal ABC transporter substrate-binding lipoprotein	NCTC5224_06085, ,psos,Metal ABC transporter substrate-binding lipoprotein	SH01_07900, ,psos,Metal ABC transporter substrate-binding lipoprotein	SH02_04490, ,psos,Metal ABC transporter substrate-binding lipoprotein	SH03_01405, ,psos,Metal ABC transporter substrate-binding lipoprotein	TP1_02475, ,psos,Metal ABC transporter substrate-binding lipoprotein	TP2_08340, ,psos,Metal ABC transporter substrate-binding lipoprotein	TP3_04230, ,psos,Metal ABC transporter substrate-binding lipoprotein	TP4_00415, ,psos,Metal ABC transporter substrate-binding lipoprotein	TP4479_10575, ,psos,Metal ABC transporter substrate-binding lipoprotein	TP8_06610, ,psos,Metal ABC transporter substrate-binding lipoprotein	TP_2849_01630, ,psos,Metal ABC transporter substrate-binding lipoprotein	UFV1_04790, ,psos,Metal ABC transporter substrate-binding lipoprotein	jx18_02200, ,psos,Metal ABC transporter substrate-binding lipoprotein
296	TP6375_01545, ,psos,Zinc import ATP-binding protein ZnuC	2012CQ_ZSH_09130, ,psos,Zinc import ATP-binding protein ZnuC	Arash114_01545, ,psos,Zinc import ATP-binding protein ZnuC	Bu5_04410, ,psos,Zinc import ATP-binding protein ZnuC	DSM_20630_03695, ,psos,Zinc import ATP-binding protein ZnuC	MS249_01205, ,psos,Zinc import ATP-binding protein ZnuC	NCTC5224_06090, ,psos,Zinc import ATP-binding protein ZnuC	SH01_07895, ,psos,Zinc import ATP-binding protein ZnuC	SH02_04495, ,psos,Zinc import ATP-binding protein ZnuC	SH03_01410, ,psos,Zinc import ATP-binding protein ZnuC	TP1_02470, ,psos,Zinc import ATP-binding protein ZnuC	TP2_08335, ,psos,Zinc import ATP-binding protein ZnuC	TP3_04235, ,psos,Zinc import ATP-binding protein ZnuC	TP4_00410, ,psos,Zinc import ATP-binding protein ZnuC	TP4479_10580, ,psos,Zinc import ATP-binding protein ZnuC	TP8_06615, ,psos,Zinc import ATP-binding protein ZnuC	TP_2849_01635, ,psos,Zinc import ATP-binding protein ZnuC	UFV1_04795, ,psos,Zinc import ATP-binding protein ZnuC	jx18_02195, ,psos,Zinc import ATP-binding protein ZnuC
297	TP6375_01550, ,psos,Manganese transport system membrane protein mntB	2012CQ_ZSH_09135, ,psos,Manganese transport system membrane protein mntB	Arash114_01550, ,psos,Manganese transport system membrane protein mntB	Bu5_04405, ,psos,Manganese transport system membrane protein mntB	DSM_20630_03700, ,psos,Manganese transport system membrane protein mntB	MS249_01210, ,psos,Manganese transport system membrane protein mntB	NCTC5224_06095, ,psos,Manganese transport system membrane protein mntB	SH01_07890, ,psos,Manganese transport system membrane protein mntB	SH02_04500, ,psos,Manganese transport system membrane protein mntB	SH03_01415, ,psos,Manganese transport system membrane protein mntB	TP1_02465, ,psos,Manganese transport system membrane protein mntB	TP2_08330, ,psos,Manganese transport system membrane protein mntB	TP3_04240, ,psos,Manganese transport system membrane protein mntB	TP4_00405, ,psos,Manganese transport system membrane protein mntB	TP4479_10585, ,psos,Manganese transport system membrane protein mntB	TP8_06620, ,psos,Manganese transport system membrane protein mntB	TP_2849_01640, ,psos,Manganese transport system membrane protein mntB	UFV1_04800, ,psos,Manganese transport system membrane protein mntB	jx18_02190, ,psos,Manganese transport system membrane protein mntB
298	TP6375_01555, ,psos,Ferric uptake regulation protein	2012CQ_ZSH_09140, ,psos,Ferric uptake regulation protein	Arash114_01555, ,psos,Ferric uptake regulation protein	Bu5_04400, ,psos,Ferric uptake regulation protein	DSM_20630_03705, ,psos,Ferric uptake regulation protein	MS249_01215, ,psos,Ferric uptake regulation protein	NCTC5224_06100, ,psos,Ferric uptake regulation protein	SH01_07885, ,psos,Ferric uptake regulation protein	SH02_04505, ,psos,Ferric uptake regulation protein	SH03_01420, ,psos,Ferric uptake regulation protein	TP1_02460, ,psos,Ferric uptake regulation protein	TP2_08325, ,psos,Ferric uptake regulation protein	TP3_04245, ,psos,Ferric uptake regulation protein	TP4_00400, ,psos,Ferric uptake regulation protein	TP4479_10590, ,psos,Ferric uptake regulation protein	TP8_06625, ,psos,Ferric uptake regulation protein	TP_2849_01645, ,psos,Ferric uptake regulation protein	UFV1_04805, ,psos,Ferric uptake regulation protein	jx18_02185, ,psos,Ferric uptake regulation protein
299	TP6375_01560, ,psos,DedA family protein	2012CQ_ZSH_09145, ,psos,DedA family protein	Arash114_01560, ,psos,DedA family protein	Bu5_04395, ,psos,DedA family protein	DSM_20630_03710, ,psos,DedA family protein	MS249_01220, ,psos,DedA family protein	NCTC5224_06105, ,psos,DedA family protein	SH01_07880, ,psos,DedA family protein	SH02_04510, ,psos,DedA family protein	SH03_01425, ,psos,DedA family protein	TP1_02455, ,psos,DedA family protein	TP2_08320, ,psos,DedA family protein	TP3_04250, ,psos,DedA family protein	TP4_00395, ,psos,DedA family protein	TP4479_10595, ,psos,DedA family protein	TP8_06630, ,psos,DedA family protein	TP_2849_01650, ,psos,DedA family protein	UFV1_04810, ,psos,DedA family protein	jx18_02180, ,psos,DedA family protein
300	TP6375_01565, ,psos,RNA-binding S4 domain-containing protein	2012CQ_ZSH_09150, ,psos,RNA-binding S4 domain-containing protein	Arash114_01565, ,psos,RNA-binding S4 domain-containing protein	Bu5_04390, ,psos,RNA-binding S4 domain-containing protein	DSM_20630_03715, ,psos,RNA-binding S4 domain-containing protein	MS249_01225, ,psos,RNA-binding S4 domain-containing protein	NCTC5224_06110, ,psos,RNA-binding S4 domain-containing protein	SH01_07875, ,psos,RNA-binding S4 domain-containing protein	SH02_04515, ,psos,RNA-binding S4 domain-containing protein	SH03_01430, ,psos,RNA-binding S4 domain-containing protein	TP1_02450, ,psos,RNA-binding S4 domain-containing protein	TP2_08315, ,psos,RNA-binding S4 domain-containing protein	TP3_04255, ,psos,RNA-binding S4 domain-containing protein	TP4_00390, ,psos,RNA-binding S4 domain-containing protein	TP4479_10600, ,psos,RNA-binding S4 domain-containing protein	TP8_06635, ,psos,RNA-binding S4 domain-containing protein	TP_2849_01655, ,psos,RNA-binding S4 domain-containing protein	UFV1_04815, ,psos,RNA-binding S4 domain-containing protein	jx18_02175, ,psos,RNA-binding S4 domain-containing protein
301	TP6375_01570, ,psos,DNA polymerase III subunit alpha	2012CQ_ZSH_09155, ,psos,DNA polymerase III subunit alpha	Arash114_01570, ,psos,DNA polymerase III subunit alpha	Bu5_04385, ,psos,DNA polymerase III subunit alpha	DSM_20630_03720, ,psos,DNA polymerase III subunit alpha	MS249_01230, ,psos,DNA polymerase III subunit alpha	NCTC5224_06115, ,psos,DNA polymerase III subunit alpha	SH01_07870, ,psos,DNA polymerase III subunit alpha	SH02_04520, ,psos,DNA polymerase III subunit alpha	SH03_01435, ,psos,DNA polymerase III subunit alpha	TP1_02445, ,psos,DNA polymerase III subunit alpha	TP2_08310, ,psos,DNA polymerase III subunit alpha	TP3_04260, ,psos,DNA polymerase III subunit alpha	TP4_00385, ,psos,DNA polymerase III subunit alpha	TP4479_10605, ,psos,DNA polymerase III subunit alpha	TP8_06640, ,psos,DNA polymerase III subunit alpha	TP_2849_01660, ,psos,DNA polymerase III subunit alpha	UFV1_04820, ,psos,DNA polymerase III subunit alpha	jx18_02170, ,psos,DNA polymerase III subunit alpha
302	TP6375_01575, ,psos,GNAT family N-acetyltransferase	2012CQ_ZSH_09160, ,psos,GNAT family N-acetyltransferase	Arash114_01575, ,psos,GNAT family N-acetyltransferase	Bu5_04380, ,psos,GNAT family N-acetyltransferase	DSM_20630_03725, ,psos,GNAT family N-acetyltransferase	MS249_01235, ,psos,GNAT family N-acetyltransferase	NCTC5224_06120, ,psos,GNAT family N-acetyltransferase	SH01_07865, ,psos,GNAT family N-acetyltransferase	SH02_04525, ,psos,GNAT family N-acetyltransferase	SH03_01440, ,psos,GNAT family N-acetyltransferase	TP1_02440, ,psos,GNAT family N-acetyltransferase	TP2_08305, ,psos,GNAT family N-acetyltransferase	TP3_04265, ,psos,GNAT family N-acetyltransferase	TP4_00380, ,psos,GNAT family N-acetyltransferase	TP4479_10610, ,psos,GNAT family N-acetyltransferase	TP8_06645, ,psos,GNAT family N-acetyltransferase	TP_2849_01665, ,psos,GNAT family N-acetyltransferase	UFV1_04825, ,psos,GNAT family N-acetyltransferase	jx18_02165, ,psos,GNAT family N-acetyltransferase
303	TP6375_01580, ,psos,Pseudouridine synthase	2012CQ_ZSH_09165, ,psos,Pseudouridine synthase	Arash114_01580, ,psos,Pseudouridine synthase	Bu5_04375, ,psos,Pseudouridine synthase	DSM_20630_03730, ,psos,Pseudouridine synthase	MS249_01240, ,psos,Pseudouridine synthase	NCTC5224_06125, ,psos,Pseudouridine synthase	SH01_07860, ,psos,Pseudouridine synthase	SH02_04530, ,psos,Pseudouridine synthase	SH03_01445, ,psos,Pseudouridine synthase	TP1_02435, ,psos,Pseudouridine synthase	TP2_08300, ,psos,Pseudouridine synthase	TP3_04270, ,psos,Pseudouridine synthase	TP4_00375, ,psos,Pseudouridine synthase	TP4479_10615, ,psos,Pseudouridine synthase	TP8_06650, ,psos,Pseudouridine synthase	TP_2849_01670, ,psos,Pseudouridine synthase	UFV1_04830, ,psos,Pseudouridine synthase	jx18_02160, ,psos,Pseudouridine synthase
304	TP6375_01585, ,psos,Lipoprotein signal peptidase	2012CQ_ZSH_09170, ,psos,Lipoprotein signal peptidase	Arash114_01585, ,psos,Lipoprotein signal peptidase	Bu5_04370, ,psos,Lipoprotein signal peptidase	DSM_20630_03735, ,psos,Lipoprotein signal peptidase	MS249_01245, ,psos,Lipoprotein signal peptidase	NCTC5224_06130, ,psos,Lipoprotein signal peptidase	SH01_07855, ,psos,Lipoprotein signal peptidase	SH02_04535, ,psos,Lipoprotein signal peptidase	SH03_01450, ,psos,Lipoprotein signal peptidase	TP1_02430, ,psos,Lipoprotein signal peptidase	TP2_08295, ,psos,Lipoprotein signal peptidase	TP3_04275, ,psos,Lipoprotein signal peptidase	TP4_00370, ,psos,Lipoprotein signal peptidase	TP4479_10620, ,psos,Lipoprotein signal peptidase	TP8_06655, ,psos,Lipoprotein signal peptidase	TP_2849_01675, ,psos,Lipoprotein signal peptidase	UFV1_04835, ,psos,Lipoprotein signal peptidase	jx18_02155, ,psos,Lipoprotein signal peptidase
305	TP6375_01590, ,psos,Antigen 84	2012CQ_ZSH_09175, ,psos,Antigen 84	Arash114_01590, ,psos,Antigen 84	Bu5_04365, ,psos,Antigen 84	DSM_20630_03740, ,psos,Antigen 84	MS249_01250, ,psos,Antigen 84	NCTC5224_06135, ,psos,Antigen 84	SH01_07850, ,psos,Antigen 84	SH02_04540, ,psos,Antigen 84	SH03_01455, ,psos,Antigen 84	TP1_02425, ,psos,Antigen 84	TP2_08290, ,psos,Antigen 84	TP3_04280, ,psos,Antigen 84	TP4_00365, ,psos,Antigen 84	TP4479_10625, ,psos,Antigen 84	TP8_06660, ,psos,Antigen 84	TP_2849_01680, ,psos,Antigen 84	UFV1_04840, ,psos,Antigen 84	jx18_02150, ,psos,Antigen 84
306	TP6375_01595, ,psos,YggT family protein	2012CQ_ZSH_09180, ,psos,YggT family protein	Arash114_01595, ,psos,YggT family protein	Bu5_04360, ,psos,YggT family protein	DSM_20630_03745, ,psos,YggT family protein	MS249_01255, ,psos,YggT family protein	NCTC5224_06140, ,psos,YggT family protein	SH01_07845, ,psos,YggT family protein	SH02_04545, ,psos,YggT family protein	SH03_01460, ,psos,YggT family protein	TP1_02420, ,psos,YggT family protein	TP2_08285, ,psos,YggT family protein	TP3_04285, ,psos,YggT family protein	TP4_00360, ,psos,YggT family protein	TP4479_10630, ,psos,YggT family protein	TP8_06665, ,psos,YggT family protein	TP_2849_01685, ,psos,YggT family protein	UFV1_04845, ,psos,YggT family protein	jx18_02145, ,psos,YggT family protein
307	TP6375_01600, ,psos,Cell division protein SepF	2012CQ_ZSH_09185, ,psos,Cell division protein SepF	Arash114_01600, ,psos,Cell division protein SepF	Bu5_04355, ,psos,Cell division protein SepF	DSM_20630_03750, ,psos,Cell division protein SepF	MS249_01260, ,psos,Cell division protein SepF	NCTC5224_06145, ,psos,Cell division protein SepF	SH01_07840, ,psos,Cell division protein SepF	SH02_04550, ,psos,Cell division protein SepF	SH03_01465, ,psos,Cell division protein SepF	TP1_02415, ,psos,Cell division protein SepF	TP2_08280, ,psos,Cell division protein SepF	TP3_04290, ,psos,Cell division protein SepF	TP4_00355, ,psos,Cell division protein SepF	TP4479_10635, ,psos,Cell division protein SepF	TP8_06670, ,psos,Cell division protein SepF	TP_2849_01690, ,psos,Cell division protein SepF	UFV1_04850, ,psos,Cell division protein SepF	jx18_02140, ,psos,Cell division protein SepF
308	TP6375_01605, ,psos,Laccase domain protein yfiH	2012CQ_ZSH_09190, ,psos,Laccase domain protein yfiH	Arash114_01605, ,psos,Laccase domain protein yfiH	Bu5_04350, ,psos,Laccase domain protein yfiH	DSM_20630_03755, ,psos,Laccase domain protein yfiH	MS249_01265, ,psos,Laccase domain protein yfiH	NCTC5224_06150, ,psos,Laccase domain protein yfiH	SH01_07835, ,psos,Laccase domain protein yfiH	SH02_04555, ,psos,Laccase domain protein yfiH	SH03_01470, ,psos,Laccase domain protein yfiH	TP1_02410, ,psos,Laccase domain protein yfiH	TP2_08275, ,psos,Laccase domain protein yfiH	TP3_04295, ,psos,Laccase domain protein yfiH	TP4_00350, ,psos,Laccase domain protein yfiH	TP4479_10640, ,psos,Laccase domain protein yfiH	TP8_06675, ,psos,Laccase domain protein yfiH	TP_2849_01695, ,psos,Laccase domain protein yfiH	UFV1_04855, ,psos,Laccase domain protein yfiH	jx18_02135, ,psos,Laccase domain protein yfiH
309	TP6375_01610, ,psos,Cell division protein FtsZ	2012CQ_ZSH_09195, ,psos,Cell division protein FtsZ	Arash114_01610, ,psos,Cell division protein FtsZ	Bu5_04345, ,psos,Cell division protein FtsZ	DSM_20630_03760, ,psos,Cell division protein FtsZ	MS249_01270, ,psos,Cell division protein FtsZ	NCTC5224_06155, ,psos,Cell division protein FtsZ	SH01_07830, ,psos,Cell division protein FtsZ	SH02_04560, ,psos,Cell division protein FtsZ	SH03_01475, ,psos,Cell division protein FtsZ	TP1_02405, ,psos,Cell division protein FtsZ	TP2_08270, ,psos,Cell division protein FtsZ	TP3_04300, ,psos,Cell division protein FtsZ	TP4_00345, ,psos,Cell division protein FtsZ	TP4479_10645, ,psos,Cell division protein FtsZ	TP8_06680, ,psos,Cell division protein FtsZ	TP_2849_01700, ,psos,Cell division protein FtsZ	UFV1_04860, ,psos,Cell division protein FtsZ	jx18_02130, ,psos,Cell division protein FtsZ
310	TP6375_01615, ,psos,POTRA_1 domain-containing protein	2012CQ_ZSH_09200, ,psos,POTRA_1 domain-containing protein	Arash114_01615, ,psos,POTRA_1 domain-containing protein	Bu5_04340, ,psos,POTRA_1 domain-containing protein	DSM_20630_03765, ,psos,POTRA_1 domain-containing protein	MS249_01275, ,psos,POTRA_1 domain-containing protein	NCTC5224_06160, ,psos,POTRA_1 domain-containing protein	SH01_07825, ,psos,POTRA_1 domain-containing protein	SH02_04565, ,psos,POTRA_1 domain-containing protein	SH03_01480, ,psos,POTRA_1 domain-containing protein	TP1_02400, ,psos,POTRA_1 domain-containing protein	TP2_08265, ,psos,POTRA_1 domain-containing protein	TP3_04305, ,psos,POTRA_1 domain-containing protein	TP4_00340, ,psos,POTRA_1 domain-containing protein	TP4479_10650, ,psos,POTRA_1 domain-containing protein	TP8_06685, ,psos,POTRA_1 domain-containing protein	TP_2849_01705, ,psos,POTRA_1 domain-containing protein	UFV1_04865, ,psos,POTRA_1 domain-containing protein	jx18_02125, ,psos,POTRA_1 domain-containing protein
311	TP6375_01620, ,psos,UDP-N-acetylmuramate--L-alanine ligase	2012CQ_ZSH_09205, ,psos,UDP-N-acetylmuramate--L-alanine ligase	Arash114_01620, ,psos,UDP-N-acetylmuramate--L-alanine ligase	Bu5_04335, ,psos,UDP-N-acetylmuramate--L-alanine ligase	DSM_20630_03770, ,psos,UDP-N-acetylmuramate--L-alanine ligase	MS249_01280, ,psos,UDP-N-acetylmuramate--L-alanine ligase	NCTC5224_06165, ,psos,UDP-N-acetylmuramate--L-alanine ligase	SH01_07820, ,psos,UDP-N-acetylmuramate--L-alanine ligase	SH02_04570, ,psos,UDP-N-acetylmuramate--L-alanine ligase	SH03_01485, ,psos,UDP-N-acetylmuramate--L-alanine ligase	TP1_02395, ,psos,UDP-N-acetylmuramate--L-alanine ligase	TP2_08260, ,psos,UDP-N-acetylmuramate--L-alanine ligase	TP3_04310, ,psos,UDP-N-acetylmuramate--L-alanine ligase	TP4_00335, ,psos,UDP-N-acetylmuramate--L-alanine ligase	TP4479_10655, ,psos,UDP-N-acetylmuramate--L-alanine ligase	TP8_06690, ,psos,UDP-N-acetylmuramate--L-alanine ligase	TP_2849_01710, ,psos,UDP-N-acetylmuramate--L-alanine ligase	UFV1_04870, ,psos,UDP-N-acetylmuramate--L-alanine ligase	jx18_02120, ,psos,UDP-N-acetylmuramate--L-alanine ligase
312	TP6375_01625, ,psos,UDP-N-acetylglucosamine--N-acetylmuramyl- (pentape ptide) pyrophosphoryl-undecaprenol N-acetylglucosamine transferase	2012CQ_ZSH_09210, ,psos,UDP-N-acetylglucosamine--N-acetylmuramyl- (pentape ptide) pyrophosphoryl-undecaprenol N-acetylglucosamine transferase	Arash114_01625, ,psos,UDP-N-acetylglucosamine--N-acetylmuramyl- (pentape ptide) pyrophosphoryl-undecaprenol N-acetylglucosamine transferase	Bu5_04330, ,psos,UDP-N-acetylglucosamine--N-acetylmuramyl- (pentape ptide) pyrophosphoryl-undecaprenol N-acetylglucosamine transferase	DSM_20630_03775, ,psos,UDP-N-acetylglucosamine--N-acetylmuramyl- (pentape ptide) pyrophosphoryl-undecaprenol N-acetylglucosamine transferase	MS249_01285, ,psos,UDP-N-acetylglucosamine--N-acetylmuramyl- (pentape ptide) pyrophosphoryl-undecaprenol N-acetylglucosamine transferase	NCTC5224_06170, ,psos,UDP-N-acetylglucosamine--N-acetylmuramyl- (pentape ptide) pyrophosphoryl-undecaprenol N-acetylglucosamine transferase	SH01_07815, ,psos,UDP-N-acetylglucosamine--N-acetylmuramyl- (pentape ptide) pyrophosphoryl-undecaprenol N-acetylglucosamine transferase	SH02_04575, ,psos,UDP-N-acetylglucosamine--N-acetylmuramyl- (pentape ptide) pyrophosphoryl-undecaprenol N-acetylglucosamine transferase	SH03_01490, ,psos,UDP-N-acetylglucosamine--N-acetylmuramyl- (pentape ptide) pyrophosphoryl-undecaprenol N-acetylglucosamine transferase	TP1_02390, ,psos,UDP-N-acetylglucosamine--N-acetylmuramyl- (pentape ptide) pyrophosphoryl-undecaprenol N-acetylglucosamine transferase	TP2_08255, ,psos,UDP-N-acetylglucosamine--N-acetylmuramyl- (pentape ptide) pyrophosphoryl-undecaprenol N-acetylglucosamine transferase	TP3_04315, ,psos,UDP-N-acetylglucosamine--N-acetylmuramyl- (pentape ptide) pyrophosphoryl-undecaprenol N-acetylglucosamine transferase	TP4_00330, ,psos,UDP-N-acetylglucosamine--N-acetylmuramyl- (pentape ptide) pyrophosphoryl-undecaprenol N-acetylglucosamine transferase	TP4479_10660, ,psos,UDP-N-acetylglucosamine--N-acetylmuramyl- (pentape ptide) pyrophosphoryl-undecaprenol N-acetylglucosamine transferase	TP8_06695, ,psos,UDP-N-acetylglucosamine--N-acetylmuramyl- (pentape ptide) pyrophosphoryl-undecaprenol N-acetylglucosamine transferase	TP_2849_01715, ,psos,UDP-N-acetylglucosamine--N-acetylmuramyl- (pentape ptide) pyrophosphoryl-undecaprenol N-acetylglucosamine transferase	UFV1_04875, ,psos,UDP-N-acetylglucosamine--N-acetylmuramyl- (pentape ptide) pyrophosphoryl-undecaprenol N-acetylglucosamine transferase	jx18_02115, ,psos,UDP-N-acetylglucosamine--N-acetylmuramyl- (pentape ptide) pyrophosphoryl-undecaprenol N-acetylglucosamine transferase
313	TP6375_01630, ,psos,Cell division protein FtsW	2012CQ_ZSH_09215, ,psos,Cell division protein FtsW	Arash114_01630, ,psos,Cell division protein FtsW	Bu5_04325, ,psos,Cell division protein FtsW	DSM_20630_03780, ,psos,Cell division protein FtsW	MS249_01290, ,psos,Cell division protein FtsW	NCTC5224_06175, ,psos,Cell division protein FtsW	SH01_07810, ,psos,Cell division protein FtsW	SH02_04580, ,psos,Cell division protein FtsW	SH03_01495, ,psos,Cell division protein FtsW	TP1_02385, ,psos,Cell division protein FtsW	TP2_08250, ,psos,Cell division protein FtsW	TP3_04320, ,psos,Cell division protein FtsW	TP4_00325, ,psos,Cell division protein FtsW	TP4479_10665, ,psos,Cell division protein FtsW	TP8_06700, ,psos,Cell division protein FtsW	TP_2849_01720, ,psos,Cell division protein FtsW	UFV1_04880, ,psos,Cell division protein FtsW	jx18_02110, ,psos,Cell division protein FtsW
314	TP6375_01635, ,psos,UDP-N-acetylmuramoylalanine--D-glutamate ligase	2012CQ_ZSH_09220, ,psos,UDP-N-acetylmuramoylalanine--D-glutamate ligase	Arash114_01635, ,psos,UDP-N-acetylmuramoylalanine--D-glutamate ligase	Bu5_04320, ,psos,UDP-N-acetylmuramoylalanine--D-glutamate ligase	DSM_20630_03785, ,psos,UDP-N-acetylmuramoylalanine--D-glutamate ligase	MS249_01295, ,psos,UDP-N-acetylmuramoylalanine--D-glutamate ligase	NCTC5224_06180, ,psos,UDP-N-acetylmuramoylalanine--D-glutamate ligase	SH01_07805, ,psos,UDP-N-acetylmuramoylalanine--D-glutamate ligase	SH02_04585, ,psos,UDP-N-acetylmuramoylalanine--D-glutamate ligase	SH03_01500, ,psos,UDP-N-acetylmuramoylalanine--D-glutamate ligase	TP1_02380, ,psos,UDP-N-acetylmuramoylalanine--D-glutamate ligase	TP2_08245, ,psos,UDP-N-acetylmuramoylalanine--D-glutamate ligase	TP3_04325, ,psos,UDP-N-acetylmuramoylalanine--D-glutamate ligase	TP4_00320, ,psos,UDP-N-acetylmuramoylalanine--D-glutamate ligase	TP4479_10670, ,psos,UDP-N-acetylmuramoylalanine--D-glutamate ligase	TP8_06705, ,psos,UDP-N-acetylmuramoylalanine--D-glutamate ligase	TP_2849_01725, ,psos,UDP-N-acetylmuramoylalanine--D-glutamate ligase	UFV1_04885, ,psos,UDP-N-acetylmuramoylalanine--D-glutamate ligase	jx18_02105, ,psos,UDP-N-acetylmuramoylalanine--D-glutamate ligase
315	TP6375_01640, ,psos,Phospho-N-acetylmuramoyl-pentapeptide- transferase	2012CQ_ZSH_09225, ,psos,Phospho-N-acetylmuramoyl-pentapeptide- transferase	Arash114_01640, ,psos,Phospho-N-acetylmuramoyl-pentapeptide- transferase	Bu5_04315, ,psos,Phospho-N-acetylmuramoyl-pentapeptide- transferase	DSM_20630_03790, ,psos,Phospho-N-acetylmuramoyl-pentapeptide- transferase	MS249_01300, ,psos,Phospho-N-acetylmuramoyl-pentapeptide- transferase	NCTC5224_06185, ,psos,Phospho-N-acetylmuramoyl-pentapeptide- transferase	SH01_07800, ,psos,Phospho-N-acetylmuramoyl-pentapeptide- transferase	SH02_04590, ,psos,Phospho-N-acetylmuramoyl-pentapeptide- transferase	SH03_01505, ,psos,Phospho-N-acetylmuramoyl-pentapeptide- transferase	TP1_02375, ,psos,Phospho-N-acetylmuramoyl-pentapeptide- transferase	TP2_08240, ,psos,Phospho-N-acetylmuramoyl-pentapeptide- transferase	TP3_04330, ,psos,Phospho-N-acetylmuramoyl-pentapeptide- transferase	TP4_00315, ,psos,Phospho-N-acetylmuramoyl-pentapeptide- transferase	TP4479_10675, ,psos,Phospho-N-acetylmuramoyl-pentapeptide- transferase	TP8_06710, ,psos,Phospho-N-acetylmuramoyl-pentapeptide- transferase	TP_2849_01730, ,psos,Phospho-N-acetylmuramoyl-pentapeptide- transferase	UFV1_04890, ,psos,Phospho-N-acetylmuramoyl-pentapeptide- transferase	jx18_02100, ,psos,Phospho-N-acetylmuramoyl-pentapeptide- transferase
316	TP6375_01645, ,psos,UDP-N-acetylmuramoyl-tripeptide--D-alanyl-D- alani ne ligase	2012CQ_ZSH_09230, ,psos,UDP-N-acetylmuramoyl-tripeptide--D-alanyl-D- alani ne ligase	Arash114_01645, ,psos,UDP-N-acetylmuramoyl-tripeptide--D-alanyl-D- alani ne ligase	Bu5_04310, ,psos,UDP-N-acetylmuramoyl-tripeptide--D-alanyl-D- alani ne ligase	DSM_20630_03795, ,psos,UDP-N-acetylmuramoyl-tripeptide--D-alanyl-D- alani ne ligase	MS249_01305, ,psos,UDP-N-acetylmuramoyl-tripeptide--D-alanyl-D- alani ne ligase	NCTC5224_06190, ,psos,UDP-N-acetylmuramoyl-tripeptide--D-alanyl-D- alani ne ligase	SH01_07795, ,psos,UDP-N-acetylmuramoyl-tripeptide--D-alanyl-D- alani ne ligase	SH02_04595, ,psos,UDP-N-acetylmuramoyl-tripeptide--D-alanyl-D- alani ne ligase	SH03_01510, ,psos,UDP-N-acetylmuramoyl-tripeptide--D-alanyl-D- alani ne ligase	TP1_02370, ,psos,UDP-N-acetylmuramoyl-tripeptide--D-alanyl-D- alani ne ligase	TP2_08235, ,psos,UDP-N-acetylmuramoyl-tripeptide--D-alanyl-D- alani ne ligase	TP3_04335, ,psos,UDP-N-acetylmuramoyl-tripeptide--D-alanyl-D- alani ne ligase	TP4_00310, ,psos,UDP-N-acetylmuramoyl-tripeptide--D-alanyl-D- alani ne ligase	TP4479_10680, ,psos,UDP-N-acetylmuramoyl-tripeptide--D-alanyl-D- alani ne ligase	TP8_06715, ,psos,UDP-N-acetylmuramoyl-tripeptide--D-alanyl-D- alani ne ligase	TP_2849_01735, ,psos,UDP-N-acetylmuramoyl-tripeptide--D-alanyl-D- alani ne ligase	UFV1_04895, ,psos,UDP-N-acetylmuramoyl-tripeptide--D-alanyl-D- alani ne ligase	jx18_02095, ,psos,UDP-N-acetylmuramoyl-tripeptide--D-alanyl-D- alani ne ligase
317	TP6375_01650, ,psos,UDP-N-acetylmuramyl-tripeptide synthetase	2012CQ_ZSH_09235, ,psos,UDP-N-acetylmuramyl-tripeptide synthetase	Arash114_01650, ,psos,UDP-N-acetylmuramyl-tripeptide synthetase	Bu5_04305, ,psos,UDP-N-acetylmuramyl-tripeptide synthetase	DSM_20630_03800, ,psos,UDP-N-acetylmuramyl-tripeptide synthetase	MS249_01310, ,psos,UDP-N-acetylmuramyl-tripeptide synthetase	NCTC5224_06195, ,psos,UDP-N-acetylmuramyl-tripeptide synthetase	SH01_07790, ,psos,UDP-N-acetylmuramyl-tripeptide synthetase	SH02_04600, ,psos,UDP-N-acetylmuramyl-tripeptide synthetase	SH03_01515, ,psos,UDP-N-acetylmuramyl-tripeptide synthetase	TP1_02365, ,psos,UDP-N-acetylmuramyl-tripeptide synthetase	TP2_08230, ,psos,UDP-N-acetylmuramyl-tripeptide synthetase	TP3_04340, ,psos,UDP-N-acetylmuramyl-tripeptide synthetase	TP4_00305, ,psos,UDP-N-acetylmuramyl-tripeptide synthetase	TP4479_10685, ,psos,UDP-N-acetylmuramyl-tripeptide synthetase	TP8_06720, ,psos,UDP-N-acetylmuramyl-tripeptide synthetase	TP_2849_01740, ,psos,UDP-N-acetylmuramyl-tripeptide synthetase	UFV1_04900, ,psos,UDP-N-acetylmuramyl-tripeptide synthetase	jx18_02090, ,psos,UDP-N-acetylmuramyl-tripeptide synthetase
318	TP6375_01655, ,psos,Peptidoglycan synthase FtsI	2012CQ_ZSH_09240, ,psos,Peptidoglycan synthase FtsI	Arash114_01655, ,psos,Peptidoglycan synthase FtsI	Bu5_04300, ,psos,Peptidoglycan synthase FtsI	DSM_20630_03805, ,psos,Peptidoglycan synthase FtsI	MS249_01315, ,psos,Peptidoglycan synthase FtsI	NCTC5224_06200, ,psos,Peptidoglycan synthase FtsI	SH01_07785, ,psos,Peptidoglycan synthase FtsI	SH02_04605, ,psos,Peptidoglycan synthase FtsI	SH03_01520, ,psos,Peptidoglycan synthase FtsI	TP1_02360, ,psos,Peptidoglycan synthase FtsI	TP2_08225, ,psos,Peptidoglycan synthase FtsI	TP3_04345, ,psos,Peptidoglycan synthase FtsI	TP4_00300, ,psos,Peptidoglycan synthase FtsI	TP4479_10690, ,psos,Peptidoglycan synthase FtsI	TP8_06725, ,psos,Peptidoglycan synthase FtsI	TP_2849_01745, ,psos,Peptidoglycan synthase FtsI	UFV1_04905, ,psos,Peptidoglycan synthase FtsI	jx18_02085, ,psos,Peptidoglycan synthase FtsI
319	TP6375_01660, ,psos,hypothetical protein	2012CQ_ZSH_09245, ,psos,hypothetical protein	Arash114_01660, ,psos,hypothetical protein	Bu5_04295, ,psos,hypothetical protein	DSM_20630_03810, ,psos,hypothetical protein	MS249_01320, ,psos,hypothetical protein	NCTC5224_06205, ,psos,hypothetical protein	SH01_07780, ,psos,hypothetical protein	SH02_04610, ,psos,hypothetical protein	SH03_01525, ,psos,hypothetical protein	TP1_02355, ,psos,hypothetical protein	TP2_08220, ,psos,hypothetical protein	TP3_04350, ,psos,hypothetical protein	TP4_00295, ,psos,hypothetical protein	TP4479_10695, ,psos,hypothetical protein	TP8_06730, ,psos,hypothetical protein	TP_2849_01750, ,psos,hypothetical protein	UFV1_04910, ,psos,hypothetical protein	jx18_02080, ,psos,hypothetical protein
320	TP6375_01665, ,psos,Ribosomal RNA small subunit methyltransferase H	2012CQ_ZSH_09250, ,psos,Ribosomal RNA small subunit methyltransferase H	Arash114_01665, ,psos,Ribosomal RNA small subunit methyltransferase H	Bu5_04290, ,psos,Ribosomal RNA small subunit methyltransferase H	DSM_20630_03815, ,psos,Ribosomal RNA small subunit methyltransferase H	MS249_01325, ,psos,Ribosomal RNA small subunit methyltransferase H	NCTC5224_06210, ,psos,Ribosomal RNA small subunit methyltransferase H	SH01_07775, ,psos,Ribosomal RNA small subunit methyltransferase H	SH02_04615, ,psos,Ribosomal RNA small subunit methyltransferase H	SH03_01530, ,psos,Ribosomal RNA small subunit methyltransferase H	TP1_02350, ,psos,Ribosomal RNA small subunit methyltransferase H	TP2_08215, ,psos,Ribosomal RNA small subunit methyltransferase H	TP3_04355, ,psos,Ribosomal RNA small subunit methyltransferase H	TP4_00290, ,psos,Ribosomal RNA small subunit methyltransferase H	TP4479_10700, ,psos,Ribosomal RNA small subunit methyltransferase H	TP8_06735, ,psos,Ribosomal RNA small subunit methyltransferase H	TP_2849_01755, ,psos,Ribosomal RNA small subunit methyltransferase H	UFV1_04915, ,psos,Ribosomal RNA small subunit methyltransferase H	jx18_02075, ,psos,Ribosomal RNA small subunit methyltransferase H
321	TP6375_01670, ,psos,Transcriptional regulator MraZ	2012CQ_ZSH_09255, ,psos,Transcriptional regulator MraZ	Arash114_01670, ,psos,Transcriptional regulator MraZ	Bu5_04285, ,psos,Transcriptional regulator MraZ	DSM_20630_03820, ,psos,Transcriptional regulator MraZ	MS249_01330, ,psos,Transcriptional regulator MraZ	NCTC5224_06215, ,psos,Transcriptional regulator MraZ	SH01_07770, ,psos,Transcriptional regulator MraZ	SH02_04620, ,psos,Transcriptional regulator MraZ	SH03_01535, ,psos,Transcriptional regulator MraZ	TP1_02345, ,psos,Transcriptional regulator MraZ	TP2_08210, ,psos,Transcriptional regulator MraZ	TP3_04360, ,psos,Transcriptional regulator MraZ	TP4_00285, ,psos,Transcriptional regulator MraZ	TP4479_10705, ,psos,Transcriptional regulator MraZ	TP8_06740, ,psos,Transcriptional regulator MraZ	TP_2849_01760, ,psos,Transcriptional regulator MraZ	UFV1_04920, ,psos,Transcriptional regulator MraZ	jx18_02070, ,psos,Transcriptional regulator MraZ
322	TP6375_01675, ,psos,Protein of uncharacterized function (DUF3040)	2012CQ_ZSH_09260, ,psos,Protein of uncharacterized function (DUF3040)	Arash114_01675, ,psos,Protein of uncharacterized function (DUF3040)	Bu5_04280, ,psos,Protein of uncharacterized function (DUF3040)	DSM_20630_03825, ,psos,Protein of uncharacterized function (DUF3040)	MS249_01335, ,psos,Protein of uncharacterized function (DUF3040)	NCTC5224_06220, ,psos,Protein of uncharacterized function (DUF3040)	SH01_07765, ,psos,Protein of uncharacterized function (DUF3040)	SH02_04625, ,psos,Protein of uncharacterized function (DUF3040)	SH03_01540, ,psos,Protein of uncharacterized function (DUF3040)	TP1_02340, ,psos,Protein of uncharacterized function (DUF3040)	TP2_08205, ,psos,Protein of uncharacterized function (DUF3040)	TP3_04365, ,psos,Protein of uncharacterized function (DUF3040)	TP4_00280, ,psos,Protein of uncharacterized function (DUF3040)	TP4479_10710, ,psos,Protein of uncharacterized function (DUF3040)	TP8_06745, ,psos,Protein of uncharacterized function (DUF3040)	TP_2849_01765, ,psos,Protein of uncharacterized function (DUF3040)	UFV1_04925, ,psos,Protein of uncharacterized function (DUF3040)	jx18_02065, ,psos,Protein of uncharacterized function (DUF3040)
323	TP6375_01680, ,psos,DNA polymerase IV	2012CQ_ZSH_09265, ,psos,DNA polymerase IV	Arash114_01680, ,psos,DNA polymerase IV	Bu5_04275, ,psos,DNA polymerase IV	DSM_20630_03830, ,psos,DNA polymerase IV	MS249_01340, ,psos,DNA polymerase IV	NCTC5224_06225, ,psos,DNA polymerase IV	SH01_07760, ,psos,DNA polymerase IV	SH02_04630, ,psos,DNA polymerase IV	SH03_01545, ,psos,DNA polymerase IV	TP1_02335, ,psos,DNA polymerase IV	TP2_08200, ,psos,DNA polymerase IV	TP3_04370, ,psos,DNA polymerase IV	TP4_00275, ,psos,DNA polymerase IV	TP4479_10715, ,psos,DNA polymerase IV	TP8_06750, ,psos,DNA polymerase IV	TP_2849_01770, ,psos,DNA polymerase IV	UFV1_04930, ,psos,DNA polymerase IV	jx18_02060, ,psos,DNA polymerase IV
324	TP6375_01685, ,psos,Spermidine synthase	2012CQ_ZSH_09270, ,psos,Spermidine synthase	Arash114_01685, ,psos,Spermidine synthase	Bu5_04270, ,psos,Spermidine synthase	DSM_20630_03835, ,psos,Spermidine synthase	MS249_01345, ,psos,Spermidine synthase	NCTC5224_06230, ,psos,Spermidine synthase	SH01_07755, ,psos,Spermidine synthase	SH02_04635, ,psos,Spermidine synthase	SH03_01550, ,psos,Spermidine synthase	TP1_02330, ,psos,Spermidine synthase	TP2_08195, ,psos,Spermidine synthase	TP3_04375, ,psos,Spermidine synthase	TP4_00270, ,psos,Spermidine synthase	TP4479_10720, ,psos,Spermidine synthase	TP8_06755, ,psos,Spermidine synthase	TP_2849_01775, ,psos,Spermidine synthase	UFV1_04935, ,psos,Spermidine synthase	jx18_02055, ,psos,Spermidine synthase
325	TP6375_01690, ,psos,PAC2 family protein	2012CQ_ZSH_09275, ,psos,PAC2 family protein	Arash114_01690, ,psos,PAC2 family protein	Bu5_04265, ,psos,PAC2 family protein	DSM_20630_03840, ,psos,PAC2 family protein	MS249_01350, ,psos,PAC2 family protein	NCTC5224_06235, ,psos,PAC2 family protein	SH01_07750, ,psos,PAC2 family protein	SH02_04640, ,psos,PAC2 family protein	SH03_01555, ,psos,PAC2 family protein	TP1_02325, ,psos,PAC2 family protein	TP2_08190, ,psos,PAC2 family protein	TP3_04380, ,psos,PAC2 family protein	TP4_00265, ,psos,PAC2 family protein	TP4479_10725, ,psos,PAC2 family protein	TP8_06760, ,psos,PAC2 family protein	TP_2849_01780, ,psos,PAC2 family protein	UFV1_04940, ,psos,PAC2 family protein	jx18_02050, ,psos,PAC2 family protein
326	TP6375_01695, ,psos,DNA helicase	2012CQ_ZSH_09280, ,psos,DNA helicase	Arash114_01695, ,psos,DNA helicase	Bu5_04260, ,psos,DNA helicase	DSM_20630_03845, ,psos,DNA helicase	MS249_01355, ,psos,DNA helicase	NCTC5224_06240, ,psos,DNA helicase	SH01_07745, ,psos,DNA helicase	SH02_04645, ,psos,DNA helicase	SH03_01560, ,psos,DNA helicase	TP1_02320, ,psos,DNA helicase	TP2_08185, ,psos,DNA helicase	TP3_04385, ,psos,DNA helicase	TP4_00260, ,psos,DNA helicase	TP4479_10730, ,psos,DNA helicase	TP8_06765, ,psos,DNA helicase	TP_2849_01785, ,psos,DNA helicase	UFV1_04945, ,psos,DNA helicase	jx18_02045, ,psos,DNA helicase
327	TP6375_01700, ,psos,D-3-phosphoglycerate dehydrogenase	2012CQ_ZSH_09285, ,psos,D-3-phosphoglycerate dehydrogenase	Arash114_01700, ,psos,D-3-phosphoglycerate dehydrogenase	Bu5_04255, ,psos,D-3-phosphoglycerate dehydrogenase	DSM_20630_03850, ,psos,D-3-phosphoglycerate dehydrogenase	MS249_01360, ,psos,D-3-phosphoglycerate dehydrogenase	NCTC5224_06245, ,psos,D-3-phosphoglycerate dehydrogenase	SH01_07740, ,psos,D-3-phosphoglycerate dehydrogenase	SH02_04650, ,psos,D-3-phosphoglycerate dehydrogenase	SH03_01565, ,psos,D-3-phosphoglycerate dehydrogenase	TP1_02315, ,psos,D-3-phosphoglycerate dehydrogenase	TP2_08180, ,psos,D-3-phosphoglycerate dehydrogenase	TP3_04390, ,psos,D-3-phosphoglycerate dehydrogenase	TP4_00255, ,psos,D-3-phosphoglycerate dehydrogenase	TP4479_10735, ,psos,D-3-phosphoglycerate dehydrogenase	TP8_06770, ,psos,D-3-phosphoglycerate dehydrogenase	TP_2849_01790, ,psos,D-3-phosphoglycerate dehydrogenase	UFV1_04950, ,psos,D-3-phosphoglycerate dehydrogenase	jx18_02040, ,psos,D-3-phosphoglycerate dehydrogenase
328	TP6375_01705, ,psos,Long-chain fatty acid--CoA ligase	2012CQ_ZSH_09290, ,psos,Long-chain fatty acid--CoA ligase	Arash114_01705, ,psos,Long-chain fatty acid--CoA ligase	Bu5_04250, ,psos,Long-chain fatty acid--CoA ligase	DSM_20630_03855, ,psos,Long-chain fatty acid--CoA ligase	MS249_01365, ,psos,Long-chain fatty acid--CoA ligase	NCTC5224_06250, ,psos,Long-chain fatty acid--CoA ligase	SH01_07735, ,psos,Long-chain fatty acid--CoA ligase	SH02_04655, ,psos,Long-chain fatty acid--CoA ligase	SH03_01570, ,psos,Long-chain fatty acid--CoA ligase	TP1_02310, ,psos,Long-chain fatty acid--CoA ligase	TP2_08175, ,psos,Long-chain fatty acid--CoA ligase	TP3_04395, ,psos,Long-chain fatty acid--CoA ligase	TP4_00250, ,psos,Long-chain fatty acid--CoA ligase	TP4479_10740, ,psos,Long-chain fatty acid--CoA ligase	TP8_06775, ,psos,Long-chain fatty acid--CoA ligase	TP_2849_01795, ,psos,Long-chain fatty acid--CoA ligase	UFV1_04955, ,psos,Long-chain fatty acid--CoA ligase	jx18_02035, ,psos,Long-chain fatty acid--CoA ligase
329	TP6375_01710, ,psos,Transcriptional repressor NrdR	2012CQ_ZSH_09295, ,psos,Transcriptional repressor NrdR	Arash114_01710, ,psos,Transcriptional repressor NrdR	Bu5_04245, ,psos,Transcriptional repressor NrdR	DSM_20630_03860, ,psos,Transcriptional repressor NrdR	MS249_01370, ,psos,Transcriptional repressor NrdR	NCTC5224_06255, ,psos,Transcriptional repressor NrdR	SH01_07730, ,psos,Transcriptional repressor NrdR	SH02_04660, ,psos,Transcriptional repressor NrdR	SH03_01575, ,psos,Transcriptional repressor NrdR	TP1_02305, ,psos,Transcriptional repressor NrdR	TP2_08170, ,psos,Transcriptional repressor NrdR	TP3_04400, ,psos,Transcriptional repressor NrdR	TP4_00245, ,psos,Transcriptional repressor NrdR	TP4479_10745, ,psos,Transcriptional repressor NrdR	TP8_06780, ,psos,Transcriptional repressor NrdR	TP_2849_01800, ,psos,Transcriptional repressor NrdR	UFV1_04960, ,psos,Transcriptional repressor NrdR	jx18_02030, ,psos,Transcriptional repressor NrdR
330	TP6375_01715, ,psos,LysM domain-containing protein	2012CQ_ZSH_09300, ,psos,LysM domain-containing protein	Arash114_01715, ,psos,LysM domain-containing protein	Bu5_04240, ,psos,LysM domain-containing protein	DSM_20630_03865, ,psos,LysM domain-containing protein	MS249_01375, ,psos,LysM domain-containing protein	NCTC5224_06260, ,psos,LysM domain-containing protein	SH01_07725, ,psos,LysM domain-containing protein	SH02_04665, ,psos,LysM domain-containing protein	SH03_01580, ,psos,LysM domain-containing protein	TP1_02300, ,psos,LysM domain-containing protein	TP2_08165, ,psos,LysM domain-containing protein	TP3_04405, ,psos,LysM domain-containing protein	TP4_00240, ,psos,LysM domain-containing protein	TP4479_10750, ,psos,LysM domain-containing protein	TP8_06785, ,psos,LysM domain-containing protein	TP_2849_01805, ,psos,LysM domain-containing protein	UFV1_04965, ,psos,LysM domain-containing protein	jx18_02025, ,psos,LysM domain-containing protein
331	TP6375_01720, ,psos,LexA repressor	2012CQ_ZSH_09305, ,psos,LexA repressor	Arash114_01720, ,psos,LexA repressor	Bu5_04235, ,psos,LexA repressor	DSM_20630_03870, ,psos,LexA repressor	MS249_01380, ,psos,LexA repressor	NCTC5224_06265, ,psos,LexA repressor	SH01_07720, ,psos,LexA repressor	SH02_04670, ,psos,LexA repressor	SH03_01585, ,psos,LexA repressor	TP1_02295, ,psos,LexA repressor	TP2_08160, ,psos,LexA repressor	TP3_04410, ,psos,LexA repressor	TP4_00235, ,psos,LexA repressor	TP4479_10755, ,psos,LexA repressor	TP8_06790, ,psos,LexA repressor	TP_2849_01810, ,psos,LexA repressor	UFV1_04970, ,psos,LexA repressor	jx18_02020, ,psos,LexA repressor
332	TP6375_01725, ,psos,Probable ATP-dependent helicase dinG homolog	2012CQ_ZSH_09310, ,psos,Probable ATP-dependent helicase dinG homolog	Arash114_01725, ,psos,Probable ATP-dependent helicase dinG homolog	Bu5_04230, ,psos,Probable ATP-dependent helicase dinG homolog	DSM_20630_03875, ,psos,Probable ATP-dependent helicase dinG homolog	MS249_01385, ,psos,Probable ATP-dependent helicase dinG homolog	NCTC5224_06270, ,psos,Probable ATP-dependent helicase dinG homolog	SH01_07715, ,psos,Probable ATP-dependent helicase dinG homolog	SH02_04675, ,psos,Probable ATP-dependent helicase dinG homolog	SH03_01590, ,psos,Probable ATP-dependent helicase dinG homolog	TP1_02290, ,psos,Probable ATP-dependent helicase dinG homolog	TP2_08155, ,psos,Probable ATP-dependent helicase dinG homolog	TP3_04415, ,psos,Probable ATP-dependent helicase dinG homolog	TP4_00230, ,psos,Probable ATP-dependent helicase dinG homolog	TP4479_10760, ,psos,Probable ATP-dependent helicase dinG homolog	TP8_06795, ,psos,Probable ATP-dependent helicase dinG homolog	TP_2849_01815, ,psos,Probable ATP-dependent helicase dinG homolog	UFV1_04975, ,psos,Probable ATP-dependent helicase dinG homolog	jx18_02015, ,psos,Probable ATP-dependent helicase dinG homolog
333	TP6375_01730, ,psos,GTPase HflX	2012CQ_ZSH_09315, ,psos,GTPase HflX	Arash114_01730, ,psos,GTPase HflX	Bu5_04225, ,psos,GTPase HflX	DSM_20630_03880, ,psos,GTPase HflX	MS249_01390, ,psos,GTPase HflX	NCTC5224_06275, ,psos,GTPase HflX	SH01_07710, ,psos,GTPase HflX	SH02_04680, ,psos,GTPase HflX	SH03_01595, ,psos,GTPase HflX	TP1_02285, ,psos,GTPase HflX	TP2_08150, ,psos,GTPase HflX	TP3_04420, ,psos,GTPase HflX	TP4_00225, ,psos,GTPase HflX	TP4479_10765, ,psos,GTPase HflX	TP8_06800, ,psos,GTPase HflX	TP_2849_01820, ,psos,GTPase HflX	UFV1_04980, ,psos,GTPase HflX	jx18_02010, ,psos,GTPase HflX
334	TP6375_01735, ,psos,Methyltransferase domain-containing protein	- , -	Arash114_01735, ,psos,Methyltransferase domain-containing protein	Bu5_04220, ,psos,Methyltransferase domain-containing protein	- , -	MS249_01395, ,psos,Methyltransferase domain-containing protein	- , -	- , -	SH02_04685, ,psos,Methyltransferase domain-containing protein	SH03_01600, ,psos,Methyltransferase domain-containing protein	TP1_02280, ,psos,Methyltransferase domain-containing protein	TP2_08145, ,psos,Methyltransferase domain-containing protein	TP3_04425, ,psos,Methyltransferase domain-containing protein	TP4_00220, ,psos,Methyltransferase domain-containing protein	TP4479_10770, ,psos,Methyltransferase domain-containing protein	- , -	TP_2849_01825, ,psos,Methyltransferase domain-containing protein	UFV1_04985, ,psos,Methyltransferase domain-containing protein	jx18_02005, ,psos,Methyltransferase domain-containing protein
335	TP6375_01740, ,psos,tRNA dimethylallyltransferase	2012CQ_ZSH_09330, ,psos,tRNA dimethylallyltransferase	Arash114_01740, ,psos,tRNA dimethylallyltransferase	Bu5_04215, ,psos,tRNA dimethylallyltransferase	DSM_20630_03895, ,psos,tRNA dimethylallyltransferase	MS249_01400, ,psos,tRNA dimethylallyltransferase	NCTC5224_06290, ,psos,tRNA dimethylallyltransferase	SH01_07695, ,psos,tRNA dimethylallyltransferase	SH02_04690, ,psos,tRNA dimethylallyltransferase	SH03_01605, ,psos,tRNA dimethylallyltransferase	TP1_02275, ,psos,tRNA dimethylallyltransferase	TP2_08140, ,psos,tRNA dimethylallyltransferase	TP3_04430, ,psos,tRNA dimethylallyltransferase	TP4_00215, ,psos,tRNA dimethylallyltransferase	TP4479_10775, ,psos,tRNA dimethylallyltransferase	TP8_06815, ,psos,tRNA dimethylallyltransferase	TP_2849_01830, ,psos,tRNA dimethylallyltransferase	UFV1_04990, ,psos,tRNA dimethylallyltransferase	jx18_02000, ,psos,tRNA dimethylallyltransferase
336	TP6375_01745, ,psos,tRNA-2-methylthio-N(6)-dimethylallyladenosine synthase	2012CQ_ZSH_09335, ,psos,tRNA-2-methylthio-N(6)-dimethylallyladenosine synthase	Arash114_01745, ,psos,tRNA-2-methylthio-N(6)-dimethylallyladenosine synthase	Bu5_04210, ,psos,tRNA-2-methylthio-N(6)-dimethylallyladenosine synthase	DSM_20630_03900, ,psos,tRNA-2-methylthio-N(6)-dimethylallyladenosine synthase	MS249_01405, ,psos,tRNA-2-methylthio-N(6)-dimethylallyladenosine synthase	NCTC5224_06295, ,psos,tRNA-2-methylthio-N(6)-dimethylallyladenosine synthase	SH01_07690, ,psos,tRNA-2-methylthio-N(6)-dimethylallyladenosine synthase	SH02_04695, ,psos,tRNA-2-methylthio-N(6)-dimethylallyladenosine synthase	SH03_01610, ,psos,tRNA-2-methylthio-N(6)-dimethylallyladenosine synthase	TP1_02270, ,psos,tRNA-2-methylthio-N(6)-dimethylallyladenosine synthase	TP2_08135, ,psos,tRNA-2-methylthio-N(6)-dimethylallyladenosine synthase	TP3_04435, ,psos,tRNA-2-methylthio-N(6)-dimethylallyladenosine synthase	TP4_00210, ,psos,tRNA-2-methylthio-N(6)-dimethylallyladenosine synthase	TP4479_10780, ,psos,tRNA-2-methylthio-N(6)-dimethylallyladenosine synthase	TP8_06820, ,psos,tRNA-2-methylthio-N(6)-dimethylallyladenosine synthase	TP_2849_01835, ,psos,tRNA-2-methylthio-N(6)-dimethylallyladenosine synthase	UFV1_04995, ,psos,tRNA-2-methylthio-N(6)-dimethylallyladenosine synthase	jx18_01995, ,psos,tRNA-2-methylthio-N(6)-dimethylallyladenosine synthase
337	TP6375_01750, ,psos,Regulatory protein RecX	2012CQ_ZSH_09340, ,psos,Regulatory protein RecX	Arash114_01750, ,psos,Regulatory protein RecX	Bu5_04205, ,psos,Regulatory protein RecX	DSM_20630_03905, ,psos,Regulatory protein RecX	MS249_01410, ,psos,Regulatory protein RecX	NCTC5224_06300, ,psos,Regulatory protein RecX	SH01_07685, ,psos,Regulatory protein RecX	SH02_04700, ,psos,Regulatory protein RecX	SH03_01615, ,psos,Regulatory protein RecX	TP1_02265, ,psos,Regulatory protein RecX	TP2_08130, ,psos,Regulatory protein RecX	TP3_04440, ,psos,Regulatory protein RecX	TP4_00205, ,psos,Regulatory protein RecX	TP4479_10785, ,psos,Regulatory protein RecX	TP8_06825, ,psos,Regulatory protein RecX	TP_2849_01840, ,psos,Regulatory protein RecX	UFV1_05000, ,psos,Regulatory protein RecX	jx18_01990, ,psos,Regulatory protein RecX
338	TP6375_01755, ,psos,Protein RecA	2012CQ_ZSH_09345, ,psos,Protein RecA	Arash114_01755, ,psos,Protein RecA	Bu5_04200, ,psos,Protein RecA	DSM_20630_03910, ,psos,Protein RecA	MS249_01415, ,psos,Protein RecA	NCTC5224_06305, ,psos,Protein RecA	SH01_07680, ,psos,Protein RecA	SH02_04705, ,psos,Protein RecA	SH03_01620, ,psos,Protein RecA	TP1_02260, ,psos,Protein RecA	TP2_08125, ,psos,Protein RecA	TP3_04445, ,psos,Protein RecA	TP4_00200, ,psos,Protein RecA	TP4479_10790, ,psos,Protein RecA	TP8_06830, ,psos,Protein RecA	TP_2849_01845, ,psos,Protein RecA	UFV1_05005, ,psos,Protein RecA	jx18_01985, ,psos,Protein RecA
339	TP6375_01760, ,psos,DUF3046 domain-containing protein	2012CQ_ZSH_09350, ,psos,DUF3046 domain-containing protein	Arash114_01760, ,psos,DUF3046 domain-containing protein	Bu5_04195, ,psos,DUF3046 domain-containing protein	DSM_20630_03915, ,psos,DUF3046 domain-containing protein	MS249_01420, ,psos,DUF3046 domain-containing protein	NCTC5224_06310, ,psos,DUF3046 domain-containing protein	SH01_07675, ,psos,DUF3046 domain-containing protein	SH02_04710, ,psos,DUF3046 domain-containing protein	SH03_01625, ,psos,DUF3046 domain-containing protein	TP1_02255, ,psos,DUF3046 domain-containing protein	TP2_08120, ,psos,DUF3046 domain-containing protein	TP3_04450, ,psos,DUF3046 domain-containing protein	TP4_00195, ,psos,DUF3046 domain-containing protein	TP4479_10795, ,psos,DUF3046 domain-containing protein	TP8_06835, ,psos,DUF3046 domain-containing protein	TP_2849_01850, ,psos,DUF3046 domain-containing protein	UFV1_05010, ,psos,DUF3046 domain-containing protein	jx18_01980, ,psos,DUF3046 domain-containing protein
340	TP6375_01765, ,psos,XRE family transcriptional regulator	2012CQ_ZSH_09355, ,psos,XRE family transcriptional regulator	Arash114_01765, ,psos,XRE family transcriptional regulator	Bu5_04190, ,psos,XRE family transcriptional regulator	DSM_20630_03920, ,psos,XRE family transcriptional regulator	MS249_01425, ,psos,XRE family transcriptional regulator	NCTC5224_06315, ,psos,XRE family transcriptional regulator	SH01_07670, ,psos,XRE family transcriptional regulator	SH02_04715, ,psos,XRE family transcriptional regulator	SH03_01630, ,psos,XRE family transcriptional regulator	TP1_02250, ,psos,XRE family transcriptional regulator	TP2_08115, ,psos,XRE family transcriptional regulator	TP3_04455, ,psos,XRE family transcriptional regulator	TP4_00190, ,psos,XRE family transcriptional regulator	TP4479_10800, ,psos,XRE family transcriptional regulator	TP8_06840, ,psos,XRE family transcriptional regulator	TP_2849_01855, ,psos,XRE family transcriptional regulator	UFV1_05015, ,psos,XRE family transcriptional regulator	jx18_01975, ,psos,XRE family transcriptional regulator
341	TP6375_01770, ,psos,CinA family protein	2012CQ_ZSH_09360, ,psos,CinA family protein	Arash114_01770, ,psos,CinA family protein	Bu5_04185, ,psos,CinA family protein	DSM_20630_03925, ,psos,CinA family protein	MS249_01430, ,psos,CinA family protein	NCTC5224_06320, ,psos,CinA family protein	SH01_07665, ,psos,CinA family protein	SH02_04720, ,psos,CinA family protein	SH03_01635, ,psos,CinA family protein	TP1_02245, ,psos,CinA family protein	TP2_08110, ,psos,CinA family protein	TP3_04460, ,psos,CinA family protein	TP4_00185, ,psos,CinA family protein	TP4479_10805, ,psos,CinA family protein	TP8_06845, ,psos,CinA family protein	TP_2849_01860, ,psos,CinA family protein	UFV1_05020, ,psos,CinA family protein	jx18_01970, ,psos,CinA family protein
342	TP6375_01775, ,psos,CDP-diacylglycerol--glycerol-3-phosphate 3-phosphatidyl-transferase 2	2012CQ_ZSH_09365, ,psos,CDP-diacylglycerol--glycerol-3-phosphate 3-phosphatidyl-transferase 2	Arash114_01775, ,psos,CDP-diacylglycerol--glycerol-3-phosphate 3-phosphatidyl-transferase 2	Bu5_04180, ,psos,CDP-diacylglycerol--glycerol-3-phosphate 3-phosphatidyl-transferase 2	DSM_20630_03930, ,psos,CDP-diacylglycerol--glycerol-3-phosphate 3-phosphatidyl-transferase 2	MS249_01435, ,psos,CDP-diacylglycerol--glycerol-3-phosphate 3-phosphatidyl-transferase 2	NCTC5224_06325, ,psos,CDP-diacylglycerol--glycerol-3-phosphate 3-phosphatidyl-transferase 2	SH01_07660, ,psos,CDP-diacylglycerol--glycerol-3-phosphate 3-phosphatidyl-transferase 2	SH02_04725, ,psos,CDP-diacylglycerol--glycerol-3-phosphate 3-phosphatidyl-transferase 2	SH03_01640, ,psos,CDP-diacylglycerol--glycerol-3-phosphate 3-phosphatidyl-transferase 2	TP1_02240, ,psos,CDP-diacylglycerol--glycerol-3-phosphate 3-phosphatidyl-transferase 2	TP2_08105, ,psos,CDP-diacylglycerol--glycerol-3-phosphate 3-phosphatidyl-transferase 2	TP3_04465, ,psos,CDP-diacylglycerol--glycerol-3-phosphate 3-phosphatidyl-transferase 2	TP4_00180, ,psos,CDP-diacylglycerol--glycerol-3-phosphate 3-phosphatidyl-transferase 2	TP4479_10810, ,psos,CDP-diacylglycerol--glycerol-3-phosphate 3-phosphatidyl-transferase 2	TP8_06850, ,psos,CDP-diacylglycerol--glycerol-3-phosphate 3-phosphatidyl-transferase 2	TP_2849_01865, ,psos,CDP-diacylglycerol--glycerol-3-phosphate 3-phosphatidyl-transferase 2	UFV1_05025, ,psos,CDP-diacylglycerol--glycerol-3-phosphate 3-phosphatidyl-transferase 2	jx18_01965, ,psos,CDP-diacylglycerol--glycerol-3-phosphate 3-phosphatidyl-transferase 2
343	TP6375_01780, ,psos,Bacterial capsule synthesis protein PGA_cap	2012CQ_ZSH_09370, ,psos,Bacterial capsule synthesis protein PGA_cap	Arash114_01780, ,psos,Bacterial capsule synthesis protein PGA_cap	Bu5_04175, ,psos,Bacterial capsule synthesis protein PGA_cap	DSM_20630_03935, ,psos,Bacterial capsule synthesis protein PGA_cap	MS249_01440, ,psos,Bacterial capsule synthesis protein PGA_cap	NCTC5224_06330, ,psos,Bacterial capsule synthesis protein PGA_cap	SH01_07655, ,psos,Bacterial capsule synthesis protein PGA_cap	SH02_04730, ,psos,Bacterial capsule synthesis protein PGA_cap	SH03_01645, ,psos,Bacterial capsule synthesis protein PGA_cap	TP1_02235, ,psos,Bacterial capsule synthesis protein PGA_cap	TP2_08100, ,psos,Bacterial capsule synthesis protein PGA_cap	TP3_04470, ,psos,Bacterial capsule synthesis protein PGA_cap	TP4_00175, ,psos,Bacterial capsule synthesis protein PGA_cap	TP4479_10815, ,psos,Bacterial capsule synthesis protein PGA_cap	TP8_06855, ,psos,Bacterial capsule synthesis protein PGA_cap	TP_2849_01870, ,psos,Bacterial capsule synthesis protein PGA_cap	UFV1_05030, ,psos,Bacterial capsule synthesis protein PGA_cap	jx18_01960, ,psos,Bacterial capsule synthesis protein PGA_cap
344	TP6375_01785, ,psos,Stage III sporulation protein E	2012CQ_ZSH_09375, ,psos,Stage III sporulation protein E	Arash114_01785, ,psos,Stage III sporulation protein E	Bu5_04170, ,psos,Stage III sporulation protein E	DSM_20630_03940, ,psos,Stage III sporulation protein E	MS249_01445, ,psos,Stage III sporulation protein E	NCTC5224_06335, ,psos,Stage III sporulation protein E	SH01_07650, ,psos,Stage III sporulation protein E	SH02_04735, ,psos,Stage III sporulation protein E	SH03_01650, ,psos,Stage III sporulation protein E	TP1_02230, ,psos,Stage III sporulation protein E	TP2_08095, ,psos,Stage III sporulation protein E	TP3_04475, ,psos,Stage III sporulation protein E	TP4_00170, ,psos,Stage III sporulation protein E	TP4479_10820, ,psos,Stage III sporulation protein E	TP8_06860, ,psos,hypothetical protein	TP_2849_01875, ,psos,Stage III sporulation protein E	UFV1_05035, ,psos,Stage III sporulation protein E	jx18_01955, ,psos,Stage III sporulation protein E
345	TP6375_01790, ,psos,Ribonuclease J	2012CQ_ZSH_09380, ,psos,Ribonuclease J	Arash114_01790, ,psos,Ribonuclease J	Bu5_04165, ,psos,Ribonuclease J	DSM_20630_03945, ,psos,Ribonuclease J	MS249_01450, ,psos,Ribonuclease J	NCTC5224_06340, ,psos,Ribonuclease J	SH01_07645, ,psos,Ribonuclease J	SH02_04740, ,psos,Ribonuclease J	SH03_01655, ,psos,Ribonuclease J	TP1_02225, ,psos,Ribonuclease J	TP2_08090, ,psos,Ribonuclease J	TP3_04480, ,psos,Ribonuclease J	TP4_00165, ,psos,Ribonuclease J	TP4479_10825, ,psos,Ribonuclease J	TP8_06870, ,psos,Ribonuclease J	TP_2849_01880, ,psos,Ribonuclease J	UFV1_05040, ,psos,Ribonuclease J	jx18_01950, ,psos,Ribonuclease J
346	TP6375_01795, ,psos,4-hydroxy-tetrahydrodipicolinate synthase	2012CQ_ZSH_09385, ,psos,4-hydroxy-tetrahydrodipicolinate synthase	Arash114_01795, ,psos,4-hydroxy-tetrahydrodipicolinate synthase	Bu5_04160, ,psos,4-hydroxy-tetrahydrodipicolinate synthase	DSM_20630_03950, ,psos,4-hydroxy-tetrahydrodipicolinate synthase	MS249_01455, ,psos,4-hydroxy-tetrahydrodipicolinate synthase	NCTC5224_06345, ,psos,4-hydroxy-tetrahydrodipicolinate synthase	SH01_07640, ,psos,4-hydroxy-tetrahydrodipicolinate synthase	SH02_04745, ,psos,4-hydroxy-tetrahydrodipicolinate synthase	SH03_01660, ,psos,4-hydroxy-tetrahydrodipicolinate synthase	TP1_02220, ,psos,4-hydroxy-tetrahydrodipicolinate synthase	TP2_08085, ,psos,4-hydroxy-tetrahydrodipicolinate synthase	TP3_04485, ,psos,4-hydroxy-tetrahydrodipicolinate synthase	TP4_00160, ,psos,4-hydroxy-tetrahydrodipicolinate synthase	TP4479_10830, ,psos,4-hydroxy-tetrahydrodipicolinate synthase	TP8_06865, ,psos,4-hydroxy-tetrahydrodipicolinate synthase	TP_2849_01885, ,psos,4-hydroxy-tetrahydrodipicolinate synthase	UFV1_05045, ,psos,4-hydroxy-tetrahydrodipicolinate synthase	jx18_01945, ,psos,4-hydroxy-tetrahydrodipicolinate synthase
347	TP6375_01800, ,psos,GCN5-related protein N-acetyltransferase	2012CQ_ZSH_09390, ,psos,GCN5-related protein N-acetyltransferase	Arash114_01800, ,psos,GCN5-related protein N-acetyltransferase	Bu5_04155, ,psos,GCN5-related protein N-acetyltransferase	DSM_20630_03955, ,psos,GCN5-related protein N-acetyltransferase	MS249_01460, ,psos,GCN5-related protein N-acetyltransferase	NCTC5224_06350, ,psos,GCN5-related protein N-acetyltransferase	SH01_07635, ,psos,GCN5-related protein N-acetyltransferase	SH02_04750, ,psos,GCN5-related protein N-acetyltransferase	SH03_01665, ,psos,GCN5-related protein N-acetyltransferase	TP1_02215, ,psos,GCN5-related protein N-acetyltransferase	TP2_08080, ,psos,GCN5-related protein N-acetyltransferase	TP3_04490, ,psos,GCN5-related protein N-acetyltransferase	TP4_00155, ,psos,GCN5-related protein N-acetyltransferase	TP4479_10835, ,psos,GCN5-related protein N-acetyltransferase	TP8_06880, ,psos,hypothetical protein	TP_2849_01890, ,psos,GCN5-related protein N-acetyltransferase	UFV1_05050, ,psos,GCN5-related protein N-acetyltransferase	jx18_01940, ,psos,GCN5-related protein N-acetyltransferase
348	TP6375_01805, ,psos,ATP-dependent helicase HepA	2012CQ_ZSH_09395, ,psos,ATP-dependent helicase HepA	Arash114_01805, ,psos,ATP-dependent helicase HepA	Bu5_04150, ,psos,ATP-dependent helicase HepA	DSM_20630_03960, ,psos,ATP-dependent helicase HepA	MS249_01465, ,psos,ATP-dependent helicase HepA	NCTC5224_06355, ,psos,ATP-dependent helicase HepA	SH01_07630, ,psos,ATP-dependent helicase HepA	SH02_04755, ,psos,ATP-dependent helicase HepA	SH03_01670, ,psos,ATP-dependent helicase HepA	TP1_02210, ,psos,ATP-dependent helicase HepA	TP2_08075, ,psos,ATP-dependent helicase HepA	TP3_04495, ,psos,ATP-dependent helicase HepA	TP4_00150, ,psos,ATP-dependent helicase HepA	TP4479_10840, ,psos,ATP-dependent helicase HepA	TP8_06885, ,psos,ATP-dependent helicase HepA	TP_2849_01895, ,psos,ATP-dependent helicase HepA	UFV1_05055, ,psos,ATP-dependent helicase HepA	jx18_01935, ,psos,ATP-dependent helicase HepA
349	TP6375_01810, ,psos,4-hydroxy-tetrahydrodipicolinate reductase	2012CQ_ZSH_09400, ,psos,4-hydroxy-tetrahydrodipicolinate reductase	Arash114_01810, ,psos,4-hydroxy-tetrahydrodipicolinate reductase	Bu5_04145, ,psos,4-hydroxy-tetrahydrodipicolinate reductase	DSM_20630_03965, ,psos,4-hydroxy-tetrahydrodipicolinate reductase	MS249_01470, ,psos,4-hydroxy-tetrahydrodipicolinate reductase	NCTC5224_06360, ,psos,4-hydroxy-tetrahydrodipicolinate reductase	SH01_07625, ,psos,4-hydroxy-tetrahydrodipicolinate reductase	SH02_04760, ,psos,4-hydroxy-tetrahydrodipicolinate reductase	SH03_01675, ,psos,4-hydroxy-tetrahydrodipicolinate reductase	TP1_02205, ,psos,4-hydroxy-tetrahydrodipicolinate reductase	TP2_08070, ,psos,4-hydroxy-tetrahydrodipicolinate reductase	TP3_04500, ,psos,4-hydroxy-tetrahydrodipicolinate reductase	TP4_00145, ,psos,4-hydroxy-tetrahydrodipicolinate reductase	TP4479_10845, ,psos,4-hydroxy-tetrahydrodipicolinate reductase	TP8_06890, ,psos,4-hydroxy-tetrahydrodipicolinate reductase	TP_2849_01900, ,psos,4-hydroxy-tetrahydrodipicolinate reductase	UFV1_05060, ,psos,4-hydroxy-tetrahydrodipicolinate reductase	jx18_01930, ,psos,4-hydroxy-tetrahydrodipicolinate reductase
350	TP6375_01815, ,psos,Protease 3	2012CQ_ZSH_09405, ,psos,Protease 3	Arash114_01815, ,psos,Protease 3	Bu5_04140, ,psos,Protease 3	DSM_20630_03970, ,psos,Protease 3	MS249_01475, ,psos,Protease 3	NCTC5224_06365, ,psos,Protease 3	SH01_07620, ,psos,Protease 3	SH02_04765, ,psos,Protease 3	SH03_01680, ,psos,Protease 3	TP1_02200, ,psos,Protease 3	TP2_08065, ,psos,Protease 3	TP3_04505, ,psos,Protease 3	TP4_00140, ,psos,Protease 3	TP4479_10850, ,psos,Protease 3	TP8_06895, ,psos,Protease 3	TP_2849_01905, ,psos,Protease 3	UFV1_05065, ,psos,Protease 3	jx18_01925, ,psos,Protease 3
351	TP6375_01820, ,psos,hypothetical protein	2012CQ_ZSH_09410, ,psos,hypothetical protein	Arash114_01820, ,psos,hypothetical protein	Bu5_04135, ,psos,hypothetical protein	- , -	- , -	- , -	SH01_07615, ,psos,hypothetical protein	SH02_04770, ,psos,hypothetical protein	SH03_01685, ,psos,hypothetical protein	TP1_02195, ,psos,hypothetical protein	- , -	TP3_04510, ,psos,hypothetical protein	- , -	TP4479_10855, ,psos,hypothetical protein	TP8_06900, ,psos,hypothetical protein	TP_2849_01910, ,psos,hypothetical protein	- , -	jx18_01920, ,psos,hypothetical protein
352	TP6375_01825, ,psos,Polyribonucleotide nucleotidyltransferase	2012CQ_ZSH_09415, ,psos,Polyribonucleotide nucleotidyltransferase	Arash114_01825, ,psos,Polyribonucleotide nucleotidyltransferase	Bu5_04130, ,psos,Polyribonucleotide nucleotidyltransferase	DSM_20630_03980, ,psos,hypothetical protein	MS249_10145, ,psos,Polyribonucleotide nucleotidyltransferase	NCTC5224_06375, ,psos,Polyribonucleotide nucleotidyltransferase	SH01_07610, ,psos,Polyribonucleotide nucleotidyltransferase	SH02_04775, ,psos,Polyribonucleotide nucleotidyltransferase	SH03_01690, ,psos,Polyribonucleotide nucleotidyltransferase	TP1_02190, ,psos,Polyribonucleotide nucleotidyltransferase	TP2_08060, ,psos,Polyribonucleotide nucleotidyltransferase	TP3_04515, ,psos,Polyribonucleotide nucleotidyltransferase	TP4_00130, ,psos,Polyribonucleotide nucleotidyltransferase	TP4479_10860, ,psos,Polyribonucleotide nucleotidyltransferase	TP8_06905, ,psos,Polyribonucleotide nucleotidyltransferase	TP_2849_01915, ,psos,Polyribonucleotide nucleotidyltransferase	UFV1_04670, ,psos,Polyribonucleotide nucleotidyltransferase	jx18_01915, ,psos,Polyribonucleotide nucleotidyltransferase
353	TP6375_01830, ,psos,30S ribosomal protein S15	2012CQ_ZSH_09420, ,psos,30S ribosomal protein S15	Arash114_01830, ,psos,30S ribosomal protein S15	Bu5_04125, ,psos,30S ribosomal protein S15	- , -	MS249_09945, ,psos,30S ribosomal protein S15	NCTC5224_06380, ,psos,30S ribosomal protein S15	SH01_07605, ,psos,30S ribosomal protein S15	SH02_04780, ,psos,30S ribosomal protein S15	SH03_01695, ,psos,30S ribosomal protein S15	TP1_02185, ,psos,30S ribosomal protein S15	TP2_08055, ,psos,30S ribosomal protein S15	TP3_04520, ,psos,30S ribosomal protein S15	TP4_00125, ,psos,30S ribosomal protein S15	TP4479_10865, ,psos,30S ribosomal protein S15	TP8_06910, ,psos,30S ribosomal protein S15	TP_2849_01920, ,psos,30S ribosomal protein S15	UFV1_04675, ,psos,30S ribosomal protein S15	jx18_01910, ,psos,30S ribosomal protein S15
354	TP6375_01835, ,psos,hypothetical protein	2012CQ_ZSH_09425, ,psos,hypothetical protein	Arash114_01835, ,psos,hypothetical protein	Bu5_04115, ,psos,hypothetical protein	DSM_20630_05050, ,psos,hypothetical protein	MS249_02700, ,psos,hypothetical protein	NCTC5224_06385, ,psos,hypothetical protein	SH01_07600, ,psos,hypothetical protein	SH02_04785, ,psos,hypothetical protein	SH03_01700, ,psos,hypothetical protein	TP1_02180, ,psos,hypothetical protein	TP2_08050, ,psos,hypothetical protein	TP3_04530, ,psos,hypothetical protein	TP4_00120, ,psos,hypothetical protein	TP4479_00005, ,psos,hypothetical protein	TP8_06915, ,psos,hypothetical protein	TP_2849_01930, ,psos,hypothetical protein	UFV1_04525, ,psos,hypothetical protein	jx18_01905, ,psos,hypothetical protein
355	TP6375_01840, ,psos,Glutamine transport ATP-binding protein GlnQ	2012CQ_ZSH_09430, ,psos,Glutamine transport ATP-binding protein GlnQ	Arash114_01840, ,psos,Glutamine transport ATP-binding protein GlnQ	Bu5_04110, ,psos,Glutamine transport ATP-binding protein GlnQ	DSM_20630_05045, ,psos,Glutamine transport ATP-binding protein GlnQ	MS249_02695, ,psos,Glutamine transport ATP-binding protein GlnQ	NCTC5224_06390, ,psos,Glutamine transport ATP-binding protein GlnQ	SH01_07595, ,psos,Glutamine transport ATP-binding protein GlnQ	SH02_04790, ,psos,Glutamine transport ATP-binding protein GlnQ	SH03_01705, ,psos,Glutamine transport ATP-binding protein GlnQ	TP1_02175, ,psos,Glutamine transport ATP-binding protein GlnQ	TP2_08045, ,psos,Glutamine transport ATP-binding protein GlnQ	TP3_04535, ,psos,Glutamine transport ATP-binding protein GlnQ	TP4_00115, ,psos,Glutamine transport ATP-binding protein GlnQ	TP4479_00010, ,psos,Glutamine transport ATP-binding protein GlnQ	TP8_06920, ,psos,Glutamine transport ATP-binding protein GlnQ	TP_2849_01935, ,psos,Glutamine transport ATP-binding protein GlnQ	UFV1_04530, ,psos,Glutamine transport ATP-binding protein GlnQ	jx18_01900, ,psos,Glutamine transport ATP-binding protein GlnQ
356	TP6375_01845, ,psos,hypothetical protein	2012CQ_ZSH_09435, ,psos,hypothetical protein	Arash114_01845, ,psos,hypothetical protein	Bu5_04105, ,psos,hypothetical protein	DSM_20630_05040, ,psos,hypothetical protein	MS249_02690, ,psos,hypothetical protein	NCTC5224_06395, ,psos,hypothetical protein	SH01_07590, ,psos,hypothetical protein	SH02_04795, ,psos,hypothetical protein	SH03_01710, ,psos,hypothetical protein	TP1_02170, ,psos,hypothetical protein	TP2_08040, ,psos,hypothetical protein	TP3_04540, ,psos,hypothetical protein	TP4_00110, ,psos,hypothetical protein	TP4479_00015, ,psos,hypothetical protein	TP8_06925, ,psos,hypothetical protein	TP_2849_01940, ,psos,hypothetical protein	UFV1_04535, ,psos,hypothetical protein	jx18_01895, ,psos,hypothetical protein
357	TP6375_01850, ,psos,Riboflavin biosynthesis protein	2012CQ_ZSH_09440, ,psos,Riboflavin biosynthesis protein	Arash114_01850, ,psos,Riboflavin biosynthesis protein	Bu5_04100, ,psos,Riboflavin biosynthesis protein	DSM_20630_05035, ,psos,Riboflavin biosynthesis protein	MS249_02685, ,psos,Riboflavin biosynthesis protein	NCTC5224_06400, ,psos,Riboflavin biosynthesis protein	SH01_07585, ,psos,Riboflavin biosynthesis protein	SH02_04800, ,psos,Riboflavin biosynthesis protein	SH03_01715, ,psos,Riboflavin biosynthesis protein	TP1_02165, ,psos,Riboflavin biosynthesis protein	TP2_08035, ,psos,Riboflavin biosynthesis protein	TP3_04545, ,psos,Riboflavin biosynthesis protein	TP4_00105, ,psos,Riboflavin biosynthesis protein	TP4479_00020, ,psos,Riboflavin biosynthesis protein	TP8_06930, ,psos,bifunctional riboflavin kinase/FMN adenylyltransferase	TP_2849_01945, ,psos,Riboflavin biosynthesis protein	UFV1_04540, ,psos,Riboflavin biosynthesis protein	jx18_01890, ,psos,Riboflavin biosynthesis protein
358	TP6375_01855, ,psos,DUF2207 domain-containing protein	2012CQ_ZSH_09445, ,psos,DUF2207 domain-containing protein	Arash114_01855, ,psos,DUF2207 domain-containing protein	Bu5_04095, ,psos,DUF2207 domain-containing protein	DSM_20630_05030, ,psos,DUF2207 domain-containing protein	MS249_02680, ,psos,DUF2207 domain-containing protein	NCTC5224_06405, ,psos,DUF2207 domain-containing protein	SH01_07575, ,psos,DUF2207 domain-containing protein	SH02_04805, ,psos,DUF2207 domain-containing protein	SH03_01720, ,psos,DUF2207 domain-containing protein	TP1_02160, ,psos,DUF2207 domain-containing protein	TP2_08030, ,psos,DUF2207 domain-containing protein	TP3_04550, ,psos,DUF2207 domain-containing protein	TP4_00100, ,psos,DUF2207 domain-containing protein	TP4479_00025, ,psos,DUF2207 domain-containing protein	TP8_06970, ,psos,DUF2207 domain-containing protein	TP_2849_01950, ,psos,DUF2207 domain-containing protein	UFV1_04545, ,psos,DUF2207 domain-containing protein	jx18_01885, ,psos,DUF2207 domain-containing protein
359	TP6375_01860, ,psos,LemA family	2012CQ_ZSH_09450, ,psos,LemA family	Arash114_01860, ,psos,LemA family	Bu5_04090, ,psos,LemA family	DSM_20630_05025, ,psos,LemA family	MS249_02675, ,psos,LemA family	NCTC5224_06410, ,psos,LemA family	SH01_07570, ,psos,LemA family	SH02_04810, ,psos,LemA family	SH03_01725, ,psos,LemA family	TP1_02155, ,psos,LemA family	TP2_08025, ,psos,LemA family	TP3_04555, ,psos,LemA family	TP4_00095, ,psos,LemA family	TP4479_00030, ,psos,LemA family	TP8_06965, ,psos,LemA family	TP_2849_01955, ,psos,LemA family	UFV1_04550, ,psos,LemA family	jx18_01880, ,psos,LemA family
360	TP6375_01865, ,psos,Fe(3+) ions import ATP-binding protein FbpC	2012CQ_ZSH_09455, ,psos,Fe(3+) ions import ATP-binding protein FbpC	Arash114_01865, ,psos,Fe(3+) ions import ATP-binding protein FbpC	Bu5_04085, ,psos,Fe(3+) ions import ATP-binding protein FbpC	DSM_20630_05020, ,psos,Fe(3+) ions import ATP-binding protein FbpC	MS249_02670, ,psos,Fe(3+) ions import ATP-binding protein FbpC	NCTC5224_06415, ,psos,Fe(3+) ions import ATP-binding protein FbpC	SH01_07565, ,psos,Fe(3+) ions import ATP-binding protein FbpC	SH02_04815, ,psos,Fe(3+) ions import ATP-binding protein FbpC	SH03_01730, ,psos,Fe(3+) ions import ATP-binding protein FbpC	TP1_02150, ,psos,Fe(3+) ions import ATP-binding protein FbpC	TP2_08020, ,psos,Fe(3+) ions import ATP-binding protein FbpC	TP3_04560, ,psos,Fe(3+) ions import ATP-binding protein FbpC	TP4_00090, ,psos,Fe(3+) ions import ATP-binding protein FbpC	TP4479_00035, ,psos,Fe(3+) ions import ATP-binding protein FbpC	TP8_06960, ,psos,Fe(3+) ions import ATP-binding protein FbpC	TP_2849_01960, ,psos,Fe(3+) ions import ATP-binding protein FbpC	UFV1_04555, ,psos,Fe(3+) ions import ATP-binding protein FbpC	jx18_01875, ,psos,Fe(3+) ions import ATP-binding protein FbpC
361	TP6375_01870, ,psos,ABC transmembrane type-1 domain-containing protein	2012CQ_ZSH_09460, ,psos,ABC transmembrane type-1 domain-containing protein	Arash114_01870, ,psos,ABC transmembrane type-1 domain-containing protein	Bu5_04080, ,psos,ABC transmembrane type-1 domain-containing protein	DSM_20630_05015, ,psos,ABC transmembrane type-1 domain-containing protein	MS249_02665, ,psos,ABC transmembrane type-1 domain-containing protein	NCTC5224_06420, ,psos,ABC transmembrane type-1 domain-containing protein	SH01_07560, ,psos,ABC transmembrane type-1 domain-containing protein	SH02_04820, ,psos,ABC transmembrane type-1 domain-containing protein	SH03_01735, ,psos,ABC transmembrane type-1 domain-containing protein	TP1_02145, ,psos,ABC transmembrane type-1 domain-containing protein	TP2_08015, ,psos,ABC transmembrane type-1 domain-containing protein	TP3_04565, ,psos,ABC transmembrane type-1 domain-containing protein	TP4_00085, ,psos,ABC transmembrane type-1 domain-containing protein	TP4479_00040, ,psos,ABC transmembrane type-1 domain-containing protein	TP8_06955, ,psos,ABC transmembrane type-1 domain-containing protein	TP_2849_01965, ,psos,ABC transmembrane type-1 domain-containing protein	UFV1_04560, ,psos,ABC transmembrane type-1 domain-containing protein	jx18_01870, ,psos,ABC transmembrane type-1 domain-containing protein
362	TP6375_01875, ,psos,Glycerol-3-phosphate transporter	2012CQ_ZSH_09465, ,psos,Glycerol-3-phosphate transporter	Arash114_01875, ,psos,Glycerol-3-phosphate transporter	Bu5_04075, ,psos,Glycerol-3-phosphate transporter	DSM_20630_05010, ,psos,Glycerol-3-phosphate transporter	MS249_02660, ,psos,Glycerol-3-phosphate transporter	NCTC5224_06425, ,psos,Glycerol-3-phosphate transporter	SH01_07555, ,psos,Glycerol-3-phosphate transporter	SH02_04825, ,psos,Glycerol-3-phosphate transporter	SH03_01740, ,psos,Glycerol-3-phosphate transporter	TP1_02140, ,psos,Glycerol-3-phosphate transporter	TP2_08010, ,psos,Glycerol-3-phosphate transporter	TP3_04570, ,psos,Glycerol-3-phosphate transporter	TP4_00080, ,psos,Glycerol-3-phosphate transporter	TP4479_00045, ,psos,Glycerol-3-phosphate transporter	TP8_06950, ,psos,Glycerol-3-phosphate transporter	TP_2849_01970, ,psos,Glycerol-3-phosphate transporter	UFV1_04565, ,psos,Glycerol-3-phosphate transporter	jx18_01865, ,psos,Glycerol-3-phosphate transporter
363	TP6375_01880, ,psos,Alkaline phosphatase synthesis transcriptional regulatory protein phoP	2012CQ_ZSH_09470, ,psos,Alkaline phosphatase synthesis transcriptional regulatory protein phoP	Arash114_01880, ,psos,Alkaline phosphatase synthesis transcriptional regulatory protein phoP	Bu5_04070, ,psos,Alkaline phosphatase synthesis transcriptional regulatory protein phoP	DSM_20630_05005, ,psos,Alkaline phosphatase synthesis transcriptional regulatory protein phoP	MS249_02655, ,psos,Alkaline phosphatase synthesis transcriptional regulatory protein phoP	NCTC5224_06430, ,psos,Alkaline phosphatase synthesis transcriptional regulatory protein phoP	SH01_07550, ,psos,Alkaline phosphatase synthesis transcriptional regulatory protein phoP	SH02_04830, ,psos,Alkaline phosphatase synthesis transcriptional regulatory protein phoP	SH03_01745, ,psos,Alkaline phosphatase synthesis transcriptional regulatory protein phoP	TP1_02135, ,psos,Alkaline phosphatase synthesis transcriptional regulatory protein phoP	TP2_08005, ,psos,Alkaline phosphatase synthesis transcriptional regulatory protein phoP	TP3_04575, ,psos,Alkaline phosphatase synthesis transcriptional regulatory protein phoP	TP4_00075, ,psos,Alkaline phosphatase synthesis transcriptional regulatory protein phoP	TP4479_00050, ,psos,Alkaline phosphatase synthesis transcriptional regulatory protein phoP	TP8_06945, ,psos,Alkaline phosphatase synthesis transcriptional regulatory protein phoP	TP_2849_01975, ,psos,Alkaline phosphatase synthesis transcriptional regulatory protein phoP	UFV1_04570, ,psos,Alkaline phosphatase synthesis transcriptional regulatory protein phoP	jx18_01860, ,psos,Alkaline phosphatase synthesis transcriptional regulatory protein phoP
364	TP6375_01885, ,psos,Sensor protein evgS	2012CQ_ZSH_09475, ,psos,Sensor protein evgS	Arash114_01885, ,psos,Sensor protein evgS	Bu5_04065, ,psos,Sensor protein evgS	DSM_20630_05000, ,psos,Sensor protein evgS	MS249_02650, ,psos,Sensor protein evgS	NCTC5224_06435, ,psos,Sensor protein evgS	SH01_07545, ,psos,Sensor protein evgS	SH02_04835, ,psos,Sensor protein evgS	SH03_01750, ,psos,Sensor protein evgS	TP1_02130, ,psos,Sensor protein evgS	TP2_08000, ,psos,Sensor protein evgS	TP3_04580, ,psos,Sensor protein evgS	TP4_00070, ,psos,Sensor protein evgS	TP4479_00055, ,psos,Sensor protein evgS	TP8_06940, ,psos,Sensor protein evgS	TP_2849_01980, ,psos,Sensor protein evgS	UFV1_04575, ,psos,Sensor protein evgS	jx18_01855, ,psos,Sensor protein evgS
365	TP6375_01890, ,psos,tRNA pseudouridine synthase B	2012CQ_ZSH_09480, ,psos,tRNA pseudouridine synthase B	Arash114_01890, ,psos,tRNA pseudouridine synthase B	Bu5_04060, ,psos,tRNA pseudouridine synthase B	DSM_20630_04995, ,psos,tRNA pseudouridine synthase B	MS249_02645, ,psos,tRNA pseudouridine synthase B	NCTC5224_06440, ,psos,tRNA pseudouridine synthase B	SH01_07540, ,psos,tRNA pseudouridine synthase B	SH02_04840, ,psos,tRNA pseudouridine synthase B	SH03_01755, ,psos,tRNA pseudouridine synthase B	TP1_02125, ,psos,tRNA pseudouridine synthase B	TP2_07995, ,psos,tRNA pseudouridine synthase B	TP3_04585, ,psos,tRNA pseudouridine synthase B	TP4_00065, ,psos,tRNA pseudouridine synthase B	TP4479_00060, ,psos,tRNA pseudouridine synthase B	TP8_06980, ,psos,tRNA pseudouridine(55) synthase TruB	TP_2849_01985, ,psos,tRNA pseudouridine synthase B	UFV1_04580, ,psos,tRNA pseudouridine synthase B	jx18_01850, ,psos,tRNA pseudouridine synthase B
366	TP6375_01895, ,psos,Ribosome-binding factor A	2012CQ_ZSH_09485, ,psos,Ribosome-binding factor A	Arash114_01895, ,psos,Ribosome-binding factor A	Bu5_04055, ,psos,Ribosome-binding factor A	DSM_20630_04990, ,psos,Ribosome-binding factor A	MS249_02640, ,psos,Ribosome-binding factor A	NCTC5224_06445, ,psos,Ribosome-binding factor A	SH01_07535, ,psos,Ribosome-binding factor A	SH02_04845, ,psos,Ribosome-binding factor A	SH03_01760, ,psos,Ribosome-binding factor A	TP1_02120, ,psos,Ribosome-binding factor A	TP2_07990, ,psos,Ribosome-binding factor A	TP3_04590, ,psos,Ribosome-binding factor A	TP4_00060, ,psos,Ribosome-binding factor A	TP4479_00065, ,psos,Ribosome-binding factor A	TP8_06985, ,psos,Ribosome-binding factor A	TP_2849_01990, ,psos,Ribosome-binding factor A	UFV1_04585, ,psos,Ribosome-binding factor A	jx18_01845, ,psos,Ribosome-binding factor A
367	TP6375_01900, ,psos,Translation initiation factor IF-2	2012CQ_ZSH_09490, ,psos,Translation initiation factor IF-2	Arash114_01900, ,psos,Translation initiation factor IF-2	Bu5_04050, ,psos,Translation initiation factor IF-2	DSM_20630_04985, ,psos,Translation initiation factor IF-2	MS249_02635, ,psos,Translation initiation factor IF-2	NCTC5224_06450, ,psos,Translation initiation factor IF-2	SH01_07530, ,psos,Translation initiation factor IF-2	SH02_04850, ,psos,Translation initiation factor IF-2	SH03_01765, ,psos,Translation initiation factor IF-2	TP1_02115, ,psos,Translation initiation factor IF-2	TP2_07985, ,psos,Translation initiation factor IF-2	TP3_04595, ,psos,Translation initiation factor IF-2	TP4_00055, ,psos,Translation initiation factor IF-2	TP4479_00070, ,psos,Translation initiation factor IF-2	TP8_06990, ,psos,Translation initiation factor IF-2	TP_2849_01995, ,psos,Translation initiation factor IF-2	UFV1_04590, ,psos,Translation initiation factor IF-2	jx18_01840, ,psos,Translation initiation factor IF-2
368	TP6375_01905, ,psos,Transcription termination/antitermination protein NusA	2012CQ_ZSH_09495, ,psos,Transcription termination/antitermination protein NusA	Arash114_01905, ,psos,Transcription termination/antitermination protein NusA	Bu5_04045, ,psos,Transcription termination/antitermination protein NusA	DSM_20630_04980, ,psos,Transcription termination/antitermination protein NusA	MS249_02630, ,psos,Transcription termination/antitermination protein NusA	NCTC5224_06455, ,psos,Transcription termination/antitermination protein NusA	SH01_07525, ,psos,Transcription termination/antitermination protein NusA	SH02_04855, ,psos,Transcription termination/antitermination protein NusA	SH03_01770, ,psos,Transcription termination/antitermination protein NusA	TP1_02110, ,psos,Transcription termination/antitermination protein NusA	TP2_07980, ,psos,Transcription termination/antitermination protein NusA	TP3_04600, ,psos,Transcription termination/antitermination protein NusA	TP4_00050, ,psos,Transcription termination/antitermination protein NusA	TP4479_00075, ,psos,Transcription termination/antitermination protein NusA	TP8_06995, ,psos,Transcription termination/antitermination protein NusA	TP_2849_02000, ,psos,Transcription termination/antitermination protein NusA	UFV1_04595, ,psos,Transcription termination/antitermination protein NusA	jx18_01835, ,psos,Transcription termination/antitermination protein NusA
369	TP6375_01910, ,psos,Ribosome maturation factor RimP	2012CQ_ZSH_09500, ,psos,Ribosome maturation factor RimP	Arash114_01910, ,psos,Ribosome maturation factor RimP	Bu5_04040, ,psos,Ribosome maturation factor RimP	DSM_20630_04975, ,psos,Ribosome maturation factor RimP	MS249_02625, ,psos,Ribosome maturation factor RimP	NCTC5224_06460, ,psos,Ribosome maturation factor RimP	SH01_07520, ,psos,Ribosome maturation factor RimP	SH02_04860, ,psos,Ribosome maturation factor RimP	SH03_01775, ,psos,Ribosome maturation factor RimP	TP1_02105, ,psos,Ribosome maturation factor RimP	TP2_07975, ,psos,Ribosome maturation factor RimP	TP3_04605, ,psos,Ribosome maturation factor RimP	TP4_00045, ,psos,Ribosome maturation factor RimP	TP4479_00080, ,psos,Ribosome maturation factor RimP	TP8_07000, ,psos,Ribosome maturation factor RimP	TP_2849_02005, ,psos,Ribosome maturation factor RimP	UFV1_04600, ,psos,Ribosome maturation factor RimP	jx18_01830, ,psos,Ribosome maturation factor RimP
370	TP6375_01915, ,psos,hypothetical protein	2012CQ_ZSH_09505, ,psos,hypothetical protein	Arash114_01915, ,psos,hypothetical protein	Bu5_04035, ,psos,hypothetical protein	DSM_20630_04970, ,psos,hypothetical protein	MS249_02620, ,psos,hypothetical protein	NCTC5224_06465, ,psos,hypothetical protein	SH01_07515, ,psos,hypothetical protein	SH02_04865, ,psos,hypothetical protein	SH03_01780, ,psos,hypothetical protein	TP1_02100, ,psos,hypothetical protein	TP2_07970, ,psos,hypothetical protein	TP3_04610, ,psos,hypothetical protein	TP4_00040, ,psos,hypothetical protein	TP4479_00085, ,psos,hypothetical protein	TP8_07005, ,psos,hypothetical protein	TP_2849_02010, ,psos,hypothetical protein	UFV1_04605, ,psos,hypothetical protein	jx18_01825, ,psos,hypothetical protein
371	TP6375_01920, ,psos,Proline--tRNA ligase	2012CQ_ZSH_09510, ,psos,Proline--tRNA ligase	Arash114_01920, ,psos,Proline--tRNA ligase	Bu5_04030, ,psos,Proline--tRNA ligase	DSM_20630_04965, ,psos,Proline--tRNA ligase	MS249_02615, ,psos,Proline--tRNA ligase	NCTC5224_06470, ,psos,Proline--tRNA ligase	SH01_07510, ,psos,Proline--tRNA ligase	SH02_04870, ,psos,Proline--tRNA ligase	SH03_01785, ,psos,Proline--tRNA ligase	TP1_02095, ,psos,Proline--tRNA ligase	TP2_07965, ,psos,Proline--tRNA ligase	TP3_04615, ,psos,Proline--tRNA ligase	TP4_00035, ,psos,Proline--tRNA ligase	TP4479_00090, ,psos,Proline--tRNA ligase	TP8_07010, ,psos,Proline--tRNA ligase	TP_2849_02015, ,psos,Proline--tRNA ligase	UFV1_04610, ,psos,Proline--tRNA ligase	jx18_01820, ,psos,Proline--tRNA ligase
372	TP6375_01925, ,psos,GNAT family N-acetyltransferase	2012CQ_ZSH_09515, ,psos,GNAT family N-acetyltransferase	Arash114_01925, ,psos,GNAT family N-acetyltransferase	Bu5_04025, ,psos,GNAT family N-acetyltransferase	DSM_20630_04960, ,psos,GNAT family N-acetyltransferase	MS249_02610, ,psos,GNAT family N-acetyltransferase	NCTC5224_06475, ,psos,GNAT family N-acetyltransferase	SH01_07505, ,psos,GNAT family N-acetyltransferase	SH02_04875, ,psos,GNAT family N-acetyltransferase	SH03_01790, ,psos,GNAT family N-acetyltransferase	TP1_02090, ,psos,GNAT family N-acetyltransferase	TP2_07960, ,psos,GNAT family N-acetyltransferase	TP3_04620, ,psos,GNAT family N-acetyltransferase	TP4_00030, ,psos,GNAT family N-acetyltransferase	TP4479_00095, ,psos,GNAT family N-acetyltransferase	TP8_07015, ,psos,GNAT family N-acetyltransferase	TP_2849_02020, ,psos,GNAT family N-acetyltransferase	UFV1_04615, ,psos,GNAT family N-acetyltransferase	jx18_01815, ,psos,GNAT family N-acetyltransferase
373	TP6375_01930, ,psos,4-hydroxy-3-methylbut-2-en-1-yl diphosphate synthase (flavodoxin)	2012CQ_ZSH_09520, ,psos,4-hydroxy-3-methylbut-2-en-1-yl diphosphate synthase (flavodoxin)	Arash114_01930, ,psos,4-hydroxy-3-methylbut-2-en-1-yl diphosphate synthase (flavodoxin)	Bu5_04020, ,psos,4-hydroxy-3-methylbut-2-en-1-yl diphosphate synthase (flavodoxin)	DSM_20630_04955, ,psos,4-hydroxy-3-methylbut-2-en-1-yl diphosphate synthase (flavodoxin)	MS249_02605, ,psos,4-hydroxy-3-methylbut-2-en-1-yl diphosphate synthase (flavodoxin)	NCTC5224_06480, ,psos,4-hydroxy-3-methylbut-2-en-1-yl diphosphate synthase (flavodoxin)	SH01_07500, ,psos,4-hydroxy-3-methylbut-2-en-1-yl diphosphate synthase (flavodoxin)	SH02_04880, ,psos,4-hydroxy-3-methylbut-2-en-1-yl diphosphate synthase (flavodoxin)	SH03_01795, ,psos,4-hydroxy-3-methylbut-2-en-1-yl diphosphate synthase (flavodoxin)	TP1_02085, ,psos,4-hydroxy-3-methylbut-2-en-1-yl diphosphate synthase (flavodoxin)	TP2_07955, ,psos,4-hydroxy-3-methylbut-2-en-1-yl diphosphate synthase (flavodoxin)	TP3_04625, ,psos,4-hydroxy-3-methylbut-2-en-1-yl diphosphate synthase (flavodoxin)	TP4_00025, ,psos,4-hydroxy-3-methylbut-2-en-1-yl diphosphate synthase (flavodoxin)	TP4479_00100, ,psos,4-hydroxy-3-methylbut-2-en-1-yl diphosphate synthase (flavodoxin)	TP8_07020, ,psos,4-hydroxy-3-methylbut-2-en-1-yl diphosphate synthase (flavodoxin)	TP_2849_02025, ,psos,4-hydroxy-3-methylbut-2-en-1-yl diphosphate synthase (flavodoxin)	UFV1_04620, ,psos,4-hydroxy-3-methylbut-2-en-1-yl diphosphate synthase (flavodoxin)	jx18_01810, ,psos,4-hydroxy-3-methylbut-2-en-1-yl diphosphate synthase (flavodoxin)
374	TP6375_01935, ,psos,Metalloprotease mmpA	2012CQ_ZSH_09525, ,psos,Metalloprotease mmpA	Arash114_01935, ,psos,Metalloprotease mmpA	Bu5_04015, ,psos,Metalloprotease mmpA	DSM_20630_04950, ,psos,Metalloprotease mmpA	MS249_02600, ,psos,Metalloprotease mmpA	NCTC5224_06485, ,psos,Metalloprotease mmpA	SH01_07495, ,psos,Metalloprotease mmpA	SH02_04885, ,psos,Metalloprotease mmpA	SH03_01800, ,psos,Metalloprotease mmpA	TP1_02080, ,psos,Metalloprotease mmpA	TP2_07950, ,psos,Metalloprotease mmpA	TP3_04630, ,psos,Metalloprotease mmpA	TP4_00020, ,psos,Metalloprotease mmpA	TP4479_00105, ,psos,Metalloprotease mmpA	TP8_07025, ,psos,Metalloprotease mmpA	TP_2849_02030, ,psos,Metalloprotease mmpA	UFV1_04625, ,psos,Metalloprotease mmpA	jx18_01805, ,psos,Metalloprotease mmpA
375	TP6375_01940, ,psos,1-deoxy-D-xylulose 5-phosphate reductoisomerase	2012CQ_ZSH_09530, ,psos,1-deoxy-D-xylulose 5-phosphate reductoisomerase	Arash114_01940, ,psos,1-deoxy-D-xylulose 5-phosphate reductoisomerase	Bu5_04010, ,psos,1-deoxy-D-xylulose 5-phosphate reductoisomerase	DSM_20630_04945, ,psos,1-deoxy-D-xylulose 5-phosphate reductoisomerase	MS249_02595, ,psos,1-deoxy-D-xylulose 5-phosphate reductoisomerase	NCTC5224_06490, ,psos,1-deoxy-D-xylulose 5-phosphate reductoisomerase	SH01_07490, ,psos,1-deoxy-D-xylulose 5-phosphate reductoisomerase	SH02_04890, ,psos,1-deoxy-D-xylulose 5-phosphate reductoisomerase	SH03_01805, ,psos,1-deoxy-D-xylulose 5-phosphate reductoisomerase	TP1_02075, ,psos,1-deoxy-D-xylulose 5-phosphate reductoisomerase	TP2_07945, ,psos,1-deoxy-D-xylulose 5-phosphate reductoisomerase	TP3_04635, ,psos,1-deoxy-D-xylulose 5-phosphate reductoisomerase	TP4_00015, ,psos,1-deoxy-D-xylulose 5-phosphate reductoisomerase	TP4479_00110, ,psos,1-deoxy-D-xylulose 5-phosphate reductoisomerase	TP8_07030, ,psos,1-deoxy-D-xylulose 5-phosphate reductoisomerase	TP_2849_02035, ,psos,1-deoxy-D-xylulose 5-phosphate reductoisomerase	UFV1_04630, ,psos,1-deoxy-D-xylulose 5-phosphate reductoisomerase	jx18_01800, ,psos,1-deoxy-D-xylulose 5-phosphate reductoisomerase
376	TP6375_01945, ,psos,Cell division protein DivIVA	2012CQ_ZSH_09535, ,psos,Cell division protein DivIVA	Arash114_01945, ,psos,Cell division protein DivIVA	Bu5_04005, ,psos,Cell division protein DivIVA	DSM_20630_04940, ,psos,Cell division protein DivIVA	MS249_02590, ,psos,Cell division protein DivIVA	NCTC5224_06495, ,psos,Cell division protein DivIVA	SH01_07485, ,psos,Cell division protein DivIVA	SH02_04895, ,psos,Cell division protein DivIVA	SH03_01810, ,psos,Cell division protein DivIVA	TP1_02070, ,psos,Cell division protein DivIVA	TP2_07940, ,psos,Cell division protein DivIVA	TP3_04640, ,psos,Cell division protein DivIVA	TP4_00010, ,psos,Cell division protein DivIVA	TP4479_00115, ,psos,Cell division protein DivIVA	TP8_07035, ,psos,Cell division protein DivIVA	TP_2849_02040, ,psos,Cell division protein DivIVA	UFV1_04635, ,psos,Cell division protein DivIVA	jx18_01795, ,psos,Cell division protein DivIVA
377	TP6375_01950, ,psos,Probable dual-specificity RNA methyltransferase RlmN	2012CQ_ZSH_09540, ,psos,Probable dual-specificity RNA methyltransferase RlmN	Arash114_01950, ,psos,Probable dual-specificity RNA methyltransferase RlmN	Bu5_04000, ,psos,Probable dual-specificity RNA methyltransferase RlmN	DSM_20630_04935, ,psos,Probable dual-specificity RNA methyltransferase RlmN	MS249_02585, ,psos,Probable dual-specificity RNA methyltransferase RlmN	NCTC5224_06500, ,psos,Probable dual-specificity RNA methyltransferase RlmN	SH01_07480, ,psos,Probable dual-specificity RNA methyltransferase RlmN	SH02_04900, ,psos,Probable dual-specificity RNA methyltransferase RlmN	SH03_01815, ,psos,Probable dual-specificity RNA methyltransferase RlmN	TP1_02065, ,psos,Probable dual-specificity RNA methyltransferase RlmN	TP2_07935, ,psos,Probable dual-specificity RNA methyltransferase RlmN	TP3_04645, ,psos,Probable dual-specificity RNA methyltransferase RlmN	TP4_00005, ,psos,Probable dual-specificity RNA methyltransferase RlmN	TP4479_00120, ,psos,Probable dual-specificity RNA methyltransferase RlmN	TP8_07040, ,psos,Probable dual-specificity RNA methyltransferase RlmN	TP_2849_02045, ,psos,Probable dual-specificity RNA methyltransferase RlmN	UFV1_04640, ,psos,Probable dual-specificity RNA methyltransferase RlmN	jx18_01790, ,psos,Probable dual-specificity RNA methyltransferase RlmN
378	TP6375_01955, ,psos,Phosphatidate cytidylyltransferase	2012CQ_ZSH_09545, ,psos,Phosphatidate cytidylyltransferase	Arash114_01955, ,psos,Phosphatidate cytidylyltransferase	Bu5_03995, ,psos,Phosphatidate cytidylyltransferase	DSM_20630_04930, ,psos,Phosphatidate cytidylyltransferase	MS249_02580, ,psos,Phosphatidate cytidylyltransferase	NCTC5224_06505, ,psos,Phosphatidate cytidylyltransferase	SH01_07475, ,psos,Phosphatidate cytidylyltransferase	SH02_04905, ,psos,Phosphatidate cytidylyltransferase	SH03_01820, ,psos,Phosphatidate cytidylyltransferase	TP1_02060, ,psos,Phosphatidate cytidylyltransferase	TP2_07930, ,psos,Phosphatidate cytidylyltransferase	TP3_04650, ,psos,Phosphatidate cytidylyltransferase	TP4_11165, ,psos,Phosphatidate cytidylyltransferase	TP4479_00125, ,psos,Phosphatidate cytidylyltransferase	TP8_07045, ,psos,Phosphatidate cytidylyltransferase	TP_2849_02050, ,psos,Phosphatidate cytidylyltransferase	UFV1_04645, ,psos,Phosphatidate cytidylyltransferase	jx18_01785, ,psos,Phosphatidate cytidylyltransferase
379	TP6375_01960, ,psos,Ribosome-recycling factor	2012CQ_ZSH_09550, ,psos,Ribosome-recycling factor	Arash114_01960, ,psos,Ribosome-recycling factor	Bu5_03990, ,psos,Ribosome-recycling factor	DSM_20630_04925, ,psos,Ribosome-recycling factor	MS249_02575, ,psos,Ribosome-recycling factor	NCTC5224_06510, ,psos,Ribosome-recycling factor	SH01_07470, ,psos,Ribosome-recycling factor	SH02_04910, ,psos,Ribosome-recycling factor	SH03_01825, ,psos,Ribosome-recycling factor	TP1_02055, ,psos,Ribosome-recycling factor	TP2_07925, ,psos,Ribosome-recycling factor	TP3_04655, ,psos,Ribosome-recycling factor	TP4_11160, ,psos,Ribosome-recycling factor	TP4479_00130, ,psos,Ribosome-recycling factor	TP8_07050, ,psos,Ribosome-recycling factor	TP_2849_02055, ,psos,Ribosome-recycling factor	UFV1_04650, ,psos,Ribosome-recycling factor	jx18_01780, ,psos,Ribosome-recycling factor
380	TP6375_01965, ,psos,Uridylate kinase	2012CQ_ZSH_09555, ,psos,Uridylate kinase	Arash114_01965, ,psos,Uridylate kinase	Bu5_03985, ,psos,Uridylate kinase	DSM_20630_04920, ,psos,Uridylate kinase	MS249_02570, ,psos,Uridylate kinase	NCTC5224_06515, ,psos,Uridylate kinase	SH01_07465, ,psos,Uridylate kinase	SH02_04915, ,psos,Uridylate kinase	SH03_01830, ,psos,Uridylate kinase	TP1_02050, ,psos,Uridylate kinase	TP2_07920, ,psos,Uridylate kinase	TP3_04660, ,psos,Uridylate kinase	TP4_11155, ,psos,Uridylate kinase	TP4479_00135, ,psos,Uridylate kinase	TP8_07055, ,psos,Uridylate kinase	TP_2849_02060, ,psos,Uridylate kinase	UFV1_04655, ,psos,Uridylate kinase	jx18_01775, ,psos,Uridylate kinase
381	TP6375_01970, ,psos,Ribosome-associated heat shock protein Hsp15	2012CQ_ZSH_09560, ,psos,Ribosome-associated heat shock protein Hsp15	Arash114_01970, ,psos,Ribosome-associated heat shock protein Hsp15	- , -	DSM_20630_04915, ,psos,Ribosome-associated heat shock protein Hsp15	MS249_02565, ,psos,Ribosome-associated heat shock protein Hsp15	NCTC5224_06520, ,psos,Ribosome-associated heat shock protein Hsp15	SH01_07460, ,psos,Ribosome-associated heat shock protein Hsp15	SH02_04920, ,psos,Ribosome-associated heat shock protein Hsp15	SH03_01835, ,psos,Ribosome-associated heat shock protein Hsp15	TP1_02045, ,psos,Ribosome-associated heat shock protein Hsp15	TP2_07915, ,psos,Ribosome-associated heat shock protein Hsp15	TP3_04665, ,psos,Ribosome-associated heat shock protein Hsp15	TP4_11150, ,psos,Ribosome-associated heat shock protein Hsp15	TP4479_00140, ,psos,Ribosome-associated heat shock protein Hsp15	TP8_07060, ,psos,Ribosome-associated heat shock protein Hsp15	TP_2849_02065, ,psos,Ribosome-associated heat shock protein Hsp15	UFV1_04660, ,psos,Ribosome-associated heat shock protein Hsp15	jx18_01770, ,psos,Ribosome-associated heat shock protein Hsp15
382	TP6375_01975, ,psos,MFS transporter	2012CQ_ZSH_09565, ,psos,High-copy suppressor of rspA	Arash114_01975, ,psos,High-copy suppressor of rspA	Bu5_03980, ,psos,MFS transporter	DSM_20630_04910, ,psos,High-copy suppressor of rspA	MS249_02560, ,psos,MFS transporter	NCTC5224_06525, ,psos,High-copy suppressor of rspA	SH01_07455, ,psos,High-copy suppressor of rspA	SH02_04925, ,psos,High-copy suppressor of rspA	SH03_01840, ,psos,High-copy suppressor of rspA	TP1_02040, ,psos,High-copy suppressor of rspA	TP2_07910, ,psos,High-copy suppressor of rspA	TP3_04670, ,psos,High-copy suppressor of rspA	TP4_11145, ,psos,High-copy suppressor of rspA	TP4479_00145, ,psos,High-copy suppressor of rspA	TP8_07065, ,psos,High-copy suppressor of rspA	TP_2849_02070, ,psos,High-copy suppressor of rspA	UFV1_04665, ,psos,MFS transporter	jx18_01765, ,psos,High-copy suppressor of rspA
383	TP6375_01980, ,psos,Ferredoxin	2012CQ_ZSH_09570, ,psos,Ferredoxin	Arash114_01980, ,psos,Ferredoxin	Bu5_03975, ,psos,Ferredoxin	DSM_20630_04905, ,psos,Ferredoxin	MS249_02555, ,psos,Ferredoxin	NCTC5224_06530, ,psos,Ferredoxin	SH01_07450, ,psos,Ferredoxin	SH02_04930, ,psos,Ferredoxin	SH03_01845, ,psos,Ferredoxin	TP1_02035, ,psos,Ferredoxin	TP2_07905, ,psos,Ferredoxin	TP3_04675, ,psos,Ferredoxin	TP4_11140, ,psos,Ferredoxin	TP4479_00150, ,psos,Ferredoxin	TP8_07070, ,psos,Ferredoxin	TP_2849_02075, ,psos,Ferredoxin	UFV1_04420, ,psos,Ferredoxin	jx18_01760, ,psos,Ferredoxin
384	TP6375_01985, ,psos,Electron transfer flavoprotein-ubiquinone oxidoreductase	2012CQ_ZSH_09575, ,psos,Electron transfer flavoprotein-ubiquinone oxidoreductase	Arash114_01985, ,psos,Electron transfer flavoprotein-ubiquinone oxidoreductase	Bu5_03970, ,psos,Electron transfer flavoprotein-ubiquinone oxidoreductase	DSM_20630_04900, ,psos,Electron transfer flavoprotein-ubiquinone oxidoreductase	MS249_02550, ,psos,Electron transfer flavoprotein-ubiquinone oxidoreductase	NCTC5224_06535, ,psos,Electron transfer flavoprotein-ubiquinone oxidoreductase	SH01_07445, ,psos,Electron transfer flavoprotein-ubiquinone oxidoreductase	SH02_04935, ,psos,Electron transfer flavoprotein-ubiquinone oxidoreductase	SH03_01850, ,psos,Electron transfer flavoprotein-ubiquinone oxidoreductase	TP1_02030, ,psos,Electron transfer flavoprotein-ubiquinone oxidoreductase	TP2_07900, ,psos,Electron transfer flavoprotein-ubiquinone oxidoreductase	TP3_04680, ,psos,Electron transfer flavoprotein-ubiquinone oxidoreductase	TP4_11135, ,psos,Electron transfer flavoprotein-ubiquinone oxidoreductase	TP4479_00155, ,psos,Electron transfer flavoprotein-ubiquinone oxidoreductase	TP8_07075, ,psos,Electron transfer flavoprotein-ubiquinone oxidoreductase	TP_2849_02080, ,psos,Electron transfer flavoprotein-ubiquinone oxidoreductase	UFV1_04425, ,psos,Electron transfer flavoprotein-ubiquinone oxidoreductase	jx18_01755, ,psos,Electron transfer flavoprotein-ubiquinone oxidoreductase
385	TP6375_01990, ,psos,Electron transfer flavoprotein large subunit	2012CQ_ZSH_09580, ,psos,Electron transfer flavoprotein large subunit	Arash114_01990, ,psos,Electron transfer flavoprotein large subunit	Bu5_03965, ,psos,Electron transfer flavoprotein large subunit	DSM_20630_04895, ,psos,Electron transfer flavoprotein large subunit	MS249_02545, ,psos,Electron transfer flavoprotein large subunit	NCTC5224_06540, ,psos,Electron transfer flavoprotein large subunit	SH01_07440, ,psos,Electron transfer flavoprotein large subunit	SH02_04940, ,psos,Electron transfer flavoprotein large subunit	SH03_01855, ,psos,Electron transfer flavoprotein large subunit	TP1_02025, ,psos,Electron transfer flavoprotein large subunit	TP2_07895, ,psos,Electron transfer flavoprotein large subunit	TP3_04685, ,psos,Electron transfer flavoprotein large subunit	TP4_11130, ,psos,Electron transfer flavoprotein large subunit	TP4479_00160, ,psos,Electron transfer flavoprotein large subunit	TP8_07080, ,psos,Electron transfer flavoprotein large subunit	TP_2849_02085, ,psos,Electron transfer flavoprotein large subunit	UFV1_04430, ,psos,Electron transfer flavoprotein large subunit	jx18_01750, ,psos,Electron transfer flavoprotein large subunit
386	TP6375_01995, ,psos,Electron transfer flavoprotein beta subunit/FixA family protein	2012CQ_ZSH_09585, ,psos,Electron transfer flavoprotein beta subunit/FixA family protein	Arash114_01995, ,psos,Electron transfer flavoprotein beta subunit/FixA family protein	Bu5_03960, ,psos,Electron transfer flavoprotein beta subunit/FixA family protein	DSM_20630_04890, ,psos,Electron transfer flavoprotein beta subunit/FixA family protein	MS249_02540, ,psos,Electron transfer flavoprotein beta subunit/FixA family protein	NCTC5224_06545, ,psos,Electron transfer flavoprotein beta subunit/FixA family protein	SH01_07435, ,psos,Electron transfer flavoprotein beta subunit/FixA family protein	SH02_04945, ,psos,Electron transfer flavoprotein beta subunit/FixA family protein	SH03_01860, ,psos,Electron transfer flavoprotein beta subunit/FixA family protein	TP1_02020, ,psos,Electron transfer flavoprotein beta subunit/FixA family protein	TP2_07890, ,psos,Electron transfer flavoprotein beta subunit/FixA family protein	TP3_04690, ,psos,Electron transfer flavoprotein beta subunit/FixA family protein	TP4_11125, ,psos,Electron transfer flavoprotein beta subunit/FixA family protein	TP4479_00165, ,psos,Electron transfer flavoprotein beta subunit/FixA family protein	TP8_07085, ,psos,Electron transfer flavoprotein beta subunit/FixA family protein	TP_2849_02090, ,psos,Electron transfer flavoprotein beta subunit/FixA family protein	UFV1_04435, ,psos,Electron transfer flavoprotein beta subunit/FixA family protein	jx18_01745, ,psos,Electron transfer flavoprotein beta subunit/FixA family protein
387	TP6375_02000, ,psos,Elongation factor Ts	2012CQ_ZSH_09590, ,psos,Elongation factor Ts	Arash114_02000, ,psos,Elongation factor Ts	Bu5_03955, ,psos,Elongation factor Ts	DSM_20630_04885, ,psos,Elongation factor Ts	MS249_02535, ,psos,Elongation factor Ts	NCTC5224_06550, ,psos,Elongation factor Ts	SH01_07430, ,psos,Elongation factor Ts	SH02_04950, ,psos,Elongation factor Ts	SH03_01865, ,psos,Elongation factor Ts	TP1_02015, ,psos,Elongation factor Ts	TP2_07885, ,psos,Elongation factor Ts	TP3_04695, ,psos,Elongation factor Ts	TP4_11120, ,psos,Elongation factor Ts	TP4479_00170, ,psos,Elongation factor Ts	TP8_07090, ,psos,Elongation factor Ts	TP_2849_02095, ,psos,Elongation factor Ts	UFV1_04440, ,psos,Elongation factor Ts	jx18_01740, ,psos,Elongation factor Ts
388	TP6375_02005, ,psos,30S ribosomal protein S2	2012CQ_ZSH_09595, ,psos,30S ribosomal protein S2	Arash114_02005, ,psos,30S ribosomal protein S2	Bu5_03950, ,psos,30S ribosomal protein S2	DSM_20630_04880, ,psos,30S ribosomal protein S2	MS249_02530, ,psos,30S ribosomal protein S2	NCTC5224_06555, ,psos,30S ribosomal protein S2	SH01_07425, ,psos,30S ribosomal protein S2	SH02_04955, ,psos,30S ribosomal protein S2	SH03_01870, ,psos,30S ribosomal protein S2	TP1_02010, ,psos,30S ribosomal protein S2	TP2_07880, ,psos,30S ribosomal protein S2	TP3_04700, ,psos,30S ribosomal protein S2	TP4_11115, ,psos,30S ribosomal protein S2	TP4479_00175, ,psos,30S ribosomal protein S2	TP8_07095, ,psos,30S ribosomal protein S2	TP_2849_02100, ,psos,30S ribosomal protein S2	UFV1_04445, ,psos,30S ribosomal protein S2	jx18_01735, ,psos,30S ribosomal protein S2
389	TP6375_02010, ,psos,Predicted membrane protein	2012CQ_ZSH_09600, ,psos,Predicted membrane protein	Arash114_02010, ,psos,Predicted membrane protein	Bu5_03945, ,psos,Predicted membrane protein	DSM_20630_04875, ,psos,Predicted membrane protein	MS249_02525, ,psos,Predicted membrane protein	NCTC5224_06560, ,psos,Predicted membrane protein	SH01_07420, ,psos,Predicted membrane protein	SH02_04960, ,psos,Predicted membrane protein	SH03_01875, ,psos,Predicted membrane protein	TP1_02005, ,psos,Predicted membrane protein	TP2_07875, ,psos,Predicted membrane protein	TP3_04705, ,psos,Predicted membrane protein	TP4_11110, ,psos,Predicted membrane protein	TP4479_00180, ,psos,Predicted membrane protein	TP8_07100, ,psos,Predicted membrane protein	TP_2849_02105, ,psos,Predicted membrane protein	UFV1_04450, ,psos,Predicted membrane protein	jx18_01730, ,psos,Predicted membrane protein
390	TP6375_02015, ,psos,Peptidase_M23 domain-containing protein	2012CQ_ZSH_09605, ,psos,Peptidase_M23 domain-containing protein	Arash114_02015, ,psos,Peptidase_M23 domain-containing protein	Bu5_03940, ,psos,Peptidase_M23 domain-containing protein	DSM_20630_04870, ,psos,Peptidase_M23 domain-containing protein	MS249_02520, ,psos,Peptidase_M23 domain-containing protein	NCTC5224_06565, ,psos,Peptidase_M23 domain-containing protein	SH01_07415, ,psos,Peptidase_M23 domain-containing protein	SH02_04965, ,psos,Peptidase_M23 domain-containing protein	SH03_01880, ,psos,Peptidase_M23 domain-containing protein	TP1_02000, ,psos,Peptidase_M23 domain-containing protein	TP2_07870, ,psos,Peptidase_M23 domain-containing protein	TP3_04710, ,psos,Peptidase_M23 domain-containing protein	TP4_11105, ,psos,Peptidase_M23 domain-containing protein	TP4479_00185, ,psos,Peptidase_M23 domain-containing protein	TP8_07105, ,psos,Peptidase_M23 domain-containing protein	TP_2849_02110, ,psos,Peptidase_M23 domain-containing protein	UFV1_04455, ,psos,Peptidase_M23 domain-containing protein	jx18_01725, ,psos,Peptidase_M23 domain-containing protein
391	TP6375_02020, ,psos,Tyrosine recombinase XerC	2012CQ_ZSH_09610, ,psos,Tyrosine recombinase XerC	Arash114_02020, ,psos,Tyrosine recombinase XerC	Bu5_03935, ,psos,Tyrosine recombinase XerC	DSM_20630_04865, ,psos,Tyrosine recombinase XerC	MS249_02515, ,psos,Tyrosine recombinase XerC	NCTC5224_06570, ,psos,Tyrosine recombinase XerC	SH01_07410, ,psos,Tyrosine recombinase XerC	SH02_04970, ,psos,Tyrosine recombinase XerC	SH03_01885, ,psos,Tyrosine recombinase XerC	TP1_01995, ,psos,Tyrosine recombinase XerC	TP2_07865, ,psos,Tyrosine recombinase XerC	TP3_04715, ,psos,Tyrosine recombinase XerC	TP4_11100, ,psos,Tyrosine recombinase XerC	TP4479_00190, ,psos,Tyrosine recombinase XerC	TP8_07110, ,psos,Tyrosine recombinase XerC	TP_2849_02115, ,psos,Tyrosine recombinase XerC	UFV1_04460, ,psos,Tyrosine recombinase XerC	jx18_01720, ,psos,Tyrosine recombinase XerC
392	TP6375_02025, ,psos,DNA-protecting protein DprA	2012CQ_ZSH_09615, ,psos,DNA-protecting protein DprA	Arash114_02025, ,psos,DNA-protecting protein DprA	Bu5_03930, ,psos,DNA-protecting protein DprA	DSM_20630_04860, ,psos,DNA-protecting protein DprA	MS249_02510, ,psos,DNA-protecting protein DprA	NCTC5224_06575, ,psos,DNA-protecting protein DprA	SH01_07405, ,psos,DNA-protecting protein DprA	SH02_04975, ,psos,DNA-protecting protein DprA	SH03_01890, ,psos,DNA-protecting protein DprA	TP1_01990, ,psos,DNA-protecting protein DprA	TP2_07860, ,psos,DNA-protecting protein DprA	TP3_04720, ,psos,DNA-protecting protein DprA	TP4_11095, ,psos,DNA-protecting protein DprA	TP4479_00195, ,psos,DNA-protecting protein DprA	TP8_07115, ,psos,DNA-protecting protein DprA	TP_2849_02120, ,psos,DNA-protecting protein DprA	UFV1_04465, ,psos,DNA-protecting protein DprA	jx18_01715, ,psos,DNA-protecting protein DprA
393	TP6375_02030, ,psos,Competence protein ComM	2012CQ_ZSH_09620, ,psos,Competence protein ComM	Arash114_02030, ,psos,Competence protein ComM	Bu5_03925, ,psos,Competence protein ComM	DSM_20630_04855, ,psos,Competence protein ComM	MS249_02505, ,psos,Competence protein ComM	NCTC5224_06580, ,psos,Competence protein ComM	SH01_07400, ,psos,Competence protein ComM	SH02_04980, ,psos,Competence protein ComM	SH03_01895, ,psos,Competence protein ComM	TP1_01985, ,psos,Competence protein ComM	TP2_07855, ,psos,Competence protein ComM	TP3_04725, ,psos,Competence protein ComM	TP4_11090, ,psos,Competence protein ComM	TP4479_00200, ,psos,Competence protein ComM	TP8_07120, ,psos,Competence protein ComM	TP_2849_02125, ,psos,Competence protein ComM	UFV1_04470, ,psos,Competence protein ComM	jx18_01710, ,psos,Competence protein ComM
394	TP6375_02035, ,psos,UPF0102 protein DBV13_02045	2012CQ_ZSH_09625, ,psos,UPF0102 protein DBV13_02045	Arash114_02035, ,psos,UPF0102 protein DBV13_02045	Bu5_03920, ,psos,UPF0102 protein DBV13_02045	DSM_20630_04850, ,psos,UPF0102 protein DBV13_02045	MS249_02500, ,psos,UPF0102 protein DBV13_02045	NCTC5224_06585, ,psos,UPF0102 protein DBV13_02045	SH01_07395, ,psos,UPF0102 protein DBV13_02045	SH02_04985, ,psos,UPF0102 protein DBV13_02045	SH03_01900, ,psos,UPF0102 protein DBV13_02045	TP1_01980, ,psos,UPF0102 protein DBV13_02045	TP2_07850, ,psos,UPF0102 protein DBV13_02045	TP3_04730, ,psos,UPF0102 protein DBV13_02045	TP4_11085, ,psos,UPF0102 protein DBV13_02045	TP4479_00205, ,psos,UPF0102 protein DBV13_02045	TP8_07125, ,psos,UPF0102 protein DBV13_02045	TP_2849_02130, ,psos,UPF0102 protein DBV13_02045	UFV1_04475, ,psos,UPF0102 protein DBV13_02045	jx18_01705, ,psos,UPF0102 protein DBV13_02045
395	TP6375_02040, ,psos,DUF2469 domain-containing protein	2012CQ_ZSH_09630, ,psos,DUF2469 domain-containing protein	Arash114_02040, ,psos,DUF2469 domain-containing protein	Bu5_03915, ,psos,DUF2469 domain-containing protein	DSM_20630_04845, ,psos,DUF2469 domain-containing protein	MS249_02495, ,psos,DUF2469 domain-containing protein	NCTC5224_06590, ,psos,DUF2469 domain-containing protein	SH01_07390, ,psos,DUF2469 domain-containing protein	SH02_04990, ,psos,DUF2469 domain-containing protein	SH03_01905, ,psos,DUF2469 domain-containing protein	TP1_01975, ,psos,DUF2469 domain-containing protein	TP2_07845, ,psos,DUF2469 domain-containing protein	TP3_04735, ,psos,DUF2469 domain-containing protein	TP4_11080, ,psos,DUF2469 domain-containing protein	TP4479_00210, ,psos,DUF2469 domain-containing protein	TP8_07130, ,psos,DUF2469 domain-containing protein	TP_2849_02135, ,psos,DUF2469 domain-containing protein	UFV1_04480, ,psos,DUF2469 domain-containing protein	jx18_01700, ,psos,DUF2469 domain-containing protein
396	TP6375_02045, ,psos,Ribonuclease	2012CQ_ZSH_09635, ,psos,Ribonuclease	Arash114_02045, ,psos,Ribonuclease	Bu5_03910, ,psos,Ribonuclease	DSM_20630_04840, ,psos,Ribonuclease	MS249_02490, ,psos,Ribonuclease	NCTC5224_06595, ,psos,Ribonuclease	SH01_07385, ,psos,Ribonuclease	SH02_04995, ,psos,Ribonuclease	SH03_01910, ,psos,Ribonuclease	TP1_01970, ,psos,Ribonuclease	TP2_07840, ,psos,Ribonuclease	TP3_04740, ,psos,Ribonuclease	TP4_11075, ,psos,Ribonuclease	TP4479_00215, ,psos,Ribonuclease	TP8_07135, ,psos,Ribonuclease	TP_2849_02140, ,psos,Ribonuclease	UFV1_04485, ,psos,Ribonuclease	jx18_01695, ,psos,Ribonuclease
397	TP6375_02050, ,psos,Signal peptidase I	2012CQ_ZSH_09640, ,psos,Signal peptidase I	Arash114_02050, ,psos,Signal peptidase I	Bu5_03905, ,psos,Signal peptidase I	DSM_20630_04835, ,psos,Signal peptidase I	MS249_02485, ,psos,Signal peptidase I	NCTC5224_06600, ,psos,Signal peptidase I	SH01_07380, ,psos,Signal peptidase I	SH02_05000, ,psos,Signal peptidase I	SH03_01915, ,psos,Signal peptidase I	TP1_01965, ,psos,Signal peptidase I	TP2_07835, ,psos,Signal peptidase I	TP3_04745, ,psos,Signal peptidase I	TP4_11070, ,psos,Signal peptidase I	TP4479_00220, ,psos,Signal peptidase I	TP8_07140, ,psos,Signal peptidase I	TP_2849_02145, ,psos,Signal peptidase I	UFV1_04490, ,psos,Signal peptidase I	jx18_01690, ,psos,Signal peptidase I
398	TP6375_02055, ,psos,Magnesium transporter	- , -	Arash114_02055, ,psos,Magnesium transporter	- , -	- , -	- , -	- , -	- , -	- , -	- , -	- , -	- , -	- , -	- , -	- , -	- , -	- , -	UFV1_04495, ,psos,Magnesium transporter	- , -
399	TP6375_02060, ,psos,MgtC/SapB family protein	- , -	Arash114_02060, ,psos,MgtC/SapB family protein	- , -	- , -	- , -	- , -	- , -	- , -	- , -	- , -	- , -	- , -	- , -	- , -	- , -	- , -	UFV1_04500, ,psos,MgtC/SapB family protein	- , -
400	TP6375_02065, ,psos,50S ribosomal protein L19	2012CQ_ZSH_09645, ,psos,50S ribosomal protein L19	Arash114_02065, ,psos,50S ribosomal protein L19	Bu5_03900, ,psos,50S ribosomal protein L19	DSM_20630_04830, ,psos,50S ribosomal protein L19	MS249_02480, ,psos,50S ribosomal protein L19	NCTC5224_06605, ,psos,50S ribosomal protein L19	SH01_07375, ,psos,50S ribosomal protein L19	SH02_05005, ,psos,50S ribosomal protein L19	SH03_01920, ,psos,50S ribosomal protein L19	TP1_01960, ,psos,50S ribosomal protein L19	TP2_07830, ,psos,50S ribosomal protein L19	TP3_04750, ,psos,50S ribosomal protein L19	TP4_11065, ,psos,50S ribosomal protein L19	TP4479_00225, ,psos,50S ribosomal protein L19	TP8_07145, ,psos,50S ribosomal protein L19	TP_2849_02150, ,psos,50S ribosomal protein L19	UFV1_04505, ,psos,50S ribosomal protein L19	jx18_01685, ,psos,50S ribosomal protein L19
401	TP6375_02070, ,psos,tRNA (guanine-N(1)-)-methyltransferase	2012CQ_ZSH_09650, ,psos,tRNA (guanine-N(1)-)-methyltransferase	Arash114_02070, ,psos,tRNA (guanine-N(1)-)-methyltransferase	Bu5_03895, ,psos,tRNA (guanine-N(1)-)-methyltransferase	DSM_20630_04825, ,psos,tRNA (guanine-N(1)-)-methyltransferase	MS249_02475, ,psos,tRNA (guanine-N(1)-)-methyltransferase	NCTC5224_06610, ,psos,tRNA (guanine-N(1)-)-methyltransferase	SH01_07370, ,psos,tRNA (guanine-N(1)-)-methyltransferase	SH02_05010, ,psos,tRNA (guanine-N(1)-)-methyltransferase	SH03_01925, ,psos,tRNA (guanine-N(1)-)-methyltransferase	TP1_01955, ,psos,tRNA (guanine-N(1)-)-methyltransferase	TP2_07825, ,psos,tRNA (guanine-N(1)-)-methyltransferase	TP3_04755, ,psos,tRNA (guanine-N(1)-)-methyltransferase	TP4_11060, ,psos,tRNA (guanine-N(1)-)-methyltransferase	TP4479_00230, ,psos,tRNA (guanine-N(1)-)-methyltransferase	TP8_07150, ,psos,tRNA (guanine-N(1)-)-methyltransferase	TP_2849_02155, ,psos,tRNA (guanine-N(1)-)-methyltransferase	UFV1_04510, ,psos,tRNA (guanine-N(1)-)-methyltransferase	jx18_01680, ,psos,tRNA (guanine-N(1)-)-methyltransferase
402	TP6375_02075, ,psos,Ribosome maturation factor RimM	2012CQ_ZSH_09655, ,psos,Ribosome maturation factor RimM	Arash114_02075, ,psos,Ribosome maturation factor RimM	Bu5_03890, ,psos,Ribosome maturation factor RimM	DSM_20630_04820, ,psos,Ribosome maturation factor RimM	MS249_02470, ,psos,Ribosome maturation factor RimM	NCTC5224_06615, ,psos,Ribosome maturation factor RimM	SH01_07365, ,psos,Ribosome maturation factor RimM	SH02_05015, ,psos,Ribosome maturation factor RimM	SH03_01930, ,psos,Ribosome maturation factor RimM	TP1_01950, ,psos,Ribosome maturation factor RimM	TP2_07820, ,psos,Ribosome maturation factor RimM	TP3_04760, ,psos,Ribosome maturation factor RimM	TP4_11055, ,psos,Ribosome maturation factor RimM	TP4479_00235, ,psos,Ribosome maturation factor RimM	TP8_07155, ,psos,Ribosome maturation factor RimM	TP_2849_02160, ,psos,Ribosome maturation factor RimM	UFV1_04515, ,psos,Ribosome maturation factor RimM	jx18_01675, ,psos,Ribosome maturation factor RimM
403	TP6375_02080, ,psos,UPF0109 protein Arch_0569	2012CQ_ZSH_09660, ,psos,UPF0109 protein Arch_0569	Arash114_02080, ,psos,UPF0109 protein Arch_0569	Bu5_03885, ,psos,UPF0109 protein Arch_0569	DSM_20630_04815, ,psos,UPF0109 protein Arch_0569	MS249_02465, ,psos,UPF0109 protein Arch_0569	NCTC5224_06620, ,psos,UPF0109 protein Arch_0569	SH01_07360, ,psos,UPF0109 protein Arch_0569	SH02_05020, ,psos,UPF0109 protein Arch_0569	SH03_01935, ,psos,UPF0109 protein Arch_0569	TP1_01945, ,psos,UPF0109 protein Arch_0569	TP2_07815, ,psos,UPF0109 protein Arch_0569	TP3_04765, ,psos,UPF0109 protein Arch_0569	TP4_11050, ,psos,UPF0109 protein Arch_0569	TP4479_00240, ,psos,UPF0109 protein Arch_0569	TP8_07160, ,psos,UPF0109 protein Arch_0569	TP_2849_02165, ,psos,UPF0109 protein Arch_0569	UFV1_04520, ,psos,UPF0109 protein Arch_0569	jx18_01670, ,psos,UPF0109 protein Arch_0569
404	TP6375_02085, ,psos,30S ribosomal protein S16	2012CQ_ZSH_09665, ,psos,30S ribosomal protein S16	Arash114_02085, ,psos,30S ribosomal protein S16	Bu5_03880, ,psos,30S ribosomal protein S16	DSM_20630_04810, ,psos,30S ribosomal protein S16	MS249_02460, ,psos,30S ribosomal protein S16	NCTC5224_06625, ,psos,30S ribosomal protein S16	SH01_07355, ,psos,30S ribosomal protein S16	SH02_05025, ,psos,30S ribosomal protein S16	SH03_01940, ,psos,30S ribosomal protein S16	TP1_01940, ,psos,30S ribosomal protein S16	TP2_07810, ,psos,30S ribosomal protein S16	TP3_04770, ,psos,30S ribosomal protein S16	TP4_11045, ,psos,30S ribosomal protein S16	TP4479_00245, ,psos,30S ribosomal protein S16	TP8_07165, ,psos,30S ribosomal protein S16	TP_2849_02170, ,psos,30S ribosomal protein S16	- , -	jx18_01665, ,psos,30S ribosomal protein S16
405	TP6375_02090, ,psos,Ferrous-iron efflux pump FieF	2012CQ_ZSH_09670, ,psos,Ferrous-iron efflux pump FieF	Arash114_02090, ,psos,Ferrous-iron efflux pump FieF	Bu5_03875, ,psos,Ferrous-iron efflux pump FieF	DSM_20630_04805, ,psos,Ferrous-iron efflux pump FieF	MS249_02455, ,psos,Ferrous-iron efflux pump FieF	NCTC5224_06630, ,psos,Ferrous-iron efflux pump FieF	SH01_07350, ,psos,Ferrous-iron efflux pump FieF	SH02_05030, ,psos,Ferrous-iron efflux pump FieF	SH03_01945, ,psos,Ferrous-iron efflux pump FieF	TP1_01935, ,psos,Ferrous-iron efflux pump FieF	TP2_07805, ,psos,Ferrous-iron efflux pump FieF	TP3_04775, ,psos,Ferrous-iron efflux pump FieF	TP4_11040, ,psos,Ferrous-iron efflux pump FieF	TP4479_00250, ,psos,Ferrous-iron efflux pump FieF	TP8_07170, ,psos,Ferrous-iron efflux pump FieF	TP_2849_02175, ,psos,Ferrous-iron efflux pump FieF	UFV1_04375, ,psos,Ferrous-iron efflux pump FieF	jx18_01660, ,psos,Ferrous-iron efflux pump FieF
406	TP6375_02095, ,psos,Menaquinone-dependent protoporphyrinogen IX dehydrogenase	2012CQ_ZSH_09675, ,psos,Menaquinone-dependent protoporphyrinogen IX dehydrogenase	Arash114_02095, ,psos,Menaquinone-dependent protoporphyrinogen IX dehydrogenase	Bu5_03870, ,psos,Menaquinone-dependent protoporphyrinogen IX dehydrogenase	DSM_20630_04800, ,psos,Menaquinone-dependent protoporphyrinogen IX dehydrogenase	MS249_02450, ,psos,Menaquinone-dependent protoporphyrinogen IX dehydrogenase	NCTC5224_06635, ,psos,Menaquinone-dependent protoporphyrinogen IX dehydrogenase	SH01_07345, ,psos,Menaquinone-dependent protoporphyrinogen IX dehydrogenase	SH02_05035, ,psos,Menaquinone-dependent protoporphyrinogen IX dehydrogenase	SH03_01950, ,psos,Menaquinone-dependent protoporphyrinogen IX dehydrogenase	TP1_01930, ,psos,Menaquinone-dependent protoporphyrinogen IX dehydrogenase	TP2_07800, ,psos,Menaquinone-dependent protoporphyrinogen IX dehydrogenase	TP3_04780, ,psos,Menaquinone-dependent protoporphyrinogen IX dehydrogenase	TP4_11035, ,psos,Menaquinone-dependent protoporphyrinogen IX dehydrogenase	TP4479_00255, ,psos,Menaquinone-dependent protoporphyrinogen IX dehydrogenase	TP8_07175, ,psos,Menaquinone-dependent protoporphyrinogen IX dehydrogenase	TP_2849_02180, ,psos,Menaquinone-dependent protoporphyrinogen IX dehydrogenase	UFV1_04380, ,psos,Menaquinone-dependent protoporphyrinogen IX dehydrogenase	jx18_01655, ,psos,Menaquinone-dependent protoporphyrinogen IX dehydrogenase
407	TP6375_02100, ,psos,Amidohydro-rel domain-containing protein	2012CQ_ZSH_09680, ,psos,Amidohydro-rel domain-containing protein	Arash114_02100, ,psos,Amidohydro-rel domain-containing protein	Bu5_03865, ,psos,Amidohydro-rel domain-containing protein	DSM_20630_04795, ,psos,Amidohydro-rel domain-containing protein	MS249_02445, ,psos,Amidohydro-rel domain-containing protein	NCTC5224_06640, ,psos,Amidohydro-rel domain-containing protein	SH01_07340, ,psos,Amidohydro-rel domain-containing protein	SH02_05040, ,psos,Amidohydro-rel domain-containing protein	SH03_01955, ,psos,Amidohydro-rel domain-containing protein	TP1_01925, ,psos,Amidohydro-rel domain-containing protein	TP2_07795, ,psos,Amidohydro-rel domain-containing protein	TP3_04785, ,psos,Amidohydro-rel domain-containing protein	TP4_11030, ,psos,Amidohydro-rel domain-containing protein	TP4479_00260, ,psos,Amidohydro-rel domain-containing protein	TP8_07180, ,psos,Amidohydro-rel domain-containing protein	TP_2849_02185, ,psos,Amidohydro-rel domain-containing protein	UFV1_04385, ,psos,Amidohydro-rel domain-containing protein	jx18_01650, ,psos,Amidohydro-rel domain-containing protein
408	TP6375_02105, ,psos,Signal recognition particle protein	2012CQ_ZSH_09685, ,psos,Signal recognition particle protein	Arash114_02105, ,psos,Signal recognition particle protein	Bu5_03860, ,psos,signal recognition particle protein	DSM_20630_04790, ,psos,Signal recognition particle protein	MS249_02440, ,psos,Signal recognition particle protein	NCTC5224_06645, ,psos,Signal recognition particle protein	SH01_07335, ,psos,Signal recognition particle protein	SH02_05045, ,psos,Signal recognition particle protein	SH03_01960, ,psos,Signal recognition particle protein	TP1_01920, ,psos,Signal recognition particle protein	TP2_07790, ,psos,Signal recognition particle protein	TP3_04790, ,psos,Signal recognition particle protein	TP4_11025, ,psos,Signal recognition particle protein	TP4479_00265, ,psos,Signal recognition particle protein	TP8_07185, ,psos,signal recognition particle protein	TP_2849_02190, ,psos,Signal recognition particle protein	UFV1_04390, ,psos,Signal recognition particle protein	jx18_01645, ,psos,Signal recognition particle protein
409	TP6375_02110, ,psos,Signal recognition particle receptor FtsY	2012CQ_ZSH_09690, ,psos,Signal recognition particle receptor FtsY	Arash114_02110, ,psos,Signal recognition particle receptor FtsY	Bu5_03855, ,psos,signal recognition particle-docking protein FtsY	DSM_20630_04785, ,psos,Signal recognition particle receptor FtsY	MS249_02435, ,psos,Signal recognition particle receptor FtsY	NCTC5224_06650, ,psos,Signal recognition particle receptor FtsY	SH01_07330, ,psos,Signal recognition particle receptor FtsY	SH02_05050, ,psos,Signal recognition particle receptor FtsY	SH03_01965, ,psos,Signal recognition particle receptor FtsY	TP1_01915, ,psos,Signal recognition particle receptor FtsY	TP2_07785, ,psos,Signal recognition particle receptor FtsY	TP3_04795, ,psos,Signal recognition particle receptor FtsY	TP4_11020, ,psos,Signal recognition particle receptor FtsY	TP4479_00270, ,psos,Signal recognition particle receptor FtsY	TP8_07190, ,psos,Signal recognition particle receptor FtsY	TP_2849_02195, ,psos,Signal recognition particle receptor FtsY	UFV1_04395, ,psos,Signal recognition particle receptor FtsY	jx18_01640, ,psos,Signal recognition particle receptor FtsY
410	TP6375_02115, ,psos,hypothetical protein	- , -	Arash114_02115, ,psos,hypothetical protein	- , -	- , -	MS249_02430, ,psos,hypothetical protein	- , -	- , -	- , -	- , -	TP1_01910, ,psos,hypothetical protein	TP2_07780, ,psos,hypothetical protein	- , -	- , -	- , -	- , -	- , -	UFV1_04400, ,psos,hypothetical protein	- , -
411	TP6375_02120, ,psos,cholesterol-dependent cytolysin pyolysin	2012CQ_ZSH_09695, ,psos,cholesterol-dependent cytolysin pyolysin	Arash114_02120, ,psos,cholesterol-dependent cytolysin pyolysin	Bu5_03850, ,psos,thiol-activated cytolysin family protein	DSM_20630_04780, ,psos,cholesterol-dependent cytolysin pyolysin	MS249_02425, ,psos,cholesterol-dependent cytolysin pyolysin	NCTC5224_06655, ,psos,cholesterol-dependent cytolysin pyolysin	SH01_07325, ,psos,cholesterol-dependent cytolysin pyolysin	SH02_05055, ,psos,cholesterol-dependent cytolysin pyolysin	SH03_01970, ,psos,cholesterol-dependent cytolysin pyolysin	TP1_01905, ,psos,cholesterol-dependent cytolysin pyolysin	TP2_07775, ,psos,cholesterol-dependent cytolysin pyolysin	TP3_04800, ,psos,cholesterol-dependent cytolysin pyolysin	TP4_11015, ,psos,cholesterol-dependent cytolysin pyolysin	TP4479_00275, ,psos,cholesterol-dependent cytolysin pyolysin	TP8_07195, ,psos,cholesterol-dependent cytolysin pyolysin	TP_2849_02200, ,psos,cholesterol-dependent cytolysin pyolysin	UFV1_04405, ,psos,cholesterol-dependent cytolysin pyolysin	jx18_01635, ,psos,cholesterol-dependent cytolysin pyolysin
412	TP6375_02125, ,psos,hypothetical protein	2012CQ_ZSH_09700, ,psos,hypothetical protein	Arash114_02125, ,psos,hypothetical protein	Bu5_03845, ,psos,hypothetical protein	DSM_20630_04775, ,psos,hypothetical protein	MS249_02420, ,psos,hypothetical protein	NCTC5224_06660, ,psos,hypothetical protein	SH01_07320, ,psos,hypothetical protein	SH02_05060, ,psos,hypothetical protein	SH03_01975, ,psos,hypothetical protein	TP1_01900, ,psos,hypothetical protein	TP2_07770, ,psos,hypothetical protein	TP3_04805, ,psos,hypothetical protein	TP4_11010, ,psos,hypothetical protein	TP4479_00280, ,psos,hypothetical protein	TP8_07200, ,psos,hypothetical protein	TP_2849_02205, ,psos,hypothetical protein	UFV1_04410, ,psos,hypothetical protein	jx18_01630, ,psos,hypothetical protein
[truncated: 2,802 more rows]
