# Supplementary material for: Comparative Genome Analysis of 19 Trueperella pyogenes Strains Originating from Different Animal Species Reveal a Genetically Diverse Open Pan-Genome
Source: Antibiotics (Basel). 2022 Dec 24;12(1):24. doi: 10.3390/antibiotics12010024 (PMC9854608; doi:10.3390/antibiotics12010024)
Supplement: Supplementary file 1 [file antibiotics-12-00024-s001.zip › Table S5a-s_Singletons.xlsx]

## Sheet: S4 a-s
Suppl Table 5 (a) Strain specific genes detected in the T.pyogenes 2012CQ-ZSH.
S.No	Singleton:	Protein:
1	2012CQ_ZSH_01155	DNA-binding protein
2	2012CQ_ZSH_02045	flavodoxin family protein
3	2012CQ_ZSH_06675	helix-turn-helix domain-containing protein
4	2012CQ_ZSH_02065	hypothetical protein
5	2012CQ_ZSH_08590	hypothetical protein
6	2012CQ_ZSH_06630	hypothetical protein
7	2012CQ_ZSH_01160	hypothetical protein
8	2012CQ_ZSH_10245	hypothetical protein
9	2012CQ_ZSH_02015	hypothetical protein
10	2012CQ_ZSH_02095	hypothetical protein
11	2012CQ_ZSH_06650	hypothetical protein
12	2012CQ_ZSH_06645	hypothetical protein
13	2012CQ_ZSH_10305	hypothetical protein
14	2012CQ_ZSH_02090	hypothetical protein
15	2012CQ_ZSH_02010	hypothetical protein
16	2012CQ_ZSH_02085	hypothetical protein
17	2012CQ_ZSH_06635	hypothetical protein
18	2012CQ_ZSH_10290	hypothetical protein
19	2012CQ_ZSH_01175	hypothetical protein
20	2012CQ_ZSH_06640	hypothetical protein
21	2012CQ_ZSH_06655	hypothetical protein
22	2012CQ_ZSH_02055	lichenicidin A2 family type 2 lantibiotic
23	2012CQ_ZSH_02060	mersacidin family lantibiotic
24	2012CQ_ZSH_06615	N-6 DNA methylase
25	2012CQ_ZSH_02040	peptidase domain-containing ABC transporter
26	2012CQ_ZSH_06625	recombinase family protein
27	2012CQ_ZSH_02080	restriction endonuclease subunit S
28	2012CQ_ZSH_06620	restriction endonuclease subunit S
29	2012CQ_ZSH_02895	transposase
30	2012CQ_ZSH_02050	type 2 lantipeptide synthetase LanM
Suppl Table 5 (b) Strain specific genes detected in the T.pyogenes Arash114.
S.No	Singleton:	Protein:
1	Arash114_05535	hypothetical protein
2	Arash114_07305	hypothetical protein
Suppl Table 5 (c) Strain specific genes detected in the T.pyogenes jx18.
S.No	Singleton:	Protein:
1	jx18_09555	Competence protein TfoX
2	jx18_09450	Dam family site-specific DNA-(adenine-N6)-methyltransferase
3	jx18_07890	DUF3800 domain-containing protein
4	jx18_07865	helix-turn-helix domain-containing protein
5	jx18_09455	helix-turn-helix domain-containing protein
6	jx18_09505	hypothetical protein
7	jx18_00925	hypothetical protein
8	jx18_07880	hypothetical protein
9	jx18_07295	hypothetical protein
10	jx18_09445	hypothetical protein
11	jx18_05335	hypothetical protein
12	jx18_05590	hypothetical protein
13	jx18_09460	site-specific DNA-methyltransferase
14	jx18_05420	TetW-regulatory peptide
Suppl Table 5 (d) Strain specific genes detected in the T.pyogenes TP1.
S.No	Singleton:	Protein:
1	TP1_10645	GNAT family N-acetyltransferase
2	TP1_04930	hypothetical protein
3	TP1_10790	hypothetical protein
4	TP1_10435	hypothetical protein
5	TP1_00195	hypothetical protein
6	TP1_00040	hypothetical protein
7	TP1_10890	hypothetical protein
8	TP1_10885	hypothetical protein
9	TP1_03180	hypothetical protein
10	TP1_10965	hypothetical protein
11	TP1_04935	hypothetical protein
12	TP1_00030	hypothetical protein
13	TP1_10765	hypothetical protein
14	TP1_00230	hypothetical protein
15	TP1_10800	hypothetical protein
16	TP1_00025	hypothetical protein
17	TP1_10455	hypothetical protein
18	TP1_01770	isoprenylcysteine carboxylmethyltransferase family protein
19	TP1_00225	site-specific DNA-methyltransferase
20	TP1_10465	TIGR02391 family protein
21	TP1_04925	transcriptional regulator
22	TP1_01765	type II toxin-antitoxin system RelB/DinJ family antitoxin
Suppl Table 5 (e) Strain specific genes detected in the T.pyogenes TP2.
S.No	Singleton:	Protein:
1	TP2_02890	ABC transporter permease
2	TP2_07425	hypothetical protein
3	TP2_02915	hypothetical protein
4	TP2_02035	hypothetical protein
5	TP2_02885	hypothetical protein
6	TP2_02905	hypothetical protein
7	TP2_02900	hypothetical protein
8	TP2_02910	hypothetical protein
Suppl Table 5 (f) Strain specific genes detected in the T.pyogenes TP3.
NO SINGLETONS FOUND
Suppl Table 5 (g) Strain specific genes detected in the T.pyogenes TP4.
S.No	Singleton:	Protein:
1	TP4_06615	AIPR protein
2	TP4_02900	Helix-turn-helix domain-containing protein
3	TP4_02990	hypothetical protein
4	TP4_02960	hypothetical protein
5	TP4_03780	hypothetical protein
6	TP4_02905	hypothetical protein
7	TP4_02940	hypothetical protein
8	TP4_02945	hypothetical protein
9	TP4_02975	hypothetical protein
10	TP4_02950	hypothetical protein
11	TP4_03005	hypothetical protein
12	TP4_03785	Methyltransferase domain-containing protein
13	TP4_02955	PDDEXK_1 domain-containing protein
14	TP4_02970	Prim-Pol domain-containing protein
Suppl Table 5 (h) Strain specific genes detected in the T.pyogenes TP8.
S.No	Singleton:	Protein:
1	TP8_03430	cupin domain-containing protein
2	TP8_03425	DNA/RNA nuclease SfsA
3	TP8_04035	DUF2335 domain-containing protein
4	TP8_04100	DUF3168 domain-containing protein
5	TP8_04075	DUF5309 family protein
6	TP8_03935	helix-turn-helix domain-containing protein
7	TP8_03940	helix-turn-helix transcriptional regulator
8	TP8_03930	hypothetical protein
9	TP8_10090	hypothetical protein
10	TP8_04060	hypothetical protein
11	TP8_08575	hypothetical protein
12	TP8_04065	hypothetical protein
13	TP8_04010	hypothetical protein
14	TP8_10145	hypothetical protein
15	TP8_10535	hypothetical protein
16	TP8_04045	hypothetical protein
17	TP8_04090	hypothetical protein
18	TP8_04070	hypothetical protein
19	TP8_03995	hypothetical protein
20	TP8_07825	hypothetical protein
21	TP8_04095	hypothetical protein
22	TP8_10465	hypothetical protein
23	TP8_04085	hypothetical protein
24	TP8_03990	hypothetical protein
25	TP8_06320	hypothetical protein
26	TP8_03925	hypothetical protein
27	TP8_04080	hypothetical protein
28	TP8_04110	hypothetical protein
29	TP8_03880	hypothetical protein
30	TP8_04120	tape measure protein
31	TP8_04050	terminase
32	TP8_03435	TetR/AcrR family transcriptional regulator
Suppl Table 5 (i) Strain specific genes detected in the T.pyogenes TP6375.
	NO SINGLETONS FOUND
Suppl Table 5 (j) Strain specific genes detected in the T.pyogenes TP4479.
	NO SINGLETONS FOUND
Suppl Table 5 (k) Strain specific genes detected in the T.pyogenes TP2849.
	NO SINGLETONS FOUND
Suppl Table 5 (l) Strain specific genes detected in the T.pyogenes MS249.
S.No	Singleton:	Protein:
1	MS249_00865	AAA family ATPase
2	MS249_04390	CRISPR-associated helicase/endonuclease Cas3
3	MS249_07860	hypothetical protein
4	MS249_07855	hypothetical protein
5	MS249_09070	hypothetical protein
6	MS249_09985	hypothetical protein
7	MS249_08500	hypothetical protein
8	MS249_08025	hypothetical protein
9	MS249_03860	hypothetical protein
10	MS249_04170	hypothetical protein
11	MS249_07470	hypothetical protein
12	MS249_00545	hypothetical protein
13	MS249_09960	hypothetical protein
14	MS249_00550	hypothetical protein
15	MS249_09650	hypothetical protein
16	MS249_05200	hypothetical protein
17	MS249_08030	hypothetical protein
18	MS249_00860	hypothetical protein
19	MS249_09795	hypothetical protein
20	MS249_10175	hypothetical protein
21	MS249_08495	hypothetical protein
22	MS249_09460	hypothetical protein
23	MS249_00880	hypothetical protein
24	MS249_02985	hypothetical protein
25	MS249_07730	hypothetical protein
26	MS249_09075	hypothetical protein
27	MS249_08675	hypothetical protein
28	MS249_03960	hypothetical protein
29	MS249_10115	hypothetical protein
30	MS249_07980	hypothetical protein
31	MS249_00875	hypothetical protein
32	MS249_08545	hypothetical protein
33	MS249_09435	hypothetical protein
34	MS249_00995	hypothetical protein
35	MS249_09910	hypothetical protein
36	MS249_07865	hypothetical protein
37	MS249_09875	hypothetical protein
38	MS249_01000	hypothetical protein
39	MS249_01015	hypothetical protein
40	MS249_09800	hypothetical protein
41	MS249_00885	hypothetical protein
42	MS249_00855	hypothetical protein
43	MS249_02120	hypothetical protein
44	MS249_06775	hypothetical protein
45	MS249_03835	hypothetical protein
46	MS249_00925	hypothetical protein
47	MS249_06770	hypothetical protein
48	MS249_09355	hypothetical protein
49	MS249_03840	hypothetical protein
50	MS249_03830	hypothetical protein
51	MS249_09270	hypothetical protein
52	MS249_09790	hypothetical protein
53	MS249_07155	hypothetical protein
54	MS249_09440	hypothetical protein
55	MS249_03850	IS3 family transposase
56	MS249_00890	site-specific integrase
57	MS249_03845	Transposase
58	MS249_04380	type I-E CRISPR-associated endoribonuclease Cas2
59	MS249_04415	type I-E CRISPR-associated protein Cas5/CasD
60	MS249_04395	type I-E CRISPR-associated protein Cas6/Cse3/CasE
61	MS249_04410	type I-E CRISPR-associated protein Cas7/Cse4/CasC
62	MS249_04400	type I-E CRISPR-associated protein Cse1/CasA
63	MS249_04405	type I-E CRISPR-associated protein Cse2/CasB
Suppl Table 5 (m) Strain specific genes detected in the T.pyogenes UFV1.
S.No	Singleton:	Protein:
1	UFV1_05970	hypothetical protein
2	UFV1_07385	hypothetical protein
3	UFV1_01260	hypothetical protein
4	UFV1_08550	hypothetical protein
5	UFV1_06880	hypothetical protein
6	UFV1_06870	hypothetical protein
7	UFV1_08555	hypothetical protein
8	UFV1_05965	hypothetical protein
9	UFV1_01130	hypothetical protein
10	UFV1_04360	hypothetical protein
11	UFV1_01450	hypothetical protein
12	UFV1_09740	hypothetical protein
13	UFV1_06440	hypothetical protein
14	UFV1_08540	hypothetical protein
15	UFV1_04265	hypothetical protein
16	UFV1_04260	hypothetical protein
17	UFV1_06885	hypothetical protein
18	UFV1_02035	hypothetical protein
19	UFV1_05360	hypothetical protein
20	UFV1_04365	hypothetical protein
21	UFV1_00870	hypothetical protein
22	UFV1_06650	hypothetical protein
23	UFV1_09835	hypothetical protein
24	UFV1_01445	hypothetical protein
25	UFV1_09830	hypothetical protein
26	UFV1_06875	hypothetical protein
27	UFV1_09180	hypothetical protein
28	UFV1_08645	hypothetical protein
29	UFV1_06435	hypothetical protein
30	UFV1_06655	hypothetical protein
31	UFV1_02040	hypothetical protein
32	UFV1_05365	hypothetical protein
33	UFV1_06500	hypothetical protein
34	UFV1_05140	hypothetical protein
Suppl Table 5 (n) Strain specific genes detected in the T.pyogenes SH02.
S.No	Singleton:	Protein:
1	SH02_10630	3-oxoacyl-ACP synthase
2	SH02_10625	CDP-diacylglycerol--glycerol-3-phosphate 3-phosphatidyltransferase
3	SH02_10665	FAD-dependent monooxygenase
4	SH02_10685	hypothetical protein
5	SH02_10775	hypothetical protein
6	SH02_10510	hypothetical protein
7	SH02_10780	hypothetical protein
8	SH02_10615	hypothetical protein
9	SH02_07415	hypothetical protein
10	SH02_10675	hypothetical protein
11	SH02_10690	hypothetical protein
12	SH02_10605	hypothetical protein
13	SH02_10785	hypothetical protein
14	SH02_10635	TetR family transcriptional regulator
15	SH02_10620	VTT domain-containing protein
Suppl Table 5 (o) Strain specific genes detected in the T.pyogenes SH01.
S.No	Singleton:	Protein:
1	SH01_06230	aminoglycoside O-phosphotransferase APH(3)-Ia
2	SH01_04935	aminoglycoside O-phosphotransferase APH(3)-Ib
3	SH01_04930	aminoglycoside O-phosphotransferase APH(6)-Id
4	SH01_04920	chloramphenicol efflux MFS transporter Cmx
5	SH01_03110	DNA cytosine methyltransferase
6	SH01_09870	FadR family transcriptional regulator
7	SH01_09865	glycerate kinase
8	SH01_07580	hypothetical protein
9	SH01_10170	hypothetical protein
10	SH01_04940	hypothetical protein
11	SH01_09875	hypothetical protein
12	SH01_03445	hypothetical protein
13	SH01_03290	hypothetical protein
14	SH01_04870	hypothetical protein
15	SH01_03115	hypothetical protein
16	SH01_04975	hypothetical protein
17	SH01_03295	hypothetical protein
18	SH01_05990	hypothetical protein
19	SH01_09830	hypothetical protein
20	SH01_04970	hypothetical protein
21	SH01_03160	hypothetical protein
22	SH01_03385	IS481 family transposase
23	SH01_06225	IS481 family transposase
24	SH01_09880	NAD(P)-dependent oxidoreductase
25	SH01_04875	Resolvase/invertase-type recombinase catalytic domain-containing protein
26	SH01_04925	TnpNF
27	SH01_03390	Transposase
Suppl Table 5 (p) Strain specific genes detected in the T.pyogenes DSM20630.
S.No	Singleton:	Protein:
1	DSM_20630_08700	hypothetical protein
2	DSM_20630_08905	hypothetical protein
3	DSM_20630_08040	hypothetical protein
4	DSM_20630_09505	hypothetical protein
5	DSM_20630_09570	hypothetical protein
6	DSM_20630_09860	hypothetical protein
7	DSM_20630_09790	hypothetical protein
8	DSM_20630_09125	hypothetical protein
9	DSM_20630_01665	hypothetical protein
10	DSM_20630_09625	hypothetical protein
11	DSM_20630_08045	hypothetical protein
12	DSM_20630_09130	hypothetical protein
13	DSM_20630_09865	hypothetical protein
14	DSM_20630_06585	hypothetical protein
15	DSM_20630_07270	hypothetical protein
16	DSM_20630_10020	hypothetical protein
17	DSM_20630_08695	hypothetical protein
18	DSM_20630_06590	hypothetical protein
Suppl Table 5 (q) Strain specific genes detected in the T.pyogenes Bu5.
S.No	Singleton:	Protein:
1	Bu5_00790	helix-turn-helix domain-containing protein
2	Bu5_00765	helix-turn-helix transcriptional regulator
3	Bu5_00450	hypothetical protein
4	Bu5_06225	hypothetical protein
5	Bu5_10015	hypothetical protein
6	Bu5_02565	hypothetical protein
7	Bu5_09290	hypothetical protein
8	Bu5_00745	hypothetical protein
9	Bu5_00775	hypothetical protein
10	Bu5_00770	hypothetical protein
11	Bu5_02915	hypothetical protein
12	Bu5_09300	IS256 family transposase
13	Bu5_06585	putative DNA binding domain-containing protein
14	Bu5_00740	Resolvase, N-terminal domain / recombinase multi-domain protein
15	Bu5_02125	restriction endonuclease
16	Bu5_00760	restriction endonuclease subunit S
	Bu5_00755	Site-specific DNA-methyltransferase (adenine-specific)
Suppl Table 5 (r) Strain specific genes detected in the T.pyogenes NCTC5224.
S.No	Singleton:	Protein:
1	NCTC5224_00030	hypothetical protein
2	NCTC5224_10685	hypothetical protein
3	NCTC5224_00245	hypothetical protein
4	NCTC5224_10680	hypothetical protein
5	NCTC5224_08220	hypothetical protein
6	NCTC5224_00305	hypothetical protein
Suppl Table 5 (s) Strain specific genes detected in the T.pyogenes SH03 .
S.No	Singleton:	Protein:
1	SH03_06340	hypothetical protein
2	SH03_09270	hypothetical protein
3	SH03_06655	hypothetical protein
4	SH03_06710	hypothetical protein
5	SH03_06660	hypothetical protein
