# Supplementary material for: Comparative Genome Analysis of 19 Trueperella pyogenes Strains Originating from Different Animal Species Reveal a Genetically Diverse Open Pan-Genome
Source: Antibiotics (Basel). 2022 Dec 24;12(1):24. doi: 10.3390/antibiotics12010024 (PMC9854608; doi:10.3390/antibiotics12010024)
Supplement: Supplementary file 1 [file antibiotics-12-00024-s001.zip › Table S6a-b.xlsx]

## Sheet: a CORE GENOME b STRAIN SP GENES
Suppl Table 6(a) Functional annotation of core genome of investigated T.pyogenes genomes by eggNOG-mapper.
Query	seed_ortholog	evalue	score	eggNOG_OGs	max_annot_lvl	COG_category	Description	Preferred_name	GOs	EC	KEGG_ko	KEGG_Pathway	KEGG_Module	KEGG_Reaction	KEGG_rclass	BRITE	KEGG_TC	CAZy	BiGG_Reaction	PFAMs
TP6375_03035	1121365.AQXB01000001_gene1227	2.15e-174	491.0	COG0214@1|root,COG0214@2|Bacteria,2GK1T@201174|Actinobacteria,22K6Q@1653|Corynebacteriaceae	201174|Actinobacteria	H	Catalyzes the formation of pyridoxal 5'-phosphate from ribose 5-phosphate (RBP), glyceraldehyde 3-phosphate (G3P) and ammonia. The ammonia is provided by the PdxT subunit. Can also use ribulose 5-phosphate and dihydroxyacetone phosphate as substrates, resulting from enzyme-catalyzed isomerization of RBP and G3P, respectively	pdxS	GO:0003674,GO:0003824,GO:0005575,GO:0005623,GO:0005886,GO:0006081,GO:0006725,GO:0006732,GO:0006766,GO:0006767,GO:0006793,GO:0006796,GO:0006807,GO:0008150,GO:0008152,GO:0009058,GO:0009108,GO:0009110,GO:0009987,GO:0016020,GO:0016829,GO:0016840,GO:0016843,GO:0017144,GO:0018130,GO:0019438,GO:0019637,GO:0034641,GO:0040007,GO:0042364,GO:0042816,GO:0042819,GO:0042822,GO:0042823,GO:0044237,GO:0044249,GO:…	4.3.3.6	ko:K06215	ko00750,map00750	-	R07456	RC00010,RC01783,RC03043	ko00000,ko00001,ko01000	-	-	-	SOR_SNZ
2012CQ_ZSH_07190	1121365.AQXB01000001_gene1227	5.68e-174	489.0	COG0214@1|root,COG0214@2|Bacteria,2GK1T@201174|Actinobacteria,22K6Q@1653|Corynebacteriaceae	201174|Actinobacteria	H	Catalyzes the formation of pyridoxal 5'-phosphate from ribose 5-phosphate (RBP), glyceraldehyde 3-phosphate (G3P) and ammonia. The ammonia is provided by the PdxT subunit. Can also use ribulose 5-phosphate and dihydroxyacetone phosphate as substrates, resulting from enzyme-catalyzed isomerization of RBP and G3P, respectively	pdxS	GO:0003674,GO:0003824,GO:0005575,GO:0005623,GO:0005886,GO:0006081,GO:0006725,GO:0006732,GO:0006766,GO:0006767,GO:0006793,GO:0006796,GO:0006807,GO:0008150,GO:0008152,GO:0009058,GO:0009108,GO:0009110,GO:0009987,GO:0016020,GO:0016829,GO:0016840,GO:0016843,GO:0017144,GO:0018130,GO:0019438,GO:0019637,GO:0034641,GO:0040007,GO:0042364,GO:0042816,GO:0042819,GO:0042822,GO:0042823,GO:0044237,GO:0044249,GO:…	4.3.3.6	ko:K06215	ko00750,map00750	-	R07456	RC00010,RC01783,RC03043	ko00000,ko00001,ko01000	-	-	-	SOR_SNZ
Arash114_03030	1121365.AQXB01000001_gene1227	2.5e-173	488.0	COG0214@1|root,COG0214@2|Bacteria,2GK1T@201174|Actinobacteria,22K6Q@1653|Corynebacteriaceae	201174|Actinobacteria	H	Catalyzes the formation of pyridoxal 5'-phosphate from ribose 5-phosphate (RBP), glyceraldehyde 3-phosphate (G3P) and ammonia. The ammonia is provided by the PdxT subunit. Can also use ribulose 5-phosphate and dihydroxyacetone phosphate as substrates, resulting from enzyme-catalyzed isomerization of RBP and G3P, respectively	pdxS	GO:0003674,GO:0003824,GO:0005575,GO:0005623,GO:0005886,GO:0006081,GO:0006725,GO:0006732,GO:0006766,GO:0006767,GO:0006793,GO:0006796,GO:0006807,GO:0008150,GO:0008152,GO:0009058,GO:0009108,GO:0009110,GO:0009987,GO:0016020,GO:0016829,GO:0016840,GO:0016843,GO:0017144,GO:0018130,GO:0019438,GO:0019637,GO:0034641,GO:0040007,GO:0042364,GO:0042816,GO:0042819,GO:0042822,GO:0042823,GO:0044237,GO:0044249,GO:…	4.3.3.6	ko:K06215	ko00750,map00750	-	R07456	RC00010,RC01783,RC03043	ko00000,ko00001,ko01000	-	-	-	SOR_SNZ
Bu5_03005	1122239.AULS01000001_gene1641	5.26e-167	471.0	COG0214@1|root,COG0214@2|Bacteria,2GK1T@201174|Actinobacteria,4FKED@85023|Microbacteriaceae	201174|Actinobacteria	H	Catalyzes the formation of pyridoxal 5'-phosphate from ribose 5-phosphate (RBP), glyceraldehyde 3-phosphate (G3P) and ammonia. The ammonia is provided by the PdxT subunit. Can also use ribulose 5-phosphate and dihydroxyacetone phosphate as substrates, resulting from enzyme-catalyzed isomerization of RBP and G3P, respectively	pdxS	GO:0003674,GO:0003824,GO:0005575,GO:0005623,GO:0005886,GO:0006081,GO:0006725,GO:0006732,GO:0006766,GO:0006767,GO:0006793,GO:0006796,GO:0006807,GO:0008150,GO:0008152,GO:0009058,GO:0009108,GO:0009110,GO:0009987,GO:0016020,GO:0016829,GO:0016840,GO:0016843,GO:0017144,GO:0018130,GO:0019438,GO:0019637,GO:0034641,GO:0040007,GO:0042364,GO:0042816,GO:0042819,GO:0042822,GO:0042823,GO:0044237,GO:0044249,GO:…	4.3.3.6	ko:K06215	ko00750,map00750	-	R07456	RC00010,RC01783,RC03043	ko00000,ko00001,ko01000	-	-	-	SOR_SNZ
DSM_20630_01790	1121365.AQXB01000001_gene1227	2.81e-174	490.0	COG0214@1|root,COG0214@2|Bacteria,2GK1T@201174|Actinobacteria,22K6Q@1653|Corynebacteriaceae	201174|Actinobacteria	H	Catalyzes the formation of pyridoxal 5'-phosphate from ribose 5-phosphate (RBP), glyceraldehyde 3-phosphate (G3P) and ammonia. The ammonia is provided by the PdxT subunit. Can also use ribulose 5-phosphate and dihydroxyacetone phosphate as substrates, resulting from enzyme-catalyzed isomerization of RBP and G3P, respectively	pdxS	GO:0003674,GO:0003824,GO:0005575,GO:0005623,GO:0005886,GO:0006081,GO:0006725,GO:0006732,GO:0006766,GO:0006767,GO:0006793,GO:0006796,GO:0006807,GO:0008150,GO:0008152,GO:0009058,GO:0009108,GO:0009110,GO:0009987,GO:0016020,GO:0016829,GO:0016840,GO:0016843,GO:0017144,GO:0018130,GO:0019438,GO:0019637,GO:0034641,GO:0040007,GO:0042364,GO:0042816,GO:0042819,GO:0042822,GO:0042823,GO:0044237,GO:0044249,GO:…	4.3.3.6	ko:K06215	ko00750,map00750	-	R07456	RC00010,RC01783,RC03043	ko00000,ko00001,ko01000	-	-	-	SOR_SNZ
MS249_02735	1121365.AQXB01000001_gene1227	4e-174	490.0	COG0214@1|root,COG0214@2|Bacteria,2GK1T@201174|Actinobacteria,22K6Q@1653|Corynebacteriaceae	201174|Actinobacteria	H	Catalyzes the formation of pyridoxal 5'-phosphate from ribose 5-phosphate (RBP), glyceraldehyde 3-phosphate (G3P) and ammonia. The ammonia is provided by the PdxT subunit. Can also use ribulose 5-phosphate and dihydroxyacetone phosphate as substrates, resulting from enzyme-catalyzed isomerization of RBP and G3P, respectively	pdxS	GO:0003674,GO:0003824,GO:0005575,GO:0005623,GO:0005886,GO:0006081,GO:0006725,GO:0006732,GO:0006766,GO:0006767,GO:0006793,GO:0006796,GO:0006807,GO:0008150,GO:0008152,GO:0009058,GO:0009108,GO:0009110,GO:0009987,GO:0016020,GO:0016829,GO:0016840,GO:0016843,GO:0017144,GO:0018130,GO:0019438,GO:0019637,GO:0034641,GO:0040007,GO:0042364,GO:0042816,GO:0042819,GO:0042822,GO:0042823,GO:0044237,GO:0044249,GO:…	4.3.3.6	ko:K06215	ko00750,map00750	-	R07456	RC00010,RC01783,RC03043	ko00000,ko00001,ko01000	-	-	-	SOR_SNZ
NCTC5224_04180	1121365.AQXB01000001_gene1227	2.81e-174	490.0	COG0214@1|root,COG0214@2|Bacteria,2GK1T@201174|Actinobacteria,22K6Q@1653|Corynebacteriaceae	201174|Actinobacteria	H	Catalyzes the formation of pyridoxal 5'-phosphate from ribose 5-phosphate (RBP), glyceraldehyde 3-phosphate (G3P) and ammonia. The ammonia is provided by the PdxT subunit. Can also use ribulose 5-phosphate and dihydroxyacetone phosphate as substrates, resulting from enzyme-catalyzed isomerization of RBP and G3P, respectively	pdxS	GO:0003674,GO:0003824,GO:0005575,GO:0005623,GO:0005886,GO:0006081,GO:0006725,GO:0006732,GO:0006766,GO:0006767,GO:0006793,GO:0006796,GO:0006807,GO:0008150,GO:0008152,GO:0009058,GO:0009108,GO:0009110,GO:0009987,GO:0016020,GO:0016829,GO:0016840,GO:0016843,GO:0017144,GO:0018130,GO:0019438,GO:0019637,GO:0034641,GO:0040007,GO:0042364,GO:0042816,GO:0042819,GO:0042822,GO:0042823,GO:0044237,GO:0044249,GO:…	4.3.3.6	ko:K06215	ko00750,map00750	-	R07456	RC00010,RC01783,RC03043	ko00000,ko00001,ko01000	-	-	-	SOR_SNZ
SH01_04305	1121365.AQXB01000001_gene1227	8.06e-174	489.0	COG0214@1|root,COG0214@2|Bacteria,2GK1T@201174|Actinobacteria,22K6Q@1653|Corynebacteriaceae	201174|Actinobacteria	H	Catalyzes the formation of pyridoxal 5'-phosphate from ribose 5-phosphate (RBP), glyceraldehyde 3-phosphate (G3P) and ammonia. The ammonia is provided by the PdxT subunit. Can also use ribulose 5-phosphate and dihydroxyacetone phosphate as substrates, resulting from enzyme-catalyzed isomerization of RBP and G3P, respectively	pdxS	GO:0003674,GO:0003824,GO:0005575,GO:0005623,GO:0005886,GO:0006081,GO:0006725,GO:0006732,GO:0006766,GO:0006767,GO:0006793,GO:0006796,GO:0006807,GO:0008150,GO:0008152,GO:0009058,GO:0009108,GO:0009110,GO:0009987,GO:0016020,GO:0016829,GO:0016840,GO:0016843,GO:0017144,GO:0018130,GO:0019438,GO:0019637,GO:0034641,GO:0040007,GO:0042364,GO:0042816,GO:0042819,GO:0042822,GO:0042823,GO:0044237,GO:0044249,GO:…	4.3.3.6	ko:K06215	ko00750,map00750	-	R07456	RC00010,RC01783,RC03043	ko00000,ko00001,ko01000	-	-	-	SOR_SNZ
SH02_02695	1121365.AQXB01000001_gene1227	8.06e-174	489.0	COG0214@1|root,COG0214@2|Bacteria,2GK1T@201174|Actinobacteria,22K6Q@1653|Corynebacteriaceae	201174|Actinobacteria	H	Catalyzes the formation of pyridoxal 5'-phosphate from ribose 5-phosphate (RBP), glyceraldehyde 3-phosphate (G3P) and ammonia. The ammonia is provided by the PdxT subunit. Can also use ribulose 5-phosphate and dihydroxyacetone phosphate as substrates, resulting from enzyme-catalyzed isomerization of RBP and G3P, respectively	pdxS	GO:0003674,GO:0003824,GO:0005575,GO:0005623,GO:0005886,GO:0006081,GO:0006725,GO:0006732,GO:0006766,GO:0006767,GO:0006793,GO:0006796,GO:0006807,GO:0008150,GO:0008152,GO:0009058,GO:0009108,GO:0009110,GO:0009987,GO:0016020,GO:0016829,GO:0016840,GO:0016843,GO:0017144,GO:0018130,GO:0019438,GO:0019637,GO:0034641,GO:0040007,GO:0042364,GO:0042816,GO:0042819,GO:0042822,GO:0042823,GO:0044237,GO:0044249,GO:…	4.3.3.6	ko:K06215	ko00750,map00750	-	R07456	RC00010,RC01783,RC03043	ko00000,ko00001,ko01000	-	-	-	SOR_SNZ
SH03_02820	1121365.AQXB01000001_gene1227	8.06e-174	489.0	COG0214@1|root,COG0214@2|Bacteria,2GK1T@201174|Actinobacteria,22K6Q@1653|Corynebacteriaceae	201174|Actinobacteria	H	Catalyzes the formation of pyridoxal 5'-phosphate from ribose 5-phosphate (RBP), glyceraldehyde 3-phosphate (G3P) and ammonia. The ammonia is provided by the PdxT subunit. Can also use ribulose 5-phosphate and dihydroxyacetone phosphate as substrates, resulting from enzyme-catalyzed isomerization of RBP and G3P, respectively	pdxS	GO:0003674,GO:0003824,GO:0005575,GO:0005623,GO:0005886,GO:0006081,GO:0006725,GO:0006732,GO:0006766,GO:0006767,GO:0006793,GO:0006796,GO:0006807,GO:0008150,GO:0008152,GO:0009058,GO:0009108,GO:0009110,GO:0009987,GO:0016020,GO:0016829,GO:0016840,GO:0016843,GO:0017144,GO:0018130,GO:0019438,GO:0019637,GO:0034641,GO:0040007,GO:0042364,GO:0042816,GO:0042819,GO:0042822,GO:0042823,GO:0044237,GO:0044249,GO:…	4.3.3.6	ko:K06215	ko00750,map00750	-	R07456	RC00010,RC01783,RC03043	ko00000,ko00001,ko01000	-	-	-	SOR_SNZ
TP1_04375	1121365.AQXB01000001_gene1227	6.61e-173	487.0	COG0214@1|root,COG0214@2|Bacteria,2GK1T@201174|Actinobacteria,22K6Q@1653|Corynebacteriaceae	201174|Actinobacteria	H	Catalyzes the formation of pyridoxal 5'-phosphate from ribose 5-phosphate (RBP), glyceraldehyde 3-phosphate (G3P) and ammonia. The ammonia is provided by the PdxT subunit. Can also use ribulose 5-phosphate and dihydroxyacetone phosphate as substrates, resulting from enzyme-catalyzed isomerization of RBP and G3P, respectively	pdxS	GO:0003674,GO:0003824,GO:0005575,GO:0005623,GO:0005886,GO:0006081,GO:0006725,GO:0006732,GO:0006766,GO:0006767,GO:0006793,GO:0006796,GO:0006807,GO:0008150,GO:0008152,GO:0009058,GO:0009108,GO:0009110,GO:0009987,GO:0016020,GO:0016829,GO:0016840,GO:0016843,GO:0017144,GO:0018130,GO:0019438,GO:0019637,GO:0034641,GO:0040007,GO:0042364,GO:0042816,GO:0042819,GO:0042822,GO:0042823,GO:0044237,GO:0044249,GO:…	4.3.3.6	ko:K06215	ko00750,map00750	-	R07456	RC00010,RC01783,RC03043	ko00000,ko00001,ko01000	-	-	-	SOR_SNZ
TP2_00085	1122239.AULS01000001_gene1641	1.67e-163	462.0	COG0214@1|root,COG0214@2|Bacteria,2GK1T@201174|Actinobacteria,4FKED@85023|Microbacteriaceae	201174|Actinobacteria	H	Catalyzes the formation of pyridoxal 5'-phosphate from ribose 5-phosphate (RBP), glyceraldehyde 3-phosphate (G3P) and ammonia. The ammonia is provided by the PdxT subunit. Can also use ribulose 5-phosphate and dihydroxyacetone phosphate as substrates, resulting from enzyme-catalyzed isomerization of RBP and G3P, respectively	pdxS	GO:0003674,GO:0003824,GO:0005575,GO:0005623,GO:0005886,GO:0006081,GO:0006725,GO:0006732,GO:0006766,GO:0006767,GO:0006793,GO:0006796,GO:0006807,GO:0008150,GO:0008152,GO:0009058,GO:0009108,GO:0009110,GO:0009987,GO:0016020,GO:0016829,GO:0016840,GO:0016843,GO:0017144,GO:0018130,GO:0019438,GO:0019637,GO:0034641,GO:0040007,GO:0042364,GO:0042816,GO:0042819,GO:0042822,GO:0042823,GO:0044237,GO:0044249,GO:…	4.3.3.6	ko:K06215	ko00750,map00750	-	R07456	RC00010,RC01783,RC03043	ko00000,ko00001,ko01000	-	-	-	SOR_SNZ
TP3_02325	1121365.AQXB01000001_gene1227	8.06e-174	489.0	COG0214@1|root,COG0214@2|Bacteria,2GK1T@201174|Actinobacteria,22K6Q@1653|Corynebacteriaceae	201174|Actinobacteria	H	Catalyzes the formation of pyridoxal 5'-phosphate from ribose 5-phosphate (RBP), glyceraldehyde 3-phosphate (G3P) and ammonia. The ammonia is provided by the PdxT subunit. Can also use ribulose 5-phosphate and dihydroxyacetone phosphate as substrates, resulting from enzyme-catalyzed isomerization of RBP and G3P, respectively	pdxS	GO:0003674,GO:0003824,GO:0005575,GO:0005623,GO:0005886,GO:0006081,GO:0006725,GO:0006732,GO:0006766,GO:0006767,GO:0006793,GO:0006796,GO:0006807,GO:0008150,GO:0008152,GO:0009058,GO:0009108,GO:0009110,GO:0009987,GO:0016020,GO:0016829,GO:0016840,GO:0016843,GO:0017144,GO:0018130,GO:0019438,GO:0019637,GO:0034641,GO:0040007,GO:0042364,GO:0042816,GO:0042819,GO:0042822,GO:0042823,GO:0044237,GO:0044249,GO:…	4.3.3.6	ko:K06215	ko00750,map00750	-	R07456	RC00010,RC01783,RC03043	ko00000,ko00001,ko01000	-	-	-	SOR_SNZ
TP4_02320	1121365.AQXB01000001_gene1227	8.06e-174	489.0	COG0214@1|root,COG0214@2|Bacteria,2GK1T@201174|Actinobacteria,22K6Q@1653|Corynebacteriaceae	201174|Actinobacteria	H	Catalyzes the formation of pyridoxal 5'-phosphate from ribose 5-phosphate (RBP), glyceraldehyde 3-phosphate (G3P) and ammonia. The ammonia is provided by the PdxT subunit. Can also use ribulose 5-phosphate and dihydroxyacetone phosphate as substrates, resulting from enzyme-catalyzed isomerization of RBP and G3P, respectively	pdxS	GO:0003674,GO:0003824,GO:0005575,GO:0005623,GO:0005886,GO:0006081,GO:0006725,GO:0006732,GO:0006766,GO:0006767,GO:0006793,GO:0006796,GO:0006807,GO:0008150,GO:0008152,GO:0009058,GO:0009108,GO:0009110,GO:0009987,GO:0016020,GO:0016829,GO:0016840,GO:0016843,GO:0017144,GO:0018130,GO:0019438,GO:0019637,GO:0034641,GO:0040007,GO:0042364,GO:0042816,GO:0042819,GO:0042822,GO:0042823,GO:0044237,GO:0044249,GO:…	4.3.3.6	ko:K06215	ko00750,map00750	-	R07456	RC00010,RC01783,RC03043	ko00000,ko00001,ko01000	-	-	-	SOR_SNZ
TP4479_08670	1121365.AQXB01000001_gene1227	8.06e-174	489.0	COG0214@1|root,COG0214@2|Bacteria,2GK1T@201174|Actinobacteria,22K6Q@1653|Corynebacteriaceae	201174|Actinobacteria	H	Catalyzes the formation of pyridoxal 5'-phosphate from ribose 5-phosphate (RBP), glyceraldehyde 3-phosphate (G3P) and ammonia. The ammonia is provided by the PdxT subunit. Can also use ribulose 5-phosphate and dihydroxyacetone phosphate as substrates, resulting from enzyme-catalyzed isomerization of RBP and G3P, respectively	pdxS	GO:0003674,GO:0003824,GO:0005575,GO:0005623,GO:0005886,GO:0006081,GO:0006725,GO:0006732,GO:0006766,GO:0006767,GO:0006793,GO:0006796,GO:0006807,GO:0008150,GO:0008152,GO:0009058,GO:0009108,GO:0009110,GO:0009987,GO:0016020,GO:0016829,GO:0016840,GO:0016843,GO:0017144,GO:0018130,GO:0019438,GO:0019637,GO:0034641,GO:0040007,GO:0042364,GO:0042816,GO:0042819,GO:0042822,GO:0042823,GO:0044237,GO:0044249,GO:…	4.3.3.6	ko:K06215	ko00750,map00750	-	R07456	RC00010,RC01783,RC03043	ko00000,ko00001,ko01000	-	-	-	SOR_SNZ
TP8_04675	1121365.AQXB01000001_gene1227	2.81e-174	490.0	COG0214@1|root,COG0214@2|Bacteria,2GK1T@201174|Actinobacteria,22K6Q@1653|Corynebacteriaceae	201174|Actinobacteria	H	Catalyzes the formation of pyridoxal 5'-phosphate from ribose 5-phosphate (RBP), glyceraldehyde 3-phosphate (G3P) and ammonia. The ammonia is provided by the PdxT subunit. Can also use ribulose 5-phosphate and dihydroxyacetone phosphate as substrates, resulting from enzyme-catalyzed isomerization of RBP and G3P, respectively	pdxS	GO:0003674,GO:0003824,GO:0005575,GO:0005623,GO:0005886,GO:0006081,GO:0006725,GO:0006732,GO:0006766,GO:0006767,GO:0006793,GO:0006796,GO:0006807,GO:0008150,GO:0008152,GO:0009058,GO:0009108,GO:0009110,GO:0009987,GO:0016020,GO:0016829,GO:0016840,GO:0016843,GO:0017144,GO:0018130,GO:0019438,GO:0019637,GO:0034641,GO:0040007,GO:0042364,GO:0042816,GO:0042819,GO:0042822,GO:0042823,GO:0044237,GO:0044249,GO:…	4.3.3.6	ko:K06215	ko00750,map00750	-	R07456	RC00010,RC01783,RC03043	ko00000,ko00001,ko01000	-	-	-	SOR_SNZ
TP_2849_10605	1121365.AQXB01000001_gene1227	8.06e-174	489.0	COG0214@1|root,COG0214@2|Bacteria,2GK1T@201174|Actinobacteria,22K6Q@1653|Corynebacteriaceae	201174|Actinobacteria	H	Catalyzes the formation of pyridoxal 5'-phosphate from ribose 5-phosphate (RBP), glyceraldehyde 3-phosphate (G3P) and ammonia. The ammonia is provided by the PdxT subunit. Can also use ribulose 5-phosphate and dihydroxyacetone phosphate as substrates, resulting from enzyme-catalyzed isomerization of RBP and G3P, respectively	pdxS	GO:0003674,GO:0003824,GO:0005575,GO:0005623,GO:0005886,GO:0006081,GO:0006725,GO:0006732,GO:0006766,GO:0006767,GO:0006793,GO:0006796,GO:0006807,GO:0008150,GO:0008152,GO:0009058,GO:0009108,GO:0009110,GO:0009987,GO:0016020,GO:0016829,GO:0016840,GO:0016843,GO:0017144,GO:0018130,GO:0019438,GO:0019637,GO:0034641,GO:0040007,GO:0042364,GO:0042816,GO:0042819,GO:0042822,GO:0042823,GO:0044237,GO:0044249,GO:…	4.3.3.6	ko:K06215	ko00750,map00750	-	R07456	RC00010,RC01783,RC03043	ko00000,ko00001,ko01000	-	-	-	SOR_SNZ
UFV1_08665	1121365.AQXB01000001_gene1227	2.15e-174	491.0	COG0214@1|root,COG0214@2|Bacteria,2GK1T@201174|Actinobacteria,22K6Q@1653|Corynebacteriaceae	201174|Actinobacteria	H	Catalyzes the formation of pyridoxal 5'-phosphate from ribose 5-phosphate (RBP), glyceraldehyde 3-phosphate (G3P) and ammonia. The ammonia is provided by the PdxT subunit. Can also use ribulose 5-phosphate and dihydroxyacetone phosphate as substrates, resulting from enzyme-catalyzed isomerization of RBP and G3P, respectively	pdxS	GO:0003674,GO:0003824,GO:0005575,GO:0005623,GO:0005886,GO:0006081,GO:0006725,GO:0006732,GO:0006766,GO:0006767,GO:0006793,GO:0006796,GO:0006807,GO:0008150,GO:0008152,GO:0009058,GO:0009108,GO:0009110,GO:0009987,GO:0016020,GO:0016829,GO:0016840,GO:0016843,GO:0017144,GO:0018130,GO:0019438,GO:0019637,GO:0034641,GO:0040007,GO:0042364,GO:0042816,GO:0042819,GO:0042822,GO:0042823,GO:0044237,GO:0044249,GO:…	4.3.3.6	ko:K06215	ko00750,map00750	-	R07456	RC00010,RC01783,RC03043	ko00000,ko00001,ko01000	-	-	-	SOR_SNZ
jx18_04100	1121365.AQXB01000001_gene1227	8.06e-174	489.0	COG0214@1|root,COG0214@2|Bacteria,2GK1T@201174|Actinobacteria,22K6Q@1653|Corynebacteriaceae	201174|Actinobacteria	H	Catalyzes the formation of pyridoxal 5'-phosphate from ribose 5-phosphate (RBP), glyceraldehyde 3-phosphate (G3P) and ammonia. The ammonia is provided by the PdxT subunit. Can also use ribulose 5-phosphate and dihydroxyacetone phosphate as substrates, resulting from enzyme-catalyzed isomerization of RBP and G3P, respectively	pdxS	GO:0003674,GO:0003824,GO:0005575,GO:0005623,GO:0005886,GO:0006081,GO:0006725,GO:0006732,GO:0006766,GO:0006767,GO:0006793,GO:0006796,GO:0006807,GO:0008150,GO:0008152,GO:0009058,GO:0009108,GO:0009110,GO:0009987,GO:0016020,GO:0016829,GO:0016840,GO:0016843,GO:0017144,GO:0018130,GO:0019438,GO:0019637,GO:0034641,GO:0040007,GO:0042364,GO:0042816,GO:0042819,GO:0042822,GO:0042823,GO:0044237,GO:0044249,GO:…	4.3.3.6	ko:K06215	ko00750,map00750	-	R07456	RC00010,RC01783,RC03043	ko00000,ko00001,ko01000	-	-	-	SOR_SNZ
TP6375_03065	1095772.CAHH01000015_gene1071	1.45e-111	333.0	COG3764@1|root,COG3764@2|Bacteria,2GNWT@201174|Actinobacteria	201174|Actinobacteria	M	Sortase (surface protein transpeptidase)	-	-	3.4.22.70	ko:K07284	-	-	-	-	ko00000,ko01000,ko01002,ko01011	-	-	-	Sortase
2012CQ_ZSH_07165	1095772.CAHH01000015_gene1071	9.43e-107	320.0	COG3764@1|root,COG3764@2|Bacteria,2GNWT@201174|Actinobacteria	201174|Actinobacteria	M	Sortase (surface protein transpeptidase)	-	-	3.4.22.70	ko:K07284	-	-	-	-	ko00000,ko01000,ko01002,ko01011	-	-	-	Sortase
Arash114_03060	1095772.CAHH01000015_gene1071	1.55e-113	338.0	COG3764@1|root,COG3764@2|Bacteria,2GNWT@201174|Actinobacteria	201174|Actinobacteria	M	Sortase (surface protein transpeptidase)	-	-	3.4.22.70	ko:K07284	-	-	-	-	ko00000,ko01000,ko01002,ko01011	-	-	-	Sortase
Bu5_02980	1095772.CAHH01000015_gene1071	1.54e-105	317.0	COG3764@1|root,COG3764@2|Bacteria,2GNWT@201174|Actinobacteria	201174|Actinobacteria	M	Sortase (surface protein transpeptidase)	-	-	3.4.22.70	ko:K07284	-	-	-	-	ko00000,ko01000,ko01002,ko01011	-	-	-	Sortase
DSM_20630_01760	1095772.CAHH01000015_gene1071	3.93e-107	320.0	COG3764@1|root,COG3764@2|Bacteria,2GNWT@201174|Actinobacteria	201174|Actinobacteria	M	Sortase (surface protein transpeptidase)	-	-	3.4.22.70	ko:K07284	-	-	-	-	ko00000,ko01000,ko01002,ko01011	-	-	-	Sortase
MS249_08880	1095772.CAHH01000015_gene1071	1.45e-111	333.0	COG3764@1|root,COG3764@2|Bacteria,2GNWT@201174|Actinobacteria	201174|Actinobacteria	M	Sortase (surface protein transpeptidase)	-	-	3.4.22.70	ko:K07284	-	-	-	-	ko00000,ko01000,ko01002,ko01011	-	-	-	Sortase
NCTC5224_04155	1095772.CAHH01000015_gene1071	3.93e-107	320.0	COG3764@1|root,COG3764@2|Bacteria,2GNWT@201174|Actinobacteria	201174|Actinobacteria	M	Sortase (surface protein transpeptidase)	-	-	3.4.22.70	ko:K07284	-	-	-	-	ko00000,ko01000,ko01002,ko01011	-	-	-	Sortase
SH01_04280	1095772.CAHH01000015_gene1071	1.9e-106	319.0	COG3764@1|root,COG3764@2|Bacteria,2GNWT@201174|Actinobacteria	201174|Actinobacteria	M	Sortase (surface protein transpeptidase)	-	-	3.4.22.70	ko:K07284	-	-	-	-	ko00000,ko01000,ko01002,ko01011	-	-	-	Sortase
SH02_02670	1095772.CAHH01000015_gene1071	9.43e-107	320.0	COG3764@1|root,COG3764@2|Bacteria,2GNWT@201174|Actinobacteria	201174|Actinobacteria	M	Sortase (surface protein transpeptidase)	-	-	3.4.22.70	ko:K07284	-	-	-	-	ko00000,ko01000,ko01002,ko01011	-	-	-	Sortase
SH03_02845	1095772.CAHH01000015_gene1071	9.43e-107	320.0	COG3764@1|root,COG3764@2|Bacteria,2GNWT@201174|Actinobacteria	201174|Actinobacteria	M	Sortase (surface protein transpeptidase)	-	-	3.4.22.70	ko:K07284	-	-	-	-	ko00000,ko01000,ko01002,ko01011	-	-	-	Sortase
TP1_04400	1095772.CAHH01000015_gene1071	4.12e-111	332.0	COG3764@1|root,COG3764@2|Bacteria,2GNWT@201174|Actinobacteria	201174|Actinobacteria	M	Sortase (surface protein transpeptidase)	-	-	3.4.22.70	ko:K07284	-	-	-	-	ko00000,ko01000,ko01002,ko01011	-	-	-	Sortase
TP2_00110	1095772.CAHH01000015_gene1071	1.45e-111	333.0	COG3764@1|root,COG3764@2|Bacteria,2GNWT@201174|Actinobacteria	201174|Actinobacteria	M	Sortase (surface protein transpeptidase)	-	-	3.4.22.70	ko:K07284	-	-	-	-	ko00000,ko01000,ko01002,ko01011	-	-	-	Sortase
TP3_02300	1095772.CAHH01000015_gene1071	1.9e-106	319.0	COG3764@1|root,COG3764@2|Bacteria,2GNWT@201174|Actinobacteria	201174|Actinobacteria	M	Sortase (surface protein transpeptidase)	-	-	3.4.22.70	ko:K07284	-	-	-	-	ko00000,ko01000,ko01002,ko01011	-	-	-	Sortase
TP4_02345	1095772.CAHH01000015_gene1071	1.9e-106	319.0	COG3764@1|root,COG3764@2|Bacteria,2GNWT@201174|Actinobacteria	201174|Actinobacteria	M	Sortase (surface protein transpeptidase)	-	-	3.4.22.70	ko:K07284	-	-	-	-	ko00000,ko01000,ko01002,ko01011	-	-	-	Sortase
TP4479_08645	1095772.CAHH01000015_gene1071	1.9e-106	319.0	COG3764@1|root,COG3764@2|Bacteria,2GNWT@201174|Actinobacteria	201174|Actinobacteria	M	Sortase (surface protein transpeptidase)	-	-	3.4.22.70	ko:K07284	-	-	-	-	ko00000,ko01000,ko01002,ko01011	-	-	-	Sortase
TP8_04650	1095772.CAHH01000015_gene1071	9.43e-107	320.0	COG3764@1|root,COG3764@2|Bacteria,2GNWT@201174|Actinobacteria	201174|Actinobacteria	M	Sortase (surface protein transpeptidase)	-	-	3.4.22.70	ko:K07284	-	-	-	-	ko00000,ko01000,ko01002,ko01011	-	-	-	Sortase
TP_2849_10580	1095772.CAHH01000015_gene1071	1.9e-106	319.0	COG3764@1|root,COG3764@2|Bacteria,2GNWT@201174|Actinobacteria	201174|Actinobacteria	M	Sortase (surface protein transpeptidase)	-	-	3.4.22.70	ko:K07284	-	-	-	-	ko00000,ko01000,ko01002,ko01011	-	-	-	Sortase
UFV1_08695	1095772.CAHH01000015_gene1071	1.45e-111	333.0	COG3764@1|root,COG3764@2|Bacteria,2GNWT@201174|Actinobacteria	201174|Actinobacteria	M	Sortase (surface protein transpeptidase)	-	-	3.4.22.70	ko:K07284	-	-	-	-	ko00000,ko01000,ko01002,ko01011	-	-	-	Sortase
jx18_04125	1095772.CAHH01000015_gene1071	7.19e-112	334.0	COG3764@1|root,COG3764@2|Bacteria,2GNWT@201174|Actinobacteria	201174|Actinobacteria	M	Sortase (surface protein transpeptidase)	-	-	3.4.22.70	ko:K07284	-	-	-	-	ko00000,ko01000,ko01002,ko01011	-	-	-	Sortase
TP6375_06075	1487956.DR71_353	3.61e-112	337.0	COG1925@1|root,COG3711@1|root,COG1925@2|Bacteria,COG3711@2|Bacteria,2I8K8@201174|Actinobacteria,22M2P@1653|Corynebacteriaceae	201174|Actinobacteria	K	Transcriptional antiterminator	licT	-	-	ko:K03488	-	-	-	-	ko00000,ko03000	-	-	-	CAT_RBD,PRD
2012CQ_ZSH_04495	1487956.DR71_353	7.24e-112	336.0	COG1925@1|root,COG3711@1|root,COG1925@2|Bacteria,COG3711@2|Bacteria,2I8K8@201174|Actinobacteria,22M2P@1653|Corynebacteriaceae	201174|Actinobacteria	K	Transcriptional antiterminator	licT	-	-	ko:K03488	-	-	-	-	ko00000,ko03000	-	-	-	CAT_RBD,PRD
Arash114_06095	1487956.DR71_353	5.11e-112	337.0	COG1925@1|root,COG3711@1|root,COG1925@2|Bacteria,COG3711@2|Bacteria,2I8K8@201174|Actinobacteria,22M2P@1653|Corynebacteriaceae	201174|Actinobacteria	K	Transcriptional antiterminator	licT	-	-	ko:K03488	-	-	-	-	ko00000,ko03000	-	-	-	CAT_RBD,PRD
Bu5_00315	1487956.DR71_353	5.11e-112	337.0	COG1925@1|root,COG3711@1|root,COG1925@2|Bacteria,COG3711@2|Bacteria,2I8K8@201174|Actinobacteria,22M2P@1653|Corynebacteriaceae	201174|Actinobacteria	K	Transcriptional antiterminator	licT	-	-	ko:K03488	-	-	-	-	ko00000,ko03000	-	-	-	CAT_RBD,PRD
DSM_20630_08800	1487956.DR71_353	7.24e-112	336.0	COG1925@1|root,COG3711@1|root,COG1925@2|Bacteria,COG3711@2|Bacteria,2I8K8@201174|Actinobacteria,22M2P@1653|Corynebacteriaceae	201174|Actinobacteria	K	Transcriptional antiterminator	licT	-	-	ko:K03488	-	-	-	-	ko00000,ko03000	-	-	-	CAT_RBD,PRD
MS249_03670	1487956.DR71_353	5.11e-112	337.0	COG1925@1|root,COG3711@1|root,COG1925@2|Bacteria,COG3711@2|Bacteria,2I8K8@201174|Actinobacteria,22M2P@1653|Corynebacteriaceae	201174|Actinobacteria	K	Transcriptional antiterminator	licT	-	-	ko:K03488	-	-	-	-	ko00000,ko03000	-	-	-	CAT_RBD,PRD
NCTC5224_01455	1487956.DR71_353	7.24e-112	336.0	COG1925@1|root,COG3711@1|root,COG1925@2|Bacteria,COG3711@2|Bacteria,2I8K8@201174|Actinobacteria,22M2P@1653|Corynebacteriaceae	201174|Actinobacteria	K	Transcriptional antiterminator	licT	-	-	ko:K03488	-	-	-	-	ko00000,ko03000	-	-	-	CAT_RBD,PRD
SH01_00335	1487956.DR71_353	7.24e-112	336.0	COG1925@1|root,COG3711@1|root,COG1925@2|Bacteria,COG3711@2|Bacteria,2I8K8@201174|Actinobacteria,22M2P@1653|Corynebacteriaceae	201174|Actinobacteria	K	Transcriptional antiterminator	licT	-	-	ko:K03488	-	-	-	-	ko00000,ko03000	-	-	-	CAT_RBD,PRD
SH02_01480	1487956.DR71_353	7.24e-112	336.0	COG1925@1|root,COG3711@1|root,COG1925@2|Bacteria,COG3711@2|Bacteria,2I8K8@201174|Actinobacteria,22M2P@1653|Corynebacteriaceae	201174|Actinobacteria	K	Transcriptional antiterminator	licT	-	-	ko:K03488	-	-	-	-	ko00000,ko03000	-	-	-	CAT_RBD,PRD
SH03_08445	1487956.DR71_353	7.24e-112	336.0	COG1925@1|root,COG3711@1|root,COG1925@2|Bacteria,COG3711@2|Bacteria,2I8K8@201174|Actinobacteria,22M2P@1653|Corynebacteriaceae	201174|Actinobacteria	K	Transcriptional antiterminator	licT	-	-	ko:K03488	-	-	-	-	ko00000,ko03000	-	-	-	CAT_RBD,PRD
TP1_07115	1487956.DR71_353	5.11e-112	337.0	COG1925@1|root,COG3711@1|root,COG1925@2|Bacteria,COG3711@2|Bacteria,2I8K8@201174|Actinobacteria,22M2P@1653|Corynebacteriaceae	201174|Actinobacteria	K	Transcriptional antiterminator	licT	-	-	ko:K03488	-	-	-	-	ko00000,ko03000	-	-	-	CAT_RBD,PRD
TP2_02685	1487956.DR71_353	3.61e-112	337.0	COG1925@1|root,COG3711@1|root,COG1925@2|Bacteria,COG3711@2|Bacteria,2I8K8@201174|Actinobacteria,22M2P@1653|Corynebacteriaceae	201174|Actinobacteria	K	Transcriptional antiterminator	licT	-	-	ko:K03488	-	-	-	-	ko00000,ko03000	-	-	-	CAT_RBD,PRD
TP3_10265	1487956.DR71_353	7.24e-112	336.0	COG1925@1|root,COG3711@1|root,COG1925@2|Bacteria,COG3711@2|Bacteria,2I8K8@201174|Actinobacteria,22M2P@1653|Corynebacteriaceae	201174|Actinobacteria	K	Transcriptional antiterminator	licT	-	-	ko:K03488	-	-	-	-	ko00000,ko03000	-	-	-	CAT_RBD,PRD
TP4_05570	1487956.DR71_353	9.49e-110	331.0	COG1925@1|root,COG3711@1|root,COG1925@2|Bacteria,COG3711@2|Bacteria,2I8K8@201174|Actinobacteria,22M2P@1653|Corynebacteriaceae	201174|Actinobacteria	K	Transcriptional antiterminator	licT	-	-	ko:K03488	-	-	-	-	ko00000,ko03000	-	-	-	CAT_RBD,PRD
TP4479_05745	1487956.DR71_353	7.24e-112	336.0	COG1925@1|root,COG3711@1|root,COG1925@2|Bacteria,COG3711@2|Bacteria,2I8K8@201174|Actinobacteria,22M2P@1653|Corynebacteriaceae	201174|Actinobacteria	K	Transcriptional antiterminator	licT	-	-	ko:K03488	-	-	-	-	ko00000,ko03000	-	-	-	CAT_RBD,PRD
TP8_01660	1487956.DR71_353	1.03e-111	336.0	COG1925@1|root,COG3711@1|root,COG1925@2|Bacteria,COG3711@2|Bacteria,2I8K8@201174|Actinobacteria,22M2P@1653|Corynebacteriaceae	201174|Actinobacteria	K	Transcriptional antiterminator	licT	-	-	ko:K03488	-	-	-	-	ko00000,ko03000	-	-	-	CAT_RBD,PRD
TP_2849_07680	1487956.DR71_353	7.24e-112	336.0	COG1925@1|root,COG3711@1|root,COG1925@2|Bacteria,COG3711@2|Bacteria,2I8K8@201174|Actinobacteria,22M2P@1653|Corynebacteriaceae	201174|Actinobacteria	K	Transcriptional antiterminator	licT	-	-	ko:K03488	-	-	-	-	ko00000,ko03000	-	-	-	CAT_RBD,PRD
UFV1_09500	1487956.DR71_353	3.61e-112	337.0	COG1925@1|root,COG3711@1|root,COG1925@2|Bacteria,COG3711@2|Bacteria,2I8K8@201174|Actinobacteria,22M2P@1653|Corynebacteriaceae	201174|Actinobacteria	K	Transcriptional antiterminator	licT	-	-	ko:K03488	-	-	-	-	ko00000,ko03000	-	-	-	CAT_RBD,PRD
jx18_07240	1487956.DR71_353	7.24e-112	336.0	COG1925@1|root,COG3711@1|root,COG1925@2|Bacteria,COG3711@2|Bacteria,2I8K8@201174|Actinobacteria,22M2P@1653|Corynebacteriaceae	201174|Actinobacteria	K	Transcriptional antiterminator	licT	-	-	ko:K03488	-	-	-	-	ko00000,ko03000	-	-	-	CAT_RBD,PRD
TP6375_00360	1403948.Q618_VCMC00001G0192	6.81e-150	445.0	2AJYG@1|root,31AMM@2|Bacteria,2HMTK@201174|Actinobacteria,4D7IC@85005|Actinomycetales	201174|Actinobacteria	-	-	-	-	-	-	-	-	-	-	-	-	-	-	-
2012CQ_ZSH_08035	1403948.Q618_VCMC00001G0192	3.77e-265	748.0	2AJYG@1|root,31AMM@2|Bacteria,2HMTK@201174|Actinobacteria,4D7IC@85005|Actinomycetales	201174|Actinobacteria	-	-	-	-	-	-	-	-	-	-	-	-	-	-	-
Arash114_00355	1403948.Q618_VCMC00001G0192	4.72e-306	856.0	2AJYG@1|root,31AMM@2|Bacteria,2HMTK@201174|Actinobacteria,4D7IC@85005|Actinomycetales	201174|Actinobacteria	-	-	-	-	-	-	-	-	-	-	-	-	-	-	-
Bu5_05460	1403948.Q618_VCMC00001G0192	8.22e-307	858.0	2AJYG@1|root,31AMM@2|Bacteria,2HMTK@201174|Actinobacteria,4D7IC@85005|Actinomycetales	201174|Actinobacteria	-	-	-	-	-	-	-	-	-	-	-	-	-	-	-
DSM_20630_02635	1403948.Q618_VCMC00001G0192	3.53e-308	861.0	2AJYG@1|root,31AMM@2|Bacteria,2HMTK@201174|Actinobacteria,4D7IC@85005|Actinomycetales	201174|Actinobacteria	-	-	-	-	-	-	-	-	-	-	-	-	-	-	-
MS249_05865	1403948.Q618_VCMC00001G0192	1.75e-308	862.0	2AJYG@1|root,31AMM@2|Bacteria,2HMTK@201174|Actinobacteria,4D7IC@85005|Actinomycetales	201174|Actinobacteria	-	-	-	-	-	-	-	-	-	-	-	-	-	-	-
NCTC5224_05030	1403948.Q618_VCMC00001G0192	3.53e-308	861.0	2AJYG@1|root,31AMM@2|Bacteria,2HMTK@201174|Actinobacteria,4D7IC@85005|Actinomycetales	201174|Actinobacteria	-	-	-	-	-	-	-	-	-	-	-	-	-	-	-
SH01_09285	1403948.Q618_VCMC00001G0192	1.91e-305	854.0	2AJYG@1|root,31AMM@2|Bacteria,2HMTK@201174|Actinobacteria,4D7IC@85005|Actinomycetales	201174|Actinobacteria	-	-	-	-	-	-	-	-	-	-	-	-	-	-	-
SH02_05810	1403948.Q618_VCMC00001G0192	1.91e-305	854.0	2AJYG@1|root,31AMM@2|Bacteria,2HMTK@201174|Actinobacteria,4D7IC@85005|Actinomycetales	201174|Actinobacteria	-	-	-	-	-	-	-	-	-	-	-	-	-	-	-
SH03_00340	1403948.Q618_VCMC00001G0192	1.91e-305	854.0	2AJYG@1|root,31AMM@2|Bacteria,2HMTK@201174|Actinobacteria,4D7IC@85005|Actinomycetales	201174|Actinobacteria	-	-	-	-	-	-	-	-	-	-	-	-	-	-	-
TP1_03520	1403948.Q618_VCMC00001G0192	1.35e-305	855.0	2AJYG@1|root,31AMM@2|Bacteria,2HMTK@201174|Actinobacteria,4D7IC@85005|Actinomycetales	201174|Actinobacteria	-	-	-	-	-	-	-	-	-	-	-	-	-	-	-
TP2_09515	1403948.Q618_VCMC00001G0192	7.11e-308	860.0	2AJYG@1|root,31AMM@2|Bacteria,2HMTK@201174|Actinobacteria,4D7IC@85005|Actinomycetales	201174|Actinobacteria	-	-	-	-	-	-	-	-	-	-	-	-	-	-	-
TP3_03165	1403948.Q618_VCMC00001G0192	1.75e-308	862.0	2AJYG@1|root,31AMM@2|Bacteria,2HMTK@201174|Actinobacteria,4D7IC@85005|Actinomycetales	201174|Actinobacteria	-	-	-	-	-	-	-	-	-	-	-	-	-	-	-
TP4_01485	1403948.Q618_VCMC00001G0192	1.75e-308	862.0	2AJYG@1|root,31AMM@2|Bacteria,2HMTK@201174|Actinobacteria,4D7IC@85005|Actinomycetales	201174|Actinobacteria	-	-	-	-	-	-	-	-	-	-	-	-	-	-	-
TP4479_09510	1403948.Q618_VCMC00001G0192	1.75e-308	862.0	2AJYG@1|root,31AMM@2|Bacteria,2HMTK@201174|Actinobacteria,4D7IC@85005|Actinomycetales	201174|Actinobacteria	-	-	-	-	-	-	-	-	-	-	-	-	-	-	-
TP8_05630	1403948.Q618_VCMC00001G0192	1.91e-305	854.0	2AJYG@1|root,31AMM@2|Bacteria,2HMTK@201174|Actinobacteria,4D7IC@85005|Actinomycetales	201174|Actinobacteria	-	-	-	-	-	-	-	-	-	-	-	-	-	-	-
TP_2849_00565	1403948.Q618_VCMC00001G0192	1.75e-308	862.0	2AJYG@1|root,31AMM@2|Bacteria,2HMTK@201174|Actinobacteria,4D7IC@85005|Actinomycetales	201174|Actinobacteria	-	-	-	-	-	-	-	-	-	-	-	-	-	-	-
UFV1_02650	1403948.Q618_VCMC00001G0192	6.81e-150	445.0	2AJYG@1|root,31AMM@2|Bacteria,2HMTK@201174|Actinobacteria,4D7IC@85005|Actinomycetales	201174|Actinobacteria	-	-	-	-	-	-	-	-	-	-	-	-	-	-	-
jx18_03265	1403948.Q618_VCMC00001G0192	1.75e-308	862.0	2AJYG@1|root,31AMM@2|Bacteria,2HMTK@201174|Actinobacteria,4D7IC@85005|Actinomycetales	201174|Actinobacteria	-	-	-	-	-	-	-	-	-	-	-	-	-	-	-
TP6375_02500	1227261.HMPREF0043_00169	8.77e-292	812.0	COG0028@1|root,COG0028@2|Bacteria,2GKU4@201174|Actinobacteria,4D30B@85005|Actinomycetales	201174|Actinobacteria	H	acetolactate synthase	ilvB	-	2.2.1.6	ko:K01652	ko00290,ko00650,ko00660,ko00770,ko01100,ko01110,ko01130,ko01210,ko01230,map00290,map00650,map00660,map00770,map01100,map01110,map01130,map01210,map01230	M00019,M00570	R00006,R00014,R00226,R03050,R04672,R04673,R08648	RC00027,RC00106,RC01192,RC02744,RC02893	ko00000,ko00001,ko00002,ko01000	-	-	-	TPP_enzyme_C,TPP_enzyme_M,TPP_enzyme_N
2012CQ_ZSH_10470	883067.HMPREF9237_00703	3e-291	811.0	COG0028@1|root,COG0028@2|Bacteria,2GKU4@201174|Actinobacteria,4D30B@85005|Actinomycetales	201174|Actinobacteria	H	acetolactate synthase	ilvB	-	2.2.1.6	ko:K01652	ko00290,ko00650,ko00660,ko00770,ko01100,ko01110,ko01130,ko01210,ko01230,map00290,map00650,map00660,map00770,map01100,map01110,map01130,map01210,map01230	M00019,M00570	R00006,R00014,R00226,R03050,R04672,R04673,R08648	RC00027,RC00106,RC01192,RC02744,RC02893	ko00000,ko00001,ko00002,ko01000	-	-	-	TPP_enzyme_C,TPP_enzyme_M,TPP_enzyme_N
Arash114_02500	1227261.HMPREF0043_00169	3.56e-291	810.0	COG0028@1|root,COG0028@2|Bacteria,2GKU4@201174|Actinobacteria,4D30B@85005|Actinomycetales	201174|Actinobacteria	H	acetolactate synthase	ilvB	-	2.2.1.6	ko:K01652	ko00290,ko00650,ko00660,ko00770,ko01100,ko01110,ko01130,ko01210,ko01230,map00290,map00650,map00660,map00770,map01100,map01110,map01130,map01210,map01230	M00019,M00570	R00006,R00014,R00226,R03050,R04672,R04673,R08648	RC00027,RC00106,RC01192,RC02744,RC02893	ko00000,ko00001,ko00002,ko01000	-	-	-	TPP_enzyme_C,TPP_enzyme_M,TPP_enzyme_N
Bu5_09960	883067.HMPREF9237_00703	1.05e-291	813.0	COG0028@1|root,COG0028@2|Bacteria,2GKU4@201174|Actinobacteria,4D30B@85005|Actinomycetales	201174|Actinobacteria	H	acetolactate synthase	ilvB	-	2.2.1.6	ko:K01652	ko00290,ko00650,ko00660,ko00770,ko01100,ko01110,ko01130,ko01210,ko01230,map00290,map00650,map00660,map00770,map01100,map01110,map01130,map01210,map01230	M00019,M00570	R00006,R00014,R00226,R03050,R04672,R04673,R08648	RC00027,RC00106,RC01192,RC02744,RC02893	ko00000,ko00001,ko00002,ko01000	-	-	-	TPP_enzyme_C,TPP_enzyme_M,TPP_enzyme_N
DSM_20630_04395	883067.HMPREF9237_00703	5.25e-267	748.0	COG0028@1|root,COG0028@2|Bacteria,2GKU4@201174|Actinobacteria,4D30B@85005|Actinomycetales	201174|Actinobacteria	H	acetolactate synthase	ilvB	-	2.2.1.6	ko:K01652	ko00290,ko00650,ko00660,ko00770,ko01100,ko01110,ko01130,ko01210,ko01230,map00290,map00650,map00660,map00770,map01100,map01110,map01130,map01210,map01230	M00019,M00570	R00006,R00014,R00226,R03050,R04672,R04673,R08648	RC00027,RC00106,RC01192,RC02744,RC02893	ko00000,ko00001,ko00002,ko01000	-	-	-	TPP_enzyme_C,TPP_enzyme_M,TPP_enzyme_N
MS249_05410	883067.HMPREF9237_00703	1.05e-291	813.0	COG0028@1|root,COG0028@2|Bacteria,2GKU4@201174|Actinobacteria,4D30B@85005|Actinomycetales	201174|Actinobacteria	H	acetolactate synthase	ilvB	-	2.2.1.6	ko:K01652	ko00290,ko00650,ko00660,ko00770,ko01100,ko01110,ko01130,ko01210,ko01230,map00290,map00650,map00660,map00770,map01100,map01110,map01130,map01210,map01230	M00019,M00570	R00006,R00014,R00226,R03050,R04672,R04673,R08648	RC00027,RC00106,RC01192,RC02744,RC02893	ko00000,ko00001,ko00002,ko01000	-	-	-	TPP_enzyme_C,TPP_enzyme_M,TPP_enzyme_N
NCTC5224_07040	883067.HMPREF9237_00703	5.25e-267	748.0	COG0028@1|root,COG0028@2|Bacteria,2GKU4@201174|Actinobacteria,4D30B@85005|Actinomycetales	201174|Actinobacteria	H	acetolactate synthase	ilvB	-	2.2.1.6	ko:K01652	ko00290,ko00650,ko00660,ko00770,ko01100,ko01110,ko01130,ko01210,ko01230,map00290,map00650,map00660,map00770,map01100,map01110,map01130,map01210,map01230	M00019,M00570	R00006,R00014,R00226,R03050,R04672,R04673,R08648	RC00027,RC00106,RC01192,RC02744,RC02893	ko00000,ko00001,ko00002,ko01000	-	-	-	TPP_enzyme_C,TPP_enzyme_M,TPP_enzyme_N
SH01_03405	1227261.HMPREF0043_00169	2.51e-291	811.0	COG0028@1|root,COG0028@2|Bacteria,2GKU4@201174|Actinobacteria,4D30B@85005|Actinomycetales	201174|Actinobacteria	H	acetolactate synthase	ilvB	-	2.2.1.6	ko:K01652	ko00290,ko00650,ko00660,ko00770,ko01100,ko01110,ko01130,ko01210,ko01230,map00290,map00650,map00660,map00770,map01100,map01110,map01130,map01210,map01230	M00019,M00570	R00006,R00014,R00226,R03050,R04672,R04673,R08648	RC00027,RC00106,RC01192,RC02744,RC02893	ko00000,ko00001,ko00002,ko01000	-	-	-	TPP_enzyme_C,TPP_enzyme_M,TPP_enzyme_N
SH02_05455	883067.HMPREF9237_00703	6.03e-291	811.0	COG0028@1|root,COG0028@2|Bacteria,2GKU4@201174|Actinobacteria,4D30B@85005|Actinomycetales	201174|Actinobacteria	H	acetolactate synthase	ilvB	-	2.2.1.6	ko:K01652	ko00290,ko00650,ko00660,ko00770,ko01100,ko01110,ko01130,ko01210,ko01230,map00290,map00650,map00660,map00770,map01100,map01110,map01130,map01210,map01230	M00019,M00570	R00006,R00014,R00226,R03050,R04672,R04673,R08648	RC00027,RC00106,RC01192,RC02744,RC02893	ko00000,ko00001,ko00002,ko01000	-	-	-	TPP_enzyme_C,TPP_enzyme_M,TPP_enzyme_N
SH03_05965	883067.HMPREF9237_00703	6.03e-291	811.0	COG0028@1|root,COG0028@2|Bacteria,2GKU4@201174|Actinobacteria,4D30B@85005|Actinomycetales	201174|Actinobacteria	H	acetolactate synthase	ilvB	-	2.2.1.6	ko:K01652	ko00290,ko00650,ko00660,ko00770,ko01100,ko01110,ko01130,ko01210,ko01230,map00290,map00650,map00660,map00770,map01100,map01110,map01130,map01210,map01230	M00019,M00570	R00006,R00014,R00226,R03050,R04672,R04673,R08648	RC00027,RC00106,RC01192,RC02744,RC02893	ko00000,ko00001,ko00002,ko01000	-	-	-	TPP_enzyme_C,TPP_enzyme_M,TPP_enzyme_N
TP1_01500	883067.HMPREF9237_00703	1.05e-291	813.0	COG0028@1|root,COG0028@2|Bacteria,2GKU4@201174|Actinobacteria,4D30B@85005|Actinomycetales	201174|Actinobacteria	H	acetolactate synthase	ilvB	-	2.2.1.6	ko:K01652	ko00290,ko00650,ko00660,ko00770,ko01100,ko01110,ko01130,ko01210,ko01230,map00290,map00650,map00660,map00770,map01100,map01110,map01130,map01210,map01230	M00019,M00570	R00006,R00014,R00226,R03050,R04672,R04673,R08648	RC00027,RC00106,RC01192,RC02744,RC02893	ko00000,ko00001,ko00002,ko01000	-	-	-	TPP_enzyme_C,TPP_enzyme_M,TPP_enzyme_N
TP2_07395	1227261.HMPREF0043_00169	3.56e-291	810.0	COG0028@1|root,COG0028@2|Bacteria,2GKU4@201174|Actinobacteria,4D30B@85005|Actinomycetales	201174|Actinobacteria	H	acetolactate synthase	ilvB	-	2.2.1.6	ko:K01652	ko00290,ko00650,ko00660,ko00770,ko01100,ko01110,ko01130,ko01210,ko01230,map00290,map00650,map00660,map00770,map01100,map01110,map01130,map01210,map01230	M00019,M00570	R00006,R00014,R00226,R03050,R04672,R04673,R08648	RC00027,RC00106,RC01192,RC02744,RC02893	ko00000,ko00001,ko00002,ko01000	-	-	-	TPP_enzyme_C,TPP_enzyme_M,TPP_enzyme_N
TP3_05205	883067.HMPREF9237_00703	1.82e-292	815.0	COG0028@1|root,COG0028@2|Bacteria,2GKU4@201174|Actinobacteria,4D30B@85005|Actinomycetales	201174|Actinobacteria	H	acetolactate synthase	ilvB	-	2.2.1.6	ko:K01652	ko00290,ko00650,ko00660,ko00770,ko01100,ko01110,ko01130,ko01210,ko01230,map00290,map00650,map00660,map00770,map01100,map01110,map01130,map01210,map01230	M00019,M00570	R00006,R00014,R00226,R03050,R04672,R04673,R08648	RC00027,RC00106,RC01192,RC02744,RC02893	ko00000,ko00001,ko00002,ko01000	-	-	-	TPP_enzyme_C,TPP_enzyme_M,TPP_enzyme_N
TP4_10595	1227261.HMPREF0043_00169	2.51e-291	811.0	COG0028@1|root,COG0028@2|Bacteria,2GKU4@201174|Actinobacteria,4D30B@85005|Actinomycetales	201174|Actinobacteria	H	acetolactate synthase	ilvB	-	2.2.1.6	ko:K01652	ko00290,ko00650,ko00660,ko00770,ko01100,ko01110,ko01130,ko01210,ko01230,map00290,map00650,map00660,map00770,map01100,map01110,map01130,map01210,map01230	M00019,M00570	R00006,R00014,R00226,R03050,R04672,R04673,R08648	RC00027,RC00106,RC01192,RC02744,RC02893	ko00000,ko00001,ko00002,ko01000	-	-	-	TPP_enzyme_C,TPP_enzyme_M,TPP_enzyme_N
TP4479_00685	883067.HMPREF9237_00703	1.82e-292	815.0	COG0028@1|root,COG0028@2|Bacteria,2GKU4@201174|Actinobacteria,4D30B@85005|Actinomycetales	201174|Actinobacteria	H	acetolactate synthase	ilvB	-	2.2.1.6	ko:K01652	ko00290,ko00650,ko00660,ko00770,ko01100,ko01110,ko01130,ko01210,ko01230,map00290,map00650,map00660,map00770,map01100,map01110,map01130,map01210,map01230	M00019,M00570	R00006,R00014,R00226,R03050,R04672,R04673,R08648	RC00027,RC00106,RC01192,RC02744,RC02893	ko00000,ko00001,ko00002,ko01000	-	-	-	TPP_enzyme_C,TPP_enzyme_M,TPP_enzyme_N
TP8_07570	883067.HMPREF9237_00703	1.05e-291	813.0	COG0028@1|root,COG0028@2|Bacteria,2GKU4@201174|Actinobacteria,4D30B@85005|Actinomycetales	201174|Actinobacteria	H	acetolactate synthase	ilvB	-	2.2.1.6	ko:K01652	ko00290,ko00650,ko00660,ko00770,ko01100,ko01110,ko01130,ko01210,ko01230,map00290,map00650,map00660,map00770,map01100,map01110,map01130,map01210,map01230	M00019,M00570	R00006,R00014,R00226,R03050,R04672,R04673,R08648	RC00027,RC00106,RC01192,RC02744,RC02893	ko00000,ko00001,ko00002,ko01000	-	-	-	TPP_enzyme_C,TPP_enzyme_M,TPP_enzyme_N
TP_2849_02610	883067.HMPREF9237_00703	1.82e-292	815.0	COG0028@1|root,COG0028@2|Bacteria,2GKU4@201174|Actinobacteria,4D30B@85005|Actinomycetales	201174|Actinobacteria	H	acetolactate synthase	ilvB	-	2.2.1.6	ko:K01652	ko00290,ko00650,ko00660,ko00770,ko01100,ko01110,ko01130,ko01210,ko01230,map00290,map00650,map00660,map00770,map01100,map01110,map01130,map01210,map01230	M00019,M00570	R00006,R00014,R00226,R03050,R04672,R04673,R08648	RC00027,RC00106,RC01192,RC02744,RC02893	ko00000,ko00001,ko00002,ko01000	-	-	-	TPP_enzyme_C,TPP_enzyme_M,TPP_enzyme_N
UFV1_01780	1227261.HMPREF0043_00169	8.77e-292	812.0	COG0028@1|root,COG0028@2|Bacteria,2GKU4@201174|Actinobacteria,4D30B@85005|Actinomycetales	201174|Actinobacteria	H	acetolactate synthase	ilvB	-	2.2.1.6	ko:K01652	ko00290,ko00650,ko00660,ko00770,ko01100,ko01110,ko01130,ko01210,ko01230,map00290,map00650,map00660,map00770,map01100,map01110,map01130,map01210,map01230	M00019,M00570	R00006,R00014,R00226,R03050,R04672,R04673,R08648	RC00027,RC00106,RC01192,RC02744,RC02893	ko00000,ko00001,ko00002,ko01000	-	-	-	TPP_enzyme_C,TPP_enzyme_M,TPP_enzyme_N
jx18_01230	883067.HMPREF9237_00703	1.82e-292	815.0	COG0028@1|root,COG0028@2|Bacteria,2GKU4@201174|Actinobacteria,4D30B@85005|Actinomycetales	201174|Actinobacteria	H	acetolactate synthase	ilvB	-	2.2.1.6	ko:K01652	ko00290,ko00650,ko00660,ko00770,ko01100,ko01110,ko01130,ko01210,ko01230,map00290,map00650,map00660,map00770,map01100,map01110,map01130,map01210,map01230	M00019,M00570	R00006,R00014,R00226,R03050,R04672,R04673,R08648	RC00027,RC00106,RC01192,RC02744,RC02893	ko00000,ko00001,ko00002,ko01000	-	-	-	TPP_enzyme_C,TPP_enzyme_M,TPP_enzyme_N
TP6375_10015	644284.Arch_0296	1.17e-278	767.0	COG0649@1|root,COG0649@2|Bacteria,2GKEZ@201174|Actinobacteria,4D3GV@85005|Actinomycetales	201174|Actinobacteria	C	NDH-1 shuttles electrons from NADH, via FMN and iron- sulfur (Fe-S) centers, to quinones in the respiratory chain. The immediate electron acceptor for the enzyme in this species is believed to be a menaquinone. Couples the redox reaction to proton translocation (for every two electrons transferred, four hydrogen ions are translocated across the cytoplasmic membrane), and thus conserves the redox …	nuoD	GO:0005575,GO:0005623,GO:0005886,GO:0016020,GO:0044464,GO:0071944	1.6.5.3	ko:K00333	ko00190,ko01100,map00190,map01100	M00144	R11945	RC00061	ko00000,ko00001,ko00002,ko01000	3.D.1	-	-	Complex1_49kDa
2012CQ_ZSH_00765	644284.Arch_0296	1.17e-278	767.0	COG0649@1|root,COG0649@2|Bacteria,2GKEZ@201174|Actinobacteria,4D3GV@85005|Actinomycetales	201174|Actinobacteria	C	NDH-1 shuttles electrons from NADH, via FMN and iron- sulfur (Fe-S) centers, to quinones in the respiratory chain. The immediate electron acceptor for the enzyme in this species is believed to be a menaquinone. Couples the redox reaction to proton translocation (for every two electrons transferred, four hydrogen ions are translocated across the cytoplasmic membrane), and thus conserves the redox …	nuoD	GO:0005575,GO:0005623,GO:0005886,GO:0016020,GO:0044464,GO:0071944	1.6.5.3	ko:K00333	ko00190,ko01100,map00190,map01100	M00144	R11945	RC00061	ko00000,ko00001,ko00002,ko01000	3.D.1	-	-	Complex1_49kDa
Arash114_10050	644284.Arch_0296	1.17e-278	767.0	COG0649@1|root,COG0649@2|Bacteria,2GKEZ@201174|Actinobacteria,4D3GV@85005|Actinomycetales	201174|Actinobacteria	C	NDH-1 shuttles electrons from NADH, via FMN and iron- sulfur (Fe-S) centers, to quinones in the respiratory chain. The immediate electron acceptor for the enzyme in this species is believed to be a menaquinone. Couples the redox reaction to proton translocation (for every two electrons transferred, four hydrogen ions are translocated across the cytoplasmic membrane), and thus conserves the redox …	nuoD	GO:0005575,GO:0005623,GO:0005886,GO:0016020,GO:0044464,GO:0071944	1.6.5.3	ko:K00333	ko00190,ko01100,map00190,map01100	M00144	R11945	RC00061	ko00000,ko00001,ko00002,ko01000	3.D.1	-	-	Complex1_49kDa
Bu5_08650	644284.Arch_0296	1.17e-278	767.0	COG0649@1|root,COG0649@2|Bacteria,2GKEZ@201174|Actinobacteria,4D3GV@85005|Actinomycetales	201174|Actinobacteria	C	NDH-1 shuttles electrons from NADH, via FMN and iron- sulfur (Fe-S) centers, to quinones in the respiratory chain. The immediate electron acceptor for the enzyme in this species is believed to be a menaquinone. Couples the redox reaction to proton translocation (for every two electrons transferred, four hydrogen ions are translocated across the cytoplasmic membrane), and thus conserves the redox …	nuoD	GO:0005575,GO:0005623,GO:0005886,GO:0016020,GO:0044464,GO:0071944	1.6.5.3	ko:K00333	ko00190,ko01100,map00190,map01100	M00144	R11945	RC00061	ko00000,ko00001,ko00002,ko01000	3.D.1	-	-	Complex1_49kDa
DSM_20630_06970	644284.Arch_0296	1.17e-278	767.0	COG0649@1|root,COG0649@2|Bacteria,2GKEZ@201174|Actinobacteria,4D3GV@85005|Actinomycetales	201174|Actinobacteria	C	NDH-1 shuttles electrons from NADH, via FMN and iron- sulfur (Fe-S) centers, to quinones in the respiratory chain. The immediate electron acceptor for the enzyme in this species is believed to be a menaquinone. Couples the redox reaction to proton translocation (for every two electrons transferred, four hydrogen ions are translocated across the cytoplasmic membrane), and thus conserves the redox …	nuoD	GO:0005575,GO:0005623,GO:0005886,GO:0016020,GO:0044464,GO:0071944	1.6.5.3	ko:K00333	ko00190,ko01100,map00190,map01100	M00144	R11945	RC00061	ko00000,ko00001,ko00002,ko01000	3.D.1	-	-	Complex1_49kDa
MS249_08230	644284.Arch_0296	9.57e-278	764.0	COG0649@1|root,COG0649@2|Bacteria,2GKEZ@201174|Actinobacteria,4D3GV@85005|Actinomycetales	201174|Actinobacteria	C	NDH-1 shuttles electrons from NADH, via FMN and iron- sulfur (Fe-S) centers, to quinones in the respiratory chain. The immediate electron acceptor for the enzyme in this species is believed to be a menaquinone. Couples the redox reaction to proton translocation (for every two electrons transferred, four hydrogen ions are translocated across the cytoplasmic membrane), and thus conserves the redox …	nuoD	GO:0005575,GO:0005623,GO:0005886,GO:0016020,GO:0044464,GO:0071944	1.6.5.3	ko:K00333	ko00190,ko01100,map00190,map01100	M00144	R11945	RC00061	ko00000,ko00001,ko00002,ko01000	3.D.1	-	-	Complex1_49kDa
NCTC5224_07830	644284.Arch_0296	1.17e-278	767.0	COG0649@1|root,COG0649@2|Bacteria,2GKEZ@201174|Actinobacteria,4D3GV@85005|Actinomycetales	201174|Actinobacteria	C	NDH-1 shuttles electrons from NADH, via FMN and iron- sulfur (Fe-S) centers, to quinones in the respiratory chain. The immediate electron acceptor for the enzyme in this species is believed to be a menaquinone. Couples the redox reaction to proton translocation (for every two electrons transferred, four hydrogen ions are translocated across the cytoplasmic membrane), and thus conserves the redox …	nuoD	GO:0005575,GO:0005623,GO:0005886,GO:0016020,GO:0044464,GO:0071944	1.6.5.3	ko:K00333	ko00190,ko01100,map00190,map01100	M00144	R11945	RC00061	ko00000,ko00001,ko00002,ko01000	3.D.1	-	-	Complex1_49kDa
SH01_06685	644284.Arch_0296	2.35e-278	766.0	COG0649@1|root,COG0649@2|Bacteria,2GKEZ@201174|Actinobacteria,4D3GV@85005|Actinomycetales	201174|Actinobacteria	C	NDH-1 shuttles electrons from NADH, via FMN and iron- sulfur (Fe-S) centers, to quinones in the respiratory chain. The immediate electron acceptor for the enzyme in this species is believed to be a menaquinone. Couples the redox reaction to proton translocation (for every two electrons transferred, four hydrogen ions are translocated across the cytoplasmic membrane), and thus conserves the redox …	nuoD	GO:0005575,GO:0005623,GO:0005886,GO:0016020,GO:0044464,GO:0071944	1.6.5.3	ko:K00333	ko00190,ko01100,map00190,map01100	M00144	R11945	RC00061	ko00000,ko00001,ko00002,ko01000	3.D.1	-	-	Complex1_49kDa
SH02_07145	644284.Arch_0296	1.17e-278	767.0	COG0649@1|root,COG0649@2|Bacteria,2GKEZ@201174|Actinobacteria,4D3GV@85005|Actinomycetales	201174|Actinobacteria	C	NDH-1 shuttles electrons from NADH, via FMN and iron- sulfur (Fe-S) centers, to quinones in the respiratory chain. The immediate electron acceptor for the enzyme in this species is believed to be a menaquinone. Couples the redox reaction to proton translocation (for every two electrons transferred, four hydrogen ions are translocated across the cytoplasmic membrane), and thus conserves the redox …	nuoD	GO:0005575,GO:0005623,GO:0005886,GO:0016020,GO:0044464,GO:0071944	1.6.5.3	ko:K00333	ko00190,ko01100,map00190,map01100	M00144	R11945	RC00061	ko00000,ko00001,ko00002,ko01000	3.D.1	-	-	Complex1_49kDa
SH03_10280	644284.Arch_0296	1.17e-278	767.0	COG0649@1|root,COG0649@2|Bacteria,2GKEZ@201174|Actinobacteria,4D3GV@85005|Actinomycetales	201174|Actinobacteria	C	NDH-1 shuttles electrons from NADH, via FMN and iron- sulfur (Fe-S) centers, to quinones in the respiratory chain. The immediate electron acceptor for the enzyme in this species is believed to be a menaquinone. Couples the redox reaction to proton translocation (for every two electrons transferred, four hydrogen ions are translocated across the cytoplasmic membrane), and thus conserves the redox …	nuoD	GO:0005575,GO:0005623,GO:0005886,GO:0016020,GO:0044464,GO:0071944	1.6.5.3	ko:K00333	ko00190,ko01100,map00190,map01100	M00144	R11945	RC00061	ko00000,ko00001,ko00002,ko01000	3.D.1	-	-	Complex1_49kDa
TP1_00685	644284.Arch_0296	1.17e-278	767.0	COG0649@1|root,COG0649@2|Bacteria,2GKEZ@201174|Actinobacteria,4D3GV@85005|Actinomycetales	201174|Actinobacteria	C	NDH-1 shuttles electrons from NADH, via FMN and iron- sulfur (Fe-S) centers, to quinones in the respiratory chain. The immediate electron acceptor for the enzyme in this species is believed to be a menaquinone. Couples the redox reaction to proton translocation (for every two electrons transferred, four hydrogen ions are translocated across the cytoplasmic membrane), and thus conserves the redox …	nuoD	GO:0005575,GO:0005623,GO:0005886,GO:0016020,GO:0044464,GO:0071944	1.6.5.3	ko:K00333	ko00190,ko01100,map00190,map01100	M00144	R11945	RC00061	ko00000,ko00001,ko00002,ko01000	3.D.1	-	-	Complex1_49kDa
TP2_06570	644284.Arch_0296	1.17e-278	767.0	COG0649@1|root,COG0649@2|Bacteria,2GKEZ@201174|Actinobacteria,4D3GV@85005|Actinomycetales	201174|Actinobacteria	C	NDH-1 shuttles electrons from NADH, via FMN and iron- sulfur (Fe-S) centers, to quinones in the respiratory chain. The immediate electron acceptor for the enzyme in this species is believed to be a menaquinone. Couples the redox reaction to proton translocation (for every two electrons transferred, four hydrogen ions are translocated across the cytoplasmic membrane), and thus conserves the redox …	nuoD	GO:0005575,GO:0005623,GO:0005886,GO:0016020,GO:0044464,GO:0071944	1.6.5.3	ko:K00333	ko00190,ko01100,map00190,map01100	M00144	R11945	RC00061	ko00000,ko00001,ko00002,ko01000	3.D.1	-	-	Complex1_49kDa
TP3_06030	644284.Arch_0296	2.74e-277	763.0	COG0649@1|root,COG0649@2|Bacteria,2GKEZ@201174|Actinobacteria,4D3GV@85005|Actinomycetales	201174|Actinobacteria	C	NDH-1 shuttles electrons from NADH, via FMN and iron- sulfur (Fe-S) centers, to quinones in the respiratory chain. The immediate electron acceptor for the enzyme in this species is believed to be a menaquinone. Couples the redox reaction to proton translocation (for every two electrons transferred, four hydrogen ions are translocated across the cytoplasmic membrane), and thus conserves the redox …	nuoD	GO:0005575,GO:0005623,GO:0005886,GO:0016020,GO:0044464,GO:0071944	1.6.5.3	ko:K00333	ko00190,ko01100,map00190,map01100	M00144	R11945	RC00061	ko00000,ko00001,ko00002,ko01000	3.D.1	-	-	Complex1_49kDa
TP4_09780	644284.Arch_0296	1.17e-278	767.0	COG0649@1|root,COG0649@2|Bacteria,2GKEZ@201174|Actinobacteria,4D3GV@85005|Actinomycetales	201174|Actinobacteria	C	NDH-1 shuttles electrons from NADH, via FMN and iron- sulfur (Fe-S) centers, to quinones in the respiratory chain. The immediate electron acceptor for the enzyme in this species is believed to be a menaquinone. Couples the redox reaction to proton translocation (for every two electrons transferred, four hydrogen ions are translocated across the cytoplasmic membrane), and thus conserves the redox …	nuoD	GO:0005575,GO:0005623,GO:0005886,GO:0016020,GO:0044464,GO:0071944	1.6.5.3	ko:K00333	ko00190,ko01100,map00190,map01100	M00144	R11945	RC00061	ko00000,ko00001,ko00002,ko01000	3.D.1	-	-	Complex1_49kDa
TP4479_01515	644284.Arch_0296	2.74e-277	763.0	COG0649@1|root,COG0649@2|Bacteria,2GKEZ@201174|Actinobacteria,4D3GV@85005|Actinomycetales	201174|Actinobacteria	C	NDH-1 shuttles electrons from NADH, via FMN and iron- sulfur (Fe-S) centers, to quinones in the respiratory chain. The immediate electron acceptor for the enzyme in this species is believed to be a menaquinone. Couples the redox reaction to proton translocation (for every two electrons transferred, four hydrogen ions are translocated across the cytoplasmic membrane), and thus conserves the redox …	nuoD	GO:0005575,GO:0005623,GO:0005886,GO:0016020,GO:0044464,GO:0071944	1.6.5.3	ko:K00333	ko00190,ko01100,map00190,map01100	M00144	R11945	RC00061	ko00000,ko00001,ko00002,ko01000	3.D.1	-	-	Complex1_49kDa
TP8_08355	644284.Arch_0296	1.17e-278	767.0	COG0649@1|root,COG0649@2|Bacteria,2GKEZ@201174|Actinobacteria,4D3GV@85005|Actinomycetales	201174|Actinobacteria	C	NDH-1 shuttles electrons from NADH, via FMN and iron- sulfur (Fe-S) centers, to quinones in the respiratory chain. The immediate electron acceptor for the enzyme in this species is believed to be a menaquinone. Couples the redox reaction to proton translocation (for every two electrons transferred, four hydrogen ions are translocated across the cytoplasmic membrane), and thus conserves the redox …	nuoD	GO:0005575,GO:0005623,GO:0005886,GO:0016020,GO:0044464,GO:0071944	1.6.5.3	ko:K00333	ko00190,ko01100,map00190,map01100	M00144	R11945	RC00061	ko00000,ko00001,ko00002,ko01000	3.D.1	-	-	Complex1_49kDa
TP_2849_03435	644284.Arch_0296	2.74e-277	763.0	COG0649@1|root,COG0649@2|Bacteria,2GKEZ@201174|Actinobacteria,4D3GV@85005|Actinomycetales	201174|Actinobacteria	C	NDH-1 shuttles electrons from NADH, via FMN and iron- sulfur (Fe-S) centers, to quinones in the respiratory chain. The immediate electron acceptor for the enzyme in this species is believed to be a menaquinone. Couples the redox reaction to proton translocation (for every two electrons transferred, four hydrogen ions are translocated across the cytoplasmic membrane), and thus conserves the redox …	nuoD	GO:0005575,GO:0005623,GO:0005886,GO:0016020,GO:0044464,GO:0071944	1.6.5.3	ko:K00333	ko00190,ko01100,map00190,map01100	M00144	R11945	RC00061	ko00000,ko00001,ko00002,ko01000	3.D.1	-	-	Complex1_49kDa
UFV1_06190	644284.Arch_0296	1.17e-278	767.0	COG0649@1|root,COG0649@2|Bacteria,2GKEZ@201174|Actinobacteria,4D3GV@85005|Actinomycetales	201174|Actinobacteria	C	NDH-1 shuttles electrons from NADH, via FMN and iron- sulfur (Fe-S) centers, to quinones in the respiratory chain. The immediate electron acceptor for the enzyme in this species is believed to be a menaquinone. Couples the redox reaction to proton translocation (for every two electrons transferred, four hydrogen ions are translocated across the cytoplasmic membrane), and thus conserves the redox …	nuoD	GO:0005575,GO:0005623,GO:0005886,GO:0016020,GO:0044464,GO:0071944	1.6.5.3	ko:K00333	ko00190,ko01100,map00190,map01100	M00144	R11945	RC00061	ko00000,ko00001,ko00002,ko01000	3.D.1	-	-	Complex1_49kDa
jx18_00420	644284.Arch_0296	2.74e-277	763.0	COG0649@1|root,COG0649@2|Bacteria,2GKEZ@201174|Actinobacteria,4D3GV@85005|Actinomycetales	201174|Actinobacteria	C	NDH-1 shuttles electrons from NADH, via FMN and iron- sulfur (Fe-S) centers, to quinones in the respiratory chain. The immediate electron acceptor for the enzyme in this species is believed to be a menaquinone. Couples the redox reaction to proton translocation (for every two electrons transferred, four hydrogen ions are translocated across the cytoplasmic membrane), and thus conserves the redox …	nuoD	GO:0005575,GO:0005623,GO:0005886,GO:0016020,GO:0044464,GO:0071944	1.6.5.3	ko:K00333	ko00190,ko01100,map00190,map01100	M00144	R11945	RC00061	ko00000,ko00001,ko00002,ko01000	3.D.1	-	-	Complex1_49kDa
TP6375_10200	1219581.HMPREF1628_06890	6.28e-155	442.0	COG0329@1|root,COG0329@2|Bacteria,2GJDB@201174|Actinobacteria,4D31T@85005|Actinomycetales	201174|Actinobacteria	EM	Belongs to the DapA family	nanA	-	4.1.3.3,4.3.3.7	ko:K01639,ko:K01714	ko00261,ko00300,ko00520,ko01100,ko01110,ko01120,ko01130,ko01230,map00261,map00300,map00520,map01100,map01110,map01120,map01130,map01230	M00016,M00525,M00526,M00527	R01811,R10147	RC00159,RC00600,RC03062,RC03063	ko00000,ko00001,ko00002,ko01000	-	-	-	DHDPS
2012CQ_ZSH_00570	1219581.HMPREF1628_06890	6.28e-155	442.0	COG0329@1|root,COG0329@2|Bacteria,2GJDB@201174|Actinobacteria,4D31T@85005|Actinomycetales	201174|Actinobacteria	EM	Belongs to the DapA family	nanA	-	4.1.3.3,4.3.3.7	ko:K01639,ko:K01714	ko00261,ko00300,ko00520,ko01100,ko01110,ko01120,ko01130,ko01230,map00261,map00300,map00520,map01100,map01110,map01120,map01130,map01230	M00016,M00525,M00526,M00527	R01811,R10147	RC00159,RC00600,RC03062,RC03063	ko00000,ko00001,ko00002,ko01000	-	-	-	DHDPS
Arash114_10240	1219581.HMPREF1628_06890	8.49e-153	436.0	COG0329@1|root,COG0329@2|Bacteria,2GJDB@201174|Actinobacteria,4D31T@85005|Actinomycetales	201174|Actinobacteria	EM	Belongs to the DapA family	nanA	-	4.1.3.3,4.3.3.7	ko:K01639,ko:K01714	ko00261,ko00300,ko00520,ko01100,ko01110,ko01120,ko01130,ko01230,map00261,map00300,map00520,map01100,map01110,map01120,map01130,map01230	M00016,M00525,M00526,M00527	R01811,R10147	RC00159,RC00600,RC03062,RC03063	ko00000,ko00001,ko00002,ko01000	-	-	-	DHDPS
Bu5_08485	1219581.HMPREF1628_06890	6.28e-155	442.0	COG0329@1|root,COG0329@2|Bacteria,2GJDB@201174|Actinobacteria,4D31T@85005|Actinomycetales	201174|Actinobacteria	EM	Belongs to the DapA family	nanA	-	4.1.3.3,4.3.3.7	ko:K01639,ko:K01714	ko00261,ko00300,ko00520,ko01100,ko01110,ko01120,ko01130,ko01230,map00261,map00300,map00520,map01100,map01110,map01120,map01130,map01230	M00016,M00525,M00526,M00527	R01811,R10147	RC00159,RC00600,RC03062,RC03063	ko00000,ko00001,ko00002,ko01000	-	-	-	DHDPS
DSM_20630_06780	1219581.HMPREF1628_06890	6.28e-155	442.0	COG0329@1|root,COG0329@2|Bacteria,2GJDB@201174|Actinobacteria,4D31T@85005|Actinomycetales	201174|Actinobacteria	EM	Belongs to the DapA family	nanA	-	4.1.3.3,4.3.3.7	ko:K01639,ko:K01714	ko00261,ko00300,ko00520,ko01100,ko01110,ko01120,ko01130,ko01230,map00261,map00300,map00520,map01100,map01110,map01120,map01130,map01230	M00016,M00525,M00526,M00527	R01811,R10147	RC00159,RC00600,RC03062,RC03063	ko00000,ko00001,ko00002,ko01000	-	-	-	DHDPS
MS249_08580	1219581.HMPREF1628_06890	6.28e-155	442.0	COG0329@1|root,COG0329@2|Bacteria,2GJDB@201174|Actinobacteria,4D31T@85005|Actinomycetales	201174|Actinobacteria	EM	Belongs to the DapA family	nanA	-	4.1.3.3,4.3.3.7	ko:K01639,ko:K01714	ko00261,ko00300,ko00520,ko01100,ko01110,ko01120,ko01130,ko01230,map00261,map00300,map00520,map01100,map01110,map01120,map01130,map01230	M00016,M00525,M00526,M00527	R01811,R10147	RC00159,RC00600,RC03062,RC03063	ko00000,ko00001,ko00002,ko01000	-	-	-	DHDPS
NCTC5224_07640	1219581.HMPREF1628_06890	6.28e-155	442.0	COG0329@1|root,COG0329@2|Bacteria,2GJDB@201174|Actinobacteria,4D31T@85005|Actinomycetales	201174|Actinobacteria	EM	Belongs to the DapA family	nanA	-	4.1.3.3,4.3.3.7	ko:K01639,ko:K01714	ko00261,ko00300,ko00520,ko01100,ko01110,ko01120,ko01130,ko01230,map00261,map00300,map00520,map01100,map01110,map01120,map01130,map01230	M00016,M00525,M00526,M00527	R01811,R10147	RC00159,RC00600,RC03062,RC03063	ko00000,ko00001,ko00002,ko01000	-	-	-	DHDPS
SH01_06500	1219581.HMPREF1628_06890	6.28e-155	442.0	COG0329@1|root,COG0329@2|Bacteria,2GJDB@201174|Actinobacteria,4D31T@85005|Actinomycetales	201174|Actinobacteria	EM	Belongs to the DapA family	nanA	-	4.1.3.3,4.3.3.7	ko:K01639,ko:K01714	ko00261,ko00300,ko00520,ko01100,ko01110,ko01120,ko01130,ko01230,map00261,map00300,map00520,map01100,map01110,map01120,map01130,map01230	M00016,M00525,M00526,M00527	R01811,R10147	RC00159,RC00600,RC03062,RC03063	ko00000,ko00001,ko00002,ko01000	-	-	-	DHDPS
SH02_07330	1219581.HMPREF1628_06890	6.28e-155	442.0	COG0329@1|root,COG0329@2|Bacteria,2GJDB@201174|Actinobacteria,4D31T@85005|Actinomycetales	201174|Actinobacteria	EM	Belongs to the DapA family	nanA	-	4.1.3.3,4.3.3.7	ko:K01639,ko:K01714	ko00261,ko00300,ko00520,ko01100,ko01110,ko01120,ko01130,ko01230,map00261,map00300,map00520,map01100,map01110,map01120,map01130,map01230	M00016,M00525,M00526,M00527	R01811,R10147	RC00159,RC00600,RC03062,RC03063	ko00000,ko00001,ko00002,ko01000	-	-	-	DHDPS
SH03_10090	1219581.HMPREF1628_06890	6.28e-155	442.0	COG0329@1|root,COG0329@2|Bacteria,2GJDB@201174|Actinobacteria,4D31T@85005|Actinomycetales	201174|Actinobacteria	EM	Belongs to the DapA family	nanA	-	4.1.3.3,4.3.3.7	ko:K01639,ko:K01714	ko00261,ko00300,ko00520,ko01100,ko01110,ko01120,ko01130,ko01230,map00261,map00300,map00520,map01100,map01110,map01120,map01130,map01230	M00016,M00525,M00526,M00527	R01811,R10147	RC00159,RC00600,RC03062,RC03063	ko00000,ko00001,ko00002,ko01000	-	-	-	DHDPS
TP1_00860	1219581.HMPREF1628_06890	6.28e-155	442.0	COG0329@1|root,COG0329@2|Bacteria,2GJDB@201174|Actinobacteria,4D31T@85005|Actinomycetales	201174|Actinobacteria	EM	Belongs to the DapA family	nanA	-	4.1.3.3,4.3.3.7	ko:K01639,ko:K01714	ko00261,ko00300,ko00520,ko01100,ko01110,ko01120,ko01130,ko01230,map00261,map00300,map00520,map01100,map01110,map01120,map01130,map01230	M00016,M00525,M00526,M00527	R01811,R10147	RC00159,RC00600,RC03062,RC03063	ko00000,ko00001,ko00002,ko01000	-	-	-	DHDPS
TP2_06745	1219581.HMPREF1628_06890	6.28e-155	442.0	COG0329@1|root,COG0329@2|Bacteria,2GJDB@201174|Actinobacteria,4D31T@85005|Actinomycetales	201174|Actinobacteria	EM	Belongs to the DapA family	nanA	-	4.1.3.3,4.3.3.7	ko:K01639,ko:K01714	ko00261,ko00300,ko00520,ko01100,ko01110,ko01120,ko01130,ko01230,map00261,map00300,map00520,map01100,map01110,map01120,map01130,map01230	M00016,M00525,M00526,M00527	R01811,R10147	RC00159,RC00600,RC03062,RC03063	ko00000,ko00001,ko00002,ko01000	-	-	-	DHDPS
TP3_05845	1219581.HMPREF1628_06890	8.49e-153	436.0	COG0329@1|root,COG0329@2|Bacteria,2GJDB@201174|Actinobacteria,4D31T@85005|Actinomycetales	201174|Actinobacteria	EM	Belongs to the DapA family	nanA	-	4.1.3.3,4.3.3.7	ko:K01639,ko:K01714	ko00261,ko00300,ko00520,ko01100,ko01110,ko01120,ko01130,ko01230,map00261,map00300,map00520,map01100,map01110,map01120,map01130,map01230	M00016,M00525,M00526,M00527	R01811,R10147	RC00159,RC00600,RC03062,RC03063	ko00000,ko00001,ko00002,ko01000	-	-	-	DHDPS
TP4_09965	1219581.HMPREF1628_06890	6.28e-155	442.0	COG0329@1|root,COG0329@2|Bacteria,2GJDB@201174|Actinobacteria,4D31T@85005|Actinomycetales	201174|Actinobacteria	EM	Belongs to the DapA family	nanA	-	4.1.3.3,4.3.3.7	ko:K01639,ko:K01714	ko00261,ko00300,ko00520,ko01100,ko01110,ko01120,ko01130,ko01230,map00261,map00300,map00520,map01100,map01110,map01120,map01130,map01230	M00016,M00525,M00526,M00527	R01811,R10147	RC00159,RC00600,RC03062,RC03063	ko00000,ko00001,ko00002,ko01000	-	-	-	DHDPS
TP4479_01325	1219581.HMPREF1628_06890	8.49e-153	436.0	COG0329@1|root,COG0329@2|Bacteria,2GJDB@201174|Actinobacteria,4D31T@85005|Actinomycetales	201174|Actinobacteria	EM	Belongs to the DapA family	nanA	-	4.1.3.3,4.3.3.7	ko:K01639,ko:K01714	ko00261,ko00300,ko00520,ko01100,ko01110,ko01120,ko01130,ko01230,map00261,map00300,map00520,map01100,map01110,map01120,map01130,map01230	M00016,M00525,M00526,M00527	R01811,R10147	RC00159,RC00600,RC03062,RC03063	ko00000,ko00001,ko00002,ko01000	-	-	-	DHDPS
TP8_08205	1219581.HMPREF1628_06890	6.28e-155	442.0	COG0329@1|root,COG0329@2|Bacteria,2GJDB@201174|Actinobacteria,4D31T@85005|Actinomycetales	201174|Actinobacteria	EM	Belongs to the DapA family	nanA	-	4.1.3.3,4.3.3.7	ko:K01639,ko:K01714	ko00261,ko00300,ko00520,ko01100,ko01110,ko01120,ko01130,ko01230,map00261,map00300,map00520,map01100,map01110,map01120,map01130,map01230	M00016,M00525,M00526,M00527	R01811,R10147	RC00159,RC00600,RC03062,RC03063	ko00000,ko00001,ko00002,ko01000	-	-	-	DHDPS
TP_2849_03250	1219581.HMPREF1628_06890	8.49e-153	436.0	COG0329@1|root,COG0329@2|Bacteria,2GJDB@201174|Actinobacteria,4D31T@85005|Actinomycetales	201174|Actinobacteria	EM	Belongs to the DapA family	nanA	-	4.1.3.3,4.3.3.7	ko:K01639,ko:K01714	ko00261,ko00300,ko00520,ko01100,ko01110,ko01120,ko01130,ko01230,map00261,map00300,map00520,map01100,map01110,map01120,map01130,map01230	M00016,M00525,M00526,M00527	R01811,R10147	RC00159,RC00600,RC03062,RC03063	ko00000,ko00001,ko00002,ko01000	-	-	-	DHDPS
UFV1_05930	1219581.HMPREF1628_06890	6.28e-155	442.0	COG0329@1|root,COG0329@2|Bacteria,2GJDB@201174|Actinobacteria,4D31T@85005|Actinomycetales	201174|Actinobacteria	EM	Belongs to the DapA family	nanA	-	4.1.3.3,4.3.3.7	ko:K01639,ko:K01714	ko00261,ko00300,ko00520,ko01100,ko01110,ko01120,ko01130,ko01230,map00261,map00300,map00520,map01100,map01110,map01120,map01130,map01230	M00016,M00525,M00526,M00527	R01811,R10147	RC00159,RC00600,RC03062,RC03063	ko00000,ko00001,ko00002,ko01000	-	-	-	DHDPS
jx18_00605	1219581.HMPREF1628_06890	6.28e-155	442.0	COG0329@1|root,COG0329@2|Bacteria,2GJDB@201174|Actinobacteria,4D31T@85005|Actinomycetales	201174|Actinobacteria	EM	Belongs to the DapA family	nanA	-	4.1.3.3,4.3.3.7	ko:K01639,ko:K01714	ko00261,ko00300,ko00520,ko01100,ko01110,ko01120,ko01130,ko01230,map00261,map00300,map00520,map01100,map01110,map01120,map01130,map01230	M00016,M00525,M00526,M00527	R01811,R10147	RC00159,RC00600,RC03062,RC03063	ko00000,ko00001,ko00002,ko01000	-	-	-	DHDPS
TP6375_04745	1115803.HMPREF1129_1395	1.44e-86	255.0	COG0197@1|root,COG0197@2|Bacteria,2IFEI@201174|Actinobacteria,4D5HT@85005|Actinomycetales	201174|Actinobacteria	J	Binds 23S rRNA and is also seen to make contacts with the A and possibly P site tRNAs	rplP	GO:0003674,GO:0003676,GO:0003723,GO:0003735,GO:0005198,GO:0005488,GO:0005575,GO:0005622,GO:0005623,GO:0005737,GO:0005829,GO:0005840,GO:0005886,GO:0008150,GO:0015934,GO:0016020,GO:0019843,GO:0022625,GO:0022626,GO:0032991,GO:0040007,GO:0043226,GO:0043228,GO:0043229,GO:0043232,GO:0044391,GO:0044422,GO:0044424,GO:0044444,GO:0044445,GO:0044446,GO:0044464,GO:0071944,GO:0097159,GO:1901363,GO:1990904	-	ko:K02878	ko03010,map03010	M00178	-	-	br01610,ko00000,ko00001,ko00002,ko03011	-	-	-	Ribosomal_L16
2012CQ_ZSH_05775	1115803.HMPREF1129_1395	1.44e-86	255.0	COG0197@1|root,COG0197@2|Bacteria,2IFEI@201174|Actinobacteria,4D5HT@85005|Actinomycetales	201174|Actinobacteria	J	Binds 23S rRNA and is also seen to make contacts with the A and possibly P site tRNAs	rplP	GO:0003674,GO:0003676,GO:0003723,GO:0003735,GO:0005198,GO:0005488,GO:0005575,GO:0005622,GO:0005623,GO:0005737,GO:0005829,GO:0005840,GO:0005886,GO:0008150,GO:0015934,GO:0016020,GO:0019843,GO:0022625,GO:0022626,GO:0032991,GO:0040007,GO:0043226,GO:0043228,GO:0043229,GO:0043232,GO:0044391,GO:0044422,GO:0044424,GO:0044444,GO:0044445,GO:0044446,GO:0044464,GO:0071944,GO:0097159,GO:1901363,GO:1990904	-	ko:K02878	ko03010,map03010	M00178	-	-	br01610,ko00000,ko00001,ko00002,ko03011	-	-	-	Ribosomal_L16
Arash114_04745	1115803.HMPREF1129_1395	1.44e-86	255.0	COG0197@1|root,COG0197@2|Bacteria,2IFEI@201174|Actinobacteria,4D5HT@85005|Actinomycetales	201174|Actinobacteria	J	Binds 23S rRNA and is also seen to make contacts with the A and possibly P site tRNAs	rplP	GO:0003674,GO:0003676,GO:0003723,GO:0003735,GO:0005198,GO:0005488,GO:0005575,GO:0005622,GO:0005623,GO:0005737,GO:0005829,GO:0005840,GO:0005886,GO:0008150,GO:0015934,GO:0016020,GO:0019843,GO:0022625,GO:0022626,GO:0032991,GO:0040007,GO:0043226,GO:0043228,GO:0043229,GO:0043232,GO:0044391,GO:0044422,GO:0044424,GO:0044444,GO:0044445,GO:0044446,GO:0044464,GO:0071944,GO:0097159,GO:1901363,GO:1990904	-	ko:K02878	ko03010,map03010	M00178	-	-	br01610,ko00000,ko00001,ko00002,ko03011	-	-	-	Ribosomal_L16
Bu5_01645	1115803.HMPREF1129_1395	1.44e-86	255.0	COG0197@1|root,COG0197@2|Bacteria,2IFEI@201174|Actinobacteria,4D5HT@85005|Actinomycetales	201174|Actinobacteria	J	Binds 23S rRNA and is also seen to make contacts with the A and possibly P site tRNAs	rplP	GO:0003674,GO:0003676,GO:0003723,GO:0003735,GO:0005198,GO:0005488,GO:0005575,GO:0005622,GO:0005623,GO:0005737,GO:0005829,GO:0005840,GO:0005886,GO:0008150,GO:0015934,GO:0016020,GO:0019843,GO:0022625,GO:0022626,GO:0032991,GO:0040007,GO:0043226,GO:0043228,GO:0043229,GO:0043232,GO:0044391,GO:0044422,GO:0044424,GO:0044444,GO:0044445,GO:0044446,GO:0044464,GO:0071944,GO:0097159,GO:1901363,GO:1990904	-	ko:K02878	ko03010,map03010	M00178	-	-	br01610,ko00000,ko00001,ko00002,ko03011	-	-	-	Ribosomal_L16
DSM_20630_00365	1115803.HMPREF1129_1395	1.44e-86	255.0	COG0197@1|root,COG0197@2|Bacteria,2IFEI@201174|Actinobacteria,4D5HT@85005|Actinomycetales	201174|Actinobacteria	J	Binds 23S rRNA and is also seen to make contacts with the A and possibly P site tRNAs	rplP	GO:0003674,GO:0003676,GO:0003723,GO:0003735,GO:0005198,GO:0005488,GO:0005575,GO:0005622,GO:0005623,GO:0005737,GO:0005829,GO:0005840,GO:0005886,GO:0008150,GO:0015934,GO:0016020,GO:0019843,GO:0022625,GO:0022626,GO:0032991,GO:0040007,GO:0043226,GO:0043228,GO:0043229,GO:0043232,GO:0044391,GO:0044422,GO:0044424,GO:0044444,GO:0044445,GO:0044446,GO:0044464,GO:0071944,GO:0097159,GO:1901363,GO:1990904	-	ko:K02878	ko03010,map03010	M00178	-	-	br01610,ko00000,ko00001,ko00002,ko03011	-	-	-	Ribosomal_L16
MS249_01920	1115803.HMPREF1129_1395	1.44e-86	255.0	COG0197@1|root,COG0197@2|Bacteria,2IFEI@201174|Actinobacteria,4D5HT@85005|Actinomycetales	201174|Actinobacteria	J	Binds 23S rRNA and is also seen to make contacts with the A and possibly P site tRNAs	rplP	GO:0003674,GO:0003676,GO:0003723,GO:0003735,GO:0005198,GO:0005488,GO:0005575,GO:0005622,GO:0005623,GO:0005737,GO:0005829,GO:0005840,GO:0005886,GO:0008150,GO:0015934,GO:0016020,GO:0019843,GO:0022625,GO:0022626,GO:0032991,GO:0040007,GO:0043226,GO:0043228,GO:0043229,GO:0043232,GO:0044391,GO:0044422,GO:0044424,GO:0044444,GO:0044445,GO:0044446,GO:0044464,GO:0071944,GO:0097159,GO:1901363,GO:1990904	-	ko:K02878	ko03010,map03010	M00178	-	-	br01610,ko00000,ko00001,ko00002,ko03011	-	-	-	Ribosomal_L16
NCTC5224_02765	1115803.HMPREF1129_1395	1.44e-86	255.0	COG0197@1|root,COG0197@2|Bacteria,2IFEI@201174|Actinobacteria,4D5HT@85005|Actinomycetales	201174|Actinobacteria	J	Binds 23S rRNA and is also seen to make contacts with the A and possibly P site tRNAs	rplP	GO:0003674,GO:0003676,GO:0003723,GO:0003735,GO:0005198,GO:0005488,GO:0005575,GO:0005622,GO:0005623,GO:0005737,GO:0005829,GO:0005840,GO:0005886,GO:0008150,GO:0015934,GO:0016020,GO:0019843,GO:0022625,GO:0022626,GO:0032991,GO:0040007,GO:0043226,GO:0043228,GO:0043229,GO:0043232,GO:0044391,GO:0044422,GO:0044424,GO:0044444,GO:0044445,GO:0044446,GO:0044464,GO:0071944,GO:0097159,GO:1901363,GO:1990904	-	ko:K02878	ko03010,map03010	M00178	-	-	br01610,ko00000,ko00001,ko00002,ko03011	-	-	-	Ribosomal_L16
SH01_01625	1115803.HMPREF1129_1395	1.44e-86	255.0	COG0197@1|root,COG0197@2|Bacteria,2IFEI@201174|Actinobacteria,4D5HT@85005|Actinomycetales	201174|Actinobacteria	J	Binds 23S rRNA and is also seen to make contacts with the A and possibly P site tRNAs	rplP	GO:0003674,GO:0003676,GO:0003723,GO:0003735,GO:0005198,GO:0005488,GO:0005575,GO:0005622,GO:0005623,GO:0005737,GO:0005829,GO:0005840,GO:0005886,GO:0008150,GO:0015934,GO:0016020,GO:0019843,GO:0022625,GO:0022626,GO:0032991,GO:0040007,GO:0043226,GO:0043228,GO:0043229,GO:0043232,GO:0044391,GO:0044422,GO:0044424,GO:0044444,GO:0044445,GO:0044446,GO:0044464,GO:0071944,GO:0097159,GO:1901363,GO:1990904	-	ko:K02878	ko03010,map03010	M00178	-	-	br01610,ko00000,ko00001,ko00002,ko03011	-	-	-	Ribosomal_L16
SH02_00180	1115803.HMPREF1129_1395	1.44e-86	255.0	COG0197@1|root,COG0197@2|Bacteria,2IFEI@201174|Actinobacteria,4D5HT@85005|Actinomycetales	201174|Actinobacteria	J	Binds 23S rRNA and is also seen to make contacts with the A and possibly P site tRNAs	rplP	GO:0003674,GO:0003676,GO:0003723,GO:0003735,GO:0005198,GO:0005488,GO:0005575,GO:0005622,GO:0005623,GO:0005737,GO:0005829,GO:0005840,GO:0005886,GO:0008150,GO:0015934,GO:0016020,GO:0019843,GO:0022625,GO:0022626,GO:0032991,GO:0040007,GO:0043226,GO:0043228,GO:0043229,GO:0043232,GO:0044391,GO:0044422,GO:0044424,GO:0044444,GO:0044445,GO:0044446,GO:0044464,GO:0071944,GO:0097159,GO:1901363,GO:1990904	-	ko:K02878	ko03010,map03010	M00178	-	-	br01610,ko00000,ko00001,ko00002,ko03011	-	-	-	Ribosomal_L16
SH03_07150	1115803.HMPREF1129_1395	1.44e-86	255.0	COG0197@1|root,COG0197@2|Bacteria,2IFEI@201174|Actinobacteria,4D5HT@85005|Actinomycetales	201174|Actinobacteria	J	Binds 23S rRNA and is also seen to make contacts with the A and possibly P site tRNAs	rplP	GO:0003674,GO:0003676,GO:0003723,GO:0003735,GO:0005198,GO:0005488,GO:0005575,GO:0005622,GO:0005623,GO:0005737,GO:0005829,GO:0005840,GO:0005886,GO:0008150,GO:0015934,GO:0016020,GO:0019843,GO:0022625,GO:0022626,GO:0032991,GO:0040007,GO:0043226,GO:0043228,GO:0043229,GO:0043232,GO:0044391,GO:0044422,GO:0044424,GO:0044444,GO:0044445,GO:0044446,GO:0044464,GO:0071944,GO:0097159,GO:1901363,GO:1990904	-	ko:K02878	ko03010,map03010	M00178	-	-	br01610,ko00000,ko00001,ko00002,ko03011	-	-	-	Ribosomal_L16
TP1_05800	1115803.HMPREF1129_1395	1.44e-86	255.0	COG0197@1|root,COG0197@2|Bacteria,2IFEI@201174|Actinobacteria,4D5HT@85005|Actinomycetales	201174|Actinobacteria	J	Binds 23S rRNA and is also seen to make contacts with the A and possibly P site tRNAs	rplP	GO:0003674,GO:0003676,GO:0003723,GO:0003735,GO:0005198,GO:0005488,GO:0005575,GO:0005622,GO:0005623,GO:0005737,GO:0005829,GO:0005840,GO:0005886,GO:0008150,GO:0015934,GO:0016020,GO:0019843,GO:0022625,GO:0022626,GO:0032991,GO:0040007,GO:0043226,GO:0043228,GO:0043229,GO:0043232,GO:0044391,GO:0044422,GO:0044424,GO:0044444,GO:0044445,GO:0044446,GO:0044464,GO:0071944,GO:0097159,GO:1901363,GO:1990904	-	ko:K02878	ko03010,map03010	M00178	-	-	br01610,ko00000,ko00001,ko00002,ko03011	-	-	-	Ribosomal_L16
TP2_01380	1115803.HMPREF1129_1395	1.44e-86	255.0	COG0197@1|root,COG0197@2|Bacteria,2IFEI@201174|Actinobacteria,4D5HT@85005|Actinomycetales	201174|Actinobacteria	J	Binds 23S rRNA and is also seen to make contacts with the A and possibly P site tRNAs	rplP	GO:0003674,GO:0003676,GO:0003723,GO:0003735,GO:0005198,GO:0005488,GO:0005575,GO:0005622,GO:0005623,GO:0005737,GO:0005829,GO:0005840,GO:0005886,GO:0008150,GO:0015934,GO:0016020,GO:0019843,GO:0022625,GO:0022626,GO:0032991,GO:0040007,GO:0043226,GO:0043228,GO:0043229,GO:0043232,GO:0044391,GO:0044422,GO:0044424,GO:0044444,GO:0044445,GO:0044446,GO:0044464,GO:0071944,GO:0097159,GO:1901363,GO:1990904	-	ko:K02878	ko03010,map03010	M00178	-	-	br01610,ko00000,ko00001,ko00002,ko03011	-	-	-	Ribosomal_L16
TP3_00715	1115803.HMPREF1129_1395	1.44e-86	255.0	COG0197@1|root,COG0197@2|Bacteria,2IFEI@201174|Actinobacteria,4D5HT@85005|Actinomycetales	201174|Actinobacteria	J	Binds 23S rRNA and is also seen to make contacts with the A and possibly P site tRNAs	rplP	GO:0003674,GO:0003676,GO:0003723,GO:0003735,GO:0005198,GO:0005488,GO:0005575,GO:0005622,GO:0005623,GO:0005737,GO:0005829,GO:0005840,GO:0005886,GO:0008150,GO:0015934,GO:0016020,GO:0019843,GO:0022625,GO:0022626,GO:0032991,GO:0040007,GO:0043226,GO:0043228,GO:0043229,GO:0043232,GO:0044391,GO:0044422,GO:0044424,GO:0044444,GO:0044445,GO:0044446,GO:0044464,GO:0071944,GO:0097159,GO:1901363,GO:1990904	-	ko:K02878	ko03010,map03010	M00178	-	-	br01610,ko00000,ko00001,ko00002,ko03011	-	-	-	Ribosomal_L16
TP4_04280	1115803.HMPREF1129_1395	1.44e-86	255.0	COG0197@1|root,COG0197@2|Bacteria,2IFEI@201174|Actinobacteria,4D5HT@85005|Actinomycetales	201174|Actinobacteria	J	Binds 23S rRNA and is also seen to make contacts with the A and possibly P site tRNAs	rplP	GO:0003674,GO:0003676,GO:0003723,GO:0003735,GO:0005198,GO:0005488,GO:0005575,GO:0005622,GO:0005623,GO:0005737,GO:0005829,GO:0005840,GO:0005886,GO:0008150,GO:0015934,GO:0016020,GO:0019843,GO:0022625,GO:0022626,GO:0032991,GO:0040007,GO:0043226,GO:0043228,GO:0043229,GO:0043232,GO:0044391,GO:0044422,GO:0044424,GO:0044444,GO:0044445,GO:0044446,GO:0044464,GO:0071944,GO:0097159,GO:1901363,GO:1990904	-	ko:K02878	ko03010,map03010	M00178	-	-	br01610,ko00000,ko00001,ko00002,ko03011	-	-	-	Ribosomal_L16
TP4479_07065	1115803.HMPREF1129_1395	1.44e-86	255.0	COG0197@1|root,COG0197@2|Bacteria,2IFEI@201174|Actinobacteria,4D5HT@85005|Actinomycetales	201174|Actinobacteria	J	Binds 23S rRNA and is also seen to make contacts with the A and possibly P site tRNAs	rplP	GO:0003674,GO:0003676,GO:0003723,GO:0003735,GO:0005198,GO:0005488,GO:0005575,GO:0005622,GO:0005623,GO:0005737,GO:0005829,GO:0005840,GO:0005886,GO:0008150,GO:0015934,GO:0016020,GO:0019843,GO:0022625,GO:0022626,GO:0032991,GO:0040007,GO:0043226,GO:0043228,GO:0043229,GO:0043232,GO:0044391,GO:0044422,GO:0044424,GO:0044444,GO:0044445,GO:0044446,GO:0044464,GO:0071944,GO:0097159,GO:1901363,GO:1990904	-	ko:K02878	ko03010,map03010	M00178	-	-	br01610,ko00000,ko00001,ko00002,ko03011	-	-	-	Ribosomal_L16
TP8_03025	1115803.HMPREF1129_1395	1.44e-86	255.0	COG0197@1|root,COG0197@2|Bacteria,2IFEI@201174|Actinobacteria,4D5HT@85005|Actinomycetales	201174|Actinobacteria	J	Binds 23S rRNA and is also seen to make contacts with the A and possibly P site tRNAs	rplP	GO:0003674,GO:0003676,GO:0003723,GO:0003735,GO:0005198,GO:0005488,GO:0005575,GO:0005622,GO:0005623,GO:0005737,GO:0005829,GO:0005840,GO:0005886,GO:0008150,GO:0015934,GO:0016020,GO:0019843,GO:0022625,GO:0022626,GO:0032991,GO:0040007,GO:0043226,GO:0043228,GO:0043229,GO:0043232,GO:0044391,GO:0044422,GO:0044424,GO:0044444,GO:0044445,GO:0044446,GO:0044464,GO:0071944,GO:0097159,GO:1901363,GO:1990904	-	ko:K02878	ko03010,map03010	M00178	-	-	br01610,ko00000,ko00001,ko00002,ko03011	-	-	-	Ribosomal_L16
TP_2849_09000	1115803.HMPREF1129_1395	1.44e-86	255.0	COG0197@1|root,COG0197@2|Bacteria,2IFEI@201174|Actinobacteria,4D5HT@85005|Actinomycetales	201174|Actinobacteria	J	Binds 23S rRNA and is also seen to make contacts with the A and possibly P site tRNAs	rplP	GO:0003674,GO:0003676,GO:0003723,GO:0003735,GO:0005198,GO:0005488,GO:0005575,GO:0005622,GO:0005623,GO:0005737,GO:0005829,GO:0005840,GO:0005886,GO:0008150,GO:0015934,GO:0016020,GO:0019843,GO:0022625,GO:0022626,GO:0032991,GO:0040007,GO:0043226,GO:0043228,GO:0043229,GO:0043232,GO:0044391,GO:0044422,GO:0044424,GO:0044444,GO:0044445,GO:0044446,GO:0044464,GO:0071944,GO:0097159,GO:1901363,GO:1990904	-	ko:K02878	ko03010,map03010	M00178	-	-	br01610,ko00000,ko00001,ko00002,ko03011	-	-	-	Ribosomal_L16
UFV1_01440	1115803.HMPREF1129_1395	1.44e-86	255.0	COG0197@1|root,COG0197@2|Bacteria,2IFEI@201174|Actinobacteria,4D5HT@85005|Actinomycetales	201174|Actinobacteria	J	Binds 23S rRNA and is also seen to make contacts with the A and possibly P site tRNAs	rplP	GO:0003674,GO:0003676,GO:0003723,GO:0003735,GO:0005198,GO:0005488,GO:0005575,GO:0005622,GO:0005623,GO:0005737,GO:0005829,GO:0005840,GO:0005886,GO:0008150,GO:0015934,GO:0016020,GO:0019843,GO:0022625,GO:0022626,GO:0032991,GO:0040007,GO:0043226,GO:0043228,GO:0043229,GO:0043232,GO:0044391,GO:0044422,GO:0044424,GO:0044444,GO:0044445,GO:0044446,GO:0044464,GO:0071944,GO:0097159,GO:1901363,GO:1990904	-	ko:K02878	ko03010,map03010	M00178	-	-	br01610,ko00000,ko00001,ko00002,ko03011	-	-	-	Ribosomal_L16
jx18_05945	1115803.HMPREF1129_1395	1.44e-86	255.0	COG0197@1|root,COG0197@2|Bacteria,2IFEI@201174|Actinobacteria,4D5HT@85005|Actinomycetales	201174|Actinobacteria	J	Binds 23S rRNA and is also seen to make contacts with the A and possibly P site tRNAs	rplP	GO:0003674,GO:0003676,GO:0003723,GO:0003735,GO:0005198,GO:0005488,GO:0005575,GO:0005622,GO:0005623,GO:0005737,GO:0005829,GO:0005840,GO:0005886,GO:0008150,GO:0015934,GO:0016020,GO:0019843,GO:0022625,GO:0022626,GO:0032991,GO:0040007,GO:0043226,GO:0043228,GO:0043229,GO:0043232,GO:0044391,GO:0044422,GO:0044424,GO:0044444,GO:0044445,GO:0044446,GO:0044464,GO:0071944,GO:0097159,GO:1901363,GO:1990904	-	ko:K02878	ko03010,map03010	M00178	-	-	br01610,ko00000,ko00001,ko00002,ko03011	-	-	-	Ribosomal_L16
TP6375_05030	1227261.HMPREF0043_02326	6.85e-70	224.0	COG0483@1|root,COG0483@2|Bacteria,2GJQE@201174|Actinobacteria,4D83V@85005|Actinomycetales	201174|Actinobacteria	G	Inositol monophosphatase family	suhB	-	3.1.3.25	ko:K01092	ko00521,ko00562,ko01100,ko04070,map00521,map00562,map01100,map04070	M00131	R01185,R01186,R01187	RC00078	ko00000,ko00001,ko00002,ko01000	-	-	-	Inositol_P
2012CQ_ZSH_05485	1227261.HMPREF0043_02326	2.75e-69	223.0	COG0483@1|root,COG0483@2|Bacteria,2GJQE@201174|Actinobacteria,4D83V@85005|Actinomycetales	201174|Actinobacteria	G	Inositol monophosphatase family	suhB	-	3.1.3.25	ko:K01092	ko00521,ko00562,ko01100,ko04070,map00521,map00562,map01100,map04070	M00131	R01185,R01186,R01187	RC00078	ko00000,ko00001,ko00002,ko01000	-	-	-	Inositol_P
Arash114_05030	1227261.HMPREF0043_02326	1.21e-70	226.0	COG0483@1|root,COG0483@2|Bacteria,2GJQE@201174|Actinobacteria,4D83V@85005|Actinomycetales	201174|Actinobacteria	G	Inositol monophosphatase family	suhB	-	3.1.3.25	ko:K01092	ko00521,ko00562,ko01100,ko04070,map00521,map00562,map01100,map04070	M00131	R01185,R01186,R01187	RC00078	ko00000,ko00001,ko00002,ko01000	-	-	-	Inositol_P
Bu5_01365	1227261.HMPREF0043_02326	6.85e-70	224.0	COG0483@1|root,COG0483@2|Bacteria,2GJQE@201174|Actinobacteria,4D83V@85005|Actinomycetales	201174|Actinobacteria	G	Inositol monophosphatase family	suhB	-	3.1.3.25	ko:K01092	ko00521,ko00562,ko01100,ko04070,map00521,map00562,map01100,map04070	M00131	R01185,R01186,R01187	RC00078	ko00000,ko00001,ko00002,ko01000	-	-	-	Inositol_P
DSM_20630_00070	1227261.HMPREF0043_02326	3.88e-69	223.0	COG0483@1|root,COG0483@2|Bacteria,2GJQE@201174|Actinobacteria,4D83V@85005|Actinomycetales	201174|Actinobacteria	G	Inositol monophosphatase family	suhB	-	3.1.3.25	ko:K01092	ko00521,ko00562,ko01100,ko04070,map00521,map00562,map01100,map04070	M00131	R01185,R01186,R01187	RC00078	ko00000,ko00001,ko00002,ko01000	-	-	-	Inositol_P
MS249_09140	1227261.HMPREF0043_02326	4.84e-70	225.0	COG0483@1|root,COG0483@2|Bacteria,2GJQE@201174|Actinobacteria,4D83V@85005|Actinomycetales	201174|Actinobacteria	G	Inositol monophosphatase family	suhB	-	3.1.3.25	ko:K01092	ko00521,ko00562,ko01100,ko04070,map00521,map00562,map01100,map04070	M00131	R01185,R01186,R01187	RC00078	ko00000,ko00001,ko00002,ko01000	-	-	-	Inositol_P
NCTC5224_02470	1227261.HMPREF0043_02326	3.88e-69	223.0	COG0483@1|root,COG0483@2|Bacteria,2GJQE@201174|Actinobacteria,4D83V@85005|Actinomycetales	201174|Actinobacteria	G	Inositol monophosphatase family	suhB	-	3.1.3.25	ko:K01092	ko00521,ko00562,ko01100,ko04070,map00521,map00562,map01100,map04070	M00131	R01185,R01186,R01187	RC00078	ko00000,ko00001,ko00002,ko01000	-	-	-	Inositol_P
SH01_01345	1227261.HMPREF0043_02326	3.88e-69	223.0	COG0483@1|root,COG0483@2|Bacteria,2GJQE@201174|Actinobacteria,4D83V@85005|Actinomycetales	201174|Actinobacteria	G	Inositol monophosphatase family	suhB	-	3.1.3.25	ko:K01092	ko00521,ko00562,ko01100,ko04070,map00521,map00562,map01100,map04070	M00131	R01185,R01186,R01187	RC00078	ko00000,ko00001,ko00002,ko01000	-	-	-	Inositol_P
SH02_00465	1227261.HMPREF0043_02326	3.88e-69	223.0	COG0483@1|root,COG0483@2|Bacteria,2GJQE@201174|Actinobacteria,4D83V@85005|Actinomycetales	201174|Actinobacteria	G	Inositol monophosphatase family	suhB	-	3.1.3.25	ko:K01092	ko00521,ko00562,ko01100,ko04070,map00521,map00562,map01100,map04070	M00131	R01185,R01186,R01187	RC00078	ko00000,ko00001,ko00002,ko01000	-	-	-	Inositol_P
SH03_07435	1227261.HMPREF0043_02326	3.88e-69	223.0	COG0483@1|root,COG0483@2|Bacteria,2GJQE@201174|Actinobacteria,4D83V@85005|Actinomycetales	201174|Actinobacteria	G	Inositol monophosphatase family	suhB	-	3.1.3.25	ko:K01092	ko00521,ko00562,ko01100,ko04070,map00521,map00562,map01100,map04070	M00131	R01185,R01186,R01187	RC00078	ko00000,ko00001,ko00002,ko01000	-	-	-	Inositol_P
TP1_06085	1227261.HMPREF0043_02326	2.42e-70	226.0	COG0483@1|root,COG0483@2|Bacteria,2GJQE@201174|Actinobacteria,4D83V@85005|Actinomycetales	201174|Actinobacteria	G	Inositol monophosphatase family	suhB	-	3.1.3.25	ko:K01092	ko00521,ko00562,ko01100,ko04070,map00521,map00562,map01100,map04070	M00131	R01185,R01186,R01187	RC00078	ko00000,ko00001,ko00002,ko01000	-	-	-	Inositol_P
TP2_01665	1227261.HMPREF0043_02326	2.42e-70	226.0	COG0483@1|root,COG0483@2|Bacteria,2GJQE@201174|Actinobacteria,4D83V@85005|Actinomycetales	201174|Actinobacteria	G	Inositol monophosphatase family	suhB	-	3.1.3.25	ko:K01092	ko00521,ko00562,ko01100,ko04070,map00521,map00562,map01100,map04070	M00131	R01185,R01186,R01187	RC00078	ko00000,ko00001,ko00002,ko01000	-	-	-	Inositol_P
TP3_00435	1227261.HMPREF0043_02326	3.42e-70	225.0	COG0483@1|root,COG0483@2|Bacteria,2GJQE@201174|Actinobacteria,4D83V@85005|Actinomycetales	201174|Actinobacteria	G	Inositol monophosphatase family	suhB	-	3.1.3.25	ko:K01092	ko00521,ko00562,ko01100,ko04070,map00521,map00562,map01100,map04070	M00131	R01185,R01186,R01187	RC00078	ko00000,ko00001,ko00002,ko01000	-	-	-	Inositol_P
TP4_04560	1227261.HMPREF0043_02326	3.88e-69	223.0	COG0483@1|root,COG0483@2|Bacteria,2GJQE@201174|Actinobacteria,4D83V@85005|Actinomycetales	201174|Actinobacteria	G	Inositol monophosphatase family	suhB	-	3.1.3.25	ko:K01092	ko00521,ko00562,ko01100,ko04070,map00521,map00562,map01100,map04070	M00131	R01185,R01186,R01187	RC00078	ko00000,ko00001,ko00002,ko01000	-	-	-	Inositol_P
TP4479_06785	1227261.HMPREF0043_02326	3.42e-70	225.0	COG0483@1|root,COG0483@2|Bacteria,2GJQE@201174|Actinobacteria,4D83V@85005|Actinomycetales	201174|Actinobacteria	G	Inositol monophosphatase family	suhB	-	3.1.3.25	ko:K01092	ko00521,ko00562,ko01100,ko04070,map00521,map00562,map01100,map04070	M00131	R01185,R01186,R01187	RC00078	ko00000,ko00001,ko00002,ko01000	-	-	-	Inositol_P
TP8_02715	1227261.HMPREF0043_02326	6.85e-70	224.0	COG0483@1|root,COG0483@2|Bacteria,2GJQE@201174|Actinobacteria,4D83V@85005|Actinomycetales	201174|Actinobacteria	G	Inositol monophosphatase family	suhB	-	3.1.3.25	ko:K01092	ko00521,ko00562,ko01100,ko04070,map00521,map00562,map01100,map04070	M00131	R01185,R01186,R01187	RC00078	ko00000,ko00001,ko00002,ko01000	-	-	-	Inositol_P
TP_2849_08720	1227261.HMPREF0043_02326	3.42e-70	225.0	COG0483@1|root,COG0483@2|Bacteria,2GJQE@201174|Actinobacteria,4D83V@85005|Actinomycetales	201174|Actinobacteria	G	Inositol monophosphatase family	suhB	-	3.1.3.25	ko:K01092	ko00521,ko00562,ko01100,ko04070,map00521,map00562,map01100,map04070	M00131	R01185,R01186,R01187	RC00078	ko00000,ko00001,ko00002,ko01000	-	-	-	Inositol_P
UFV1_00950	1227261.HMPREF0043_02326	6.85e-70	224.0	COG0483@1|root,COG0483@2|Bacteria,2GJQE@201174|Actinobacteria,4D83V@85005|Actinomycetales	201174|Actinobacteria	G	Inositol monophosphatase family	suhB	-	3.1.3.25	ko:K01092	ko00521,ko00562,ko01100,ko04070,map00521,map00562,map01100,map04070	M00131	R01185,R01186,R01187	RC00078	ko00000,ko00001,ko00002,ko01000	-	-	-	Inositol_P
jx18_06230	1227261.HMPREF0043_02326	3.88e-69	223.0	COG0483@1|root,COG0483@2|Bacteria,2GJQE@201174|Actinobacteria,4D83V@85005|Actinomycetales	201174|Actinobacteria	G	Inositol monophosphatase family	suhB	-	3.1.3.25	ko:K01092	ko00521,ko00562,ko01100,ko04070,map00521,map00562,map01100,map04070	M00131	R01185,R01186,R01187	RC00078	ko00000,ko00001,ko00002,ko01000	-	-	-	Inositol_P
TP6375_05165	1219585.HMPREF1631_03615	1.32e-195	547.0	COG1088@1|root,COG1088@2|Bacteria,2GNDU@201174|Actinobacteria,4D38F@85005|Actinomycetales	201174|Actinobacteria	M	Belongs to the NAD(P)-dependent epimerase dehydratase family. dTDP-glucose dehydratase subfamily	rfbB	-	4.2.1.46	ko:K01710	ko00521,ko00523,ko00525,ko01055,ko01130,map00521,map00523,map00525,map01055,map01130	M00793	R06513	RC00402	ko00000,ko00001,ko00002,ko01000	-	-	-	GDP_Man_Dehyd
2012CQ_ZSH_05350	1219585.HMPREF1631_03615	5.36e-195	545.0	COG1088@1|root,COG1088@2|Bacteria,2GNDU@201174|Actinobacteria,4D38F@85005|Actinomycetales	201174|Actinobacteria	M	Belongs to the NAD(P)-dependent epimerase dehydratase family. dTDP-glucose dehydratase subfamily	rfbB	-	4.2.1.46	ko:K01710	ko00521,ko00523,ko00525,ko01055,ko01130,map00521,map00523,map00525,map01055,map01130	M00793	R06513	RC00402	ko00000,ko00001,ko00002,ko01000	-	-	-	GDP_Man_Dehyd
Arash114_05165	1219585.HMPREF1631_03615	2.28e-196	549.0	COG1088@1|root,COG1088@2|Bacteria,2GNDU@201174|Actinobacteria,4D38F@85005|Actinomycetales	201174|Actinobacteria	M	Belongs to the NAD(P)-dependent epimerase dehydratase family. dTDP-glucose dehydratase subfamily	rfbB	-	4.2.1.46	ko:K01710	ko00521,ko00523,ko00525,ko01055,ko01130,map00521,map00523,map00525,map01055,map01130	M00793	R06513	RC00402	ko00000,ko00001,ko00002,ko01000	-	-	-	GDP_Man_Dehyd
Bu5_01230	1219585.HMPREF1631_03615	1.08e-194	545.0	COG1088@1|root,COG1088@2|Bacteria,2GNDU@201174|Actinobacteria,4D38F@85005|Actinomycetales	201174|Actinobacteria	M	Belongs to the NAD(P)-dependent epimerase dehydratase family. dTDP-glucose dehydratase subfamily	rfbB	-	4.2.1.46	ko:K01710	ko00521,ko00523,ko00525,ko01055,ko01130,map00521,map00523,map00525,map01055,map01130	M00793	R06513	RC00402	ko00000,ko00001,ko00002,ko01000	-	-	-	GDP_Man_Dehyd
DSM_20630_09205	1219585.HMPREF1631_03615	5.36e-195	545.0	COG1088@1|root,COG1088@2|Bacteria,2GNDU@201174|Actinobacteria,4D38F@85005|Actinomycetales	201174|Actinobacteria	M	Belongs to the NAD(P)-dependent epimerase dehydratase family. dTDP-glucose dehydratase subfamily	rfbB	-	4.2.1.46	ko:K01710	ko00521,ko00523,ko00525,ko01055,ko01130,map00521,map00523,map00525,map01055,map01130	M00793	R06513	RC00402	ko00000,ko00001,ko00002,ko01000	-	-	-	GDP_Man_Dehyd
MS249_09325	1219585.HMPREF1631_03615	1.32e-195	547.0	COG1088@1|root,COG1088@2|Bacteria,2GNDU@201174|Actinobacteria,4D38F@85005|Actinomycetales	201174|Actinobacteria	M	Belongs to the NAD(P)-dependent epimerase dehydratase family. dTDP-glucose dehydratase subfamily	rfbB	-	4.2.1.46	ko:K01710	ko00521,ko00523,ko00525,ko01055,ko01130,map00521,map00523,map00525,map01055,map01130	M00793	R06513	RC00402	ko00000,ko00001,ko00002,ko01000	-	-	-	GDP_Man_Dehyd
NCTC5224_02335	1219585.HMPREF1631_03615	5.36e-195	545.0	COG1088@1|root,COG1088@2|Bacteria,2GNDU@201174|Actinobacteria,4D38F@85005|Actinomycetales	201174|Actinobacteria	M	Belongs to the NAD(P)-dependent epimerase dehydratase family. dTDP-glucose dehydratase subfamily	rfbB	-	4.2.1.46	ko:K01710	ko00521,ko00523,ko00525,ko01055,ko01130,map00521,map00523,map00525,map01055,map01130	M00793	R06513	RC00402	ko00000,ko00001,ko00002,ko01000	-	-	-	GDP_Man_Dehyd
SH01_01210	1219585.HMPREF1631_03615	5.36e-195	545.0	COG1088@1|root,COG1088@2|Bacteria,2GNDU@201174|Actinobacteria,4D38F@85005|Actinomycetales	201174|Actinobacteria	M	Belongs to the NAD(P)-dependent epimerase dehydratase family. dTDP-glucose dehydratase subfamily	rfbB	-	4.2.1.46	ko:K01710	ko00521,ko00523,ko00525,ko01055,ko01130,map00521,map00523,map00525,map01055,map01130	M00793	R06513	RC00402	ko00000,ko00001,ko00002,ko01000	-	-	-	GDP_Man_Dehyd
SH02_00600	1219585.HMPREF1631_03615	5.36e-195	545.0	COG1088@1|root,COG1088@2|Bacteria,2GNDU@201174|Actinobacteria,4D38F@85005|Actinomycetales	201174|Actinobacteria	M	Belongs to the NAD(P)-dependent epimerase dehydratase family. dTDP-glucose dehydratase subfamily	rfbB	-	4.2.1.46	ko:K01710	ko00521,ko00523,ko00525,ko01055,ko01130,map00521,map00523,map00525,map01055,map01130	M00793	R06513	RC00402	ko00000,ko00001,ko00002,ko01000	-	-	-	GDP_Man_Dehyd
SH03_07570	1219585.HMPREF1631_03615	5.36e-195	545.0	COG1088@1|root,COG1088@2|Bacteria,2GNDU@201174|Actinobacteria,4D38F@85005|Actinomycetales	201174|Actinobacteria	M	Belongs to the NAD(P)-dependent epimerase dehydratase family. dTDP-glucose dehydratase subfamily	rfbB	-	4.2.1.46	ko:K01710	ko00521,ko00523,ko00525,ko01055,ko01130,map00521,map00523,map00525,map01055,map01130	M00793	R06513	RC00402	ko00000,ko00001,ko00002,ko01000	-	-	-	GDP_Man_Dehyd
TP1_06220	1219585.HMPREF1631_03615	1.32e-195	547.0	COG1088@1|root,COG1088@2|Bacteria,2GNDU@201174|Actinobacteria,4D38F@85005|Actinomycetales	201174|Actinobacteria	M	Belongs to the NAD(P)-dependent epimerase dehydratase family. dTDP-glucose dehydratase subfamily	rfbB	-	4.2.1.46	ko:K01710	ko00521,ko00523,ko00525,ko01055,ko01130,map00521,map00523,map00525,map01055,map01130	M00793	R06513	RC00402	ko00000,ko00001,ko00002,ko01000	-	-	-	GDP_Man_Dehyd
TP2_01800	1219585.HMPREF1631_03615	1.32e-195	547.0	COG1088@1|root,COG1088@2|Bacteria,2GNDU@201174|Actinobacteria,4D38F@85005|Actinomycetales	201174|Actinobacteria	M	Belongs to the NAD(P)-dependent epimerase dehydratase family. dTDP-glucose dehydratase subfamily	rfbB	-	4.2.1.46	ko:K01710	ko00521,ko00523,ko00525,ko01055,ko01130,map00521,map00523,map00525,map01055,map01130	M00793	R06513	RC00402	ko00000,ko00001,ko00002,ko01000	-	-	-	GDP_Man_Dehyd
TP3_00300	1219585.HMPREF1631_03615	5.36e-195	545.0	COG1088@1|root,COG1088@2|Bacteria,2GNDU@201174|Actinobacteria,4D38F@85005|Actinomycetales	201174|Actinobacteria	M	Belongs to the NAD(P)-dependent epimerase dehydratase family. dTDP-glucose dehydratase subfamily	rfbB	-	4.2.1.46	ko:K01710	ko00521,ko00523,ko00525,ko01055,ko01130,map00521,map00523,map00525,map01055,map01130	M00793	R06513	RC00402	ko00000,ko00001,ko00002,ko01000	-	-	-	GDP_Man_Dehyd
TP4_04695	1219585.HMPREF1631_03615	5.36e-195	545.0	COG1088@1|root,COG1088@2|Bacteria,2GNDU@201174|Actinobacteria,4D38F@85005|Actinomycetales	201174|Actinobacteria	M	Belongs to the NAD(P)-dependent epimerase dehydratase family. dTDP-glucose dehydratase subfamily	rfbB	-	4.2.1.46	ko:K01710	ko00521,ko00523,ko00525,ko01055,ko01130,map00521,map00523,map00525,map01055,map01130	M00793	R06513	RC00402	ko00000,ko00001,ko00002,ko01000	-	-	-	GDP_Man_Dehyd
TP4479_06650	1219585.HMPREF1631_03615	5.36e-195	545.0	COG1088@1|root,COG1088@2|Bacteria,2GNDU@201174|Actinobacteria,4D38F@85005|Actinomycetales	201174|Actinobacteria	M	Belongs to the NAD(P)-dependent epimerase dehydratase family. dTDP-glucose dehydratase subfamily	rfbB	-	4.2.1.46	ko:K01710	ko00521,ko00523,ko00525,ko01055,ko01130,map00521,map00523,map00525,map01055,map01130	M00793	R06513	RC00402	ko00000,ko00001,ko00002,ko01000	-	-	-	GDP_Man_Dehyd
TP8_02580	1219585.HMPREF1631_03615	5.36e-195	545.0	COG1088@1|root,COG1088@2|Bacteria,2GNDU@201174|Actinobacteria,4D38F@85005|Actinomycetales	201174|Actinobacteria	M	Belongs to the NAD(P)-dependent epimerase dehydratase family. dTDP-glucose dehydratase subfamily	rfbB	-	4.2.1.46	ko:K01710	ko00521,ko00523,ko00525,ko01055,ko01130,map00521,map00523,map00525,map01055,map01130	M00793	R06513	RC00402	ko00000,ko00001,ko00002,ko01000	-	-	-	GDP_Man_Dehyd
TP_2849_08585	1219585.HMPREF1631_03615	5.36e-195	545.0	COG1088@1|root,COG1088@2|Bacteria,2GNDU@201174|Actinobacteria,4D38F@85005|Actinomycetales	201174|Actinobacteria	M	Belongs to the NAD(P)-dependent epimerase dehydratase family. dTDP-glucose dehydratase subfamily	rfbB	-	4.2.1.46	ko:K01710	ko00521,ko00523,ko00525,ko01055,ko01130,map00521,map00523,map00525,map01055,map01130	M00793	R06513	RC00402	ko00000,ko00001,ko00002,ko01000	-	-	-	GDP_Man_Dehyd
UFV1_01085	1219585.HMPREF1631_03615	1.32e-195	547.0	COG1088@1|root,COG1088@2|Bacteria,2GNDU@201174|Actinobacteria,4D38F@85005|Actinomycetales	201174|Actinobacteria	M	Belongs to the NAD(P)-dependent epimerase dehydratase family. dTDP-glucose dehydratase subfamily	rfbB	-	4.2.1.46	ko:K01710	ko00521,ko00523,ko00525,ko01055,ko01130,map00521,map00523,map00525,map01055,map01130	M00793	R06513	RC00402	ko00000,ko00001,ko00002,ko01000	-	-	-	GDP_Man_Dehyd
jx18_06365	1219585.HMPREF1631_03615	5.36e-195	545.0	COG1088@1|root,COG1088@2|Bacteria,2GNDU@201174|Actinobacteria,4D38F@85005|Actinomycetales	201174|Actinobacteria	M	Belongs to the NAD(P)-dependent epimerase dehydratase family. dTDP-glucose dehydratase subfamily	rfbB	-	4.2.1.46	ko:K01710	ko00521,ko00523,ko00525,ko01055,ko01130,map00521,map00523,map00525,map01055,map01130	M00793	R06513	RC00402	ko00000,ko00001,ko00002,ko01000	-	-	-	GDP_Man_Dehyd
TP6375_07815	1227261.HMPREF0043_01574	1.16e-108	323.0	COG0395@1|root,COG0395@2|Bacteria,2GP5D@201174|Actinobacteria,4D3SU@85005|Actinomycetales	201174|Actinobacteria	P	ABC transporter permease	uspB	-	-	ko:K02026	-	M00207	-	-	ko00000,ko00002,ko02000	3.A.1.1	-	-	BPD_transp_1
2012CQ_ZSH_02730	649743.HMPREF0972_00330	1.18e-109	326.0	COG0395@1|root,COG0395@2|Bacteria,2GP5D@201174|Actinobacteria,4D3SU@85005|Actinomycetales	201174|Actinobacteria	P	ABC transporter permease	uspB	-	-	ko:K02026	-	M00207	-	-	ko00000,ko00002,ko02000	3.A.1.1	-	-	BPD_transp_1
Arash114_07845	649743.HMPREF0972_00330	1.18e-109	326.0	COG0395@1|root,COG0395@2|Bacteria,2GP5D@201174|Actinobacteria,4D3SU@85005|Actinomycetales	201174|Actinobacteria	P	ABC transporter permease	uspB	-	-	ko:K02026	-	M00207	-	-	ko00000,ko00002,ko02000	3.A.1.1	-	-	BPD_transp_1
Bu5_07405	649743.HMPREF0972_00330	2.05e-110	328.0	COG0395@1|root,COG0395@2|Bacteria,2GP5D@201174|Actinobacteria,4D3SU@85005|Actinomycetales	201174|Actinobacteria	P	ABC transporter permease	uspB	-	-	ko:K02026	-	M00207	-	-	ko00000,ko00002,ko02000	3.A.1.1	-	-	BPD_transp_1
DSM_20630_10015	649743.HMPREF0972_00330	2.37e-109	325.0	COG0395@1|root,COG0395@2|Bacteria,2GP5D@201174|Actinobacteria,4D3SU@85005|Actinomycetales	201174|Actinobacteria	P	ABC transporter permease	uspB	-	-	ko:K02026	-	M00207	-	-	ko00000,ko00002,ko02000	3.A.1.1	-	-	BPD_transp_1
MS249_00975	649743.HMPREF0972_00330	1.18e-109	326.0	COG0395@1|root,COG0395@2|Bacteria,2GP5D@201174|Actinobacteria,4D3SU@85005|Actinomycetales	201174|Actinobacteria	P	ABC transporter permease	uspB	-	-	ko:K02026	-	M00207	-	-	ko00000,ko00002,ko02000	3.A.1.1	-	-	BPD_transp_1
NCTC5224_10030	649743.HMPREF0972_00330	2.37e-109	325.0	COG0395@1|root,COG0395@2|Bacteria,2GP5D@201174|Actinobacteria,4D3SU@85005|Actinomycetales	201174|Actinobacteria	P	ABC transporter permease	uspB	-	-	ko:K02026	-	M00207	-	-	ko00000,ko00002,ko02000	3.A.1.1	-	-	BPD_transp_1
SH01_06040	1227261.HMPREF0043_01574	1e-109	326.0	COG0395@1|root,COG0395@2|Bacteria,2GP5D@201174|Actinobacteria,4D3SU@85005|Actinomycetales	201174|Actinobacteria	P	ABC transporter permease	uspB	-	-	ko:K02026	-	M00207	-	-	ko00000,ko00002,ko02000	3.A.1.1	-	-	BPD_transp_1
SH02_07660	1227261.HMPREF0043_01574	5.77e-109	324.0	COG0395@1|root,COG0395@2|Bacteria,2GP5D@201174|Actinobacteria,4D3SU@85005|Actinomycetales	201174|Actinobacteria	P	ABC transporter permease	uspB	-	-	ko:K02026	-	M00207	-	-	ko00000,ko00002,ko02000	3.A.1.1	-	-	BPD_transp_1
SH03_03375	1227261.HMPREF0043_01574	5.77e-109	324.0	COG0395@1|root,COG0395@2|Bacteria,2GP5D@201174|Actinobacteria,4D3SU@85005|Actinomycetales	201174|Actinobacteria	P	ABC transporter permease	uspB	-	-	ko:K02026	-	M00207	-	-	ko00000,ko00002,ko02000	3.A.1.1	-	-	BPD_transp_1
TP1_08835	1227261.HMPREF0043_01574	1e-109	326.0	COG0395@1|root,COG0395@2|Bacteria,2GP5D@201174|Actinobacteria,4D3SU@85005|Actinomycetales	201174|Actinobacteria	P	ABC transporter permease	uspB	-	-	ko:K02026	-	M00207	-	-	ko00000,ko00002,ko02000	3.A.1.1	-	-	BPD_transp_1
TP2_04495	649743.HMPREF0972_00330	6.76e-109	324.0	COG0395@1|root,COG0395@2|Bacteria,2GP5D@201174|Actinobacteria,4D3SU@85005|Actinomycetales	201174|Actinobacteria	P	ABC transporter permease	uspB	-	-	ko:K02026	-	M00207	-	-	ko00000,ko00002,ko02000	3.A.1.1	-	-	BPD_transp_1
TP3_08570	1227261.HMPREF0043_01574	1e-109	326.0	COG0395@1|root,COG0395@2|Bacteria,2GP5D@201174|Actinobacteria,4D3SU@85005|Actinomycetales	201174|Actinobacteria	P	ABC transporter permease	uspB	-	-	ko:K02026	-	M00207	-	-	ko00000,ko00002,ko02000	3.A.1.1	-	-	BPD_transp_1
TP4_07270	1227261.HMPREF0043_01574	5.77e-109	324.0	COG0395@1|root,COG0395@2|Bacteria,2GP5D@201174|Actinobacteria,4D3SU@85005|Actinomycetales	201174|Actinobacteria	P	ABC transporter permease	uspB	-	-	ko:K02026	-	M00207	-	-	ko00000,ko00002,ko02000	3.A.1.1	-	-	BPD_transp_1
TP4479_04050	1227261.HMPREF0043_01574	1e-109	326.0	COG0395@1|root,COG0395@2|Bacteria,2GP5D@201174|Actinobacteria,4D3SU@85005|Actinomycetales	201174|Actinobacteria	P	ABC transporter permease	uspB	-	-	ko:K02026	-	M00207	-	-	ko00000,ko00002,ko02000	3.A.1.1	-	-	BPD_transp_1
TP8_10475	649743.HMPREF0972_00330	1.18e-109	326.0	COG0395@1|root,COG0395@2|Bacteria,2GP5D@201174|Actinobacteria,4D3SU@85005|Actinomycetales	201174|Actinobacteria	P	ABC transporter permease	uspB	-	-	ko:K02026	-	M00207	-	-	ko00000,ko00002,ko02000	3.A.1.1	-	-	BPD_transp_1
TP_2849_05985	1227261.HMPREF0043_01574	1e-109	326.0	COG0395@1|root,COG0395@2|Bacteria,2GP5D@201174|Actinobacteria,4D3SU@85005|Actinomycetales	201174|Actinobacteria	P	ABC transporter permease	uspB	-	-	ko:K02026	-	M00207	-	-	ko00000,ko00002,ko02000	3.A.1.1	-	-	BPD_transp_1
UFV1_07230	1227261.HMPREF0043_01574	1.16e-108	323.0	COG0395@1|root,COG0395@2|Bacteria,2GP5D@201174|Actinobacteria,4D3SU@85005|Actinomycetales	201174|Actinobacteria	P	ABC transporter permease	uspB	-	-	ko:K02026	-	M00207	-	-	ko00000,ko00002,ko02000	3.A.1.1	-	-	BPD_transp_1
jx18_09200	1227261.HMPREF0043_01574	5.77e-109	324.0	COG0395@1|root,COG0395@2|Bacteria,2GP5D@201174|Actinobacteria,4D3SU@85005|Actinomycetales	201174|Actinobacteria	P	ABC transporter permease	uspB	-	-	ko:K02026	-	M00207	-	-	ko00000,ko00002,ko02000	3.A.1.1	-	-	BPD_transp_1
TP6375_04810	644284.Arch_1392	6.04e-92	270.0	COG0049@1|root,COG0049@2|Bacteria,2GMVW@201174|Actinobacteria,4D4K3@85005|Actinomycetales	201174|Actinobacteria	J	One of the primary rRNA binding proteins, it binds directly to 16S rRNA where it nucleates assembly of the head domain of the 30S subunit. Is located at the subunit interface close to the decoding center, probably blocks exit of the E-site tRNA	rpsG	GO:0000028,GO:0003674,GO:0003676,GO:0003723,GO:0003729,GO:0003735,GO:0005198,GO:0005488,GO:0005575,GO:0005618,GO:0005622,GO:0005623,GO:0005737,GO:0005829,GO:0005840,GO:0005886,GO:0006412,GO:0006518,GO:0006807,GO:0006996,GO:0008150,GO:0008152,GO:0009058,GO:0009059,GO:0009987,GO:0010467,GO:0015935,GO:0016020,GO:0016043,GO:0019538,GO:0019843,GO:0022607,GO:0022613,GO:0022618,GO:0022626,GO:0022627,GO:…	-	ko:K02992	ko03010,map03010	M00178,M00179	-	-	br01610,ko00000,ko00001,ko00002,ko03011	-	-	-	Ribosomal_S7
2012CQ_ZSH_05710	644284.Arch_1392	6.04e-92	270.0	COG0049@1|root,COG0049@2|Bacteria,2GMVW@201174|Actinobacteria,4D4K3@85005|Actinomycetales	201174|Actinobacteria	J	One of the primary rRNA binding proteins, it binds directly to 16S rRNA where it nucleates assembly of the head domain of the 30S subunit. Is located at the subunit interface close to the decoding center, probably blocks exit of the E-site tRNA	rpsG	GO:0000028,GO:0003674,GO:0003676,GO:0003723,GO:0003729,GO:0003735,GO:0005198,GO:0005488,GO:0005575,GO:0005618,GO:0005622,GO:0005623,GO:0005737,GO:0005829,GO:0005840,GO:0005886,GO:0006412,GO:0006518,GO:0006807,GO:0006996,GO:0008150,GO:0008152,GO:0009058,GO:0009059,GO:0009987,GO:0010467,GO:0015935,GO:0016020,GO:0016043,GO:0019538,GO:0019843,GO:0022607,GO:0022613,GO:0022618,GO:0022626,GO:0022627,GO:…	-	ko:K02992	ko03010,map03010	M00178,M00179	-	-	br01610,ko00000,ko00001,ko00002,ko03011	-	-	-	Ribosomal_S7
Arash114_04810	644284.Arch_1392	6.04e-92	270.0	COG0049@1|root,COG0049@2|Bacteria,2GMVW@201174|Actinobacteria,4D4K3@85005|Actinomycetales	201174|Actinobacteria	J	One of the primary rRNA binding proteins, it binds directly to 16S rRNA where it nucleates assembly of the head domain of the 30S subunit. Is located at the subunit interface close to the decoding center, probably blocks exit of the E-site tRNA	rpsG	GO:0000028,GO:0003674,GO:0003676,GO:0003723,GO:0003729,GO:0003735,GO:0005198,GO:0005488,GO:0005575,GO:0005618,GO:0005622,GO:0005623,GO:0005737,GO:0005829,GO:0005840,GO:0005886,GO:0006412,GO:0006518,GO:0006807,GO:0006996,GO:0008150,GO:0008152,GO:0009058,GO:0009059,GO:0009987,GO:0010467,GO:0015935,GO:0016020,GO:0016043,GO:0019538,GO:0019843,GO:0022607,GO:0022613,GO:0022618,GO:0022626,GO:0022627,GO:…	-	ko:K02992	ko03010,map03010	M00178,M00179	-	-	br01610,ko00000,ko00001,ko00002,ko03011	-	-	-	Ribosomal_S7
Bu5_01580	644284.Arch_1392	6.04e-92	270.0	COG0049@1|root,COG0049@2|Bacteria,2GMVW@201174|Actinobacteria,4D4K3@85005|Actinomycetales	201174|Actinobacteria	J	One of the primary rRNA binding proteins, it binds directly to 16S rRNA where it nucleates assembly of the head domain of the 30S subunit. Is located at the subunit interface close to the decoding center, probably blocks exit of the E-site tRNA	rpsG	GO:0000028,GO:0003674,GO:0003676,GO:0003723,GO:0003729,GO:0003735,GO:0005198,GO:0005488,GO:0005575,GO:0005618,GO:0005622,GO:0005623,GO:0005737,GO:0005829,GO:0005840,GO:0005886,GO:0006412,GO:0006518,GO:0006807,GO:0006996,GO:0008150,GO:0008152,GO:0009058,GO:0009059,GO:0009987,GO:0010467,GO:0015935,GO:0016020,GO:0016043,GO:0019538,GO:0019843,GO:0022607,GO:0022613,GO:0022618,GO:0022626,GO:0022627,GO:…	-	ko:K02992	ko03010,map03010	M00178,M00179	-	-	br01610,ko00000,ko00001,ko00002,ko03011	-	-	-	Ribosomal_S7
DSM_20630_00300	644284.Arch_1392	6.04e-92	270.0	COG0049@1|root,COG0049@2|Bacteria,2GMVW@201174|Actinobacteria,4D4K3@85005|Actinomycetales	201174|Actinobacteria	J	One of the primary rRNA binding proteins, it binds directly to 16S rRNA where it nucleates assembly of the head domain of the 30S subunit. Is located at the subunit interface close to the decoding center, probably blocks exit of the E-site tRNA	rpsG	GO:0000028,GO:0003674,GO:0003676,GO:0003723,GO:0003729,GO:0003735,GO:0005198,GO:0005488,GO:0005575,GO:0005618,GO:0005622,GO:0005623,GO:0005737,GO:0005829,GO:0005840,GO:0005886,GO:0006412,GO:0006518,GO:0006807,GO:0006996,GO:0008150,GO:0008152,GO:0009058,GO:0009059,GO:0009987,GO:0010467,GO:0015935,GO:0016020,GO:0016043,GO:0019538,GO:0019843,GO:0022607,GO:0022613,GO:0022618,GO:0022626,GO:0022627,GO:…	-	ko:K02992	ko03010,map03010	M00178,M00179	-	-	br01610,ko00000,ko00001,ko00002,ko03011	-	-	-	Ribosomal_S7
MS249_01985	644284.Arch_1392	6.04e-92	270.0	COG0049@1|root,COG0049@2|Bacteria,2GMVW@201174|Actinobacteria,4D4K3@85005|Actinomycetales	201174|Actinobacteria	J	One of the primary rRNA binding proteins, it binds directly to 16S rRNA where it nucleates assembly of the head domain of the 30S subunit. Is located at the subunit interface close to the decoding center, probably blocks exit of the E-site tRNA	rpsG	GO:0000028,GO:0003674,GO:0003676,GO:0003723,GO:0003729,GO:0003735,GO:0005198,GO:0005488,GO:0005575,GO:0005618,GO:0005622,GO:0005623,GO:0005737,GO:0005829,GO:0005840,GO:0005886,GO:0006412,GO:0006518,GO:0006807,GO:0006996,GO:0008150,GO:0008152,GO:0009058,GO:0009059,GO:0009987,GO:0010467,GO:0015935,GO:0016020,GO:0016043,GO:0019538,GO:0019843,GO:0022607,GO:0022613,GO:0022618,GO:0022626,GO:0022627,GO:…	-	ko:K02992	ko03010,map03010	M00178,M00179	-	-	br01610,ko00000,ko00001,ko00002,ko03011	-	-	-	Ribosomal_S7
NCTC5224_02700	644284.Arch_1392	6.04e-92	270.0	COG0049@1|root,COG0049@2|Bacteria,2GMVW@201174|Actinobacteria,4D4K3@85005|Actinomycetales	201174|Actinobacteria	J	One of the primary rRNA binding proteins, it binds directly to 16S rRNA where it nucleates assembly of the head domain of the 30S subunit. Is located at the subunit interface close to the decoding center, probably blocks exit of the E-site tRNA	rpsG	GO:0000028,GO:0003674,GO:0003676,GO:0003723,GO:0003729,GO:0003735,GO:0005198,GO:0005488,GO:0005575,GO:0005618,GO:0005622,GO:0005623,GO:0005737,GO:0005829,GO:0005840,GO:0005886,GO:0006412,GO:0006518,GO:0006807,GO:0006996,GO:0008150,GO:0008152,GO:0009058,GO:0009059,GO:0009987,GO:0010467,GO:0015935,GO:0016020,GO:0016043,GO:0019538,GO:0019843,GO:0022607,GO:0022613,GO:0022618,GO:0022626,GO:0022627,GO:…	-	ko:K02992	ko03010,map03010	M00178,M00179	-	-	br01610,ko00000,ko00001,ko00002,ko03011	-	-	-	Ribosomal_S7
SH01_01560	644284.Arch_1392	6.04e-92	270.0	COG0049@1|root,COG0049@2|Bacteria,2GMVW@201174|Actinobacteria,4D4K3@85005|Actinomycetales	201174|Actinobacteria	J	One of the primary rRNA binding proteins, it binds directly to 16S rRNA where it nucleates assembly of the head domain of the 30S subunit. Is located at the subunit interface close to the decoding center, probably blocks exit of the E-site tRNA	rpsG	GO:0000028,GO:0003674,GO:0003676,GO:0003723,GO:0003729,GO:0003735,GO:0005198,GO:0005488,GO:0005575,GO:0005618,GO:0005622,GO:0005623,GO:0005737,GO:0005829,GO:0005840,GO:0005886,GO:0006412,GO:0006518,GO:0006807,GO:0006996,GO:0008150,GO:0008152,GO:0009058,GO:0009059,GO:0009987,GO:0010467,GO:0015935,GO:0016020,GO:0016043,GO:0019538,GO:0019843,GO:0022607,GO:0022613,GO:0022618,GO:0022626,GO:0022627,GO:…	-	ko:K02992	ko03010,map03010	M00178,M00179	-	-	br01610,ko00000,ko00001,ko00002,ko03011	-	-	-	Ribosomal_S7
SH02_00245	644284.Arch_1392	6.04e-92	270.0	COG0049@1|root,COG0049@2|Bacteria,2GMVW@201174|Actinobacteria,4D4K3@85005|Actinomycetales	201174|Actinobacteria	J	One of the primary rRNA binding proteins, it binds directly to 16S rRNA where it nucleates assembly of the head domain of the 30S subunit. Is located at the subunit interface close to the decoding center, probably blocks exit of the E-site tRNA	rpsG	GO:0000028,GO:0003674,GO:0003676,GO:0003723,GO:0003729,GO:0003735,GO:0005198,GO:0005488,GO:0005575,GO:0005618,GO:0005622,GO:0005623,GO:0005737,GO:0005829,GO:0005840,GO:0005886,GO:0006412,GO:0006518,GO:0006807,GO:0006996,GO:0008150,GO:0008152,GO:0009058,GO:0009059,GO:0009987,GO:0010467,GO:0015935,GO:0016020,GO:0016043,GO:0019538,GO:0019843,GO:0022607,GO:0022613,GO:0022618,GO:0022626,GO:0022627,GO:…	-	ko:K02992	ko03010,map03010	M00178,M00179	-	-	br01610,ko00000,ko00001,ko00002,ko03011	-	-	-	Ribosomal_S7
SH03_07215	644284.Arch_1392	6.04e-92	270.0	COG0049@1|root,COG0049@2|Bacteria,2GMVW@201174|Actinobacteria,4D4K3@85005|Actinomycetales	201174|Actinobacteria	J	One of the primary rRNA binding proteins, it binds directly to 16S rRNA where it nucleates assembly of the head domain of the 30S subunit. Is located at the subunit interface close to the decoding center, probably blocks exit of the E-site tRNA	rpsG	GO:0000028,GO:0003674,GO:0003676,GO:0003723,GO:0003729,GO:0003735,GO:0005198,GO:0005488,GO:0005575,GO:0005618,GO:0005622,GO:0005623,GO:0005737,GO:0005829,GO:0005840,GO:0005886,GO:0006412,GO:0006518,GO:0006807,GO:0006996,GO:0008150,GO:0008152,GO:0009058,GO:0009059,GO:0009987,GO:0010467,GO:0015935,GO:0016020,GO:0016043,GO:0019538,GO:0019843,GO:0022607,GO:0022613,GO:0022618,GO:0022626,GO:0022627,GO:…	-	ko:K02992	ko03010,map03010	M00178,M00179	-	-	br01610,ko00000,ko00001,ko00002,ko03011	-	-	-	Ribosomal_S7
TP1_05865	644284.Arch_1392	6.04e-92	270.0	COG0049@1|root,COG0049@2|Bacteria,2GMVW@201174|Actinobacteria,4D4K3@85005|Actinomycetales	201174|Actinobacteria	J	One of the primary rRNA binding proteins, it binds directly to 16S rRNA where it nucleates assembly of the head domain of the 30S subunit. Is located at the subunit interface close to the decoding center, probably blocks exit of the E-site tRNA	rpsG	GO:0000028,GO:0003674,GO:0003676,GO:0003723,GO:0003729,GO:0003735,GO:0005198,GO:0005488,GO:0005575,GO:0005618,GO:0005622,GO:0005623,GO:0005737,GO:0005829,GO:0005840,GO:0005886,GO:0006412,GO:0006518,GO:0006807,GO:0006996,GO:0008150,GO:0008152,GO:0009058,GO:0009059,GO:0009987,GO:0010467,GO:0015935,GO:0016020,GO:0016043,GO:0019538,GO:0019843,GO:0022607,GO:0022613,GO:0022618,GO:0022626,GO:0022627,GO:…	-	ko:K02992	ko03010,map03010	M00178,M00179	-	-	br01610,ko00000,ko00001,ko00002,ko03011	-	-	-	Ribosomal_S7
TP2_01445	644284.Arch_1392	6.04e-92	270.0	COG0049@1|root,COG0049@2|Bacteria,2GMVW@201174|Actinobacteria,4D4K3@85005|Actinomycetales	201174|Actinobacteria	J	One of the primary rRNA binding proteins, it binds directly to 16S rRNA where it nucleates assembly of the head domain of the 30S subunit. Is located at the subunit interface close to the decoding center, probably blocks exit of the E-site tRNA	rpsG	GO:0000028,GO:0003674,GO:0003676,GO:0003723,GO:0003729,GO:0003735,GO:0005198,GO:0005488,GO:0005575,GO:0005618,GO:0005622,GO:0005623,GO:0005737,GO:0005829,GO:0005840,GO:0005886,GO:0006412,GO:0006518,GO:0006807,GO:0006996,GO:0008150,GO:0008152,GO:0009058,GO:0009059,GO:0009987,GO:0010467,GO:0015935,GO:0016020,GO:0016043,GO:0019538,GO:0019843,GO:0022607,GO:0022613,GO:0022618,GO:0022626,GO:0022627,GO:…	-	ko:K02992	ko03010,map03010	M00178,M00179	-	-	br01610,ko00000,ko00001,ko00002,ko03011	-	-	-	Ribosomal_S7
TP3_00650	644284.Arch_1392	6.04e-92	270.0	COG0049@1|root,COG0049@2|Bacteria,2GMVW@201174|Actinobacteria,4D4K3@85005|Actinomycetales	201174|Actinobacteria	J	One of the primary rRNA binding proteins, it binds directly to 16S rRNA where it nucleates assembly of the head domain of the 30S subunit. Is located at the subunit interface close to the decoding center, probably blocks exit of the E-site tRNA	rpsG	GO:0000028,GO:0003674,GO:0003676,GO:0003723,GO:0003729,GO:0003735,GO:0005198,GO:0005488,GO:0005575,GO:0005618,GO:0005622,GO:0005623,GO:0005737,GO:0005829,GO:0005840,GO:0005886,GO:0006412,GO:0006518,GO:0006807,GO:0006996,GO:0008150,GO:0008152,GO:0009058,GO:0009059,GO:0009987,GO:0010467,GO:0015935,GO:0016020,GO:0016043,GO:0019538,GO:0019843,GO:0022607,GO:0022613,GO:0022618,GO:0022626,GO:0022627,GO:…	-	ko:K02992	ko03010,map03010	M00178,M00179	-	-	br01610,ko00000,ko00001,ko00002,ko03011	-	-	-	Ribosomal_S7
TP4_04345	644284.Arch_1392	6.04e-92	270.0	COG0049@1|root,COG0049@2|Bacteria,2GMVW@201174|Actinobacteria,4D4K3@85005|Actinomycetales	201174|Actinobacteria	J	One of the primary rRNA binding proteins, it binds directly to 16S rRNA where it nucleates assembly of the head domain of the 30S subunit. Is located at the subunit interface close to the decoding center, probably blocks exit of the E-site tRNA	rpsG	GO:0000028,GO:0003674,GO:0003676,GO:0003723,GO:0003729,GO:0003735,GO:0005198,GO:0005488,GO:0005575,GO:0005618,GO:0005622,GO:0005623,GO:0005737,GO:0005829,GO:0005840,GO:0005886,GO:0006412,GO:0006518,GO:0006807,GO:0006996,GO:0008150,GO:0008152,GO:0009058,GO:0009059,GO:0009987,GO:0010467,GO:0015935,GO:0016020,GO:0016043,GO:0019538,GO:0019843,GO:0022607,GO:0022613,GO:0022618,GO:0022626,GO:0022627,GO:…	-	ko:K02992	ko03010,map03010	M00178,M00179	-	-	br01610,ko00000,ko00001,ko00002,ko03011	-	-	-	Ribosomal_S7
TP4479_07000	644284.Arch_1392	6.04e-92	270.0	COG0049@1|root,COG0049@2|Bacteria,2GMVW@201174|Actinobacteria,4D4K3@85005|Actinomycetales	201174|Actinobacteria	J	One of the primary rRNA binding proteins, it binds directly to 16S rRNA where it nucleates assembly of the head domain of the 30S subunit. Is located at the subunit interface close to the decoding center, probably blocks exit of the E-site tRNA	rpsG	GO:0000028,GO:0003674,GO:0003676,GO:0003723,GO:0003729,GO:0003735,GO:0005198,GO:0005488,GO:0005575,GO:0005618,GO:0005622,GO:0005623,GO:0005737,GO:0005829,GO:0005840,GO:0005886,GO:0006412,GO:0006518,GO:0006807,GO:0006996,GO:0008150,GO:0008152,GO:0009058,GO:0009059,GO:0009987,GO:0010467,GO:0015935,GO:0016020,GO:0016043,GO:0019538,GO:0019843,GO:0022607,GO:0022613,GO:0022618,GO:0022626,GO:0022627,GO:…	-	ko:K02992	ko03010,map03010	M00178,M00179	-	-	br01610,ko00000,ko00001,ko00002,ko03011	-	-	-	Ribosomal_S7
TP8_02960	644284.Arch_1392	6.04e-92	270.0	COG0049@1|root,COG0049@2|Bacteria,2GMVW@201174|Actinobacteria,4D4K3@85005|Actinomycetales	201174|Actinobacteria	J	One of the primary rRNA binding proteins, it binds directly to 16S rRNA where it nucleates assembly of the head domain of the 30S subunit. Is located at the subunit interface close to the decoding center, probably blocks exit of the E-site tRNA	rpsG	GO:0000028,GO:0003674,GO:0003676,GO:0003723,GO:0003729,GO:0003735,GO:0005198,GO:0005488,GO:0005575,GO:0005618,GO:0005622,GO:0005623,GO:0005737,GO:0005829,GO:0005840,GO:0005886,GO:0006412,GO:0006518,GO:0006807,GO:0006996,GO:0008150,GO:0008152,GO:0009058,GO:0009059,GO:0009987,GO:0010467,GO:0015935,GO:0016020,GO:0016043,GO:0019538,GO:0019843,GO:0022607,GO:0022613,GO:0022618,GO:0022626,GO:0022627,GO:…	-	ko:K02992	ko03010,map03010	M00178,M00179	-	-	br01610,ko00000,ko00001,ko00002,ko03011	-	-	-	Ribosomal_S7
TP_2849_08935	644284.Arch_1392	6.04e-92	270.0	COG0049@1|root,COG0049@2|Bacteria,2GMVW@201174|Actinobacteria,4D4K3@85005|Actinomycetales	201174|Actinobacteria	J	One of the primary rRNA binding proteins, it binds directly to 16S rRNA where it nucleates assembly of the head domain of the 30S subunit. Is located at the subunit interface close to the decoding center, probably blocks exit of the E-site tRNA	rpsG	GO:0000028,GO:0003674,GO:0003676,GO:0003723,GO:0003729,GO:0003735,GO:0005198,GO:0005488,GO:0005575,GO:0005618,GO:0005622,GO:0005623,GO:0005737,GO:0005829,GO:0005840,GO:0005886,GO:0006412,GO:0006518,GO:0006807,GO:0006996,GO:0008150,GO:0008152,GO:0009058,GO:0009059,GO:0009987,GO:0010467,GO:0015935,GO:0016020,GO:0016043,GO:0019538,GO:0019843,GO:0022607,GO:0022613,GO:0022618,GO:0022626,GO:0022627,GO:…	-	ko:K02992	ko03010,map03010	M00178,M00179	-	-	br01610,ko00000,ko00001,ko00002,ko03011	-	-	-	Ribosomal_S7
UFV1_01320	644284.Arch_1392	6.04e-92	270.0	COG0049@1|root,COG0049@2|Bacteria,2GMVW@201174|Actinobacteria,4D4K3@85005|Actinomycetales	201174|Actinobacteria	J	One of the primary rRNA binding proteins, it binds directly to 16S rRNA where it nucleates assembly of the head domain of the 30S subunit. Is located at the subunit interface close to the decoding center, probably blocks exit of the E-site tRNA	rpsG	GO:0000028,GO:0003674,GO:0003676,GO:0003723,GO:0003729,GO:0003735,GO:0005198,GO:0005488,GO:0005575,GO:0005618,GO:0005622,GO:0005623,GO:0005737,GO:0005829,GO:0005840,GO:0005886,GO:0006412,GO:0006518,GO:0006807,GO:0006996,GO:0008150,GO:0008152,GO:0009058,GO:0009059,GO:0009987,GO:0010467,GO:0015935,GO:0016020,GO:0016043,GO:0019538,GO:0019843,GO:0022607,GO:0022613,GO:0022618,GO:0022626,GO:0022627,GO:…	-	ko:K02992	ko03010,map03010	M00178,M00179	-	-	br01610,ko00000,ko00001,ko00002,ko03011	-	-	-	Ribosomal_S7
jx18_06010	644284.Arch_1392	6.04e-92	270.0	COG0049@1|root,COG0049@2|Bacteria,2GMVW@201174|Actinobacteria,4D4K3@85005|Actinomycetales	201174|Actinobacteria	J	One of the primary rRNA binding proteins, it binds directly to 16S rRNA where it nucleates assembly of the head domain of the 30S subunit. Is located at the subunit interface close to the decoding center, probably blocks exit of the E-site tRNA	rpsG	GO:0000028,GO:0003674,GO:0003676,GO:0003723,GO:0003729,GO:0003735,GO:0005198,GO:0005488,GO:0005575,GO:0005618,GO:0005622,GO:0005623,GO:0005737,GO:0005829,GO:0005840,GO:0005886,GO:0006412,GO:0006518,GO:0006807,GO:0006996,GO:0008150,GO:0008152,GO:0009058,GO:0009059,GO:0009987,GO:0010467,GO:0015935,GO:0016020,GO:0016043,GO:0019538,GO:0019843,GO:0022607,GO:0022613,GO:0022618,GO:0022626,GO:0022627,GO:…	-	ko:K02992	ko03010,map03010	M00178,M00179	-	-	br01610,ko00000,ko00001,ko00002,ko03011	-	-	-	Ribosomal_S7
TP6375_06470	644284.Arch_1646	4.22e-221	650.0	COG2812@1|root,COG2812@2|Bacteria,2GJKA@201174|Actinobacteria,4D4NC@85005|Actinomycetales	201174|Actinobacteria	L	DNA polymerase III is a complex, multichain enzyme responsible for most of the replicative synthesis in bacteria. This DNA polymerase also exhibits 3' to 5' exonuclease activity	dnaX	GO:0006139,GO:0006259,GO:0006260,GO:0006261,GO:0006725,GO:0006807,GO:0008150,GO:0008152,GO:0009058,GO:0009059,GO:0009987,GO:0034641,GO:0034645,GO:0040007,GO:0043170,GO:0044237,GO:0044238,GO:0044249,GO:0044260,GO:0046483,GO:0071704,GO:0090304,GO:1901360,GO:1901576	2.7.7.7	ko:K02343	ko00230,ko00240,ko01100,ko03030,ko03430,ko03440,map00230,map00240,map01100,map03030,map03430,map03440	M00260	R00375,R00376,R00377,R00378	RC02795	ko00000,ko00001,ko00002,ko01000,ko03032,ko03400	-	-	-	DNA_pol3_delta2,DNA_pol3_gamma3
2012CQ_ZSH_04085	644284.Arch_1646	3.3e-223	655.0	COG2812@1|root,COG2812@2|Bacteria,2GJKA@201174|Actinobacteria,4D4NC@85005|Actinomycetales	201174|Actinobacteria	L	DNA polymerase III is a complex, multichain enzyme responsible for most of the replicative synthesis in bacteria. This DNA polymerase also exhibits 3' to 5' exonuclease activity	dnaX	GO:0006139,GO:0006259,GO:0006260,GO:0006261,GO:0006725,GO:0006807,GO:0008150,GO:0008152,GO:0009058,GO:0009059,GO:0009987,GO:0034641,GO:0034645,GO:0040007,GO:0043170,GO:0044237,GO:0044238,GO:0044249,GO:0044260,GO:0046483,GO:0071704,GO:0090304,GO:1901360,GO:1901576	2.7.7.7	ko:K02343	ko00230,ko00240,ko01100,ko03030,ko03430,ko03440,map00230,map00240,map01100,map03030,map03430,map03440	M00260	R00375,R00376,R00377,R00378	RC02795	ko00000,ko00001,ko00002,ko01000,ko03032,ko03400	-	-	-	DNA_pol3_delta2,DNA_pol3_gamma3
Arash114_06505	644284.Arch_1646	2.11e-221	650.0	COG2812@1|root,COG2812@2|Bacteria,2GJKA@201174|Actinobacteria,4D4NC@85005|Actinomycetales	201174|Actinobacteria	L	DNA polymerase III is a complex, multichain enzyme responsible for most of the replicative synthesis in bacteria. This DNA polymerase also exhibits 3' to 5' exonuclease activity	dnaX	GO:0006139,GO:0006259,GO:0006260,GO:0006261,GO:0006725,GO:0006807,GO:0008150,GO:0008152,GO:0009058,GO:0009059,GO:0009987,GO:0034641,GO:0034645,GO:0040007,GO:0043170,GO:0044237,GO:0044238,GO:0044249,GO:0044260,GO:0046483,GO:0071704,GO:0090304,GO:1901360,GO:1901576	2.7.7.7	ko:K02343	ko00230,ko00240,ko01100,ko03030,ko03430,ko03440,map00230,map00240,map01100,map03030,map03430,map03440	M00260	R00375,R00376,R00377,R00378	RC02795	ko00000,ko00001,ko00002,ko01000,ko03032,ko03400	-	-	-	DNA_pol3_delta2,DNA_pol3_gamma3
Bu5_09135	644284.Arch_1646	3.18e-221	650.0	COG2812@1|root,COG2812@2|Bacteria,2GJKA@201174|Actinobacteria,4D4NC@85005|Actinomycetales	201174|Actinobacteria	L	DNA polymerase III is a complex, multichain enzyme responsible for most of the replicative synthesis in bacteria. This DNA polymerase also exhibits 3' to 5' exonuclease activity	dnaX	GO:0006139,GO:0006259,GO:0006260,GO:0006261,GO:0006725,GO:0006807,GO:0008150,GO:0008152,GO:0009058,GO:0009059,GO:0009987,GO:0034641,GO:0034645,GO:0040007,GO:0043170,GO:0044237,GO:0044238,GO:0044249,GO:0044260,GO:0046483,GO:0071704,GO:0090304,GO:1901360,GO:1901576	2.7.7.7	ko:K02343	ko00230,ko00240,ko01100,ko03030,ko03430,ko03440,map00230,map00240,map01100,map03030,map03430,map03440	M00260	R00375,R00376,R00377,R00378	RC02795	ko00000,ko00001,ko00002,ko01000,ko03032,ko03400	-	-	-	DNA_pol3_delta2,DNA_pol3_gamma3
DSM_20630_07300	644284.Arch_1646	1.22e-221	651.0	COG2812@1|root,COG2812@2|Bacteria,2GJKA@201174|Actinobacteria,4D4NC@85005|Actinomycetales	201174|Actinobacteria	L	DNA polymerase III is a complex, multichain enzyme responsible for most of the replicative synthesis in bacteria. This DNA polymerase also exhibits 3' to 5' exonuclease activity	dnaX	GO:0006139,GO:0006259,GO:0006260,GO:0006261,GO:0006725,GO:0006807,GO:0008150,GO:0008152,GO:0009058,GO:0009059,GO:0009987,GO:0034641,GO:0034645,GO:0040007,GO:0043170,GO:0044237,GO:0044238,GO:0044249,GO:0044260,GO:0046483,GO:0071704,GO:0090304,GO:1901360,GO:1901576	2.7.7.7	ko:K02343	ko00230,ko00240,ko01100,ko03030,ko03430,ko03440,map00230,map00240,map01100,map03030,map03430,map03440	M00260	R00375,R00376,R00377,R00378	RC02795	ko00000,ko00001,ko00002,ko01000,ko03032,ko03400	-	-	-	DNA_pol3_delta2,DNA_pol3_gamma3
MS249_08900	644284.Arch_1646	1.32e-222	654.0	COG2812@1|root,COG2812@2|Bacteria,2GJKA@201174|Actinobacteria,4D4NC@85005|Actinomycetales	201174|Actinobacteria	L	DNA polymerase III is a complex, multichain enzyme responsible for most of the replicative synthesis in bacteria. This DNA polymerase also exhibits 3' to 5' exonuclease activity	dnaX	GO:0006139,GO:0006259,GO:0006260,GO:0006261,GO:0006725,GO:0006807,GO:0008150,GO:0008152,GO:0009058,GO:0009059,GO:0009987,GO:0034641,GO:0034645,GO:0040007,GO:0043170,GO:0044237,GO:0044238,GO:0044249,GO:0044260,GO:0046483,GO:0071704,GO:0090304,GO:1901360,GO:1901576	2.7.7.7	ko:K02343	ko00230,ko00240,ko01100,ko03030,ko03430,ko03440,map00230,map00240,map01100,map03030,map03430,map03440	M00260	R00375,R00376,R00377,R00378	RC02795	ko00000,ko00001,ko00002,ko01000,ko03032,ko03400	-	-	-	DNA_pol3_delta2,DNA_pol3_gamma3
NCTC5224_01025	644284.Arch_1646	1.22e-221	651.0	COG2812@1|root,COG2812@2|Bacteria,2GJKA@201174|Actinobacteria,4D4NC@85005|Actinomycetales	201174|Actinobacteria	L	DNA polymerase III is a complex, multichain enzyme responsible for most of the replicative synthesis in bacteria. This DNA polymerase also exhibits 3' to 5' exonuclease activity	dnaX	GO:0006139,GO:0006259,GO:0006260,GO:0006261,GO:0006725,GO:0006807,GO:0008150,GO:0008152,GO:0009058,GO:0009059,GO:0009987,GO:0034641,GO:0034645,GO:0040007,GO:0043170,GO:0044237,GO:0044238,GO:0044249,GO:0044260,GO:0046483,GO:0071704,GO:0090304,GO:1901360,GO:1901576	2.7.7.7	ko:K02343	ko00230,ko00240,ko01100,ko03030,ko03430,ko03440,map00230,map00240,map01100,map03030,map03430,map03440	M00260	R00375,R00376,R00377,R00378	RC02795	ko00000,ko00001,ko00002,ko01000,ko03032,ko03400	-	-	-	DNA_pol3_delta2,DNA_pol3_gamma3
SH01_08830	644284.Arch_1646	3.3e-223	655.0	COG2812@1|root,COG2812@2|Bacteria,2GJKA@201174|Actinobacteria,4D4NC@85005|Actinomycetales	201174|Actinobacteria	L	DNA polymerase III is a complex, multichain enzyme responsible for most of the replicative synthesis in bacteria. This DNA polymerase also exhibits 3' to 5' exonuclease activity	dnaX	GO:0006139,GO:0006259,GO:0006260,GO:0006261,GO:0006725,GO:0006807,GO:0008150,GO:0008152,GO:0009058,GO:0009059,GO:0009987,GO:0034641,GO:0034645,GO:0040007,GO:0043170,GO:0044237,GO:0044238,GO:0044249,GO:0044260,GO:0046483,GO:0071704,GO:0090304,GO:1901360,GO:1901576	2.7.7.7	ko:K02343	ko00230,ko00240,ko01100,ko03030,ko03430,ko03440,map00230,map00240,map01100,map03030,map03430,map03440	M00260	R00375,R00376,R00377,R00378	RC02795	ko00000,ko00001,ko00002,ko01000,ko03032,ko03400	-	-	-	DNA_pol3_delta2,DNA_pol3_gamma3
SH02_10580	644284.Arch_1646	3.3e-223	655.0	COG2812@1|root,COG2812@2|Bacteria,2GJKA@201174|Actinobacteria,4D4NC@85005|Actinomycetales	201174|Actinobacteria	L	DNA polymerase III is a complex, multichain enzyme responsible for most of the replicative synthesis in bacteria. This DNA polymerase also exhibits 3' to 5' exonuclease activity	dnaX	GO:0006139,GO:0006259,GO:0006260,GO:0006261,GO:0006725,GO:0006807,GO:0008150,GO:0008152,GO:0009058,GO:0009059,GO:0009987,GO:0034641,GO:0034645,GO:0040007,GO:0043170,GO:0044237,GO:0044238,GO:0044249,GO:0044260,GO:0046483,GO:0071704,GO:0090304,GO:1901360,GO:1901576	2.7.7.7	ko:K02343	ko00230,ko00240,ko01100,ko03030,ko03430,ko03440,map00230,map00240,map01100,map03030,map03430,map03440	M00260	R00375,R00376,R00377,R00378	RC02795	ko00000,ko00001,ko00002,ko01000,ko03032,ko03400	-	-	-	DNA_pol3_delta2,DNA_pol3_gamma3
SH03_06180	644284.Arch_1646	3.3e-223	655.0	COG2812@1|root,COG2812@2|Bacteria,2GJKA@201174|Actinobacteria,4D4NC@85005|Actinomycetales	201174|Actinobacteria	L	DNA polymerase III is a complex, multichain enzyme responsible for most of the replicative synthesis in bacteria. This DNA polymerase also exhibits 3' to 5' exonuclease activity	dnaX	GO:0006139,GO:0006259,GO:0006260,GO:0006261,GO:0006725,GO:0006807,GO:0008150,GO:0008152,GO:0009058,GO:0009059,GO:0009987,GO:0034641,GO:0034645,GO:0040007,GO:0043170,GO:0044237,GO:0044238,GO:0044249,GO:0044260,GO:0046483,GO:0071704,GO:0090304,GO:1901360,GO:1901576	2.7.7.7	ko:K02343	ko00230,ko00240,ko01100,ko03030,ko03430,ko03440,map00230,map00240,map01100,map03030,map03430,map03440	M00260	R00375,R00376,R00377,R00378	RC02795	ko00000,ko00001,ko00002,ko01000,ko03032,ko03400	-	-	-	DNA_pol3_delta2,DNA_pol3_gamma3
TP1_07530	644284.Arch_1646	8.85e-222	652.0	COG2812@1|root,COG2812@2|Bacteria,2GJKA@201174|Actinobacteria,4D4NC@85005|Actinomycetales	201174|Actinobacteria	L	DNA polymerase III is a complex, multichain enzyme responsible for most of the replicative synthesis in bacteria. This DNA polymerase also exhibits 3' to 5' exonuclease activity	dnaX	GO:0006139,GO:0006259,GO:0006260,GO:0006261,GO:0006725,GO:0006807,GO:0008150,GO:0008152,GO:0009058,GO:0009059,GO:0009987,GO:0034641,GO:0034645,GO:0040007,GO:0043170,GO:0044237,GO:0044238,GO:0044249,GO:0044260,GO:0046483,GO:0071704,GO:0090304,GO:1901360,GO:1901576	2.7.7.7	ko:K02343	ko00230,ko00240,ko01100,ko03030,ko03430,ko03440,map00230,map00240,map01100,map03030,map03430,map03440	M00260	R00375,R00376,R00377,R00378	RC02795	ko00000,ko00001,ko00002,ko01000,ko03032,ko03400	-	-	-	DNA_pol3_delta2,DNA_pol3_gamma3
TP2_03190	644284.Arch_1646	1.49e-221	651.0	COG2812@1|root,COG2812@2|Bacteria,2GJKA@201174|Actinobacteria,4D4NC@85005|Actinomycetales	201174|Actinobacteria	L	DNA polymerase III is a complex, multichain enzyme responsible for most of the replicative synthesis in bacteria. This DNA polymerase also exhibits 3' to 5' exonuclease activity	dnaX	GO:0006139,GO:0006259,GO:0006260,GO:0006261,GO:0006725,GO:0006807,GO:0008150,GO:0008152,GO:0009058,GO:0009059,GO:0009987,GO:0034641,GO:0034645,GO:0040007,GO:0043170,GO:0044237,GO:0044238,GO:0044249,GO:0044260,GO:0046483,GO:0071704,GO:0090304,GO:1901360,GO:1901576	2.7.7.7	ko:K02343	ko00230,ko00240,ko01100,ko03030,ko03430,ko03440,map00230,map00240,map01100,map03030,map03430,map03440	M00260	R00375,R00376,R00377,R00378	RC02795	ko00000,ko00001,ko00002,ko01000,ko03032,ko03400	-	-	-	DNA_pol3_delta2,DNA_pol3_gamma3
TP3_09840	644284.Arch_1646	3.55e-217	640.0	COG2812@1|root,COG2812@2|Bacteria,2GJKA@201174|Actinobacteria,4D4NC@85005|Actinomycetales	201174|Actinobacteria	L	DNA polymerase III is a complex, multichain enzyme responsible for most of the replicative synthesis in bacteria. This DNA polymerase also exhibits 3' to 5' exonuclease activity	dnaX	GO:0006139,GO:0006259,GO:0006260,GO:0006261,GO:0006725,GO:0006807,GO:0008150,GO:0008152,GO:0009058,GO:0009059,GO:0009987,GO:0034641,GO:0034645,GO:0040007,GO:0043170,GO:0044237,GO:0044238,GO:0044249,GO:0044260,GO:0046483,GO:0071704,GO:0090304,GO:1901360,GO:1901576	2.7.7.7	ko:K02343	ko00230,ko00240,ko01100,ko03030,ko03430,ko03440,map00230,map00240,map01100,map03030,map03430,map03440	M00260	R00375,R00376,R00377,R00378	RC02795	ko00000,ko00001,ko00002,ko01000,ko03032,ko03400	-	-	-	DNA_pol3_delta2,DNA_pol3_gamma3
TP4_05985	644284.Arch_1646	1.27e-220	649.0	COG2812@1|root,COG2812@2|Bacteria,2GJKA@201174|Actinobacteria,4D4NC@85005|Actinomycetales	201174|Actinobacteria	L	DNA polymerase III is a complex, multichain enzyme responsible for most of the replicative synthesis in bacteria. This DNA polymerase also exhibits 3' to 5' exonuclease activity	dnaX	GO:0006139,GO:0006259,GO:0006260,GO:0006261,GO:0006725,GO:0006807,GO:0008150,GO:0008152,GO:0009058,GO:0009059,GO:0009987,GO:0034641,GO:0034645,GO:0040007,GO:0043170,GO:0044237,GO:0044238,GO:0044249,GO:0044260,GO:0046483,GO:0071704,GO:0090304,GO:1901360,GO:1901576	2.7.7.7	ko:K02343	ko00230,ko00240,ko01100,ko03030,ko03430,ko03440,map00230,map00240,map01100,map03030,map03430,map03440	M00260	R00375,R00376,R00377,R00378	RC02795	ko00000,ko00001,ko00002,ko01000,ko03032,ko03400	-	-	-	DNA_pol3_delta2,DNA_pol3_gamma3
TP4479_05320	644284.Arch_1646	5.02e-217	640.0	COG2812@1|root,COG2812@2|Bacteria,2GJKA@201174|Actinobacteria,4D4NC@85005|Actinomycetales	201174|Actinobacteria	L	DNA polymerase III is a complex, multichain enzyme responsible for most of the replicative synthesis in bacteria. This DNA polymerase also exhibits 3' to 5' exonuclease activity	dnaX	GO:0006139,GO:0006259,GO:0006260,GO:0006261,GO:0006725,GO:0006807,GO:0008150,GO:0008152,GO:0009058,GO:0009059,GO:0009987,GO:0034641,GO:0034645,GO:0040007,GO:0043170,GO:0044237,GO:0044238,GO:0044249,GO:0044260,GO:0046483,GO:0071704,GO:0090304,GO:1901360,GO:1901576	2.7.7.7	ko:K02343	ko00230,ko00240,ko01100,ko03030,ko03430,ko03440,map00230,map00240,map01100,map03030,map03430,map03440	M00260	R00375,R00376,R00377,R00378	RC02795	ko00000,ko00001,ko00002,ko01000,ko03032,ko03400	-	-	-	DNA_pol3_delta2,DNA_pol3_gamma3
TP8_01245	644284.Arch_1646	5.86e-220	647.0	COG2812@1|root,COG2812@2|Bacteria,2GJKA@201174|Actinobacteria,4D4NC@85005|Actinomycetales	201174|Actinobacteria	L	DNA polymerase III is a complex, multichain enzyme responsible for most of the replicative synthesis in bacteria. This DNA polymerase also exhibits 3' to 5' exonuclease activity	dnaX	GO:0006139,GO:0006259,GO:0006260,GO:0006261,GO:0006725,GO:0006807,GO:0008150,GO:0008152,GO:0009058,GO:0009059,GO:0009987,GO:0034641,GO:0034645,GO:0040007,GO:0043170,GO:0044237,GO:0044238,GO:0044249,GO:0044260,GO:0046483,GO:0071704,GO:0090304,GO:1901360,GO:1901576	2.7.7.7	ko:K02343	ko00230,ko00240,ko01100,ko03030,ko03430,ko03440,map00230,map00240,map01100,map03030,map03430,map03440	M00260	R00375,R00376,R00377,R00378	RC02795	ko00000,ko00001,ko00002,ko01000,ko03032,ko03400	-	-	-	DNA_pol3_delta2,DNA_pol3_gamma3
TP_2849_07255	644284.Arch_1646	3.55e-217	640.0	COG2812@1|root,COG2812@2|Bacteria,2GJKA@201174|Actinobacteria,4D4NC@85005|Actinomycetales	201174|Actinobacteria	L	DNA polymerase III is a complex, multichain enzyme responsible for most of the replicative synthesis in bacteria. This DNA polymerase also exhibits 3' to 5' exonuclease activity	dnaX	GO:0006139,GO:0006259,GO:0006260,GO:0006261,GO:0006725,GO:0006807,GO:0008150,GO:0008152,GO:0009058,GO:0009059,GO:0009987,GO:0034641,GO:0034645,GO:0040007,GO:0043170,GO:0044237,GO:0044238,GO:0044249,GO:0044260,GO:0046483,GO:0071704,GO:0090304,GO:1901360,GO:1901576	2.7.7.7	ko:K02343	ko00230,ko00240,ko01100,ko03030,ko03430,ko03440,map00230,map00240,map01100,map03030,map03430,map03440	M00260	R00375,R00376,R00377,R00378	RC02795	ko00000,ko00001,ko00002,ko01000,ko03032,ko03400	-	-	-	DNA_pol3_delta2,DNA_pol3_gamma3
UFV1_00065	644284.Arch_1646	4.22e-221	650.0	COG2812@1|root,COG2812@2|Bacteria,2GJKA@201174|Actinobacteria,4D4NC@85005|Actinomycetales	201174|Actinobacteria	L	DNA polymerase III is a complex, multichain enzyme responsible for most of the replicative synthesis in bacteria. This DNA polymerase also exhibits 3' to 5' exonuclease activity	dnaX	GO:0006139,GO:0006259,GO:0006260,GO:0006261,GO:0006725,GO:0006807,GO:0008150,GO:0008152,GO:0009058,GO:0009059,GO:0009987,GO:0034641,GO:0034645,GO:0040007,GO:0043170,GO:0044237,GO:0044238,GO:0044249,GO:0044260,GO:0046483,GO:0071704,GO:0090304,GO:1901360,GO:1901576	2.7.7.7	ko:K02343	ko00230,ko00240,ko01100,ko03030,ko03430,ko03440,map00230,map00240,map01100,map03030,map03430,map03440	M00260	R00375,R00376,R00377,R00378	RC02795	ko00000,ko00001,ko00002,ko01000,ko03032,ko03400	-	-	-	DNA_pol3_delta2,DNA_pol3_gamma3
jx18_07660	644284.Arch_1646	3.3e-223	655.0	COG2812@1|root,COG2812@2|Bacteria,2GJKA@201174|Actinobacteria,4D4NC@85005|Actinomycetales	201174|Actinobacteria	L	DNA polymerase III is a complex, multichain enzyme responsible for most of the replicative synthesis in bacteria. This DNA polymerase also exhibits 3' to 5' exonuclease activity	dnaX	GO:0006139,GO:0006259,GO:0006260,GO:0006261,GO:0006725,GO:0006807,GO:0008150,GO:0008152,GO:0009058,GO:0009059,GO:0009987,GO:0034641,GO:0034645,GO:0040007,GO:0043170,GO:0044237,GO:0044238,GO:0044249,GO:0044260,GO:0046483,GO:0071704,GO:0090304,GO:1901360,GO:1901576	2.7.7.7	ko:K02343	ko00230,ko00240,ko01100,ko03030,ko03430,ko03440,map00230,map00240,map01100,map03030,map03430,map03440	M00260	R00375,R00376,R00377,R00378	RC02795	ko00000,ko00001,ko00002,ko01000,ko03032,ko03400	-	-	-	DNA_pol3_delta2,DNA_pol3_gamma3
TP6375_08540	644284.Arch_0150	1.63e-255	715.0	COG0651@1|root,COG0651@2|Bacteria,2HAC7@201174|Actinobacteria,4D4QR@85005|Actinomycetales	201174|Actinobacteria	CP	Proton-conducting membrane transporter	mrpD	-	-	ko:K05568	-	-	-	-	ko00000,ko02000	2.A.63.1,2.A.63.2	-	-	Proton_antipo_M
2012CQ_ZSH_01985	644284.Arch_0150	1.63e-255	715.0	COG0651@1|root,COG0651@2|Bacteria,2HAC7@201174|Actinobacteria,4D4QR@85005|Actinomycetales	201174|Actinobacteria	CP	Proton-conducting membrane transporter	mrpD	-	-	ko:K05568	-	-	-	-	ko00000,ko02000	2.A.63.1,2.A.63.2	-	-	Proton_antipo_M
Arash114_08575	644284.Arch_0150	1.63e-255	715.0	COG0651@1|root,COG0651@2|Bacteria,2HAC7@201174|Actinobacteria,4D4QR@85005|Actinomycetales	201174|Actinobacteria	CP	Proton-conducting membrane transporter	mrpD	-	-	ko:K05568	-	-	-	-	ko00000,ko02000	2.A.63.1,2.A.63.2	-	-	Proton_antipo_M
Bu5_06765	644284.Arch_0150	1.15e-255	715.0	COG0651@1|root,COG0651@2|Bacteria,2HAC7@201174|Actinobacteria,4D4QR@85005|Actinomycetales	201174|Actinobacteria	CP	Proton-conducting membrane transporter	mrpD	-	-	ko:K05568	-	-	-	-	ko00000,ko02000	2.A.63.1,2.A.63.2	-	-	Proton_antipo_M
DSM_20630_06390	644284.Arch_0150	2.31e-255	714.0	COG0651@1|root,COG0651@2|Bacteria,2HAC7@201174|Actinobacteria,4D4QR@85005|Actinomycetales	201174|Actinobacteria	CP	Proton-conducting membrane transporter	mrpD	-	-	ko:K05568	-	-	-	-	ko00000,ko02000	2.A.63.1,2.A.63.2	-	-	Proton_antipo_M
MS249_01500	644284.Arch_0150	5.69e-256	716.0	COG0651@1|root,COG0651@2|Bacteria,2HAC7@201174|Actinobacteria,4D4QR@85005|Actinomycetales	201174|Actinobacteria	CP	Proton-conducting membrane transporter	mrpD	-	-	ko:K05568	-	-	-	-	ko00000,ko02000	2.A.63.1,2.A.63.2	-	-	Proton_antipo_M
NCTC5224_09275	644284.Arch_0150	2.31e-255	714.0	COG0651@1|root,COG0651@2|Bacteria,2HAC7@201174|Actinobacteria,4D4QR@85005|Actinomycetales	201174|Actinobacteria	CP	Proton-conducting membrane transporter	mrpD	-	-	ko:K05568	-	-	-	-	ko00000,ko02000	2.A.63.1,2.A.63.2	-	-	Proton_antipo_M
SH01_05355	644284.Arch_0150	1.63e-255	715.0	COG0651@1|root,COG0651@2|Bacteria,2HAC7@201174|Actinobacteria,4D4QR@85005|Actinomycetales	201174|Actinobacteria	CP	Proton-conducting membrane transporter	mrpD	-	-	ko:K05568	-	-	-	-	ko00000,ko02000	2.A.63.1,2.A.63.2	-	-	Proton_antipo_M
SH02_10535	644284.Arch_0150	1.63e-255	715.0	COG0651@1|root,COG0651@2|Bacteria,2HAC7@201174|Actinobacteria,4D4QR@85005|Actinomycetales	201174|Actinobacteria	CP	Proton-conducting membrane transporter	mrpD	-	-	ko:K05568	-	-	-	-	ko00000,ko02000	2.A.63.1,2.A.63.2	-	-	Proton_antipo_M
SH03_04945	644284.Arch_0150	1.63e-255	715.0	COG0651@1|root,COG0651@2|Bacteria,2HAC7@201174|Actinobacteria,4D4QR@85005|Actinomycetales	201174|Actinobacteria	CP	Proton-conducting membrane transporter	mrpD	-	-	ko:K05568	-	-	-	-	ko00000,ko02000	2.A.63.1,2.A.63.2	-	-	Proton_antipo_M
TP1_09530	644284.Arch_0150	1.63e-255	715.0	COG0651@1|root,COG0651@2|Bacteria,2HAC7@201174|Actinobacteria,4D4QR@85005|Actinomycetales	201174|Actinobacteria	CP	Proton-conducting membrane transporter	mrpD	-	-	ko:K05568	-	-	-	-	ko00000,ko02000	2.A.63.1,2.A.63.2	-	-	Proton_antipo_M
TP2_05200	644284.Arch_0150	4.4e-253	709.0	COG0651@1|root,COG0651@2|Bacteria,2HAC7@201174|Actinobacteria,4D4QR@85005|Actinomycetales	201174|Actinobacteria	CP	Proton-conducting membrane transporter	mrpD	-	-	ko:K05568	-	-	-	-	ko00000,ko02000	2.A.63.1,2.A.63.2	-	-	Proton_antipo_M
TP3_07810	644284.Arch_0150	1.63e-255	715.0	COG0651@1|root,COG0651@2|Bacteria,2HAC7@201174|Actinobacteria,4D4QR@85005|Actinomycetales	201174|Actinobacteria	CP	Proton-conducting membrane transporter	mrpD	-	-	ko:K05568	-	-	-	-	ko00000,ko02000	2.A.63.1,2.A.63.2	-	-	Proton_antipo_M
TP4_08345	644284.Arch_0150	1.63e-255	715.0	COG0651@1|root,COG0651@2|Bacteria,2HAC7@201174|Actinobacteria,4D4QR@85005|Actinomycetales	201174|Actinobacteria	CP	Proton-conducting membrane transporter	mrpD	-	-	ko:K05568	-	-	-	-	ko00000,ko02000	2.A.63.1,2.A.63.2	-	-	Proton_antipo_M
TP4479_03290	644284.Arch_0150	1.63e-255	715.0	COG0651@1|root,COG0651@2|Bacteria,2HAC7@201174|Actinobacteria,4D4QR@85005|Actinomycetales	201174|Actinobacteria	CP	Proton-conducting membrane transporter	mrpD	-	-	ko:K05568	-	-	-	-	ko00000,ko02000	2.A.63.1,2.A.63.2	-	-	Proton_antipo_M
TP8_09790	644284.Arch_0150	1.63e-255	715.0	COG0651@1|root,COG0651@2|Bacteria,2HAC7@201174|Actinobacteria,4D4QR@85005|Actinomycetales	201174|Actinobacteria	CP	Proton-conducting membrane transporter	mrpD	-	-	ko:K05568	-	-	-	-	ko00000,ko02000	2.A.63.1,2.A.63.2	-	-	Proton_antipo_M
TP_2849_05225	644284.Arch_0150	1.63e-255	715.0	COG0651@1|root,COG0651@2|Bacteria,2HAC7@201174|Actinobacteria,4D4QR@85005|Actinomycetales	201174|Actinobacteria	CP	Proton-conducting membrane transporter	mrpD	-	-	ko:K05568	-	-	-	-	ko00000,ko02000	2.A.63.1,2.A.63.2	-	-	Proton_antipo_M
UFV1_06565	644284.Arch_0150	1.63e-255	715.0	COG0651@1|root,COG0651@2|Bacteria,2HAC7@201174|Actinobacteria,4D4QR@85005|Actinomycetales	201174|Actinobacteria	CP	Proton-conducting membrane transporter	mrpD	-	-	ko:K05568	-	-	-	-	ko00000,ko02000	2.A.63.1,2.A.63.2	-	-	Proton_antipo_M
jx18_10180	644284.Arch_0150	1.63e-255	715.0	COG0651@1|root,COG0651@2|Bacteria,2HAC7@201174|Actinobacteria,4D4QR@85005|Actinomycetales	201174|Actinobacteria	CP	Proton-conducting membrane transporter	mrpD	-	-	ko:K05568	-	-	-	-	ko00000,ko02000	2.A.63.1,2.A.63.2	-	-	Proton_antipo_M
TP6375_02605	1123488.ATUF01000002_gene119	7.26e-187	527.0	COG0240@1|root,COG0240@2|Bacteria,2GJSD@201174|Actinobacteria,4D4GP@85005|Actinomycetales	201174|Actinobacteria	I	Glycerol-3-phosphate dehydrogenase	-	-	1.1.1.94	ko:K00057	ko00564,ko01110,map00564,map01110	-	R00842,R00844	RC00029	ko00000,ko00001,ko01000	-	-	-	NAD_Gly3P_dh_C,NAD_Gly3P_dh_N
2012CQ_ZSH_07600	1123488.ATUF01000002_gene119	1.79e-187	529.0	COG0240@1|root,COG0240@2|Bacteria,2GJSD@201174|Actinobacteria,4D4GP@85005|Actinomycetales	201174|Actinobacteria	I	Glycerol-3-phosphate dehydrogenase	-	-	1.1.1.94	ko:K00057	ko00564,ko01110,map00564,map01110	-	R00842,R00844	RC00029	ko00000,ko00001,ko01000	-	-	-	NAD_Gly3P_dh_C,NAD_Gly3P_dh_N
Arash114_02600	1123488.ATUF01000002_gene119	5.11e-187	528.0	COG0240@1|root,COG0240@2|Bacteria,2GJSD@201174|Actinobacteria,4D4GP@85005|Actinomycetales	201174|Actinobacteria	I	Glycerol-3-phosphate dehydrogenase	-	-	1.1.1.94	ko:K00057	ko00564,ko01110,map00564,map01110	-	R00842,R00844	RC00029	ko00000,ko00001,ko01000	-	-	-	NAD_Gly3P_dh_C,NAD_Gly3P_dh_N
Bu5_03435	1123488.ATUF01000002_gene119	1.26e-187	529.0	COG0240@1|root,COG0240@2|Bacteria,2GJSD@201174|Actinobacteria,4D4GP@85005|Actinomycetales	201174|Actinobacteria	I	Glycerol-3-phosphate dehydrogenase	-	-	1.1.1.94	ko:K00057	ko00564,ko01110,map00564,map01110	-	R00842,R00844	RC00029	ko00000,ko00001,ko01000	-	-	-	NAD_Gly3P_dh_C,NAD_Gly3P_dh_N
DSM_20630_02200	1123488.ATUF01000002_gene119	1.46e-186	526.0	COG0240@1|root,COG0240@2|Bacteria,2GJSD@201174|Actinobacteria,4D4GP@85005|Actinomycetales	201174|Actinobacteria	I	Glycerol-3-phosphate dehydrogenase	-	-	1.1.1.94	ko:K00057	ko00564,ko01110,map00564,map01110	-	R00842,R00844	RC00029	ko00000,ko00001,ko01000	-	-	-	NAD_Gly3P_dh_C,NAD_Gly3P_dh_N
MS249_03300	1123488.ATUF01000002_gene119	9.8e-185	522.0	COG0240@1|root,COG0240@2|Bacteria,2GJSD@201174|Actinobacteria,4D4GP@85005|Actinomycetales	201174|Actinobacteria	I	Glycerol-3-phosphate dehydrogenase	-	-	1.1.1.94	ko:K00057	ko00564,ko01110,map00564,map01110	-	R00842,R00844	RC00029	ko00000,ko00001,ko01000	-	-	-	NAD_Gly3P_dh_C,NAD_Gly3P_dh_N
NCTC5224_04595	1123488.ATUF01000002_gene119	1.46e-186	526.0	COG0240@1|root,COG0240@2|Bacteria,2GJSD@201174|Actinobacteria,4D4GP@85005|Actinomycetales	201174|Actinobacteria	I	Glycerol-3-phosphate dehydrogenase	-	-	1.1.1.94	ko:K00057	ko00564,ko01110,map00564,map01110	-	R00842,R00844	RC00029	ko00000,ko00001,ko01000	-	-	-	NAD_Gly3P_dh_C,NAD_Gly3P_dh_N
SH01_04715	1123488.ATUF01000002_gene119	8.44e-186	525.0	COG0240@1|root,COG0240@2|Bacteria,2GJSD@201174|Actinobacteria,4D4GP@85005|Actinomycetales	201174|Actinobacteria	I	Glycerol-3-phosphate dehydrogenase	-	-	1.1.1.94	ko:K00057	ko00564,ko01110,map00564,map01110	-	R00842,R00844	RC00029	ko00000,ko00001,ko01000	-	-	-	NAD_Gly3P_dh_C,NAD_Gly3P_dh_N
SH02_03105	1123488.ATUF01000002_gene119	8.44e-186	525.0	COG0240@1|root,COG0240@2|Bacteria,2GJSD@201174|Actinobacteria,4D4GP@85005|Actinomycetales	201174|Actinobacteria	I	Glycerol-3-phosphate dehydrogenase	-	-	1.1.1.94	ko:K00057	ko00564,ko01110,map00564,map01110	-	R00842,R00844	RC00029	ko00000,ko00001,ko01000	-	-	-	NAD_Gly3P_dh_C,NAD_Gly3P_dh_N
SH03_02410	1123488.ATUF01000002_gene119	8.44e-186	525.0	COG0240@1|root,COG0240@2|Bacteria,2GJSD@201174|Actinobacteria,4D4GP@85005|Actinomycetales	201174|Actinobacteria	I	Glycerol-3-phosphate dehydrogenase	-	-	1.1.1.94	ko:K00057	ko00564,ko01110,map00564,map01110	-	R00842,R00844	RC00029	ko00000,ko00001,ko01000	-	-	-	NAD_Gly3P_dh_C,NAD_Gly3P_dh_N
TP1_03945	1123488.ATUF01000002_gene119	1.26e-187	529.0	COG0240@1|root,COG0240@2|Bacteria,2GJSD@201174|Actinobacteria,4D4GP@85005|Actinomycetales	201174|Actinobacteria	I	Glycerol-3-phosphate dehydrogenase	-	-	1.1.1.94	ko:K00057	ko00564,ko01110,map00564,map01110	-	R00842,R00844	RC00029	ko00000,ko00001,ko01000	-	-	-	NAD_Gly3P_dh_C,NAD_Gly3P_dh_N
TP2_09940	1123488.ATUF01000002_gene119	1.26e-187	529.0	COG0240@1|root,COG0240@2|Bacteria,2GJSD@201174|Actinobacteria,4D4GP@85005|Actinomycetales	201174|Actinobacteria	I	Glycerol-3-phosphate dehydrogenase	-	-	1.1.1.94	ko:K00057	ko00564,ko01110,map00564,map01110	-	R00842,R00844	RC00029	ko00000,ko00001,ko01000	-	-	-	NAD_Gly3P_dh_C,NAD_Gly3P_dh_N
TP3_02735	1123488.ATUF01000002_gene119	1.46e-186	526.0	COG0240@1|root,COG0240@2|Bacteria,2GJSD@201174|Actinobacteria,4D4GP@85005|Actinomycetales	201174|Actinobacteria	I	Glycerol-3-phosphate dehydrogenase	-	-	1.1.1.94	ko:K00057	ko00564,ko01110,map00564,map01110	-	R00842,R00844	RC00029	ko00000,ko00001,ko01000	-	-	-	NAD_Gly3P_dh_C,NAD_Gly3P_dh_N
TP4_01910	1123488.ATUF01000002_gene119	8.44e-186	525.0	COG0240@1|root,COG0240@2|Bacteria,2GJSD@201174|Actinobacteria,4D4GP@85005|Actinomycetales	201174|Actinobacteria	I	Glycerol-3-phosphate dehydrogenase	-	-	1.1.1.94	ko:K00057	ko00564,ko01110,map00564,map01110	-	R00842,R00844	RC00029	ko00000,ko00001,ko01000	-	-	-	NAD_Gly3P_dh_C,NAD_Gly3P_dh_N
TP4479_09080	1123488.ATUF01000002_gene119	1.46e-186	526.0	COG0240@1|root,COG0240@2|Bacteria,2GJSD@201174|Actinobacteria,4D4GP@85005|Actinomycetales	201174|Actinobacteria	I	Glycerol-3-phosphate dehydrogenase	-	-	1.1.1.94	ko:K00057	ko00564,ko01110,map00564,map01110	-	R00842,R00844	RC00029	ko00000,ko00001,ko01000	-	-	-	NAD_Gly3P_dh_C,NAD_Gly3P_dh_N
TP8_05085	1123488.ATUF01000002_gene119	7.26e-187	527.0	COG0240@1|root,COG0240@2|Bacteria,2GJSD@201174|Actinobacteria,4D4GP@85005|Actinomycetales	201174|Actinobacteria	I	Glycerol-3-phosphate dehydrogenase	-	-	1.1.1.94	ko:K00057	ko00564,ko01110,map00564,map01110	-	R00842,R00844	RC00029	ko00000,ko00001,ko01000	-	-	-	NAD_Gly3P_dh_C,NAD_Gly3P_dh_N
TP_2849_00140	1123488.ATUF01000002_gene119	1.46e-186	526.0	COG0240@1|root,COG0240@2|Bacteria,2GJSD@201174|Actinobacteria,4D4GP@85005|Actinomycetales	201174|Actinobacteria	I	Glycerol-3-phosphate dehydrogenase	-	-	1.1.1.94	ko:K00057	ko00564,ko01110,map00564,map01110	-	R00842,R00844	RC00029	ko00000,ko00001,ko01000	-	-	-	NAD_Gly3P_dh_C,NAD_Gly3P_dh_N
UFV1_09935	1123488.ATUF01000002_gene119	7.26e-187	527.0	COG0240@1|root,COG0240@2|Bacteria,2GJSD@201174|Actinobacteria,4D4GP@85005|Actinomycetales	201174|Actinobacteria	I	Glycerol-3-phosphate dehydrogenase	-	-	1.1.1.94	ko:K00057	ko00564,ko01110,map00564,map01110	-	R00842,R00844	RC00029	ko00000,ko00001,ko01000	-	-	-	NAD_Gly3P_dh_C,NAD_Gly3P_dh_N
jx18_03690	1123488.ATUF01000002_gene119	8.44e-186	525.0	COG0240@1|root,COG0240@2|Bacteria,2GJSD@201174|Actinobacteria,4D4GP@85005|Actinomycetales	201174|Actinobacteria	I	Glycerol-3-phosphate dehydrogenase	-	-	1.1.1.94	ko:K00057	ko00564,ko01110,map00564,map01110	-	R00842,R00844	RC00029	ko00000,ko00001,ko01000	-	-	-	NAD_Gly3P_dh_C,NAD_Gly3P_dh_N
TP6375_05265	644284.Arch_1440	1.48e-200	587.0	COG1132@1|root,COG1132@2|Bacteria,2GJAP@201174|Actinobacteria,4D3JD@85005|Actinomycetales	201174|Actinobacteria	V	ABC transporter transmembrane region	-	-	-	-	-	-	-	-	-	-	-	-	ABC_membrane,ABC_tran
2012CQ_ZSH_05250	644284.Arch_1440	6.96e-202	590.0	COG1132@1|root,COG1132@2|Bacteria,2GJAP@201174|Actinobacteria,4D3JD@85005|Actinomycetales	201174|Actinobacteria	V	ABC transporter transmembrane region	-	-	-	-	-	-	-	-	-	-	-	-	ABC_membrane,ABC_tran
Arash114_05265	644284.Arch_1440	7.4e-201	588.0	COG1132@1|root,COG1132@2|Bacteria,2GJAP@201174|Actinobacteria,4D3JD@85005|Actinomycetales	201174|Actinobacteria	V	ABC transporter transmembrane region	-	-	-	-	-	-	-	-	-	-	-	-	ABC_membrane,ABC_tran
Bu5_01130	644284.Arch_1440	7.4e-201	588.0	COG1132@1|root,COG1132@2|Bacteria,2GJAP@201174|Actinobacteria,4D3JD@85005|Actinomycetales	201174|Actinobacteria	V	ABC transporter transmembrane region	-	-	-	-	-	-	-	-	-	-	-	-	ABC_membrane,ABC_tran
DSM_20630_05675	644284.Arch_1440	6.5e-202	590.0	COG1132@1|root,COG1132@2|Bacteria,2GJAP@201174|Actinobacteria,4D3JD@85005|Actinomycetales	201174|Actinobacteria	V	ABC transporter transmembrane region	-	-	-	-	-	-	-	-	-	-	-	-	ABC_membrane,ABC_tran
MS249_00650	644284.Arch_1440	1.3e-201	590.0	COG1132@1|root,COG1132@2|Bacteria,2GJAP@201174|Actinobacteria,4D3JD@85005|Actinomycetales	201174|Actinobacteria	V	ABC transporter transmembrane region	-	-	-	-	-	-	-	-	-	-	-	-	ABC_membrane,ABC_tran
NCTC5224_02235	644284.Arch_1440	6.5e-202	590.0	COG1132@1|root,COG1132@2|Bacteria,2GJAP@201174|Actinobacteria,4D3JD@85005|Actinomycetales	201174|Actinobacteria	V	ABC transporter transmembrane region	-	-	-	-	-	-	-	-	-	-	-	-	ABC_membrane,ABC_tran
SH01_01110	644284.Arch_1440	6.5e-202	590.0	COG1132@1|root,COG1132@2|Bacteria,2GJAP@201174|Actinobacteria,4D3JD@85005|Actinomycetales	201174|Actinobacteria	V	ABC transporter transmembrane region	-	-	-	-	-	-	-	-	-	-	-	-	ABC_membrane,ABC_tran
SH02_00700	644284.Arch_1440	5.23e-201	588.0	COG1132@1|root,COG1132@2|Bacteria,2GJAP@201174|Actinobacteria,4D3JD@85005|Actinomycetales	201174|Actinobacteria	V	ABC transporter transmembrane region	-	-	-	-	-	-	-	-	-	-	-	-	ABC_membrane,ABC_tran
SH03_07670	644284.Arch_1440	5.23e-201	588.0	COG1132@1|root,COG1132@2|Bacteria,2GJAP@201174|Actinobacteria,4D3JD@85005|Actinomycetales	201174|Actinobacteria	V	ABC transporter transmembrane region	-	-	-	-	-	-	-	-	-	-	-	-	ABC_membrane,ABC_tran
TP1_06320	644284.Arch_1440	1.05e-200	587.0	COG1132@1|root,COG1132@2|Bacteria,2GJAP@201174|Actinobacteria,4D3JD@85005|Actinomycetales	201174|Actinobacteria	V	ABC transporter transmembrane region	-	-	-	-	-	-	-	-	-	-	-	-	ABC_membrane,ABC_tran
TP2_01900	644284.Arch_1440	3.69e-201	588.0	COG1132@1|root,COG1132@2|Bacteria,2GJAP@201174|Actinobacteria,4D3JD@85005|Actinomycetales	201174|Actinobacteria	V	ABC transporter transmembrane region	-	-	-	-	-	-	-	-	-	-	-	-	ABC_membrane,ABC_tran
TP3_00200	644284.Arch_1440	3.09e-201	589.0	COG1132@1|root,COG1132@2|Bacteria,2GJAP@201174|Actinobacteria,4D3JD@85005|Actinomycetales	201174|Actinobacteria	V	ABC transporter transmembrane region	-	-	-	-	-	-	-	-	-	-	-	-	ABC_membrane,ABC_tran
TP4_04795	644284.Arch_1440	1.09e-201	590.0	COG1132@1|root,COG1132@2|Bacteria,2GJAP@201174|Actinobacteria,4D3JD@85005|Actinomycetales	201174|Actinobacteria	V	ABC transporter transmembrane region	-	-	-	-	-	-	-	-	-	-	-	-	ABC_membrane,ABC_tran
TP4479_06550	644284.Arch_1440	3.09e-201	589.0	COG1132@1|root,COG1132@2|Bacteria,2GJAP@201174|Actinobacteria,4D3JD@85005|Actinomycetales	201174|Actinobacteria	V	ABC transporter transmembrane region	-	-	-	-	-	-	-	-	-	-	-	-	ABC_membrane,ABC_tran
TP8_02475	644284.Arch_1440	8.61e-166	491.0	COG1132@1|root,COG1132@2|Bacteria,2GJAP@201174|Actinobacteria,4D3JD@85005|Actinomycetales	201174|Actinobacteria	V	ABC transporter transmembrane region	-	-	-	-	-	-	-	-	-	-	-	-	ABC_membrane,ABC_tran
TP_2849_08485	644284.Arch_1440	3.09e-201	589.0	COG1132@1|root,COG1132@2|Bacteria,2GJAP@201174|Actinobacteria,4D3JD@85005|Actinomycetales	201174|Actinobacteria	V	ABC transporter transmembrane region	-	-	-	-	-	-	-	-	-	-	-	-	ABC_membrane,ABC_tran
UFV1_00820	644284.Arch_1440	1.48e-200	587.0	COG1132@1|root,COG1132@2|Bacteria,2GJAP@201174|Actinobacteria,4D3JD@85005|Actinomycetales	201174|Actinobacteria	V	ABC transporter transmembrane region	-	-	-	-	-	-	-	-	-	-	-	-	ABC_membrane,ABC_tran
jx18_06465	644284.Arch_1440	1.09e-201	590.0	COG1132@1|root,COG1132@2|Bacteria,2GJAP@201174|Actinobacteria,4D3JD@85005|Actinomycetales	201174|Actinobacteria	V	ABC transporter transmembrane region	-	-	-	-	-	-	-	-	-	-	-	-	ABC_membrane,ABC_tran
TP6375_08355	861360.AARI_25070	1.85e-22	87.0	2E3JZ@1|root,32YI8@2|Bacteria,2GQIX@201174|Actinobacteria,1WA0R@1268|Micrococcaceae	201174|Actinobacteria	-	-	-	-	-	-	-	-	-	-	-	-	-	-	DUF4177
2012CQ_ZSH_02225	861360.AARI_25070	1.85e-22	87.0	2E3JZ@1|root,32YI8@2|Bacteria,2GQIX@201174|Actinobacteria,1WA0R@1268|Micrococcaceae	201174|Actinobacteria	-	-	-	-	-	-	-	-	-	-	-	-	-	-	DUF4177
Arash114_08390	861360.AARI_25070	1.85e-22	87.0	2E3JZ@1|root,32YI8@2|Bacteria,2GQIX@201174|Actinobacteria,1WA0R@1268|Micrococcaceae	201174|Actinobacteria	-	-	-	-	-	-	-	-	-	-	-	-	-	-	DUF4177
Bu5_06930	861360.AARI_25070	2.25e-22	87.4	2E3JZ@1|root,32YI8@2|Bacteria,2GQIX@201174|Actinobacteria,1WA0R@1268|Micrococcaceae	201174|Actinobacteria	-	-	-	-	-	-	-	-	-	-	-	-	-	-	DUF4177
DSM_20630_06215	861360.AARI_25070	2.25e-22	87.4	2E3JZ@1|root,32YI8@2|Bacteria,2GQIX@201174|Actinobacteria,1WA0R@1268|Micrococcaceae	201174|Actinobacteria	-	-	-	-	-	-	-	-	-	-	-	-	-	-	DUF4177
MS249_04075	861360.AARI_25070	3.2e-22	87.0	2E3JZ@1|root,32YI8@2|Bacteria,2GQIX@201174|Actinobacteria,1WA0R@1268|Micrococcaceae	201174|Actinobacteria	-	-	-	-	-	-	-	-	-	-	-	-	-	-	DUF4177
NCTC5224_09450	861360.AARI_25070	2.25e-22	87.4	2E3JZ@1|root,32YI8@2|Bacteria,2GQIX@201174|Actinobacteria,1WA0R@1268|Micrococcaceae	201174|Actinobacteria	-	-	-	-	-	-	-	-	-	-	-	-	-	-	DUF4177
SH01_05540	861360.AARI_25070	1.85e-22	87.0	2E3JZ@1|root,32YI8@2|Bacteria,2GQIX@201174|Actinobacteria,1WA0R@1268|Micrococcaceae	201174|Actinobacteria	-	-	-	-	-	-	-	-	-	-	-	-	-	-	DUF4177
SH02_08895	861360.AARI_25070	1.85e-22	87.0	2E3JZ@1|root,32YI8@2|Bacteria,2GQIX@201174|Actinobacteria,1WA0R@1268|Micrococcaceae	201174|Actinobacteria	-	-	-	-	-	-	-	-	-	-	-	-	-	-	DUF4177
SH03_04650	861360.AARI_25070	1.85e-22	87.0	2E3JZ@1|root,32YI8@2|Bacteria,2GQIX@201174|Actinobacteria,1WA0R@1268|Micrococcaceae	201174|Actinobacteria	-	-	-	-	-	-	-	-	-	-	-	-	-	-	DUF4177
TP1_09365	861360.AARI_25070	2.25e-22	87.4	2E3JZ@1|root,32YI8@2|Bacteria,2GQIX@201174|Actinobacteria,1WA0R@1268|Micrococcaceae	201174|Actinobacteria	-	-	-	-	-	-	-	-	-	-	-	-	-	-	DUF4177
TP2_05030	861360.AARI_25070	2.25e-22	87.4	2E3JZ@1|root,32YI8@2|Bacteria,2GQIX@201174|Actinobacteria,1WA0R@1268|Micrococcaceae	201174|Actinobacteria	-	-	-	-	-	-	-	-	-	-	-	-	-	-	DUF4177
TP3_07995	861360.AARI_25070	1.85e-22	87.0	2E3JZ@1|root,32YI8@2|Bacteria,2GQIX@201174|Actinobacteria,1WA0R@1268|Micrococcaceae	201174|Actinobacteria	-	-	-	-	-	-	-	-	-	-	-	-	-	-	DUF4177
TP4_07850	861360.AARI_25070	1.85e-22	87.0	2E3JZ@1|root,32YI8@2|Bacteria,2GQIX@201174|Actinobacteria,1WA0R@1268|Micrococcaceae	201174|Actinobacteria	-	-	-	-	-	-	-	-	-	-	-	-	-	-	DUF4177
TP4479_03475	861360.AARI_25070	1.85e-22	87.0	2E3JZ@1|root,32YI8@2|Bacteria,2GQIX@201174|Actinobacteria,1WA0R@1268|Micrococcaceae	201174|Actinobacteria	-	-	-	-	-	-	-	-	-	-	-	-	-	-	DUF4177
TP8_09950	861360.AARI_25070	3.2e-22	87.0	2E3JZ@1|root,32YI8@2|Bacteria,2GQIX@201174|Actinobacteria,1WA0R@1268|Micrococcaceae	201174|Actinobacteria	-	-	-	-	-	-	-	-	-	-	-	-	-	-	DUF4177
TP_2849_05410	861360.AARI_25070	1.85e-22	87.0	2E3JZ@1|root,32YI8@2|Bacteria,2GQIX@201174|Actinobacteria,1WA0R@1268|Micrococcaceae	201174|Actinobacteria	-	-	-	-	-	-	-	-	-	-	-	-	-	-	DUF4177
UFV1_06725	861360.AARI_25070	3.2e-22	87.0	2E3JZ@1|root,32YI8@2|Bacteria,2GQIX@201174|Actinobacteria,1WA0R@1268|Micrococcaceae	201174|Actinobacteria	-	-	-	-	-	-	-	-	-	-	-	-	-	-	DUF4177
jx18_09995	861360.AARI_25070	1.85e-22	87.0	2E3JZ@1|root,32YI8@2|Bacteria,2GQIX@201174|Actinobacteria,1WA0R@1268|Micrococcaceae	201174|Actinobacteria	-	-	-	-	-	-	-	-	-	-	-	-	-	-	DUF4177
TP6375_08400	644284.Arch_1714	7.1e-41	143.0	COG4965@1|root,COG4965@2|Bacteria,2GQ2Z@201174|Actinobacteria,4D52S@85005|Actinomycetales	201174|Actinobacteria	U	Psort location CytoplasmicMembrane, score	-	-	-	ko:K12510	-	-	-	-	ko00000,ko02044	-	-	-	T2SSF
2012CQ_ZSH_02180	644284.Arch_1714	5.71e-40	141.0	COG4965@1|root,COG4965@2|Bacteria,2GQ2Z@201174|Actinobacteria,4D52S@85005|Actinomycetales	201174|Actinobacteria	U	Psort location CytoplasmicMembrane, score	-	-	-	ko:K12510	-	-	-	-	ko00000,ko02044	-	-	-	T2SSF
Arash114_08435	644284.Arch_1714	5.71e-40	141.0	COG4965@1|root,COG4965@2|Bacteria,2GQ2Z@201174|Actinobacteria,4D52S@85005|Actinomycetales	201174|Actinobacteria	U	Psort location CytoplasmicMembrane, score	-	-	-	ko:K12510	-	-	-	-	ko00000,ko02044	-	-	-	T2SSF
Bu5_06880	644284.Arch_1714	1.42e-40	142.0	COG4965@1|root,COG4965@2|Bacteria,2GQ2Z@201174|Actinobacteria,4D52S@85005|Actinomycetales	201174|Actinobacteria	U	Psort location CytoplasmicMembrane, score	-	-	-	ko:K12510	-	-	-	-	ko00000,ko02044	-	-	-	T2SSF
DSM_20630_06260	644284.Arch_1714	5.71e-40	141.0	COG4965@1|root,COG4965@2|Bacteria,2GQ2Z@201174|Actinobacteria,4D52S@85005|Actinomycetales	201174|Actinobacteria	U	Psort location CytoplasmicMembrane, score	-	-	-	ko:K12510	-	-	-	-	ko00000,ko02044	-	-	-	T2SSF
MS249_05375	644284.Arch_1714	5.71e-40	141.0	COG4965@1|root,COG4965@2|Bacteria,2GQ2Z@201174|Actinobacteria,4D52S@85005|Actinomycetales	201174|Actinobacteria	U	Psort location CytoplasmicMembrane, score	-	-	-	ko:K12510	-	-	-	-	ko00000,ko02044	-	-	-	T2SSF
NCTC5224_09405	644284.Arch_1714	5.71e-40	141.0	COG4965@1|root,COG4965@2|Bacteria,2GQ2Z@201174|Actinobacteria,4D52S@85005|Actinomycetales	201174|Actinobacteria	U	Psort location CytoplasmicMembrane, score	-	-	-	ko:K12510	-	-	-	-	ko00000,ko02044	-	-	-	T2SSF
SH01_05495	644284.Arch_1714	8.09e-40	140.0	COG4965@1|root,COG4965@2|Bacteria,2GQ2Z@201174|Actinobacteria,4D52S@85005|Actinomycetales	201174|Actinobacteria	U	Psort location CytoplasmicMembrane, score	-	-	-	ko:K12510	-	-	-	-	ko00000,ko02044	-	-	-	T2SSF
SH02_08940	644284.Arch_1714	1.14e-39	140.0	COG4965@1|root,COG4965@2|Bacteria,2GQ2Z@201174|Actinobacteria,4D52S@85005|Actinomycetales	201174|Actinobacteria	U	Psort location CytoplasmicMembrane, score	-	-	-	ko:K12510	-	-	-	-	ko00000,ko02044	-	-	-	T2SSF
SH03_04695	644284.Arch_1714	1.14e-39	140.0	COG4965@1|root,COG4965@2|Bacteria,2GQ2Z@201174|Actinobacteria,4D52S@85005|Actinomycetales	201174|Actinobacteria	U	Psort location CytoplasmicMembrane, score	-	-	-	ko:K12510	-	-	-	-	ko00000,ko02044	-	-	-	T2SSF
TP1_09410	644284.Arch_1714	1.14e-39	140.0	COG4965@1|root,COG4965@2|Bacteria,2GQ2Z@201174|Actinobacteria,4D52S@85005|Actinomycetales	201174|Actinobacteria	U	Psort location CytoplasmicMembrane, score	-	-	-	ko:K12510	-	-	-	-	ko00000,ko02044	-	-	-	T2SSF
TP2_05075	644284.Arch_1714	5.71e-40	141.0	COG4965@1|root,COG4965@2|Bacteria,2GQ2Z@201174|Actinobacteria,4D52S@85005|Actinomycetales	201174|Actinobacteria	U	Psort location CytoplasmicMembrane, score	-	-	-	ko:K12510	-	-	-	-	ko00000,ko02044	-	-	-	T2SSF
TP3_07950	644284.Arch_1714	8.09e-40	140.0	COG4965@1|root,COG4965@2|Bacteria,2GQ2Z@201174|Actinobacteria,4D52S@85005|Actinomycetales	201174|Actinobacteria	U	Psort location CytoplasmicMembrane, score	-	-	-	ko:K12510	-	-	-	-	ko00000,ko02044	-	-	-	T2SSF
TP4_07895	644284.Arch_1714	8.09e-40	140.0	COG4965@1|root,COG4965@2|Bacteria,2GQ2Z@201174|Actinobacteria,4D52S@85005|Actinomycetales	201174|Actinobacteria	U	Psort location CytoplasmicMembrane, score	-	-	-	ko:K12510	-	-	-	-	ko00000,ko02044	-	-	-	T2SSF
TP4479_03430	644284.Arch_1714	8.09e-40	140.0	COG4965@1|root,COG4965@2|Bacteria,2GQ2Z@201174|Actinobacteria,4D52S@85005|Actinomycetales	201174|Actinobacteria	U	Psort location CytoplasmicMembrane, score	-	-	-	ko:K12510	-	-	-	-	ko00000,ko02044	-	-	-	T2SSF
TP8_09905	644284.Arch_1714	2.61e-38	137.0	COG4965@1|root,COG4965@2|Bacteria,2GQ2Z@201174|Actinobacteria,4D52S@85005|Actinomycetales	201174|Actinobacteria	U	Psort location CytoplasmicMembrane, score	-	-	-	ko:K12510	-	-	-	-	ko00000,ko02044	-	-	-	T2SSF
TP_2849_05365	644284.Arch_1714	8.09e-40	140.0	COG4965@1|root,COG4965@2|Bacteria,2GQ2Z@201174|Actinobacteria,4D52S@85005|Actinomycetales	201174|Actinobacteria	U	Psort location CytoplasmicMembrane, score	-	-	-	ko:K12510	-	-	-	-	ko00000,ko02044	-	-	-	T2SSF
UFV1_06770	644284.Arch_1714	7.1e-41	143.0	COG4965@1|root,COG4965@2|Bacteria,2GQ2Z@201174|Actinobacteria,4D52S@85005|Actinomycetales	201174|Actinobacteria	U	Psort location CytoplasmicMembrane, score	-	-	-	ko:K12510	-	-	-	-	ko00000,ko02044	-	-	-	T2SSF
jx18_10040	644284.Arch_1714	5.71e-40	141.0	COG4965@1|root,COG4965@2|Bacteria,2GQ2Z@201174|Actinobacteria,4D52S@85005|Actinomycetales	201174|Actinobacteria	U	Psort location CytoplasmicMembrane, score	-	-	-	ko:K12510	-	-	-	-	ko00000,ko02044	-	-	-	T2SSF
TP6375_01065	649743.HMPREF0972_02092	5.46e-235	657.0	COG3200@1|root,COG3200@2|Bacteria,2GJBX@201174|Actinobacteria,4D36A@85005|Actinomycetales	201174|Actinobacteria	E	Belongs to the class-II DAHP synthase family	aroG	GO:0003674,GO:0003824,GO:0003849,GO:0005488,GO:0005575,GO:0005618,GO:0005622,GO:0005623,GO:0005737,GO:0005829,GO:0005886,GO:0006082,GO:0008150,GO:0008152,GO:0009058,GO:0009423,GO:0009987,GO:0016020,GO:0016043,GO:0016053,GO:0016740,GO:0016765,GO:0019752,GO:0022607,GO:0030145,GO:0030312,GO:0040007,GO:0043167,GO:0043169,GO:0043436,GO:0043648,GO:0043650,GO:0043933,GO:0044085,GO:0044237,GO:0044249,GO:…	2.5.1.54	ko:K01626,ko:K16019	ko00400,ko01051,ko01100,ko01110,ko01130,ko01230,ko02024,map00400,map01051,map01100,map01110,map01130,map01230,map02024	M00022	R01826,R06591	RC00435,RC01556	ko00000,ko00001,ko00002,ko01000	-	-	iNJ661.Rv2178c	DAHP_synth_2
2012CQ_ZSH_08780	649743.HMPREF0972_02092	1.34e-235	658.0	COG3200@1|root,COG3200@2|Bacteria,2GJBX@201174|Actinobacteria,4D36A@85005|Actinomycetales	201174|Actinobacteria	E	Belongs to the class-II DAHP synthase family	aroG	GO:0003674,GO:0003824,GO:0003849,GO:0005488,GO:0005575,GO:0005618,GO:0005622,GO:0005623,GO:0005737,GO:0005829,GO:0005886,GO:0006082,GO:0008150,GO:0008152,GO:0009058,GO:0009423,GO:0009987,GO:0016020,GO:0016043,GO:0016053,GO:0016740,GO:0016765,GO:0019752,GO:0022607,GO:0030145,GO:0030312,GO:0040007,GO:0043167,GO:0043169,GO:0043436,GO:0043648,GO:0043650,GO:0043933,GO:0044085,GO:0044237,GO:0044249,GO:…	2.5.1.54	ko:K01626,ko:K16019	ko00400,ko01051,ko01100,ko01110,ko01130,ko01230,ko02024,map00400,map01051,map01100,map01110,map01130,map01230,map02024	M00022	R01826,R06591	RC00435,RC01556	ko00000,ko00001,ko00002,ko01000	-	-	iNJ661.Rv2178c	DAHP_synth_2
Arash114_01065	649743.HMPREF0972_02092	2.57e-233	652.0	COG3200@1|root,COG3200@2|Bacteria,2GJBX@201174|Actinobacteria,4D36A@85005|Actinomycetales	201174|Actinobacteria	E	Belongs to the class-II DAHP synthase family	aroG	GO:0003674,GO:0003824,GO:0003849,GO:0005488,GO:0005575,GO:0005618,GO:0005622,GO:0005623,GO:0005737,GO:0005829,GO:0005886,GO:0006082,GO:0008150,GO:0008152,GO:0009058,GO:0009423,GO:0009987,GO:0016020,GO:0016043,GO:0016053,GO:0016740,GO:0016765,GO:0019752,GO:0022607,GO:0030145,GO:0030312,GO:0040007,GO:0043167,GO:0043169,GO:0043436,GO:0043648,GO:0043650,GO:0043933,GO:0044085,GO:0044237,GO:0044249,GO:…	2.5.1.54	ko:K01626,ko:K16019	ko00400,ko01051,ko01100,ko01110,ko01130,ko01230,ko02024,map00400,map01051,map01100,map01110,map01130,map01230,map02024	M00022	R01826,R06591	RC00435,RC01556	ko00000,ko00001,ko00002,ko01000	-	-	iNJ661.Rv2178c	DAHP_synth_2
Bu5_04755	649743.HMPREF0972_02092	3.65e-233	652.0	COG3200@1|root,COG3200@2|Bacteria,2GJBX@201174|Actinobacteria,4D36A@85005|Actinomycetales	201174|Actinobacteria	E	Belongs to the class-II DAHP synthase family	aroG	GO:0003674,GO:0003824,GO:0003849,GO:0005488,GO:0005575,GO:0005618,GO:0005622,GO:0005623,GO:0005737,GO:0005829,GO:0005886,GO:0006082,GO:0008150,GO:0008152,GO:0009058,GO:0009423,GO:0009987,GO:0016020,GO:0016043,GO:0016053,GO:0016740,GO:0016765,GO:0019752,GO:0022607,GO:0030145,GO:0030312,GO:0040007,GO:0043167,GO:0043169,GO:0043436,GO:0043648,GO:0043650,GO:0043933,GO:0044085,GO:0044237,GO:0044249,GO:…	2.5.1.54	ko:K01626,ko:K16019	ko00400,ko01051,ko01100,ko01110,ko01130,ko01230,ko02024,map00400,map01051,map01100,map01110,map01130,map01230,map02024	M00022	R01826,R06591	RC00435,RC01556	ko00000,ko00001,ko00002,ko01000	-	-	iNJ661.Rv2178c	DAHP_synth_2
DSM_20630_03350	649743.HMPREF0972_02092	7.75e-235	656.0	COG3200@1|root,COG3200@2|Bacteria,2GJBX@201174|Actinobacteria,4D36A@85005|Actinomycetales	201174|Actinobacteria	E	Belongs to the class-II DAHP synthase family	aroG	GO:0003674,GO:0003824,GO:0003849,GO:0005488,GO:0005575,GO:0005618,GO:0005622,GO:0005623,GO:0005737,GO:0005829,GO:0005886,GO:0006082,GO:0008150,GO:0008152,GO:0009058,GO:0009423,GO:0009987,GO:0016020,GO:0016043,GO:0016053,GO:0016740,GO:0016765,GO:0019752,GO:0022607,GO:0030145,GO:0030312,GO:0040007,GO:0043167,GO:0043169,GO:0043436,GO:0043648,GO:0043650,GO:0043933,GO:0044085,GO:0044237,GO:0044249,GO:…	2.5.1.54	ko:K01626,ko:K16019	ko00400,ko01051,ko01100,ko01110,ko01130,ko01230,ko02024,map00400,map01051,map01100,map01110,map01130,map01230,map02024	M00022	R01826,R06591	RC00435,RC01556	ko00000,ko00001,ko00002,ko01000	-	-	iNJ661.Rv2178c	DAHP_synth_2
MS249_06565	649743.HMPREF0972_02092	3.65e-233	652.0	COG3200@1|root,COG3200@2|Bacteria,2GJBX@201174|Actinobacteria,4D36A@85005|Actinomycetales	201174|Actinobacteria	E	Belongs to the class-II DAHP synthase family	aroG	GO:0003674,GO:0003824,GO:0003849,GO:0005488,GO:0005575,GO:0005618,GO:0005622,GO:0005623,GO:0005737,GO:0005829,GO:0005886,GO:0006082,GO:0008150,GO:0008152,GO:0009058,GO:0009423,GO:0009987,GO:0016020,GO:0016043,GO:0016053,GO:0016740,GO:0016765,GO:0019752,GO:0022607,GO:0030145,GO:0030312,GO:0040007,GO:0043167,GO:0043169,GO:0043436,GO:0043648,GO:0043650,GO:0043933,GO:0044085,GO:0044237,GO:0044249,GO:…	2.5.1.54	ko:K01626,ko:K16019	ko00400,ko01051,ko01100,ko01110,ko01130,ko01230,ko02024,map00400,map01051,map01100,map01110,map01130,map01230,map02024	M00022	R01826,R06591	RC00435,RC01556	ko00000,ko00001,ko00002,ko01000	-	-	iNJ661.Rv2178c	DAHP_synth_2
NCTC5224_05745	649743.HMPREF0972_02092	7.75e-235	656.0	COG3200@1|root,COG3200@2|Bacteria,2GJBX@201174|Actinobacteria,4D36A@85005|Actinomycetales	201174|Actinobacteria	E	Belongs to the class-II DAHP synthase family	aroG	GO:0003674,GO:0003824,GO:0003849,GO:0005488,GO:0005575,GO:0005618,GO:0005622,GO:0005623,GO:0005737,GO:0005829,GO:0005886,GO:0006082,GO:0008150,GO:0008152,GO:0009058,GO:0009423,GO:0009987,GO:0016020,GO:0016043,GO:0016053,GO:0016740,GO:0016765,GO:0019752,GO:0022607,GO:0030145,GO:0030312,GO:0040007,GO:0043167,GO:0043169,GO:0043436,GO:0043648,GO:0043650,GO:0043933,GO:0044085,GO:0044237,GO:0044249,GO:…	2.5.1.54	ko:K01626,ko:K16019	ko00400,ko01051,ko01100,ko01110,ko01130,ko01230,ko02024,map00400,map01051,map01100,map01110,map01130,map01230,map02024	M00022	R01826,R06591	RC00435,RC01556	ko00000,ko00001,ko00002,ko01000	-	-	iNJ661.Rv2178c	DAHP_synth_2
SH01_10450	649743.HMPREF0972_02092	1.34e-235	658.0	COG3200@1|root,COG3200@2|Bacteria,2GJBX@201174|Actinobacteria,4D36A@85005|Actinomycetales	201174|Actinobacteria	E	Belongs to the class-II DAHP synthase family	aroG	GO:0003674,GO:0003824,GO:0003849,GO:0005488,GO:0005575,GO:0005618,GO:0005622,GO:0005623,GO:0005737,GO:0005829,GO:0005886,GO:0006082,GO:0008150,GO:0008152,GO:0009058,GO:0009423,GO:0009987,GO:0016020,GO:0016043,GO:0016053,GO:0016740,GO:0016765,GO:0019752,GO:0022607,GO:0030145,GO:0030312,GO:0040007,GO:0043167,GO:0043169,GO:0043436,GO:0043648,GO:0043650,GO:0043933,GO:0044085,GO:0044237,GO:0044249,GO:…	2.5.1.54	ko:K01626,ko:K16019	ko00400,ko01051,ko01100,ko01110,ko01130,ko01230,ko02024,map00400,map01051,map01100,map01110,map01130,map01230,map02024	M00022	R01826,R06591	RC00435,RC01556	ko00000,ko00001,ko00002,ko01000	-	-	iNJ661.Rv2178c	DAHP_synth_2
SH02_06530	649743.HMPREF0972_02092	1.91e-235	658.0	COG3200@1|root,COG3200@2|Bacteria,2GJBX@201174|Actinobacteria,4D36A@85005|Actinomycetales	201174|Actinobacteria	E	Belongs to the class-II DAHP synthase family	aroG	GO:0003674,GO:0003824,GO:0003849,GO:0005488,GO:0005575,GO:0005618,GO:0005622,GO:0005623,GO:0005737,GO:0005829,GO:0005886,GO:0006082,GO:0008150,GO:0008152,GO:0009058,GO:0009423,GO:0009987,GO:0016020,GO:0016043,GO:0016053,GO:0016740,GO:0016765,GO:0019752,GO:0022607,GO:0030145,GO:0030312,GO:0040007,GO:0043167,GO:0043169,GO:0043436,GO:0043648,GO:0043650,GO:0043933,GO:0044085,GO:0044237,GO:0044249,GO:…	2.5.1.54	ko:K01626,ko:K16019	ko00400,ko01051,ko01100,ko01110,ko01130,ko01230,ko02024,map00400,map01051,map01100,map01110,map01130,map01230,map02024	M00022	R01826,R06591	RC00435,RC01556	ko00000,ko00001,ko00002,ko01000	-	-	iNJ661.Rv2178c	DAHP_synth_2
SH03_01060	649743.HMPREF0972_02092	1.56e-234	655.0	COG3200@1|root,COG3200@2|Bacteria,2GJBX@201174|Actinobacteria,4D36A@85005|Actinomycetales	201174|Actinobacteria	E	Belongs to the class-II DAHP synthase family	aroG	GO:0003674,GO:0003824,GO:0003849,GO:0005488,GO:0005575,GO:0005618,GO:0005622,GO:0005623,GO:0005737,GO:0005829,GO:0005886,GO:0006082,GO:0008150,GO:0008152,GO:0009058,GO:0009423,GO:0009987,GO:0016020,GO:0016043,GO:0016053,GO:0016740,GO:0016765,GO:0019752,GO:0022607,GO:0030145,GO:0030312,GO:0040007,GO:0043167,GO:0043169,GO:0043436,GO:0043648,GO:0043650,GO:0043933,GO:0044085,GO:0044237,GO:0044249,GO:…	2.5.1.54	ko:K01626,ko:K16019	ko00400,ko01051,ko01100,ko01110,ko01130,ko01230,ko02024,map00400,map01051,map01100,map01110,map01130,map01230,map02024	M00022	R01826,R06591	RC00435,RC01556	ko00000,ko00001,ko00002,ko01000	-	-	iNJ661.Rv2178c	DAHP_synth_2
TP1_02815	649743.HMPREF0972_02092	5.46e-235	657.0	COG3200@1|root,COG3200@2|Bacteria,2GJBX@201174|Actinobacteria,4D36A@85005|Actinomycetales	201174|Actinobacteria	E	Belongs to the class-II DAHP synthase family	aroG	GO:0003674,GO:0003824,GO:0003849,GO:0005488,GO:0005575,GO:0005618,GO:0005622,GO:0005623,GO:0005737,GO:0005829,GO:0005886,GO:0006082,GO:0008150,GO:0008152,GO:0009058,GO:0009423,GO:0009987,GO:0016020,GO:0016043,GO:0016053,GO:0016740,GO:0016765,GO:0019752,GO:0022607,GO:0030145,GO:0030312,GO:0040007,GO:0043167,GO:0043169,GO:0043436,GO:0043648,GO:0043650,GO:0043933,GO:0044085,GO:0044237,GO:0044249,GO:…	2.5.1.54	ko:K01626,ko:K16019	ko00400,ko01051,ko01100,ko01110,ko01130,ko01230,ko02024,map00400,map01051,map01100,map01110,map01130,map01230,map02024	M00022	R01826,R06591	RC00435,RC01556	ko00000,ko00001,ko00002,ko01000	-	-	iNJ661.Rv2178c	DAHP_synth_2
TP2_08790	649743.HMPREF0972_02092	5.46e-235	657.0	COG3200@1|root,COG3200@2|Bacteria,2GJBX@201174|Actinobacteria,4D36A@85005|Actinomycetales	201174|Actinobacteria	E	Belongs to the class-II DAHP synthase family	aroG	GO:0003674,GO:0003824,GO:0003849,GO:0005488,GO:0005575,GO:0005618,GO:0005622,GO:0005623,GO:0005737,GO:0005829,GO:0005886,GO:0006082,GO:0008150,GO:0008152,GO:0009058,GO:0009423,GO:0009987,GO:0016020,GO:0016043,GO:0016053,GO:0016740,GO:0016765,GO:0019752,GO:0022607,GO:0030145,GO:0030312,GO:0040007,GO:0043167,GO:0043169,GO:0043436,GO:0043648,GO:0043650,GO:0043933,GO:0044085,GO:0044237,GO:0044249,GO:…	2.5.1.54	ko:K01626,ko:K16019	ko00400,ko01051,ko01100,ko01110,ko01130,ko01230,ko02024,map00400,map01051,map01100,map01110,map01130,map01230,map02024	M00022	R01826,R06591	RC00435,RC01556	ko00000,ko00001,ko00002,ko01000	-	-	iNJ661.Rv2178c	DAHP_synth_2
TP3_03885	649743.HMPREF0972_02092	1.91e-235	658.0	COG3200@1|root,COG3200@2|Bacteria,2GJBX@201174|Actinobacteria,4D36A@85005|Actinomycetales	201174|Actinobacteria	E	Belongs to the class-II DAHP synthase family	aroG	GO:0003674,GO:0003824,GO:0003849,GO:0005488,GO:0005575,GO:0005618,GO:0005622,GO:0005623,GO:0005737,GO:0005829,GO:0005886,GO:0006082,GO:0008150,GO:0008152,GO:0009058,GO:0009423,GO:0009987,GO:0016020,GO:0016043,GO:0016053,GO:0016740,GO:0016765,GO:0019752,GO:0022607,GO:0030145,GO:0030312,GO:0040007,GO:0043167,GO:0043169,GO:0043436,GO:0043648,GO:0043650,GO:0043933,GO:0044085,GO:0044237,GO:0044249,GO:…	2.5.1.54	ko:K01626,ko:K16019	ko00400,ko01051,ko01100,ko01110,ko01130,ko01230,ko02024,map00400,map01051,map01100,map01110,map01130,map01230,map02024	M00022	R01826,R06591	RC00435,RC01556	ko00000,ko00001,ko00002,ko01000	-	-	iNJ661.Rv2178c	DAHP_synth_2
TP4_00765	649743.HMPREF0972_02092	4.7e-236	659.0	COG3200@1|root,COG3200@2|Bacteria,2GJBX@201174|Actinobacteria,4D36A@85005|Actinomycetales	201174|Actinobacteria	E	Belongs to the class-II DAHP synthase family	aroG	GO:0003674,GO:0003824,GO:0003849,GO:0005488,GO:0005575,GO:0005618,GO:0005622,GO:0005623,GO:0005737,GO:0005829,GO:0005886,GO:0006082,GO:0008150,GO:0008152,GO:0009058,GO:0009423,GO:0009987,GO:0016020,GO:0016043,GO:0016053,GO:0016740,GO:0016765,GO:0019752,GO:0022607,GO:0030145,GO:0030312,GO:0040007,GO:0043167,GO:0043169,GO:0043436,GO:0043648,GO:0043650,GO:0043933,GO:0044085,GO:0044237,GO:0044249,GO:…	2.5.1.54	ko:K01626,ko:K16019	ko00400,ko01051,ko01100,ko01110,ko01130,ko01230,ko02024,map00400,map01051,map01100,map01110,map01130,map01230,map02024	M00022	R01826,R06591	RC00435,RC01556	ko00000,ko00001,ko00002,ko01000	-	-	iNJ661.Rv2178c	DAHP_synth_2
TP4479_10230	649743.HMPREF0972_02092	1.91e-235	658.0	COG3200@1|root,COG3200@2|Bacteria,2GJBX@201174|Actinobacteria,4D36A@85005|Actinomycetales	201174|Actinobacteria	E	Belongs to the class-II DAHP synthase family	aroG	GO:0003674,GO:0003824,GO:0003849,GO:0005488,GO:0005575,GO:0005618,GO:0005622,GO:0005623,GO:0005737,GO:0005829,GO:0005886,GO:0006082,GO:0008150,GO:0008152,GO:0009058,GO:0009423,GO:0009987,GO:0016020,GO:0016043,GO:0016053,GO:0016740,GO:0016765,GO:0019752,GO:0022607,GO:0030145,GO:0030312,GO:0040007,GO:0043167,GO:0043169,GO:0043436,GO:0043648,GO:0043650,GO:0043933,GO:0044085,GO:0044237,GO:0044249,GO:…	2.5.1.54	ko:K01626,ko:K16019	ko00400,ko01051,ko01100,ko01110,ko01130,ko01230,ko02024,map00400,map01051,map01100,map01110,map01130,map01230,map02024	M00022	R01826,R06591	RC00435,RC01556	ko00000,ko00001,ko00002,ko01000	-	-	iNJ661.Rv2178c	DAHP_synth_2
TP8_06260	649743.HMPREF0972_02092	1.34e-235	658.0	COG3200@1|root,COG3200@2|Bacteria,2GJBX@201174|Actinobacteria,4D36A@85005|Actinomycetales	201174|Actinobacteria	E	Belongs to the class-II DAHP synthase family	aroG	GO:0003674,GO:0003824,GO:0003849,GO:0005488,GO:0005575,GO:0005618,GO:0005622,GO:0005623,GO:0005737,GO:0005829,GO:0005886,GO:0006082,GO:0008150,GO:0008152,GO:0009058,GO:0009423,GO:0009987,GO:0016020,GO:0016043,GO:0016053,GO:0016740,GO:0016765,GO:0019752,GO:0022607,GO:0030145,GO:0030312,GO:0040007,GO:0043167,GO:0043169,GO:0043436,GO:0043648,GO:0043650,GO:0043933,GO:0044085,GO:0044237,GO:0044249,GO:…	2.5.1.54	ko:K01626,ko:K16019	ko00400,ko01051,ko01100,ko01110,ko01130,ko01230,ko02024,map00400,map01051,map01100,map01110,map01130,map01230,map02024	M00022	R01826,R06591	RC00435,RC01556	ko00000,ko00001,ko00002,ko01000	-	-	iNJ661.Rv2178c	DAHP_synth_2
TP_2849_01285	649743.HMPREF0972_02092	1.91e-235	658.0	COG3200@1|root,COG3200@2|Bacteria,2GJBX@201174|Actinobacteria,4D36A@85005|Actinomycetales	201174|Actinobacteria	E	Belongs to the class-II DAHP synthase family	aroG	GO:0003674,GO:0003824,GO:0003849,GO:0005488,GO:0005575,GO:0005618,GO:0005622,GO:0005623,GO:0005737,GO:0005829,GO:0005886,GO:0006082,GO:0008150,GO:0008152,GO:0009058,GO:0009423,GO:0009987,GO:0016020,GO:0016043,GO:0016053,GO:0016740,GO:0016765,GO:0019752,GO:0022607,GO:0030145,GO:0030312,GO:0040007,GO:0043167,GO:0043169,GO:0043436,GO:0043648,GO:0043650,GO:0043933,GO:0044085,GO:0044237,GO:0044249,GO:…	2.5.1.54	ko:K01626,ko:K16019	ko00400,ko01051,ko01100,ko01110,ko01130,ko01230,ko02024,map00400,map01051,map01100,map01110,map01130,map01230,map02024	M00022	R01826,R06591	RC00435,RC01556	ko00000,ko00001,ko00002,ko01000	-	-	iNJ661.Rv2178c	DAHP_synth_2
UFV1_02460	649743.HMPREF0972_02092	5.46e-235	657.0	COG3200@1|root,COG3200@2|Bacteria,2GJBX@201174|Actinobacteria,4D36A@85005|Actinomycetales	201174|Actinobacteria	E	Belongs to the class-II DAHP synthase family	aroG	GO:0003674,GO:0003824,GO:0003849,GO:0005488,GO:0005575,GO:0005618,GO:0005622,GO:0005623,GO:0005737,GO:0005829,GO:0005886,GO:0006082,GO:0008150,GO:0008152,GO:0009058,GO:0009423,GO:0009987,GO:0016020,GO:0016043,GO:0016053,GO:0016740,GO:0016765,GO:0019752,GO:0022607,GO:0030145,GO:0030312,GO:0040007,GO:0043167,GO:0043169,GO:0043436,GO:0043648,GO:0043650,GO:0043933,GO:0044085,GO:0044237,GO:0044249,GO:…	2.5.1.54	ko:K01626,ko:K16019	ko00400,ko01051,ko01100,ko01110,ko01130,ko01230,ko02024,map00400,map01051,map01100,map01110,map01130,map01230,map02024	M00022	R01826,R06591	RC00435,RC01556	ko00000,ko00001,ko00002,ko01000	-	-	iNJ661.Rv2178c	DAHP_synth_2
jx18_02545	649743.HMPREF0972_02092	1.34e-235	658.0	COG3200@1|root,COG3200@2|Bacteria,2GJBX@201174|Actinobacteria,4D36A@85005|Actinomycetales	201174|Actinobacteria	E	Belongs to the class-II DAHP synthase family	aroG	GO:0003674,GO:0003824,GO:0003849,GO:0005488,GO:0005575,GO:0005618,GO:0005622,GO:0005623,GO:0005737,GO:0005829,GO:0005886,GO:0006082,GO:0008150,GO:0008152,GO:0009058,GO:0009423,GO:0009987,GO:0016020,GO:0016043,GO:0016053,GO:0016740,GO:0016765,GO:0019752,GO:0022607,GO:0030145,GO:0030312,GO:0040007,GO:0043167,GO:0043169,GO:0043436,GO:0043648,GO:0043650,GO:0043933,GO:0044085,GO:0044237,GO:0044249,GO:…	2.5.1.54	ko:K01626,ko:K16019	ko00400,ko01051,ko01100,ko01110,ko01130,ko01230,ko02024,map00400,map01051,map01100,map01110,map01130,map01230,map02024	M00022	R01826,R06591	RC00435,RC01556	ko00000,ko00001,ko00002,ko01000	-	-	iNJ661.Rv2178c	DAHP_synth_2
TP6375_04915	883066.HMPREF9233_01247	1.47e-30	107.0	COG0267@1|root,COG0267@2|Bacteria,2GQFG@201174|Actinobacteria,4D6F6@85005|Actinomycetales	201174|Actinobacteria	J	Belongs to the bacterial ribosomal protein bL33 family	rpmG	-	-	ko:K02913	ko03010,map03010	M00178	-	-	br01610,ko00000,ko00001,ko00002,ko03011	-	-	-	Ribosomal_L33
2012CQ_ZSH_05600	883066.HMPREF9233_01247	1.47e-30	107.0	COG0267@1|root,COG0267@2|Bacteria,2GQFG@201174|Actinobacteria,4D6F6@85005|Actinomycetales	201174|Actinobacteria	J	Belongs to the bacterial ribosomal protein bL33 family	rpmG	-	-	ko:K02913	ko03010,map03010	M00178	-	-	br01610,ko00000,ko00001,ko00002,ko03011	-	-	-	Ribosomal_L33
Arash114_04915	883066.HMPREF9233_01247	1.47e-30	107.0	COG0267@1|root,COG0267@2|Bacteria,2GQFG@201174|Actinobacteria,4D6F6@85005|Actinomycetales	201174|Actinobacteria	J	Belongs to the bacterial ribosomal protein bL33 family	rpmG	-	-	ko:K02913	ko03010,map03010	M00178	-	-	br01610,ko00000,ko00001,ko00002,ko03011	-	-	-	Ribosomal_L33
Bu5_01480	883066.HMPREF9233_01247	1.47e-30	107.0	COG0267@1|root,COG0267@2|Bacteria,2GQFG@201174|Actinobacteria,4D6F6@85005|Actinomycetales	201174|Actinobacteria	J	Belongs to the bacterial ribosomal protein bL33 family	rpmG	-	-	ko:K02913	ko03010,map03010	M00178	-	-	br01610,ko00000,ko00001,ko00002,ko03011	-	-	-	Ribosomal_L33
DSM_20630_00185	883066.HMPREF9233_01247	1.47e-30	107.0	COG0267@1|root,COG0267@2|Bacteria,2GQFG@201174|Actinobacteria,4D6F6@85005|Actinomycetales	201174|Actinobacteria	J	Belongs to the bacterial ribosomal protein bL33 family	rpmG	-	-	ko:K02913	ko03010,map03010	M00178	-	-	br01610,ko00000,ko00001,ko00002,ko03011	-	-	-	Ribosomal_L33
MS249_02105	883066.HMPREF9233_01247	1.47e-30	107.0	COG0267@1|root,COG0267@2|Bacteria,2GQFG@201174|Actinobacteria,4D6F6@85005|Actinomycetales	201174|Actinobacteria	J	Belongs to the bacterial ribosomal protein bL33 family	rpmG	-	-	ko:K02913	ko03010,map03010	M00178	-	-	br01610,ko00000,ko00001,ko00002,ko03011	-	-	-	Ribosomal_L33
NCTC5224_02585	883066.HMPREF9233_01247	1.47e-30	107.0	COG0267@1|root,COG0267@2|Bacteria,2GQFG@201174|Actinobacteria,4D6F6@85005|Actinomycetales	201174|Actinobacteria	J	Belongs to the bacterial ribosomal protein bL33 family	rpmG	-	-	ko:K02913	ko03010,map03010	M00178	-	-	br01610,ko00000,ko00001,ko00002,ko03011	-	-	-	Ribosomal_L33
SH01_01460	883066.HMPREF9233_01247	1.47e-30	107.0	COG0267@1|root,COG0267@2|Bacteria,2GQFG@201174|Actinobacteria,4D6F6@85005|Actinomycetales	201174|Actinobacteria	J	Belongs to the bacterial ribosomal protein bL33 family	rpmG	-	-	ko:K02913	ko03010,map03010	M00178	-	-	br01610,ko00000,ko00001,ko00002,ko03011	-	-	-	Ribosomal_L33
SH02_00350	883066.HMPREF9233_01247	1.47e-30	107.0	COG0267@1|root,COG0267@2|Bacteria,2GQFG@201174|Actinobacteria,4D6F6@85005|Actinomycetales	201174|Actinobacteria	J	Belongs to the bacterial ribosomal protein bL33 family	rpmG	-	-	ko:K02913	ko03010,map03010	M00178	-	-	br01610,ko00000,ko00001,ko00002,ko03011	-	-	-	Ribosomal_L33
SH03_07320	883066.HMPREF9233_01247	1.47e-30	107.0	COG0267@1|root,COG0267@2|Bacteria,2GQFG@201174|Actinobacteria,4D6F6@85005|Actinomycetales	201174|Actinobacteria	J	Belongs to the bacterial ribosomal protein bL33 family	rpmG	-	-	ko:K02913	ko03010,map03010	M00178	-	-	br01610,ko00000,ko00001,ko00002,ko03011	-	-	-	Ribosomal_L33
TP1_05970	883066.HMPREF9233_01247	1.47e-30	107.0	COG0267@1|root,COG0267@2|Bacteria,2GQFG@201174|Actinobacteria,4D6F6@85005|Actinomycetales	201174|Actinobacteria	J	Belongs to the bacterial ribosomal protein bL33 family	rpmG	-	-	ko:K02913	ko03010,map03010	M00178	-	-	br01610,ko00000,ko00001,ko00002,ko03011	-	-	-	Ribosomal_L33
TP2_01550	883066.HMPREF9233_01247	1.47e-30	107.0	COG0267@1|root,COG0267@2|Bacteria,2GQFG@201174|Actinobacteria,4D6F6@85005|Actinomycetales	201174|Actinobacteria	J	Belongs to the bacterial ribosomal protein bL33 family	rpmG	-	-	ko:K02913	ko03010,map03010	M00178	-	-	br01610,ko00000,ko00001,ko00002,ko03011	-	-	-	Ribosomal_L33
TP3_00550	883066.HMPREF9233_01247	1.47e-30	107.0	COG0267@1|root,COG0267@2|Bacteria,2GQFG@201174|Actinobacteria,4D6F6@85005|Actinomycetales	201174|Actinobacteria	J	Belongs to the bacterial ribosomal protein bL33 family	rpmG	-	-	ko:K02913	ko03010,map03010	M00178	-	-	br01610,ko00000,ko00001,ko00002,ko03011	-	-	-	Ribosomal_L33
TP4_04445	883066.HMPREF9233_01247	1.47e-30	107.0	COG0267@1|root,COG0267@2|Bacteria,2GQFG@201174|Actinobacteria,4D6F6@85005|Actinomycetales	201174|Actinobacteria	J	Belongs to the bacterial ribosomal protein bL33 family	rpmG	-	-	ko:K02913	ko03010,map03010	M00178	-	-	br01610,ko00000,ko00001,ko00002,ko03011	-	-	-	Ribosomal_L33
TP4479_06900	883066.HMPREF9233_01247	1.47e-30	107.0	COG0267@1|root,COG0267@2|Bacteria,2GQFG@201174|Actinobacteria,4D6F6@85005|Actinomycetales	201174|Actinobacteria	J	Belongs to the bacterial ribosomal protein bL33 family	rpmG	-	-	ko:K02913	ko03010,map03010	M00178	-	-	br01610,ko00000,ko00001,ko00002,ko03011	-	-	-	Ribosomal_L33
TP8_02835	883066.HMPREF9233_01247	1.47e-30	107.0	COG0267@1|root,COG0267@2|Bacteria,2GQFG@201174|Actinobacteria,4D6F6@85005|Actinomycetales	201174|Actinobacteria	J	Belongs to the bacterial ribosomal protein bL33 family	rpmG	-	-	ko:K02913	ko03010,map03010	M00178	-	-	br01610,ko00000,ko00001,ko00002,ko03011	-	-	-	Ribosomal_L33
TP_2849_08835	883066.HMPREF9233_01247	1.47e-30	107.0	COG0267@1|root,COG0267@2|Bacteria,2GQFG@201174|Actinobacteria,4D6F6@85005|Actinomycetales	201174|Actinobacteria	J	Belongs to the bacterial ribosomal protein bL33 family	rpmG	-	-	ko:K02913	ko03010,map03010	M00178	-	-	br01610,ko00000,ko00001,ko00002,ko03011	-	-	-	Ribosomal_L33
UFV1_01210	883066.HMPREF9233_01247	1.47e-30	107.0	COG0267@1|root,COG0267@2|Bacteria,2GQFG@201174|Actinobacteria,4D6F6@85005|Actinomycetales	201174|Actinobacteria	J	Belongs to the bacterial ribosomal protein bL33 family	rpmG	-	-	ko:K02913	ko03010,map03010	M00178	-	-	br01610,ko00000,ko00001,ko00002,ko03011	-	-	-	Ribosomal_L33
jx18_06115	883066.HMPREF9233_01247	1.47e-30	107.0	COG0267@1|root,COG0267@2|Bacteria,2GQFG@201174|Actinobacteria,4D6F6@85005|Actinomycetales	201174|Actinobacteria	J	Belongs to the bacterial ribosomal protein bL33 family	rpmG	-	-	ko:K02913	ko03010,map03010	M00178	-	-	br01610,ko00000,ko00001,ko00002,ko03011	-	-	-	Ribosomal_L33
TP6375_10550	644284.Arch_0388	0.0	1261.0	COG0058@1|root,COG0058@2|Bacteria,2GIVZ@201174|Actinobacteria,4D43J@85005|Actinomycetales	201174|Actinobacteria	G	Phosphorylase is an important allosteric enzyme in carbohydrate metabolism. Enzymes from different sources differ in their regulatory mechanisms and in their natural substrates. However, all known phosphorylases share catalytic and structural properties	glgP	-	2.4.1.1	ko:K00688	ko00500,ko01100,ko01110,ko02026,ko04217,ko04910,ko04922,ko04931,map00500,map01100,map01110,map02026,map04217,map04910,map04922,map04931	-	R02111	-	ko00000,ko00001,ko01000	-	GT35	-	Phosphorylase
2012CQ_ZSH_00230	644284.Arch_0388	0.0	1262.0	COG0058@1|root,COG0058@2|Bacteria,2GIVZ@201174|Actinobacteria,4D43J@85005|Actinomycetales	201174|Actinobacteria	G	Phosphorylase is an important allosteric enzyme in carbohydrate metabolism. Enzymes from different sources differ in their regulatory mechanisms and in their natural substrates. However, all known phosphorylases share catalytic and structural properties	glgP	-	2.4.1.1	ko:K00688	ko00500,ko01100,ko01110,ko02026,ko04217,ko04910,ko04922,ko04931,map00500,map01100,map01110,map02026,map04217,map04910,map04922,map04931	-	R02111	-	ko00000,ko00001,ko01000	-	GT35	-	Phosphorylase
Arash114_10595	644284.Arch_0388	0.0	1261.0	COG0058@1|root,COG0058@2|Bacteria,2GIVZ@201174|Actinobacteria,4D43J@85005|Actinomycetales	201174|Actinobacteria	G	Phosphorylase is an important allosteric enzyme in carbohydrate metabolism. Enzymes from different sources differ in their regulatory mechanisms and in their natural substrates. However, all known phosphorylases share catalytic and structural properties	glgP	-	2.4.1.1	ko:K00688	ko00500,ko01100,ko01110,ko02026,ko04217,ko04910,ko04922,ko04931,map00500,map01100,map01110,map02026,map04217,map04910,map04922,map04931	-	R02111	-	ko00000,ko00001,ko01000	-	GT35	-	Phosphorylase
Bu5_08155	1219585.HMPREF1631_01750	0.0	1254.0	COG0058@1|root,COG0058@2|Bacteria,2GIVZ@201174|Actinobacteria,4D43J@85005|Actinomycetales	201174|Actinobacteria	G	Phosphorylase is an important allosteric enzyme in carbohydrate metabolism. Enzymes from different sources differ in their regulatory mechanisms and in their natural substrates. However, all known phosphorylases share catalytic and structural properties	glgP	-	2.4.1.1	ko:K00688	ko00500,ko01100,ko01110,ko02026,ko04217,ko04910,ko04922,ko04931,map00500,map01100,map01110,map02026,map04217,map04910,map04922,map04931	-	R02111	-	ko00000,ko00001,ko01000	-	GT35	-	Phosphorylase
DSM_20630_04115	644284.Arch_0388	0.0	1262.0	COG0058@1|root,COG0058@2|Bacteria,2GIVZ@201174|Actinobacteria,4D43J@85005|Actinomycetales	201174|Actinobacteria	G	Phosphorylase is an important allosteric enzyme in carbohydrate metabolism. Enzymes from different sources differ in their regulatory mechanisms and in their natural substrates. However, all known phosphorylases share catalytic and structural properties	glgP	-	2.4.1.1	ko:K00688	ko00500,ko01100,ko01110,ko02026,ko04217,ko04910,ko04922,ko04931,map00500,map01100,map01110,map02026,map04217,map04910,map04922,map04931	-	R02111	-	ko00000,ko00001,ko01000	-	GT35	-	Phosphorylase
MS249_09170	644284.Arch_0388	0.0	1262.0	COG0058@1|root,COG0058@2|Bacteria,2GIVZ@201174|Actinobacteria,4D43J@85005|Actinomycetales	201174|Actinobacteria	G	Phosphorylase is an important allosteric enzyme in carbohydrate metabolism. Enzymes from different sources differ in their regulatory mechanisms and in their natural substrates. However, all known phosphorylases share catalytic and structural properties	glgP	-	2.4.1.1	ko:K00688	ko00500,ko01100,ko01110,ko02026,ko04217,ko04910,ko04922,ko04931,map00500,map01100,map01110,map02026,map04217,map04910,map04922,map04931	-	R02111	-	ko00000,ko00001,ko01000	-	GT35	-	Phosphorylase
NCTC5224_07320	644284.Arch_0388	0.0	1262.0	COG0058@1|root,COG0058@2|Bacteria,2GIVZ@201174|Actinobacteria,4D43J@85005|Actinomycetales	201174|Actinobacteria	G	Phosphorylase is an important allosteric enzyme in carbohydrate metabolism. Enzymes from different sources differ in their regulatory mechanisms and in their natural substrates. However, all known phosphorylases share catalytic and structural properties	glgP	-	2.4.1.1	ko:K00688	ko00500,ko01100,ko01110,ko02026,ko04217,ko04910,ko04922,ko04931,map00500,map01100,map01110,map02026,map04217,map04910,map04922,map04931	-	R02111	-	ko00000,ko00001,ko01000	-	GT35	-	Phosphorylase
SH01_03045	644284.Arch_0388	0.0	1261.0	COG0058@1|root,COG0058@2|Bacteria,2GIVZ@201174|Actinobacteria,4D43J@85005|Actinomycetales	201174|Actinobacteria	G	Phosphorylase is an important allosteric enzyme in carbohydrate metabolism. Enzymes from different sources differ in their regulatory mechanisms and in their natural substrates. However, all known phosphorylases share catalytic and structural properties	glgP	-	2.4.1.1	ko:K00688	ko00500,ko01100,ko01110,ko02026,ko04217,ko04910,ko04922,ko04931,map00500,map01100,map01110,map02026,map04217,map04910,map04922,map04931	-	R02111	-	ko00000,ko00001,ko01000	-	GT35	-	Phosphorylase
SH02_09720	644284.Arch_0388	0.0	1258.0	COG0058@1|root,COG0058@2|Bacteria,2GIVZ@201174|Actinobacteria,4D43J@85005|Actinomycetales	201174|Actinobacteria	G	Phosphorylase is an important allosteric enzyme in carbohydrate metabolism. Enzymes from different sources differ in their regulatory mechanisms and in their natural substrates. However, all known phosphorylases share catalytic and structural properties	glgP	-	2.4.1.1	ko:K00688	ko00500,ko01100,ko01110,ko02026,ko04217,ko04910,ko04922,ko04931,map00500,map01100,map01110,map02026,map04217,map04910,map04922,map04931	-	R02111	-	ko00000,ko00001,ko01000	-	GT35	-	Phosphorylase
SH03_05575	644284.Arch_0388	0.0	1258.0	COG0058@1|root,COG0058@2|Bacteria,2GIVZ@201174|Actinobacteria,4D43J@85005|Actinomycetales	201174|Actinobacteria	G	Phosphorylase is an important allosteric enzyme in carbohydrate metabolism. Enzymes from different sources differ in their regulatory mechanisms and in their natural substrates. However, all known phosphorylases share catalytic and structural properties	glgP	-	2.4.1.1	ko:K00688	ko00500,ko01100,ko01110,ko02026,ko04217,ko04910,ko04922,ko04931,map00500,map01100,map01110,map02026,map04217,map04910,map04922,map04931	-	R02111	-	ko00000,ko00001,ko01000	-	GT35	-	Phosphorylase
TP1_01210	644284.Arch_0388	0.0	1261.0	COG0058@1|root,COG0058@2|Bacteria,2GIVZ@201174|Actinobacteria,4D43J@85005|Actinomycetales	201174|Actinobacteria	G	Phosphorylase is an important allosteric enzyme in carbohydrate metabolism. Enzymes from different sources differ in their regulatory mechanisms and in their natural substrates. However, all known phosphorylases share catalytic and structural properties	glgP	-	2.4.1.1	ko:K00688	ko00500,ko01100,ko01110,ko02026,ko04217,ko04910,ko04922,ko04931,map00500,map01100,map01110,map02026,map04217,map04910,map04922,map04931	-	R02111	-	ko00000,ko00001,ko01000	-	GT35	-	Phosphorylase
TP2_07095	644284.Arch_0388	0.0	1261.0	COG0058@1|root,COG0058@2|Bacteria,2GIVZ@201174|Actinobacteria,4D43J@85005|Actinomycetales	201174|Actinobacteria	G	Phosphorylase is an important allosteric enzyme in carbohydrate metabolism. Enzymes from different sources differ in their regulatory mechanisms and in their natural substrates. However, all known phosphorylases share catalytic and structural properties	glgP	-	2.4.1.1	ko:K00688	ko00500,ko01100,ko01110,ko02026,ko04217,ko04910,ko04922,ko04931,map00500,map01100,map01110,map02026,map04217,map04910,map04922,map04931	-	R02111	-	ko00000,ko00001,ko01000	-	GT35	-	Phosphorylase
TP3_05490	644284.Arch_0388	0.0	1258.0	COG0058@1|root,COG0058@2|Bacteria,2GIVZ@201174|Actinobacteria,4D43J@85005|Actinomycetales	201174|Actinobacteria	G	Phosphorylase is an important allosteric enzyme in carbohydrate metabolism. Enzymes from different sources differ in their regulatory mechanisms and in their natural substrates. However, all known phosphorylases share catalytic and structural properties	glgP	-	2.4.1.1	ko:K00688	ko00500,ko01100,ko01110,ko02026,ko04217,ko04910,ko04922,ko04931,map00500,map01100,map01110,map02026,map04217,map04910,map04922,map04931	-	R02111	-	ko00000,ko00001,ko01000	-	GT35	-	Phosphorylase
TP4_10310	644284.Arch_0388	0.0	1258.0	COG0058@1|root,COG0058@2|Bacteria,2GIVZ@201174|Actinobacteria,4D43J@85005|Actinomycetales	201174|Actinobacteria	G	Phosphorylase is an important allosteric enzyme in carbohydrate metabolism. Enzymes from different sources differ in their regulatory mechanisms and in their natural substrates. However, all known phosphorylases share catalytic and structural properties	glgP	-	2.4.1.1	ko:K00688	ko00500,ko01100,ko01110,ko02026,ko04217,ko04910,ko04922,ko04931,map00500,map01100,map01110,map02026,map04217,map04910,map04922,map04931	-	R02111	-	ko00000,ko00001,ko01000	-	GT35	-	Phosphorylase
TP4479_00970	644284.Arch_0388	0.0	1258.0	COG0058@1|root,COG0058@2|Bacteria,2GIVZ@201174|Actinobacteria,4D43J@85005|Actinomycetales	201174|Actinobacteria	G	Phosphorylase is an important allosteric enzyme in carbohydrate metabolism. Enzymes from different sources differ in their regulatory mechanisms and in their natural substrates. However, all known phosphorylases share catalytic and structural properties	glgP	-	2.4.1.1	ko:K00688	ko00500,ko01100,ko01110,ko02026,ko04217,ko04910,ko04922,ko04931,map00500,map01100,map01110,map02026,map04217,map04910,map04922,map04931	-	R02111	-	ko00000,ko00001,ko01000	-	GT35	-	Phosphorylase
TP8_07815	644284.Arch_0388	0.0	1262.0	COG0058@1|root,COG0058@2|Bacteria,2GIVZ@201174|Actinobacteria,4D43J@85005|Actinomycetales	201174|Actinobacteria	G	Phosphorylase is an important allosteric enzyme in carbohydrate metabolism. Enzymes from different sources differ in their regulatory mechanisms and in their natural substrates. However, all known phosphorylases share catalytic and structural properties	glgP	-	2.4.1.1	ko:K00688	ko00500,ko01100,ko01110,ko02026,ko04217,ko04910,ko04922,ko04931,map00500,map01100,map01110,map02026,map04217,map04910,map04922,map04931	-	R02111	-	ko00000,ko00001,ko01000	-	GT35	-	Phosphorylase
TP_2849_02895	644284.Arch_0388	0.0	1258.0	COG0058@1|root,COG0058@2|Bacteria,2GIVZ@201174|Actinobacteria,4D43J@85005|Actinomycetales	201174|Actinobacteria	G	Phosphorylase is an important allosteric enzyme in carbohydrate metabolism. Enzymes from different sources differ in their regulatory mechanisms and in their natural substrates. However, all known phosphorylases share catalytic and structural properties	glgP	-	2.4.1.1	ko:K00688	ko00500,ko01100,ko01110,ko02026,ko04217,ko04910,ko04922,ko04931,map00500,map01100,map01110,map02026,map04217,map04910,map04922,map04931	-	R02111	-	ko00000,ko00001,ko01000	-	GT35	-	Phosphorylase
UFV1_05785	644284.Arch_0388	0.0	1261.0	COG0058@1|root,COG0058@2|Bacteria,2GIVZ@201174|Actinobacteria,4D43J@85005|Actinomycetales	201174|Actinobacteria	G	Phosphorylase is an important allosteric enzyme in carbohydrate metabolism. Enzymes from different sources differ in their regulatory mechanisms and in their natural substrates. However, all known phosphorylases share catalytic and structural properties	glgP	-	2.4.1.1	ko:K00688	ko00500,ko01100,ko01110,ko02026,ko04217,ko04910,ko04922,ko04931,map00500,map01100,map01110,map02026,map04217,map04910,map04922,map04931	-	R02111	-	ko00000,ko00001,ko01000	-	GT35	-	Phosphorylase
jx18_00940	644284.Arch_0388	0.0	1261.0	COG0058@1|root,COG0058@2|Bacteria,2GIVZ@201174|Actinobacteria,4D43J@85005|Actinomycetales	201174|Actinobacteria	G	Phosphorylase is an important allosteric enzyme in carbohydrate metabolism. Enzymes from different sources differ in their regulatory mechanisms and in their natural substrates. However, all known phosphorylases share catalytic and structural properties	glgP	-	2.4.1.1	ko:K00688	ko00500,ko01100,ko01110,ko02026,ko04217,ko04910,ko04922,ko04931,map00500,map01100,map01110,map02026,map04217,map04910,map04922,map04931	-	R02111	-	ko00000,ko00001,ko01000	-	GT35	-	Phosphorylase
TP6375_00850	1227261.HMPREF0043_01889	6.9e-98	298.0	COG1560@1|root,COG1560@2|Bacteria,2GM7B@201174|Actinobacteria,4D43F@85005|Actinomycetales	201174|Actinobacteria	M	Lipid A biosynthesis	htrB	GO:0003674,GO:0003824,GO:0005575,GO:0006629,GO:0006643,GO:0006664,GO:0008150,GO:0008152,GO:0008610,GO:0009058,GO:0009247,GO:0009987,GO:0016020,GO:0016740,GO:0016746,GO:0040007,GO:0044237,GO:0044238,GO:0044249,GO:0044255,GO:0046467,GO:0071704,GO:1901135,GO:1901137,GO:1901576,GO:1903509	2.3.1.265	ko:K22311	-	-	-	-	ko00000,ko01000	-	-	-	Lip_A_acyltrans
2012CQ_ZSH_08550	1227261.HMPREF0043_01889	9.78e-98	298.0	COG1560@1|root,COG1560@2|Bacteria,2GM7B@201174|Actinobacteria,4D43F@85005|Actinomycetales	201174|Actinobacteria	M	Lipid A biosynthesis	htrB	GO:0003674,GO:0003824,GO:0005575,GO:0006629,GO:0006643,GO:0006664,GO:0008150,GO:0008152,GO:0008610,GO:0009058,GO:0009247,GO:0009987,GO:0016020,GO:0016740,GO:0016746,GO:0040007,GO:0044237,GO:0044238,GO:0044249,GO:0044255,GO:0046467,GO:0071704,GO:1901135,GO:1901137,GO:1901576,GO:1903509	2.3.1.265	ko:K22311	-	-	-	-	ko00000,ko01000	-	-	-	Lip_A_acyltrans
Arash114_00845	1227261.HMPREF0043_01889	3.44e-98	299.0	COG1560@1|root,COG1560@2|Bacteria,2GM7B@201174|Actinobacteria,4D43F@85005|Actinomycetales	201174|Actinobacteria	M	Lipid A biosynthesis	htrB	GO:0003674,GO:0003824,GO:0005575,GO:0006629,GO:0006643,GO:0006664,GO:0008150,GO:0008152,GO:0008610,GO:0009058,GO:0009247,GO:0009987,GO:0016020,GO:0016740,GO:0016746,GO:0040007,GO:0044237,GO:0044238,GO:0044249,GO:0044255,GO:0046467,GO:0071704,GO:1901135,GO:1901137,GO:1901576,GO:1903509	2.3.1.265	ko:K22311	-	-	-	-	ko00000,ko01000	-	-	-	Lip_A_acyltrans
Bu5_04970	1227261.HMPREF0043_01889	4.87e-98	299.0	COG1560@1|root,COG1560@2|Bacteria,2GM7B@201174|Actinobacteria,4D43F@85005|Actinomycetales	201174|Actinobacteria	M	Lipid A biosynthesis	htrB	GO:0003674,GO:0003824,GO:0005575,GO:0006629,GO:0006643,GO:0006664,GO:0008150,GO:0008152,GO:0008610,GO:0009058,GO:0009247,GO:0009987,GO:0016020,GO:0016740,GO:0016746,GO:0040007,GO:0044237,GO:0044238,GO:0044249,GO:0044255,GO:0046467,GO:0071704,GO:1901135,GO:1901137,GO:1901576,GO:1903509	2.3.1.265	ko:K22311	-	-	-	-	ko00000,ko01000	-	-	-	Lip_A_acyltrans
DSM_20630_03135	1227261.HMPREF0043_01889	9.78e-98	298.0	COG1560@1|root,COG1560@2|Bacteria,2GM7B@201174|Actinobacteria,4D43F@85005|Actinomycetales	201174|Actinobacteria	M	Lipid A biosynthesis	htrB	GO:0003674,GO:0003824,GO:0005575,GO:0006629,GO:0006643,GO:0006664,GO:0008150,GO:0008152,GO:0008610,GO:0009058,GO:0009247,GO:0009987,GO:0016020,GO:0016740,GO:0016746,GO:0040007,GO:0044237,GO:0044238,GO:0044249,GO:0044255,GO:0046467,GO:0071704,GO:1901135,GO:1901137,GO:1901576,GO:1903509	2.3.1.265	ko:K22311	-	-	-	-	ko00000,ko01000	-	-	-	Lip_A_acyltrans
MS249_06355	1227261.HMPREF0043_01889	7.91e-97	296.0	COG1560@1|root,COG1560@2|Bacteria,2GM7B@201174|Actinobacteria,4D43F@85005|Actinomycetales	201174|Actinobacteria	M	Lipid A biosynthesis	htrB	GO:0003674,GO:0003824,GO:0005575,GO:0006629,GO:0006643,GO:0006664,GO:0008150,GO:0008152,GO:0008610,GO:0009058,GO:0009247,GO:0009987,GO:0016020,GO:0016740,GO:0016746,GO:0040007,GO:0044237,GO:0044238,GO:0044249,GO:0044255,GO:0046467,GO:0071704,GO:1901135,GO:1901137,GO:1901576,GO:1903509	2.3.1.265	ko:K22311	-	-	-	-	ko00000,ko01000	-	-	-	Lip_A_acyltrans
NCTC5224_05530	1227261.HMPREF0043_01889	9.78e-98	298.0	COG1560@1|root,COG1560@2|Bacteria,2GM7B@201174|Actinobacteria,4D43F@85005|Actinomycetales	201174|Actinobacteria	M	Lipid A biosynthesis	htrB	GO:0003674,GO:0003824,GO:0005575,GO:0006629,GO:0006643,GO:0006664,GO:0008150,GO:0008152,GO:0008610,GO:0009058,GO:0009247,GO:0009987,GO:0016020,GO:0016740,GO:0016746,GO:0040007,GO:0044237,GO:0044238,GO:0044249,GO:0044255,GO:0046467,GO:0071704,GO:1901135,GO:1901137,GO:1901576,GO:1903509	2.3.1.265	ko:K22311	-	-	-	-	ko00000,ko01000	-	-	-	Lip_A_acyltrans
SH01_09790	1227261.HMPREF0043_01889	2.78e-97	297.0	COG1560@1|root,COG1560@2|Bacteria,2GM7B@201174|Actinobacteria,4D43F@85005|Actinomycetales	201174|Actinobacteria	M	Lipid A biosynthesis	htrB	GO:0003674,GO:0003824,GO:0005575,GO:0006629,GO:0006643,GO:0006664,GO:0008150,GO:0008152,GO:0008610,GO:0009058,GO:0009247,GO:0009987,GO:0016020,GO:0016740,GO:0016746,GO:0040007,GO:0044237,GO:0044238,GO:0044249,GO:0044255,GO:0046467,GO:0071704,GO:1901135,GO:1901137,GO:1901576,GO:1903509	2.3.1.265	ko:K22311	-	-	-	-	ko00000,ko01000	-	-	-	Lip_A_acyltrans
SH02_06305	1227261.HMPREF0043_01889	4.25e-99	301.0	COG1560@1|root,COG1560@2|Bacteria,2GM7B@201174|Actinobacteria,4D43F@85005|Actinomycetales	201174|Actinobacteria	M	Lipid A biosynthesis	htrB	GO:0003674,GO:0003824,GO:0005575,GO:0006629,GO:0006643,GO:0006664,GO:0008150,GO:0008152,GO:0008610,GO:0009058,GO:0009247,GO:0009987,GO:0016020,GO:0016740,GO:0016746,GO:0040007,GO:0044237,GO:0044238,GO:0044249,GO:0044255,GO:0046467,GO:0071704,GO:1901135,GO:1901137,GO:1901576,GO:1903509	2.3.1.265	ko:K22311	-	-	-	-	ko00000,ko01000	-	-	-	Lip_A_acyltrans
SH03_00835	1227261.HMPREF0043_01889	2.78e-97	297.0	COG1560@1|root,COG1560@2|Bacteria,2GM7B@201174|Actinobacteria,4D43F@85005|Actinomycetales	201174|Actinobacteria	M	Lipid A biosynthesis	htrB	GO:0003674,GO:0003824,GO:0005575,GO:0006629,GO:0006643,GO:0006664,GO:0008150,GO:0008152,GO:0008610,GO:0009058,GO:0009247,GO:0009987,GO:0016020,GO:0016740,GO:0016746,GO:0040007,GO:0044237,GO:0044238,GO:0044249,GO:0044255,GO:0046467,GO:0071704,GO:1901135,GO:1901137,GO:1901576,GO:1903509	2.3.1.265	ko:K22311	-	-	-	-	ko00000,ko01000	-	-	-	Lip_A_acyltrans
TP1_03030	1227261.HMPREF0043_01889	5.58e-97	296.0	COG1560@1|root,COG1560@2|Bacteria,2GM7B@201174|Actinobacteria,4D43F@85005|Actinomycetales	201174|Actinobacteria	M	Lipid A biosynthesis	htrB	GO:0003674,GO:0003824,GO:0005575,GO:0006629,GO:0006643,GO:0006664,GO:0008150,GO:0008152,GO:0008610,GO:0009058,GO:0009247,GO:0009987,GO:0016020,GO:0016740,GO:0016746,GO:0040007,GO:0044237,GO:0044238,GO:0044249,GO:0044255,GO:0046467,GO:0071704,GO:1901135,GO:1901137,GO:1901576,GO:1903509	2.3.1.265	ko:K22311	-	-	-	-	ko00000,ko01000	-	-	-	Lip_A_acyltrans
TP2_09020	1227261.HMPREF0043_01889	2.12e-99	302.0	COG1560@1|root,COG1560@2|Bacteria,2GM7B@201174|Actinobacteria,4D43F@85005|Actinomycetales	201174|Actinobacteria	M	Lipid A biosynthesis	htrB	GO:0003674,GO:0003824,GO:0005575,GO:0006629,GO:0006643,GO:0006664,GO:0008150,GO:0008152,GO:0008610,GO:0009058,GO:0009247,GO:0009987,GO:0016020,GO:0016740,GO:0016746,GO:0040007,GO:0044237,GO:0044238,GO:0044249,GO:0044255,GO:0046467,GO:0071704,GO:1901135,GO:1901137,GO:1901576,GO:1903509	2.3.1.265	ko:K22311	-	-	-	-	ko00000,ko01000	-	-	-	Lip_A_acyltrans
TP3_03660	1227261.HMPREF0043_01889	4.25e-99	301.0	COG1560@1|root,COG1560@2|Bacteria,2GM7B@201174|Actinobacteria,4D43F@85005|Actinomycetales	201174|Actinobacteria	M	Lipid A biosynthesis	htrB	GO:0003674,GO:0003824,GO:0005575,GO:0006629,GO:0006643,GO:0006664,GO:0008150,GO:0008152,GO:0008610,GO:0009058,GO:0009247,GO:0009987,GO:0016020,GO:0016740,GO:0016746,GO:0040007,GO:0044237,GO:0044238,GO:0044249,GO:0044255,GO:0046467,GO:0071704,GO:1901135,GO:1901137,GO:1901576,GO:1903509	2.3.1.265	ko:K22311	-	-	-	-	ko00000,ko01000	-	-	-	Lip_A_acyltrans
TP4_00990	1227261.HMPREF0043_01889	4.25e-99	301.0	COG1560@1|root,COG1560@2|Bacteria,2GM7B@201174|Actinobacteria,4D43F@85005|Actinomycetales	201174|Actinobacteria	M	Lipid A biosynthesis	htrB	GO:0003674,GO:0003824,GO:0005575,GO:0006629,GO:0006643,GO:0006664,GO:0008150,GO:0008152,GO:0008610,GO:0009058,GO:0009247,GO:0009987,GO:0016020,GO:0016740,GO:0016746,GO:0040007,GO:0044237,GO:0044238,GO:0044249,GO:0044255,GO:0046467,GO:0071704,GO:1901135,GO:1901137,GO:1901576,GO:1903509	2.3.1.265	ko:K22311	-	-	-	-	ko00000,ko01000	-	-	-	Lip_A_acyltrans
TP4479_10005	1227261.HMPREF0043_01889	4.25e-99	301.0	COG1560@1|root,COG1560@2|Bacteria,2GM7B@201174|Actinobacteria,4D43F@85005|Actinomycetales	201174|Actinobacteria	M	Lipid A biosynthesis	htrB	GO:0003674,GO:0003824,GO:0005575,GO:0006629,GO:0006643,GO:0006664,GO:0008150,GO:0008152,GO:0008610,GO:0009058,GO:0009247,GO:0009987,GO:0016020,GO:0016740,GO:0016746,GO:0040007,GO:0044237,GO:0044238,GO:0044249,GO:0044255,GO:0046467,GO:0071704,GO:1901135,GO:1901137,GO:1901576,GO:1903509	2.3.1.265	ko:K22311	-	-	-	-	ko00000,ko01000	-	-	-	Lip_A_acyltrans
TP8_06045	1227261.HMPREF0043_01889	9.78e-98	298.0	COG1560@1|root,COG1560@2|Bacteria,2GM7B@201174|Actinobacteria,4D43F@85005|Actinomycetales	201174|Actinobacteria	M	Lipid A biosynthesis	htrB	GO:0003674,GO:0003824,GO:0005575,GO:0006629,GO:0006643,GO:0006664,GO:0008150,GO:0008152,GO:0008610,GO:0009058,GO:0009247,GO:0009987,GO:0016020,GO:0016740,GO:0016746,GO:0040007,GO:0044237,GO:0044238,GO:0044249,GO:0044255,GO:0046467,GO:0071704,GO:1901135,GO:1901137,GO:1901576,GO:1903509	2.3.1.265	ko:K22311	-	-	-	-	ko00000,ko01000	-	-	-	Lip_A_acyltrans
TP_2849_01060	1227261.HMPREF0043_01889	4.25e-99	301.0	COG1560@1|root,COG1560@2|Bacteria,2GM7B@201174|Actinobacteria,4D43F@85005|Actinomycetales	201174|Actinobacteria	M	Lipid A biosynthesis	htrB	GO:0003674,GO:0003824,GO:0005575,GO:0006629,GO:0006643,GO:0006664,GO:0008150,GO:0008152,GO:0008610,GO:0009058,GO:0009247,GO:0009987,GO:0016020,GO:0016740,GO:0016746,GO:0040007,GO:0044237,GO:0044238,GO:0044249,GO:0044255,GO:0046467,GO:0071704,GO:1901135,GO:1901137,GO:1901576,GO:1903509	2.3.1.265	ko:K22311	-	-	-	-	ko00000,ko01000	-	-	-	Lip_A_acyltrans
UFV1_02245	1227261.HMPREF0043_01889	6.9e-98	298.0	COG1560@1|root,COG1560@2|Bacteria,2GM7B@201174|Actinobacteria,4D43F@85005|Actinomycetales	201174|Actinobacteria	M	Lipid A biosynthesis	htrB	GO:0003674,GO:0003824,GO:0005575,GO:0006629,GO:0006643,GO:0006664,GO:0008150,GO:0008152,GO:0008610,GO:0009058,GO:0009247,GO:0009987,GO:0016020,GO:0016740,GO:0016746,GO:0040007,GO:0044237,GO:0044238,GO:0044249,GO:0044255,GO:0046467,GO:0071704,GO:1901135,GO:1901137,GO:1901576,GO:1903509	2.3.1.265	ko:K22311	-	-	-	-	ko00000,ko01000	-	-	-	Lip_A_acyltrans
jx18_02760	1227261.HMPREF0043_01889	9.78e-98	298.0	COG1560@1|root,COG1560@2|Bacteria,2GM7B@201174|Actinobacteria,4D43F@85005|Actinomycetales	201174|Actinobacteria	M	Lipid A biosynthesis	htrB	GO:0003674,GO:0003824,GO:0005575,GO:0006629,GO:0006643,GO:0006664,GO:0008150,GO:0008152,GO:0008610,GO:0009058,GO:0009247,GO:0009987,GO:0016020,GO:0016740,GO:0016746,GO:0040007,GO:0044237,GO:0044238,GO:0044249,GO:0044255,GO:0046467,GO:0071704,GO:1901135,GO:1901137,GO:1901576,GO:1903509	2.3.1.265	ko:K22311	-	-	-	-	ko00000,ko01000	-	-	-	Lip_A_acyltrans
TP6375_05415	883067.HMPREF9237_00818	2.36e-90	276.0	COG4608@1|root,COG4608@2|Bacteria,2H4BW@201174|Actinobacteria,4D435@85005|Actinomycetales	201174|Actinobacteria	E	ABC transporter	-	-	-	ko:K02032	ko02024,map02024	M00239	-	-	ko00000,ko00001,ko00002,ko02000	3.A.1.5	-	-	ABC_tran,oligo_HPY
2012CQ_ZSH_05120	883067.HMPREF9237_00818	9.51e-90	275.0	COG4608@1|root,COG4608@2|Bacteria,2H4BW@201174|Actinobacteria,4D435@85005|Actinomycetales	201174|Actinobacteria	E	ABC transporter	-	-	-	ko:K02032	ko02024,map02024	M00239	-	-	ko00000,ko00001,ko00002,ko02000	3.A.1.5	-	-	ABC_tran,oligo_HPY
Arash114_05415	883067.HMPREF9237_00818	9.51e-90	275.0	COG4608@1|root,COG4608@2|Bacteria,2H4BW@201174|Actinobacteria,4D435@85005|Actinomycetales	201174|Actinobacteria	E	ABC transporter	-	-	-	ko:K02032	ko02024,map02024	M00239	-	-	ko00000,ko00001,ko00002,ko02000	3.A.1.5	-	-	ABC_tran,oligo_HPY
Bu5_00975	883067.HMPREF9237_00818	2.36e-90	276.0	COG4608@1|root,COG4608@2|Bacteria,2H4BW@201174|Actinobacteria,4D435@85005|Actinomycetales	201174|Actinobacteria	E	ABC transporter	-	-	-	ko:K02032	ko02024,map02024	M00239	-	-	ko00000,ko00001,ko00002,ko02000	3.A.1.5	-	-	ABC_tran,oligo_HPY
DSM_20630_05805	883067.HMPREF9237_00818	9.51e-90	275.0	COG4608@1|root,COG4608@2|Bacteria,2H4BW@201174|Actinobacteria,4D435@85005|Actinomycetales	201174|Actinobacteria	E	ABC transporter	-	-	-	ko:K02032	ko02024,map02024	M00239	-	-	ko00000,ko00001,ko00002,ko02000	3.A.1.5	-	-	ABC_tran,oligo_HPY
MS249_04820	883067.HMPREF9237_00818	1.91e-89	274.0	COG4608@1|root,COG4608@2|Bacteria,2H4BW@201174|Actinobacteria,4D435@85005|Actinomycetales	201174|Actinobacteria	E	ABC transporter	-	-	-	ko:K02032	ko02024,map02024	M00239	-	-	ko00000,ko00001,ko00002,ko02000	3.A.1.5	-	-	ABC_tran,oligo_HPY
NCTC5224_02105	883067.HMPREF9237_00818	9.51e-90	275.0	COG4608@1|root,COG4608@2|Bacteria,2H4BW@201174|Actinobacteria,4D435@85005|Actinomycetales	201174|Actinobacteria	E	ABC transporter	-	-	-	ko:K02032	ko02024,map02024	M00239	-	-	ko00000,ko00001,ko00002,ko02000	3.A.1.5	-	-	ABC_tran,oligo_HPY
SH01_00955	883067.HMPREF9237_00818	9.51e-90	275.0	COG4608@1|root,COG4608@2|Bacteria,2H4BW@201174|Actinobacteria,4D435@85005|Actinomycetales	201174|Actinobacteria	E	ABC transporter	-	-	-	ko:K02032	ko02024,map02024	M00239	-	-	ko00000,ko00001,ko00002,ko02000	3.A.1.5	-	-	ABC_tran,oligo_HPY
SH02_00855	883067.HMPREF9237_00818	2.36e-90	276.0	COG4608@1|root,COG4608@2|Bacteria,2H4BW@201174|Actinobacteria,4D435@85005|Actinomycetales	201174|Actinobacteria	E	ABC transporter	-	-	-	ko:K02032	ko02024,map02024	M00239	-	-	ko00000,ko00001,ko00002,ko02000	3.A.1.5	-	-	ABC_tran,oligo_HPY
SH03_07825	883067.HMPREF9237_00818	2.36e-90	276.0	COG4608@1|root,COG4608@2|Bacteria,2H4BW@201174|Actinobacteria,4D435@85005|Actinomycetales	201174|Actinobacteria	E	ABC transporter	-	-	-	ko:K02032	ko02024,map02024	M00239	-	-	ko00000,ko00001,ko00002,ko02000	3.A.1.5	-	-	ABC_tran,oligo_HPY
TP1_06470	883067.HMPREF9237_00818	2.36e-90	276.0	COG4608@1|root,COG4608@2|Bacteria,2H4BW@201174|Actinobacteria,4D435@85005|Actinomycetales	201174|Actinobacteria	E	ABC transporter	-	-	-	ko:K02032	ko02024,map02024	M00239	-	-	ko00000,ko00001,ko00002,ko02000	3.A.1.5	-	-	ABC_tran,oligo_HPY
TP2_02055	883067.HMPREF9237_00818	8.28e-91	277.0	COG4608@1|root,COG4608@2|Bacteria,2H4BW@201174|Actinobacteria,4D435@85005|Actinomycetales	201174|Actinobacteria	E	ABC transporter	-	-	-	ko:K02032	ko02024,map02024	M00239	-	-	ko00000,ko00001,ko00002,ko02000	3.A.1.5	-	-	ABC_tran,oligo_HPY
TP3_00050	883067.HMPREF9237_00818	9.51e-90	275.0	COG4608@1|root,COG4608@2|Bacteria,2H4BW@201174|Actinobacteria,4D435@85005|Actinomycetales	201174|Actinobacteria	E	ABC transporter	-	-	-	ko:K02032	ko02024,map02024	M00239	-	-	ko00000,ko00001,ko00002,ko02000	3.A.1.5	-	-	ABC_tran,oligo_HPY
TP4_04955	883067.HMPREF9237_00818	3.84e-89	273.0	COG4608@1|root,COG4608@2|Bacteria,2H4BW@201174|Actinobacteria,4D435@85005|Actinomycetales	201174|Actinobacteria	E	ABC transporter	-	-	-	ko:K02032	ko02024,map02024	M00239	-	-	ko00000,ko00001,ko00002,ko02000	3.A.1.5	-	-	ABC_tran,oligo_HPY
TP4479_06400	883067.HMPREF9237_00818	9.51e-90	275.0	COG4608@1|root,COG4608@2|Bacteria,2H4BW@201174|Actinobacteria,4D435@85005|Actinomycetales	201174|Actinobacteria	E	ABC transporter	-	-	-	ko:K02032	ko02024,map02024	M00239	-	-	ko00000,ko00001,ko00002,ko02000	3.A.1.5	-	-	ABC_tran,oligo_HPY
TP8_02305	883067.HMPREF9237_00818	9.51e-90	275.0	COG4608@1|root,COG4608@2|Bacteria,2H4BW@201174|Actinobacteria,4D435@85005|Actinomycetales	201174|Actinobacteria	E	ABC transporter	-	-	-	ko:K02032	ko02024,map02024	M00239	-	-	ko00000,ko00001,ko00002,ko02000	3.A.1.5	-	-	ABC_tran,oligo_HPY
TP_2849_08335	883067.HMPREF9237_00818	9.51e-90	275.0	COG4608@1|root,COG4608@2|Bacteria,2H4BW@201174|Actinobacteria,4D435@85005|Actinomycetales	201174|Actinobacteria	E	ABC transporter	-	-	-	ko:K02032	ko02024,map02024	M00239	-	-	ko00000,ko00001,ko00002,ko02000	3.A.1.5	-	-	ABC_tran,oligo_HPY
UFV1_00645	883067.HMPREF9237_00818	2.36e-90	276.0	COG4608@1|root,COG4608@2|Bacteria,2H4BW@201174|Actinobacteria,4D435@85005|Actinomycetales	201174|Actinobacteria	E	ABC transporter	-	-	-	ko:K02032	ko02024,map02024	M00239	-	-	ko00000,ko00001,ko00002,ko02000	3.A.1.5	-	-	ABC_tran,oligo_HPY
jx18_06620	883067.HMPREF9237_00818	9.51e-90	275.0	COG4608@1|root,COG4608@2|Bacteria,2H4BW@201174|Actinobacteria,4D435@85005|Actinomycetales	201174|Actinobacteria	E	ABC transporter	-	-	-	ko:K02032	ko02024,map02024	M00239	-	-	ko00000,ko00001,ko00002,ko02000	3.A.1.5	-	-	ABC_tran,oligo_HPY
TP6375_09390	1121362.A605_10665	6.38e-151	432.0	COG1172@1|root,COG1172@2|Bacteria,2GJDW@201174|Actinobacteria,22RAD@1653|Corynebacteriaceae	201174|Actinobacteria	G	Belongs to the binding-protein-dependent transport system permease family	rbsC	-	-	ko:K10439,ko:K10440	ko02010,ko02030,map02010,map02030	M00212	-	-	ko00000,ko00001,ko00002,ko02000	3.A.1.2.1,3.A.1.2.13,3.A.1.2.19	-	-	BPD_transp_2,Peripla_BP_4
2012CQ_ZSH_01260	1121362.A605_10665	9.05e-151	432.0	COG1172@1|root,COG1172@2|Bacteria,2GJDW@201174|Actinobacteria,22RAD@1653|Corynebacteriaceae	201174|Actinobacteria	G	Belongs to the binding-protein-dependent transport system permease family	rbsC	-	-	ko:K10439,ko:K10440	ko02010,ko02030,map02010,map02030	M00212	-	-	ko00000,ko00001,ko00002,ko02000	3.A.1.2.1,3.A.1.2.13,3.A.1.2.19	-	-	BPD_transp_2,Peripla_BP_4
Arash114_09415	1121362.A605_10665	9.05e-151	432.0	COG1172@1|root,COG1172@2|Bacteria,2GJDW@201174|Actinobacteria,22RAD@1653|Corynebacteriaceae	201174|Actinobacteria	G	Belongs to the binding-protein-dependent transport system permease family	rbsC	-	-	ko:K10439,ko:K10440	ko02010,ko02030,map02010,map02030	M00212	-	-	ko00000,ko00001,ko00002,ko02000	3.A.1.2.1,3.A.1.2.13,3.A.1.2.19	-	-	BPD_transp_2,Peripla_BP_4
Bu5_05905	1121362.A605_10665	9.05e-151	432.0	COG1172@1|root,COG1172@2|Bacteria,2GJDW@201174|Actinobacteria,22RAD@1653|Corynebacteriaceae	201174|Actinobacteria	G	Belongs to the binding-protein-dependent transport system permease family	rbsC	-	-	ko:K10439,ko:K10440	ko02010,ko02030,map02010,map02030	M00212	-	-	ko00000,ko00001,ko00002,ko02000	3.A.1.2.1,3.A.1.2.13,3.A.1.2.19	-	-	BPD_transp_2,Peripla_BP_4
DSM_20630_05345	1121362.A605_10665	9.05e-151	432.0	COG1172@1|root,COG1172@2|Bacteria,2GJDW@201174|Actinobacteria,22RAD@1653|Corynebacteriaceae	201174|Actinobacteria	G	Belongs to the binding-protein-dependent transport system permease family	rbsC	-	-	ko:K10439,ko:K10440	ko02010,ko02030,map02010,map02030	M00212	-	-	ko00000,ko00001,ko00002,ko02000	3.A.1.2.1,3.A.1.2.13,3.A.1.2.19	-	-	BPD_transp_2,Peripla_BP_4
MS249_06690	1121362.A605_10665	9.05e-151	432.0	COG1172@1|root,COG1172@2|Bacteria,2GJDW@201174|Actinobacteria,22RAD@1653|Corynebacteriaceae	201174|Actinobacteria	G	Belongs to the binding-protein-dependent transport system permease family	rbsC	-	-	ko:K10439,ko:K10440	ko02010,ko02030,map02010,map02030	M00212	-	-	ko00000,ko00001,ko00002,ko02000	3.A.1.2.1,3.A.1.2.13,3.A.1.2.19	-	-	BPD_transp_2,Peripla_BP_4
NCTC5224_08420	1121362.A605_10665	9.05e-151	432.0	COG1172@1|root,COG1172@2|Bacteria,2GJDW@201174|Actinobacteria,22RAD@1653|Corynebacteriaceae	201174|Actinobacteria	G	Belongs to the binding-protein-dependent transport system permease family	rbsC	-	-	ko:K10439,ko:K10440	ko02010,ko02030,map02010,map02030	M00212	-	-	ko00000,ko00001,ko00002,ko02000	3.A.1.2.1,3.A.1.2.13,3.A.1.2.19	-	-	BPD_transp_2,Peripla_BP_4
SH01_09900	1121362.A605_10665	9.05e-151	432.0	COG1172@1|root,COG1172@2|Bacteria,2GJDW@201174|Actinobacteria,22RAD@1653|Corynebacteriaceae	201174|Actinobacteria	G	Belongs to the binding-protein-dependent transport system permease family	rbsC	-	-	ko:K10439,ko:K10440	ko02010,ko02030,map02010,map02030	M00212	-	-	ko00000,ko00001,ko00002,ko02000	3.A.1.2.1,3.A.1.2.13,3.A.1.2.19	-	-	BPD_transp_2,Peripla_BP_4
SH02_03605	1121362.A605_10665	9.05e-151	432.0	COG1172@1|root,COG1172@2|Bacteria,2GJDW@201174|Actinobacteria,22RAD@1653|Corynebacteriaceae	201174|Actinobacteria	G	Belongs to the binding-protein-dependent transport system permease family	rbsC	-	-	ko:K10439,ko:K10440	ko02010,ko02030,map02010,map02030	M00212	-	-	ko00000,ko00001,ko00002,ko02000	3.A.1.2.1,3.A.1.2.13,3.A.1.2.19	-	-	BPD_transp_2,Peripla_BP_4
SH03_09140	1121362.A605_10665	3.67e-150	430.0	COG1172@1|root,COG1172@2|Bacteria,2GJDW@201174|Actinobacteria,22RAD@1653|Corynebacteriaceae	201174|Actinobacteria	G	Belongs to the binding-protein-dependent transport system permease family	rbsC	-	-	ko:K10439,ko:K10440	ko02010,ko02030,map02010,map02030	M00212	-	-	ko00000,ko00001,ko00002,ko02000	3.A.1.2.1,3.A.1.2.13,3.A.1.2.19	-	-	BPD_transp_2,Peripla_BP_4
TP1_10270	1121362.A605_10665	9.05e-151	432.0	COG1172@1|root,COG1172@2|Bacteria,2GJDW@201174|Actinobacteria,22RAD@1653|Corynebacteriaceae	201174|Actinobacteria	G	Belongs to the binding-protein-dependent transport system permease family	rbsC	-	-	ko:K10439,ko:K10440	ko02010,ko02030,map02010,map02030	M00212	-	-	ko00000,ko00001,ko00002,ko02000	3.A.1.2.1,3.A.1.2.13,3.A.1.2.19	-	-	BPD_transp_2,Peripla_BP_4
TP2_05970	1121362.A605_10665	6.38e-151	432.0	COG1172@1|root,COG1172@2|Bacteria,2GJDW@201174|Actinobacteria,22RAD@1653|Corynebacteriaceae	201174|Actinobacteria	G	Belongs to the binding-protein-dependent transport system permease family	rbsC	-	-	ko:K10439,ko:K10440	ko02010,ko02030,map02010,map02030	M00212	-	-	ko00000,ko00001,ko00002,ko02000	3.A.1.2.1,3.A.1.2.13,3.A.1.2.19	-	-	BPD_transp_2,Peripla_BP_4
TP3_06630	1121362.A605_10665	9.05e-151	432.0	COG1172@1|root,COG1172@2|Bacteria,2GJDW@201174|Actinobacteria,22RAD@1653|Corynebacteriaceae	201174|Actinobacteria	G	Belongs to the binding-protein-dependent transport system permease family	rbsC	-	-	ko:K10439,ko:K10440	ko02010,ko02030,map02010,map02030	M00212	-	-	ko00000,ko00001,ko00002,ko02000	3.A.1.2.1,3.A.1.2.13,3.A.1.2.19	-	-	BPD_transp_2,Peripla_BP_4
TP4_09170	1121362.A605_10665	9.05e-151	432.0	COG1172@1|root,COG1172@2|Bacteria,2GJDW@201174|Actinobacteria,22RAD@1653|Corynebacteriaceae	201174|Actinobacteria	G	Belongs to the binding-protein-dependent transport system permease family	rbsC	-	-	ko:K10439,ko:K10440	ko02010,ko02030,map02010,map02030	M00212	-	-	ko00000,ko00001,ko00002,ko02000	3.A.1.2.1,3.A.1.2.13,3.A.1.2.19	-	-	BPD_transp_2,Peripla_BP_4
TP4479_02115	1121362.A605_10665	9.05e-151	432.0	COG1172@1|root,COG1172@2|Bacteria,2GJDW@201174|Actinobacteria,22RAD@1653|Corynebacteriaceae	201174|Actinobacteria	G	Belongs to the binding-protein-dependent transport system permease family	rbsC	-	-	ko:K10439,ko:K10440	ko02010,ko02030,map02010,map02030	M00212	-	-	ko00000,ko00001,ko00002,ko02000	3.A.1.2.1,3.A.1.2.13,3.A.1.2.19	-	-	BPD_transp_2,Peripla_BP_4
TP8_08910	1121362.A605_10665	3.67e-150	430.0	COG1172@1|root,COG1172@2|Bacteria,2GJDW@201174|Actinobacteria,22RAD@1653|Corynebacteriaceae	201174|Actinobacteria	G	Belongs to the binding-protein-dependent transport system permease family	rbsC	-	-	ko:K10439,ko:K10440	ko02010,ko02030,map02010,map02030	M00212	-	-	ko00000,ko00001,ko00002,ko02000	3.A.1.2.1,3.A.1.2.13,3.A.1.2.19	-	-	BPD_transp_2,Peripla_BP_4
TP_2849_04040	1121362.A605_10665	9.05e-151	432.0	COG1172@1|root,COG1172@2|Bacteria,2GJDW@201174|Actinobacteria,22RAD@1653|Corynebacteriaceae	201174|Actinobacteria	G	Belongs to the binding-protein-dependent transport system permease family	rbsC	-	-	ko:K10439,ko:K10440	ko02010,ko02030,map02010,map02030	M00212	-	-	ko00000,ko00001,ko00002,ko02000	3.A.1.2.1,3.A.1.2.13,3.A.1.2.19	-	-	BPD_transp_2,Peripla_BP_4
UFV1_00300	1121362.A605_10665	6.38e-151	432.0	COG1172@1|root,COG1172@2|Bacteria,2GJDW@201174|Actinobacteria,22RAD@1653|Corynebacteriaceae	201174|Actinobacteria	G	Belongs to the binding-protein-dependent transport system permease family	rbsC	-	-	ko:K10439,ko:K10440	ko02010,ko02030,map02010,map02030	M00212	-	-	ko00000,ko00001,ko00002,ko02000	3.A.1.2.1,3.A.1.2.13,3.A.1.2.19	-	-	BPD_transp_2,Peripla_BP_4
jx18_11045	1121362.A605_10665	3.67e-150	430.0	COG1172@1|root,COG1172@2|Bacteria,2GJDW@201174|Actinobacteria,22RAD@1653|Corynebacteriaceae	201174|Actinobacteria	G	Belongs to the binding-protein-dependent transport system permease family	rbsC	-	-	ko:K10439,ko:K10440	ko02010,ko02030,map02010,map02030	M00212	-	-	ko00000,ko00001,ko00002,ko02000	3.A.1.2.1,3.A.1.2.13,3.A.1.2.19	-	-	BPD_transp_2,Peripla_BP_4
TP6375_10530	465515.Mlut_21600	3.2e-87	263.0	COG1136@1|root,COG1136@2|Bacteria,2IGYA@201174|Actinobacteria	201174|Actinobacteria	V	Pfam ABC transporter	-	-	-	ko:K02003,ko:K09810	ko02010,map02010	M00255,M00258	-	-	ko00000,ko00001,ko00002,ko01000,ko02000	3.A.1,3.A.1.125	-	-	ABC_tran
2012CQ_ZSH_00255	465515.Mlut_21600	9.15e-87	262.0	COG1136@1|root,COG1136@2|Bacteria,2IGYA@201174|Actinobacteria	201174|Actinobacteria	V	Pfam ABC transporter	-	-	-	ko:K02003,ko:K09810	ko02010,map02010	M00255,M00258	-	-	ko00000,ko00001,ko00002,ko01000,ko02000	3.A.1,3.A.1.125	-	-	ABC_tran
Arash114_10575	465515.Mlut_21600	4.79e-89	268.0	COG1136@1|root,COG1136@2|Bacteria,2IGYA@201174|Actinobacteria	201174|Actinobacteria	V	Pfam ABC transporter	-	-	-	ko:K02003,ko:K09810	ko02010,map02010	M00255,M00258	-	-	ko00000,ko00001,ko00002,ko01000,ko02000	3.A.1,3.A.1.125	-	-	ABC_tran
Bu5_08175	465515.Mlut_21600	4.79e-89	268.0	COG1136@1|root,COG1136@2|Bacteria,2IGYA@201174|Actinobacteria	201174|Actinobacteria	V	Pfam ABC transporter	-	-	-	ko:K02003,ko:K09810	ko02010,map02010	M00255,M00258	-	-	ko00000,ko00001,ko00002,ko01000,ko02000	3.A.1,3.A.1.125	-	-	ABC_tran
DSM_20630_04095	465515.Mlut_21600	4.54e-87	263.0	COG1136@1|root,COG1136@2|Bacteria,2IGYA@201174|Actinobacteria	201174|Actinobacteria	V	Pfam ABC transporter	-	-	-	ko:K02003,ko:K09810	ko02010,map02010	M00255,M00258	-	-	ko00000,ko00001,ko00002,ko01000,ko02000	3.A.1,3.A.1.125	-	-	ABC_tran
MS249_04460	465515.Mlut_21600	4.79e-89	268.0	COG1136@1|root,COG1136@2|Bacteria,2IGYA@201174|Actinobacteria	201174|Actinobacteria	V	Pfam ABC transporter	-	-	-	ko:K02003,ko:K09810	ko02010,map02010	M00255,M00258	-	-	ko00000,ko00001,ko00002,ko01000,ko02000	3.A.1,3.A.1.125	-	-	ABC_tran
NCTC5224_07340	465515.Mlut_21600	4.54e-87	263.0	COG1136@1|root,COG1136@2|Bacteria,2IGYA@201174|Actinobacteria	201174|Actinobacteria	V	Pfam ABC transporter	-	-	-	ko:K02003,ko:K09810	ko02010,map02010	M00255,M00258	-	-	ko00000,ko00001,ko00002,ko01000,ko02000	3.A.1,3.A.1.125	-	-	ABC_tran
SH01_03025	465515.Mlut_21600	4.79e-89	268.0	COG1136@1|root,COG1136@2|Bacteria,2IGYA@201174|Actinobacteria	201174|Actinobacteria	V	Pfam ABC transporter	-	-	-	ko:K02003,ko:K09810	ko02010,map02010	M00255,M00258	-	-	ko00000,ko00001,ko00002,ko01000,ko02000	3.A.1,3.A.1.125	-	-	ABC_tran
SH02_09740	465515.Mlut_21600	4.79e-89	268.0	COG1136@1|root,COG1136@2|Bacteria,2IGYA@201174|Actinobacteria	201174|Actinobacteria	V	Pfam ABC transporter	-	-	-	ko:K02003,ko:K09810	ko02010,map02010	M00255,M00258	-	-	ko00000,ko00001,ko00002,ko01000,ko02000	3.A.1,3.A.1.125	-	-	ABC_tran
SH03_05595	465515.Mlut_21600	4.79e-89	268.0	COG1136@1|root,COG1136@2|Bacteria,2IGYA@201174|Actinobacteria	201174|Actinobacteria	V	Pfam ABC transporter	-	-	-	ko:K02003,ko:K09810	ko02010,map02010	M00255,M00258	-	-	ko00000,ko00001,ko00002,ko01000,ko02000	3.A.1,3.A.1.125	-	-	ABC_tran
TP1_01195	465515.Mlut_21600	4.79e-89	268.0	COG1136@1|root,COG1136@2|Bacteria,2IGYA@201174|Actinobacteria	201174|Actinobacteria	V	Pfam ABC transporter	-	-	-	ko:K02003,ko:K09810	ko02010,map02010	M00255,M00258	-	-	ko00000,ko00001,ko00002,ko01000,ko02000	3.A.1,3.A.1.125	-	-	ABC_tran
TP2_07075	465515.Mlut_21600	4.79e-89	268.0	COG1136@1|root,COG1136@2|Bacteria,2IGYA@201174|Actinobacteria	201174|Actinobacteria	V	Pfam ABC transporter	-	-	-	ko:K02003,ko:K09810	ko02010,map02010	M00255,M00258	-	-	ko00000,ko00001,ko00002,ko01000,ko02000	3.A.1,3.A.1.125	-	-	ABC_tran
TP3_05510	465515.Mlut_21600	4.79e-89	268.0	COG1136@1|root,COG1136@2|Bacteria,2IGYA@201174|Actinobacteria	201174|Actinobacteria	V	Pfam ABC transporter	-	-	-	ko:K02003,ko:K09810	ko02010,map02010	M00255,M00258	-	-	ko00000,ko00001,ko00002,ko01000,ko02000	3.A.1,3.A.1.125	-	-	ABC_tran
TP4_10290	465515.Mlut_21600	4.79e-89	268.0	COG1136@1|root,COG1136@2|Bacteria,2IGYA@201174|Actinobacteria	201174|Actinobacteria	V	Pfam ABC transporter	-	-	-	ko:K02003,ko:K09810	ko02010,map02010	M00255,M00258	-	-	ko00000,ko00001,ko00002,ko01000,ko02000	3.A.1,3.A.1.125	-	-	ABC_tran
TP4479_00990	465515.Mlut_21600	4.79e-89	268.0	COG1136@1|root,COG1136@2|Bacteria,2IGYA@201174|Actinobacteria	201174|Actinobacteria	V	Pfam ABC transporter	-	-	-	ko:K02003,ko:K09810	ko02010,map02010	M00255,M00258	-	-	ko00000,ko00001,ko00002,ko01000,ko02000	3.A.1,3.A.1.125	-	-	ABC_tran
TP8_07840	465515.Mlut_21600	9.15e-87	262.0	COG1136@1|root,COG1136@2|Bacteria,2IGYA@201174|Actinobacteria	201174|Actinobacteria	V	Pfam ABC transporter	-	-	-	ko:K02003,ko:K09810	ko02010,map02010	M00255,M00258	-	-	ko00000,ko00001,ko00002,ko01000,ko02000	3.A.1,3.A.1.125	-	-	ABC_tran
TP_2849_02915	465515.Mlut_21600	4.79e-89	268.0	COG1136@1|root,COG1136@2|Bacteria,2IGYA@201174|Actinobacteria	201174|Actinobacteria	V	Pfam ABC transporter	-	-	-	ko:K02003,ko:K09810	ko02010,map02010	M00255,M00258	-	-	ko00000,ko00001,ko00002,ko01000,ko02000	3.A.1,3.A.1.125	-	-	ABC_tran
UFV1_05765	465515.Mlut_21600	3.2e-87	263.0	COG1136@1|root,COG1136@2|Bacteria,2IGYA@201174|Actinobacteria	201174|Actinobacteria	V	Pfam ABC transporter	-	-	-	ko:K02003,ko:K09810	ko02010,map02010	M00255,M00258	-	-	ko00000,ko00001,ko00002,ko01000,ko02000	3.A.1,3.A.1.125	-	-	ABC_tran
jx18_00915	465515.Mlut_21600	4.79e-89	268.0	COG1136@1|root,COG1136@2|Bacteria,2IGYA@201174|Actinobacteria	201174|Actinobacteria	V	Pfam ABC transporter	-	-	-	ko:K02003,ko:K09810	ko02010,map02010	M00255,M00258	-	-	ko00000,ko00001,ko00002,ko01000,ko02000	3.A.1,3.A.1.125	-	-	ABC_tran
TP6375_01775	644284.Arch_0645	2.26e-78	239.0	COG0558@1|root,COG0558@2|Bacteria,2GK5D@201174|Actinobacteria,4D4I7@85005|Actinomycetales	201174|Actinobacteria	I	Belongs to the CDP-alcohol phosphatidyltransferase class-I family	pgsA	GO:0003674,GO:0003824,GO:0005575,GO:0005618,GO:0005623,GO:0006629,GO:0006644,GO:0006650,GO:0006793,GO:0006796,GO:0008150,GO:0008152,GO:0008444,GO:0008610,GO:0008654,GO:0009058,GO:0009987,GO:0016740,GO:0016772,GO:0016780,GO:0017169,GO:0019637,GO:0030312,GO:0040007,GO:0044237,GO:0044238,GO:0044249,GO:0044255,GO:0044464,GO:0045017,GO:0046474,GO:0046486,GO:0071704,GO:0071944,GO:0090407,GO:1901576	2.7.8.41,2.7.8.5	ko:K00995,ko:K08744	ko00564,ko01100,map00564,map01100	-	R01801,R02030	RC00002,RC00017,RC02795	ko00000,ko00001,ko01000	-	-	-	CDP-OH_P_transf
2012CQ_ZSH_09365	644284.Arch_0645	1.3e-77	238.0	COG0558@1|root,COG0558@2|Bacteria,2GK5D@201174|Actinobacteria,4D4I7@85005|Actinomycetales	201174|Actinobacteria	I	Belongs to the CDP-alcohol phosphatidyltransferase class-I family	pgsA	GO:0003674,GO:0003824,GO:0005575,GO:0005618,GO:0005623,GO:0006629,GO:0006644,GO:0006650,GO:0006793,GO:0006796,GO:0008150,GO:0008152,GO:0008444,GO:0008610,GO:0008654,GO:0009058,GO:0009987,GO:0016740,GO:0016772,GO:0016780,GO:0017169,GO:0019637,GO:0030312,GO:0040007,GO:0044237,GO:0044238,GO:0044249,GO:0044255,GO:0044464,GO:0045017,GO:0046474,GO:0046486,GO:0071704,GO:0071944,GO:0090407,GO:1901576	2.7.8.41,2.7.8.5	ko:K00995,ko:K08744	ko00564,ko01100,map00564,map01100	-	R01801,R02030	RC00002,RC00017,RC02795	ko00000,ko00001,ko01000	-	-	-	CDP-OH_P_transf
Arash114_01775	644284.Arch_0645	2.26e-78	239.0	COG0558@1|root,COG0558@2|Bacteria,2GK5D@201174|Actinobacteria,4D4I7@85005|Actinomycetales	201174|Actinobacteria	I	Belongs to the CDP-alcohol phosphatidyltransferase class-I family	pgsA	GO:0003674,GO:0003824,GO:0005575,GO:0005618,GO:0005623,GO:0006629,GO:0006644,GO:0006650,GO:0006793,GO:0006796,GO:0008150,GO:0008152,GO:0008444,GO:0008610,GO:0008654,GO:0009058,GO:0009987,GO:0016740,GO:0016772,GO:0016780,GO:0017169,GO:0019637,GO:0030312,GO:0040007,GO:0044237,GO:0044238,GO:0044249,GO:0044255,GO:0044464,GO:0045017,GO:0046474,GO:0046486,GO:0071704,GO:0071944,GO:0090407,GO:1901576	2.7.8.41,2.7.8.5	ko:K00995,ko:K08744	ko00564,ko01100,map00564,map01100	-	R01801,R02030	RC00002,RC00017,RC02795	ko00000,ko00001,ko01000	-	-	-	CDP-OH_P_transf
Bu5_04180	644284.Arch_0645	1.85e-77	237.0	COG0558@1|root,COG0558@2|Bacteria,2GK5D@201174|Actinobacteria,4D4I7@85005|Actinomycetales	201174|Actinobacteria	I	Belongs to the CDP-alcohol phosphatidyltransferase class-I family	pgsA	GO:0003674,GO:0003824,GO:0005575,GO:0005618,GO:0005623,GO:0006629,GO:0006644,GO:0006650,GO:0006793,GO:0006796,GO:0008150,GO:0008152,GO:0008444,GO:0008610,GO:0008654,GO:0009058,GO:0009987,GO:0016740,GO:0016772,GO:0016780,GO:0017169,GO:0019637,GO:0030312,GO:0040007,GO:0044237,GO:0044238,GO:0044249,GO:0044255,GO:0044464,GO:0045017,GO:0046474,GO:0046486,GO:0071704,GO:0071944,GO:0090407,GO:1901576	2.7.8.41,2.7.8.5	ko:K00995,ko:K08744	ko00564,ko01100,map00564,map01100	-	R01801,R02030	RC00002,RC00017,RC02795	ko00000,ko00001,ko01000	-	-	-	CDP-OH_P_transf
DSM_20630_03930	644284.Arch_0645	3.21e-78	239.0	COG0558@1|root,COG0558@2|Bacteria,2GK5D@201174|Actinobacteria,4D4I7@85005|Actinomycetales	201174|Actinobacteria	I	Belongs to the CDP-alcohol phosphatidyltransferase class-I family	pgsA	GO:0003674,GO:0003824,GO:0005575,GO:0005618,GO:0005623,GO:0006629,GO:0006644,GO:0006650,GO:0006793,GO:0006796,GO:0008150,GO:0008152,GO:0008444,GO:0008610,GO:0008654,GO:0009058,GO:0009987,GO:0016740,GO:0016772,GO:0016780,GO:0017169,GO:0019637,GO:0030312,GO:0040007,GO:0044237,GO:0044238,GO:0044249,GO:0044255,GO:0044464,GO:0045017,GO:0046474,GO:0046486,GO:0071704,GO:0071944,GO:0090407,GO:1901576	2.7.8.41,2.7.8.5	ko:K00995,ko:K08744	ko00564,ko01100,map00564,map01100	-	R01801,R02030	RC00002,RC00017,RC02795	ko00000,ko00001,ko01000	-	-	-	CDP-OH_P_transf
MS249_01435	644284.Arch_0645	3.21e-78	239.0	COG0558@1|root,COG0558@2|Bacteria,2GK5D@201174|Actinobacteria,4D4I7@85005|Actinomycetales	201174|Actinobacteria	I	Belongs to the CDP-alcohol phosphatidyltransferase class-I family	pgsA	GO:0003674,GO:0003824,GO:0005575,GO:0005618,GO:0005623,GO:0006629,GO:0006644,GO:0006650,GO:0006793,GO:0006796,GO:0008150,GO:0008152,GO:0008444,GO:0008610,GO:0008654,GO:0009058,GO:0009987,GO:0016740,GO:0016772,GO:0016780,GO:0017169,GO:0019637,GO:0030312,GO:0040007,GO:0044237,GO:0044238,GO:0044249,GO:0044255,GO:0044464,GO:0045017,GO:0046474,GO:0046486,GO:0071704,GO:0071944,GO:0090407,GO:1901576	2.7.8.41,2.7.8.5	ko:K00995,ko:K08744	ko00564,ko01100,map00564,map01100	-	R01801,R02030	RC00002,RC00017,RC02795	ko00000,ko00001,ko01000	-	-	-	CDP-OH_P_transf
NCTC5224_06325	644284.Arch_0645	3.21e-78	239.0	COG0558@1|root,COG0558@2|Bacteria,2GK5D@201174|Actinobacteria,4D4I7@85005|Actinomycetales	201174|Actinobacteria	I	Belongs to the CDP-alcohol phosphatidyltransferase class-I family	pgsA	GO:0003674,GO:0003824,GO:0005575,GO:0005618,GO:0005623,GO:0006629,GO:0006644,GO:0006650,GO:0006793,GO:0006796,GO:0008150,GO:0008152,GO:0008444,GO:0008610,GO:0008654,GO:0009058,GO:0009987,GO:0016740,GO:0016772,GO:0016780,GO:0017169,GO:0019637,GO:0030312,GO:0040007,GO:0044237,GO:0044238,GO:0044249,GO:0044255,GO:0044464,GO:0045017,GO:0046474,GO:0046486,GO:0071704,GO:0071944,GO:0090407,GO:1901576	2.7.8.41,2.7.8.5	ko:K00995,ko:K08744	ko00564,ko01100,map00564,map01100	-	R01801,R02030	RC00002,RC00017,RC02795	ko00000,ko00001,ko01000	-	-	-	CDP-OH_P_transf
SH01_07660	644284.Arch_0645	3.21e-78	239.0	COG0558@1|root,COG0558@2|Bacteria,2GK5D@201174|Actinobacteria,4D4I7@85005|Actinomycetales	201174|Actinobacteria	I	Belongs to the CDP-alcohol phosphatidyltransferase class-I family	pgsA	GO:0003674,GO:0003824,GO:0005575,GO:0005618,GO:0005623,GO:0006629,GO:0006644,GO:0006650,GO:0006793,GO:0006796,GO:0008150,GO:0008152,GO:0008444,GO:0008610,GO:0008654,GO:0009058,GO:0009987,GO:0016740,GO:0016772,GO:0016780,GO:0017169,GO:0019637,GO:0030312,GO:0040007,GO:0044237,GO:0044238,GO:0044249,GO:0044255,GO:0044464,GO:0045017,GO:0046474,GO:0046486,GO:0071704,GO:0071944,GO:0090407,GO:1901576	2.7.8.41,2.7.8.5	ko:K00995,ko:K08744	ko00564,ko01100,map00564,map01100	-	R01801,R02030	RC00002,RC00017,RC02795	ko00000,ko00001,ko01000	-	-	-	CDP-OH_P_transf
SH02_04725	644284.Arch_0645	3.72e-77	236.0	COG0558@1|root,COG0558@2|Bacteria,2GK5D@201174|Actinobacteria,4D4I7@85005|Actinomycetales	201174|Actinobacteria	I	Belongs to the CDP-alcohol phosphatidyltransferase class-I family	pgsA	GO:0003674,GO:0003824,GO:0005575,GO:0005618,GO:0005623,GO:0006629,GO:0006644,GO:0006650,GO:0006793,GO:0006796,GO:0008150,GO:0008152,GO:0008444,GO:0008610,GO:0008654,GO:0009058,GO:0009987,GO:0016740,GO:0016772,GO:0016780,GO:0017169,GO:0019637,GO:0030312,GO:0040007,GO:0044237,GO:0044238,GO:0044249,GO:0044255,GO:0044464,GO:0045017,GO:0046474,GO:0046486,GO:0071704,GO:0071944,GO:0090407,GO:1901576	2.7.8.41,2.7.8.5	ko:K00995,ko:K08744	ko00564,ko01100,map00564,map01100	-	R01801,R02030	RC00002,RC00017,RC02795	ko00000,ko00001,ko01000	-	-	-	CDP-OH_P_transf
SH03_01640	644284.Arch_0645	3.72e-77	236.0	COG0558@1|root,COG0558@2|Bacteria,2GK5D@201174|Actinobacteria,4D4I7@85005|Actinomycetales	201174|Actinobacteria	I	Belongs to the CDP-alcohol phosphatidyltransferase class-I family	pgsA	GO:0003674,GO:0003824,GO:0005575,GO:0005618,GO:0005623,GO:0006629,GO:0006644,GO:0006650,GO:0006793,GO:0006796,GO:0008150,GO:0008152,GO:0008444,GO:0008610,GO:0008654,GO:0009058,GO:0009987,GO:0016740,GO:0016772,GO:0016780,GO:0017169,GO:0019637,GO:0030312,GO:0040007,GO:0044237,GO:0044238,GO:0044249,GO:0044255,GO:0044464,GO:0045017,GO:0046474,GO:0046486,GO:0071704,GO:0071944,GO:0090407,GO:1901576	2.7.8.41,2.7.8.5	ko:K00995,ko:K08744	ko00564,ko01100,map00564,map01100	-	R01801,R02030	RC00002,RC00017,RC02795	ko00000,ko00001,ko01000	-	-	-	CDP-OH_P_transf
TP1_02240	644284.Arch_0645	1.85e-77	237.0	COG0558@1|root,COG0558@2|Bacteria,2GK5D@201174|Actinobacteria,4D4I7@85005|Actinomycetales	201174|Actinobacteria	I	Belongs to the CDP-alcohol phosphatidyltransferase class-I family	pgsA	GO:0003674,GO:0003824,GO:0005575,GO:0005618,GO:0005623,GO:0006629,GO:0006644,GO:0006650,GO:0006793,GO:0006796,GO:0008150,GO:0008152,GO:0008444,GO:0008610,GO:0008654,GO:0009058,GO:0009987,GO:0016740,GO:0016772,GO:0016780,GO:0017169,GO:0019637,GO:0030312,GO:0040007,GO:0044237,GO:0044238,GO:0044249,GO:0044255,GO:0044464,GO:0045017,GO:0046474,GO:0046486,GO:0071704,GO:0071944,GO:0090407,GO:1901576	2.7.8.41,2.7.8.5	ko:K00995,ko:K08744	ko00564,ko01100,map00564,map01100	-	R01801,R02030	RC00002,RC00017,RC02795	ko00000,ko00001,ko01000	-	-	-	CDP-OH_P_transf
TP2_08105	644284.Arch_0645	3.72e-77	236.0	COG0558@1|root,COG0558@2|Bacteria,2GK5D@201174|Actinobacteria,4D4I7@85005|Actinomycetales	201174|Actinobacteria	I	Belongs to the CDP-alcohol phosphatidyltransferase class-I family	pgsA	GO:0003674,GO:0003824,GO:0005575,GO:0005618,GO:0005623,GO:0006629,GO:0006644,GO:0006650,GO:0006793,GO:0006796,GO:0008150,GO:0008152,GO:0008444,GO:0008610,GO:0008654,GO:0009058,GO:0009987,GO:0016740,GO:0016772,GO:0016780,GO:0017169,GO:0019637,GO:0030312,GO:0040007,GO:0044237,GO:0044238,GO:0044249,GO:0044255,GO:0044464,GO:0045017,GO:0046474,GO:0046486,GO:0071704,GO:0071944,GO:0090407,GO:1901576	2.7.8.41,2.7.8.5	ko:K00995,ko:K08744	ko00564,ko01100,map00564,map01100	-	R01801,R02030	RC00002,RC00017,RC02795	ko00000,ko00001,ko01000	-	-	-	CDP-OH_P_transf
TP3_04465	644284.Arch_0645	2.26e-78	239.0	COG0558@1|root,COG0558@2|Bacteria,2GK5D@201174|Actinobacteria,4D4I7@85005|Actinomycetales	201174|Actinobacteria	I	Belongs to the CDP-alcohol phosphatidyltransferase class-I family	pgsA	GO:0003674,GO:0003824,GO:0005575,GO:0005618,GO:0005623,GO:0006629,GO:0006644,GO:0006650,GO:0006793,GO:0006796,GO:0008150,GO:0008152,GO:0008444,GO:0008610,GO:0008654,GO:0009058,GO:0009987,GO:0016740,GO:0016772,GO:0016780,GO:0017169,GO:0019637,GO:0030312,GO:0040007,GO:0044237,GO:0044238,GO:0044249,GO:0044255,GO:0044464,GO:0045017,GO:0046474,GO:0046486,GO:0071704,GO:0071944,GO:0090407,GO:1901576	2.7.8.41,2.7.8.5	ko:K00995,ko:K08744	ko00564,ko01100,map00564,map01100	-	R01801,R02030	RC00002,RC00017,RC02795	ko00000,ko00001,ko01000	-	-	-	CDP-OH_P_transf
TP4_00180	644284.Arch_0645	3.21e-78	239.0	COG0558@1|root,COG0558@2|Bacteria,2GK5D@201174|Actinobacteria,4D4I7@85005|Actinomycetales	201174|Actinobacteria	I	Belongs to the CDP-alcohol phosphatidyltransferase class-I family	pgsA	GO:0003674,GO:0003824,GO:0005575,GO:0005618,GO:0005623,GO:0006629,GO:0006644,GO:0006650,GO:0006793,GO:0006796,GO:0008150,GO:0008152,GO:0008444,GO:0008610,GO:0008654,GO:0009058,GO:0009987,GO:0016740,GO:0016772,GO:0016780,GO:0017169,GO:0019637,GO:0030312,GO:0040007,GO:0044237,GO:0044238,GO:0044249,GO:0044255,GO:0044464,GO:0045017,GO:0046474,GO:0046486,GO:0071704,GO:0071944,GO:0090407,GO:1901576	2.7.8.41,2.7.8.5	ko:K00995,ko:K08744	ko00564,ko01100,map00564,map01100	-	R01801,R02030	RC00002,RC00017,RC02795	ko00000,ko00001,ko01000	-	-	-	CDP-OH_P_transf
TP4479_10810	644284.Arch_0645	2.26e-78	239.0	COG0558@1|root,COG0558@2|Bacteria,2GK5D@201174|Actinobacteria,4D4I7@85005|Actinomycetales	201174|Actinobacteria	I	Belongs to the CDP-alcohol phosphatidyltransferase class-I family	pgsA	GO:0003674,GO:0003824,GO:0005575,GO:0005618,GO:0005623,GO:0006629,GO:0006644,GO:0006650,GO:0006793,GO:0006796,GO:0008150,GO:0008152,GO:0008444,GO:0008610,GO:0008654,GO:0009058,GO:0009987,GO:0016740,GO:0016772,GO:0016780,GO:0017169,GO:0019637,GO:0030312,GO:0040007,GO:0044237,GO:0044238,GO:0044249,GO:0044255,GO:0044464,GO:0045017,GO:0046474,GO:0046486,GO:0071704,GO:0071944,GO:0090407,GO:1901576	2.7.8.41,2.7.8.5	ko:K00995,ko:K08744	ko00564,ko01100,map00564,map01100	-	R01801,R02030	RC00002,RC00017,RC02795	ko00000,ko00001,ko01000	-	-	-	CDP-OH_P_transf
TP8_06850	644284.Arch_0645	1.3e-77	238.0	COG0558@1|root,COG0558@2|Bacteria,2GK5D@201174|Actinobacteria,4D4I7@85005|Actinomycetales	201174|Actinobacteria	I	Belongs to the CDP-alcohol phosphatidyltransferase class-I family	pgsA	GO:0003674,GO:0003824,GO:0005575,GO:0005618,GO:0005623,GO:0006629,GO:0006644,GO:0006650,GO:0006793,GO:0006796,GO:0008150,GO:0008152,GO:0008444,GO:0008610,GO:0008654,GO:0009058,GO:0009987,GO:0016740,GO:0016772,GO:0016780,GO:0017169,GO:0019637,GO:0030312,GO:0040007,GO:0044237,GO:0044238,GO:0044249,GO:0044255,GO:0044464,GO:0045017,GO:0046474,GO:0046486,GO:0071704,GO:0071944,GO:0090407,GO:1901576	2.7.8.41,2.7.8.5	ko:K00995,ko:K08744	ko00564,ko01100,map00564,map01100	-	R01801,R02030	RC00002,RC00017,RC02795	ko00000,ko00001,ko01000	-	-	-	CDP-OH_P_transf
TP_2849_01865	644284.Arch_0645	2.26e-78	239.0	COG0558@1|root,COG0558@2|Bacteria,2GK5D@201174|Actinobacteria,4D4I7@85005|Actinomycetales	201174|Actinobacteria	I	Belongs to the CDP-alcohol phosphatidyltransferase class-I family	pgsA	GO:0003674,GO:0003824,GO:0005575,GO:0005618,GO:0005623,GO:0006629,GO:0006644,GO:0006650,GO:0006793,GO:0006796,GO:0008150,GO:0008152,GO:0008444,GO:0008610,GO:0008654,GO:0009058,GO:0009987,GO:0016740,GO:0016772,GO:0016780,GO:0017169,GO:0019637,GO:0030312,GO:0040007,GO:0044237,GO:0044238,GO:0044249,GO:0044255,GO:0044464,GO:0045017,GO:0046474,GO:0046486,GO:0071704,GO:0071944,GO:0090407,GO:1901576	2.7.8.41,2.7.8.5	ko:K00995,ko:K08744	ko00564,ko01100,map00564,map01100	-	R01801,R02030	RC00002,RC00017,RC02795	ko00000,ko00001,ko01000	-	-	-	CDP-OH_P_transf
UFV1_05025	644284.Arch_0645	2.26e-78	239.0	COG0558@1|root,COG0558@2|Bacteria,2GK5D@201174|Actinobacteria,4D4I7@85005|Actinomycetales	201174|Actinobacteria	I	Belongs to the CDP-alcohol phosphatidyltransferase class-I family	pgsA	GO:0003674,GO:0003824,GO:0005575,GO:0005618,GO:0005623,GO:0006629,GO:0006644,GO:0006650,GO:0006793,GO:0006796,GO:0008150,GO:0008152,GO:0008444,GO:0008610,GO:0008654,GO:0009058,GO:0009987,GO:0016740,GO:0016772,GO:0016780,GO:0017169,GO:0019637,GO:0030312,GO:0040007,GO:0044237,GO:0044238,GO:0044249,GO:0044255,GO:0044464,GO:0045017,GO:0046474,GO:0046486,GO:0071704,GO:0071944,GO:0090407,GO:1901576	2.7.8.41,2.7.8.5	ko:K00995,ko:K08744	ko00564,ko01100,map00564,map01100	-	R01801,R02030	RC00002,RC00017,RC02795	ko00000,ko00001,ko01000	-	-	-	CDP-OH_P_transf
jx18_01965	644284.Arch_0645	3.21e-78	239.0	COG0558@1|root,COG0558@2|Bacteria,2GK5D@201174|Actinobacteria,4D4I7@85005|Actinomycetales	201174|Actinobacteria	I	Belongs to the CDP-alcohol phosphatidyltransferase class-I family	pgsA	GO:0003674,GO:0003824,GO:0005575,GO:0005618,GO:0005623,GO:0006629,GO:0006644,GO:0006650,GO:0006793,GO:0006796,GO:0008150,GO:0008152,GO:0008444,GO:0008610,GO:0008654,GO:0009058,GO:0009987,GO:0016740,GO:0016772,GO:0016780,GO:0017169,GO:0019637,GO:0030312,GO:0040007,GO:0044237,GO:0044238,GO:0044249,GO:0044255,GO:0044464,GO:0045017,GO:0046474,GO:0046486,GO:0071704,GO:0071944,GO:0090407,GO:1901576	2.7.8.41,2.7.8.5	ko:K00995,ko:K08744	ko00564,ko01100,map00564,map01100	-	R01801,R02030	RC00002,RC00017,RC02795	ko00000,ko00001,ko01000	-	-	-	CDP-OH_P_transf
TP6375_02050	644284.Arch_0573	2.3e-99	298.0	COG0681@1|root,COG0681@2|Bacteria,2GIYN@201174|Actinobacteria,4D3BV@85005|Actinomycetales	201174|Actinobacteria	U	Belongs to the peptidase S26 family	lepB	-	3.4.21.89	ko:K03100	ko02024,ko03060,map02024,map03060	-	-	-	ko00000,ko00001,ko01000,ko01002	-	-	-	Peptidase_S24,Peptidase_S26
2012CQ_ZSH_09640	644284.Arch_0573	2.3e-99	298.0	COG0681@1|root,COG0681@2|Bacteria,2GIYN@201174|Actinobacteria,4D3BV@85005|Actinomycetales	201174|Actinobacteria	U	Belongs to the peptidase S26 family	lepB	-	3.4.21.89	ko:K03100	ko02024,ko03060,map02024,map03060	-	-	-	ko00000,ko00001,ko01000,ko01002	-	-	-	Peptidase_S24,Peptidase_S26
Arash114_02050	644284.Arch_0573	2.3e-99	298.0	COG0681@1|root,COG0681@2|Bacteria,2GIYN@201174|Actinobacteria,4D3BV@85005|Actinomycetales	201174|Actinobacteria	U	Belongs to the peptidase S26 family	lepB	-	3.4.21.89	ko:K03100	ko02024,ko03060,map02024,map03060	-	-	-	ko00000,ko00001,ko01000,ko01002	-	-	-	Peptidase_S24,Peptidase_S26
Bu5_03905	644284.Arch_0573	6.56e-99	297.0	COG0681@1|root,COG0681@2|Bacteria,2GIYN@201174|Actinobacteria,4D3BV@85005|Actinomycetales	201174|Actinobacteria	U	Belongs to the peptidase S26 family	lepB	-	3.4.21.89	ko:K03100	ko02024,ko03060,map02024,map03060	-	-	-	ko00000,ko00001,ko01000,ko01002	-	-	-	Peptidase_S24,Peptidase_S26
DSM_20630_04835	644284.Arch_0573	2.3e-99	298.0	COG0681@1|root,COG0681@2|Bacteria,2GIYN@201174|Actinobacteria,4D3BV@85005|Actinomycetales	201174|Actinobacteria	U	Belongs to the peptidase S26 family	lepB	-	3.4.21.89	ko:K03100	ko02024,ko03060,map02024,map03060	-	-	-	ko00000,ko00001,ko01000,ko01002	-	-	-	Peptidase_S24,Peptidase_S26
MS249_02485	644284.Arch_0573	2.3e-99	298.0	COG0681@1|root,COG0681@2|Bacteria,2GIYN@201174|Actinobacteria,4D3BV@85005|Actinomycetales	201174|Actinobacteria	U	Belongs to the peptidase S26 family	lepB	-	3.4.21.89	ko:K03100	ko02024,ko03060,map02024,map03060	-	-	-	ko00000,ko00001,ko01000,ko01002	-	-	-	Peptidase_S24,Peptidase_S26
NCTC5224_06600	644284.Arch_0573	2.3e-99	298.0	COG0681@1|root,COG0681@2|Bacteria,2GIYN@201174|Actinobacteria,4D3BV@85005|Actinomycetales	201174|Actinobacteria	U	Belongs to the peptidase S26 family	lepB	-	3.4.21.89	ko:K03100	ko02024,ko03060,map02024,map03060	-	-	-	ko00000,ko00001,ko01000,ko01002	-	-	-	Peptidase_S24,Peptidase_S26
SH01_07380	644284.Arch_0573	2.3e-99	298.0	COG0681@1|root,COG0681@2|Bacteria,2GIYN@201174|Actinobacteria,4D3BV@85005|Actinomycetales	201174|Actinobacteria	U	Belongs to the peptidase S26 family	lepB	-	3.4.21.89	ko:K03100	ko02024,ko03060,map02024,map03060	-	-	-	ko00000,ko00001,ko01000,ko01002	-	-	-	Peptidase_S24,Peptidase_S26
SH02_05000	644284.Arch_0573	2.3e-99	298.0	COG0681@1|root,COG0681@2|Bacteria,2GIYN@201174|Actinobacteria,4D3BV@85005|Actinomycetales	201174|Actinobacteria	U	Belongs to the peptidase S26 family	lepB	-	3.4.21.89	ko:K03100	ko02024,ko03060,map02024,map03060	-	-	-	ko00000,ko00001,ko01000,ko01002	-	-	-	Peptidase_S24,Peptidase_S26
SH03_01915	644284.Arch_0573	2.3e-99	298.0	COG0681@1|root,COG0681@2|Bacteria,2GIYN@201174|Actinobacteria,4D3BV@85005|Actinomycetales	201174|Actinobacteria	U	Belongs to the peptidase S26 family	lepB	-	3.4.21.89	ko:K03100	ko02024,ko03060,map02024,map03060	-	-	-	ko00000,ko00001,ko01000,ko01002	-	-	-	Peptidase_S24,Peptidase_S26
TP1_01965	644284.Arch_0573	2.3e-99	298.0	COG0681@1|root,COG0681@2|Bacteria,2GIYN@201174|Actinobacteria,4D3BV@85005|Actinomycetales	201174|Actinobacteria	U	Belongs to the peptidase S26 family	lepB	-	3.4.21.89	ko:K03100	ko02024,ko03060,map02024,map03060	-	-	-	ko00000,ko00001,ko01000,ko01002	-	-	-	Peptidase_S24,Peptidase_S26
TP2_07835	644284.Arch_0573	2.3e-99	298.0	COG0681@1|root,COG0681@2|Bacteria,2GIYN@201174|Actinobacteria,4D3BV@85005|Actinomycetales	201174|Actinobacteria	U	Belongs to the peptidase S26 family	lepB	-	3.4.21.89	ko:K03100	ko02024,ko03060,map02024,map03060	-	-	-	ko00000,ko00001,ko01000,ko01002	-	-	-	Peptidase_S24,Peptidase_S26
TP3_04745	644284.Arch_0573	2.3e-99	298.0	COG0681@1|root,COG0681@2|Bacteria,2GIYN@201174|Actinobacteria,4D3BV@85005|Actinomycetales	201174|Actinobacteria	U	Belongs to the peptidase S26 family	lepB	-	3.4.21.89	ko:K03100	ko02024,ko03060,map02024,map03060	-	-	-	ko00000,ko00001,ko01000,ko01002	-	-	-	Peptidase_S24,Peptidase_S26
TP4_11070	644284.Arch_0573	2.3e-99	298.0	COG0681@1|root,COG0681@2|Bacteria,2GIYN@201174|Actinobacteria,4D3BV@85005|Actinomycetales	201174|Actinobacteria	U	Belongs to the peptidase S26 family	lepB	-	3.4.21.89	ko:K03100	ko02024,ko03060,map02024,map03060	-	-	-	ko00000,ko00001,ko01000,ko01002	-	-	-	Peptidase_S24,Peptidase_S26
TP4479_00220	644284.Arch_0573	2.3e-99	298.0	COG0681@1|root,COG0681@2|Bacteria,2GIYN@201174|Actinobacteria,4D3BV@85005|Actinomycetales	201174|Actinobacteria	U	Belongs to the peptidase S26 family	lepB	-	3.4.21.89	ko:K03100	ko02024,ko03060,map02024,map03060	-	-	-	ko00000,ko00001,ko01000,ko01002	-	-	-	Peptidase_S24,Peptidase_S26
TP8_07140	644284.Arch_0573	4.62e-99	297.0	COG0681@1|root,COG0681@2|Bacteria,2GIYN@201174|Actinobacteria,4D3BV@85005|Actinomycetales	201174|Actinobacteria	U	Belongs to the peptidase S26 family	lepB	-	3.4.21.89	ko:K03100	ko02024,ko03060,map02024,map03060	-	-	-	ko00000,ko00001,ko01000,ko01002	-	-	-	Peptidase_S24,Peptidase_S26
TP_2849_02145	644284.Arch_0573	2.3e-99	298.0	COG0681@1|root,COG0681@2|Bacteria,2GIYN@201174|Actinobacteria,4D3BV@85005|Actinomycetales	201174|Actinobacteria	U	Belongs to the peptidase S26 family	lepB	-	3.4.21.89	ko:K03100	ko02024,ko03060,map02024,map03060	-	-	-	ko00000,ko00001,ko01000,ko01002	-	-	-	Peptidase_S24,Peptidase_S26
UFV1_04490	644284.Arch_0573	2.3e-99	298.0	COG0681@1|root,COG0681@2|Bacteria,2GIYN@201174|Actinobacteria,4D3BV@85005|Actinomycetales	201174|Actinobacteria	U	Belongs to the peptidase S26 family	lepB	-	3.4.21.89	ko:K03100	ko02024,ko03060,map02024,map03060	-	-	-	ko00000,ko00001,ko01000,ko01002	-	-	-	Peptidase_S24,Peptidase_S26
jx18_01690	644284.Arch_0573	4.62e-99	297.0	COG0681@1|root,COG0681@2|Bacteria,2GIYN@201174|Actinobacteria,4D3BV@85005|Actinomycetales	201174|Actinobacteria	U	Belongs to the peptidase S26 family	lepB	-	3.4.21.89	ko:K03100	ko02024,ko03060,map02024,map03060	-	-	-	ko00000,ko00001,ko01000,ko01002	-	-	-	Peptidase_S24,Peptidase_S26
TP6375_02910	888050.HMPREF9004_1789	1.27e-194	561.0	COG0803@1|root,COG0803@2|Bacteria,2HNG7@201174|Actinobacteria,4D3B3@85005|Actinomycetales	201174|Actinobacteria	P	Belongs to the bacterial solute-binding protein 9 family	-	-	-	-	-	-	-	-	-	-	-	-	ZnuA
2012CQ_ZSH_07295	888050.HMPREF9004_1789	2.56e-194	561.0	COG0803@1|root,COG0803@2|Bacteria,2HNG7@201174|Actinobacteria,4D3B3@85005|Actinomycetales	201174|Actinobacteria	P	Belongs to the bacterial solute-binding protein 9 family	-	-	-	-	-	-	-	-	-	-	-	-	ZnuA
Arash114_02905	888050.HMPREF9004_1789	3.62e-194	560.0	COG0803@1|root,COG0803@2|Bacteria,2HNG7@201174|Actinobacteria,4D3B3@85005|Actinomycetales	201174|Actinobacteria	P	Belongs to the bacterial solute-binding protein 9 family	-	-	-	-	-	-	-	-	-	-	-	-	ZnuA
Bu5_03130	888050.HMPREF9004_1789	1.27e-194	561.0	COG0803@1|root,COG0803@2|Bacteria,2HNG7@201174|Actinobacteria,4D3B3@85005|Actinomycetales	201174|Actinobacteria	P	Belongs to the bacterial solute-binding protein 9 family	-	-	-	-	-	-	-	-	-	-	-	-	ZnuA
DSM_20630_01895	888050.HMPREF9004_1789	5.13e-194	560.0	COG0803@1|root,COG0803@2|Bacteria,2HNG7@201174|Actinobacteria,4D3B3@85005|Actinomycetales	201174|Actinobacteria	P	Belongs to the bacterial solute-binding protein 9 family	-	-	-	-	-	-	-	-	-	-	-	-	ZnuA
MS249_02860	888050.HMPREF9004_1789	1.27e-194	561.0	COG0803@1|root,COG0803@2|Bacteria,2HNG7@201174|Actinobacteria,4D3B3@85005|Actinomycetales	201174|Actinobacteria	P	Belongs to the bacterial solute-binding protein 9 family	-	-	-	-	-	-	-	-	-	-	-	-	ZnuA
NCTC5224_04285	888050.HMPREF9004_1789	5.13e-194	560.0	COG0803@1|root,COG0803@2|Bacteria,2HNG7@201174|Actinobacteria,4D3B3@85005|Actinomycetales	201174|Actinobacteria	P	Belongs to the bacterial solute-binding protein 9 family	-	-	-	-	-	-	-	-	-	-	-	-	ZnuA
SH01_04410	888050.HMPREF9004_1789	5.13e-194	560.0	COG0803@1|root,COG0803@2|Bacteria,2HNG7@201174|Actinobacteria,4D3B3@85005|Actinomycetales	201174|Actinobacteria	P	Belongs to the bacterial solute-binding protein 9 family	-	-	-	-	-	-	-	-	-	-	-	-	ZnuA
SH02_02800	888050.HMPREF9004_1789	5.13e-194	560.0	COG0803@1|root,COG0803@2|Bacteria,2HNG7@201174|Actinobacteria,4D3B3@85005|Actinomycetales	201174|Actinobacteria	P	Belongs to the bacterial solute-binding protein 9 family	-	-	-	-	-	-	-	-	-	-	-	-	ZnuA
SH03_02715	888050.HMPREF9004_1789	5.13e-194	560.0	COG0803@1|root,COG0803@2|Bacteria,2HNG7@201174|Actinobacteria,4D3B3@85005|Actinomycetales	201174|Actinobacteria	P	Belongs to the bacterial solute-binding protein 9 family	-	-	-	-	-	-	-	-	-	-	-	-	ZnuA
TP1_04250	888050.HMPREF9004_1789	1.27e-194	561.0	COG0803@1|root,COG0803@2|Bacteria,2HNG7@201174|Actinobacteria,4D3B3@85005|Actinomycetales	201174|Actinobacteria	P	Belongs to the bacterial solute-binding protein 9 family	-	-	-	-	-	-	-	-	-	-	-	-	ZnuA
TP2_10245	888050.HMPREF9004_1789	1.27e-194	561.0	COG0803@1|root,COG0803@2|Bacteria,2HNG7@201174|Actinobacteria,4D3B3@85005|Actinomycetales	201174|Actinobacteria	P	Belongs to the bacterial solute-binding protein 9 family	-	-	-	-	-	-	-	-	-	-	-	-	ZnuA
TP3_02430	888050.HMPREF9004_1789	8.98e-195	562.0	COG0803@1|root,COG0803@2|Bacteria,2HNG7@201174|Actinobacteria,4D3B3@85005|Actinomycetales	201174|Actinobacteria	P	Belongs to the bacterial solute-binding protein 9 family	-	-	-	-	-	-	-	-	-	-	-	-	ZnuA
TP4_02215	888050.HMPREF9004_1789	5.13e-194	560.0	COG0803@1|root,COG0803@2|Bacteria,2HNG7@201174|Actinobacteria,4D3B3@85005|Actinomycetales	201174|Actinobacteria	P	Belongs to the bacterial solute-binding protein 9 family	-	-	-	-	-	-	-	-	-	-	-	-	ZnuA
TP4479_08775	888050.HMPREF9004_1789	8.98e-195	562.0	COG0803@1|root,COG0803@2|Bacteria,2HNG7@201174|Actinobacteria,4D3B3@85005|Actinomycetales	201174|Actinobacteria	P	Belongs to the bacterial solute-binding protein 9 family	-	-	-	-	-	-	-	-	-	-	-	-	ZnuA
TP8_04780	888050.HMPREF9004_1789	2.56e-194	561.0	COG0803@1|root,COG0803@2|Bacteria,2HNG7@201174|Actinobacteria,4D3B3@85005|Actinomycetales	201174|Actinobacteria	P	Belongs to the bacterial solute-binding protein 9 family	-	-	-	-	-	-	-	-	-	-	-	-	ZnuA
TP_2849_10710	888050.HMPREF9004_1789	8.98e-195	562.0	COG0803@1|root,COG0803@2|Bacteria,2HNG7@201174|Actinobacteria,4D3B3@85005|Actinomycetales	201174|Actinobacteria	P	Belongs to the bacterial solute-binding protein 9 family	-	-	-	-	-	-	-	-	-	-	-	-	ZnuA
UFV1_10240	888050.HMPREF9004_1789	1.27e-194	561.0	COG0803@1|root,COG0803@2|Bacteria,2HNG7@201174|Actinobacteria,4D3B3@85005|Actinomycetales	201174|Actinobacteria	P	Belongs to the bacterial solute-binding protein 9 family	-	-	-	-	-	-	-	-	-	-	-	-	ZnuA
jx18_03995	888050.HMPREF9004_1789	8.98e-195	562.0	COG0803@1|root,COG0803@2|Bacteria,2HNG7@201174|Actinobacteria,4D3B3@85005|Actinomycetales	201174|Actinobacteria	P	Belongs to the bacterial solute-binding protein 9 family	-	-	-	-	-	-	-	-	-	-	-	-	ZnuA
TP6375_04855	644284.Arch_1400	6.74e-134	383.0	COG0081@1|root,COG0081@2|Bacteria,2GM51@201174|Actinobacteria,4D320@85005|Actinomycetales	201174|Actinobacteria	J	Binds directly to 23S rRNA. The L1 stalk is quite mobile in the ribosome, and is involved in E site tRNA release	rplA	GO:0000470,GO:0003674,GO:0003676,GO:0003723,GO:0005488,GO:0005575,GO:0005618,GO:0005622,GO:0005623,GO:0005737,GO:0005829,GO:0005840,GO:0005886,GO:0006139,GO:0006364,GO:0006396,GO:0006412,GO:0006518,GO:0006725,GO:0006807,GO:0008150,GO:0008152,GO:0009058,GO:0009059,GO:0009987,GO:0010467,GO:0015934,GO:0016020,GO:0016070,GO:0016072,GO:0019538,GO:0022613,GO:0022625,GO:0022626,GO:0030312,GO:0032991,GO:…	-	ko:K02863	ko03010,map03010	M00178,M00179	-	-	br01610,ko00000,ko00001,ko00002,ko03011	-	-	-	Ribosomal_L1
2012CQ_ZSH_05660	644284.Arch_1400	1.42e-135	387.0	COG0081@1|root,COG0081@2|Bacteria,2GM51@201174|Actinobacteria,4D320@85005|Actinomycetales	201174|Actinobacteria	J	Binds directly to 23S rRNA. The L1 stalk is quite mobile in the ribosome, and is involved in E site tRNA release	rplA	GO:0000470,GO:0003674,GO:0003676,GO:0003723,GO:0005488,GO:0005575,GO:0005618,GO:0005622,GO:0005623,GO:0005737,GO:0005829,GO:0005840,GO:0005886,GO:0006139,GO:0006364,GO:0006396,GO:0006412,GO:0006518,GO:0006725,GO:0006807,GO:0008150,GO:0008152,GO:0009058,GO:0009059,GO:0009987,GO:0010467,GO:0015934,GO:0016020,GO:0016070,GO:0016072,GO:0019538,GO:0022613,GO:0022625,GO:0022626,GO:0030312,GO:0032991,GO:…	-	ko:K02863	ko03010,map03010	M00178,M00179	-	-	br01610,ko00000,ko00001,ko00002,ko03011	-	-	-	Ribosomal_L1
Arash114_04855	644284.Arch_1400	1.66e-134	384.0	COG0081@1|root,COG0081@2|Bacteria,2GM51@201174|Actinobacteria,4D320@85005|Actinomycetales	201174|Actinobacteria	J	Binds directly to 23S rRNA. The L1 stalk is quite mobile in the ribosome, and is involved in E site tRNA release	rplA	GO:0000470,GO:0003674,GO:0003676,GO:0003723,GO:0005488,GO:0005575,GO:0005618,GO:0005622,GO:0005623,GO:0005737,GO:0005829,GO:0005840,GO:0005886,GO:0006139,GO:0006364,GO:0006396,GO:0006412,GO:0006518,GO:0006725,GO:0006807,GO:0008150,GO:0008152,GO:0009058,GO:0009059,GO:0009987,GO:0010467,GO:0015934,GO:0016020,GO:0016070,GO:0016072,GO:0019538,GO:0022613,GO:0022625,GO:0022626,GO:0030312,GO:0032991,GO:…	-	ko:K02863	ko03010,map03010	M00178,M00179	-	-	br01610,ko00000,ko00001,ko00002,ko03011	-	-	-	Ribosomal_L1
Bu5_01540	644284.Arch_1400	1.66e-134	384.0	COG0081@1|root,COG0081@2|Bacteria,2GM51@201174|Actinobacteria,4D320@85005|Actinomycetales	201174|Actinobacteria	J	Binds directly to 23S rRNA. The L1 stalk is quite mobile in the ribosome, and is involved in E site tRNA release	rplA	GO:0000470,GO:0003674,GO:0003676,GO:0003723,GO:0005488,GO:0005575,GO:0005618,GO:0005622,GO:0005623,GO:0005737,GO:0005829,GO:0005840,GO:0005886,GO:0006139,GO:0006364,GO:0006396,GO:0006412,GO:0006518,GO:0006725,GO:0006807,GO:0008150,GO:0008152,GO:0009058,GO:0009059,GO:0009987,GO:0010467,GO:0015934,GO:0016020,GO:0016070,GO:0016072,GO:0019538,GO:0022613,GO:0022625,GO:0022626,GO:0030312,GO:0032991,GO:…	-	ko:K02863	ko03010,map03010	M00178,M00179	-	-	br01610,ko00000,ko00001,ko00002,ko03011	-	-	-	Ribosomal_L1
DSM_20630_00245	644284.Arch_1400	1.42e-135	387.0	COG0081@1|root,COG0081@2|Bacteria,2GM51@201174|Actinobacteria,4D320@85005|Actinomycetales	201174|Actinobacteria	J	Binds directly to 23S rRNA. The L1 stalk is quite mobile in the ribosome, and is involved in E site tRNA release	rplA	GO:0000470,GO:0003674,GO:0003676,GO:0003723,GO:0005488,GO:0005575,GO:0005618,GO:0005622,GO:0005623,GO:0005737,GO:0005829,GO:0005840,GO:0005886,GO:0006139,GO:0006364,GO:0006396,GO:0006412,GO:0006518,GO:0006725,GO:0006807,GO:0008150,GO:0008152,GO:0009058,GO:0009059,GO:0009987,GO:0010467,GO:0015934,GO:0016020,GO:0016070,GO:0016072,GO:0019538,GO:0022613,GO:0022625,GO:0022626,GO:0030312,GO:0032991,GO:…	-	ko:K02863	ko03010,map03010	M00178,M00179	-	-	br01610,ko00000,ko00001,ko00002,ko03011	-	-	-	Ribosomal_L1
MS249_02045	644284.Arch_1400	1.66e-134	384.0	COG0081@1|root,COG0081@2|Bacteria,2GM51@201174|Actinobacteria,4D320@85005|Actinomycetales	201174|Actinobacteria	J	Binds directly to 23S rRNA. The L1 stalk is quite mobile in the ribosome, and is involved in E site tRNA release	rplA	GO:0000470,GO:0003674,GO:0003676,GO:0003723,GO:0005488,GO:0005575,GO:0005618,GO:0005622,GO:0005623,GO:0005737,GO:0005829,GO:0005840,GO:0005886,GO:0006139,GO:0006364,GO:0006396,GO:0006412,GO:0006518,GO:0006725,GO:0006807,GO:0008150,GO:0008152,GO:0009058,GO:0009059,GO:0009987,GO:0010467,GO:0015934,GO:0016020,GO:0016070,GO:0016072,GO:0019538,GO:0022613,GO:0022625,GO:0022626,GO:0030312,GO:0032991,GO:…	-	ko:K02863	ko03010,map03010	M00178,M00179	-	-	br01610,ko00000,ko00001,ko00002,ko03011	-	-	-	Ribosomal_L1
NCTC5224_02645	644284.Arch_1400	1.42e-135	387.0	COG0081@1|root,COG0081@2|Bacteria,2GM51@201174|Actinobacteria,4D320@85005|Actinomycetales	201174|Actinobacteria	J	Binds directly to 23S rRNA. The L1 stalk is quite mobile in the ribosome, and is involved in E site tRNA release	rplA	GO:0000470,GO:0003674,GO:0003676,GO:0003723,GO:0005488,GO:0005575,GO:0005618,GO:0005622,GO:0005623,GO:0005737,GO:0005829,GO:0005840,GO:0005886,GO:0006139,GO:0006364,GO:0006396,GO:0006412,GO:0006518,GO:0006725,GO:0006807,GO:0008150,GO:0008152,GO:0009058,GO:0009059,GO:0009987,GO:0010467,GO:0015934,GO:0016020,GO:0016070,GO:0016072,GO:0019538,GO:0022613,GO:0022625,GO:0022626,GO:0030312,GO:0032991,GO:…	-	ko:K02863	ko03010,map03010	M00178,M00179	-	-	br01610,ko00000,ko00001,ko00002,ko03011	-	-	-	Ribosomal_L1
SH01_01520	644284.Arch_1400	1.66e-134	384.0	COG0081@1|root,COG0081@2|Bacteria,2GM51@201174|Actinobacteria,4D320@85005|Actinomycetales	201174|Actinobacteria	J	Binds directly to 23S rRNA. The L1 stalk is quite mobile in the ribosome, and is involved in E site tRNA release	rplA	GO:0000470,GO:0003674,GO:0003676,GO:0003723,GO:0005488,GO:0005575,GO:0005618,GO:0005622,GO:0005623,GO:0005737,GO:0005829,GO:0005840,GO:0005886,GO:0006139,GO:0006364,GO:0006396,GO:0006412,GO:0006518,GO:0006725,GO:0006807,GO:0008150,GO:0008152,GO:0009058,GO:0009059,GO:0009987,GO:0010467,GO:0015934,GO:0016020,GO:0016070,GO:0016072,GO:0019538,GO:0022613,GO:0022625,GO:0022626,GO:0030312,GO:0032991,GO:…	-	ko:K02863	ko03010,map03010	M00178,M00179	-	-	br01610,ko00000,ko00001,ko00002,ko03011	-	-	-	Ribosomal_L1
SH02_00285	644284.Arch_1400	1.66e-134	384.0	COG0081@1|root,COG0081@2|Bacteria,2GM51@201174|Actinobacteria,4D320@85005|Actinomycetales	201174|Actinobacteria	J	Binds directly to 23S rRNA. The L1 stalk is quite mobile in the ribosome, and is involved in E site tRNA release	rplA	GO:0000470,GO:0003674,GO:0003676,GO:0003723,GO:0005488,GO:0005575,GO:0005618,GO:0005622,GO:0005623,GO:0005737,GO:0005829,GO:0005840,GO:0005886,GO:0006139,GO:0006364,GO:0006396,GO:0006412,GO:0006518,GO:0006725,GO:0006807,GO:0008150,GO:0008152,GO:0009058,GO:0009059,GO:0009987,GO:0010467,GO:0015934,GO:0016020,GO:0016070,GO:0016072,GO:0019538,GO:0022613,GO:0022625,GO:0022626,GO:0030312,GO:0032991,GO:…	-	ko:K02863	ko03010,map03010	M00178,M00179	-	-	br01610,ko00000,ko00001,ko00002,ko03011	-	-	-	Ribosomal_L1
SH03_07255	644284.Arch_1400	1.66e-134	384.0	COG0081@1|root,COG0081@2|Bacteria,2GM51@201174|Actinobacteria,4D320@85005|Actinomycetales	201174|Actinobacteria	J	Binds directly to 23S rRNA. The L1 stalk is quite mobile in the ribosome, and is involved in E site tRNA release	rplA	GO:0000470,GO:0003674,GO:0003676,GO:0003723,GO:0005488,GO:0005575,GO:0005618,GO:0005622,GO:0005623,GO:0005737,GO:0005829,GO:0005840,GO:0005886,GO:0006139,GO:0006364,GO:0006396,GO:0006412,GO:0006518,GO:0006725,GO:0006807,GO:0008150,GO:0008152,GO:0009058,GO:0009059,GO:0009987,GO:0010467,GO:0015934,GO:0016020,GO:0016070,GO:0016072,GO:0019538,GO:0022613,GO:0022625,GO:0022626,GO:0030312,GO:0032991,GO:…	-	ko:K02863	ko03010,map03010	M00178,M00179	-	-	br01610,ko00000,ko00001,ko00002,ko03011	-	-	-	Ribosomal_L1
TP1_05910	644284.Arch_1400	1.66e-134	384.0	COG0081@1|root,COG0081@2|Bacteria,2GM51@201174|Actinobacteria,4D320@85005|Actinomycetales	201174|Actinobacteria	J	Binds directly to 23S rRNA. The L1 stalk is quite mobile in the ribosome, and is involved in E site tRNA release	rplA	GO:0000470,GO:0003674,GO:0003676,GO:0003723,GO:0005488,GO:0005575,GO:0005618,GO:0005622,GO:0005623,GO:0005737,GO:0005829,GO:0005840,GO:0005886,GO:0006139,GO:0006364,GO:0006396,GO:0006412,GO:0006518,GO:0006725,GO:0006807,GO:0008150,GO:0008152,GO:0009058,GO:0009059,GO:0009987,GO:0010467,GO:0015934,GO:0016020,GO:0016070,GO:0016072,GO:0019538,GO:0022613,GO:0022625,GO:0022626,GO:0030312,GO:0032991,GO:…	-	ko:K02863	ko03010,map03010	M00178,M00179	-	-	br01610,ko00000,ko00001,ko00002,ko03011	-	-	-	Ribosomal_L1
TP2_01490	644284.Arch_1400	1.66e-134	384.0	COG0081@1|root,COG0081@2|Bacteria,2GM51@201174|Actinobacteria,4D320@85005|Actinomycetales	201174|Actinobacteria	J	Binds directly to 23S rRNA. The L1 stalk is quite mobile in the ribosome, and is involved in E site tRNA release	rplA	GO:0000470,GO:0003674,GO:0003676,GO:0003723,GO:0005488,GO:0005575,GO:0005618,GO:0005622,GO:0005623,GO:0005737,GO:0005829,GO:0005840,GO:0005886,GO:0006139,GO:0006364,GO:0006396,GO:0006412,GO:0006518,GO:0006725,GO:0006807,GO:0008150,GO:0008152,GO:0009058,GO:0009059,GO:0009987,GO:0010467,GO:0015934,GO:0016020,GO:0016070,GO:0016072,GO:0019538,GO:0022613,GO:0022625,GO:0022626,GO:0030312,GO:0032991,GO:…	-	ko:K02863	ko03010,map03010	M00178,M00179	-	-	br01610,ko00000,ko00001,ko00002,ko03011	-	-	-	Ribosomal_L1
TP3_00610	644284.Arch_1400	1.66e-134	384.0	COG0081@1|root,COG0081@2|Bacteria,2GM51@201174|Actinobacteria,4D320@85005|Actinomycetales	201174|Actinobacteria	J	Binds directly to 23S rRNA. The L1 stalk is quite mobile in the ribosome, and is involved in E site tRNA release	rplA	GO:0000470,GO:0003674,GO:0003676,GO:0003723,GO:0005488,GO:0005575,GO:0005618,GO:0005622,GO:0005623,GO:0005737,GO:0005829,GO:0005840,GO:0005886,GO:0006139,GO:0006364,GO:0006396,GO:0006412,GO:0006518,GO:0006725,GO:0006807,GO:0008150,GO:0008152,GO:0009058,GO:0009059,GO:0009987,GO:0010467,GO:0015934,GO:0016020,GO:0016070,GO:0016072,GO:0019538,GO:0022613,GO:0022625,GO:0022626,GO:0030312,GO:0032991,GO:…	-	ko:K02863	ko03010,map03010	M00178,M00179	-	-	br01610,ko00000,ko00001,ko00002,ko03011	-	-	-	Ribosomal_L1
TP4_04385	644284.Arch_1400	1.66e-134	384.0	COG0081@1|root,COG0081@2|Bacteria,2GM51@201174|Actinobacteria,4D320@85005|Actinomycetales	201174|Actinobacteria	J	Binds directly to 23S rRNA. The L1 stalk is quite mobile in the ribosome, and is involved in E site tRNA release	rplA	GO:0000470,GO:0003674,GO:0003676,GO:0003723,GO:0005488,GO:0005575,GO:0005618,GO:0005622,GO:0005623,GO:0005737,GO:0005829,GO:0005840,GO:0005886,GO:0006139,GO:0006364,GO:0006396,GO:0006412,GO:0006518,GO:0006725,GO:0006807,GO:0008150,GO:0008152,GO:0009058,GO:0009059,GO:0009987,GO:0010467,GO:0015934,GO:0016020,GO:0016070,GO:0016072,GO:0019538,GO:0022613,GO:0022625,GO:0022626,GO:0030312,GO:0032991,GO:…	-	ko:K02863	ko03010,map03010	M00178,M00179	-	-	br01610,ko00000,ko00001,ko00002,ko03011	-	-	-	Ribosomal_L1
TP4479_06960	644284.Arch_1400	1.66e-134	384.0	COG0081@1|root,COG0081@2|Bacteria,2GM51@201174|Actinobacteria,4D320@85005|Actinomycetales	201174|Actinobacteria	J	Binds directly to 23S rRNA. The L1 stalk is quite mobile in the ribosome, and is involved in E site tRNA release	rplA	GO:0000470,GO:0003674,GO:0003676,GO:0003723,GO:0005488,GO:0005575,GO:0005618,GO:0005622,GO:0005623,GO:0005737,GO:0005829,GO:0005840,GO:0005886,GO:0006139,GO:0006364,GO:0006396,GO:0006412,GO:0006518,GO:0006725,GO:0006807,GO:0008150,GO:0008152,GO:0009058,GO:0009059,GO:0009987,GO:0010467,GO:0015934,GO:0016020,GO:0016070,GO:0016072,GO:0019538,GO:0022613,GO:0022625,GO:0022626,GO:0030312,GO:0032991,GO:…	-	ko:K02863	ko03010,map03010	M00178,M00179	-	-	br01610,ko00000,ko00001,ko00002,ko03011	-	-	-	Ribosomal_L1
TP8_02895	644284.Arch_1400	1.42e-135	387.0	COG0081@1|root,COG0081@2|Bacteria,2GM51@201174|Actinobacteria,4D320@85005|Actinomycetales	201174|Actinobacteria	J	Binds directly to 23S rRNA. The L1 stalk is quite mobile in the ribosome, and is involved in E site tRNA release	rplA	GO:0000470,GO:0003674,GO:0003676,GO:0003723,GO:0005488,GO:0005575,GO:0005618,GO:0005622,GO:0005623,GO:0005737,GO:0005829,GO:0005840,GO:0005886,GO:0006139,GO:0006364,GO:0006396,GO:0006412,GO:0006518,GO:0006725,GO:0006807,GO:0008150,GO:0008152,GO:0009058,GO:0009059,GO:0009987,GO:0010467,GO:0015934,GO:0016020,GO:0016070,GO:0016072,GO:0019538,GO:0022613,GO:0022625,GO:0022626,GO:0030312,GO:0032991,GO:…	-	ko:K02863	ko03010,map03010	M00178,M00179	-	-	br01610,ko00000,ko00001,ko00002,ko03011	-	-	-	Ribosomal_L1
TP_2849_08895	644284.Arch_1400	1.66e-134	384.0	COG0081@1|root,COG0081@2|Bacteria,2GM51@201174|Actinobacteria,4D320@85005|Actinomycetales	201174|Actinobacteria	J	Binds directly to 23S rRNA. The L1 stalk is quite mobile in the ribosome, and is involved in E site tRNA release	rplA	GO:0000470,GO:0003674,GO:0003676,GO:0003723,GO:0005488,GO:0005575,GO:0005618,GO:0005622,GO:0005623,GO:0005737,GO:0005829,GO:0005840,GO:0005886,GO:0006139,GO:0006364,GO:0006396,GO:0006412,GO:0006518,GO:0006725,GO:0006807,GO:0008150,GO:0008152,GO:0009058,GO:0009059,GO:0009987,GO:0010467,GO:0015934,GO:0016020,GO:0016070,GO:0016072,GO:0019538,GO:0022613,GO:0022625,GO:0022626,GO:0030312,GO:0032991,GO:…	-	ko:K02863	ko03010,map03010	M00178,M00179	-	-	br01610,ko00000,ko00001,ko00002,ko03011	-	-	-	Ribosomal_L1
UFV1_01150	644284.Arch_1400	6.74e-134	383.0	COG0081@1|root,COG0081@2|Bacteria,2GM51@201174|Actinobacteria,4D320@85005|Actinomycetales	201174|Actinobacteria	J	Binds directly to 23S rRNA. The L1 stalk is quite mobile in the ribosome, and is involved in E site tRNA release	rplA	GO:0000470,GO:0003674,GO:0003676,GO:0003723,GO:0005488,GO:0005575,GO:0005618,GO:0005622,GO:0005623,GO:0005737,GO:0005829,GO:0005840,GO:0005886,GO:0006139,GO:0006364,GO:0006396,GO:0006412,GO:0006518,GO:0006725,GO:0006807,GO:0008150,GO:0008152,GO:0009058,GO:0009059,GO:0009987,GO:0010467,GO:0015934,GO:0016020,GO:0016070,GO:0016072,GO:0019538,GO:0022613,GO:0022625,GO:0022626,GO:0030312,GO:0032991,GO:…	-	ko:K02863	ko03010,map03010	M00178,M00179	-	-	br01610,ko00000,ko00001,ko00002,ko03011	-	-	-	Ribosomal_L1
jx18_06050	644284.Arch_1400	1.66e-134	384.0	COG0081@1|root,COG0081@2|Bacteria,2GM51@201174|Actinobacteria,4D320@85005|Actinomycetales	201174|Actinobacteria	J	Binds directly to 23S rRNA. The L1 stalk is quite mobile in the ribosome, and is involved in E site tRNA release	rplA	GO:0000470,GO:0003674,GO:0003676,GO:0003723,GO:0005488,GO:0005575,GO:0005618,GO:0005622,GO:0005623,GO:0005737,GO:0005829,GO:0005840,GO:0005886,GO:0006139,GO:0006364,GO:0006396,GO:0006412,GO:0006518,GO:0006725,GO:0006807,GO:0008150,GO:0008152,GO:0009058,GO:0009059,GO:0009987,GO:0010467,GO:0015934,GO:0016020,GO:0016070,GO:0016072,GO:0019538,GO:0022613,GO:0022625,GO:0022626,GO:0030312,GO:0032991,GO:…	-	ko:K02863	ko03010,map03010	M00178,M00179	-	-	br01610,ko00000,ko00001,ko00002,ko03011	-	-	-	Ribosomal_L1
TP6375_05970	644284.Arch_1124	6.06e-131	388.0	COG0628@1|root,COG0628@2|Bacteria,2GK0H@201174|Actinobacteria,4D3Z9@85005|Actinomycetales	201174|Actinobacteria	S	cog cog0628	-	-	-	-	-	-	-	-	-	-	-	-	AI-2E_transport
2012CQ_ZSH_04595	644284.Arch_1124	7.47e-132	390.0	COG0628@1|root,COG0628@2|Bacteria,2GK0H@201174|Actinobacteria,4D3Z9@85005|Actinomycetales	201174|Actinobacteria	S	cog cog0628	-	-	-	-	-	-	-	-	-	-	-	-	AI-2E_transport
Arash114_05990	644284.Arch_1124	7.47e-132	390.0	COG0628@1|root,COG0628@2|Bacteria,2GK0H@201174|Actinobacteria,4D3Z9@85005|Actinomycetales	201174|Actinobacteria	S	cog cog0628	-	-	-	-	-	-	-	-	-	-	-	-	AI-2E_transport
Bu5_00420	644284.Arch_1124	1.5e-131	390.0	COG0628@1|root,COG0628@2|Bacteria,2GK0H@201174|Actinobacteria,4D3Z9@85005|Actinomycetales	201174|Actinobacteria	S	cog cog0628	-	-	-	-	-	-	-	-	-	-	-	-	AI-2E_transport
DSM_20630_08900	644284.Arch_1124	7.47e-132	390.0	COG0628@1|root,COG0628@2|Bacteria,2GK0H@201174|Actinobacteria,4D3Z9@85005|Actinomycetales	201174|Actinobacteria	S	cog cog0628	-	-	-	-	-	-	-	-	-	-	-	-	AI-2E_transport
MS249_07215	644284.Arch_1124	1.06e-136	403.0	COG0628@1|root,COG0628@2|Bacteria,2GK0H@201174|Actinobacteria,4D3Z9@85005|Actinomycetales	201174|Actinobacteria	S	cog cog0628	-	-	-	-	-	-	-	-	-	-	-	-	AI-2E_transport
NCTC5224_01555	644284.Arch_1124	7.47e-132	390.0	COG0628@1|root,COG0628@2|Bacteria,2GK0H@201174|Actinobacteria,4D3Z9@85005|Actinomycetales	201174|Actinobacteria	S	cog cog0628	-	-	-	-	-	-	-	-	-	-	-	-	AI-2E_transport
SH01_00440	644284.Arch_1124	2.13e-131	389.0	COG0628@1|root,COG0628@2|Bacteria,2GK0H@201174|Actinobacteria,4D3Z9@85005|Actinomycetales	201174|Actinobacteria	S	cog cog0628	-	-	-	-	-	-	-	-	-	-	-	-	AI-2E_transport
SH02_01375	644284.Arch_1124	7.47e-132	390.0	COG0628@1|root,COG0628@2|Bacteria,2GK0H@201174|Actinobacteria,4D3Z9@85005|Actinomycetales	201174|Actinobacteria	S	cog cog0628	-	-	-	-	-	-	-	-	-	-	-	-	AI-2E_transport
SH03_08340	644284.Arch_1124	7.47e-132	390.0	COG0628@1|root,COG0628@2|Bacteria,2GK0H@201174|Actinobacteria,4D3Z9@85005|Actinomycetales	201174|Actinobacteria	S	cog cog0628	-	-	-	-	-	-	-	-	-	-	-	-	AI-2E_transport
TP1_07010	644284.Arch_1124	3.72e-132	391.0	COG0628@1|root,COG0628@2|Bacteria,2GK0H@201174|Actinobacteria,4D3Z9@85005|Actinomycetales	201174|Actinobacteria	S	cog cog0628	-	-	-	-	-	-	-	-	-	-	-	-	AI-2E_transport
TP2_02580	644284.Arch_1124	6.06e-131	388.0	COG0628@1|root,COG0628@2|Bacteria,2GK0H@201174|Actinobacteria,4D3Z9@85005|Actinomycetales	201174|Actinobacteria	S	cog cog0628	-	-	-	-	-	-	-	-	-	-	-	-	AI-2E_transport
TP3_10370	644284.Arch_1124	7.47e-132	390.0	COG0628@1|root,COG0628@2|Bacteria,2GK0H@201174|Actinobacteria,4D3Z9@85005|Actinomycetales	201174|Actinobacteria	S	cog cog0628	-	-	-	-	-	-	-	-	-	-	-	-	AI-2E_transport
TP4_05465	644284.Arch_1124	7.47e-132	390.0	COG0628@1|root,COG0628@2|Bacteria,2GK0H@201174|Actinobacteria,4D3Z9@85005|Actinomycetales	201174|Actinobacteria	S	cog cog0628	-	-	-	-	-	-	-	-	-	-	-	-	AI-2E_transport
TP4479_05850	644284.Arch_1124	7.47e-132	390.0	COG0628@1|root,COG0628@2|Bacteria,2GK0H@201174|Actinobacteria,4D3Z9@85005|Actinomycetales	201174|Actinobacteria	S	cog cog0628	-	-	-	-	-	-	-	-	-	-	-	-	AI-2E_transport
TP8_01760	644284.Arch_1124	7.47e-132	390.0	COG0628@1|root,COG0628@2|Bacteria,2GK0H@201174|Actinobacteria,4D3Z9@85005|Actinomycetales	201174|Actinobacteria	S	cog cog0628	-	-	-	-	-	-	-	-	-	-	-	-	AI-2E_transport
TP_2849_07785	644284.Arch_1124	7.47e-132	390.0	COG0628@1|root,COG0628@2|Bacteria,2GK0H@201174|Actinobacteria,4D3Z9@85005|Actinomycetales	201174|Actinobacteria	S	cog cog0628	-	-	-	-	-	-	-	-	-	-	-	-	AI-2E_transport
UFV1_09755	644284.Arch_1124	6.06e-131	388.0	COG0628@1|root,COG0628@2|Bacteria,2GK0H@201174|Actinobacteria,4D3Z9@85005|Actinomycetales	201174|Actinobacteria	S	cog cog0628	-	-	-	-	-	-	-	-	-	-	-	-	AI-2E_transport
jx18_07135	644284.Arch_1124	7.47e-132	390.0	COG0628@1|root,COG0628@2|Bacteria,2GK0H@201174|Actinobacteria,4D3Z9@85005|Actinomycetales	201174|Actinobacteria	S	cog cog0628	-	-	-	-	-	-	-	-	-	-	-	-	AI-2E_transport
TP6375_07490	1219585.HMPREF1631_04090	3.95e-255	736.0	COG0737@1|root,COG0737@2|Bacteria,2GKC3@201174|Actinobacteria,4D38X@85005|Actinomycetales	201174|Actinobacteria	F	Belongs to the 5'-nucleotidase family	-	-	3.1.3.5	ko:K01081	ko00230,ko00240,ko00760,ko01100,ko01110,map00230,map00240,map00760,map01100,map01110	-	R00183,R00511,R00963,R01126,R01227,R01569,R01664,R01968,R02088,R02102,R02323,R02719,R03346	RC00017	ko00000,ko00001,ko01000	-	-	-	5_nucleotid_C,Metallophos
2012CQ_ZSH_03100	1219585.HMPREF1631_04090	1e-263	758.0	COG0737@1|root,COG0737@2|Bacteria,2GKC3@201174|Actinobacteria,4D38X@85005|Actinomycetales	201174|Actinobacteria	F	Belongs to the 5'-nucleotidase family	-	-	3.1.3.5	ko:K01081	ko00230,ko00240,ko00760,ko01100,ko01110,map00230,map00240,map00760,map01100,map01110	-	R00183,R00511,R00963,R01126,R01227,R01569,R01664,R01968,R02088,R02102,R02323,R02719,R03346	RC00017	ko00000,ko00001,ko01000	-	-	-	5_nucleotid_C,Metallophos
Arash114_07520	1219585.HMPREF1631_04090	3.46e-256	739.0	COG0737@1|root,COG0737@2|Bacteria,2GKC3@201174|Actinobacteria,4D38X@85005|Actinomycetales	201174|Actinobacteria	F	Belongs to the 5'-nucleotidase family	-	-	3.1.3.5	ko:K01081	ko00230,ko00240,ko00760,ko01100,ko01110,map00230,map00240,map00760,map01100,map01110	-	R00183,R00511,R00963,R01126,R01227,R01569,R01664,R01968,R02088,R02102,R02323,R02719,R03346	RC00017	ko00000,ko00001,ko01000	-	-	-	5_nucleotid_C,Metallophos
Bu5_07730	1219585.HMPREF1631_04090	2.57e-264	760.0	COG0737@1|root,COG0737@2|Bacteria,2GKC3@201174|Actinobacteria,4D38X@85005|Actinomycetales	201174|Actinobacteria	F	Belongs to the 5'-nucleotidase family	-	-	3.1.3.5	ko:K01081	ko00230,ko00240,ko00760,ko01100,ko01110,map00230,map00240,map00760,map01100,map01110	-	R00183,R00511,R00963,R01126,R01227,R01569,R01664,R01968,R02088,R02102,R02323,R02719,R03346	RC00017	ko00000,ko00001,ko01000	-	-	-	5_nucleotid_C,Metallophos
DSM_20630_09370	1219585.HMPREF1631_04090	2.44e-256	739.0	COG0737@1|root,COG0737@2|Bacteria,2GKC3@201174|Actinobacteria,4D38X@85005|Actinomycetales	201174|Actinobacteria	F	Belongs to the 5'-nucleotidase family	-	-	3.1.3.5	ko:K01081	ko00230,ko00240,ko00760,ko01100,ko01110,map00230,map00240,map00760,map01100,map01110	-	R00183,R00511,R00963,R01126,R01227,R01569,R01664,R01968,R02088,R02102,R02323,R02719,R03346	RC00017	ko00000,ko00001,ko01000	-	-	-	5_nucleotid_C,Metallophos
MS249_02965	1219585.HMPREF1631_04090	3.29e-254	734.0	COG0737@1|root,COG0737@2|Bacteria,2GKC3@201174|Actinobacteria,4D38X@85005|Actinomycetales	201174|Actinobacteria	F	Belongs to the 5'-nucleotidase family	-	-	3.1.3.5	ko:K01081	ko00230,ko00240,ko00760,ko01100,ko01110,map00230,map00240,map00760,map01100,map01110	-	R00183,R00511,R00963,R01126,R01227,R01569,R01664,R01968,R02088,R02102,R02323,R02719,R03346	RC00017	ko00000,ko00001,ko01000	-	-	-	5_nucleotid_C,Metallophos
NCTC5224_10370	1219585.HMPREF1631_04090	2.44e-256	739.0	COG0737@1|root,COG0737@2|Bacteria,2GKC3@201174|Actinobacteria,4D38X@85005|Actinomycetales	201174|Actinobacteria	F	Belongs to the 5'-nucleotidase family	-	-	3.1.3.5	ko:K01081	ko00230,ko00240,ko00760,ko01100,ko01110,map00230,map00240,map00760,map01100,map01110	-	R00183,R00511,R00963,R01126,R01227,R01569,R01664,R01968,R02088,R02102,R02323,R02719,R03346	RC00017	ko00000,ko00001,ko01000	-	-	-	5_nucleotid_C,Metallophos
SH01_02460	1219585.HMPREF1631_04090	4.37e-265	761.0	COG0737@1|root,COG0737@2|Bacteria,2GKC3@201174|Actinobacteria,4D38X@85005|Actinomycetales	201174|Actinobacteria	F	Belongs to the 5'-nucleotidase family	-	-	3.1.3.5	ko:K01081	ko00230,ko00240,ko00760,ko01100,ko01110,map00230,map00240,map00760,map01100,map01110	-	R00183,R00511,R00963,R01126,R01227,R01569,R01664,R01968,R02088,R02102,R02323,R02719,R03346	RC00017	ko00000,ko00001,ko01000	-	-	-	5_nucleotid_C,Metallophos
SH02_07985	1219585.HMPREF1631_04090	4.37e-265	761.0	COG0737@1|root,COG0737@2|Bacteria,2GKC3@201174|Actinobacteria,4D38X@85005|Actinomycetales	201174|Actinobacteria	F	Belongs to the 5'-nucleotidase family	-	-	3.1.3.5	ko:K01081	ko00230,ko00240,ko00760,ko01100,ko01110,map00230,map00240,map00760,map01100,map01110	-	R00183,R00511,R00963,R01126,R01227,R01569,R01664,R01968,R02088,R02102,R02323,R02719,R03346	RC00017	ko00000,ko00001,ko01000	-	-	-	5_nucleotid_C,Metallophos
SH03_03695	1219585.HMPREF1631_04090	4.37e-265	761.0	COG0737@1|root,COG0737@2|Bacteria,2GKC3@201174|Actinobacteria,4D38X@85005|Actinomycetales	201174|Actinobacteria	F	Belongs to the 5'-nucleotidase family	-	-	3.1.3.5	ko:K01081	ko00230,ko00240,ko00760,ko01100,ko01110,map00230,map00240,map00760,map01100,map01110	-	R00183,R00511,R00963,R01126,R01227,R01569,R01664,R01968,R02088,R02102,R02323,R02719,R03346	RC00017	ko00000,ko00001,ko01000	-	-	-	5_nucleotid_C,Metallophos
TP1_08510	1219585.HMPREF1631_04090	1.25e-260	750.0	COG0737@1|root,COG0737@2|Bacteria,2GKC3@201174|Actinobacteria,4D38X@85005|Actinomycetales	201174|Actinobacteria	F	Belongs to the 5'-nucleotidase family	-	-	3.1.3.5	ko:K01081	ko00230,ko00240,ko00760,ko01100,ko01110,map00230,map00240,map00760,map01100,map01110	-	R00183,R00511,R00963,R01126,R01227,R01569,R01664,R01968,R02088,R02102,R02323,R02719,R03346	RC00017	ko00000,ko00001,ko01000	-	-	-	5_nucleotid_C,Metallophos
TP2_04175	1219585.HMPREF1631_04090	2.37e-262	755.0	COG0737@1|root,COG0737@2|Bacteria,2GKC3@201174|Actinobacteria,4D38X@85005|Actinomycetales	201174|Actinobacteria	F	Belongs to the 5'-nucleotidase family	-	-	3.1.3.5	ko:K01081	ko00230,ko00240,ko00760,ko01100,ko01110,map00230,map00240,map00760,map01100,map01110	-	R00183,R00511,R00963,R01126,R01227,R01569,R01664,R01968,R02088,R02102,R02323,R02719,R03346	RC00017	ko00000,ko00001,ko01000	-	-	-	5_nucleotid_C,Metallophos
TP3_08895	1219585.HMPREF1631_04090	9.36e-265	761.0	COG0737@1|root,COG0737@2|Bacteria,2GKC3@201174|Actinobacteria,4D38X@85005|Actinomycetales	201174|Actinobacteria	F	Belongs to the 5'-nucleotidase family	-	-	3.1.3.5	ko:K01081	ko00230,ko00240,ko00760,ko01100,ko01110,map00230,map00240,map00760,map01100,map01110	-	R00183,R00511,R00963,R01126,R01227,R01569,R01664,R01968,R02088,R02102,R02323,R02719,R03346	RC00017	ko00000,ko00001,ko01000	-	-	-	5_nucleotid_C,Metallophos
TP4_06950	1219585.HMPREF1631_04090	4.37e-265	761.0	COG0737@1|root,COG0737@2|Bacteria,2GKC3@201174|Actinobacteria,4D38X@85005|Actinomycetales	201174|Actinobacteria	F	Belongs to the 5'-nucleotidase family	-	-	3.1.3.5	ko:K01081	ko00230,ko00240,ko00760,ko01100,ko01110,map00230,map00240,map00760,map01100,map01110	-	R00183,R00511,R00963,R01126,R01227,R01569,R01664,R01968,R02088,R02102,R02323,R02719,R03346	RC00017	ko00000,ko00001,ko01000	-	-	-	5_nucleotid_C,Metallophos
TP4479_04375	1219585.HMPREF1631_04090	9.36e-265	761.0	COG0737@1|root,COG0737@2|Bacteria,2GKC3@201174|Actinobacteria,4D38X@85005|Actinomycetales	201174|Actinobacteria	F	Belongs to the 5'-nucleotidase family	-	-	3.1.3.5	ko:K01081	ko00230,ko00240,ko00760,ko01100,ko01110,map00230,map00240,map00760,map01100,map01110	-	R00183,R00511,R00963,R01126,R01227,R01569,R01664,R01968,R02088,R02102,R02323,R02719,R03346	RC00017	ko00000,ko00001,ko01000	-	-	-	5_nucleotid_C,Metallophos
TP8_00170	1219585.HMPREF1631_04090	1e-263	758.0	COG0737@1|root,COG0737@2|Bacteria,2GKC3@201174|Actinobacteria,4D38X@85005|Actinomycetales	201174|Actinobacteria	F	Belongs to the 5'-nucleotidase family	-	-	3.1.3.5	ko:K01081	ko00230,ko00240,ko00760,ko01100,ko01110,map00230,map00240,map00760,map01100,map01110	-	R00183,R00511,R00963,R01126,R01227,R01569,R01664,R01968,R02088,R02102,R02323,R02719,R03346	RC00017	ko00000,ko00001,ko01000	-	-	-	5_nucleotid_C,Metallophos
TP_2849_06310	1219585.HMPREF1631_04090	9.36e-265	761.0	COG0737@1|root,COG0737@2|Bacteria,2GKC3@201174|Actinobacteria,4D38X@85005|Actinomycetales	201174|Actinobacteria	F	Belongs to the 5'-nucleotidase family	-	-	3.1.3.5	ko:K01081	ko00230,ko00240,ko00760,ko01100,ko01110,map00230,map00240,map00760,map01100,map01110	-	R00183,R00511,R00963,R01126,R01227,R01569,R01664,R01968,R02088,R02102,R02323,R02719,R03346	RC00017	ko00000,ko00001,ko01000	-	-	-	5_nucleotid_C,Metallophos
UFV1_06905	1219585.HMPREF1631_04090	1.04e-240	694.0	COG0737@1|root,COG0737@2|Bacteria,2GKC3@201174|Actinobacteria,4D38X@85005|Actinomycetales	201174|Actinobacteria	F	Belongs to the 5'-nucleotidase family	-	-	3.1.3.5	ko:K01081	ko00230,ko00240,ko00760,ko01100,ko01110,map00230,map00240,map00760,map01100,map01110	-	R00183,R00511,R00963,R01126,R01227,R01569,R01664,R01968,R02088,R02102,R02323,R02719,R03346	RC00017	ko00000,ko00001,ko01000	-	-	-	5_nucleotid_C,Metallophos
jx18_08875	1219585.HMPREF1631_04090	4.37e-265	761.0	COG0737@1|root,COG0737@2|Bacteria,2GKC3@201174|Actinobacteria,4D38X@85005|Actinomycetales	201174|Actinobacteria	F	Belongs to the 5'-nucleotidase family	-	-	3.1.3.5	ko:K01081	ko00230,ko00240,ko00760,ko01100,ko01110,map00230,map00240,map00760,map01100,map01110	-	R00183,R00511,R00963,R01126,R01227,R01569,R01664,R01968,R02088,R02102,R02323,R02719,R03346	RC00017	ko00000,ko00001,ko01000	-	-	-	5_nucleotid_C,Metallophos
TP6375_08290	1064537.AGSO01000010_gene2659	4.05e-69	220.0	COG0725@1|root,COG0725@2|Bacteria,2GMPF@201174|Actinobacteria,4FCVS@85020|Dermabacteraceae	201174|Actinobacteria	P	Bacterial extracellular solute-binding protein	modA	GO:0003674,GO:0005488,GO:0005575,GO:0005623,GO:0008150,GO:0030288,GO:0030313,GO:0030973,GO:0031975,GO:0040007,GO:0042597,GO:0043167,GO:0043168,GO:0044110,GO:0044116,GO:0044117,GO:0044119,GO:0044403,GO:0044419,GO:0044464,GO:0051704	-	ko:K02020	ko02010,map02010	M00189	-	-	ko00000,ko00001,ko00002,ko02000	3.A.1.8	-	-	SBP_bac_11
2012CQ_ZSH_02290	1284680.HMPREF1627_02925	2.37e-68	219.0	COG0725@1|root,COG0725@2|Bacteria,2GMPF@201174|Actinobacteria,4D4TS@85005|Actinomycetales	201174|Actinobacteria	P	molybdate ABC transporter, periplasmic molybdate-binding protein	modA	GO:0003674,GO:0005488,GO:0005575,GO:0005623,GO:0008150,GO:0030288,GO:0030313,GO:0030973,GO:0031975,GO:0040007,GO:0042597,GO:0043167,GO:0043168,GO:0044110,GO:0044116,GO:0044117,GO:0044119,GO:0044403,GO:0044419,GO:0044464,GO:0051704	-	ko:K02020	ko02010,map02010	M00189	-	-	ko00000,ko00001,ko00002,ko02000	3.A.1.8	-	-	SBP_bac_11
Arash114_08325	1064537.AGSO01000010_gene2659	2.5e-70	223.0	COG0725@1|root,COG0725@2|Bacteria,2GMPF@201174|Actinobacteria,4FCVS@85020|Dermabacteraceae	201174|Actinobacteria	P	Bacterial extracellular solute-binding protein	modA	GO:0003674,GO:0005488,GO:0005575,GO:0005623,GO:0008150,GO:0030288,GO:0030313,GO:0030973,GO:0031975,GO:0040007,GO:0042597,GO:0043167,GO:0043168,GO:0044110,GO:0044116,GO:0044117,GO:0044119,GO:0044403,GO:0044419,GO:0044464,GO:0051704	-	ko:K02020	ko02010,map02010	M00189	-	-	ko00000,ko00001,ko00002,ko02000	3.A.1.8	-	-	SBP_bac_11
Bu5_06995	1123488.ATUF01000002_gene757	4.32e-68	218.0	COG0725@1|root,COG0725@2|Bacteria,2GMPF@201174|Actinobacteria,4D4TS@85005|Actinomycetales	201174|Actinobacteria	P	molybdate ABC transporter, periplasmic molybdate-binding protein	modA	GO:0003674,GO:0005488,GO:0005575,GO:0005623,GO:0008150,GO:0030288,GO:0030313,GO:0030973,GO:0031975,GO:0040007,GO:0042597,GO:0043167,GO:0043168,GO:0044110,GO:0044116,GO:0044117,GO:0044119,GO:0044403,GO:0044419,GO:0044464,GO:0051704	-	ko:K02020	ko02010,map02010	M00189	-	-	ko00000,ko00001,ko00002,ko02000	3.A.1.8	-	-	SBP_bac_11
DSM_20630_06150	1064537.AGSO01000010_gene2659	4.62e-68	218.0	COG0725@1|root,COG0725@2|Bacteria,2GMPF@201174|Actinobacteria,4FCVS@85020|Dermabacteraceae	201174|Actinobacteria	P	Bacterial extracellular solute-binding protein	modA	GO:0003674,GO:0005488,GO:0005575,GO:0005623,GO:0008150,GO:0030288,GO:0030313,GO:0030973,GO:0031975,GO:0040007,GO:0042597,GO:0043167,GO:0043168,GO:0044110,GO:0044116,GO:0044117,GO:0044119,GO:0044403,GO:0044419,GO:0044464,GO:0051704	-	ko:K02020	ko02010,map02010	M00189	-	-	ko00000,ko00001,ko00002,ko02000	3.A.1.8	-	-	SBP_bac_11
MS249_04140	1064537.AGSO01000010_gene2659	7.83e-69	219.0	COG0725@1|root,COG0725@2|Bacteria,2GMPF@201174|Actinobacteria,4FCVS@85020|Dermabacteraceae	201174|Actinobacteria	P	Bacterial extracellular solute-binding protein	modA	GO:0003674,GO:0005488,GO:0005575,GO:0005623,GO:0008150,GO:0030288,GO:0030313,GO:0030973,GO:0031975,GO:0040007,GO:0042597,GO:0043167,GO:0043168,GO:0044110,GO:0044116,GO:0044117,GO:0044119,GO:0044403,GO:0044419,GO:0044464,GO:0051704	-	ko:K02020	ko02010,map02010	M00189	-	-	ko00000,ko00001,ko00002,ko02000	3.A.1.8	-	-	SBP_bac_11
NCTC5224_09515	1064537.AGSO01000010_gene2659	4.62e-68	218.0	COG0725@1|root,COG0725@2|Bacteria,2GMPF@201174|Actinobacteria,4FCVS@85020|Dermabacteraceae	201174|Actinobacteria	P	Bacterial extracellular solute-binding protein	modA	GO:0003674,GO:0005488,GO:0005575,GO:0005623,GO:0008150,GO:0030288,GO:0030313,GO:0030973,GO:0031975,GO:0040007,GO:0042597,GO:0043167,GO:0043168,GO:0044110,GO:0044116,GO:0044117,GO:0044119,GO:0044403,GO:0044419,GO:0044464,GO:0051704	-	ko:K02020	ko02010,map02010	M00189	-	-	ko00000,ko00001,ko00002,ko02000	3.A.1.8	-	-	SBP_bac_11
SH01_05605	1284680.HMPREF1627_02925	1.53e-66	214.0	COG0725@1|root,COG0725@2|Bacteria,2GMPF@201174|Actinobacteria,4D4TS@85005|Actinomycetales	201174|Actinobacteria	P	molybdate ABC transporter, periplasmic molybdate-binding protein	modA	GO:0003674,GO:0005488,GO:0005575,GO:0005623,GO:0008150,GO:0030288,GO:0030313,GO:0030973,GO:0031975,GO:0040007,GO:0042597,GO:0043167,GO:0043168,GO:0044110,GO:0044116,GO:0044117,GO:0044119,GO:0044403,GO:0044419,GO:0044464,GO:0051704	-	ko:K02020	ko02010,map02010	M00189	-	-	ko00000,ko00001,ko00002,ko02000	3.A.1.8	-	-	SBP_bac_11
SH02_08830	1064537.AGSO01000010_gene2659	2.86e-69	221.0	COG0725@1|root,COG0725@2|Bacteria,2GMPF@201174|Actinobacteria,4FCVS@85020|Dermabacteraceae	201174|Actinobacteria	P	Bacterial extracellular solute-binding protein	modA	GO:0003674,GO:0005488,GO:0005575,GO:0005623,GO:0008150,GO:0030288,GO:0030313,GO:0030973,GO:0031975,GO:0040007,GO:0042597,GO:0043167,GO:0043168,GO:0044110,GO:0044116,GO:0044117,GO:0044119,GO:0044403,GO:0044419,GO:0044464,GO:0051704	-	ko:K02020	ko02010,map02010	M00189	-	-	ko00000,ko00001,ko00002,ko02000	3.A.1.8	-	-	SBP_bac_11
SH03_04585	1064537.AGSO01000010_gene2659	2.86e-69	221.0	COG0725@1|root,COG0725@2|Bacteria,2GMPF@201174|Actinobacteria,4FCVS@85020|Dermabacteraceae	201174|Actinobacteria	P	Bacterial extracellular solute-binding protein	modA	GO:0003674,GO:0005488,GO:0005575,GO:0005623,GO:0008150,GO:0030288,GO:0030313,GO:0030973,GO:0031975,GO:0040007,GO:0042597,GO:0043167,GO:0043168,GO:0044110,GO:0044116,GO:0044117,GO:0044119,GO:0044403,GO:0044419,GO:0044464,GO:0051704	-	ko:K02020	ko02010,map02010	M00189	-	-	ko00000,ko00001,ko00002,ko02000	3.A.1.8	-	-	SBP_bac_11
TP1_09300	1064537.AGSO01000010_gene2659	2.63e-67	216.0	COG0725@1|root,COG0725@2|Bacteria,2GMPF@201174|Actinobacteria,4FCVS@85020|Dermabacteraceae	201174|Actinobacteria	P	Bacterial extracellular solute-binding protein	modA	GO:0003674,GO:0005488,GO:0005575,GO:0005623,GO:0008150,GO:0030288,GO:0030313,GO:0030973,GO:0031975,GO:0040007,GO:0042597,GO:0043167,GO:0043168,GO:0044110,GO:0044116,GO:0044117,GO:0044119,GO:0044403,GO:0044419,GO:0044464,GO:0051704	-	ko:K02020	ko02010,map02010	M00189	-	-	ko00000,ko00001,ko00002,ko02000	3.A.1.8	-	-	SBP_bac_11
TP2_04965	1284680.HMPREF1627_02925	1.91e-67	216.0	COG0725@1|root,COG0725@2|Bacteria,2GMPF@201174|Actinobacteria,4D4TS@85005|Actinomycetales	201174|Actinobacteria	P	molybdate ABC transporter, periplasmic molybdate-binding protein	modA	GO:0003674,GO:0005488,GO:0005575,GO:0005623,GO:0008150,GO:0030288,GO:0030313,GO:0030973,GO:0031975,GO:0040007,GO:0042597,GO:0043167,GO:0043168,GO:0044110,GO:0044116,GO:0044117,GO:0044119,GO:0044403,GO:0044419,GO:0044464,GO:0051704	-	ko:K02020	ko02010,map02010	M00189	-	-	ko00000,ko00001,ko00002,ko02000	3.A.1.8	-	-	SBP_bac_11
TP3_08060	1284680.HMPREF1627_02925	1.53e-66	214.0	COG0725@1|root,COG0725@2|Bacteria,2GMPF@201174|Actinobacteria,4D4TS@85005|Actinomycetales	201174|Actinobacteria	P	molybdate ABC transporter, periplasmic molybdate-binding protein	modA	GO:0003674,GO:0005488,GO:0005575,GO:0005623,GO:0008150,GO:0030288,GO:0030313,GO:0030973,GO:0031975,GO:0040007,GO:0042597,GO:0043167,GO:0043168,GO:0044110,GO:0044116,GO:0044117,GO:0044119,GO:0044403,GO:0044419,GO:0044464,GO:0051704	-	ko:K02020	ko02010,map02010	M00189	-	-	ko00000,ko00001,ko00002,ko02000	3.A.1.8	-	-	SBP_bac_11
TP4_07785	1284680.HMPREF1627_02925	1.53e-66	214.0	COG0725@1|root,COG0725@2|Bacteria,2GMPF@201174|Actinobacteria,4D4TS@85005|Actinomycetales	201174|Actinobacteria	P	molybdate ABC transporter, periplasmic molybdate-binding protein	modA	GO:0003674,GO:0005488,GO:0005575,GO:0005623,GO:0008150,GO:0030288,GO:0030313,GO:0030973,GO:0031975,GO:0040007,GO:0042597,GO:0043167,GO:0043168,GO:0044110,GO:0044116,GO:0044117,GO:0044119,GO:0044403,GO:0044419,GO:0044464,GO:0051704	-	ko:K02020	ko02010,map02010	M00189	-	-	ko00000,ko00001,ko00002,ko02000	3.A.1.8	-	-	SBP_bac_11
TP4479_03540	1284680.HMPREF1627_02925	1.53e-66	214.0	COG0725@1|root,COG0725@2|Bacteria,2GMPF@201174|Actinobacteria,4D4TS@85005|Actinomycetales	201174|Actinobacteria	P	molybdate ABC transporter, periplasmic molybdate-binding protein	modA	GO:0003674,GO:0005488,GO:0005575,GO:0005623,GO:0008150,GO:0030288,GO:0030313,GO:0030973,GO:0031975,GO:0040007,GO:0042597,GO:0043167,GO:0043168,GO:0044110,GO:0044116,GO:0044117,GO:0044119,GO:0044403,GO:0044419,GO:0044464,GO:0051704	-	ko:K02020	ko02010,map02010	M00189	-	-	ko00000,ko00001,ko00002,ko02000	3.A.1.8	-	-	SBP_bac_11
TP8_09990	1284680.HMPREF1627_02925	1.36e-68	220.0	COG0725@1|root,COG0725@2|Bacteria,2GMPF@201174|Actinobacteria,4D4TS@85005|Actinomycetales	201174|Actinobacteria	P	molybdate ABC transporter, periplasmic molybdate-binding protein	modA	GO:0003674,GO:0005488,GO:0005575,GO:0005623,GO:0008150,GO:0030288,GO:0030313,GO:0030973,GO:0031975,GO:0040007,GO:0042597,GO:0043167,GO:0043168,GO:0044110,GO:0044116,GO:0044117,GO:0044119,GO:0044403,GO:0044419,GO:0044464,GO:0051704	-	ko:K02020	ko02010,map02010	M00189	-	-	ko00000,ko00001,ko00002,ko02000	3.A.1.8	-	-	SBP_bac_11
TP_2849_05475	1284680.HMPREF1627_02925	1.53e-66	214.0	COG0725@1|root,COG0725@2|Bacteria,2GMPF@201174|Actinobacteria,4D4TS@85005|Actinomycetales	201174|Actinobacteria	P	molybdate ABC transporter, periplasmic molybdate-binding protein	modA	GO:0003674,GO:0005488,GO:0005575,GO:0005623,GO:0008150,GO:0030288,GO:0030313,GO:0030973,GO:0031975,GO:0040007,GO:0042597,GO:0043167,GO:0043168,GO:0044110,GO:0044116,GO:0044117,GO:0044119,GO:0044403,GO:0044419,GO:0044464,GO:0051704	-	ko:K02020	ko02010,map02010	M00189	-	-	ko00000,ko00001,ko00002,ko02000	3.A.1.8	-	-	SBP_bac_11
UFV1_06660	1064537.AGSO01000010_gene2659	4.05e-69	220.0	COG0725@1|root,COG0725@2|Bacteria,2GMPF@201174|Actinobacteria,4FCVS@85020|Dermabacteraceae	201174|Actinobacteria	P	Bacterial extracellular solute-binding protein	modA	GO:0003674,GO:0005488,GO:0005575,GO:0005623,GO:0008150,GO:0030288,GO:0030313,GO:0030973,GO:0031975,GO:0040007,GO:0042597,GO:0043167,GO:0043168,GO:0044110,GO:0044116,GO:0044117,GO:0044119,GO:0044403,GO:0044419,GO:0044464,GO:0051704	-	ko:K02020	ko02010,map02010	M00189	-	-	ko00000,ko00001,ko00002,ko02000	3.A.1.8	-	-	SBP_bac_11
jx18_09930	1284680.HMPREF1627_02925	1.53e-66	214.0	COG0725@1|root,COG0725@2|Bacteria,2GMPF@201174|Actinobacteria,4D4TS@85005|Actinomycetales	201174|Actinobacteria	P	molybdate ABC transporter, periplasmic molybdate-binding protein	modA	GO:0003674,GO:0005488,GO:0005575,GO:0005623,GO:0008150,GO:0030288,GO:0030313,GO:0030973,GO:0031975,GO:0040007,GO:0042597,GO:0043167,GO:0043168,GO:0044110,GO:0044116,GO:0044117,GO:0044119,GO:0044403,GO:0044419,GO:0044464,GO:0051704	-	ko:K02020	ko02010,map02010	M00189	-	-	ko00000,ko00001,ko00002,ko02000	3.A.1.8	-	-	SBP_bac_11
TP6375_00555	1219585.HMPREF1631_00875	6.48e-89	274.0	COG1597@1|root,COG1597@2|Bacteria,2GK3P@201174|Actinobacteria,4D4TE@85005|Actinomycetales	201174|Actinobacteria	I	Diacylglycerol kinase	-	-	2.7.1.107	ko:K07029	ko00561,ko00564,ko01100,ko01110,map00561,map00564,map01100,map01110	-	R02240	RC00002,RC00017	ko00000,ko00001,ko01000	-	-	-	DAGK_cat
2012CQ_ZSH_08235	1219585.HMPREF1631_00875	1.14e-89	276.0	COG1597@1|root,COG1597@2|Bacteria,2GK3P@201174|Actinobacteria,4D4TE@85005|Actinomycetales	201174|Actinobacteria	I	Diacylglycerol kinase	-	-	2.7.1.107	ko:K07029	ko00561,ko00564,ko01100,ko01110,map00561,map00564,map01100,map01110	-	R02240	RC00002,RC00017	ko00000,ko00001,ko01000	-	-	-	DAGK_cat
Arash114_00550	1219585.HMPREF1631_00875	4.58e-89	275.0	COG1597@1|root,COG1597@2|Bacteria,2GK3P@201174|Actinobacteria,4D4TE@85005|Actinomycetales	201174|Actinobacteria	I	Diacylglycerol kinase	-	-	2.7.1.107	ko:K07029	ko00561,ko00564,ko01100,ko01110,map00561,map00564,map01100,map01110	-	R02240	RC00002,RC00017	ko00000,ko00001,ko01000	-	-	-	DAGK_cat
Bu5_05265	1219585.HMPREF1631_00875	2.28e-89	275.0	COG1597@1|root,COG1597@2|Bacteria,2GK3P@201174|Actinobacteria,4D4TE@85005|Actinomycetales	201174|Actinobacteria	I	Diacylglycerol kinase	-	-	2.7.1.107	ko:K07029	ko00561,ko00564,ko01100,ko01110,map00561,map00564,map01100,map01110	-	R02240	RC00002,RC00017	ko00000,ko00001,ko01000	-	-	-	DAGK_cat
DSM_20630_02835	1219585.HMPREF1631_00875	1.14e-89	276.0	COG1597@1|root,COG1597@2|Bacteria,2GK3P@201174|Actinobacteria,4D4TE@85005|Actinomycetales	201174|Actinobacteria	I	Diacylglycerol kinase	-	-	2.7.1.107	ko:K07029	ko00561,ko00564,ko01100,ko01110,map00561,map00564,map01100,map01110	-	R02240	RC00002,RC00017	ko00000,ko00001,ko01000	-	-	-	DAGK_cat
MS249_06060	1219585.HMPREF1631_00875	1.14e-89	276.0	COG1597@1|root,COG1597@2|Bacteria,2GK3P@201174|Actinobacteria,4D4TE@85005|Actinomycetales	201174|Actinobacteria	I	Diacylglycerol kinase	-	-	2.7.1.107	ko:K07029	ko00561,ko00564,ko01100,ko01110,map00561,map00564,map01100,map01110	-	R02240	RC00002,RC00017	ko00000,ko00001,ko01000	-	-	-	DAGK_cat
NCTC5224_05230	1219585.HMPREF1631_00875	1.14e-89	276.0	COG1597@1|root,COG1597@2|Bacteria,2GK3P@201174|Actinobacteria,4D4TE@85005|Actinomycetales	201174|Actinobacteria	I	Diacylglycerol kinase	-	-	2.7.1.107	ko:K07029	ko00561,ko00564,ko01100,ko01110,map00561,map00564,map01100,map01110	-	R02240	RC00002,RC00017	ko00000,ko00001,ko01000	-	-	-	DAGK_cat
SH01_09485	1219585.HMPREF1631_00875	8.02e-90	276.0	COG1597@1|root,COG1597@2|Bacteria,2GK3P@201174|Actinobacteria,4D4TE@85005|Actinomycetales	201174|Actinobacteria	I	Diacylglycerol kinase	-	-	2.7.1.107	ko:K07029	ko00561,ko00564,ko01100,ko01110,map00561,map00564,map01100,map01110	-	R02240	RC00002,RC00017	ko00000,ko00001,ko01000	-	-	-	DAGK_cat
SH02_06010	1219585.HMPREF1631_00875	9.18e-89	274.0	COG1597@1|root,COG1597@2|Bacteria,2GK3P@201174|Actinobacteria,4D4TE@85005|Actinomycetales	201174|Actinobacteria	I	Diacylglycerol kinase	-	-	2.7.1.107	ko:K07029	ko00561,ko00564,ko01100,ko01110,map00561,map00564,map01100,map01110	-	R02240	RC00002,RC00017	ko00000,ko00001,ko01000	-	-	-	DAGK_cat
SH03_00540	1219585.HMPREF1631_00875	9.18e-89	274.0	COG1597@1|root,COG1597@2|Bacteria,2GK3P@201174|Actinobacteria,4D4TE@85005|Actinomycetales	201174|Actinobacteria	I	Diacylglycerol kinase	-	-	2.7.1.107	ko:K07029	ko00561,ko00564,ko01100,ko01110,map00561,map00564,map01100,map01110	-	R02240	RC00002,RC00017	ko00000,ko00001,ko01000	-	-	-	DAGK_cat
TP1_03325	1219585.HMPREF1631_00875	1.14e-89	276.0	COG1597@1|root,COG1597@2|Bacteria,2GK3P@201174|Actinobacteria,4D4TE@85005|Actinomycetales	201174|Actinobacteria	I	Diacylglycerol kinase	-	-	2.7.1.107	ko:K07029	ko00561,ko00564,ko01100,ko01110,map00561,map00564,map01100,map01110	-	R02240	RC00002,RC00017	ko00000,ko00001,ko01000	-	-	-	DAGK_cat
TP2_09315	1219585.HMPREF1631_00875	1.49e-87	271.0	COG1597@1|root,COG1597@2|Bacteria,2GK3P@201174|Actinobacteria,4D4TE@85005|Actinomycetales	201174|Actinobacteria	I	Diacylglycerol kinase	-	-	2.7.1.107	ko:K07029	ko00561,ko00564,ko01100,ko01110,map00561,map00564,map01100,map01110	-	R02240	RC00002,RC00017	ko00000,ko00001,ko01000	-	-	-	DAGK_cat
TP3_03365	1219585.HMPREF1631_00875	9.18e-89	274.0	COG1597@1|root,COG1597@2|Bacteria,2GK3P@201174|Actinobacteria,4D4TE@85005|Actinomycetales	201174|Actinobacteria	I	Diacylglycerol kinase	-	-	2.7.1.107	ko:K07029	ko00561,ko00564,ko01100,ko01110,map00561,map00564,map01100,map01110	-	R02240	RC00002,RC00017	ko00000,ko00001,ko01000	-	-	-	DAGK_cat
TP4_01285	1219585.HMPREF1631_00875	9.18e-89	274.0	COG1597@1|root,COG1597@2|Bacteria,2GK3P@201174|Actinobacteria,4D4TE@85005|Actinomycetales	201174|Actinobacteria	I	Diacylglycerol kinase	-	-	2.7.1.107	ko:K07029	ko00561,ko00564,ko01100,ko01110,map00561,map00564,map01100,map01110	-	R02240	RC00002,RC00017	ko00000,ko00001,ko01000	-	-	-	DAGK_cat
TP4479_09710	1219585.HMPREF1631_00875	9.18e-89	274.0	COG1597@1|root,COG1597@2|Bacteria,2GK3P@201174|Actinobacteria,4D4TE@85005|Actinomycetales	201174|Actinobacteria	I	Diacylglycerol kinase	-	-	2.7.1.107	ko:K07029	ko00561,ko00564,ko01100,ko01110,map00561,map00564,map01100,map01110	-	R02240	RC00002,RC00017	ko00000,ko00001,ko01000	-	-	-	DAGK_cat
TP8_05730	1219585.HMPREF1631_00875	1.14e-89	276.0	COG1597@1|root,COG1597@2|Bacteria,2GK3P@201174|Actinobacteria,4D4TE@85005|Actinomycetales	201174|Actinobacteria	I	Diacylglycerol kinase	-	-	2.7.1.107	ko:K07029	ko00561,ko00564,ko01100,ko01110,map00561,map00564,map01100,map01110	-	R02240	RC00002,RC00017	ko00000,ko00001,ko01000	-	-	-	DAGK_cat
TP_2849_00765	1219585.HMPREF1631_00875	9.18e-89	274.0	COG1597@1|root,COG1597@2|Bacteria,2GK3P@201174|Actinobacteria,4D4TE@85005|Actinomycetales	201174|Actinobacteria	I	Diacylglycerol kinase	-	-	2.7.1.107	ko:K07029	ko00561,ko00564,ko01100,ko01110,map00561,map00564,map01100,map01110	-	R02240	RC00002,RC00017	ko00000,ko00001,ko01000	-	-	-	DAGK_cat
UFV1_02845	1219585.HMPREF1631_00875	6.48e-89	274.0	COG1597@1|root,COG1597@2|Bacteria,2GK3P@201174|Actinobacteria,4D4TE@85005|Actinomycetales	201174|Actinobacteria	I	Diacylglycerol kinase	-	-	2.7.1.107	ko:K07029	ko00561,ko00564,ko01100,ko01110,map00561,map00564,map01100,map01110	-	R02240	RC00002,RC00017	ko00000,ko00001,ko01000	-	-	-	DAGK_cat
jx18_03065	1219585.HMPREF1631_00875	3.7e-88	272.0	COG1597@1|root,COG1597@2|Bacteria,2GK3P@201174|Actinobacteria,4D4TE@85005|Actinomycetales	201174|Actinobacteria	I	Diacylglycerol kinase	-	-	2.7.1.107	ko:K07029	ko00561,ko00564,ko01100,ko01110,map00561,map00564,map01100,map01110	-	R02240	RC00002,RC00017	ko00000,ko00001,ko01000	-	-	-	DAGK_cat
TP6375_00425	1227261.HMPREF0043_00382	2.52e-204	569.0	COG0057@1|root,COG0057@2|Bacteria,2GJK4@201174|Actinobacteria,4D318@85005|Actinomycetales	201174|Actinobacteria	G	Belongs to the glyceraldehyde-3-phosphate dehydrogenase family	gap	GO:0000166,GO:0003674,GO:0003824,GO:0004365,GO:0005488,GO:0008150,GO:0008152,GO:0016491,GO:0016620,GO:0016903,GO:0036094,GO:0043891,GO:0048037,GO:0050662,GO:0051287,GO:0055114,GO:0097159,GO:1901265,GO:1901363	1.2.1.12	ko:K00134	ko00010,ko00710,ko01100,ko01110,ko01120,ko01130,ko01200,ko01230,ko04066,ko05010,map00010,map00710,map01100,map01110,map01120,map01130,map01200,map01230,map04066,map05010	M00001,M00002,M00003,M00165,M00166,M00308,M00552	R01061	RC00149	ko00000,ko00001,ko00002,ko01000,ko04131,ko04147	-	-	-	Gp_dh_C,Gp_dh_N
2012CQ_ZSH_08100	1227261.HMPREF0043_00382	2.52e-204	569.0	COG0057@1|root,COG0057@2|Bacteria,2GJK4@201174|Actinobacteria,4D318@85005|Actinomycetales	201174|Actinobacteria	G	Belongs to the glyceraldehyde-3-phosphate dehydrogenase family	gap	GO:0000166,GO:0003674,GO:0003824,GO:0004365,GO:0005488,GO:0008150,GO:0008152,GO:0016491,GO:0016620,GO:0016903,GO:0036094,GO:0043891,GO:0048037,GO:0050662,GO:0051287,GO:0055114,GO:0097159,GO:1901265,GO:1901363	1.2.1.12	ko:K00134	ko00010,ko00710,ko01100,ko01110,ko01120,ko01130,ko01200,ko01230,ko04066,ko05010,map00010,map00710,map01100,map01110,map01120,map01130,map01200,map01230,map04066,map05010	M00001,M00002,M00003,M00165,M00166,M00308,M00552	R01061	RC00149	ko00000,ko00001,ko00002,ko01000,ko04131,ko04147	-	-	-	Gp_dh_C,Gp_dh_N
Arash114_00420	1227261.HMPREF0043_00382	2.52e-204	569.0	COG0057@1|root,COG0057@2|Bacteria,2GJK4@201174|Actinobacteria,4D318@85005|Actinomycetales	201174|Actinobacteria	G	Belongs to the glyceraldehyde-3-phosphate dehydrogenase family	gap	GO:0000166,GO:0003674,GO:0003824,GO:0004365,GO:0005488,GO:0008150,GO:0008152,GO:0016491,GO:0016620,GO:0016903,GO:0036094,GO:0043891,GO:0048037,GO:0050662,GO:0051287,GO:0055114,GO:0097159,GO:1901265,GO:1901363	1.2.1.12	ko:K00134	ko00010,ko00710,ko01100,ko01110,ko01120,ko01130,ko01200,ko01230,ko04066,ko05010,map00010,map00710,map01100,map01110,map01120,map01130,map01200,map01230,map04066,map05010	M00001,M00002,M00003,M00165,M00166,M00308,M00552	R01061	RC00149	ko00000,ko00001,ko00002,ko01000,ko04131,ko04147	-	-	-	Gp_dh_C,Gp_dh_N
Bu5_05395	1227261.HMPREF0043_00382	2.52e-204	569.0	COG0057@1|root,COG0057@2|Bacteria,2GJK4@201174|Actinobacteria,4D318@85005|Actinomycetales	201174|Actinobacteria	G	Belongs to the glyceraldehyde-3-phosphate dehydrogenase family	gap	GO:0000166,GO:0003674,GO:0003824,GO:0004365,GO:0005488,GO:0008150,GO:0008152,GO:0016491,GO:0016620,GO:0016903,GO:0036094,GO:0043891,GO:0048037,GO:0050662,GO:0051287,GO:0055114,GO:0097159,GO:1901265,GO:1901363	1.2.1.12	ko:K00134	ko00010,ko00710,ko01100,ko01110,ko01120,ko01130,ko01200,ko01230,ko04066,ko05010,map00010,map00710,map01100,map01110,map01120,map01130,map01200,map01230,map04066,map05010	M00001,M00002,M00003,M00165,M00166,M00308,M00552	R01061	RC00149	ko00000,ko00001,ko00002,ko01000,ko04131,ko04147	-	-	-	Gp_dh_C,Gp_dh_N
DSM_20630_02700	1227261.HMPREF0043_00382	2.07e-203	567.0	COG0057@1|root,COG0057@2|Bacteria,2GJK4@201174|Actinobacteria,4D318@85005|Actinomycetales	201174|Actinobacteria	G	Belongs to the glyceraldehyde-3-phosphate dehydrogenase family	gap	GO:0000166,GO:0003674,GO:0003824,GO:0004365,GO:0005488,GO:0008150,GO:0008152,GO:0016491,GO:0016620,GO:0016903,GO:0036094,GO:0043891,GO:0048037,GO:0050662,GO:0051287,GO:0055114,GO:0097159,GO:1901265,GO:1901363	1.2.1.12	ko:K00134	ko00010,ko00710,ko01100,ko01110,ko01120,ko01130,ko01200,ko01230,ko04066,ko05010,map00010,map00710,map01100,map01110,map01120,map01130,map01200,map01230,map04066,map05010	M00001,M00002,M00003,M00165,M00166,M00308,M00552	R01061	RC00149	ko00000,ko00001,ko00002,ko01000,ko04131,ko04147	-	-	-	Gp_dh_C,Gp_dh_N
MS249_05930	1227261.HMPREF0043_00382	2.52e-204	569.0	COG0057@1|root,COG0057@2|Bacteria,2GJK4@201174|Actinobacteria,4D318@85005|Actinomycetales	201174|Actinobacteria	G	Belongs to the glyceraldehyde-3-phosphate dehydrogenase family	gap	GO:0000166,GO:0003674,GO:0003824,GO:0004365,GO:0005488,GO:0008150,GO:0008152,GO:0016491,GO:0016620,GO:0016903,GO:0036094,GO:0043891,GO:0048037,GO:0050662,GO:0051287,GO:0055114,GO:0097159,GO:1901265,GO:1901363	1.2.1.12	ko:K00134	ko00010,ko00710,ko01100,ko01110,ko01120,ko01130,ko01200,ko01230,ko04066,ko05010,map00010,map00710,map01100,map01110,map01120,map01130,map01200,map01230,map04066,map05010	M00001,M00002,M00003,M00165,M00166,M00308,M00552	R01061	RC00149	ko00000,ko00001,ko00002,ko01000,ko04131,ko04147	-	-	-	Gp_dh_C,Gp_dh_N
NCTC5224_05095	1227261.HMPREF0043_00382	2.07e-203	567.0	COG0057@1|root,COG0057@2|Bacteria,2GJK4@201174|Actinobacteria,4D318@85005|Actinomycetales	201174|Actinobacteria	G	Belongs to the glyceraldehyde-3-phosphate dehydrogenase family	gap	GO:0000166,GO:0003674,GO:0003824,GO:0004365,GO:0005488,GO:0008150,GO:0008152,GO:0016491,GO:0016620,GO:0016903,GO:0036094,GO:0043891,GO:0048037,GO:0050662,GO:0051287,GO:0055114,GO:0097159,GO:1901265,GO:1901363	1.2.1.12	ko:K00134	ko00010,ko00710,ko01100,ko01110,ko01120,ko01130,ko01200,ko01230,ko04066,ko05010,map00010,map00710,map01100,map01110,map01120,map01130,map01200,map01230,map04066,map05010	M00001,M00002,M00003,M00165,M00166,M00308,M00552	R01061	RC00149	ko00000,ko00001,ko00002,ko01000,ko04131,ko04147	-	-	-	Gp_dh_C,Gp_dh_N
SH01_09350	1227261.HMPREF0043_00382	2.52e-204	569.0	COG0057@1|root,COG0057@2|Bacteria,2GJK4@201174|Actinobacteria,4D318@85005|Actinomycetales	201174|Actinobacteria	G	Belongs to the glyceraldehyde-3-phosphate dehydrogenase family	gap	GO:0000166,GO:0003674,GO:0003824,GO:0004365,GO:0005488,GO:0008150,GO:0008152,GO:0016491,GO:0016620,GO:0016903,GO:0036094,GO:0043891,GO:0048037,GO:0050662,GO:0051287,GO:0055114,GO:0097159,GO:1901265,GO:1901363	1.2.1.12	ko:K00134	ko00010,ko00710,ko01100,ko01110,ko01120,ko01130,ko01200,ko01230,ko04066,ko05010,map00010,map00710,map01100,map01110,map01120,map01130,map01200,map01230,map04066,map05010	M00001,M00002,M00003,M00165,M00166,M00308,M00552	R01061	RC00149	ko00000,ko00001,ko00002,ko01000,ko04131,ko04147	-	-	-	Gp_dh_C,Gp_dh_N
SH02_05875	1227261.HMPREF0043_00382	2.52e-204	569.0	COG0057@1|root,COG0057@2|Bacteria,2GJK4@201174|Actinobacteria,4D318@85005|Actinomycetales	201174|Actinobacteria	G	Belongs to the glyceraldehyde-3-phosphate dehydrogenase family	gap	GO:0000166,GO:0003674,GO:0003824,GO:0004365,GO:0005488,GO:0008150,GO:0008152,GO:0016491,GO:0016620,GO:0016903,GO:0036094,GO:0043891,GO:0048037,GO:0050662,GO:0051287,GO:0055114,GO:0097159,GO:1901265,GO:1901363	1.2.1.12	ko:K00134	ko00010,ko00710,ko01100,ko01110,ko01120,ko01130,ko01200,ko01230,ko04066,ko05010,map00010,map00710,map01100,map01110,map01120,map01130,map01200,map01230,map04066,map05010	M00001,M00002,M00003,M00165,M00166,M00308,M00552	R01061	RC00149	ko00000,ko00001,ko00002,ko01000,ko04131,ko04147	-	-	-	Gp_dh_C,Gp_dh_N
SH03_00405	1227261.HMPREF0043_00382	2.52e-204	569.0	COG0057@1|root,COG0057@2|Bacteria,2GJK4@201174|Actinobacteria,4D318@85005|Actinomycetales	201174|Actinobacteria	G	Belongs to the glyceraldehyde-3-phosphate dehydrogenase family	gap	GO:0000166,GO:0003674,GO:0003824,GO:0004365,GO:0005488,GO:0008150,GO:0008152,GO:0016491,GO:0016620,GO:0016903,GO:0036094,GO:0043891,GO:0048037,GO:0050662,GO:0051287,GO:0055114,GO:0097159,GO:1901265,GO:1901363	1.2.1.12	ko:K00134	ko00010,ko00710,ko01100,ko01110,ko01120,ko01130,ko01200,ko01230,ko04066,ko05010,map00010,map00710,map01100,map01110,map01120,map01130,map01200,map01230,map04066,map05010	M00001,M00002,M00003,M00165,M00166,M00308,M00552	R01061	RC00149	ko00000,ko00001,ko00002,ko01000,ko04131,ko04147	-	-	-	Gp_dh_C,Gp_dh_N
TP1_03455	1227261.HMPREF0043_00382	2.52e-204	569.0	COG0057@1|root,COG0057@2|Bacteria,2GJK4@201174|Actinobacteria,4D318@85005|Actinomycetales	201174|Actinobacteria	G	Belongs to the glyceraldehyde-3-phosphate dehydrogenase family	gap	GO:0000166,GO:0003674,GO:0003824,GO:0004365,GO:0005488,GO:0008150,GO:0008152,GO:0016491,GO:0016620,GO:0016903,GO:0036094,GO:0043891,GO:0048037,GO:0050662,GO:0051287,GO:0055114,GO:0097159,GO:1901265,GO:1901363	1.2.1.12	ko:K00134	ko00010,ko00710,ko01100,ko01110,ko01120,ko01130,ko01200,ko01230,ko04066,ko05010,map00010,map00710,map01100,map01110,map01120,map01130,map01200,map01230,map04066,map05010	M00001,M00002,M00003,M00165,M00166,M00308,M00552	R01061	RC00149	ko00000,ko00001,ko00002,ko01000,ko04131,ko04147	-	-	-	Gp_dh_C,Gp_dh_N
TP2_09450	1227261.HMPREF0043_00382	2.52e-204	569.0	COG0057@1|root,COG0057@2|Bacteria,2GJK4@201174|Actinobacteria,4D318@85005|Actinomycetales	201174|Actinobacteria	G	Belongs to the glyceraldehyde-3-phosphate dehydrogenase family	gap	GO:0000166,GO:0003674,GO:0003824,GO:0004365,GO:0005488,GO:0008150,GO:0008152,GO:0016491,GO:0016620,GO:0016903,GO:0036094,GO:0043891,GO:0048037,GO:0050662,GO:0051287,GO:0055114,GO:0097159,GO:1901265,GO:1901363	1.2.1.12	ko:K00134	ko00010,ko00710,ko01100,ko01110,ko01120,ko01130,ko01200,ko01230,ko04066,ko05010,map00010,map00710,map01100,map01110,map01120,map01130,map01200,map01230,map04066,map05010	M00001,M00002,M00003,M00165,M00166,M00308,M00552	R01061	RC00149	ko00000,ko00001,ko00002,ko01000,ko04131,ko04147	-	-	-	Gp_dh_C,Gp_dh_N
TP3_03230	1227261.HMPREF0043_00382	2.52e-204	569.0	COG0057@1|root,COG0057@2|Bacteria,2GJK4@201174|Actinobacteria,4D318@85005|Actinomycetales	201174|Actinobacteria	G	Belongs to the glyceraldehyde-3-phosphate dehydrogenase family	gap	GO:0000166,GO:0003674,GO:0003824,GO:0004365,GO:0005488,GO:0008150,GO:0008152,GO:0016491,GO:0016620,GO:0016903,GO:0036094,GO:0043891,GO:0048037,GO:0050662,GO:0051287,GO:0055114,GO:0097159,GO:1901265,GO:1901363	1.2.1.12	ko:K00134	ko00010,ko00710,ko01100,ko01110,ko01120,ko01130,ko01200,ko01230,ko04066,ko05010,map00010,map00710,map01100,map01110,map01120,map01130,map01200,map01230,map04066,map05010	M00001,M00002,M00003,M00165,M00166,M00308,M00552	R01061	RC00149	ko00000,ko00001,ko00002,ko01000,ko04131,ko04147	-	-	-	Gp_dh_C,Gp_dh_N
TP4_01420	1227261.HMPREF0043_00382	2.52e-204	569.0	COG0057@1|root,COG0057@2|Bacteria,2GJK4@201174|Actinobacteria,4D318@85005|Actinomycetales	201174|Actinobacteria	G	Belongs to the glyceraldehyde-3-phosphate dehydrogenase family	gap	GO:0000166,GO:0003674,GO:0003824,GO:0004365,GO:0005488,GO:0008150,GO:0008152,GO:0016491,GO:0016620,GO:0016903,GO:0036094,GO:0043891,GO:0048037,GO:0050662,GO:0051287,GO:0055114,GO:0097159,GO:1901265,GO:1901363	1.2.1.12	ko:K00134	ko00010,ko00710,ko01100,ko01110,ko01120,ko01130,ko01200,ko01230,ko04066,ko05010,map00010,map00710,map01100,map01110,map01120,map01130,map01200,map01230,map04066,map05010	M00001,M00002,M00003,M00165,M00166,M00308,M00552	R01061	RC00149	ko00000,ko00001,ko00002,ko01000,ko04131,ko04147	-	-	-	Gp_dh_C,Gp_dh_N
TP4479_09575	1227261.HMPREF0043_00382	2.52e-204	569.0	COG0057@1|root,COG0057@2|Bacteria,2GJK4@201174|Actinobacteria,4D318@85005|Actinomycetales	201174|Actinobacteria	G	Belongs to the glyceraldehyde-3-phosphate dehydrogenase family	gap	GO:0000166,GO:0003674,GO:0003824,GO:0004365,GO:0005488,GO:0008150,GO:0008152,GO:0016491,GO:0016620,GO:0016903,GO:0036094,GO:0043891,GO:0048037,GO:0050662,GO:0051287,GO:0055114,GO:0097159,GO:1901265,GO:1901363	1.2.1.12	ko:K00134	ko00010,ko00710,ko01100,ko01110,ko01120,ko01130,ko01200,ko01230,ko04066,ko05010,map00010,map00710,map01100,map01110,map01120,map01130,map01200,map01230,map04066,map05010	M00001,M00002,M00003,M00165,M00166,M00308,M00552	R01061	RC00149	ko00000,ko00001,ko00002,ko01000,ko04131,ko04147	-	-	-	Gp_dh_C,Gp_dh_N
TP8_05560	1227261.HMPREF0043_00382	2.52e-204	569.0	COG0057@1|root,COG0057@2|Bacteria,2GJK4@201174|Actinobacteria,4D318@85005|Actinomycetales	201174|Actinobacteria	G	Belongs to the glyceraldehyde-3-phosphate dehydrogenase family	gap	GO:0000166,GO:0003674,GO:0003824,GO:0004365,GO:0005488,GO:0008150,GO:0008152,GO:0016491,GO:0016620,GO:0016903,GO:0036094,GO:0043891,GO:0048037,GO:0050662,GO:0051287,GO:0055114,GO:0097159,GO:1901265,GO:1901363	1.2.1.12	ko:K00134	ko00010,ko00710,ko01100,ko01110,ko01120,ko01130,ko01200,ko01230,ko04066,ko05010,map00010,map00710,map01100,map01110,map01120,map01130,map01200,map01230,map04066,map05010	M00001,M00002,M00003,M00165,M00166,M00308,M00552	R01061	RC00149	ko00000,ko00001,ko00002,ko01000,ko04131,ko04147	-	-	-	Gp_dh_C,Gp_dh_N
TP_2849_00630	1227261.HMPREF0043_00382	2.52e-204	569.0	COG0057@1|root,COG0057@2|Bacteria,2GJK4@201174|Actinobacteria,4D318@85005|Actinomycetales	201174|Actinobacteria	G	Belongs to the glyceraldehyde-3-phosphate dehydrogenase family	gap	GO:0000166,GO:0003674,GO:0003824,GO:0004365,GO:0005488,GO:0008150,GO:0008152,GO:0016491,GO:0016620,GO:0016903,GO:0036094,GO:0043891,GO:0048037,GO:0050662,GO:0051287,GO:0055114,GO:0097159,GO:1901265,GO:1901363	1.2.1.12	ko:K00134	ko00010,ko00710,ko01100,ko01110,ko01120,ko01130,ko01200,ko01230,ko04066,ko05010,map00010,map00710,map01100,map01110,map01120,map01130,map01200,map01230,map04066,map05010	M00001,M00002,M00003,M00165,M00166,M00308,M00552	R01061	RC00149	ko00000,ko00001,ko00002,ko01000,ko04131,ko04147	-	-	-	Gp_dh_C,Gp_dh_N
UFV1_02715	1227261.HMPREF0043_00382	2.52e-204	569.0	COG0057@1|root,COG0057@2|Bacteria,2GJK4@201174|Actinobacteria,4D318@85005|Actinomycetales	201174|Actinobacteria	G	Belongs to the glyceraldehyde-3-phosphate dehydrogenase family	gap	GO:0000166,GO:0003674,GO:0003824,GO:0004365,GO:0005488,GO:0008150,GO:0008152,GO:0016491,GO:0016620,GO:0016903,GO:0036094,GO:0043891,GO:0048037,GO:0050662,GO:0051287,GO:0055114,GO:0097159,GO:1901265,GO:1901363	1.2.1.12	ko:K00134	ko00010,ko00710,ko01100,ko01110,ko01120,ko01130,ko01200,ko01230,ko04066,ko05010,map00010,map00710,map01100,map01110,map01120,map01130,map01200,map01230,map04066,map05010	M00001,M00002,M00003,M00165,M00166,M00308,M00552	R01061	RC00149	ko00000,ko00001,ko00002,ko01000,ko04131,ko04147	-	-	-	Gp_dh_C,Gp_dh_N
jx18_03200	1227261.HMPREF0043_00382	2.52e-204	569.0	COG0057@1|root,COG0057@2|Bacteria,2GJK4@201174|Actinobacteria,4D318@85005|Actinomycetales	201174|Actinobacteria	G	Belongs to the glyceraldehyde-3-phosphate dehydrogenase family	gap	GO:0000166,GO:0003674,GO:0003824,GO:0004365,GO:0005488,GO:0008150,GO:0008152,GO:0016491,GO:0016620,GO:0016903,GO:0036094,GO:0043891,GO:0048037,GO:0050662,GO:0051287,GO:0055114,GO:0097159,GO:1901265,GO:1901363	1.2.1.12	ko:K00134	ko00010,ko00710,ko01100,ko01110,ko01120,ko01130,ko01200,ko01230,ko04066,ko05010,map00010,map00710,map01100,map01110,map01120,map01130,map01200,map01230,map04066,map05010	M00001,M00002,M00003,M00165,M00166,M00308,M00552	R01061	RC00149	ko00000,ko00001,ko00002,ko01000,ko04131,ko04147	-	-	-	Gp_dh_C,Gp_dh_N
TP6375_10585	883067.HMPREF9237_00048	1.34e-114	345.0	COG3480@1|root,COG3480@2|Bacteria,2GJDD@201174|Actinobacteria,4D3WD@85005|Actinomycetales	201174|Actinobacteria	T	Belongs to the peptidase S16 family	ylbL	-	-	ko:K07177	ko02024,map02024	-	-	-	ko00000,ko00001,ko01002	-	-	-	Lon_C,PDZ_2
2012CQ_ZSH_00195	883067.HMPREF9237_00048	2.48e-112	339.0	COG3480@1|root,COG3480@2|Bacteria,2GJDD@201174|Actinobacteria,4D3WD@85005|Actinomycetales	201174|Actinobacteria	T	Belongs to the peptidase S16 family	ylbL	-	-	ko:K07177	ko02024,map02024	-	-	-	ko00000,ko00001,ko01002	-	-	-	Lon_C,PDZ_2
Arash114_10630	883067.HMPREF9237_00048	2.17e-113	342.0	COG3480@1|root,COG3480@2|Bacteria,2GJDD@201174|Actinobacteria,4D3WD@85005|Actinomycetales	201174|Actinobacteria	T	Belongs to the peptidase S16 family	ylbL	-	-	ko:K07177	ko02024,map02024	-	-	-	ko00000,ko00001,ko01002	-	-	-	Lon_C,PDZ_2
Bu5_08120	883067.HMPREF9237_00048	1.89e-114	345.0	COG3480@1|root,COG3480@2|Bacteria,2GJDD@201174|Actinobacteria,4D3WD@85005|Actinomycetales	201174|Actinobacteria	T	Belongs to the peptidase S16 family	ylbL	-	-	ko:K07177	ko02024,map02024	-	-	-	ko00000,ko00001,ko01002	-	-	-	Lon_C,PDZ_2
DSM_20630_04150	883067.HMPREF9237_00048	3.8e-114	344.0	COG3480@1|root,COG3480@2|Bacteria,2GJDD@201174|Actinobacteria,4D3WD@85005|Actinomycetales	201174|Actinobacteria	T	Belongs to the peptidase S16 family	ylbL	-	-	ko:K07177	ko02024,map02024	-	-	-	ko00000,ko00001,ko01002	-	-	-	Lon_C,PDZ_2
MS249_09205	883067.HMPREF9237_00048	3.8e-114	344.0	COG3480@1|root,COG3480@2|Bacteria,2GJDD@201174|Actinobacteria,4D3WD@85005|Actinomycetales	201174|Actinobacteria	T	Belongs to the peptidase S16 family	ylbL	-	-	ko:K07177	ko02024,map02024	-	-	-	ko00000,ko00001,ko01002	-	-	-	Lon_C,PDZ_2
NCTC5224_07285	883067.HMPREF9237_00048	3.8e-114	344.0	COG3480@1|root,COG3480@2|Bacteria,2GJDD@201174|Actinobacteria,4D3WD@85005|Actinomycetales	201174|Actinobacteria	T	Belongs to the peptidase S16 family	ylbL	-	-	ko:K07177	ko02024,map02024	-	-	-	ko00000,ko00001,ko01002	-	-	-	Lon_C,PDZ_2
SH01_03080	883067.HMPREF9237_00048	4.35e-113	341.0	COG3480@1|root,COG3480@2|Bacteria,2GJDD@201174|Actinobacteria,4D3WD@85005|Actinomycetales	201174|Actinobacteria	T	Belongs to the peptidase S16 family	ylbL	-	-	ko:K07177	ko02024,map02024	-	-	-	ko00000,ko00001,ko01002	-	-	-	Lon_C,PDZ_2
SH02_09685	883067.HMPREF9237_00048	3.8e-114	344.0	COG3480@1|root,COG3480@2|Bacteria,2GJDD@201174|Actinobacteria,4D3WD@85005|Actinomycetales	201174|Actinobacteria	T	Belongs to the peptidase S16 family	ylbL	-	-	ko:K07177	ko02024,map02024	-	-	-	ko00000,ko00001,ko01002	-	-	-	Lon_C,PDZ_2
SH03_05540	883067.HMPREF9237_00048	3.8e-114	344.0	COG3480@1|root,COG3480@2|Bacteria,2GJDD@201174|Actinobacteria,4D3WD@85005|Actinomycetales	201174|Actinobacteria	T	Belongs to the peptidase S16 family	ylbL	-	-	ko:K07177	ko02024,map02024	-	-	-	ko00000,ko00001,ko01002	-	-	-	Lon_C,PDZ_2
TP1_01245	883067.HMPREF9237_00048	2.48e-112	339.0	COG3480@1|root,COG3480@2|Bacteria,2GJDD@201174|Actinobacteria,4D3WD@85005|Actinomycetales	201174|Actinobacteria	T	Belongs to the peptidase S16 family	ylbL	-	-	ko:K07177	ko02024,map02024	-	-	-	ko00000,ko00001,ko01002	-	-	-	Lon_C,PDZ_2
TP2_07130	883067.HMPREF9237_00048	2.48e-112	339.0	COG3480@1|root,COG3480@2|Bacteria,2GJDD@201174|Actinobacteria,4D3WD@85005|Actinomycetales	201174|Actinobacteria	T	Belongs to the peptidase S16 family	ylbL	-	-	ko:K07177	ko02024,map02024	-	-	-	ko00000,ko00001,ko01002	-	-	-	Lon_C,PDZ_2
TP3_05455	883067.HMPREF9237_00048	6.16e-113	341.0	COG3480@1|root,COG3480@2|Bacteria,2GJDD@201174|Actinobacteria,4D3WD@85005|Actinomycetales	201174|Actinobacteria	T	Belongs to the peptidase S16 family	ylbL	-	-	ko:K07177	ko02024,map02024	-	-	-	ko00000,ko00001,ko01002	-	-	-	Lon_C,PDZ_2
TP4_10345	883067.HMPREF9237_00048	3.8e-114	344.0	COG3480@1|root,COG3480@2|Bacteria,2GJDD@201174|Actinobacteria,4D3WD@85005|Actinomycetales	201174|Actinobacteria	T	Belongs to the peptidase S16 family	ylbL	-	-	ko:K07177	ko02024,map02024	-	-	-	ko00000,ko00001,ko01002	-	-	-	Lon_C,PDZ_2
TP4479_00935	883067.HMPREF9237_00048	6.16e-113	341.0	COG3480@1|root,COG3480@2|Bacteria,2GJDD@201174|Actinobacteria,4D3WD@85005|Actinomycetales	201174|Actinobacteria	T	Belongs to the peptidase S16 family	ylbL	-	-	ko:K07177	ko02024,map02024	-	-	-	ko00000,ko00001,ko01002	-	-	-	Lon_C,PDZ_2
TP8_07780	883067.HMPREF9237_00048	3.8e-114	344.0	COG3480@1|root,COG3480@2|Bacteria,2GJDD@201174|Actinobacteria,4D3WD@85005|Actinomycetales	201174|Actinobacteria	T	Belongs to the peptidase S16 family	ylbL	-	-	ko:K07177	ko02024,map02024	-	-	-	ko00000,ko00001,ko01002	-	-	-	Lon_C,PDZ_2
TP_2849_02860	883067.HMPREF9237_00048	6.16e-113	341.0	COG3480@1|root,COG3480@2|Bacteria,2GJDD@201174|Actinobacteria,4D3WD@85005|Actinomycetales	201174|Actinobacteria	T	Belongs to the peptidase S16 family	ylbL	-	-	ko:K07177	ko02024,map02024	-	-	-	ko00000,ko00001,ko01002	-	-	-	Lon_C,PDZ_2
UFV1_05820	883067.HMPREF9237_00048	1.34e-114	345.0	COG3480@1|root,COG3480@2|Bacteria,2GJDD@201174|Actinobacteria,4D3WD@85005|Actinomycetales	201174|Actinobacteria	T	Belongs to the peptidase S16 family	ylbL	-	-	ko:K07177	ko02024,map02024	-	-	-	ko00000,ko00001,ko01002	-	-	-	Lon_C,PDZ_2
jx18_00975	883067.HMPREF9237_00048	3.8e-114	344.0	COG3480@1|root,COG3480@2|Bacteria,2GJDD@201174|Actinobacteria,4D3WD@85005|Actinomycetales	201174|Actinobacteria	T	Belongs to the peptidase S16 family	ylbL	-	-	ko:K07177	ko02024,map02024	-	-	-	ko00000,ko00001,ko01002	-	-	-	Lon_C,PDZ_2
TP6375_05825	644284.Arch_1591	1.58e-133	387.0	COG0030@1|root,COG0030@2|Bacteria,2GKBT@201174|Actinobacteria,4D3QK@85005|Actinomycetales	201174|Actinobacteria	J	Specifically dimethylates two adjacent adenosines (A1518 and A1519) in the loop of a conserved hairpin near the 3'-end of 16S rRNA in the 30S particle. May play a critical role in biogenesis of 30S subunits	ksgA	GO:0000154,GO:0000179,GO:0001510,GO:0003674,GO:0003824,GO:0005575,GO:0005622,GO:0005623,GO:0005737,GO:0006139,GO:0006364,GO:0006396,GO:0006725,GO:0006807,GO:0008150,GO:0008152,GO:0008168,GO:0008170,GO:0008173,GO:0008649,GO:0008757,GO:0009451,GO:0009987,GO:0010467,GO:0016070,GO:0016072,GO:0016433,GO:0016740,GO:0016741,GO:0022613,GO:0031167,GO:0032259,GO:0034470,GO:0034641,GO:0034660,GO:0042254,GO:…	2.1.1.182	ko:K02528	-	-	R10716	RC00003,RC03257	ko00000,ko01000,ko03009	-	-	-	RrnaAD
2012CQ_ZSH_04690	644284.Arch_1591	2.25e-133	387.0	COG0030@1|root,COG0030@2|Bacteria,2GKBT@201174|Actinobacteria,4D3QK@85005|Actinomycetales	201174|Actinobacteria	J	Specifically dimethylates two adjacent adenosines (A1518 and A1519) in the loop of a conserved hairpin near the 3'-end of 16S rRNA in the 30S particle. May play a critical role in biogenesis of 30S subunits	ksgA	GO:0000154,GO:0000179,GO:0001510,GO:0003674,GO:0003824,GO:0005575,GO:0005622,GO:0005623,GO:0005737,GO:0006139,GO:0006364,GO:0006396,GO:0006725,GO:0006807,GO:0008150,GO:0008152,GO:0008168,GO:0008170,GO:0008173,GO:0008649,GO:0008757,GO:0009451,GO:0009987,GO:0010467,GO:0016070,GO:0016072,GO:0016433,GO:0016740,GO:0016741,GO:0022613,GO:0031167,GO:0032259,GO:0034470,GO:0034641,GO:0034660,GO:0042254,GO:…	2.1.1.182	ko:K02528	-	-	R10716	RC00003,RC03257	ko00000,ko01000,ko03009	-	-	-	RrnaAD
Arash114_05830	644284.Arch_1591	2.25e-133	387.0	COG0030@1|root,COG0030@2|Bacteria,2GKBT@201174|Actinobacteria,4D3QK@85005|Actinomycetales	201174|Actinobacteria	J	Specifically dimethylates two adjacent adenosines (A1518 and A1519) in the loop of a conserved hairpin near the 3'-end of 16S rRNA in the 30S particle. May play a critical role in biogenesis of 30S subunits	ksgA	GO:0000154,GO:0000179,GO:0001510,GO:0003674,GO:0003824,GO:0005575,GO:0005622,GO:0005623,GO:0005737,GO:0006139,GO:0006364,GO:0006396,GO:0006725,GO:0006807,GO:0008150,GO:0008152,GO:0008168,GO:0008170,GO:0008173,GO:0008649,GO:0008757,GO:0009451,GO:0009987,GO:0010467,GO:0016070,GO:0016072,GO:0016433,GO:0016740,GO:0016741,GO:0022613,GO:0031167,GO:0032259,GO:0034470,GO:0034641,GO:0034660,GO:0042254,GO:…	2.1.1.182	ko:K02528	-	-	R10716	RC00003,RC03257	ko00000,ko01000,ko03009	-	-	-	RrnaAD
Bu5_00525	644284.Arch_1591	7.87e-134	388.0	COG0030@1|root,COG0030@2|Bacteria,2GKBT@201174|Actinobacteria,4D3QK@85005|Actinomycetales	201174|Actinobacteria	J	Specifically dimethylates two adjacent adenosines (A1518 and A1519) in the loop of a conserved hairpin near the 3'-end of 16S rRNA in the 30S particle. May play a critical role in biogenesis of 30S subunits	ksgA	GO:0000154,GO:0000179,GO:0001510,GO:0003674,GO:0003824,GO:0005575,GO:0005622,GO:0005623,GO:0005737,GO:0006139,GO:0006364,GO:0006396,GO:0006725,GO:0006807,GO:0008150,GO:0008152,GO:0008168,GO:0008170,GO:0008173,GO:0008649,GO:0008757,GO:0009451,GO:0009987,GO:0010467,GO:0016070,GO:0016072,GO:0016433,GO:0016740,GO:0016741,GO:0022613,GO:0031167,GO:0032259,GO:0034470,GO:0034641,GO:0034660,GO:0042254,GO:…	2.1.1.182	ko:K02528	-	-	R10716	RC00003,RC03257	ko00000,ko01000,ko03009	-	-	-	RrnaAD
DSM_20630_07655	644284.Arch_1591	1.12e-133	387.0	COG0030@1|root,COG0030@2|Bacteria,2GKBT@201174|Actinobacteria,4D3QK@85005|Actinomycetales	201174|Actinobacteria	J	Specifically dimethylates two adjacent adenosines (A1518 and A1519) in the loop of a conserved hairpin near the 3'-end of 16S rRNA in the 30S particle. May play a critical role in biogenesis of 30S subunits	ksgA	GO:0000154,GO:0000179,GO:0001510,GO:0003674,GO:0003824,GO:0005575,GO:0005622,GO:0005623,GO:0005737,GO:0006139,GO:0006364,GO:0006396,GO:0006725,GO:0006807,GO:0008150,GO:0008152,GO:0008168,GO:0008170,GO:0008173,GO:0008649,GO:0008757,GO:0009451,GO:0009987,GO:0010467,GO:0016070,GO:0016072,GO:0016433,GO:0016740,GO:0016741,GO:0022613,GO:0031167,GO:0032259,GO:0034470,GO:0034641,GO:0034660,GO:0042254,GO:…	2.1.1.182	ko:K02528	-	-	R10716	RC00003,RC03257	ko00000,ko01000,ko03009	-	-	-	RrnaAD
MS249_07305	644284.Arch_1591	1.84e-132	384.0	COG0030@1|root,COG0030@2|Bacteria,2GKBT@201174|Actinobacteria,4D3QK@85005|Actinomycetales	201174|Actinobacteria	J	Specifically dimethylates two adjacent adenosines (A1518 and A1519) in the loop of a conserved hairpin near the 3'-end of 16S rRNA in the 30S particle. May play a critical role in biogenesis of 30S subunits	ksgA	GO:0000154,GO:0000179,GO:0001510,GO:0003674,GO:0003824,GO:0005575,GO:0005622,GO:0005623,GO:0005737,GO:0006139,GO:0006364,GO:0006396,GO:0006725,GO:0006807,GO:0008150,GO:0008152,GO:0008168,GO:0008170,GO:0008173,GO:0008649,GO:0008757,GO:0009451,GO:0009987,GO:0010467,GO:0016070,GO:0016072,GO:0016433,GO:0016740,GO:0016741,GO:0022613,GO:0031167,GO:0032259,GO:0034470,GO:0034641,GO:0034660,GO:0042254,GO:…	2.1.1.182	ko:K02528	-	-	R10716	RC00003,RC03257	ko00000,ko01000,ko03009	-	-	-	RrnaAD
NCTC5224_01685	644284.Arch_1591	1.12e-133	387.0	COG0030@1|root,COG0030@2|Bacteria,2GKBT@201174|Actinobacteria,4D3QK@85005|Actinomycetales	201174|Actinobacteria	J	Specifically dimethylates two adjacent adenosines (A1518 and A1519) in the loop of a conserved hairpin near the 3'-end of 16S rRNA in the 30S particle. May play a critical role in biogenesis of 30S subunits	ksgA	GO:0000154,GO:0000179,GO:0001510,GO:0003674,GO:0003824,GO:0005575,GO:0005622,GO:0005623,GO:0005737,GO:0006139,GO:0006364,GO:0006396,GO:0006725,GO:0006807,GO:0008150,GO:0008152,GO:0008168,GO:0008170,GO:0008173,GO:0008649,GO:0008757,GO:0009451,GO:0009987,GO:0010467,GO:0016070,GO:0016072,GO:0016433,GO:0016740,GO:0016741,GO:0022613,GO:0031167,GO:0032259,GO:0034470,GO:0034641,GO:0034660,GO:0042254,GO:…	2.1.1.182	ko:K02528	-	-	R10716	RC00003,RC03257	ko00000,ko01000,ko03009	-	-	-	RrnaAD
SH01_00565	644284.Arch_1591	1.58e-133	387.0	COG0030@1|root,COG0030@2|Bacteria,2GKBT@201174|Actinobacteria,4D3QK@85005|Actinomycetales	201174|Actinobacteria	J	Specifically dimethylates two adjacent adenosines (A1518 and A1519) in the loop of a conserved hairpin near the 3'-end of 16S rRNA in the 30S particle. May play a critical role in biogenesis of 30S subunits	ksgA	GO:0000154,GO:0000179,GO:0001510,GO:0003674,GO:0003824,GO:0005575,GO:0005622,GO:0005623,GO:0005737,GO:0006139,GO:0006364,GO:0006396,GO:0006725,GO:0006807,GO:0008150,GO:0008152,GO:0008168,GO:0008170,GO:0008173,GO:0008649,GO:0008757,GO:0009451,GO:0009987,GO:0010467,GO:0016070,GO:0016072,GO:0016433,GO:0016740,GO:0016741,GO:0022613,GO:0031167,GO:0032259,GO:0034470,GO:0034641,GO:0034660,GO:0042254,GO:…	2.1.1.182	ko:K02528	-	-	R10716	RC00003,RC03257	ko00000,ko01000,ko03009	-	-	-	RrnaAD
SH02_01250	644284.Arch_1591	1.58e-133	387.0	COG0030@1|root,COG0030@2|Bacteria,2GKBT@201174|Actinobacteria,4D3QK@85005|Actinomycetales	201174|Actinobacteria	J	Specifically dimethylates two adjacent adenosines (A1518 and A1519) in the loop of a conserved hairpin near the 3'-end of 16S rRNA in the 30S particle. May play a critical role in biogenesis of 30S subunits	ksgA	GO:0000154,GO:0000179,GO:0001510,GO:0003674,GO:0003824,GO:0005575,GO:0005622,GO:0005623,GO:0005737,GO:0006139,GO:0006364,GO:0006396,GO:0006725,GO:0006807,GO:0008150,GO:0008152,GO:0008168,GO:0008170,GO:0008173,GO:0008649,GO:0008757,GO:0009451,GO:0009987,GO:0010467,GO:0016070,GO:0016072,GO:0016433,GO:0016740,GO:0016741,GO:0022613,GO:0031167,GO:0032259,GO:0034470,GO:0034641,GO:0034660,GO:0042254,GO:…	2.1.1.182	ko:K02528	-	-	R10716	RC00003,RC03257	ko00000,ko01000,ko03009	-	-	-	RrnaAD
SH03_08220	644284.Arch_1591	1.58e-133	387.0	COG0030@1|root,COG0030@2|Bacteria,2GKBT@201174|Actinobacteria,4D3QK@85005|Actinomycetales	201174|Actinobacteria	J	Specifically dimethylates two adjacent adenosines (A1518 and A1519) in the loop of a conserved hairpin near the 3'-end of 16S rRNA in the 30S particle. May play a critical role in biogenesis of 30S subunits	ksgA	GO:0000154,GO:0000179,GO:0001510,GO:0003674,GO:0003824,GO:0005575,GO:0005622,GO:0005623,GO:0005737,GO:0006139,GO:0006364,GO:0006396,GO:0006725,GO:0006807,GO:0008150,GO:0008152,GO:0008168,GO:0008170,GO:0008173,GO:0008649,GO:0008757,GO:0009451,GO:0009987,GO:0010467,GO:0016070,GO:0016072,GO:0016433,GO:0016740,GO:0016741,GO:0022613,GO:0031167,GO:0032259,GO:0034470,GO:0034641,GO:0034660,GO:0042254,GO:…	2.1.1.182	ko:K02528	-	-	R10716	RC00003,RC03257	ko00000,ko01000,ko03009	-	-	-	RrnaAD
TP1_06920	644284.Arch_1591	2.25e-133	387.0	COG0030@1|root,COG0030@2|Bacteria,2GKBT@201174|Actinobacteria,4D3QK@85005|Actinomycetales	201174|Actinobacteria	J	Specifically dimethylates two adjacent adenosines (A1518 and A1519) in the loop of a conserved hairpin near the 3'-end of 16S rRNA in the 30S particle. May play a critical role in biogenesis of 30S subunits	ksgA	GO:0000154,GO:0000179,GO:0001510,GO:0003674,GO:0003824,GO:0005575,GO:0005622,GO:0005623,GO:0005737,GO:0006139,GO:0006364,GO:0006396,GO:0006725,GO:0006807,GO:0008150,GO:0008152,GO:0008168,GO:0008170,GO:0008173,GO:0008649,GO:0008757,GO:0009451,GO:0009987,GO:0010467,GO:0016070,GO:0016072,GO:0016433,GO:0016740,GO:0016741,GO:0022613,GO:0031167,GO:0032259,GO:0034470,GO:0034641,GO:0034660,GO:0042254,GO:…	2.1.1.182	ko:K02528	-	-	R10716	RC00003,RC03257	ko00000,ko01000,ko03009	-	-	-	RrnaAD
TP2_02490	644284.Arch_1591	1.58e-133	387.0	COG0030@1|root,COG0030@2|Bacteria,2GKBT@201174|Actinobacteria,4D3QK@85005|Actinomycetales	201174|Actinobacteria	J	Specifically dimethylates two adjacent adenosines (A1518 and A1519) in the loop of a conserved hairpin near the 3'-end of 16S rRNA in the 30S particle. May play a critical role in biogenesis of 30S subunits	ksgA	GO:0000154,GO:0000179,GO:0001510,GO:0003674,GO:0003824,GO:0005575,GO:0005622,GO:0005623,GO:0005737,GO:0006139,GO:0006364,GO:0006396,GO:0006725,GO:0006807,GO:0008150,GO:0008152,GO:0008168,GO:0008170,GO:0008173,GO:0008649,GO:0008757,GO:0009451,GO:0009987,GO:0010467,GO:0016070,GO:0016072,GO:0016433,GO:0016740,GO:0016741,GO:0022613,GO:0031167,GO:0032259,GO:0034470,GO:0034641,GO:0034660,GO:0042254,GO:…	2.1.1.182	ko:K02528	-	-	R10716	RC00003,RC03257	ko00000,ko01000,ko03009	-	-	-	RrnaAD
TP3_10495	644284.Arch_1591	2.25e-133	387.0	COG0030@1|root,COG0030@2|Bacteria,2GKBT@201174|Actinobacteria,4D3QK@85005|Actinomycetales	201174|Actinobacteria	J	Specifically dimethylates two adjacent adenosines (A1518 and A1519) in the loop of a conserved hairpin near the 3'-end of 16S rRNA in the 30S particle. May play a critical role in biogenesis of 30S subunits	ksgA	GO:0000154,GO:0000179,GO:0001510,GO:0003674,GO:0003824,GO:0005575,GO:0005622,GO:0005623,GO:0005737,GO:0006139,GO:0006364,GO:0006396,GO:0006725,GO:0006807,GO:0008150,GO:0008152,GO:0008168,GO:0008170,GO:0008173,GO:0008649,GO:0008757,GO:0009451,GO:0009987,GO:0010467,GO:0016070,GO:0016072,GO:0016433,GO:0016740,GO:0016741,GO:0022613,GO:0031167,GO:0032259,GO:0034470,GO:0034641,GO:0034660,GO:0042254,GO:…	2.1.1.182	ko:K02528	-	-	R10716	RC00003,RC03257	ko00000,ko01000,ko03009	-	-	-	RrnaAD
TP4_05345	644284.Arch_1591	2.25e-133	387.0	COG0030@1|root,COG0030@2|Bacteria,2GKBT@201174|Actinobacteria,4D3QK@85005|Actinomycetales	201174|Actinobacteria	J	Specifically dimethylates two adjacent adenosines (A1518 and A1519) in the loop of a conserved hairpin near the 3'-end of 16S rRNA in the 30S particle. May play a critical role in biogenesis of 30S subunits	ksgA	GO:0000154,GO:0000179,GO:0001510,GO:0003674,GO:0003824,GO:0005575,GO:0005622,GO:0005623,GO:0005737,GO:0006139,GO:0006364,GO:0006396,GO:0006725,GO:0006807,GO:0008150,GO:0008152,GO:0008168,GO:0008170,GO:0008173,GO:0008649,GO:0008757,GO:0009451,GO:0009987,GO:0010467,GO:0016070,GO:0016072,GO:0016433,GO:0016740,GO:0016741,GO:0022613,GO:0031167,GO:0032259,GO:0034470,GO:0034641,GO:0034660,GO:0042254,GO:…	2.1.1.182	ko:K02528	-	-	R10716	RC00003,RC03257	ko00000,ko01000,ko03009	-	-	-	RrnaAD
TP4479_05975	644284.Arch_1591	2.25e-133	387.0	COG0030@1|root,COG0030@2|Bacteria,2GKBT@201174|Actinobacteria,4D3QK@85005|Actinomycetales	201174|Actinobacteria	J	Specifically dimethylates two adjacent adenosines (A1518 and A1519) in the loop of a conserved hairpin near the 3'-end of 16S rRNA in the 30S particle. May play a critical role in biogenesis of 30S subunits	ksgA	GO:0000154,GO:0000179,GO:0001510,GO:0003674,GO:0003824,GO:0005575,GO:0005622,GO:0005623,GO:0005737,GO:0006139,GO:0006364,GO:0006396,GO:0006725,GO:0006807,GO:0008150,GO:0008152,GO:0008168,GO:0008170,GO:0008173,GO:0008649,GO:0008757,GO:0009451,GO:0009987,GO:0010467,GO:0016070,GO:0016072,GO:0016433,GO:0016740,GO:0016741,GO:0022613,GO:0031167,GO:0032259,GO:0034470,GO:0034641,GO:0034660,GO:0042254,GO:…	2.1.1.182	ko:K02528	-	-	R10716	RC00003,RC03257	ko00000,ko01000,ko03009	-	-	-	RrnaAD
TP8_01885	644284.Arch_1591	2.25e-133	387.0	COG0030@1|root,COG0030@2|Bacteria,2GKBT@201174|Actinobacteria,4D3QK@85005|Actinomycetales	201174|Actinobacteria	J	Specifically dimethylates two adjacent adenosines (A1518 and A1519) in the loop of a conserved hairpin near the 3'-end of 16S rRNA in the 30S particle. May play a critical role in biogenesis of 30S subunits	ksgA	GO:0000154,GO:0000179,GO:0001510,GO:0003674,GO:0003824,GO:0005575,GO:0005622,GO:0005623,GO:0005737,GO:0006139,GO:0006364,GO:0006396,GO:0006725,GO:0006807,GO:0008150,GO:0008152,GO:0008168,GO:0008170,GO:0008173,GO:0008649,GO:0008757,GO:0009451,GO:0009987,GO:0010467,GO:0016070,GO:0016072,GO:0016433,GO:0016740,GO:0016741,GO:0022613,GO:0031167,GO:0032259,GO:0034470,GO:0034641,GO:0034660,GO:0042254,GO:…	2.1.1.182	ko:K02528	-	-	R10716	RC00003,RC03257	ko00000,ko01000,ko03009	-	-	-	RrnaAD
TP_2849_07910	644284.Arch_1591	2.25e-133	387.0	COG0030@1|root,COG0030@2|Bacteria,2GKBT@201174|Actinobacteria,4D3QK@85005|Actinomycetales	201174|Actinobacteria	J	Specifically dimethylates two adjacent adenosines (A1518 and A1519) in the loop of a conserved hairpin near the 3'-end of 16S rRNA in the 30S particle. May play a critical role in biogenesis of 30S subunits	ksgA	GO:0000154,GO:0000179,GO:0001510,GO:0003674,GO:0003824,GO:0005575,GO:0005622,GO:0005623,GO:0005737,GO:0006139,GO:0006364,GO:0006396,GO:0006725,GO:0006807,GO:0008150,GO:0008152,GO:0008168,GO:0008170,GO:0008173,GO:0008649,GO:0008757,GO:0009451,GO:0009987,GO:0010467,GO:0016070,GO:0016072,GO:0016433,GO:0016740,GO:0016741,GO:0022613,GO:0031167,GO:0032259,GO:0034470,GO:0034641,GO:0034660,GO:0042254,GO:…	2.1.1.182	ko:K02528	-	-	R10716	RC00003,RC03257	ko00000,ko01000,ko03009	-	-	-	RrnaAD
UFV1_05340	644284.Arch_1591	1.58e-133	387.0	COG0030@1|root,COG0030@2|Bacteria,2GKBT@201174|Actinobacteria,4D3QK@85005|Actinomycetales	201174|Actinobacteria	J	Specifically dimethylates two adjacent adenosines (A1518 and A1519) in the loop of a conserved hairpin near the 3'-end of 16S rRNA in the 30S particle. May play a critical role in biogenesis of 30S subunits	ksgA	GO:0000154,GO:0000179,GO:0001510,GO:0003674,GO:0003824,GO:0005575,GO:0005622,GO:0005623,GO:0005737,GO:0006139,GO:0006364,GO:0006396,GO:0006725,GO:0006807,GO:0008150,GO:0008152,GO:0008168,GO:0008170,GO:0008173,GO:0008649,GO:0008757,GO:0009451,GO:0009987,GO:0010467,GO:0016070,GO:0016072,GO:0016433,GO:0016740,GO:0016741,GO:0022613,GO:0031167,GO:0032259,GO:0034470,GO:0034641,GO:0034660,GO:0042254,GO:…	2.1.1.182	ko:K02528	-	-	R10716	RC00003,RC03257	ko00000,ko01000,ko03009	-	-	-	RrnaAD
jx18_07010	644284.Arch_1591	2.25e-133	387.0	COG0030@1|root,COG0030@2|Bacteria,2GKBT@201174|Actinobacteria,4D3QK@85005|Actinomycetales	201174|Actinobacteria	J	Specifically dimethylates two adjacent adenosines (A1518 and A1519) in the loop of a conserved hairpin near the 3'-end of 16S rRNA in the 30S particle. May play a critical role in biogenesis of 30S subunits	ksgA	GO:0000154,GO:0000179,GO:0001510,GO:0003674,GO:0003824,GO:0005575,GO:0005622,GO:0005623,GO:0005737,GO:0006139,GO:0006364,GO:0006396,GO:0006725,GO:0006807,GO:0008150,GO:0008152,GO:0008168,GO:0008170,GO:0008173,GO:0008649,GO:0008757,GO:0009451,GO:0009987,GO:0010467,GO:0016070,GO:0016072,GO:0016433,GO:0016740,GO:0016741,GO:0022613,GO:0031167,GO:0032259,GO:0034470,GO:0034641,GO:0034660,GO:0042254,GO:…	2.1.1.182	ko:K02528	-	-	R10716	RC00003,RC03257	ko00000,ko01000,ko03009	-	-	-	RrnaAD
TP6375_06065	1487956.DR71_354	2.45e-296	821.0	COG1080@1|root,COG1080@2|Bacteria,2GIZZ@201174|Actinobacteria,22KF6@1653|Corynebacteriaceae	201174|Actinobacteria	G	General (non sugar-specific) component of the phosphoenolpyruvate-dependent sugar phosphotransferase system (sugar PTS). This major carbohydrate active-transport system catalyzes the phosphorylation of incoming sugar substrates concomitantly with their translocation across the cell membrane. Enzyme I transfers the phosphoryl group from phosphoenolpyruvate (PEP) to the phosphoryl carrier protein (…	ptsP	-	2.7.3.9	ko:K08483	ko02060,map02060	-	-	-	ko00000,ko00001,ko01000,ko02000	8.A.7	-	-	PEP-utilisers_N,PEP-utilizers,PEP-utilizers_C
2012CQ_ZSH_04505	1487956.DR71_354	4.04e-295	818.0	COG1080@1|root,COG1080@2|Bacteria,2GIZZ@201174|Actinobacteria,22KF6@1653|Corynebacteriaceae	201174|Actinobacteria	G	General (non sugar-specific) component of the phosphoenolpyruvate-dependent sugar phosphotransferase system (sugar PTS). This major carbohydrate active-transport system catalyzes the phosphorylation of incoming sugar substrates concomitantly with their translocation across the cell membrane. Enzyme I transfers the phosphoryl group from phosphoenolpyruvate (PEP) to the phosphoryl carrier protein (…	ptsP	-	2.7.3.9	ko:K08483	ko02060,map02060	-	-	-	ko00000,ko00001,ko01000,ko02000	8.A.7	-	-	PEP-utilisers_N,PEP-utilizers,PEP-utilizers_C
Arash114_06085	1487956.DR71_354	4.04e-295	818.0	COG1080@1|root,COG1080@2|Bacteria,2GIZZ@201174|Actinobacteria,22KF6@1653|Corynebacteriaceae	201174|Actinobacteria	G	General (non sugar-specific) component of the phosphoenolpyruvate-dependent sugar phosphotransferase system (sugar PTS). This major carbohydrate active-transport system catalyzes the phosphorylation of incoming sugar substrates concomitantly with their translocation across the cell membrane. Enzyme I transfers the phosphoryl group from phosphoenolpyruvate (PEP) to the phosphoryl carrier protein (…	ptsP	-	2.7.3.9	ko:K08483	ko02060,map02060	-	-	-	ko00000,ko00001,ko01000,ko02000	8.A.7	-	-	PEP-utilisers_N,PEP-utilizers,PEP-utilizers_C
Bu5_00325	1487956.DR71_354	2.7e-293	813.0	COG1080@1|root,COG1080@2|Bacteria,2GIZZ@201174|Actinobacteria,22KF6@1653|Corynebacteriaceae	201174|Actinobacteria	G	General (non sugar-specific) component of the phosphoenolpyruvate-dependent sugar phosphotransferase system (sugar PTS). This major carbohydrate active-transport system catalyzes the phosphorylation of incoming sugar substrates concomitantly with their translocation across the cell membrane. Enzyme I transfers the phosphoryl group from phosphoenolpyruvate (PEP) to the phosphoryl carrier protein (…	ptsP	-	2.7.3.9	ko:K08483	ko02060,map02060	-	-	-	ko00000,ko00001,ko01000,ko02000	8.A.7	-	-	PEP-utilisers_N,PEP-utilizers,PEP-utilizers_C
DSM_20630_08810	1487956.DR71_354	1.15e-294	817.0	COG1080@1|root,COG1080@2|Bacteria,2GIZZ@201174|Actinobacteria,22KF6@1653|Corynebacteriaceae	201174|Actinobacteria	G	General (non sugar-specific) component of the phosphoenolpyruvate-dependent sugar phosphotransferase system (sugar PTS). This major carbohydrate active-transport system catalyzes the phosphorylation of incoming sugar substrates concomitantly with their translocation across the cell membrane. Enzyme I transfers the phosphoryl group from phosphoenolpyruvate (PEP) to the phosphoryl carrier protein (…	ptsP	-	2.7.3.9	ko:K08483	ko02060,map02060	-	-	-	ko00000,ko00001,ko01000,ko02000	8.A.7	-	-	PEP-utilisers_N,PEP-utilizers,PEP-utilizers_C
MS249_03680	1487956.DR71_354	4.04e-295	818.0	COG1080@1|root,COG1080@2|Bacteria,2GIZZ@201174|Actinobacteria,22KF6@1653|Corynebacteriaceae	201174|Actinobacteria	G	General (non sugar-specific) component of the phosphoenolpyruvate-dependent sugar phosphotransferase system (sugar PTS). This major carbohydrate active-transport system catalyzes the phosphorylation of incoming sugar substrates concomitantly with their translocation across the cell membrane. Enzyme I transfers the phosphoryl group from phosphoenolpyruvate (PEP) to the phosphoryl carrier protein (…	ptsP	-	2.7.3.9	ko:K08483	ko02060,map02060	-	-	-	ko00000,ko00001,ko01000,ko02000	8.A.7	-	-	PEP-utilisers_N,PEP-utilizers,PEP-utilizers_C
NCTC5224_01465	1487956.DR71_354	1.15e-294	817.0	COG1080@1|root,COG1080@2|Bacteria,2GIZZ@201174|Actinobacteria,22KF6@1653|Corynebacteriaceae	201174|Actinobacteria	G	General (non sugar-specific) component of the phosphoenolpyruvate-dependent sugar phosphotransferase system (sugar PTS). This major carbohydrate active-transport system catalyzes the phosphorylation of incoming sugar substrates concomitantly with their translocation across the cell membrane. Enzyme I transfers the phosphoryl group from phosphoenolpyruvate (PEP) to the phosphoryl carrier protein (…	ptsP	-	2.7.3.9	ko:K08483	ko02060,map02060	-	-	-	ko00000,ko00001,ko01000,ko02000	8.A.7	-	-	PEP-utilisers_N,PEP-utilizers,PEP-utilizers_C
SH01_00345	1487956.DR71_354	6.65e-294	815.0	COG1080@1|root,COG1080@2|Bacteria,2GIZZ@201174|Actinobacteria,22KF6@1653|Corynebacteriaceae	201174|Actinobacteria	G	General (non sugar-specific) component of the phosphoenolpyruvate-dependent sugar phosphotransferase system (sugar PTS). This major carbohydrate active-transport system catalyzes the phosphorylation of incoming sugar substrates concomitantly with their translocation across the cell membrane. Enzyme I transfers the phosphoryl group from phosphoenolpyruvate (PEP) to the phosphoryl carrier protein (…	ptsP	-	2.7.3.9	ko:K08483	ko02060,map02060	-	-	-	ko00000,ko00001,ko01000,ko02000	8.A.7	-	-	PEP-utilisers_N,PEP-utilizers,PEP-utilizers_C
SH02_01470	1487956.DR71_354	6.65e-294	815.0	COG1080@1|root,COG1080@2|Bacteria,2GIZZ@201174|Actinobacteria,22KF6@1653|Corynebacteriaceae	201174|Actinobacteria	G	General (non sugar-specific) component of the phosphoenolpyruvate-dependent sugar phosphotransferase system (sugar PTS). This major carbohydrate active-transport system catalyzes the phosphorylation of incoming sugar substrates concomitantly with their translocation across the cell membrane. Enzyme I transfers the phosphoryl group from phosphoenolpyruvate (PEP) to the phosphoryl carrier protein (…	ptsP	-	2.7.3.9	ko:K08483	ko02060,map02060	-	-	-	ko00000,ko00001,ko01000,ko02000	8.A.7	-	-	PEP-utilisers_N,PEP-utilizers,PEP-utilizers_C
SH03_08435	1487956.DR71_354	6.65e-294	815.0	COG1080@1|root,COG1080@2|Bacteria,2GIZZ@201174|Actinobacteria,22KF6@1653|Corynebacteriaceae	201174|Actinobacteria	G	General (non sugar-specific) component of the phosphoenolpyruvate-dependent sugar phosphotransferase system (sugar PTS). This major carbohydrate active-transport system catalyzes the phosphorylation of incoming sugar substrates concomitantly with their translocation across the cell membrane. Enzyme I transfers the phosphoryl group from phosphoenolpyruvate (PEP) to the phosphoryl carrier protein (…	ptsP	-	2.7.3.9	ko:K08483	ko02060,map02060	-	-	-	ko00000,ko00001,ko01000,ko02000	8.A.7	-	-	PEP-utilisers_N,PEP-utilizers,PEP-utilizers_C
TP1_07105	1487956.DR71_354	2.45e-296	821.0	COG1080@1|root,COG1080@2|Bacteria,2GIZZ@201174|Actinobacteria,22KF6@1653|Corynebacteriaceae	201174|Actinobacteria	G	General (non sugar-specific) component of the phosphoenolpyruvate-dependent sugar phosphotransferase system (sugar PTS). This major carbohydrate active-transport system catalyzes the phosphorylation of incoming sugar substrates concomitantly with their translocation across the cell membrane. Enzyme I transfers the phosphoryl group from phosphoenolpyruvate (PEP) to the phosphoryl carrier protein (…	ptsP	-	2.7.3.9	ko:K08483	ko02060,map02060	-	-	-	ko00000,ko00001,ko01000,ko02000	8.A.7	-	-	PEP-utilisers_N,PEP-utilizers,PEP-utilizers_C
TP2_02675	1487956.DR71_354	2.45e-296	821.0	COG1080@1|root,COG1080@2|Bacteria,2GIZZ@201174|Actinobacteria,22KF6@1653|Corynebacteriaceae	201174|Actinobacteria	G	General (non sugar-specific) component of the phosphoenolpyruvate-dependent sugar phosphotransferase system (sugar PTS). This major carbohydrate active-transport system catalyzes the phosphorylation of incoming sugar substrates concomitantly with their translocation across the cell membrane. Enzyme I transfers the phosphoryl group from phosphoenolpyruvate (PEP) to the phosphoryl carrier protein (…	ptsP	-	2.7.3.9	ko:K08483	ko02060,map02060	-	-	-	ko00000,ko00001,ko01000,ko02000	8.A.7	-	-	PEP-utilisers_N,PEP-utilizers,PEP-utilizers_C
TP3_10275	1487956.DR71_354	8.13e-295	817.0	COG1080@1|root,COG1080@2|Bacteria,2GIZZ@201174|Actinobacteria,22KF6@1653|Corynebacteriaceae	201174|Actinobacteria	G	General (non sugar-specific) component of the phosphoenolpyruvate-dependent sugar phosphotransferase system (sugar PTS). This major carbohydrate active-transport system catalyzes the phosphorylation of incoming sugar substrates concomitantly with their translocation across the cell membrane. Enzyme I transfers the phosphoryl group from phosphoenolpyruvate (PEP) to the phosphoryl carrier protein (…	ptsP	-	2.7.3.9	ko:K08483	ko02060,map02060	-	-	-	ko00000,ko00001,ko01000,ko02000	8.A.7	-	-	PEP-utilisers_N,PEP-utilizers,PEP-utilizers_C
TP4_05560	1487956.DR71_354	4.04e-295	818.0	COG1080@1|root,COG1080@2|Bacteria,2GIZZ@201174|Actinobacteria,22KF6@1653|Corynebacteriaceae	201174|Actinobacteria	G	General (non sugar-specific) component of the phosphoenolpyruvate-dependent sugar phosphotransferase system (sugar PTS). This major carbohydrate active-transport system catalyzes the phosphorylation of incoming sugar substrates concomitantly with their translocation across the cell membrane. Enzyme I transfers the phosphoryl group from phosphoenolpyruvate (PEP) to the phosphoryl carrier protein (…	ptsP	-	2.7.3.9	ko:K08483	ko02060,map02060	-	-	-	ko00000,ko00001,ko01000,ko02000	8.A.7	-	-	PEP-utilisers_N,PEP-utilizers,PEP-utilizers_C
TP4479_05755	1487956.DR71_354	8.13e-295	817.0	COG1080@1|root,COG1080@2|Bacteria,2GIZZ@201174|Actinobacteria,22KF6@1653|Corynebacteriaceae	201174|Actinobacteria	G	General (non sugar-specific) component of the phosphoenolpyruvate-dependent sugar phosphotransferase system (sugar PTS). This major carbohydrate active-transport system catalyzes the phosphorylation of incoming sugar substrates concomitantly with their translocation across the cell membrane. Enzyme I transfers the phosphoryl group from phosphoenolpyruvate (PEP) to the phosphoryl carrier protein (…	ptsP	-	2.7.3.9	ko:K08483	ko02060,map02060	-	-	-	ko00000,ko00001,ko01000,ko02000	8.A.7	-	-	PEP-utilisers_N,PEP-utilizers,PEP-utilizers_C
TP8_01670	1487956.DR71_354	8.13e-295	817.0	COG1080@1|root,COG1080@2|Bacteria,2GIZZ@201174|Actinobacteria,22KF6@1653|Corynebacteriaceae	201174|Actinobacteria	G	General (non sugar-specific) component of the phosphoenolpyruvate-dependent sugar phosphotransferase system (sugar PTS). This major carbohydrate active-transport system catalyzes the phosphorylation of incoming sugar substrates concomitantly with their translocation across the cell membrane. Enzyme I transfers the phosphoryl group from phosphoenolpyruvate (PEP) to the phosphoryl carrier protein (…	ptsP	-	2.7.3.9	ko:K08483	ko02060,map02060	-	-	-	ko00000,ko00001,ko01000,ko02000	8.A.7	-	-	PEP-utilisers_N,PEP-utilizers,PEP-utilizers_C
TP_2849_07690	1487956.DR71_354	8.13e-295	817.0	COG1080@1|root,COG1080@2|Bacteria,2GIZZ@201174|Actinobacteria,22KF6@1653|Corynebacteriaceae	201174|Actinobacteria	G	General (non sugar-specific) component of the phosphoenolpyruvate-dependent sugar phosphotransferase system (sugar PTS). This major carbohydrate active-transport system catalyzes the phosphorylation of incoming sugar substrates concomitantly with their translocation across the cell membrane. Enzyme I transfers the phosphoryl group from phosphoenolpyruvate (PEP) to the phosphoryl carrier protein (…	ptsP	-	2.7.3.9	ko:K08483	ko02060,map02060	-	-	-	ko00000,ko00001,ko01000,ko02000	8.A.7	-	-	PEP-utilisers_N,PEP-utilizers,PEP-utilizers_C
UFV1_09490	1487956.DR71_354	2.45e-296	821.0	COG1080@1|root,COG1080@2|Bacteria,2GIZZ@201174|Actinobacteria,22KF6@1653|Corynebacteriaceae	201174|Actinobacteria	G	General (non sugar-specific) component of the phosphoenolpyruvate-dependent sugar phosphotransferase system (sugar PTS). This major carbohydrate active-transport system catalyzes the phosphorylation of incoming sugar substrates concomitantly with their translocation across the cell membrane. Enzyme I transfers the phosphoryl group from phosphoenolpyruvate (PEP) to the phosphoryl carrier protein (…	ptsP	-	2.7.3.9	ko:K08483	ko02060,map02060	-	-	-	ko00000,ko00001,ko01000,ko02000	8.A.7	-	-	PEP-utilisers_N,PEP-utilizers,PEP-utilizers_C
jx18_07230	1487956.DR71_354	8.13e-295	817.0	COG1080@1|root,COG1080@2|Bacteria,2GIZZ@201174|Actinobacteria,22KF6@1653|Corynebacteriaceae	201174|Actinobacteria	G	General (non sugar-specific) component of the phosphoenolpyruvate-dependent sugar phosphotransferase system (sugar PTS). This major carbohydrate active-transport system catalyzes the phosphorylation of incoming sugar substrates concomitantly with their translocation across the cell membrane. Enzyme I transfers the phosphoryl group from phosphoenolpyruvate (PEP) to the phosphoryl carrier protein (…	ptsP	-	2.7.3.9	ko:K08483	ko02060,map02060	-	-	-	ko00000,ko00001,ko01000,ko02000	8.A.7	-	-	PEP-utilisers_N,PEP-utilizers,PEP-utilizers_C
TP6375_08960	644284.Arch_0213	9.98e-83	258.0	COG5006@1|root,COG5006@2|Bacteria,2GJKB@201174|Actinobacteria,4D3J9@85005|Actinomycetales	201174|Actinobacteria	S	membrane	-	-	-	ko:K11939	-	-	-	-	ko00000,ko02000	2.A.7.3.6	-	-	EamA
2012CQ_ZSH_01555	644284.Arch_0213	7.05e-83	259.0	COG5006@1|root,COG5006@2|Bacteria,2GJKB@201174|Actinobacteria,4D3J9@85005|Actinomycetales	201174|Actinobacteria	S	membrane	-	-	-	ko:K11939	-	-	-	-	ko00000,ko02000	2.A.7.3.6	-	-	EamA
Arash114_08990	644284.Arch_0213	9.98e-83	258.0	COG5006@1|root,COG5006@2|Bacteria,2GJKB@201174|Actinobacteria,4D3J9@85005|Actinomycetales	201174|Actinobacteria	S	membrane	-	-	-	ko:K11939	-	-	-	-	ko00000,ko02000	2.A.7.3.6	-	-	EamA
Bu5_06340	644284.Arch_0213	8.05e-82	256.0	COG5006@1|root,COG5006@2|Bacteria,2GJKB@201174|Actinobacteria,4D3J9@85005|Actinomycetales	201174|Actinobacteria	S	membrane	-	-	-	ko:K11939	-	-	-	-	ko00000,ko02000	2.A.7.3.6	-	-	EamA
DSM_20630_07125	644284.Arch_0213	4.98e-83	259.0	COG5006@1|root,COG5006@2|Bacteria,2GJKB@201174|Actinobacteria,4D3J9@85005|Actinomycetales	201174|Actinobacteria	S	membrane	-	-	-	ko:K11939	-	-	-	-	ko00000,ko02000	2.A.7.3.6	-	-	EamA
MS249_06840	644284.Arch_0213	9.98e-83	258.0	COG5006@1|root,COG5006@2|Bacteria,2GJKB@201174|Actinobacteria,4D3J9@85005|Actinomycetales	201174|Actinobacteria	S	membrane	-	-	-	ko:K11939	-	-	-	-	ko00000,ko02000	2.A.7.3.6	-	-	EamA
NCTC5224_08850	644284.Arch_0213	4.98e-83	259.0	COG5006@1|root,COG5006@2|Bacteria,2GJKB@201174|Actinobacteria,4D3J9@85005|Actinomycetales	201174|Actinobacteria	S	membrane	-	-	-	ko:K11939	-	-	-	-	ko00000,ko02000	2.A.7.3.6	-	-	EamA
SH01_03225	644284.Arch_0213	4.98e-83	259.0	COG5006@1|root,COG5006@2|Bacteria,2GJKB@201174|Actinobacteria,4D3J9@85005|Actinomycetales	201174|Actinobacteria	S	membrane	-	-	-	ko:K11939	-	-	-	-	ko00000,ko02000	2.A.7.3.6	-	-	EamA
SH02_03220	644284.Arch_0213	7.05e-83	259.0	COG5006@1|root,COG5006@2|Bacteria,2GJKB@201174|Actinobacteria,4D3J9@85005|Actinomycetales	201174|Actinobacteria	S	membrane	-	-	-	ko:K11939	-	-	-	-	ko00000,ko02000	2.A.7.3.6	-	-	EamA
SH03_06030	644284.Arch_0213	7.05e-83	259.0	COG5006@1|root,COG5006@2|Bacteria,2GJKB@201174|Actinobacteria,4D3J9@85005|Actinomycetales	201174|Actinobacteria	S	membrane	-	-	-	ko:K11939	-	-	-	-	ko00000,ko02000	2.A.7.3.6	-	-	EamA
TP1_09945	644284.Arch_0213	9.98e-83	258.0	COG5006@1|root,COG5006@2|Bacteria,2GJKB@201174|Actinobacteria,4D3J9@85005|Actinomycetales	201174|Actinobacteria	S	membrane	-	-	-	ko:K11939	-	-	-	-	ko00000,ko02000	2.A.7.3.6	-	-	EamA
TP2_05640	644284.Arch_0213	4.98e-83	259.0	COG5006@1|root,COG5006@2|Bacteria,2GJKB@201174|Actinobacteria,4D3J9@85005|Actinomycetales	201174|Actinobacteria	S	membrane	-	-	-	ko:K11939	-	-	-	-	ko00000,ko02000	2.A.7.3.6	-	-	EamA
TP3_07380	644284.Arch_0213	7.05e-83	259.0	COG5006@1|root,COG5006@2|Bacteria,2GJKB@201174|Actinobacteria,4D3J9@85005|Actinomycetales	201174|Actinobacteria	S	membrane	-	-	-	ko:K11939	-	-	-	-	ko00000,ko02000	2.A.7.3.6	-	-	EamA
TP4_08785	644284.Arch_0213	7.05e-83	259.0	COG5006@1|root,COG5006@2|Bacteria,2GJKB@201174|Actinobacteria,4D3J9@85005|Actinomycetales	201174|Actinobacteria	S	membrane	-	-	-	ko:K11939	-	-	-	-	ko00000,ko02000	2.A.7.3.6	-	-	EamA
TP4479_02855	644284.Arch_0213	7.05e-83	259.0	COG5006@1|root,COG5006@2|Bacteria,2GJKB@201174|Actinobacteria,4D3J9@85005|Actinomycetales	201174|Actinobacteria	S	membrane	-	-	-	ko:K11939	-	-	-	-	ko00000,ko02000	2.A.7.3.6	-	-	EamA
TP8_09355	644284.Arch_0213	4.98e-83	259.0	COG5006@1|root,COG5006@2|Bacteria,2GJKB@201174|Actinobacteria,4D3J9@85005|Actinomycetales	201174|Actinobacteria	S	membrane	-	-	-	ko:K11939	-	-	-	-	ko00000,ko02000	2.A.7.3.6	-	-	EamA
TP_2849_04790	644284.Arch_0213	7.05e-83	259.0	COG5006@1|root,COG5006@2|Bacteria,2GJKB@201174|Actinobacteria,4D3J9@85005|Actinomycetales	201174|Actinobacteria	S	membrane	-	-	-	ko:K11939	-	-	-	-	ko00000,ko02000	2.A.7.3.6	-	-	EamA
UFV1_10860	644284.Arch_0213	9.98e-83	258.0	COG5006@1|root,COG5006@2|Bacteria,2GJKB@201174|Actinobacteria,4D3J9@85005|Actinomycetales	201174|Actinobacteria	S	membrane	-	-	-	ko:K11939	-	-	-	-	ko00000,ko02000	2.A.7.3.6	-	-	EamA
jx18_10615	644284.Arch_0213	4.98e-83	259.0	COG5006@1|root,COG5006@2|Bacteria,2GJKB@201174|Actinobacteria,4D3J9@85005|Actinomycetales	201174|Actinobacteria	S	membrane	-	-	-	ko:K11939	-	-	-	-	ko00000,ko02000	2.A.7.3.6	-	-	EamA
TP6375_09155	644284.Arch_1487	0.0	903.0	COG3119@1|root,COG3119@2|Bacteria,2GJ8H@201174|Actinobacteria,4D47I@85005|Actinomycetales	201174|Actinobacteria	P	Arylsulfatase	-	-	-	-	-	-	-	-	-	-	-	-	Sulfatase
2012CQ_ZSH_01350	644284.Arch_1487	0.0	903.0	COG3119@1|root,COG3119@2|Bacteria,2GJ8H@201174|Actinobacteria,4D47I@85005|Actinomycetales	201174|Actinobacteria	P	Arylsulfatase	-	-	-	-	-	-	-	-	-	-	-	-	Sulfatase
Arash114_09185	644284.Arch_1487	0.0	903.0	COG3119@1|root,COG3119@2|Bacteria,2GJ8H@201174|Actinobacteria,4D47I@85005|Actinomycetales	201174|Actinobacteria	P	Arylsulfatase	-	-	-	-	-	-	-	-	-	-	-	-	Sulfatase
Bu5_06140	644284.Arch_1487	0.0	900.0	COG3119@1|root,COG3119@2|Bacteria,2GJ8H@201174|Actinobacteria,4D47I@85005|Actinomycetales	201174|Actinobacteria	P	Arylsulfatase	-	-	-	-	-	-	-	-	-	-	-	-	Sulfatase
DSM_20630_05110	644284.Arch_1487	0.0	900.0	COG3119@1|root,COG3119@2|Bacteria,2GJ8H@201174|Actinobacteria,4D47I@85005|Actinomycetales	201174|Actinobacteria	P	Arylsulfatase	-	-	-	-	-	-	-	-	-	-	-	-	Sulfatase
MS249_00130	644284.Arch_1487	0.0	903.0	COG3119@1|root,COG3119@2|Bacteria,2GJ8H@201174|Actinobacteria,4D47I@85005|Actinomycetales	201174|Actinobacteria	P	Arylsulfatase	-	-	-	-	-	-	-	-	-	-	-	-	Sulfatase
NCTC5224_08655	644284.Arch_1487	0.0	900.0	COG3119@1|root,COG3119@2|Bacteria,2GJ8H@201174|Actinobacteria,4D47I@85005|Actinomycetales	201174|Actinobacteria	P	Arylsulfatase	-	-	-	-	-	-	-	-	-	-	-	-	Sulfatase
SH01_10090	644284.Arch_1487	0.0	903.0	COG3119@1|root,COG3119@2|Bacteria,2GJ8H@201174|Actinobacteria,4D47I@85005|Actinomycetales	201174|Actinobacteria	P	Arylsulfatase	-	-	-	-	-	-	-	-	-	-	-	-	Sulfatase
SH02_03415	644284.Arch_1487	0.0	903.0	COG3119@1|root,COG3119@2|Bacteria,2GJ8H@201174|Actinobacteria,4D47I@85005|Actinomycetales	201174|Actinobacteria	P	Arylsulfatase	-	-	-	-	-	-	-	-	-	-	-	-	Sulfatase
SH03_08950	644284.Arch_1487	0.0	903.0	COG3119@1|root,COG3119@2|Bacteria,2GJ8H@201174|Actinobacteria,4D47I@85005|Actinomycetales	201174|Actinobacteria	P	Arylsulfatase	-	-	-	-	-	-	-	-	-	-	-	-	Sulfatase
TP1_10140	644284.Arch_1487	0.0	903.0	COG3119@1|root,COG3119@2|Bacteria,2GJ8H@201174|Actinobacteria,4D47I@85005|Actinomycetales	201174|Actinobacteria	P	Arylsulfatase	-	-	-	-	-	-	-	-	-	-	-	-	Sulfatase
TP2_05845	644284.Arch_1487	0.0	903.0	COG3119@1|root,COG3119@2|Bacteria,2GJ8H@201174|Actinobacteria,4D47I@85005|Actinomycetales	201174|Actinobacteria	P	Arylsulfatase	-	-	-	-	-	-	-	-	-	-	-	-	Sulfatase
TP3_06875	644284.Arch_1487	0.0	903.0	COG3119@1|root,COG3119@2|Bacteria,2GJ8H@201174|Actinobacteria,4D47I@85005|Actinomycetales	201174|Actinobacteria	P	Arylsulfatase	-	-	-	-	-	-	-	-	-	-	-	-	Sulfatase
TP4_08980	644284.Arch_1487	0.0	903.0	COG3119@1|root,COG3119@2|Bacteria,2GJ8H@201174|Actinobacteria,4D47I@85005|Actinomycetales	201174|Actinobacteria	P	Arylsulfatase	-	-	-	-	-	-	-	-	-	-	-	-	Sulfatase
TP4479_02350	644284.Arch_1487	0.0	903.0	COG3119@1|root,COG3119@2|Bacteria,2GJ8H@201174|Actinobacteria,4D47I@85005|Actinomycetales	201174|Actinobacteria	P	Arylsulfatase	-	-	-	-	-	-	-	-	-	-	-	-	Sulfatase
TP8_09150	644284.Arch_1487	0.0	903.0	COG3119@1|root,COG3119@2|Bacteria,2GJ8H@201174|Actinobacteria,4D47I@85005|Actinomycetales	201174|Actinobacteria	P	Arylsulfatase	-	-	-	-	-	-	-	-	-	-	-	-	Sulfatase
TP_2849_04285	644284.Arch_1487	0.0	903.0	COG3119@1|root,COG3119@2|Bacteria,2GJ8H@201174|Actinobacteria,4D47I@85005|Actinomycetales	201174|Actinobacteria	P	Arylsulfatase	-	-	-	-	-	-	-	-	-	-	-	-	Sulfatase
UFV1_10730	644284.Arch_1487	0.0	903.0	COG3119@1|root,COG3119@2|Bacteria,2GJ8H@201174|Actinobacteria,4D47I@85005|Actinomycetales	201174|Actinobacteria	P	Arylsulfatase	-	-	-	-	-	-	-	-	-	-	-	-	Sulfatase
jx18_10810	644284.Arch_1487	0.0	903.0	COG3119@1|root,COG3119@2|Bacteria,2GJ8H@201174|Actinobacteria,4D47I@85005|Actinomycetales	201174|Actinobacteria	P	Arylsulfatase	-	-	-	-	-	-	-	-	-	-	-	-	Sulfatase
TP6375_01515	644284.Arch_0696	7.86e-193	547.0	COG0232@1|root,COG0232@2|Bacteria,2GJ8F@201174|Actinobacteria,4D330@85005|Actinomycetales	201174|Actinobacteria	F	Deoxyguanosinetriphosphate triphosphohydrolase-like protein	dgt	GO:0003674,GO:0003824,GO:0005575,GO:0005623,GO:0005886,GO:0006139,GO:0006163,GO:0006195,GO:0006203,GO:0006725,GO:0006753,GO:0006793,GO:0006796,GO:0006807,GO:0008150,GO:0008152,GO:0008832,GO:0009056,GO:0009058,GO:0009117,GO:0009141,GO:0009143,GO:0009144,GO:0009146,GO:0009151,GO:0009155,GO:0009166,GO:0009200,GO:0009204,GO:0009215,GO:0009217,GO:0009262,GO:0009264,GO:0009394,GO:0009987,GO:0016020,GO:…	3.1.5.1	ko:K01129	ko00230,map00230	-	R01856	RC00017	ko00000,ko00001,ko01000	-	-	-	HD,HD_assoc
2012CQ_ZSH_09100	644284.Arch_0696	7.86e-193	547.0	COG0232@1|root,COG0232@2|Bacteria,2GJ8F@201174|Actinobacteria,4D330@85005|Actinomycetales	201174|Actinobacteria	F	Deoxyguanosinetriphosphate triphosphohydrolase-like protein	dgt	GO:0003674,GO:0003824,GO:0005575,GO:0005623,GO:0005886,GO:0006139,GO:0006163,GO:0006195,GO:0006203,GO:0006725,GO:0006753,GO:0006793,GO:0006796,GO:0006807,GO:0008150,GO:0008152,GO:0008832,GO:0009056,GO:0009058,GO:0009117,GO:0009141,GO:0009143,GO:0009144,GO:0009146,GO:0009151,GO:0009155,GO:0009166,GO:0009200,GO:0009204,GO:0009215,GO:0009217,GO:0009262,GO:0009264,GO:0009394,GO:0009987,GO:0016020,GO:…	3.1.5.1	ko:K01129	ko00230,map00230	-	R01856	RC00017	ko00000,ko00001,ko01000	-	-	-	HD,HD_assoc
Arash114_01510	644284.Arch_0696	7.86e-193	547.0	COG0232@1|root,COG0232@2|Bacteria,2GJ8F@201174|Actinobacteria,4D330@85005|Actinomycetales	201174|Actinobacteria	F	Deoxyguanosinetriphosphate triphosphohydrolase-like protein	dgt	GO:0003674,GO:0003824,GO:0005575,GO:0005623,GO:0005886,GO:0006139,GO:0006163,GO:0006195,GO:0006203,GO:0006725,GO:0006753,GO:0006793,GO:0006796,GO:0006807,GO:0008150,GO:0008152,GO:0008832,GO:0009056,GO:0009058,GO:0009117,GO:0009141,GO:0009143,GO:0009144,GO:0009146,GO:0009151,GO:0009155,GO:0009166,GO:0009200,GO:0009204,GO:0009215,GO:0009217,GO:0009262,GO:0009264,GO:0009394,GO:0009987,GO:0016020,GO:…	3.1.5.1	ko:K01129	ko00230,map00230	-	R01856	RC00017	ko00000,ko00001,ko01000	-	-	-	HD,HD_assoc
Bu5_04440	644284.Arch_0696	2.25e-192	546.0	COG0232@1|root,COG0232@2|Bacteria,2GJ8F@201174|Actinobacteria,4D330@85005|Actinomycetales	201174|Actinobacteria	F	Deoxyguanosinetriphosphate triphosphohydrolase-like protein	dgt	GO:0003674,GO:0003824,GO:0005575,GO:0005623,GO:0005886,GO:0006139,GO:0006163,GO:0006195,GO:0006203,GO:0006725,GO:0006753,GO:0006793,GO:0006796,GO:0006807,GO:0008150,GO:0008152,GO:0008832,GO:0009056,GO:0009058,GO:0009117,GO:0009141,GO:0009143,GO:0009144,GO:0009146,GO:0009151,GO:0009155,GO:0009166,GO:0009200,GO:0009204,GO:0009215,GO:0009217,GO:0009262,GO:0009264,GO:0009394,GO:0009987,GO:0016020,GO:…	3.1.5.1	ko:K01129	ko00230,map00230	-	R01856	RC00017	ko00000,ko00001,ko01000	-	-	-	HD,HD_assoc
DSM_20630_03665	644284.Arch_0696	7.86e-193	547.0	COG0232@1|root,COG0232@2|Bacteria,2GJ8F@201174|Actinobacteria,4D330@85005|Actinomycetales	201174|Actinobacteria	F	Deoxyguanosinetriphosphate triphosphohydrolase-like protein	dgt	GO:0003674,GO:0003824,GO:0005575,GO:0005623,GO:0005886,GO:0006139,GO:0006163,GO:0006195,GO:0006203,GO:0006725,GO:0006753,GO:0006793,GO:0006796,GO:0006807,GO:0008150,GO:0008152,GO:0008832,GO:0009056,GO:0009058,GO:0009117,GO:0009141,GO:0009143,GO:0009144,GO:0009146,GO:0009151,GO:0009155,GO:0009166,GO:0009200,GO:0009204,GO:0009215,GO:0009217,GO:0009262,GO:0009264,GO:0009394,GO:0009987,GO:0016020,GO:…	3.1.5.1	ko:K01129	ko00230,map00230	-	R01856	RC00017	ko00000,ko00001,ko01000	-	-	-	HD,HD_assoc
MS249_01175	644284.Arch_0696	7.86e-193	547.0	COG0232@1|root,COG0232@2|Bacteria,2GJ8F@201174|Actinobacteria,4D330@85005|Actinomycetales	201174|Actinobacteria	F	Deoxyguanosinetriphosphate triphosphohydrolase-like protein	dgt	GO:0003674,GO:0003824,GO:0005575,GO:0005623,GO:0005886,GO:0006139,GO:0006163,GO:0006195,GO:0006203,GO:0006725,GO:0006753,GO:0006793,GO:0006796,GO:0006807,GO:0008150,GO:0008152,GO:0008832,GO:0009056,GO:0009058,GO:0009117,GO:0009141,GO:0009143,GO:0009144,GO:0009146,GO:0009151,GO:0009155,GO:0009166,GO:0009200,GO:0009204,GO:0009215,GO:0009217,GO:0009262,GO:0009264,GO:0009394,GO:0009987,GO:0016020,GO:…	3.1.5.1	ko:K01129	ko00230,map00230	-	R01856	RC00017	ko00000,ko00001,ko01000	-	-	-	HD,HD_assoc
NCTC5224_06060	644284.Arch_0696	7.86e-193	547.0	COG0232@1|root,COG0232@2|Bacteria,2GJ8F@201174|Actinobacteria,4D330@85005|Actinomycetales	201174|Actinobacteria	F	Deoxyguanosinetriphosphate triphosphohydrolase-like protein	dgt	GO:0003674,GO:0003824,GO:0005575,GO:0005623,GO:0005886,GO:0006139,GO:0006163,GO:0006195,GO:0006203,GO:0006725,GO:0006753,GO:0006793,GO:0006796,GO:0006807,GO:0008150,GO:0008152,GO:0008832,GO:0009056,GO:0009058,GO:0009117,GO:0009141,GO:0009143,GO:0009144,GO:0009146,GO:0009151,GO:0009155,GO:0009166,GO:0009200,GO:0009204,GO:0009215,GO:0009217,GO:0009262,GO:0009264,GO:0009394,GO:0009987,GO:0016020,GO:…	3.1.5.1	ko:K01129	ko00230,map00230	-	R01856	RC00017	ko00000,ko00001,ko01000	-	-	-	HD,HD_assoc
SH01_07925	644284.Arch_0696	7.86e-193	547.0	COG0232@1|root,COG0232@2|Bacteria,2GJ8F@201174|Actinobacteria,4D330@85005|Actinomycetales	201174|Actinobacteria	F	Deoxyguanosinetriphosphate triphosphohydrolase-like protein	dgt	GO:0003674,GO:0003824,GO:0005575,GO:0005623,GO:0005886,GO:0006139,GO:0006163,GO:0006195,GO:0006203,GO:0006725,GO:0006753,GO:0006793,GO:0006796,GO:0006807,GO:0008150,GO:0008152,GO:0008832,GO:0009056,GO:0009058,GO:0009117,GO:0009141,GO:0009143,GO:0009144,GO:0009146,GO:0009151,GO:0009155,GO:0009166,GO:0009200,GO:0009204,GO:0009215,GO:0009217,GO:0009262,GO:0009264,GO:0009394,GO:0009987,GO:0016020,GO:…	3.1.5.1	ko:K01129	ko00230,map00230	-	R01856	RC00017	ko00000,ko00001,ko01000	-	-	-	HD,HD_assoc
SH02_04465	644284.Arch_0696	7.86e-193	547.0	COG0232@1|root,COG0232@2|Bacteria,2GJ8F@201174|Actinobacteria,4D330@85005|Actinomycetales	201174|Actinobacteria	F	Deoxyguanosinetriphosphate triphosphohydrolase-like protein	dgt	GO:0003674,GO:0003824,GO:0005575,GO:0005623,GO:0005886,GO:0006139,GO:0006163,GO:0006195,GO:0006203,GO:0006725,GO:0006753,GO:0006793,GO:0006796,GO:0006807,GO:0008150,GO:0008152,GO:0008832,GO:0009056,GO:0009058,GO:0009117,GO:0009141,GO:0009143,GO:0009144,GO:0009146,GO:0009151,GO:0009155,GO:0009166,GO:0009200,GO:0009204,GO:0009215,GO:0009217,GO:0009262,GO:0009264,GO:0009394,GO:0009987,GO:0016020,GO:…	3.1.5.1	ko:K01129	ko00230,map00230	-	R01856	RC00017	ko00000,ko00001,ko01000	-	-	-	HD,HD_assoc
SH03_01380	644284.Arch_0696	7.86e-193	547.0	COG0232@1|root,COG0232@2|Bacteria,2GJ8F@201174|Actinobacteria,4D330@85005|Actinomycetales	201174|Actinobacteria	F	Deoxyguanosinetriphosphate triphosphohydrolase-like protein	dgt	GO:0003674,GO:0003824,GO:0005575,GO:0005623,GO:0005886,GO:0006139,GO:0006163,GO:0006195,GO:0006203,GO:0006725,GO:0006753,GO:0006793,GO:0006796,GO:0006807,GO:0008150,GO:0008152,GO:0008832,GO:0009056,GO:0009058,GO:0009117,GO:0009141,GO:0009143,GO:0009144,GO:0009146,GO:0009151,GO:0009155,GO:0009166,GO:0009200,GO:0009204,GO:0009215,GO:0009217,GO:0009262,GO:0009264,GO:0009394,GO:0009987,GO:0016020,GO:…	3.1.5.1	ko:K01129	ko00230,map00230	-	R01856	RC00017	ko00000,ko00001,ko01000	-	-	-	HD,HD_assoc
TP1_02500	644284.Arch_0696	5.54e-193	547.0	COG0232@1|root,COG0232@2|Bacteria,2GJ8F@201174|Actinobacteria,4D330@85005|Actinomycetales	201174|Actinobacteria	F	Deoxyguanosinetriphosphate triphosphohydrolase-like protein	dgt	GO:0003674,GO:0003824,GO:0005575,GO:0005623,GO:0005886,GO:0006139,GO:0006163,GO:0006195,GO:0006203,GO:0006725,GO:0006753,GO:0006793,GO:0006796,GO:0006807,GO:0008150,GO:0008152,GO:0008832,GO:0009056,GO:0009058,GO:0009117,GO:0009141,GO:0009143,GO:0009144,GO:0009146,GO:0009151,GO:0009155,GO:0009166,GO:0009200,GO:0009204,GO:0009215,GO:0009217,GO:0009262,GO:0009264,GO:0009394,GO:0009987,GO:0016020,GO:…	3.1.5.1	ko:K01129	ko00230,map00230	-	R01856	RC00017	ko00000,ko00001,ko01000	-	-	-	HD,HD_assoc
TP2_08365	644284.Arch_0696	7.86e-193	547.0	COG0232@1|root,COG0232@2|Bacteria,2GJ8F@201174|Actinobacteria,4D330@85005|Actinomycetales	201174|Actinobacteria	F	Deoxyguanosinetriphosphate triphosphohydrolase-like protein	dgt	GO:0003674,GO:0003824,GO:0005575,GO:0005623,GO:0005886,GO:0006139,GO:0006163,GO:0006195,GO:0006203,GO:0006725,GO:0006753,GO:0006793,GO:0006796,GO:0006807,GO:0008150,GO:0008152,GO:0008832,GO:0009056,GO:0009058,GO:0009117,GO:0009141,GO:0009143,GO:0009144,GO:0009146,GO:0009151,GO:0009155,GO:0009166,GO:0009200,GO:0009204,GO:0009215,GO:0009217,GO:0009262,GO:0009264,GO:0009394,GO:0009987,GO:0016020,GO:…	3.1.5.1	ko:K01129	ko00230,map00230	-	R01856	RC00017	ko00000,ko00001,ko01000	-	-	-	HD,HD_assoc
TP3_04205	644284.Arch_0696	7.86e-193	547.0	COG0232@1|root,COG0232@2|Bacteria,2GJ8F@201174|Actinobacteria,4D330@85005|Actinomycetales	201174|Actinobacteria	F	Deoxyguanosinetriphosphate triphosphohydrolase-like protein	dgt	GO:0003674,GO:0003824,GO:0005575,GO:0005623,GO:0005886,GO:0006139,GO:0006163,GO:0006195,GO:0006203,GO:0006725,GO:0006753,GO:0006793,GO:0006796,GO:0006807,GO:0008150,GO:0008152,GO:0008832,GO:0009056,GO:0009058,GO:0009117,GO:0009141,GO:0009143,GO:0009144,GO:0009146,GO:0009151,GO:0009155,GO:0009166,GO:0009200,GO:0009204,GO:0009215,GO:0009217,GO:0009262,GO:0009264,GO:0009394,GO:0009987,GO:0016020,GO:…	3.1.5.1	ko:K01129	ko00230,map00230	-	R01856	RC00017	ko00000,ko00001,ko01000	-	-	-	HD,HD_assoc
TP4_00440	644284.Arch_0696	7.86e-193	547.0	COG0232@1|root,COG0232@2|Bacteria,2GJ8F@201174|Actinobacteria,4D330@85005|Actinomycetales	201174|Actinobacteria	F	Deoxyguanosinetriphosphate triphosphohydrolase-like protein	dgt	GO:0003674,GO:0003824,GO:0005575,GO:0005623,GO:0005886,GO:0006139,GO:0006163,GO:0006195,GO:0006203,GO:0006725,GO:0006753,GO:0006793,GO:0006796,GO:0006807,GO:0008150,GO:0008152,GO:0008832,GO:0009056,GO:0009058,GO:0009117,GO:0009141,GO:0009143,GO:0009144,GO:0009146,GO:0009151,GO:0009155,GO:0009166,GO:0009200,GO:0009204,GO:0009215,GO:0009217,GO:0009262,GO:0009264,GO:0009394,GO:0009987,GO:0016020,GO:…	3.1.5.1	ko:K01129	ko00230,map00230	-	R01856	RC00017	ko00000,ko00001,ko01000	-	-	-	HD,HD_assoc
TP4479_10550	644284.Arch_0696	7.86e-193	547.0	COG0232@1|root,COG0232@2|Bacteria,2GJ8F@201174|Actinobacteria,4D330@85005|Actinomycetales	201174|Actinobacteria	F	Deoxyguanosinetriphosphate triphosphohydrolase-like protein	dgt	GO:0003674,GO:0003824,GO:0005575,GO:0005623,GO:0005886,GO:0006139,GO:0006163,GO:0006195,GO:0006203,GO:0006725,GO:0006753,GO:0006793,GO:0006796,GO:0006807,GO:0008150,GO:0008152,GO:0008832,GO:0009056,GO:0009058,GO:0009117,GO:0009141,GO:0009143,GO:0009144,GO:0009146,GO:0009151,GO:0009155,GO:0009166,GO:0009200,GO:0009204,GO:0009215,GO:0009217,GO:0009262,GO:0009264,GO:0009394,GO:0009987,GO:0016020,GO:…	3.1.5.1	ko:K01129	ko00230,map00230	-	R01856	RC00017	ko00000,ko00001,ko01000	-	-	-	HD,HD_assoc
TP8_06585	644284.Arch_0696	7.86e-193	547.0	COG0232@1|root,COG0232@2|Bacteria,2GJ8F@201174|Actinobacteria,4D330@85005|Actinomycetales	201174|Actinobacteria	F	Deoxyguanosinetriphosphate triphosphohydrolase-like protein	dgt	GO:0003674,GO:0003824,GO:0005575,GO:0005623,GO:0005886,GO:0006139,GO:0006163,GO:0006195,GO:0006203,GO:0006725,GO:0006753,GO:0006793,GO:0006796,GO:0006807,GO:0008150,GO:0008152,GO:0008832,GO:0009056,GO:0009058,GO:0009117,GO:0009141,GO:0009143,GO:0009144,GO:0009146,GO:0009151,GO:0009155,GO:0009166,GO:0009200,GO:0009204,GO:0009215,GO:0009217,GO:0009262,GO:0009264,GO:0009394,GO:0009987,GO:0016020,GO:…	3.1.5.1	ko:K01129	ko00230,map00230	-	R01856	RC00017	ko00000,ko00001,ko01000	-	-	-	HD,HD_assoc
TP_2849_01605	644284.Arch_0696	7.86e-193	547.0	COG0232@1|root,COG0232@2|Bacteria,2GJ8F@201174|Actinobacteria,4D330@85005|Actinomycetales	201174|Actinobacteria	F	Deoxyguanosinetriphosphate triphosphohydrolase-like protein	dgt	GO:0003674,GO:0003824,GO:0005575,GO:0005623,GO:0005886,GO:0006139,GO:0006163,GO:0006195,GO:0006203,GO:0006725,GO:0006753,GO:0006793,GO:0006796,GO:0006807,GO:0008150,GO:0008152,GO:0008832,GO:0009056,GO:0009058,GO:0009117,GO:0009141,GO:0009143,GO:0009144,GO:0009146,GO:0009151,GO:0009155,GO:0009166,GO:0009200,GO:0009204,GO:0009215,GO:0009217,GO:0009262,GO:0009264,GO:0009394,GO:0009987,GO:0016020,GO:…	3.1.5.1	ko:K01129	ko00230,map00230	-	R01856	RC00017	ko00000,ko00001,ko01000	-	-	-	HD,HD_assoc
UFV1_04765	644284.Arch_0696	7.86e-193	547.0	COG0232@1|root,COG0232@2|Bacteria,2GJ8F@201174|Actinobacteria,4D330@85005|Actinomycetales	201174|Actinobacteria	F	Deoxyguanosinetriphosphate triphosphohydrolase-like protein	dgt	GO:0003674,GO:0003824,GO:0005575,GO:0005623,GO:0005886,GO:0006139,GO:0006163,GO:0006195,GO:0006203,GO:0006725,GO:0006753,GO:0006793,GO:0006796,GO:0006807,GO:0008150,GO:0008152,GO:0008832,GO:0009056,GO:0009058,GO:0009117,GO:0009141,GO:0009143,GO:0009144,GO:0009146,GO:0009151,GO:0009155,GO:0009166,GO:0009200,GO:0009204,GO:0009215,GO:0009217,GO:0009262,GO:0009264,GO:0009394,GO:0009987,GO:0016020,GO:…	3.1.5.1	ko:K01129	ko00230,map00230	-	R01856	RC00017	ko00000,ko00001,ko01000	-	-	-	HD,HD_assoc
jx18_02225	644284.Arch_0696	7.86e-193	547.0	COG0232@1|root,COG0232@2|Bacteria,2GJ8F@201174|Actinobacteria,4D330@85005|Actinomycetales	201174|Actinobacteria	F	Deoxyguanosinetriphosphate triphosphohydrolase-like protein	dgt	GO:0003674,GO:0003824,GO:0005575,GO:0005623,GO:0005886,GO:0006139,GO:0006163,GO:0006195,GO:0006203,GO:0006725,GO:0006753,GO:0006793,GO:0006796,GO:0006807,GO:0008150,GO:0008152,GO:0008832,GO:0009056,GO:0009058,GO:0009117,GO:0009141,GO:0009143,GO:0009144,GO:0009146,GO:0009151,GO:0009155,GO:0009166,GO:0009200,GO:0009204,GO:0009215,GO:0009217,GO:0009262,GO:0009264,GO:0009394,GO:0009987,GO:0016020,GO:…	3.1.5.1	ko:K01129	ko00230,map00230	-	R01856	RC00017	ko00000,ko00001,ko01000	-	-	-	HD,HD_assoc
TP6375_04490	644284.Arch_1329	1.79e-204	572.0	COG0533@1|root,COG0533@2|Bacteria,2GJ98@201174|Actinobacteria,4D4C7@85005|Actinomycetales	201174|Actinobacteria	O	Required for the formation of a threonylcarbamoyl group on adenosine at position 37 (t(6)A37) in tRNAs that read codons beginning with adenine. Is involved in the transfer of the threonylcarbamoyl moiety of threonylcarbamoyl-AMP (TC-AMP) to the N6 group of A37, together with TsaE and TsaB. TsaD likely plays a direct catalytic role in this reaction	tsaD	GO:0000408,GO:0002949,GO:0005575,GO:0005622,GO:0005623,GO:0006139,GO:0006396,GO:0006399,GO:0006400,GO:0006725,GO:0006807,GO:0008033,GO:0008150,GO:0008152,GO:0009451,GO:0009987,GO:0010467,GO:0016070,GO:0032991,GO:0034470,GO:0034641,GO:0034660,GO:0043170,GO:0043412,GO:0044237,GO:0044238,GO:0044424,GO:0044464,GO:0046483,GO:0070525,GO:0071704,GO:0090304,GO:1901360	2.3.1.234	ko:K01409	-	-	R10648	RC00070,RC00416	ko00000,ko01000,ko03016	-	-	-	Acetyltransf_1,Peptidase_M22
2012CQ_ZSH_06035	644284.Arch_1329	1.79e-204	572.0	COG0533@1|root,COG0533@2|Bacteria,2GJ98@201174|Actinobacteria,4D4C7@85005|Actinomycetales	201174|Actinobacteria	O	Required for the formation of a threonylcarbamoyl group on adenosine at position 37 (t(6)A37) in tRNAs that read codons beginning with adenine. Is involved in the transfer of the threonylcarbamoyl moiety of threonylcarbamoyl-AMP (TC-AMP) to the N6 group of A37, together with TsaE and TsaB. TsaD likely plays a direct catalytic role in this reaction	tsaD	GO:0000408,GO:0002949,GO:0005575,GO:0005622,GO:0005623,GO:0006139,GO:0006396,GO:0006399,GO:0006400,GO:0006725,GO:0006807,GO:0008033,GO:0008150,GO:0008152,GO:0009451,GO:0009987,GO:0010467,GO:0016070,GO:0032991,GO:0034470,GO:0034641,GO:0034660,GO:0043170,GO:0043412,GO:0044237,GO:0044238,GO:0044424,GO:0044464,GO:0046483,GO:0070525,GO:0071704,GO:0090304,GO:1901360	2.3.1.234	ko:K01409	-	-	R10648	RC00070,RC00416	ko00000,ko01000,ko03016	-	-	-	Acetyltransf_1,Peptidase_M22
Arash114_04490	644284.Arch_1329	4.2e-203	568.0	COG0533@1|root,COG0533@2|Bacteria,2GJ98@201174|Actinobacteria,4D4C7@85005|Actinomycetales	201174|Actinobacteria	O	Required for the formation of a threonylcarbamoyl group on adenosine at position 37 (t(6)A37) in tRNAs that read codons beginning with adenine. Is involved in the transfer of the threonylcarbamoyl moiety of threonylcarbamoyl-AMP (TC-AMP) to the N6 group of A37, together with TsaE and TsaB. TsaD likely plays a direct catalytic role in this reaction	tsaD	GO:0000408,GO:0002949,GO:0005575,GO:0005622,GO:0005623,GO:0006139,GO:0006396,GO:0006399,GO:0006400,GO:0006725,GO:0006807,GO:0008033,GO:0008150,GO:0008152,GO:0009451,GO:0009987,GO:0010467,GO:0016070,GO:0032991,GO:0034470,GO:0034641,GO:0034660,GO:0043170,GO:0043412,GO:0044237,GO:0044238,GO:0044424,GO:0044464,GO:0046483,GO:0070525,GO:0071704,GO:0090304,GO:1901360	2.3.1.234	ko:K01409	-	-	R10648	RC00070,RC00416	ko00000,ko01000,ko03016	-	-	-	Acetyltransf_1,Peptidase_M22
Bu5_01900	644284.Arch_1329	1.79e-204	572.0	COG0533@1|root,COG0533@2|Bacteria,2GJ98@201174|Actinobacteria,4D4C7@85005|Actinomycetales	201174|Actinobacteria	O	Required for the formation of a threonylcarbamoyl group on adenosine at position 37 (t(6)A37) in tRNAs that read codons beginning with adenine. Is involved in the transfer of the threonylcarbamoyl moiety of threonylcarbamoyl-AMP (TC-AMP) to the N6 group of A37, together with TsaE and TsaB. TsaD likely plays a direct catalytic role in this reaction	tsaD	GO:0000408,GO:0002949,GO:0005575,GO:0005622,GO:0005623,GO:0006139,GO:0006396,GO:0006399,GO:0006400,GO:0006725,GO:0006807,GO:0008033,GO:0008150,GO:0008152,GO:0009451,GO:0009987,GO:0010467,GO:0016070,GO:0032991,GO:0034470,GO:0034641,GO:0034660,GO:0043170,GO:0043412,GO:0044237,GO:0044238,GO:0044424,GO:0044464,GO:0046483,GO:0070525,GO:0071704,GO:0090304,GO:1901360	2.3.1.234	ko:K01409	-	-	R10648	RC00070,RC00416	ko00000,ko01000,ko03016	-	-	-	Acetyltransf_1,Peptidase_M22
DSM_20630_00630	644284.Arch_1329	1.47e-203	569.0	COG0533@1|root,COG0533@2|Bacteria,2GJ98@201174|Actinobacteria,4D4C7@85005|Actinomycetales	201174|Actinobacteria	O	Required for the formation of a threonylcarbamoyl group on adenosine at position 37 (t(6)A37) in tRNAs that read codons beginning with adenine. Is involved in the transfer of the threonylcarbamoyl moiety of threonylcarbamoyl-AMP (TC-AMP) to the N6 group of A37, together with TsaE and TsaB. TsaD likely plays a direct catalytic role in this reaction	tsaD	GO:0000408,GO:0002949,GO:0005575,GO:0005622,GO:0005623,GO:0006139,GO:0006396,GO:0006399,GO:0006400,GO:0006725,GO:0006807,GO:0008033,GO:0008150,GO:0008152,GO:0009451,GO:0009987,GO:0010467,GO:0016070,GO:0032991,GO:0034470,GO:0034641,GO:0034660,GO:0043170,GO:0043412,GO:0044237,GO:0044238,GO:0044424,GO:0044464,GO:0046483,GO:0070525,GO:0071704,GO:0090304,GO:1901360	2.3.1.234	ko:K01409	-	-	R10648	RC00070,RC00416	ko00000,ko01000,ko03016	-	-	-	Acetyltransf_1,Peptidase_M22
MS249_02260	644284.Arch_1329	4.2e-203	568.0	COG0533@1|root,COG0533@2|Bacteria,2GJ98@201174|Actinobacteria,4D4C7@85005|Actinomycetales	201174|Actinobacteria	O	Required for the formation of a threonylcarbamoyl group on adenosine at position 37 (t(6)A37) in tRNAs that read codons beginning with adenine. Is involved in the transfer of the threonylcarbamoyl moiety of threonylcarbamoyl-AMP (TC-AMP) to the N6 group of A37, together with TsaE and TsaB. TsaD likely plays a direct catalytic role in this reaction	tsaD	GO:0000408,GO:0002949,GO:0005575,GO:0005622,GO:0005623,GO:0006139,GO:0006396,GO:0006399,GO:0006400,GO:0006725,GO:0006807,GO:0008033,GO:0008150,GO:0008152,GO:0009451,GO:0009987,GO:0010467,GO:0016070,GO:0032991,GO:0034470,GO:0034641,GO:0034660,GO:0043170,GO:0043412,GO:0044237,GO:0044238,GO:0044424,GO:0044464,GO:0046483,GO:0070525,GO:0071704,GO:0090304,GO:1901360	2.3.1.234	ko:K01409	-	-	R10648	RC00070,RC00416	ko00000,ko01000,ko03016	-	-	-	Acetyltransf_1,Peptidase_M22
NCTC5224_03030	644284.Arch_1329	1.47e-203	569.0	COG0533@1|root,COG0533@2|Bacteria,2GJ98@201174|Actinobacteria,4D4C7@85005|Actinomycetales	201174|Actinobacteria	O	Required for the formation of a threonylcarbamoyl group on adenosine at position 37 (t(6)A37) in tRNAs that read codons beginning with adenine. Is involved in the transfer of the threonylcarbamoyl moiety of threonylcarbamoyl-AMP (TC-AMP) to the N6 group of A37, together with TsaE and TsaB. TsaD likely plays a direct catalytic role in this reaction	tsaD	GO:0000408,GO:0002949,GO:0005575,GO:0005622,GO:0005623,GO:0006139,GO:0006396,GO:0006399,GO:0006400,GO:0006725,GO:0006807,GO:0008033,GO:0008150,GO:0008152,GO:0009451,GO:0009987,GO:0010467,GO:0016070,GO:0032991,GO:0034470,GO:0034641,GO:0034660,GO:0043170,GO:0043412,GO:0044237,GO:0044238,GO:0044424,GO:0044464,GO:0046483,GO:0070525,GO:0071704,GO:0090304,GO:1901360	2.3.1.234	ko:K01409	-	-	R10648	RC00070,RC00416	ko00000,ko01000,ko03016	-	-	-	Acetyltransf_1,Peptidase_M22
SH01_01875	644284.Arch_1329	1.79e-204	572.0	COG0533@1|root,COG0533@2|Bacteria,2GJ98@201174|Actinobacteria,4D4C7@85005|Actinomycetales	201174|Actinobacteria	O	Required for the formation of a threonylcarbamoyl group on adenosine at position 37 (t(6)A37) in tRNAs that read codons beginning with adenine. Is involved in the transfer of the threonylcarbamoyl moiety of threonylcarbamoyl-AMP (TC-AMP) to the N6 group of A37, together with TsaE and TsaB. TsaD likely plays a direct catalytic role in this reaction	tsaD	GO:0000408,GO:0002949,GO:0005575,GO:0005622,GO:0005623,GO:0006139,GO:0006396,GO:0006399,GO:0006400,GO:0006725,GO:0006807,GO:0008033,GO:0008150,GO:0008152,GO:0009451,GO:0009987,GO:0010467,GO:0016070,GO:0032991,GO:0034470,GO:0034641,GO:0034660,GO:0043170,GO:0043412,GO:0044237,GO:0044238,GO:0044424,GO:0044464,GO:0046483,GO:0070525,GO:0071704,GO:0090304,GO:1901360	2.3.1.234	ko:K01409	-	-	R10648	RC00070,RC00416	ko00000,ko01000,ko03016	-	-	-	Acetyltransf_1,Peptidase_M22
SH02_08580	644284.Arch_1329	1.79e-204	572.0	COG0533@1|root,COG0533@2|Bacteria,2GJ98@201174|Actinobacteria,4D4C7@85005|Actinomycetales	201174|Actinobacteria	O	Required for the formation of a threonylcarbamoyl group on adenosine at position 37 (t(6)A37) in tRNAs that read codons beginning with adenine. Is involved in the transfer of the threonylcarbamoyl moiety of threonylcarbamoyl-AMP (TC-AMP) to the N6 group of A37, together with TsaE and TsaB. TsaD likely plays a direct catalytic role in this reaction	tsaD	GO:0000408,GO:0002949,GO:0005575,GO:0005622,GO:0005623,GO:0006139,GO:0006396,GO:0006399,GO:0006400,GO:0006725,GO:0006807,GO:0008033,GO:0008150,GO:0008152,GO:0009451,GO:0009987,GO:0010467,GO:0016070,GO:0032991,GO:0034470,GO:0034641,GO:0034660,GO:0043170,GO:0043412,GO:0044237,GO:0044238,GO:0044424,GO:0044464,GO:0046483,GO:0070525,GO:0071704,GO:0090304,GO:1901360	2.3.1.234	ko:K01409	-	-	R10648	RC00070,RC00416	ko00000,ko01000,ko03016	-	-	-	Acetyltransf_1,Peptidase_M22
SH03_06900	644284.Arch_1329	1.79e-204	572.0	COG0533@1|root,COG0533@2|Bacteria,2GJ98@201174|Actinobacteria,4D4C7@85005|Actinomycetales	201174|Actinobacteria	O	Required for the formation of a threonylcarbamoyl group on adenosine at position 37 (t(6)A37) in tRNAs that read codons beginning with adenine. Is involved in the transfer of the threonylcarbamoyl moiety of threonylcarbamoyl-AMP (TC-AMP) to the N6 group of A37, together with TsaE and TsaB. TsaD likely plays a direct catalytic role in this reaction	tsaD	GO:0000408,GO:0002949,GO:0005575,GO:0005622,GO:0005623,GO:0006139,GO:0006396,GO:0006399,GO:0006400,GO:0006725,GO:0006807,GO:0008033,GO:0008150,GO:0008152,GO:0009451,GO:0009987,GO:0010467,GO:0016070,GO:0032991,GO:0034470,GO:0034641,GO:0034660,GO:0043170,GO:0043412,GO:0044237,GO:0044238,GO:0044424,GO:0044464,GO:0046483,GO:0070525,GO:0071704,GO:0090304,GO:1901360	2.3.1.234	ko:K01409	-	-	R10648	RC00070,RC00416	ko00000,ko01000,ko03016	-	-	-	Acetyltransf_1,Peptidase_M22
TP1_05540	644284.Arch_1329	1.47e-203	569.0	COG0533@1|root,COG0533@2|Bacteria,2GJ98@201174|Actinobacteria,4D4C7@85005|Actinomycetales	201174|Actinobacteria	O	Required for the formation of a threonylcarbamoyl group on adenosine at position 37 (t(6)A37) in tRNAs that read codons beginning with adenine. Is involved in the transfer of the threonylcarbamoyl moiety of threonylcarbamoyl-AMP (TC-AMP) to the N6 group of A37, together with TsaE and TsaB. TsaD likely plays a direct catalytic role in this reaction	tsaD	GO:0000408,GO:0002949,GO:0005575,GO:0005622,GO:0005623,GO:0006139,GO:0006396,GO:0006399,GO:0006400,GO:0006725,GO:0006807,GO:0008033,GO:0008150,GO:0008152,GO:0009451,GO:0009987,GO:0010467,GO:0016070,GO:0032991,GO:0034470,GO:0034641,GO:0034660,GO:0043170,GO:0043412,GO:0044237,GO:0044238,GO:0044424,GO:0044464,GO:0046483,GO:0070525,GO:0071704,GO:0090304,GO:1901360	2.3.1.234	ko:K01409	-	-	R10648	RC00070,RC00416	ko00000,ko01000,ko03016	-	-	-	Acetyltransf_1,Peptidase_M22
TP2_01120	644284.Arch_1329	1.47e-203	569.0	COG0533@1|root,COG0533@2|Bacteria,2GJ98@201174|Actinobacteria,4D4C7@85005|Actinomycetales	201174|Actinobacteria	O	Required for the formation of a threonylcarbamoyl group on adenosine at position 37 (t(6)A37) in tRNAs that read codons beginning with adenine. Is involved in the transfer of the threonylcarbamoyl moiety of threonylcarbamoyl-AMP (TC-AMP) to the N6 group of A37, together with TsaE and TsaB. TsaD likely plays a direct catalytic role in this reaction	tsaD	GO:0000408,GO:0002949,GO:0005575,GO:0005622,GO:0005623,GO:0006139,GO:0006396,GO:0006399,GO:0006400,GO:0006725,GO:0006807,GO:0008033,GO:0008150,GO:0008152,GO:0009451,GO:0009987,GO:0010467,GO:0016070,GO:0032991,GO:0034470,GO:0034641,GO:0034660,GO:0043170,GO:0043412,GO:0044237,GO:0044238,GO:0044424,GO:0044464,GO:0046483,GO:0070525,GO:0071704,GO:0090304,GO:1901360	2.3.1.234	ko:K01409	-	-	R10648	RC00070,RC00416	ko00000,ko01000,ko03016	-	-	-	Acetyltransf_1,Peptidase_M22
TP3_00965	644284.Arch_1329	1.79e-204	572.0	COG0533@1|root,COG0533@2|Bacteria,2GJ98@201174|Actinobacteria,4D4C7@85005|Actinomycetales	201174|Actinobacteria	O	Required for the formation of a threonylcarbamoyl group on adenosine at position 37 (t(6)A37) in tRNAs that read codons beginning with adenine. Is involved in the transfer of the threonylcarbamoyl moiety of threonylcarbamoyl-AMP (TC-AMP) to the N6 group of A37, together with TsaE and TsaB. TsaD likely plays a direct catalytic role in this reaction	tsaD	GO:0000408,GO:0002949,GO:0005575,GO:0005622,GO:0005623,GO:0006139,GO:0006396,GO:0006399,GO:0006400,GO:0006725,GO:0006807,GO:0008033,GO:0008150,GO:0008152,GO:0009451,GO:0009987,GO:0010467,GO:0016070,GO:0032991,GO:0034470,GO:0034641,GO:0034660,GO:0043170,GO:0043412,GO:0044237,GO:0044238,GO:0044424,GO:0044464,GO:0046483,GO:0070525,GO:0071704,GO:0090304,GO:1901360	2.3.1.234	ko:K01409	-	-	R10648	RC00070,RC00416	ko00000,ko01000,ko03016	-	-	-	Acetyltransf_1,Peptidase_M22
TP4_04030	644284.Arch_1329	1.79e-204	572.0	COG0533@1|root,COG0533@2|Bacteria,2GJ98@201174|Actinobacteria,4D4C7@85005|Actinomycetales	201174|Actinobacteria	O	Required for the formation of a threonylcarbamoyl group on adenosine at position 37 (t(6)A37) in tRNAs that read codons beginning with adenine. Is involved in the transfer of the threonylcarbamoyl moiety of threonylcarbamoyl-AMP (TC-AMP) to the N6 group of A37, together with TsaE and TsaB. TsaD likely plays a direct catalytic role in this reaction	tsaD	GO:0000408,GO:0002949,GO:0005575,GO:0005622,GO:0005623,GO:0006139,GO:0006396,GO:0006399,GO:0006400,GO:0006725,GO:0006807,GO:0008033,GO:0008150,GO:0008152,GO:0009451,GO:0009987,GO:0010467,GO:0016070,GO:0032991,GO:0034470,GO:0034641,GO:0034660,GO:0043170,GO:0043412,GO:0044237,GO:0044238,GO:0044424,GO:0044464,GO:0046483,GO:0070525,GO:0071704,GO:0090304,GO:1901360	2.3.1.234	ko:K01409	-	-	R10648	RC00070,RC00416	ko00000,ko01000,ko03016	-	-	-	Acetyltransf_1,Peptidase_M22
TP4479_07315	644284.Arch_1329	1.79e-204	572.0	COG0533@1|root,COG0533@2|Bacteria,2GJ98@201174|Actinobacteria,4D4C7@85005|Actinomycetales	201174|Actinobacteria	O	Required for the formation of a threonylcarbamoyl group on adenosine at position 37 (t(6)A37) in tRNAs that read codons beginning with adenine. Is involved in the transfer of the threonylcarbamoyl moiety of threonylcarbamoyl-AMP (TC-AMP) to the N6 group of A37, together with TsaE and TsaB. TsaD likely plays a direct catalytic role in this reaction	tsaD	GO:0000408,GO:0002949,GO:0005575,GO:0005622,GO:0005623,GO:0006139,GO:0006396,GO:0006399,GO:0006400,GO:0006725,GO:0006807,GO:0008033,GO:0008150,GO:0008152,GO:0009451,GO:0009987,GO:0010467,GO:0016070,GO:0032991,GO:0034470,GO:0034641,GO:0034660,GO:0043170,GO:0043412,GO:0044237,GO:0044238,GO:0044424,GO:0044464,GO:0046483,GO:0070525,GO:0071704,GO:0090304,GO:1901360	2.3.1.234	ko:K01409	-	-	R10648	RC00070,RC00416	ko00000,ko01000,ko03016	-	-	-	Acetyltransf_1,Peptidase_M22
TP8_03285	644284.Arch_1329	1.47e-203	569.0	COG0533@1|root,COG0533@2|Bacteria,2GJ98@201174|Actinobacteria,4D4C7@85005|Actinomycetales	201174|Actinobacteria	O	Required for the formation of a threonylcarbamoyl group on adenosine at position 37 (t(6)A37) in tRNAs that read codons beginning with adenine. Is involved in the transfer of the threonylcarbamoyl moiety of threonylcarbamoyl-AMP (TC-AMP) to the N6 group of A37, together with TsaE and TsaB. TsaD likely plays a direct catalytic role in this reaction	tsaD	GO:0000408,GO:0002949,GO:0005575,GO:0005622,GO:0005623,GO:0006139,GO:0006396,GO:0006399,GO:0006400,GO:0006725,GO:0006807,GO:0008033,GO:0008150,GO:0008152,GO:0009451,GO:0009987,GO:0010467,GO:0016070,GO:0032991,GO:0034470,GO:0034641,GO:0034660,GO:0043170,GO:0043412,GO:0044237,GO:0044238,GO:0044424,GO:0044464,GO:0046483,GO:0070525,GO:0071704,GO:0090304,GO:1901360	2.3.1.234	ko:K01409	-	-	R10648	RC00070,RC00416	ko00000,ko01000,ko03016	-	-	-	Acetyltransf_1,Peptidase_M22
TP_2849_09250	644284.Arch_1329	1.79e-204	572.0	COG0533@1|root,COG0533@2|Bacteria,2GJ98@201174|Actinobacteria,4D4C7@85005|Actinomycetales	201174|Actinobacteria	O	Required for the formation of a threonylcarbamoyl group on adenosine at position 37 (t(6)A37) in tRNAs that read codons beginning with adenine. Is involved in the transfer of the threonylcarbamoyl moiety of threonylcarbamoyl-AMP (TC-AMP) to the N6 group of A37, together with TsaE and TsaB. TsaD likely plays a direct catalytic role in this reaction	tsaD	GO:0000408,GO:0002949,GO:0005575,GO:0005622,GO:0005623,GO:0006139,GO:0006396,GO:0006399,GO:0006400,GO:0006725,GO:0006807,GO:0008033,GO:0008150,GO:0008152,GO:0009451,GO:0009987,GO:0010467,GO:0016070,GO:0032991,GO:0034470,GO:0034641,GO:0034660,GO:0043170,GO:0043412,GO:0044237,GO:0044238,GO:0044424,GO:0044464,GO:0046483,GO:0070525,GO:0071704,GO:0090304,GO:1901360	2.3.1.234	ko:K01409	-	-	R10648	RC00070,RC00416	ko00000,ko01000,ko03016	-	-	-	Acetyltransf_1,Peptidase_M22
UFV1_01575	644284.Arch_1329	1.79e-204	572.0	COG0533@1|root,COG0533@2|Bacteria,2GJ98@201174|Actinobacteria,4D4C7@85005|Actinomycetales	201174|Actinobacteria	O	Required for the formation of a threonylcarbamoyl group on adenosine at position 37 (t(6)A37) in tRNAs that read codons beginning with adenine. Is involved in the transfer of the threonylcarbamoyl moiety of threonylcarbamoyl-AMP (TC-AMP) to the N6 group of A37, together with TsaE and TsaB. TsaD likely plays a direct catalytic role in this reaction	tsaD	GO:0000408,GO:0002949,GO:0005575,GO:0005622,GO:0005623,GO:0006139,GO:0006396,GO:0006399,GO:0006400,GO:0006725,GO:0006807,GO:0008033,GO:0008150,GO:0008152,GO:0009451,GO:0009987,GO:0010467,GO:0016070,GO:0032991,GO:0034470,GO:0034641,GO:0034660,GO:0043170,GO:0043412,GO:0044237,GO:0044238,GO:0044424,GO:0044464,GO:0046483,GO:0070525,GO:0071704,GO:0090304,GO:1901360	2.3.1.234	ko:K01409	-	-	R10648	RC00070,RC00416	ko00000,ko01000,ko03016	-	-	-	Acetyltransf_1,Peptidase_M22
jx18_05695	644284.Arch_1329	1.26e-204	572.0	COG0533@1|root,COG0533@2|Bacteria,2GJ98@201174|Actinobacteria,4D4C7@85005|Actinomycetales	201174|Actinobacteria	O	Required for the formation of a threonylcarbamoyl group on adenosine at position 37 (t(6)A37) in tRNAs that read codons beginning with adenine. Is involved in the transfer of the threonylcarbamoyl moiety of threonylcarbamoyl-AMP (TC-AMP) to the N6 group of A37, together with TsaE and TsaB. TsaD likely plays a direct catalytic role in this reaction	tsaD	GO:0000408,GO:0002949,GO:0005575,GO:0005622,GO:0005623,GO:0006139,GO:0006396,GO:0006399,GO:0006400,GO:0006725,GO:0006807,GO:0008033,GO:0008150,GO:0008152,GO:0009451,GO:0009987,GO:0010467,GO:0016070,GO:0032991,GO:0034470,GO:0034641,GO:0034660,GO:0043170,GO:0043412,GO:0044237,GO:0044238,GO:0044424,GO:0044464,GO:0046483,GO:0070525,GO:0071704,GO:0090304,GO:1901360	2.3.1.234	ko:K01409	-	-	R10648	RC00070,RC00416	ko00000,ko01000,ko03016	-	-	-	Acetyltransf_1,Peptidase_M22
TP6375_08775	644284.Arch_0178	2.69e-134	391.0	COG0008@1|root,COG0008@2|Bacteria,2GKMT@201174|Actinobacteria,4D361@85005|Actinomycetales	201174|Actinobacteria	J	Belongs to the class-I aminoacyl-tRNA synthetase family	gluQ	-	6.1.1.17	ko:K01885	ko00860,ko00970,ko01100,ko01110,ko01120,map00860,map00970,map01100,map01110,map01120	M00121,M00359,M00360	R05578	RC00055,RC00523	ko00000,ko00001,ko00002,ko01000,ko01007,ko02048,ko03016	-	-	-	tRNA-synt_1c
2012CQ_ZSH_01735	644284.Arch_0178	2.32e-135	394.0	COG0008@1|root,COG0008@2|Bacteria,2GKMT@201174|Actinobacteria,4D361@85005|Actinomycetales	201174|Actinobacteria	J	Belongs to the class-I aminoacyl-tRNA synthetase family	gluQ	-	6.1.1.17	ko:K01885	ko00860,ko00970,ko01100,ko01110,ko01120,map00860,map00970,map01100,map01110,map01120	M00121,M00359,M00360	R05578	RC00055,RC00523	ko00000,ko00001,ko00002,ko01000,ko01007,ko02048,ko03016	-	-	-	tRNA-synt_1c
Arash114_08810	644284.Arch_0178	4.68e-135	393.0	COG0008@1|root,COG0008@2|Bacteria,2GKMT@201174|Actinobacteria,4D361@85005|Actinomycetales	201174|Actinobacteria	J	Belongs to the class-I aminoacyl-tRNA synthetase family	gluQ	-	6.1.1.17	ko:K01885	ko00860,ko00970,ko01100,ko01110,ko01120,map00860,map00970,map01100,map01110,map01120	M00121,M00359,M00360	R05578	RC00055,RC00523	ko00000,ko00001,ko00002,ko01000,ko01007,ko02048,ko03016	-	-	-	tRNA-synt_1c
Bu5_06525	644284.Arch_0178	2.69e-134	391.0	COG0008@1|root,COG0008@2|Bacteria,2GKMT@201174|Actinobacteria,4D361@85005|Actinomycetales	201174|Actinobacteria	J	Belongs to the class-I aminoacyl-tRNA synthetase family	gluQ	-	6.1.1.17	ko:K01885	ko00860,ko00970,ko01100,ko01110,ko01120,map00860,map00970,map01100,map01110,map01120	M00121,M00359,M00360	R05578	RC00055,RC00523	ko00000,ko00001,ko00002,ko01000,ko01007,ko02048,ko03016	-	-	-	tRNA-synt_1c
DSM_20630_08115	644284.Arch_0178	2.32e-135	394.0	COG0008@1|root,COG0008@2|Bacteria,2GKMT@201174|Actinobacteria,4D361@85005|Actinomycetales	201174|Actinobacteria	J	Belongs to the class-I aminoacyl-tRNA synthetase family	gluQ	-	6.1.1.17	ko:K01885	ko00860,ko00970,ko01100,ko01110,ko01120,map00860,map00970,map01100,map01110,map01120	M00121,M00359,M00360	R05578	RC00055,RC00523	ko00000,ko00001,ko00002,ko01000,ko01007,ko02048,ko03016	-	-	-	tRNA-synt_1c
MS249_04955	644284.Arch_0178	5.41e-134	390.0	COG0008@1|root,COG0008@2|Bacteria,2GKMT@201174|Actinobacteria,4D361@85005|Actinomycetales	201174|Actinobacteria	J	Belongs to the class-I aminoacyl-tRNA synthetase family	gluQ	-	6.1.1.17	ko:K01885	ko00860,ko00970,ko01100,ko01110,ko01120,map00860,map00970,map01100,map01110,map01120	M00121,M00359,M00360	R05578	RC00055,RC00523	ko00000,ko00001,ko00002,ko01000,ko01007,ko02048,ko03016	-	-	-	tRNA-synt_1c
NCTC5224_09030	644284.Arch_0178	2.32e-135	394.0	COG0008@1|root,COG0008@2|Bacteria,2GKMT@201174|Actinobacteria,4D361@85005|Actinomycetales	201174|Actinobacteria	J	Belongs to the class-I aminoacyl-tRNA synthetase family	gluQ	-	6.1.1.17	ko:K01885	ko00860,ko00970,ko01100,ko01110,ko01120,map00860,map00970,map01100,map01110,map01120	M00121,M00359,M00360	R05578	RC00055,RC00523	ko00000,ko00001,ko00002,ko01000,ko01007,ko02048,ko03016	-	-	-	tRNA-synt_1c
SH01_05100	644284.Arch_0178	3.3e-135	394.0	COG0008@1|root,COG0008@2|Bacteria,2GKMT@201174|Actinobacteria,4D361@85005|Actinomycetales	201174|Actinobacteria	J	Belongs to the class-I aminoacyl-tRNA synthetase family	gluQ	-	6.1.1.17	ko:K01885	ko00860,ko00970,ko01100,ko01110,ko01120,map00860,map00970,map01100,map01110,map01120	M00121,M00359,M00360	R05578	RC00055,RC00523	ko00000,ko00001,ko00002,ko01000,ko01007,ko02048,ko03016	-	-	-	tRNA-synt_1c
SH02_09320	644284.Arch_0178	2.32e-135	394.0	COG0008@1|root,COG0008@2|Bacteria,2GKMT@201174|Actinobacteria,4D361@85005|Actinomycetales	201174|Actinobacteria	J	Belongs to the class-I aminoacyl-tRNA synthetase family	gluQ	-	6.1.1.17	ko:K01885	ko00860,ko00970,ko01100,ko01110,ko01120,map00860,map00970,map01100,map01110,map01120	M00121,M00359,M00360	R05578	RC00055,RC00523	ko00000,ko00001,ko00002,ko01000,ko01007,ko02048,ko03016	-	-	-	tRNA-synt_1c
SH03_05180	644284.Arch_0178	2.32e-135	394.0	COG0008@1|root,COG0008@2|Bacteria,2GKMT@201174|Actinobacteria,4D361@85005|Actinomycetales	201174|Actinobacteria	J	Belongs to the class-I aminoacyl-tRNA synthetase family	gluQ	-	6.1.1.17	ko:K01885	ko00860,ko00970,ko01100,ko01110,ko01120,map00860,map00970,map01100,map01110,map01120	M00121,M00359,M00360	R05578	RC00055,RC00523	ko00000,ko00001,ko00002,ko01000,ko01007,ko02048,ko03016	-	-	-	tRNA-synt_1c
TP1_09760	644284.Arch_0178	2.69e-134	391.0	COG0008@1|root,COG0008@2|Bacteria,2GKMT@201174|Actinobacteria,4D361@85005|Actinomycetales	201174|Actinobacteria	J	Belongs to the class-I aminoacyl-tRNA synthetase family	gluQ	-	6.1.1.17	ko:K01885	ko00860,ko00970,ko01100,ko01110,ko01120,map00860,map00970,map01100,map01110,map01120	M00121,M00359,M00360	R05578	RC00055,RC00523	ko00000,ko00001,ko00002,ko01000,ko01007,ko02048,ko03016	-	-	-	tRNA-synt_1c
TP2_05455	644284.Arch_0178	2.32e-135	394.0	COG0008@1|root,COG0008@2|Bacteria,2GKMT@201174|Actinobacteria,4D361@85005|Actinomycetales	201174|Actinobacteria	J	Belongs to the class-I aminoacyl-tRNA synthetase family	gluQ	-	6.1.1.17	ko:K01885	ko00860,ko00970,ko01100,ko01110,ko01120,map00860,map00970,map01100,map01110,map01120	M00121,M00359,M00360	R05578	RC00055,RC00523	ko00000,ko00001,ko00002,ko01000,ko01007,ko02048,ko03016	-	-	-	tRNA-synt_1c
TP3_07565	644284.Arch_0178	2.32e-135	394.0	COG0008@1|root,COG0008@2|Bacteria,2GKMT@201174|Actinobacteria,4D361@85005|Actinomycetales	201174|Actinobacteria	J	Belongs to the class-I aminoacyl-tRNA synthetase family	gluQ	-	6.1.1.17	ko:K01885	ko00860,ko00970,ko01100,ko01110,ko01120,map00860,map00970,map01100,map01110,map01120	M00121,M00359,M00360	R05578	RC00055,RC00523	ko00000,ko00001,ko00002,ko01000,ko01007,ko02048,ko03016	-	-	-	tRNA-synt_1c
TP4_08600	644284.Arch_0178	2.32e-135	394.0	COG0008@1|root,COG0008@2|Bacteria,2GKMT@201174|Actinobacteria,4D361@85005|Actinomycetales	201174|Actinobacteria	J	Belongs to the class-I aminoacyl-tRNA synthetase family	gluQ	-	6.1.1.17	ko:K01885	ko00860,ko00970,ko01100,ko01110,ko01120,map00860,map00970,map01100,map01110,map01120	M00121,M00359,M00360	R05578	RC00055,RC00523	ko00000,ko00001,ko00002,ko01000,ko01007,ko02048,ko03016	-	-	-	tRNA-synt_1c
TP4479_03040	644284.Arch_0178	2.32e-135	394.0	COG0008@1|root,COG0008@2|Bacteria,2GKMT@201174|Actinobacteria,4D361@85005|Actinomycetales	201174|Actinobacteria	J	Belongs to the class-I aminoacyl-tRNA synthetase family	gluQ	-	6.1.1.17	ko:K01885	ko00860,ko00970,ko01100,ko01110,ko01120,map00860,map00970,map01100,map01110,map01120	M00121,M00359,M00360	R05578	RC00055,RC00523	ko00000,ko00001,ko00002,ko01000,ko01007,ko02048,ko03016	-	-	-	tRNA-synt_1c
TP8_09545	644284.Arch_0178	2.32e-135	394.0	COG0008@1|root,COG0008@2|Bacteria,2GKMT@201174|Actinobacteria,4D361@85005|Actinomycetales	201174|Actinobacteria	J	Belongs to the class-I aminoacyl-tRNA synthetase family	gluQ	-	6.1.1.17	ko:K01885	ko00860,ko00970,ko01100,ko01110,ko01120,map00860,map00970,map01100,map01110,map01120	M00121,M00359,M00360	R05578	RC00055,RC00523	ko00000,ko00001,ko00002,ko01000,ko01007,ko02048,ko03016	-	-	-	tRNA-synt_1c
TP_2849_04975	644284.Arch_0178	2.32e-135	394.0	COG0008@1|root,COG0008@2|Bacteria,2GKMT@201174|Actinobacteria,4D361@85005|Actinomycetales	201174|Actinobacteria	J	Belongs to the class-I aminoacyl-tRNA synthetase family	gluQ	-	6.1.1.17	ko:K01885	ko00860,ko00970,ko01100,ko01110,ko01120,map00860,map00970,map01100,map01110,map01120	M00121,M00359,M00360	R05578	RC00055,RC00523	ko00000,ko00001,ko00002,ko01000,ko01007,ko02048,ko03016	-	-	-	tRNA-synt_1c
UFV1_10975	644284.Arch_0178	2.69e-134	391.0	COG0008@1|root,COG0008@2|Bacteria,2GKMT@201174|Actinobacteria,4D361@85005|Actinomycetales	201174|Actinobacteria	J	Belongs to the class-I aminoacyl-tRNA synthetase family	gluQ	-	6.1.1.17	ko:K01885	ko00860,ko00970,ko01100,ko01110,ko01120,map00860,map00970,map01100,map01110,map01120	M00121,M00359,M00360	R05578	RC00055,RC00523	ko00000,ko00001,ko00002,ko01000,ko01007,ko02048,ko03016	-	-	-	tRNA-synt_1c
jx18_10430	644284.Arch_0178	3.3e-135	394.0	COG0008@1|root,COG0008@2|Bacteria,2GKMT@201174|Actinobacteria,4D361@85005|Actinomycetales	201174|Actinobacteria	J	Belongs to the class-I aminoacyl-tRNA synthetase family	gluQ	-	6.1.1.17	ko:K01885	ko00860,ko00970,ko01100,ko01110,ko01120,map00860,map00970,map01100,map01110,map01120	M00121,M00359,M00360	R05578	RC00055,RC00523	ko00000,ko00001,ko00002,ko01000,ko01007,ko02048,ko03016	-	-	-	tRNA-synt_1c
TP6375_05525	883066.HMPREF9233_01648	5.07e-184	518.0	COG0078@1|root,COG0078@2|Bacteria,2GJ6H@201174|Actinobacteria,4D445@85005|Actinomycetales	201174|Actinobacteria	E	Reversibly catalyzes the transfer of the carbamoyl group from carbamoyl phosphate (CP) to the N(epsilon) atom of ornithine (ORN) to produce L-citrulline	argF	-	2.1.3.3	ko:K00611	ko00220,ko01100,ko01110,ko01130,ko01230,map00220,map01100,map01110,map01130,map01230	M00029,M00844	R01398	RC00096	ko00000,ko00001,ko00002,ko01000	-	-	-	OTCace,OTCace_N
2012CQ_ZSH_05010	653386.HMPREF0975_00981	2.06e-183	516.0	COG0078@1|root,COG0078@2|Bacteria,2GJ6H@201174|Actinobacteria,4D445@85005|Actinomycetales	201174|Actinobacteria	E	Reversibly catalyzes the transfer of the carbamoyl group from carbamoyl phosphate (CP) to the N(epsilon) atom of ornithine (ORN) to produce L-citrulline	argF	-	2.1.3.3	ko:K00611	ko00220,ko01100,ko01110,ko01130,ko01230,map00220,map01100,map01110,map01130,map01230	M00029,M00844	R01398	RC00096	ko00000,ko00001,ko00002,ko01000	-	-	-	OTCace,OTCace_N
Arash114_05525	883066.HMPREF9233_01648	5.07e-184	518.0	COG0078@1|root,COG0078@2|Bacteria,2GJ6H@201174|Actinobacteria,4D445@85005|Actinomycetales	201174|Actinobacteria	E	Reversibly catalyzes the transfer of the carbamoyl group from carbamoyl phosphate (CP) to the N(epsilon) atom of ornithine (ORN) to produce L-citrulline	argF	-	2.1.3.3	ko:K00611	ko00220,ko01100,ko01110,ko01130,ko01230,map00220,map01100,map01110,map01130,map01230	M00029,M00844	R01398	RC00096	ko00000,ko00001,ko00002,ko01000	-	-	-	OTCace,OTCace_N
[truncated: 25,836 more rows]
