# Supplementary material for: Comparative Genome Analysis of 19 Trueperella pyogenes Strains Originating from Different Animal Species Reveal a Genetically Diverse Open Pan-Genome
Source: Antibiotics (Basel). 2022 Dec 24;12(1):24. doi: 10.3390/antibiotics12010024 (PMC9854608; doi:10.3390/antibiotics12010024)
Supplement: Supplementary file 1 [file antibiotics-12-00024-s001.zip › Table S7a-c Putative virulence factors VFDB.xlsx]

## Sheet: 7A B C
Suppl Table 7 a The table lists putative virulence factors belonging to the classes of adherence, iron uptake, regulation etc. as identified by VFanalyzer tool of VFDB database as well as by manual curation in the investigated T.pyogenes genomes.
VFclass	Virulence factors	Related genes	2012CQ-ZSH	Arash114	jx18	TP1	TP2	TP3	TP4	TP8	TP4479	Tp6375	TP-2849	Bu5	DSM 20630	MS249	NCTC5224	SH01	SH02	SH03	UFV1
Adherence	Collagen-binding protein	cbpA	-	-	-	-	-	-	-	-	-	-	-	-	-	-	-	-
	SpaA-type pili	spaA	-	-	-	-	-	-	-	-	-	-	-	-	-	-	-	-
		spaB	-	-	-	-	-	-	-	-	-	-	-	-	-	-	-	-
		spaC	-	-	-	-	-	-	-	-	-	-	-	-	-	-	-	-
		srtA	-	-	-	-	-	-	-	-	-	-	-	-	-	-	-	-
	SpaD-type pili	spaD	-	-	-	-	-	-	-	-	-	-	-	-	-	-	-	-
		spaE	-	-	-	-	-	-	-	-	-	-	-	-	-	-	-	-
		spaF	-	-	-	-	-	-	-	-	-	-	-	-	-	-	-	-
		srtB	orf00453	orf01644	orf01953	orf01835	orf00984	orf01592	orf01539	orf01989	orf00705	orf01634	orf01079	-	orf01197	-	orf01938	orf01101	orf01733	orf00901
		srtC	-	-	-	-	-	-	-	-	-	-	-	-	-	-	-	-
	SpaH-type pili	spaG	-	-	-	-	-	-	-	-	-	-	-	-	-	-	-	-
		spaH	-	-	-	-	-	-	-	-	-	-	-	-	-	-	-	-
		spaI	-	-	-	-	-	-	-	-	-	-	-	-	-	-	-	-
		srtD	-	-	-	-	-	-	-	-	-	-	-	-	-	-	-	-
		srtE	-	-	-	-	-	-	-	-	-	-	-	-	-	-	-	-
	Surface-anchored pilus proteins	sapA	-	-	-	-	-	-	-	-	-	-	-	-	-	-	-	-
		sapD	-	-	-	-	-	-	-	-	-	-	-	-	-	-	-	-
		sapE	-	-	-	-	-	-	-	-	-	-	-	-	-	-	-	-
Iron uptake	ABC transporter	fagA	-	-	-	-	-	-	-	-	-	-	-	-	-	-	-	-
		fagB	-	-	-	-	-	-	-	-	-	-	-	-	-	-	-	-
		fagC	-	-	-	orf01561	-	-	-	-	-	-	-	-	-	orf00797	-	-
		fagD	-	-	-	-	-	-	-	-	-	-	-	-	-	-	-	-
	ABC-type heme transporter	hmuT	-	-	-	-	-	-	-	-	-	-	-	-	-	-	-	-
		hmuU	orf01792	orf00279	orf00448	orf00509	orf01668	orf00814	orf00102	orf01293	orf02066	orf00275	orf00300	orf00129	orf00691	orf00214	orf01220	orf01567	orf00873	orf00256	orf00903
		hmuV	-	-	-	-	-	-	-	-	-	-	-	-	-	orf00213	-	-
	Ciu iron uptake and siderophore biosynthesis system	ciuA	orf00871	orf01223	orf01455	orf01431	orf00559	orf01999	orf01124	orf00308	orf01111	orf01219	orf01486	-	orf01677	orf00703	orf00276	orf00043	orf00320	orf01672	orf01828
		ciuB	orf00872	orf01222	orf01454	orf01430	orf00558	orf02000	orf01123	orf00309	orf01112	orf01218	orf01487	-	orf01678	orf00704	orf00277	orf00044	orf00319	orf01671	orf01827
		ciuC	orf00873	orf01221	orf01453	orf01429	orf00557	orf02001	orf01122	orf00310	orf01113	orf01217	orf01488	orf00555	orf01679	orf00705	orf00278	orf00045	orf00318	orf01670	orf01826
		ciuD	orf00874	orf01220	orf01452	orf01428	orf00556	orf02002	orf01121	orf00311	orf01114	orf01216	orf01489	orf00554	orf01680	orf00706	orf00279	orf00046	orf00317	orf01669	orf01825
		ciuE	-	-	-	-	-	-	-	-	-	-	-	-	-	-	-	-
	Siderophore-dependent iron uptake system	irp6A	-	-	-	-	-	-	-	-	-	-	-	-	-	-	-	-
		irp6B	-	-	-	-	-	-	-	-	-	-	-	-	-	-	-	-
		irp6C	-	-	-	-	-	-	-	-	`17	-	-	-	-	-	-	-
Regulation	Diphtheria toxin repressor DtxR	dtxR	-	-	-	-	-	-	-	-	-	-	-	-	-	-	-	-
	(p)ppGpp synthesis and hydrolysis(Mycobacterium)	relA	orf01688	orf00153	orf00549	orf00611	orf01795	orf00710	orf00206	orf01189	orf01962	orf00154	orf00196	orf00075	orf00589	orf01256	orf01115	orf01911	orf01230	orf00153	orf00420; orf00592
	PhoP/R(Mycobacterium)	phoP	orf00839	orf01252	orf01483	orf01460	orf00605	orf01971	orf01152	orf00280	orf01083	orf01248	orf01458	-		orf00675	orf00246	orf00012	orf00352	orf01703	orf01797
	RegX3(Mycobacterium)	regX3	orf00781	orf01309	orf01583	orf01518	orf00669	orf01913	orf01207	orf00220	orf01025	orf01305	orf01400	-	orf01444	orf01922	orf00182	orf01706	orf01978	orf01927	orf01567
	Sigma H(Mycobacterium)	sigH	orf00108	orf02039	orf00125	orf00180	orf01349	orf01137	orf01979	orf01609	orf00248	orf02026	orf00622	-	orf01318	orf01689		orf01270	orf01451	orf01963	orf01138
	Sigma A(Mycobacterium)	sigA/rpoV	-	orf00197	-	orf00566	orf01746	-		-	-	orf00197	-	-		orf01300					orf00464; orf00636
	WhiB3(Mycobacterium)	whiB3	orf01212	orf00868		-	orf00209	orf00209		orf00673	orf01461	orf00865	orf01836	-				orf00384		orf01326
Toxin	Diphtheria toxin (DT)	tox	-	-	-	-	-	-	-	-	-	-	-	-	-	-	-	-	-
	Phospholipase D	pld	-	-	-	-	-	-	-	-	-	-	-	-	-	-	-	-	-
Amino acid and purine metabolism	Lysine synthesis(Mycobacterium)	lysA	-	-	-	orf00202	-					-		-	orf01303	orf00850		orf01254			orf01064	238
	Glutamine synthesis(Mycobacterium)	glnA1	orf01762; orf01765	`	orf00475; orf00478	orf00536; orf00539	orf01715; orf01718	orf00784; orf00787	orf00129; orf00132	orf01263; orf01266	orf02036; orf02039	orf00224; orf00227	orf00270; orf00273	orf00118; orf00120	orf00661; orf00664	orf01046; orf01049	orf01190; orf01193	orf02031; orf02034	orf01306; orf01309	orf00226; orf00229	orf00491; orf00494; orf00663; orf00666	39
Anti-apoptosis factor	NuoG(Mycobacterium)	nuoG	orf00147	orf02000	orf00088	orf00144	orf01312	orf01174	orf01941	orf01649	orf00285	orf01988	orf00659	orf00945	orf01354	orf01622	orf01583	orf01305	orf01414	orf02002	orf01184	19
Lipid and fatty acid metabolism	Pantothenate synthesis(Mycobacterium)	panC	orf00189	orf01958	orf00045	orf00102	orf01270	orf01216	orf01899	-	orf00327	orf01945	orf00701	-		orf01582	orf01627	orf01347	orf01372	orf02044	orf01142	18
		panD	orf00188	orf01959	orf00046	orf00103	orf01271	orf01215	orf01900	orf01692	orf00326	orf01946	orf00700	-		orf01583	orf01626	orf01346	orf01373	orf02043	orf01143	18
Phagosome arresting	Nucleoside diphosphate kinase(Mycobacterium)	ndk	orf01928	orf00418	orf00312	orf00373	orf01535	orf00949	orf02168	orf01429	orf00061	orf00418	orf00434	-	orf00912	orf00467	orf01360	orf01431	orf01006	orf00392	orf00838	18
Protease	Proteasome-associated proteins(Mycobacterium)	mpa	orf01580	orf00052	orf00652	orf00712	orf01897	orf00609	orf00307	orf01081	orf01861	orf00053	orf00095	orf00023	orf00487	orf00358	orf01010	orf01807	orf01129	orf00052	orf00679	19
	Zn++ metallophrotease(Mycobacterium)	zmp1	orf02011	orf00449	orf00279	orf00336	orf01504	orf00981	orf02136	orf01462	orf00092	orf00448	orf00465	orf00213	orf00880	orf01385	orf01391	orf00556	orf01035	orf00423	orf00360	19
Stress adaptation	Iron-cofactored SOD(Mycobacterium)	sodA	orf01747	orf00210	orf00493	orf00554	orf01734	orf00768	orf00148	orf01246	orf02020	orf00209	orf00254	orf01747	orf00646	orf01312	orf01175	orf02051	orf01289	orf00211	orf00476; orf00648	20
Antiphagocytosis	Capsule(Klebsiella)	gnd	-	-	-	-	-	-	-	-	-	-	-	orf00645	orf01802		orf00099	orf01638	orf00788	orf01858	orf01521	7
Cell surface components	Trehalose-recycling ABC transporter(Mycobacterium)	sugC	-	-	-	-	-	-	-	-	-	-	-	orf00576		orf01768	orf00226	orf01749	orf02046	orf01204	orf00002	18
Immune evasion	Exopolysaccharide(Haemophilus)	galE	-	-	-	-	-	-	-	-	-	-	-	orf00237								1
Nutritional virulence	Pyrimidine biosynthesis(Francisella)	carB	-	-	-	-	-	-	-	-	-	-	-	orf00057								1
Secretion system	T6SS-II(Klebsiella)		-	-	-	-	-	-	-	-	-	-		orf00810; orf00836	orf01569	orf00987	orf01832	orf00996	orf01834	orf01023	orf02090	19
Antiphagocytosis	GPL locus(Mycobacterium)	rmlA	-	-	--	-	-	-	-	-	-	-	-	-	orf00011	orf01807	orf00504	orf00266	orf00093	orf01444	orf00193
Cell surface components	Capsule(Streptococcus)	rmlB	-	-		-	-	-	-	-	-	-	-	-	orf01781		orf00478	orf00242	orf00117	orf01468	orf00218	19
Immune evasion	Exopolysaccharide(Haemophilus)	galE	-	-	-	-	-	-	-	-	-	-	-	-	orf00424	orf00655	orf00947	orf00929	orf00622	orf00468	orf01877	7
		pgi	-	-	-	-	-	-	-	-	-	-	-	-	orf00158	orf01860	orf00666	orf00457	orf01607	orf01253	orf00141	7
Nutritional virulence	Pyrimidine biosynthesis(Francisella)															orf01228					orf00564; orf00752	20
																						507
		Yellow coloured boxes represents homologues detcted by VFanalyzer tool of VFDB database.
		Green coloured boxes represent homologues detected by BLASTN searches and manual curation.
Suppl Table 7 b. BLASTN search results of virulence factors namely pyolysin, collagen binding protein (CBPA), Neuraminidase (NanH and NanP) and fimbrial genes (fimA, fimC, fimE, and fimJ) in the investigated T.pyogenes genomes.
			BLAST and Manual curation results
S.No	Virulence factor	Reference sequence /Accession No	Description	Query Coverage	E value	Per. Ident (%)	Start position	End position	Strand	Protein sequence Accesion
1	plo (Pyolysin)	NZ_CP007519.1:c441071-439467; T. pyogenes TP6375	T. pyogenes strain TP6375	100	0	100	439467	441071	Minus	AHU88994.1
			T. pyogenes strain UFV1 _contig_2_consensus_4, WGS	100	0	100	6260	7864	Minus	OQD39241.1									98 green
			T. pyogenes strain TP1	100	0	99.07	433458	435062	Plus	AZR00149.1									402
			T. pyogenes strain TP2	100	0	99.07	1720350	1721954	Plus	AZR03175.1									98
			T. pyogenes strain Arash114	100	0	99.07	439416	441020	Minus	AWA42913.1
			T. pyogenes MS249 MS249_contig13	100	0	99	8446	10050	Plus	WP_024963420.1
			T. pyogenes strain TP4	100	0	96.95	2399209	2400813	Plus	AZR07733.1
			T. pyogenes strain TP3	100	0	96.95	1026267	1027871	Minus	AZR04625.1
			T. pyogenes strain TP4479	100	0	96.95	54538	56142	Minus	AWG03012.1
			T. pyogenes strain TP-2849	100	0	96.95	472864	474468	Minus	AWG15740.1
			T. pyogenes strain SH01 scaffold5, WGS	100	0	96.88	39387	40991	Plus	WP_114949765.1
			T. pyogenes strain SH03 contig1, WGS	100	0	96.88	426750	428354	Minus	WP_114949765.1
			T. pyogenes strain SH02 contig11, WGS	100	0	96.88	162685	164289	Minus	WP_114949765.1
			T. pyogenes strain jx18	100	0	96.82	384468	386072	Plus	QIU86052.1
			T. pyogenes strain 2012CQ-ZSH	100	0	96.64	2122001	2123605	Minus	ALD74485.1
			T. pyogenes TP8	100	0	96.57	1504574	1506178	Minus	AJC69836.1
			T. pyogenes strain NCTC5224, contig: ERS1434927SCcontig000002, WGS	100	0	96.57	1362930	1364534	Minus	WP_039662662.1
			T. pyogenes strain DSM 20630 Ga0197550_02, WGS	100	0	96.57	201452	203056	Plus	MBB3025028.1
			T. pyogenes strain Bu5 contig00002, WGS	99	0	80.8	80784	82381	Plus	PIN51680.1
S.No	Virulence factor	Accession No	Description	Query Coverage	E value	Per. Ident (%)	Start position	End position	Strand	Protein sequence Accesion
2	cbpA	AY223543.1:1262-4717;Trueperella pyogenes	T. pyogenes strain TP1	100	0	96.21	2133341	2136790	Plus	AZR01540.1
			T. pyogenes strain jx18	100	0	89.36	2250716	2254174	Plus	QIU87555.1
			T. pyogenes strain TP4	100	0	89.36	1858919	1862392	Plus	AZR07349.1
			T. pyogenes strain TP3	100	0	89.36	1632669	1636127	Minus	AZR05072.1
			T. pyogenes strain TP4479	100	0	89.36	658533	661991	Minus	AWG03459.1
			T. pyogenes strain TP-2849	100	0	89.36	1079281	1082739	Minus	AWG16190.1
			T. pyogenes strain Arash114	100	0	87.51	1885779	1889249	Plus	AWA44089.1
			T. pyogenes strain TP6375	88	0	90.95	1885881	1889336	Plus	AHU90046.1
			T. pyogenes TP8	100	0	85.33	2016390	2019842	Minus	AJC70165.1
			T. pyogenes strain 2012CQ-ZSH	58	0	95.93	373203	376625	Minus	WP_196332736.1
			T. pyogenes strain TP2	57	0	98.11	1198145	1201030	Plus	AZR02800.1
			T. pyogenes strain SH01 scaffold15,WGS	53	0	97.66	12761	13786	Minus	WP_127815418.1
			T. pyogenes strain UFV1 _contig_9_consensus_4,WGS	71	0	96.22	1	2463	Plus	OQD33446.1
			T. pyogenes strain SH02 contig18,WGS	88	0	90.64	4302	7757	Minus	WP_164978176.1
			T. pyogenes strain SH03 contig14,WGS	70	0	82.42	19359	22142	Plus	WP_164978176.1
			T. pyogenes strain DSM 20630 Ga0197550_07,WGS	100	0	89.25	17925	21383	Plus	MBB3025490.1
			T. pyogenes strain NCTC5224 WGS, contig: ERS1434927SCcontig000002	100	0	89.25	1900748	1904206	Minus	SUO88028.1
			T. pyogenes MS249 MS249_contig44,WGS	87	0	91.79	1651	4674	Plus	WP_160164922.1
			T. pyogenes strain Bu5 contig00003,WGS	100	0	98.41	143352	146822	Minus	PIN51322.1
S.No	Virulence factor	Accession No	Description	Query Coverage	E value	Per. Ident (%)	Start position	End position	strand	Protein sequence Accesion
3	nanH	AF298154.1:966-3977; Trueperella pyogenes	T. pyogenes strain TP2	100	0	87.62	186936	189887	Plus	AZR01983.1
			T. pyogenes strain TP6375	82	0	87.16	870290	872836	Plus	WP_158506097.1
			T. pyogenes strain Arash114	100	0	84.15	869769	872748	Plus	This particular region corresponds to two different proteins
			T. pyogenes strain 2012CQ-ZSH	81	0	86.27	1397654	1400065	Minus	WP_196332722.1
			T. pyogenes TP8	93	0	88.05	770230	773007	Minus	AJC69304.1
			T. pyogenes strain jx18	99	0	86.72	1092540	1094923	Plus	QIU86624.1
			T. pyogenes strain TP3	88	0	82.98	320478	323861	Minus	AZR04057.1
			T. pyogenes strain TP4479	88	0	82.98	1730995	1734378	Minus	AWG04339.1
			T. pyogenes strain TP-2849	88	0	82.98	2151743	2155126	Minus	AWG17066.1
			T. pyogenes strain TP4	88	0	82.42	718162	721473	Plus	AZR06434.1
			T. pyogenes strain TP1	88	0	81.62	1133393	1136767	Plus	AZR00725.1
			T. pyogenes strain SH02 scaffold2,WGS	88	0	82.42	19451	21489	Minus	WP_170967673.1
			T. pyogenes strain SH03 contig12,WGS	88	0	82.42	19359	21397	Minus	WP_164717784.1
			T. pyogenes strain UFV1 _contig_6_consensus_1,WGS	78	0	87.59	17	2284	Plus	WP_218670722.1
			T. pyogenes strain SH01 scaffold2,WGS	81	0	87.11	18923	21340	Minus	WP_167554447.1
			T. pyogenes strain DSM 20630 Ga0197550_01,WGS	81	0	87.53	185134	187563	Minus	MBB3024287.1
			T. pyogenes strain NCTC5224, contig: ERS1434927SCcontig000002,WGS	96	0	89.5	653737	656628	Minus	SUO86952.1
			T. pyogenes strain Bu5 contig00001,WGS	99	0	84.06	465681	468617	Minus	PIN52451.1
			T. pyogenes MS249 MS249_contig40,WGS	100	0	85.84	68054	71017	Plus	WP_024964048.1
S.No	Virulence factor	Accession No	Description	Query Coverage	E value	Per. Ident (%)	Start position	End position	strand	Protein sequence Accesion
4	nanP	AY045771.1:1026-6239; Trueperella pyogenes	T. pyogenes strain jx18	98	0	98.16	1748762	1753930	Minus	QIU87169.1
			T. pyogenes TP8	70	0	98.93	192750	196403	Minus	AJC68877.1
			T. pyogenes strain TP-2849	100	0	98.13	1537464	1542695	Plus	AWG16543.1
			T. pyogenes strain TP1	100	0	98.1	1694876	1700089	Plus	AZR01201.1
			T. pyogenes strain TP2	100	0	97.7	747453	752648	Minus	AZR02452.1
			T. pyogenes strain TP3	100	0	98.13	2090849	2096080	Plus	AZR05421.1
			T. pyogenes strain TP4	100	0	98.13	1338259	1343490	Minus	AZR06946.1
			T. pyogenes strain TP4479	100	0	98.13	1116716	1121947	Plus	AWG03812.1
			T. pyogenes strain 2012CQ-ZSH ,	100	0	98.5	843337	848550	Plus	WP_196332743.1
			T. pyogenes MS249 MS249_contig94,WGS	55	0	98.62	1	2906	Plus	WP_024964798.1
			T. pyogenes strain Bu5 contig00005,WGS	100	0	99.37	103031	108244	Minus	PIN50932.1
			T. pyogenes strain NCTC5224, contig: ERS1434927SCcontig000002,WGS	98	0	98.09	81154	86385	Plus	SUO86417.1
			No sequence simlarity (NSS) was found in rest of the investigated strains
S.No	Virulence factor	Accession No	Description	Query Coverage	E value	Per. Ident (%)	Start position	End position	strand	Protein sequence Accesion
5	fimA	NZ_CP007519.1:1892212-1893604; T. pyogenes TP6375	T. pyogenes strain TP6375	100	0	100	1892212	1893604	Plus	AHU90603.1
			T. pyogenes strain 2012CQ-ZSH	21	2e-131	96.26	372864	373157	Minus	ALD73260.1
			T. pyogenes strain TP1	100	0	98.99	2139663	2141054	Plus	AZR01542.1
			T. pyogenes TP8	100	0	98.64	2012118	2013509	Minus	AJC70709.1
			T. pyogenes strain TP2	100	0	98.56	1203906	1205297	Plus	AZR02802.1
			T. pyogenes strain Arash114	100	0	98.49	1892125	1893516	Plus	AWA44091.1
			T. pyogenes strain jx18	100	0	98.42	2257056	2258447	Plus	QIU87557.1
			T. pyogenes strain TP4	100	0	98.42	1865274	1866665	Plus	AZR07351.1
			T. pyogenes strain TP3	100	0	98.42	1628396	1629787	Minus	AZR05779.1
			T. pyogenes strain TP4479	100	0	98.42	654260	655651	Minus	AWG03457.1
			T. pyogenes strain TP-2849	100	0	98.42	1075008	1076399	Minus	AWG16188.1
			T. pyogenes strain DSM 20630 Ga0197550_07,WGS	21	3e-130	95.92	21429	21722	Plus	MBB3025491.1
			T. pyogenes strain NCTC5224, contig: ERS1434927SCcontig000002,WGS	21	3e-130	95.92	1900409	1900702	Minus	SUO88027.1
			T. pyogenes strain UFV1 _contig_9_consensus_4, WGS	100	0	100	5339	6731	Plus	OQD33448.1
			T. pyogenes MS249 MS249_contig44,WGS	100	0	98.35	7550	8941	Plus	WP_024964243.1
			T. pyogenes strain SH02 contig18,WGS	100	0	98.35	32	1423	Minus	WP_024964243.1
			T. pyogenes strain SH03 contig14,WGS	100	0	98.35	94536	95927	Plus	WP_024964243.1
			T. pyogenes strain Bu5 contig00003,WGS	100	0	98.64	139086	140477	Minus	PIN51595.1
			T. pyogenes strain SH01 scaffold15,WGS	100	0	98.64	8495	9886	Minus	WP_114950114.1
S.No	Virulence factor	Accession No	Description	Query Coverage	E value	Per. Ident (%)	Start position	End position	strand	Protein sequence Accesion
6	fimC	NZ_CP007519.1:c643890-642484; T. pyogenes TP6375	T. pyogenes strain TP6375	100	0	100	642484	643890	Minus	AHU90433.1
			T. pyogenes strain TP2	100	0	98.79	20787	22193	Minus	AZR03624.1
			T. pyogenes TP8	100	0	98.72	972458	973864	Plus	AJC70545.1
			T. pyogenes strain Arash114	100	0	98.65	642427	643833	Minus	AWA44470.1
			T. pyogenes strain 2012CQ-ZSH	100	0	98.44	1582286	1583692	Plus	ALD74091.1
			T. pyogenes strain jx18	100	0	98.08	915351	916757	Minus	QIU86487.1
			T. pyogenes strain TP1	99	0	95.49	960020	961417	Minus	AZR01753.1
			T. pyogenes strain TP4	99	2e-165	70.08	507037	508431	Minus	AZR07801.1
			T. pyogenes strain TP3	99	6e-164	70.01	491437	492831	Plus	AZR04188.1
			T. pyogenes strain TP4479	99	6e-164	70.01	1901954	1903348	Plus	AWG04472.1
			T. pyogenes strain TP-2849	99	6e-164	70.01	2322702	2324096	Plus	AWG17200.1
			T. pyogenes strain SH01 scaffold2,WGS	99	2e-165	70.08	185151	186545	Plus	WP_164717777.1
			T. pyogenes strain SH02 contig4,WGS	99	1e-166	70.07	191736	193130	Plus	WP_164978161.1
			T. pyogenes strain SH03 contig10,WGS	99	1e-166	70.07	99452	100846	Minus	WP_164978161.1
			T. pyogenes strain Bu5 contig00001,WGS	99	0	95.78	637526	638923	Plus	PIN52579.1
			T. pyogenes strain DSM 20630 Ga0197550_01,WGS	100	0	98.58	362687	364093	Plus	MBB3024447.1
			T. pyogenes strain NCTC5224, contig: ERS1434927SCcontig000002,WGS	100	0	98.58	831290	832696	Plus	SUO87109.1
			T. pyogenes MS249 MS249_contig68,WGS	100	0	98.79	46960	48366	Plus	WP_080689245.1
			T. pyogenes strain UFV1 _contig_6_consensus_10,WGS	100	0	100	7627	9033	Minus	OQD38731.1
S.No	Virulence factor		Description	Query Coverage	E value	Per. Ident (%)	Start position	End position	strand	Protein sequence Accesion
7	fimE	NZ_CP007519.1:c1396710-1394959; T. Pyogenes TP6375	T. pyogenes strain TP6375	100	0	100	394959	1396710	Minus	AHU90532.1
			T. pyogenes strain Arash114	100	0	98.23	1394883	1396634	Minus	AWA43705.1
			T. pyogenes strain TP3	100	0	98.01	2135605	2137359	Plus	AZR05453.1
			T. pyogenes strain TP-2849	100	0	98.01	1582220	1583974	Plus	AWG16574.1
			T. pyogenes strain TP4479	100	0	98.01	1161472	1163226	Plus	AWG03844.1
			T. pyogenes strain TP2	100	0	97.95	709153	710904	Minus	AZR02421.1
			T. pyogenes strain TP1	100	0	97.95	1656576	1658327	Minus	AZR01170.1
			T. pyogenes TP8	100	0	96.47	237299	239053	Plus	AJC70395.1
			T. pyogenes strain 2012CQ-ZSH	100	0	96.41	888082	889836	Plus	ALD73597.1
			T. pyogenes strain jx18	99	0	74.18	1699668	1701412	Minus	QIU87133.1
			T. pyogenes strain TP4	99	0	74.12	1289038	1290782	Minus	AZR06910.1
			T. pyogenes strain UFV1 _contig_5_consensus_24,WGS	100	0	100	9017	10768	Minus	OQD36921.1
			T. pyogenes strain SH03 contig8,WGS	100	0	97.77	134774	136525	Plus	WP_129288722.1
			T. pyogenes strain SH01 scaffold6,WGS	100	0	96.75	136824	138578	Plus	WP_114949869.1
			T. pyogenes strain SH02 contig23,WGS	100	0	96.7	24801	26555	Minus	WP_137240412.1
			T. pyogenes strain Bu5 contig00005,WGS	100	0	95.34	48604	50361	Plus	PIN50888.1
			T. pyogenes MS249 MS249_contig67,WGS	87	0	74.2	6832	8374	Plus	WP_024964588.1
			T. pyogenes strain NCTC5224, contig: ERS1434927SCcontig000002,WGS	99	2e-172	68.55	134675	136420	Plus	SUO86459.1
			T. pyogenes strain DSM 20630 Ga0197550_08,WGS	99	2e-172	68.55	42105	43850	Minus	MBB3025567.1
S.No	Virulence factor	Accession No	Description	Query Coverage	E value	Per. Ident (%)	Start position	End position	strand	Protein sequence Accesion
8	fimJ	NZ_CP007519.1:1750700-1752502; T. pyogenes TP6375	T. pyogenes strain TP6375	100	0	100	1750700	1752502	Plus	AHU90586.1
			T. pyogenes strain Arash114	100	0	99.06	1750602	1752401	Plus	AWA43982.1
			T. pyogenes strain jx18	26	3e-66	99.26	2112193	2113830	Plus	QIU87444.1
			T. pyogenes strain TP4	26	3e-66	99.26	1660550	1662226	Plus	AZR07191.1
			T. pyogenes strain TP3	26	3e-66	99.26	1772983	1774659	Minus	AZR05790.1
			T. pyogenes strain TP-2849	26	3e-66	99.26	1219596	1221272	Minus	AWG17332.1
			T. pyogenes strain TP4479	26	3e-66	99.26	798848	800524	Minus	AWG04912.1
			T. pyogenes strain 2012CQ-ZSH	17	3e-66	99.26	522405	524033	Minus	ALD73358.1
			T. pyogenes strain TP2	19	3e-65	98.52	1061106	1062764	Plus	AZR02689.1
			T. pyogenes TP8	20	1e-63	97.78	2148235	2149854	Minus	AJC70731.1
			T. pyogenes strain TP1	21	9e-60	95.56	2001270	2002937	Plus	AZR01437.1
			T. pyogenes MS249 MS249_contig112,WGS	20	2e-61	96.32	c2427	808	Plus	WP_024964845.1
			T. pyogenes strain SH02 contig17,WGS	20	2e-62	99.22	32585	34333	Plus	WP_164978170.1
			T. pyogenes strain SH03 contig13,WGS	20	2e-62	99.22	32612	34360	Plus	WP_164978170.1
			T. pyogenes strain DSM 20630 Ga0197550_05,WGS	40	3e-65	98.52	12385	14007	Plus	MBB3025301.1
			T. pyogenes strain NCTC5224, contig: ERS1434927SCcontig000002,WGS	40	3e-65	98.52	2035980	2037602	Minus	SUO88153.1
			T. pyogenes strain SH01 scaffold3,WGS	17	3e-66	99.26	c136807	135179	Minus	WP_167554458.1
			T. pyogenes strain Bu5	No significant similarity found
			T. pyogenes strain UFV1
Suppl Table 7 c. The table lists BLASTN search results of virulence factors in the investigated genome T.pyogenes genomes that showed differential distrbution in VFanalyzer results belonging to the classes of adherence, iron uptake, regulation etc. .
VFclass	Virulence factors	Related genes	Reference gene used for homolog detection	Refrence gene used for homolog searching is related to belowmentioned gene as detcted by Vfanalyzer tool	Name of the strain	Query Coverage	E value	Per. ident	Start position	End position	Strand
Regulation	Sigma A(Mycobacterium)	sigA/rpoV	T. pyogenes strain TP6375 ; orf00197		T. pyogenes 2012CQ-ZSH	0.47	2e-156	0.7741	1916944	1917657	Minus
			Contig: NZ_CP007519.1		T. pyogenes TP4	0.48	8e-154	0.7713	177097	177810	Plus
			Start: 221883		T. pyogenes TP3	0.48	8e-154	0.7713	821932	822645	Minus
			End: 223358		T. pyogenes jx18	0.48	4e-152	0.7699	589561	590274	Plus
			Length: 1476		T. pyogenes TP8	0.47	1e-156	0.7741	1299326	1300039	Minus
			Strand: Minus		T. pyogenes TP-2849	0.48	6e-154	0.7713	268529	269242	Minus
				Mycobacterium canettii	T. pyogenes TP4479	0.48	6e-154	0.7713	2232455	2233168	Minus
				YP_007265432	NZ_PESV01000002.1 T. pyogenes Bu5 contig00002 WGS	0.45	3e-158	0.7755	286762	287475	Plus
					JACHWO010000001.1 T. pyogenes DSM 20630 Ga0197550_01 WGS	0.48	2e-154	0.7713	689189	689902	Minus
					UHHW01000002.1 T. pyogenes NCTC5224 genome assembly contig: ERS1434927SCcontig000002 WGS	0.48	2e-154	0.7713	1157790	1158503	Minus
					SPVE01000009.1 T. pyogenes SH01 scaffold9 WGS	0.45	4e-157	0.7741	40129	40842	Plus
					ML241298.1 T. pyogenes SH02 genomic scaffold scaffold5 WGS	0.45	2e-154	0.7713	222047	222760	Minus
					RWKU01000001.1 T. pyogenes SH03 contig1 WGS	0.45	3e-158	0.7755	222963	223676	Minus
Amino acid and purine metabolism	Lysine synthesis(Mycobacterium)	lysA	T. pyogenes strain TP1 ; orf00202		Name of the strain	Query Coverage	E value	Per. ident	Start position	End position	Strand
			Contig: NZ_CP033902.1		T. pyogenes Arash114	0.23	6e-09	0.6531	2225098	2225428	Plus
			Start: 211870		T. pyogenes TP2	0.23	8e-08	0.6501	1504243	1504573	Plus
			End: 213159		T. pyogenes jx18	0.11	1e-05	0.6726	161598 1	161763	Plus
			Length: 1290		T. pyogenes 2012CQ-ZSH	0.11	1e-05	0.6726	109170	109335	Minus
			Strand: Plus		T. pyogenes TP4479	0.11	1e-05	0.6726	279332	279497	Minus
					T. pyogenes TP8	0.11	1e-05	0.6726	1709696	1709861	Minus
				Mycobacterium sp. JLS	T. pyogenes TP4	0.11	1e-05	0.6726	2173138	2173303	Plus
				YP_001072150	T. pyogenes TP3	0.11	1e-05	0.6726	1251046	1251211	Minus
					T. pyogenes TP6375	0.26	4e-08	0.6501	2225210	2225540	Plus
					T. pyogenes TP-2849	0.14	6e-06	0.6726	697656	697821	Minus
					NZ_PESV01000004.1 T. pyogenes Bu5 contig00004 WGS	0.26	2e-09	0.6531	107524	107854	Minus
					JACHWO010000006.1 T. pyogenes DSM 20630 Ga0197550_06 WGS	0.14	3e-06	0.6726	16308	16473	Minus
					RSAH02000022.1 T. pyogenes SH02 contig22 WGS	0.14	3e-06	0.6726	3101	3266	Plus
					RWKU01000017.1 T. pyogenes SH03 contig17 WGS	0.14	3e-06	0.6726	3504	3669	Plus
Antiphagocysis	Capsule(Klebsiella)	gnd	T. pyogenes strain Bu5; orf01893		Name of the strain	Query Coverage	E value	Per. ident	Start position	End position	Strand
			Contig: NZ_PESV01000005.1		T. pyogenes TP2	0.2	1e-12	0.7882	787056	787140	Plus
			Start: 137361		T. pyogenes TP1	0.2	1e-12	0.7882	1729741	1729825	Plus
			End: 138812		T. pyogenes Arash114	0.2	1e-12	0.7882	1468435	1468519	Plus
			Length: 1452		T. pyogenes 2012CQ-ZSH	0.22	1e-12	0.7882	808389	808473	Minus
			Strand: Plus	Klebsiella pneumoniae subsp. pneumoniae MGH 78578	T. pyogenes Arash114	0.2	1e-12	0.7882	1468435	1468519	Plus
				YP_001336147.1	T. pyogenes TP4	0.19	1e-11	0.8082	1381220	1381292	Plus
					T. pyogenes TP3	0.19	1e-11	0.8082	2053045	2053117	Minus
					T. pyogenes TP4479	0.19	9e-12	0.8082	1078912	1078984	Minus
					T. pyogenes TP6375	0.2	1e-12	0.7882	1468532	1468616	Plus
					T. pyogenes TP8	0.2	1e-12	0.7882	157668	157752	Minus
					T. pyogenes TP-2849	0.19	1e-11	0.8082	1499660	1499732	Minus
					T. pyogenes jx18	0.19	3e-12	0.8082	1791774	1791846	Plus
Cell surface components	Trehalose-recycling ABC transporter(Mycobacterium)	sugC	T. pyogenes strain Bu5; orf01779		Name of the strain	Query Coverage	E value	Per. ident	Start position	End position	Strand
			Contig: NZ_PESV01000005.1		T. pyogenes TP4479	0.53	1e-67	0.6986	1211823	1212460	Minus
			Start: 3900		T. pyogenes TP6375	0.53	3e-63	0.694	1348116	1348753	Plus
			End: 5087	Mycobacterium marinum M	T. pyogenes 2012CQ-ZSH	0.53	4e-61	0.6884	938195	938832	Minus
			Length: 1188	YP_001852466	T. pyogenesTP8	0.53	4e-61	0.6884	286100	286737	Minus
			Strand: Plus		T. pyogenes TP2	0.53	1e-67	0.6986	659622	660259	Plus
					T. pyogenes TP1	0.53	1e-67	0.6986	1616765	1617402	Plus
					T. pyogenes jx18	0.53	1e-67	0.6986	1348054	1348691	Plus
					T. pyogenes Arash114	0.53	1e-67	0.6986	1348054	1348691	Plus
					T. pyogenes TP-2849	0.53	1e-67	0.6986	1632571	1633208	Minus
					T. pyogenes TP4	0.53	1e-67	0.6986	1244083	1244720	Plus
					T. pyogenes TP3	0.53	1e-67	0.6986	2185956	2186593	Minus
					JACHWO010000005.1 T. pyogenes DSM 20630 Ga0197550_05, WGS	0.02	0.0003	0.9032	75487	75517	Plus
Immune evasion	Exopolysaccharide(Haemophilus)	galE	T. pyogenes strain Bu5; orf00688		Name of the strain	Query Coverage	E value	Per. ident	Start position	End position	Strand
			Contig: NZ_PESV01000001.1		T. pyogenes TP4479	0.04	0.0004	0.8182	1994828	1994871	Minus
			Start: 733181		T. pyogenes 2012CQ-ZSH	0.04	0.0004	0.8182	1675155	1675198	Minus
			End: 734224		T. pyogenes TP6375	0.04	0.0004	0.8182	547181	547224	Plus
			Length: 1044		T. pyogenesTP8	0.04	0.0004	0.8182	1065327	1065370	Minus
			Strand: Minus		T. pyogenes TP2	0.04	0.0004	0.8182	2170707	2170750	Plus
					T. pyogenes TP1	0.04	0.0004	0.8182	864714	864757	Plus
					T. pyogenes Arash114	0.04	0.0004	0.8182	547122	547165	Plus
				Haemophilus somnus 2336	T. pyogenes TP-2849	0.04	0.0004	0.8182	30902	30945	Minus
				YP_001784580	T. pyogenes jx18	0.04	0.0003	0.8182	823836	823879	Plus
					T. pyogenes TP4	0.04	0.0003	0.8182	415517	415560	Plus
					T. pyogenes TP3	0.04	0.0003	0.8182	584309	584352	Minus
					JACHWO010000001.1 T. pyogenes DSM 20630 Ga0197550_01, WGS	0.08	8e-05	0.8182	455573	455616	Minus
					JALQ01000019.1 T. pyogenes MS249 MS249_contig19, WGS	0.08	8e-05	0.8182	42010	42053	Minus
					UHHW01000002.1 T. pyogenes NCTC5224 genome assembly, contig: ERS1434927SCcontig000002, WGS	0.08	9e-05	0.8182	924174	924217	Minus
					SPVE01000002.1 T. pyogenes SH01 scaffold2, WGS	0.08	9e-05	0.8182	278015	278058	Minus
					ML241296.1 T. pyogenes SH02 genomic scaffold scaffold2, WGS	0.08	9e-05	0.8182	284654	284697	Minus
					RWKU01000010.1 T. pyogenes SH03 contig10, WGS	0.08	9e-05	0.8182	7936	7979	Plus
					MVGS01000017.1 T. pyogenes UFV1 _contig_8_consensus_0, WGS	0.04	9e-05	0.8182	13	56	Plus
Nutritional virulence		carB	T. pyogenes strain Bu5; orf01021		Name of the strain	Query Coverage	E value	Per. ident	Start position	End position	Strand
			Contig: NZ_PESV01000002.1		T. pyogenes 2012CQ-ZSH	0.04	5e-08	0.6855	1818807	1818959	Minus
			Start: 376352		T. pyogenes TP6375	0.04	5e-08	0.6855	131156	131308	Minus
			End: 379618		T. pyogenesTP8	0.04	5e-08	0.6855	1209213	1209365	Minus
			Length: 3267		T. pyogenes TP2	0.04	5e-08	0.6855	2029030	2029182	Plus
			Strand: Plus	Francisella tularensis subsp. tularensis TIGB03	T. pyogenes TP1	0.04	5e-08	0.6855	723710	723862	Plus
	Pyrimidine biosynthesis(Francisella)			YP_005306238.1	T. pyogenes Arash114	0.04	5e-08	0.6855	131149	131301	Minus
					T. pyogenes jx18	0.04	4e-08	0.6855	680221	680373	Plus
					JACHWO010000001.1 T. pyogenes DSM 20630 Ga0197550_01, WGS	0.04	1e-08	0.6855	599045	599197	Minus
					SPVE01000007.1 T. pyogenes SH01 scaffold7, WGS	0.04	1e-08	0.6855	128719	128871	Minus
					MVGS01000003.1 T. pyogenes UFV1 _contig_2_consensus_12, WGS	0.04	1e-08	0.6855	84930	85082	Minus
					JALQ01000042.1 T. pyogenes MS249 MS249_contig42, WGS	0.04	1e-08	0.6855	75433	75585	Minus
					Remaining investigated strains showed no sequence similarity (NSS)
Secretion system	T6SS-II(Klebsiella)		T. pyogenes strain UFV1; orf02090		Name of the strain	Query Coverage	E value	Per. ident	Start position	End position	Strand
			Contig: MVGS01000084.1		T. pyogenes TP4479	0.48	3e-67	0.6886	684618	685318	Minus
			Start: 11845		T. pyogenes 2012CQ-ZSH	0.48	3e-67	0.6886	399204	399904	Minus
			End: 14472		T. pyogenes TP6375	0.48	3e-67	0.6886	1862572	1863272	Plus
			Length: 2628		T. pyogenesTP8	0.48	3e-67	0.6886	2042463	2043163	Minus
			Strand: Plus	Klebsiella oxytoca KCTC 1686	T. pyogenes TP2	0.48	7e-69	0.7062	1176001	1176561	Plus
				YP_005015987.1	T. pyogenes TP1	0.48	3e-67	0.6886	2110017	2110717	Plus
					T. pyogenes Arash114	0.48	3e-67	0.7044	1863577	1864137	Plus
					T. pyogenes TP-2849	0.48	3e-67	0.6886	1105366	1106066	Minus
					T. pyogenes TP4	0.48	2e-67	0.6886	1835605	1836305	Plus
					T. pyogenes TP3	0.48	2e-67	0.6886	1658754	1659454	Minus
					T. pyogenes jx18	0.48	3e-66	0.7027	2228490	2229050	Plus
Antiphagocysis	GPL locus(Mycobacterium)	rmlA	T. pyogenes strain UFV1; orf00193		Name of the strain	Query Coverage	E value	Per. ident	Start position	End position	Strand
			Contig: MVGS01000035.1		T. pyogenes strain TP6375	1	0	100	1047469	1048257	Plus
			Start: 20138		T. pyogenes strain TP2	1	0	99.75	354105	354893	Plus
			End: 20926		T. pyogenes strain Arash114	1	0	99.11	1047375	1048163	Plus
			Length: 789		T. pyogenes strain TP3	1	0	98.99	101315	102103	Minus
			Strand: Plus	Mycobacterium abscessus subsp. bolletii str. GO 06	T. pyogenes strain TP1	1	0	98.99	1311314	1312102	Plus
				YP_006522025	T. pyogenes strain TP-2849	1	0	98.99	1932580	1933368	Minus
					T. pyogenes strain TP4479	1	0	98.99	1511832	1512620	Minus
					T. pyogenes strain 2012CQ-ZSH	1	0	98.99	1228646	1229434	Minus
					T. pyogenes strain TP4	1	0	98.86	950382	951170	Plus
					T. pyogenes TP8	1	0	98.86	588315	589103	Minus
					T. pyogenes strain jx18	1	0	98.61	1320748	1321536	Plus
					NZ_PESV01000001.1 T. pyogenes strain Bu5 contig00001, whole genome shotgun sequence	1	0	99.24	294520	295308	Minus
			T. pyogenes strain UFV1; orf00218		Name of the strain	Query Cover	E value	Per. ident	Start position	End position	Strand
			Contig: MVGS01000035.1		T. pyogenes strain TP6375	1	0	100	1076760	1077755	Plus
			Start: 49429		T. pyogenes strain TP2	1	0	99.3	383396	384391	Plus
			End: 50424		T. pyogenes strain TP1	1	0	99.1	1340605	1341600	Plus
			Length: 996		T. pyogenes strain Arash114	0.99	0	99.1	1076667	1077661	Plus
			Strand: Plus		T. pyogenes strain jx18	1	0	98.09	1350039	1351034	Plus
					T. pyogenes strain TP3	1	0	98.09	71817	72812	Minus
Cell surface components	Capsule(Streptococcus)	rmlB		Streptococcus mutans UA159; NP_721810	T. pyogenes strain TP-2849	1	0	98.09	1903082	1904077	Minus
					T. pyogenes strain TP4479	1	0	98.09	1482334	1483329	Minus
					T. pyogenesstrain 2012CQ-ZSH	1	0	97.99	1199151	1200146	Minus
					T.pyogenes TP8	1	0	97.99	558817	559812	Minus
					T. pyogenes strain TP4	1	0	97.89	979673	980668	Plus
					NZ_PESV01000001.1 T. pyogenes strain Bu5 contig00001, whole genome shotgun sequence	1	0	98.29	265022	266017	Minus
					JALQ01000078.1 T. pyogenes MS249 MS249_contig78, whole genome shotgun sequence	1	0	98.49	4997	5992	Minus
			T. pyogenes strain TP6375 ;orf01248	Mycobacterium avium 104	Name of the strain	Query Coverage	E value	Per. ident	Start position	End position	Strand
			Contig: NZ_CP007519.1		NZ_PESV01000001.1 T. pyogenes Bu5 contig00001, WGS	0.4	7e-17	0.7222	2850	13009	Minus
			Start: 1329607		JACHWO010000001.1 T. pyogenes DSM 20630 Ga0197550_01, WGS	0.11	6e-05	0.8333	29660	29706	Plus
			End: 1330344
			Length: 738
Regulation	PhoP/R(Mycobacterium)	phoP	Strand: Plus
			T. pyogenes strain TP6375 ; orf01305		Name of the strain	Query Coverage	E value	Per. ident	Start position	End position	Strand
			Contig: NZ_CP007519.1		NZ_PESV01000005.1 T. pyogenes Bu5 contig00005, WGS	0.78	5e-37	0.6691	41858	42393	Minus
			Start: 1389475	Mycobacterium smegmatis JS623; Accession: YP_007290402
		regX3	End: 1390170
	RegX3(Mycobacterium)		Length: 696
Regulation			Strand: Minus
Regulation	Sigma H(Mycobacterium)	sigH	T. pyogenes strain TP6375 ; orf02026		Name of the strain	Query Coverage	E value	Per. ident	Start position	End position	Strand
			Contig: NZ_CP007519.1		NZ_PESV01000004.1 T. pyogenes Bu5 contig00004, WGS	0.73	3e-46	0.678	127563	128084	Minus
			Start: 2198737		UHHW01000002.1 T. pyogenes NCTC5224 genome assembly, contig: ERS1434927SCcontig000002, WGS	0.73	9e-41	0.6704	1600870	1601391	Minus
			End: 2199321	Mycobacterium sp. MCS
			Length: 585	YP_638547
			Strand: Plus
Adherence	SpaD-type pili	srtB	T. pyogenes strain TP6375 ; orf01634		Name of the strain	Query Coverage	E value	Per. ident	Start position	End position	Strand
			Contig: NZ_CP007519.1		T. pyogenes Bu5	NSS
			Start: 1752796		T. pyogenes UFV1	NSS
			End: 1753797	Corynebacterium pseudotuberculosis FRC41	JALQ01000092.1 T. pyogenesMS249 MS249_contig92, WGS	0.06	7e-05	0.7818	16389	16459	Minus
			Length: 1002	YP_003784275
			Strand: Plus
	ABC transporter	fagC	T. pyogenes strain TP1 ; orf01561		Name of the strain	Query Coverage	E value	Per. ident	Start position	End position	Strand
			Contig: NZ_CP033902.1		T. pyogenes TP4479	0.36	4e-27	0.7162	1264810	1265038	Plus
			Start: 1705348		T. pyogenes TP6375	0.37	4e-27	0.7162	1298342	1298570	Minus
			End: 1706058		T. pyogenes 2012CQ-ZSH	0.22	2e-26	0.8426	989006	989113	Plus
			Length: 711		T. pyogenesTP8	0.22	2e-26	0.8426	335941	336048	Plus
			Strand: Plus		T. pyogenes Arash114	0.36	1e-28	0.7205	1298280	1298508	Minus
					T. pyogenes TP2	0.36	4e-27	0.7162	595083	595311	Minus
					T. pyogenes TP-2849	0.36	4e-27	0.7162	1685558	1685786	Plus
					T. pyogenes TP4	0.36	8e-29	0.7205	191072	1191300	Minus
				Corynebacterium glutamicum ATCC 13032;	T. pyogenes jx18	0.36	3e-27	0.7162	1563768	1563996	Minus
				NP_599743	T. pyogenes TP3	0.36	3e-27	0.7162	2238943	2239171	Plus
					NZ_PESV01000001.1 T. pyogenes Bu5 contig00001, WGS	0.34	1e-27	0.7162	43394	43622	Plus
					JACHWO010000014.1 T. pyogenes DSM 20630 Ga0197550_14, WGS	0.28	1e-27	0.7162	25711	25939	Plus
					UHHW01000002.1 T. pyogenes NCTC5224 genome assembly, contig: ERS1434927SCcontig000002, WGS	0.36	1e-27	0.7162	240346	240574	Plus
					SPVE01000001.1 T. pyogenes SH01 scaffold1, WGS	0.38	3e-29	0.7205	47185	47413	Plus
					ML241295.1 T. pyogenes SH02 genomic scaffold scaffold1, WGS	0.38	1e-27	0.7162	325368	325596	Minus
					RWKU01000003.1 T. pyogenes SH03 contig3, WGS	0.38	1e-27	0.7162	438666	438894	Minus
					MVGS01000046.1 T. pyogenes UFV1 _contig_7_consensus_1, WGS	0.28	1e-27	0.7162	21363	21591	Minus
Iron uptake	ABC-type heme transporter	hmuV	T. pyogenes MS249; orf00213		Name of the strain	Query Coverage	E value	Per. ident	Start position	End position	Strand
			Contig: JALQ01000006.1		T. pyogenes TP4479	0.06	0.004	0.825	1153278	1153317	Plus
			Start: 15886		T. pyogenes 2012CQ-ZSH	0.06	0.004	0.825	879882	879921	Plus
			End: 16578		T. pyogenesTP8	0.06	0.004	0.825	229117	229156	Plus
			Length: 693		T. pyogenes TP6375	0.06	0.043	0.8182	1251466	1251507	Plus
			Strand: Minus		T. pyogenes TP-2849	0.06	0.004	0.825	1574026	1574065	Plus
					T. pyogenes TP2	0.06	0.043	0.8182	548208	548249	Plus
					T. pyogenes TP1	0.06	0.043	0.8182	1508638	1508679	Plus
				Corynebacterium diphtheriae NCTC 13129	T. pyogenes Arash114	0.06	0.043	0.8182	1251391	1251432	Plus
				NP_939002	T. pyogenes jx18	0.06	0.003	0.825	1717374	1717413	Minus
					T. pyogenes TP4	0.06	0.003	0.825	1306890	1306929	Minus
					T. pyogenes TP3	0.06	0.003	0.825	2127411	2127450	Plus
					NZ_PESV01000005.1 T. pyogenes Bu5 contig00005, WGS	0.04	0.01	0.8	66607	66646	Minus
					JACHWO010000020.1 T. pyogenes strain DSM 20630 Ga0197550_20, WGS	0.05	0.011	81.4	9369	9411	Minus
					UHHW01000002.1 T. pyogenes NCTC5224 genome assembly, contig: ERS1434927SCcontig000002, WGS	0.06	0.0009	0.825	117716	117755	Plus
					SPVE01000006.1 T. pyogenes SH01 scaffold6, WGS	0.04	0.0009	0.825	128616	128655	Plus
					ML241297.1 T. pyogenes SH02 genomic scaffold scaffold3, WGS	0.04	0.001	0.825	259612	259651	Plus
					RWKU01000008.1 T. pyogenes SH03 contig8, WGS	0.05	0.0002	0.8372	61668	61710	Plus
					MVGS01000044.1 T. pyogenes UFV1 _contig_7_consensus_3, WGS	0.05	0.011	0.8182	9320	9361	Plus
	Ciu iron uptake and siderophore biosynthesis system		T. pyogenes strain TP6375; orf01219		Name of the strain	Query Coverage	E value	Per. ident	Start position	End position	Strand
			Contig: NZ_CP007519.1		NZ_PESV01000001.1 T. pyogenes Bu5 contig00001, WGS	0.96	3e-91	0.7452	40260	40989	Plus
			Start: 1300956
			End: 1301804
Iron uptake		ciuA	Length: 849
			Strand: Minus
				Corynebacterium diphtheriae NCTC 13129; DIP0582 (NP_938958)
			T. pyogenes strain TP6375; orf01218		Name of the strain	Query Coverage	E value	Per. ident	Start position	End position	Strand
			Contig: NZ_CP007519.1		NZ_PESV01000001.1 T. pyogenes Bu5 contig00001, WGS	0.54	5e-33	0.6777	41174	41564	Plus
	Ciu iron uptake and siderophore biosynthesis system		Start: 1299964	Corynebacterium pseudotuberculosis FRC41; YP_003783389
			End: 1300872
			Length: 909
Iron uptake		ciuB	Strand: Minus
			T. pyogenes strain TP6375; orf01945		Name of the strain	Query Coverage	E value	Per. ident	Start position	End position	Strand
			Contig: NZ_CP007519.1		NZ_PESV01000004.1 T. pyogenes Bu5 contig00004, WGS	0.48	2e-18	0.6531	214544	214957	Minus
			Start: 2110788		CHWO010000007.1 T. pyogenes DSM 20630 Ga0197550_07, WGS	NSS
Lipid and fatty acid metabolism	Panthenate synthesis(Mycobacterium)	panC	End: 2111627	Mycobacterium gilvum Spyr1; YP_004079123
			Length: 840
			Strand: Plus
Lipid and fatty acid metabolism	Panthenate synthesis(Mycobacterium)	panD	T. pyogenes strain TP6375; orf01946		Name of the strain	Query Coverage	E value	Per. ident	Start position	End position	Strand
			Contig: NZ_CP007519.1		NZ_PESV01000004.1 T. pyogenes Bu5 contig00004, WGS	0.64	1e-30	0.75	214026	214235	Minus
			Start: 2111639		JACHWO010000007.1 T. pyogenes DSM 20630 Ga0197550_07, WGS	0.07	0.005	0.8667	61345	61374	Minus
			End: 2112055
			Length: 417	Mycobacterium gilvum PYR-GCK; YP_001132695
			Strand: Plus
Phagosome arresting	Nucleoside diphosphate kinase(Mycobacterium)	ndk	T. pyogenes strain TP6375; orf00418		Name of the strain	Query Coverage	E value	Per. ident	Start position	End position	Strand
			Contig: NZ_CP007519.1		T. pyogenes Bu5	NSS
			Start: 445851
			End: 446264	Mycobacterium canettii CIPT; 140070017;
			Length: 414	YP_007269154
			Strand: Minus
Immune evasion	Exopolysaccharide(Haemophilus)	pgi			Name of the strain	Query Coverage	E value	Per. ident	Start position	End position	Strand
			T. pyogenes strain UFV1 ; orf00141		T. pyogenes 2012CQ-ZSH	0.05	4e-12	0.7753	1378157	1378245	Plus
			Contig: MVGS01000029.1		T. pyogenesTP8	0.05	4e-12	0.7753	750727	750815	Plus
			Start: 40		T. pyogenes TP6375	0.05	2e-10	0.764	891986	892074	Minus
			End: 1692		T. pyogenes TP2	0.1	4e-12	0.7753	209037	209125	Minus
			Length: 1653		T. pyogenes Arash114	0.05	4e-12	0.7753	891887	891975	Minus
			Strand: Minus	Haemophilus somnus 129PT; YP_719149	T. pyogenes strain TP1	0.05	2e-10	0.764	1155931	1156019	Minus
					T. pyogenes TP4479	NSS
					T. pyogenes TP-2849
					T. pyogenes TP3
					T. pyogenes TP4
					T. pyogenes jx18
					NZ_PESV01000001.1 T. pyogenes Bu5 contig00001, WGS	0.1	4e-11	0.764	443746	443834	Plus
Nutritional virulence	Pyrimidine biosynthesis(Francisella)		T. pyogenes strain UFV1; orf00564		Name of the strain	Query Coverage	E value	Per. ident	Start position	End position	Strand
			Contig: MVGS01000004.1		T. pyogenes TP6375	1	0	1	129719	132985	Minus
			Start: 67567		T. pyogenes 2012CQ-ZSH	0.89	0	0.9817	1817370	1819997	Minus
			End: 70833		T. pyogenesTP8	0.89	0	0.9814	1207776	1210403	Minus
			Length: 3267		T. pyogenes TP4479	0.38	0	0.9811	2136733	2137790	Minus
			Strand: Minus		T. pyogenes jx18	0.89	0	0.9836	679183	681810	Plus
				Francisella cf. novicida Fx1;	T. pyogenes TP4	0.38	0	0.9811	272475	273532	Plus
				YP_005824934.1	T. pyogenes TP3	0.38	0	0.9811	726210	727267	Minus
					T. pyogenes Arash114	1	0	0.9991	129712	132978	Minus
					T. pyogenes TP2	1	0	0.9954	2027353	2030619	Plus
					T. pyogenes TP1	1	0	0.9945	722033	725299	Plus
					T. pyogenes TP-2849	0.38	0	0.9811	172807	173864	Minus
					JACHWO010000001.1 T. pyogenes DSM 20630 Ga0197550_01, WGS	0.89	0	0.9795	597607	600238	Minus
					UHHW01000002.1 T. pyogenes NCTC5224 genome assembly, contig: ERS1434927SCcontig000002, WGS	0.89	0	0.9795	1066208	1068839	Minus
					SPVE01000007.1 T. pyogenes SH01 scaffold7, WGS	0.89	0	0.9886	127282	129911	Minus
					ML241298.1 T. pyogenes SH02 genomic scaffold scaffold5, WGS	0.38	0	0.9811	126328	127555	Minus
					RWKU01000001.1 T. pyogenes SH03 contig1, WGS	0.38	0	0.9811	127244	128471	Minus
					NZ_PESV01000002.1 T. pyogenes Bu5 contig00002, WGS	1	0	0.9868	376352	379618	Plus
