# Supplementary material for: Comparative Genome Analysis of 19 Trueperella pyogenes Strains Originating from Different Animal Species Reveal a Genetically Diverse Open Pan-Genome
Source: Antibiotics (Basel). 2022 Dec 24;12(1):24. doi: 10.3390/antibiotics12010024 (PMC9854608; doi:10.3390/antibiotics12010024)
Supplement: Supplementary file 1 [file antibiotics-12-00024-s001.zip › Table S8a-s Genomic Islands identified by Island Viewer.xlsx]

## Sheet: S8 a-s
Supplementary Table 8(a) The Table lists genomic islands identified in the investigated T.pyogens2012CQ-ZSH genome by Islandviewer 4 tool.
S.No	Start	End	Size	GI Prediction Method	External Annotations
1	307810	313977	6167	Predicted by at least one method
2	462342	469234	6892	Predicted by at least one method
3	516339	520391	4052	Predicted by at least one method
4	578924	587167	8243	Predicted by at least one method
5	646074	671288	25214	Predicted by at least one method	Resistance gene
6	714022	721524	7502	Predicted by at least one method
7	745986	755672	9686	Predicted by at least one method
8	900861	909083	8222	Predicted by at least one method
9	979888	984258	4370	Predicted by at least one method
10	1358168	1363047	4879	Predicted by at least one method
11	1752214	1757069	4855	Predicted by at least one method
12	2153624	2199620	45996	Predicted by at least one method
13	2155395	2160881	5486	Predicted by at least one method
14	2186335	2191245	4910	Predicted by at least one method
Supplementary Table 8 (b) The Table lists genomic islands identified in the T.pyogenesArash114 genome by Islandviewer 4 tool.
S.No	Start	End	Size	External Annotations
1	259452	304986	45534
2	261026	265265	4239
3	292879	298525	5646
4	640169	722262	82093
5	906799	918901	12102	Resistance gene
6	1128151	1137517	9366
7	1234476	1244534	10058
8	1235393	1246147	10754
9	1377123	1381611	4488
10	1529130	1539683	10553
11	1560912	1566410	5498
12	1949414	1964822	15408
13	1981647	1993387	11740
14	2027613	2035250	7637
15	2043108	2048679	5571
16	2058557	2065221	6664
17	2200594	2205774	5180
Supplementary Table 8 (c) The Table lists genomic islands identified in the investigated T.pyogenesjx18 genome by Islandviewer 4 tool.
S.No	Start	End	Size	External Annotations
1	1147	9130	7983
2	1014279	1023807	9528
3	1114380	1119962	5582
4	1140153	1146524	6371
5	1179638	1187285	7647
6	1401585	1411316	9731
7	1504792	1509956	5164
8	1633348	1667005	33657
9	1683775	1688350	4575
10	1706126	1714338	8212
11	1836397	1846951	10554
12	1869234	1876775	7541
13	1967655	1973789	6134
14	1994453	2002698	8245
15	2021518	2076843	55325
16	2024144	2030416	6272
17	2061210	2069322	8112
18	2159146	2164902	5756
19	2314336	2329870	15534
20	2353959	2358592	4633
21	2400715	2406287	5572
Supplementary Table 8(d) The Table lists genomic islands identified in the investigated T.pyogenesTP1 genome by Islandviewer 4 tool.
S.No	Start	End	Size	External Annotations
1	24852	31462	6610
2	44520	54273	9753
3	188284	194878	6594
4	394934	402005	7071
5	589654	594008	4354
6	1058785	1065623	6838
7	1171489	1181520	10031	Resistance gene
8	1392122	1401038	8916
9	1447157	1452631	5474
10	1638733	1645563	6830
11	1769317	1774826	5509
12	1813916	1819414	5498
13	1939049	1947294	8245
14	2206275	2213083	6808
15	2249377	2315331	65954	Resistance gene,Pathogen Associated gene
16	2284254	2289417	5163	Resistance gene
17	2293002	2299272	6270
Supplementary Table 8 (e) The Table lists genomic islands identified in the investigated T.pyogensTP2 genome by Islandviewer 4 tool.
S.No	Start	End	Size	GI Prediction Method
1	432684	441600	8916	Predicted by at least one method
2	487554	492489	4935	Predicted by at least one method
3	596705	614276	17571	Predicted by at least one method
4	600059	606357	6298	Predicted by at least one method
5	652195	656201	4006	Predicted by at least one method
6	690043	694531	4488	Predicted by at least one method
7	839657	849651	9994	Predicted by at least one method
8	873850	879348	5498	Predicted by at least one method
9	998891	1007136	8245	Predicted by at least one method
10	1064778	1068848	4070	Predicted by at least one method
11	1090080	1110624	20544	Predicted by at least one method
12	1273088	1279896	6808	Predicted by at least one method
13	1313874	1330863	16989	Predicted by at least one method
14	1340765	1349202	8437	Predicted by at least one method
15	1478681	1486302	7621	Predicted by at least one method
16	1851687	1899775	48088	Predicted by at least one method
Supplementary Table 8 (f) The Table lists genomic islands identified in the T.pyogenesTP3 genome by Islandviewer 4 tool.
S.No	Start	End	Size	GI Prediction Method
1	12357	21274	8917	Predicted by at least one method
2	232319	275765	43446	Predicted by at least one method
3	255209	266816	11607	Predicted by at least one method
4	295931	301514	5583	Predicted by at least one method
5	782606	787225	4619	Predicted by at least one method
6	1407383	1414173	6790	Predicted by at least one method
7	1427522	1434013	6491	Predicted by at least one method
8	1427522	1437311	9789	Predicted by at least one method
9	1473840	1479640	5800	Predicted by at least one method
10	1502121	1517740	15619	Predicted by at least one method
11	1561410	1621081	59671	Predicted by at least one method
12	1565439	1572660	7221	Predicted by at least one method
13	1607771	1612511	4740	Predicted by at least one method
14	1613437	1619087	5650	Predicted by at least one method
15	1842309	1850554	8245	Predicted by at least one method
16	1968188	1975729	7541	Predicted by at least one method
17	1989994	1995241	5247	Predicted by at least one method
18	1998012	2008566	10554	Predicted by at least one method
19	2147783	2154613	6830	Predicted by at least one method
Supplementary Table 8(g) The Table enlists genomic islands identified in the investigated T.pyogenesTP4 genome by Islandviewer 4 tool.
S.No	Start	End	Size	GI Prediction Method
1	212517	217136	4619	Predicted by at least one method
2	605661	615189	9528	Predicted by at least one method
3	605661	654018	48357	Predicted by at least one method
4	618102	625925	7823	Predicted by at least one method
5	740871	746453	5582	Predicted by at least one method
6	766644	770789	4145	Predicted by at least one method
7	766644	820743	54099	Predicted by at least one method
8	773808	785415	11607	Predicted by at least one method
9	793537	803696	10159	Predicted by at least one method
10	1028972	1038703	9731	Predicted by at least one method
11	1132175	1137337	5162	Predicted by at least one method
12	1273201	1277690	4489	Predicted by at least one method
13	1296937	1303245	6308	Predicted by at least one method
14	1426645	1437199	10554	Predicted by at least one method
15	1459439	1464937	5498	Predicted by at least one method
16	1584659	1592902	8243	Predicted by at least one method
17	1707561	1757334	49773	Predicted by at least one method
18	1712459	1717203	4744	Predicted by at least one method
19	1742259	1747169	4910	Predicted by at least one method
20	1950339	1956160	5821	Predicted by at least one method
21	1988944	1997939	8995	Predicted by at least one method
22	2013381	2019323	5942	Predicted by at least one method
Supplementary Table 8(h) The Table lists genomic islands identified in the investigated T.pyogenesTP8 genome by Islandviewer 4 tool.
S.No	Start	End	Size
1	60555	68057	7502
2	90207	99710	9503
3	119545	124151	4606
4	121017	127898	6881
5	499369	508291	8922
6	723624	735616	11992
7	838855	843440	4585
8	839237	882800	43563
9	1863818	1870140	6322
10	1912887	1917104	4217
11	1941376	1956734	15358
12	2205069	2213312	8243
Supplementary Table8 (i) The Table lists genomic islands identified in the T.pyogenesTP-2849 genome by Islandviewer 4 tool.
S.No	Start	End	Size	GI Prediction Method
1	229203	233822	4619	Predicted by at least one method
2	853993	860783	6790	Predicted by at least one method
3	874130	880624	6494	Predicted by at least one method
4	874130	883922	9792	Predicted by at least one method
5	920452	926252	5800	Predicted by at least one method
6	948733	964352	15619	Predicted by at least one method
7	1008022	1067693	59671	Predicted by at least one method
8	1012051	1019272	7221	Predicted by at least one method
9	1054383	1059123	4740	Predicted by at least one method
10	1060049	1065699	5650	Predicted by at least one method
11	1288923	1297168	8245	Predicted by at least one method
12	1414802	1422343	7541	Predicted by at least one method
13	1436608	1441349	4741	Predicted by at least one method
14	1444055	1455180	11125	Predicted by at least one method
15	1594398	1601228	6830	Predicted by at least one method
16	1843172	1852539	9367	Predicted by at least one method
17	2063584	2107030	43446	Predicted by at least one method
18	2086474	2098081	11607	Predicted by at least one method
19	2127196	2132779	5583	Predicted by at least one method
Supplementary Table 8(j) The Table lists genomic islands identified in the T.pyogenesTP-6375 genome by Islandviewer 4 tool.
S.No	Start	End	Size	External Annotations
1	639475	718056	78581
2	661610	666146	4536
3	906899	916932	10033	Resistance gene
4	1128243	1137609	9366
5	1240148	1244623	4475
6	1377193	1381684	4491
7	1529228	1539246	10018
8	1820113	1824219	4106
9	1949511	1964835	15324
10	1981712	1993428	11716
11	2023157	2035349	12192
12	2043207	2048778	5571
13	2058658	2065238	6580
14	2199318	2205246	5928
Supplementary Table 8 (k) The Table lists genomic islands identified in the T.pyogenesTP4479 genome by Islandviewer 4 tool.
S.No	Start	End	Size
1	435669	442459	6790
2	455806	462300	6494
3	455806	465598	9792
4	499704	505504	5800
5	527985	543604	15619
6	587274	646945	59671
7	591303	598524	7221
8	633635	638375	4740
9	639301	644951	5650
10	868175	876420	8245
11	994054	1001595	7541
12	1015860	1020601	4741
13	1023307	1034432	11125
14	1173650	1180480	6830
15	1422424	1431791	9367
16	1642836	1686282	43446
17	1665726	1677333	11607
18	1706448	1712031	5583
19	2193129	2197748	4619
Supplementary Table8 (l) The Table enlists genomic islands identified in the investigated T.pyogenesBu5 genome by Islandviewer 4 tool.
S.No	Start	End	Size	GI Prediction Method
1	835701	841092	5391	Predicted by at least one method
2	1050426	1059678	9252	Predicted by at least one method
3	1099066	1116291	17225	Predicted by at least one method
4	1312123	1336050	23927	Predicted by at least one method
5	1322611	1330335	7724	Predicted by at least one method
6	1479436	1484938	5502	Predicted by at least one method
7	1528812	1534566	5754	Predicted by at least one method
8	1604595	1612845	8250	Predicted by at least one method
9	1683384	1703577	20193	Predicted by at least one method
10	1721424	1725534	4110	Predicted by at least one method
11	1852169	1867795	15626	Predicted by at least one method
12	1884389	1896503	12114	Predicted by at least one method
13	1938793	1944365	5572	Predicted by at least one method
14	1954018	1961605	7587	Predicted by at least one method
Supplementary Table 8 (m) The Table genomic islands identified in the T.pyogenesMS249 genome by Islandviewer 4 tool.
S.No	Start	End	Size	GI Prediction Method
1	232593	247011	14418	Predicted by at least one method
2	236252	244287	8035	Predicted by at least one method
3	271107	275975	4868	Predicted by at least one method
4	1015128	1026185	11057	Predicted by at least one method
5	1134575	1156074	21499	Predicted by at least one method
6	1136425	1146339	9914	Predicted by at least one method
7	1430478	1434863	4385	Predicted by at least one method
8	1430478	1437351	6873	Predicted by at least one method
9	1628931	1637213	8282	Predicted by at least one method
10	1782216	1791902	9686	Predicted by at least one method
11	1826771	1835266	8495	Predicted by at least one method
12	1875169	1885281	10112	Predicted by at least one method
13	1905943	1918376	12433	Predicted by at least one method
14	1969908	1977790	7882	Predicted by at least one method
15	1981267	1985600	4333	Predicted by at least one method
16	2064488	2071173	6685	Predicted by at least one method
17	2249231	2257281	8050	Predicted by at least one method
18	2249231	2258668	9437	Predicted by at least one method
19	2286046	2294570	8524	Predicted by at least one method
20	2287209	2294955	7746	Predicted by at least one method
21	2307803	2334354	26551	Predicted by at least one method
22	2309178	2338088	28910	Predicted by at least one method
Supplementary Table 8 (n) The Table enlists genomic islands identified in the investigated T.pyogenes genome by Islandviewer 4 tool.
S.No	Start	End	Size	GI Prediction Method
1	583581	595717	12136	Predicted by at least one method
2	896306	900998	4692	Predicted by at least one method
3	1233494	1242860	9366	Predicted by at least one method
4	1337798	1343276	5478	Predicted by at least one method
5	1479470	1483514	4044	Predicted by at least one method
6	1609088	1618494	9406	Predicted by at least one method
7	1632758	1643290	10532	Predicted by at least one method
8	1665820	1671318	5498	Predicted by at least one method
9	1716761	1722831	6070	Predicted by at least one method
10	1910447	1914960	4513	Predicted by at least one method
11	2047034	2063300	16266	Predicted by at least one method
12	2080195	2091893	11698	Predicted by at least one method
13	2122813	2174224	51411	Predicted by at least one method
14	2123591	2132078	8487	Predicted by at least one method
15	2136968	2145507	8539	Predicted by at least one method
16	2155387	2174224	18837	Predicted by at least one method
Supplementary Table 8(o) The Table enlists genomic islands identified in the T.pyogenesNCTC5224 genome by Islandviewer 4 tool.
S.No	Start	End	Size	GI Prediction Method
1	115708	138368	22660	Predicted by at least one method
2	120791	127708	6917	Predicted by at least one method
3	147728	154557	6829	Predicted by at least one method
4	189859	194244	4385	Predicted by at least one method
5	231230	235610	4380	Predicted by at least one method
6	292218	299091	6873	Predicted by at least one method
7	597715	601778	4063	Predicted by at least one method
8	725376	735365	9989	Predicted by at least one method
9	725376	735365	9989	Predicted by at least one method
10	932101	938186	6085	Predicted by at least one method
11	1756237	1770466	14229	Predicted by at least one method
12	1756237	1768288	12051	Predicted by at least one method
13	1800189	1806348	6159	Predicted by at least one method
14	1828894	1844738	15844	Predicted by at least one method
15	1986923	1993409	6486	Predicted by at least one method
16	2104666	2112909	8243	Predicted by at least one method
17	2170453	2193636	23183	Predicted by at least one method
18	2232823	2240364	7541	Predicted by at least one method
19	2253922	2259168	5246	Predicted by at least one method
Supplementary Table 8 (p) The Table lists genomic islands in the investigated T.pyogenes SH02 genome by Islandviewer 4 tool.
S.No	Start	End	Size	GI Prediction Method
1	637	6209	5572	Predicted by at least one method
2	296170	311434	15264	Predicted by at least one method
3	630632	635576	4944	Predicted by at least one method
4	1136911	1149245	12334	Predicted by at least one method
5	1138574	1187647	49073	Predicted by at least one method
6	1149645	1155816	6171	Predicted by at least one method
7	1161336	1170404	9068	Predicted by at least one method
8	1171307	1177971	6664	Predicted by at least one method
9	1395061	1404425	9364	Predicted by at least one method
10	1498280	1503442	5162	Predicted by at least one method
11	1562387	1566851	4464	Predicted by at least one method
12	1603916	1608055	4139	Predicted by at least one method
13	1679904	1687360	7456	Predicted by at least one method
14	1761047	1769290	8243	Predicted by at least one method
15	1792623	1843253	50630	Predicted by at least one method
16	1812970	1825633	12663	Predicted by at least one method
17	1918430	1948205	29775	Predicted by at least one method
18	1936045	1944674	8629	Predicted by at least one method
19	2131942	2136818	4876	Predicted by at least one method
20	2307283	2326415	19132	Predicted by at least one method
21	2310257	2317036	6779	Predicted by at least one method
22	2334420	2341171	6751	Predicted by at least one method
23	2361284	2413988	52704	Predicted by at least one method
24	2371726	2392734	21008	Predicted by at least one method
25	2409317	2414309	4992	Predicted by at least one method
Supplementary Table 8 (q) The Table lists genomic islands identified in the investigated T.pyogenes SH03 genome by Islandviewer 4 tool.
S.No	Start	End	Size	GI Prediction Method
1	643	6215	5572	Predicted by at least one method
2	632622	637566	4944	Predicted by at least one method
3	1143254	1155588	12334	Predicted by at least one method
4	1144917	1196168	51251	Predicted by at least one method
5	1155988	1162159	6171	Predicted by at least one method
6	1167679	1178335	10656	Predicted by at least one method
7	1179238	1186492	7254	Predicted by at least one method
8	1402456	1411820	9364	Predicted by at least one method
9	1505675	1510837	5162	Predicted by at least one method
10	1569718	1574182	4464	Predicted by at least one method
11	1652858	1657433	4575	Predicted by at least one method
12	1944589	1952832	8243	Predicted by at least one method
13	1976215	2027749	51534	Predicted by at least one method
14	2001088	2010242	9154	Predicted by at least one method
15	2102966	2132750	29784	Predicted by at least one method
16	2120581	2129219	8638	Predicted by at least one method
17	2318392	2323268	4876	Predicted by at least one method
18	2370732	2384951	14219	Predicted by at least one method
Supplementary Table 8 (r) The Table enlists genomic islands identified in theT.pyogenes SH01 genome by Islandviewer 4 tool.
S.No	Start	End	Size	GI Prediction Method
1	643	6215	5572	Predicted by at least one method
2	241284	250565	9281	Predicted by at least one method
3	638945	643564	4619	Predicted by at least one method
4	1141291	1145436	4145	Predicted by at least one method
5	1142954	1193784	50830	Predicted by at least one method
6	1148455	1153491	5036	Predicted by at least one method
7	1153891	1160062	6171	Predicted by at least one method
8	1165528	1174650	9122	Predicted by at least one method
9	1178661	1184108	5447	Predicted by at least one method
10	1400065	1409431	9366	Predicted by at least one method
11	1503268	1508431	5163	Predicted by at least one method
12	1567312	1571776	4464	Predicted by at least one method
13	1608761	1615716	6955	Predicted by at least one method
14	1652297	1656786	4489	Predicted by at least one method
15	1793589	1805466	11877	Predicted by at least one method
16	1796323	1807560	11237	Predicted by at least one method
17	1886039	1894347	8308	Predicted by at least one method
18	1886039	1916637	30598	Predicted by at least one method
19	1895525	1899875	4350	Predicted by at least one method
20	1987971	1996214	8243	Predicted by at least one method
21	2094961	2102629	7668	Predicted by at least one method
22	2281414	2286290	4876	Predicted by at least one method
23	2339098	2370600	31502	Predicted by at least one method
24	2342411	2357038	14627	Predicted by at least one method
Supplementary Table 8 (s) The Table lists genomic islands identified in the T.pyogenes DSM20630 genome by PHASTER tool.
S.No	Start	End	Size	GI Prediction Method
1	932233	942222	9989	Predicted by at least one method
2	1059798	1075444	15646	Predicted by at least one method
3	1065820	1069832	4012	Predicted by at least one method
4	1379733	1385411	5678	Predicted by at least one method
5	1379733	1387024	7291	Predicted by at least one method
6	1439704	1447214	7510	Predicted by at least one method
7	1442054	1446434	4380	Predicted by at least one method
8	1486355	1490737	4382	Predicted by at least one method
9	1517958	1522525	4567	Predicted by at least one method
10	1533137	1558942	25805	Predicted by at least one method
11	1544807	1551724	6917	Predicted by at least one method
12	1688443	1695984	7541	Predicted by at least one method
13	1732172	1741091	8919	Predicted by at least one method
14	1762924	1767593	4669	Predicted by at least one method
15	1792614	1801612	8998	Predicted by at least one method
16	2095311	2110937	15626	Predicted by at least one method
17	2133483	2139642	6159	Predicted by at least one method
18	2168202	2182733	14531	Predicted by at least one method
19	2174380	2183594	9214	Predicted by at least one method
20	2196071	2204955	8884	Predicted by at least one method
