# Supplementary material for: Comparative Genome Analysis of 19 Trueperella pyogenes Strains Originating from Different Animal Species Reveal a Genetically Diverse Open Pan-Genome
Source: Antibiotics (Basel). 2022 Dec 24;12(1):24. doi: 10.3390/antibiotics12010024 (PMC9854608; doi:10.3390/antibiotics12010024)
Supplement: Supplementary file 1 [file antibiotics-12-00024-s001.zip › Table S9 Prophages identified in T. pyogenes strains by PHASTER.xlsx]

## Sheet: Sheet1
Supplementary Table 9 The Table lists prophages identified in the investigated T.pyogenes genomes by PHASTER tool.
S.No	Name of genome	Region	Region Length	Completeness	Score	# Total Proteins	Region Position	Most Common Phage	GC %
1	T. pyogenes 2012CQ-ZSH	1	10.9Kb	incomplete	50	10	2155950-2166948	PHAGE_Clostr_phiCT19406C_NC_029006(2)	0.6172
2	T. pyogenes Arash114	1	20.8Kb	questionable	70	15	664486-685291	PHAGE_Lactob_iA2_NC_028830(3)	0.5964
		2	17.5Kb	incomplete	10	24	693308-710813	PHAGE_Coryne_Adelaide_NC_048791(6)	0.5827
3	T. pyogenes jx18	1	18.3Kb	incomplete	50	22	1637384-1655732	PHAGE_Propio_E6_NC_041894(2)	0.5864
		2	11.2Kb	incomplete	20	16	2046068-2057305	PHAGE_Salmon_118970_sal3_NC_031940(2)	0.5626
		3	16.6Kb	incomplete	30	11	2054252-2070911	PHAGE_Lactob_PLE2_NC_031036(2)	0.557
4	T. pyogenes TP1	1	26.7Kb	incomplete	30	36	831-27593	PHAGE_Coryne_Dina_NC_048787(6)	0.5988
		2	33Kb	incomplete	40	34	2257919-2290975	PHAGE_Lactob_PLE2_NC_031036(3)	0.6039
		3	27.4Kb	incomplete	10	27	2290975-2318463	PHAGE_Coryne_Adelaide_NC_048791(6)	0.5982
		4	28.9Kb	intact	100	34	2302469-2331447	PHAGE_Staphy_SPbeta_like_NC_029119(2)	0.5913
5	T. pyogenes TP2	1	13.8Kb	incomplete	30	13	602665-616542	PHAGE_Bacill_Gamma_NC_007458(2)	0.522
6	T. pyogenes TP3	1	36.8Kb	incomplete	30	26	1576561-1613367	PHAGE_Salmon_118970_sal3_NC_031940(2)	0.5653
		2	13Kb	incomplete	40	13	1603847-1616853	PHAGE_Bacill_Fah_NC_007814(2)	0.5522
7	T. pyogenes TP4	1	39.3Kb	questionable	90	45	613373-652732	PHAGE_Mycoba_Gaia_NC_026590(2)	0.5883
		2	9.1Kb	incomplete	50	9	1713747-1722872	PHAGE_Clostr_phiCT19406C_NC_029006(2)	0.6339
8	T. pyogenes TP8	1	47.7Kb	incomplete	50	54	830348-878072	PHAGE_Coryne_Stiles_NC_048789(8)	0.5758
9	T. pyogenes TP-2849	1	36.8Kb	incomplete	30	26	1023173-1059979	PHAGE_Salmon_118970_sal3_NC_031940(2)	0.5653
		2	13Kb	incomplete	40	13	1050459-1063465	PHAGE_Bacill_Gamma_NC_007458(2)	0.5522
10	T. pyogenes TP4479	1	36.8Kb	incomplete	30	26	602425-639231	PHAGE_Salmon_118970_sal3_NC_031940(2)	0.5653
		2	13Kb	incomplete	40	13	629711-642717	PHAGE_Bacill_Gamma_NC_007458(2)	0.5522
11	T. pyogenes TP6375	1	34.9Kb	intact	110	34	663431-698410	PHAGE_Lactob_iA2_NC_028830(3)	0.5936
		2	17.5Kb	incomplete	10	24	693381-710886	PHAGE_Coryne_Dina_NC_048787(6)	0.5859
12	T. Pyogenes DSM 20630, (JACHWO010000010.1,)Ga0197550_10,(WGS)	1	5.2Kb	incomplete	10	12	327-5557	PHAGE_Coryne_Adelaide_NC_048791(4)	0.5974
13	T.pyogenes MS249, (ALQ01000012.1,)MS249_contig12,(WGS)	1	9.6Kb	incomplete	20	8	26612-36276	PHAGE_Synech_S_CAM8_NC_021530(1)	0.6449
14	T.pyogenes SH01 (SPVE01000014.1,)scaffold14, (WGS)	1	14.7Kb	incomplete	10	16	6445-21188	PHAGE_Coryne_Adelaide_NC_048791(6)	0.5494
15	T.pyogenes SH02 (ML241301.1) genomic,scaffold,scaffold16,(WGS)	1	12.7Kb	incomplete	50	12	8609-21325	PHAGE_Lactob_iA2_NC_028830(2)	0.6098
16	T.pyogenes SH03 (RWKU01000024.1,) contig24, (WGS)	1	12.6Kb	incomplete	50	12	607-13210	PHAGE_Lactob_iA2_NC_028830(3)	0.6098
17	T.pyogenes (MVGS01000030.1,)UFV1,_contig_1_consensus_9,(WGS)	1	9.9Kb	incomplete	20	8	12388-22381	PHAGE_Prochl_P_SSM2_NC_006883(2)	0.6438
18	T. pyogenes NCTC5224,(UHHW01000002.1,),ERS1434927SCcontig000002,(WGS)	1	5.2Kb	incomplete	10	12	2078023-2083253	PHAGE_Coryne_Lederberg_NC_048790(4)	0.5974
19	T. Pyogenes Bu5 (NZ_PESV01000001.1,)contig00001, (WGS)	1	9.6Kb	incomplete	20	8	403037-412730	PHAGE_Prochl_P_SSM2_NC_006883(2)	0.6445
		2	8Kb	incomplete	10	9	731521-739570	PHAGE_Brevib_Jimmer2_NC_041976(1)	0.5781
