# Supplementary material for: Comparative Genome Analysis of 19 Trueperella pyogenes Strains Originating from Different Animal Species Reveal a Genetically Diverse Open Pan-Genome
Source: Antibiotics (Basel). 2022 Dec 24;12(1):24. doi: 10.3390/antibiotics12010024 (PMC9854608; doi:10.3390/antibiotics12010024)
Supplement: Supplementary file 1 [file antibiotics-12-00024-s001.zip › Table S10 AMR genes identified by CARD.xlsx]

## Sheet: CARD results
Supplementary Table 10 The Table lists antibiotic resistance genes identified in the investigated T.pyogenes genomes by CARD database.
S.No	Name of the genome	RGI Criteria	ARO Term	SNP	Detection Criteria	AMR Gene family	Drug Class	Resistance Mechanism	% Identity of Matching Region	% Length of Reference Sequence
1	T. pyogenens 2012CQ-ZSH	Strict	ErmX		protein homolog model	Erm 23S ribosomal RNA methyltransferase	macrolide antibiotic, lincosamide antibiotic, streptogramin antibiotic	antibiotic target alteration	88.38	100
2	T. pyogenes Arash114	Strict	tet(W/N/W)		protein homolog model	tetracycline-resistant ribosomal protection protein	tetracycline antibiotic	antibiotic target protection	92.79	100
3	T. pyogenes jx18	Strict	tet(W/N/W)		protein homolog model	tetracycline-resistant ribosomal protection protein	tetracycline antibiotic	antibiotic target protection	95.1	89.36
		Strict	ErmX		protein homolog model	Erm 23S ribosomal RNA methyltransferase	macrolide antibiotic, lincosamide antibiotic, streptogramin antibiotic	antibiotic target alteration	88.38	100
4	T. pyogenes TP1	Perfect	ANT(2'')-Ia		protein homolog model	ANT(2'')	aminoglycoside antibiotic	antibiotic inactivation	100	100
		Perfect	qacEdelta1		protein homolog model	major facilitator superfamily (MFS) antibiotic efflux pump	acridine dye	antibiotic efflux	100	100
		Strict	tet(W/N/W)		protein homolog model	tetracycline-resistant ribosomal protection protein	tetracycline antibiotic	antibiotic target protection	92.79	100
		Strict	aadA		protein homolog model	ANT(3'')	aminoglycoside antibiotic	antibiotic inactivation	99.61	98.48
		Strict	sul1		protein homolog model	sulfonamide resistant sul	sulfonamide antibiotic	antibiotic target replacement	99.64	100
5	T. pyogenes TP2	Strict	Mycobacterium tuberculosis rpsL mutations conferring resistance to Streptomycin	K88R	protein variant model	antibiotic-resistant rpsL	aminoglycoside antibiotic	antibiotic target alteration	83.74	100
6	T. pyogenes TP3	Strict	tet(W/N/W)		protein homolog model	tetracycline-resistant ribosomal protection protein	tetracycline antibiotic	antibiotic target protection	95.14	100
		Strict	tet(33)		protein homolog model	major facilitator superfamily (MFS) antibiotic efflux pump	tetracycline antibiotic	antibiotic efflux	99.75	102.95
		Strict	ErmX		protein homolog model	Erm 23S ribosomal RNA methyltransferase	macrolide antibiotic, lincosamide antibiotic, streptogramin antibiotic	antibiotic target alteration	90.14	100
7	T. pyogenes TP4	Strict	tet(W/N/W)		protein homolog model	tetracycline-resistant ribosomal protection protein	tetracycline antibiotic	antibiotic target protection	94.83	100
		Strict	tet(W/N/W)		protein homolog model	tetracycline-resistant ribosomal protection protein	tetracycline antibiotic	antibiotic target protection	94.83	100
		Strict	ErmX		protein homolog model	Erm 23S ribosomal RNA methyltransferase	macrolide antibiotic, lincosamide antibiotic, streptogramin antibiotic	antibiotic target alteration	87.6	104.23
		Strict	ErmX		protein homolog model	Erm 23S ribosomal RNA methyltransferase	macrolide antibiotic, lincosamide antibiotic, streptogramin antibiotic	antibiotic target alteration	88.38	100
8	T. pyogenes TP8	Strict	Mycobacterium tuberculosis rpsL mutations conferring resistance to Streptomycin	K88R	protein variant model	antibiotic-resistant rpsL	aminoglycoside antibiotic	antibiotic target alteration	83.74	100
9	T. pyogenes TP-2849	Strict	tet(33)		protein homolog model	major facilitator superfamily (MFS) antibiotic efflux pump	tetracycline antibiotic	antibiotic efflux	99.75	102.95
		Strict	ErmX		protein homolog model	Erm 23S ribosomal RNA methyltransferase	macrolide antibiotic, lincosamide antibiotic, streptogramin antibiotic	antibiotic target alteration	90.14	100
		Strict	tet(W/N/W)		protein homolog model	tetracycline-resistant ribosomal protection protein	tetracycline antibiotic	antibiotic target protection	95.14	100
10	T. pyogenes TP4479	Strict	tet(33)		protein homolog model	major facilitator superfamily (MFS) antibiotic efflux pump	tetracycline antibiotic	antibiotic efflux	99.75	102.95
		Strict	ErmX		protein homolog model	Erm 23S ribosomal RNA methyltransferase	macrolide antibiotic, lincosamide antibiotic, streptogramin antibiotic	antibiotic target alteration	90.14	100
		Strict	tet(W/N/W)		protein homolog model	tetracycline-resistant ribosomal protection protein	tetracycline antibiotic	antibiotic target protection	95.14	100
11	T. pyogenes TP6375	Strict	tet(W/N/W)		protein homolog model	tetracycline-resistant ribosomal protection protein	tetracycline antibiotic	antibiotic target protection	92.79	100
12	T. pyogenes Bu5	-	-		-	-	-	-
13	T. pyogenes DSM 20630	-
14	T. pyogenes SH02	Perfect	ANT(2'')-Ia		protein homolog model	ANT(2'')	aminoglycoside antibiotic	antibiotic inactivation	100	109.6
		Perfect	qacEdelta1		protein homolog model	major facilitator superfamily (MFS) antibiotic efflux pump	acridine dye	antibiotic efflux	100	100
		Strict	tet(W/N/W)		protein homolog model	tetracycline-resistant ribosomal protection protein	tetracycline antibiotic	antibiotic target protection	95.61	100
		Strict	tet(Z)		protein homolog model	major facilitator superfamily (MFS) antibiotic efflux pump	tetracycline antibiotic	antibiotic efflux	99.74	106.51
		Strict	aadA		protein homolog model	ANT(3'')	aminoglycoside antibiotic	antibiotic inactivation	99.62	100
		Strict	cmlA6		protein homolog model	major facilitator superfamily (MFS) antibiotic efflux pump	phenicol antibiotic	antibiotic efflux	99.76	100
15	T. pyogenes SH01	Perfect	aadA		protein homolog model	ANT(3'')	aminoglycoside antibiotic	antibiotic inactivation	100	106.46
		Strict	tet(W/N/W)		protein homolog model	tetracycline-resistant ribosomal protection protein	tetracycline antibiotic	antibiotic target protection	94.83	100
		Strict	tet(Z)		protein homolog model	major facilitator superfamily (MFS) antibiotic efflux pump	tetracycline antibiotic	antibiotic efflux	99.74	106.51
		Strict	sul1		protein homolog model	sulfonamide resistant sul	sulfonamide antibiotic	antibiotic target replacement	100	101.43
		Strict	APH(6)-Id		protein homolog model	APH(6)	aminoglycoside antibiotic	antibiotic inactivation	99.64	100
		Strict	APH(3')-Ia		protein homolog model	APH(3')	aminoglycoside antibiotic	antibiotic inactivation	99.26	100
16	T. pyogenes NCTC5224	-
17	T. pyogenes MS249	Strict	tet(W/N/W)		protein homolog model	tetracycline-resistant ribosomal protection protein	tetracycline antibiotic	antibiotic target protection	92.79	100
		Strict	Mycobacterium tuberculosis rpsL mutations conferring resistance to Streptomycin	K88R	protein variant model	antibiotic-resistant rpsL	aminoglycoside antibiotic	antibiotic target alteration	83.74	100
18	T. pyogenes SH03	Strict	tet(W/N/W)		protein homolog model	tetracycline-resistant ribosomal protection protein	tetracycline antibiotic	antibiotic target protection	95.61	100
19	T. pyogenes UFV1	-	-	-	-	-	-	-	-
