# Supplementary figures and images for: Comparative Genome Analysis of 19 Trueperella pyogenes Strains Originating from Different Animal Species Reveal a Genetically Diverse Open Pan-Genome
Source: MDPI journal article supplement (doi:10.3390/antibiotics12010024), 2022-12-24

Figure S3. ANI\_MEAN300.

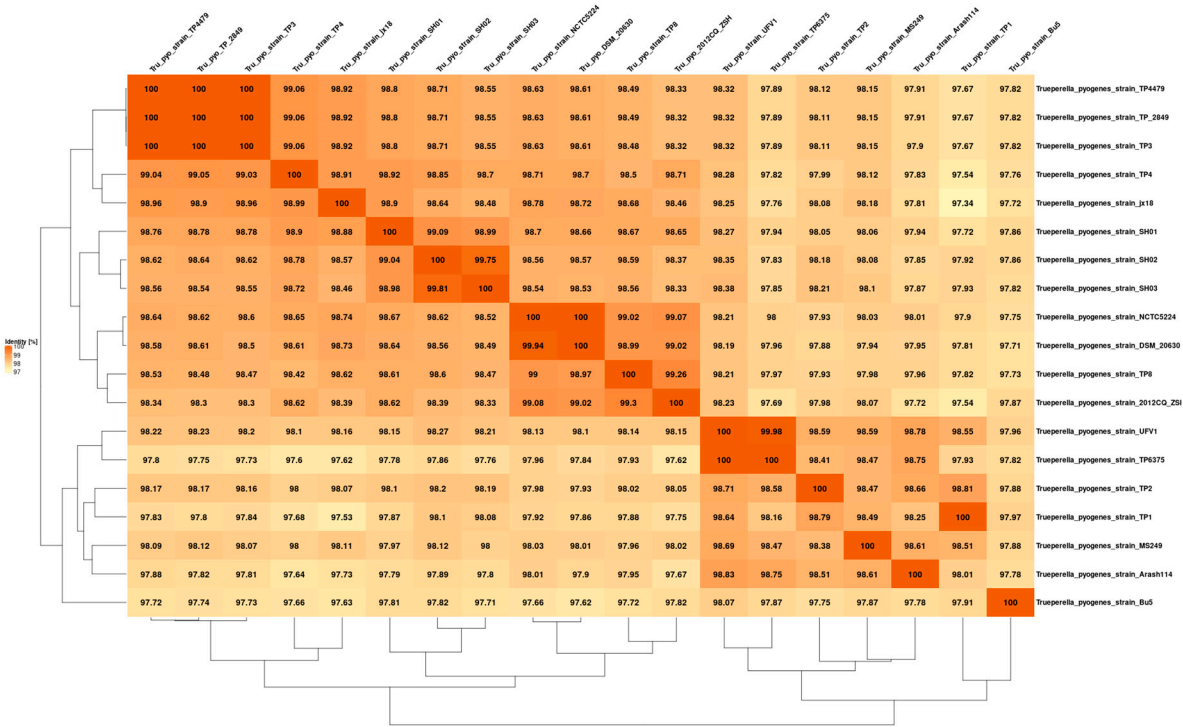

Supplement: s1 [file s1]
